# Supplementary material for: Is China decoupling from the global value chain? A quantitative analysis framework based on the global production network
Source: Research Square preprint supplement (doi:10.21203/rs.3.rs-5355384/v1), 2025-04-10
Supplement: Supplementary file 1 [file 1c43fceb82d712dd49d53e56.docx]

**Appendix**

**Table 2 Countries or Regions’ Names and Abbreviations in ADB.**

| **Abbr.** | **Country/Region** | **Abbr.** | **Country/Region** |
| --- | --- | --- | --- |
| AUS | Australia | NOR | Norway |
| AUT | Austria | POL | Poland |
| BEL | Belgium | POR | Portugal |
| BGR | Bulgaria | ROM | Romania |
| BRA | Brazil | RUS | Russia |
| CAN | Canada | SVK | Slovak Republic |
| SWI | Switzerland | SVN | Slovenia |
| PRC | People's Republic of China | SWE | Sweden |
| CYP | Cyprus | TUR | Turkey |
| CZE | Czech Republic | TAP | Taipei, China |
| GER | Germany | USA | United States |
| DEN | Denmark | BAN | Bangladesh |
| SPA | Spain | MAL | Malaysia |
| EST | Estonia | PHI | Philippines |
| FIN | Finland | THE | Thailand |
| FRA | France | VIEW | Viet Nam |
| UKG | United Kingdom | KAZ | Kazakhstan |
| GRC | Greece | MON | Mongolia |
| HRV | Croatia | SRI | Sri Lanka |
| HUN | Hungary | PAK | Pakistan |
| INO | Indonesia | FIJ | Fiji |
| IND | India | LAO | Lao People's Democratic Republic |
| IRE | Ireland | BRU | Brunei Darussalam |
| ITA | Italy | BHU | Bhutan |
| JPN | Japan | KGZ | Kyrgyz Republic |
| KOR | Republic of Korea | CAM | Cambodia |
| LTU | Lithuania | MLD | Maldives |
| LUX | Luxembourg | NEP | Nepal |
| LVA | Latvia | SIN | Singapore |
| MEX | Mexico | HKG | Hong Kong, China |
| MLT | Malta | ROW | Rest of the World |
| NET | Netherlands |  |  |

**Table 3 Industrial Sectors’ Names and Abbreviations in ADB.**

| **Abbr.** | **Industrial Sector** | **ERDI Aggregation (5 sectors)** |
| --- | --- | --- |
| S1 | Agriculture, Hunting, Forestry and Fishing | Primary |
| S2 | Mining and Quarrying | Primary |
| S3 | Food, Beverages and Tobacco | Low tech |
| S4 | Textiles and Textile Products | Low tech |
| S5 | Leather, Leather and Footwear | Low tech |
| S6 | Wood and Products of Wood and Cork | Low tech |
| S7 | Pulp, Paper, Paper, Printing and Publishing | Low tech |
| S8 | Coke, Refined Petroleum and Nuclear Fuel | High and medium tech |
| S9 | Chemicals and Chemical Products | High and medium tech |
| S10 | Rubber and Plastics | Low tech |
| S11 | Other Non-Metallic Mineral | High and medium tech |
| S12 | Basic Metals and Fabricated Metal | High and medium tech |
| S13 | Machinery, Nec | High and medium tech |
| S14 | Electrical and Optical Equipment | High and medium tech |
| S15 | Transport Equipment | High and medium tech |
| S16 | Manufacturing, Nec; Recycling | Low tech |
| S17 | Electricity, Gas and Water Supply | Low tech |
| S18 | Construction | Low tech |
| S19 | Sale, Maintenance and Repair of Motor Vehicles and Motorcycles; Retail Sale of Fuel | Business services |
| S20 | Wholesale Trade and Commission Trade, Except of Motor Vehicles and Motorcycles | Business services |
| S21 | Retail Trade, Except of Motor Vehicles and Motorcycles; Repair of Household Goods | Business services |
| S22 | Hotels and Restaurants | Business services |
| S23 | Inland Transport | Business services |
| S24 | Water Transport | Business services |
| S25 | Air Transport | Business services |
| S26 | Other Supporting and Auxiliary Transport Activities; Activities of Travel Agencies | Business services |
| S27 | Post and Telecommunications | Business services |
| S28 | Financial Intermediation | Business services |
| S29 | Real Estate Activities | Business services |
| S30 | Renting of M&Eq and Other Business Activities | Business services |
| S31 | Public Admin and Defence; Compulsory Social Security | Public and welfare services |
| S32 | Education | Public and welfare services |
| S33 | Health and Social Work | Public and welfare services |
| S34 | Other Community, Social and Personal Services | Public and welfare services |
| S35 | Private Households with Employed Persons | Public and welfare services |
