# Supplementary material for: Is China decoupling from the global value chain? A quantitative analysis framework based on the global production network
Source: Research Square preprint supplement (doi:10.21203/rs.3.rs-5355384/v1), 2025-04-10
Supplement: Supplementary file 2 [file 53bfe51ced64da65a7fca280.xlsx]

## Sheet: BISC和GVCBDI
Sector	2017	2018	2019	2020	2021	2022	2023				2018	2019	2020	2021	2022	2023
AUSS1	0.361844	0.387718	0.345311	0.394957	0.399945	0.241724	0.303596				0.0715062	-0.109376	0.143772	0.0126299	-0.395607	0.255961
AUSS2	0.456449	0.600106	0.506233	0.575504	0.544861	0.384819	0.456941				0.314727	-0.156428	0.136837	-0.0532468	-0.29373	0.187419
AUSS3	0.544113	0.604914	0.561437	0.597623	0.597866	0.50511	0.540152				0.111744	-0.0718732	0.0644533	0.00040562	-0.155144	0.0693742
AUSS4	0.0951735	0.141937	0.116078	0.105302	0.0931437	0.0226906	0.0483741				0.491355	-0.182188	-0.0928366	-0.11546	-0.756392	1.1319
AUSS5	0.0159419	0.0655861	0.0358604	0.0477598	0.0309077	-0.00451968	0.00867063				3.11408	-0.453232	0.331825	-0.352852	-1.14623	-2.91842
AUSS6	0.206967	0.242638	0.206247	0.237675	0.236381	0.130087	0.170477				0.172354	-0.149983	0.152383	-0.00544515	-0.44967	0.310484
AUSS7	0.316226	0.296574	0.227392	0.27681	0.255956	0.1674	0.234093				-0.0621444	-0.233271	0.217326	-0.0753374	-0.345983	0.398407
AUSS8	0.0428312	0.215229	0.13605	-0.163791	-0.0653389	-0.256717	-0.314144				4.02505	-0.367882	-2.2039	-0.601084	2.929	0.223698
AUSS9	0.0603678	0.244328	0.174829	0.248537	0.236363	0.10613	0.179911				3.04732	-0.28445	0.4216	-0.0489793	-0.550987	0.695189
AUSS10	0.0767523	0.171725	0.132648	0.172339	0.139617	0.0438747	0.0868458				1.23739	-0.227556	0.299221	-0.189871	-0.685748	0.979403
AUSS11	0.115541	0.247424	0.165966	0.212881	0.241039	0.100692	0.174147				1.14144	-0.329224	0.282679	0.13227	-0.582261	0.729511
AUSS12	0.375132	0.604415	0.539768	0.612265	0.617039	0.484629	0.543843				0.611204	-0.106958	0.134311	0.00779681	-0.214589	0.122185
AUSS13	0.154354	0.20833	0.154989	0.218684	0.20941	0.0851977	0.141903				0.349689	-0.256041	0.41097	-0.0424095	-0.593154	0.665578
AUSS14	0.116806	0.184054	0.13186	0.119327	0.169454	0.0523412	0.104569				0.57572	-0.283577	-0.0950517	0.420085	-0.691119	0.997834
AUSS15	0.32072	0.318538	0.246077	0.301417	0.270205	0.126806	0.195376				-0.00680242	-0.227481	0.224891	-0.103554	-0.530703	0.540748
AUSS16	0.0020932	0.100177	0.0691155	0.091796	0.0682721	-0.00457149	0.0276267				46.8584	-0.310067	0.328153	-0.256263	-1.06696	-7.04326
AUSS17	0.4676	0.4725	0.39982	0.469597	0.474281	0.31925	0.384679				0.0104792	-0.15382	0.17452	0.00997315	-0.326876	0.204948
AUSS18	0.602842	0.634828	0.555082	0.616581	0.621409	0.442336	0.522938				0.0530578	-0.125618	0.110794	0.00782968	-0.288173	0.18222
AUSS19	0.15035	0.163805	-0.106714	0.225574	0.199991	0.068428	0.113036				0.089494	-1.65147	-3.11383	-0.113413	-0.657844	0.651891
AUSS20	0.514128	0.543006	0.478139	0.524164	0.528578	0.373639	0.458244				0.056169	-0.119459	0.0962596	0.00842153	-0.293125	0.226434
AUSS21	0.467097	0.528214	0.461727	0.526956	0.541477	0.388485	0.463015				0.130846	-0.125872	0.141272	0.0275564	-0.282546	0.191848
AUSS22	0.468837	0.523634	0.460897	0.49446	0.488763	0.34943	0.446908				0.116877	-0.119811	0.0728219	-0.0115227	-0.285073	0.278964
AUSS23	0.342148	0.402789	0.331315	0.408265	0.385265	0.222699	0.307378				0.177236	-0.177446	0.232253	-0.0563354	-0.421958	0.38024
AUSS24	0.0676604	0.136899	0.107177	0.133583	0.106609	0.0228095	0.0682276				1.02332	-0.21711	0.24638	-0.20193	-0.786045	1.99119
AUSS25	0.239825	0.356164	0.292751	0.306937	0.178156	0.102417	0.173961				0.4851	-0.178044	0.0484584	-0.41957	-0.425127	0.698562
AUSS26	0.416108	0.443545	0.38164	0.427146	0.438016	0.309021	0.389931				0.065937	-0.139568	0.119236	0.0254479	-0.294497	0.261824
AUSS27	0.41866	0.477295	0.411871	0.466295	0.468521	0.31205	0.380043				0.140054	-0.137073	0.13214	0.00477355	-0.333969	0.217892
AUSS28	0.659931	0.636521	0.575321	0.626726	0.634131	0.505387	0.559521				-0.0354727	-0.0961476	0.0893502	0.0118149	-0.203024	0.107114
AUSS29	0.686022	0.681601	0.607279	0.636806	0.605582	0.456391	0.520332				-0.00644456	-0.109041	0.048622	-0.049031	-0.24636	0.1401
AUSS30	0.589789	0.596303	0.530051	0.584141	0.594891	0.444829	0.507171				0.0110458	-0.111106	0.102047	0.0184037	-0.252251	0.140147
AUSS31	0.474734	0.553679	0.475862	0.562614	0.581484	0.416399	0.482854				0.166291	-0.140545	0.182306	0.033539	-0.283904	0.159596
AUSS32	0.412396	0.472995	0.400755	0.453324	0.463511	0.299536	0.369506				0.146944	-0.15273	0.131176	0.0224718	-0.353767	0.233592
AUSS33	0.46211	0.43965	0.337078	0.528571	0.292466	0.402999	0.462157				-0.0486042	-0.233304	0.568099	-0.446685	0.377934	0.146795
AUSS34	0.472665	0.53171	0.45742	0.509051	0.510444	0.359747	0.425051				0.124919	-0.13972	0.112875	0.00273531	-0.295226	0.181527
AUSS35	0.0100558	0.0437115	0.0190071	0.034408	0.0236151	-0.0137545	0.00195227				3.34691	-0.56517	0.810273	-0.313673	-1.58245	-1.14194
AUTS1	-0.165614	-0.182222	-0.207005	-0.0774031	-0.175505	-0.160443	-0.179138				0.10028	0.136007	-0.626081	1.26742	-0.0858212	0.116521
AUTS2	-0.199991	-0.217119	-0.193484	-0.159575	-0.181298	-0.239445	-0.324893				0.0856484	-0.108857	-0.175259	0.136131	0.320732	0.356855
AUTS3	-0.0295277	-0.102977	-0.156936	0.0842582	-0.136449	-0.0840156	-0.053133				2.48747	0.523991	-1.5369	-2.61942	-0.384271	-0.367582
AUTS4	-0.303803	-0.259959	-0.192521	-0.133026	-0.146626	-0.146917	-0.137913				-0.144318	-0.259418	-0.309029	0.102233	0.0019852	-0.0612865
AUTS5	-0.174333	-0.170012	-0.171076	-0.12455	-0.146095	-0.146593	-0.142691				-0.0247868	0.00625897	-0.271961	0.172987	0.00340388	-0.026617
AUTS6	-0.0852667	-0.100998	-0.0930819	-0.0323296	-0.0673459	-0.0908066	-0.186215				0.184494	-0.0783782	-0.652676	1.0831	0.348362	1.05067
AUTS7	-0.311758	-0.281073	-0.231005	-0.160093	-0.21431	-0.366153	-0.431069				-0.0984267	-0.178132	-0.306971	0.33866	0.708515	0.177294
AUTS8	-0.704239	-0.724283	-0.655728	-0.484528	-0.609437	-0.638016	-0.619423				0.0284622	-0.0946525	-0.261084	0.257796	0.0468943	-0.0291425
AUTS9	-0.678043	-0.612356	-0.559078	-0.592883	-0.639066	-0.633791	-0.670757				-0.0968777	-0.0870041	0.0604647	0.0778959	-0.0082549	0.0583265
AUTS10	-0.459317	-0.282092	-0.274319	-0.30817	-0.285562	-0.3097	-0.213429				-0.385844	-0.027555	0.1234	-0.0733643	0.0845292	-0.310854
AUTS11	-0.418205	-0.335043	-0.276359	-0.277995	-0.2982	-0.460336	-0.488331				-0.198855	-0.175154	0.00591998	0.0726839	0.543713	0.0608145
AUTS12	-0.537782	-0.591903	-0.562083	-0.530785	-0.670893	-0.709149	-0.610279				0.100636	-0.0503793	-0.0556822	0.263963	0.0570232	-0.139421
AUTS13	-0.422382	-0.370021	-0.421757	-0.440689	-0.522954	-0.514596	-0.523565				-0.123966	0.139821	0.0448876	0.186673	-0.015982	0.0174298
AUTS14	-0.515066	-0.49056	-0.473136	-0.445458	-0.434572	-0.401972	-0.536571				-0.0475799	-0.0355174	-0.0584996	-0.0244381	-0.0750164	0.334849
AUTS15	-0.644103	-0.734158	-0.698987	-0.716943	-0.697758	-0.70877	-0.687727				0.139815	-0.0479068	0.0256899	-0.0267594	0.0157811	-0.0296894
AUTS16	-0.390813	-0.388505	-0.34139	-0.367341	-0.426957	-0.450665	-0.422341				-0.00590533	-0.121273	0.076016	0.162291	0.0555274	-0.0628482
AUTS17	-0.883211	-0.834983	-0.77419	-0.751848	-0.812971	-0.877682	-0.881977				-0.0546052	-0.0728085	-0.0288587	0.0812975	0.0795987	0.00489344
AUTS18	-0.321835	-0.370667	0.0302956	0.12348	-0.127655	-0.0579427	-0.0654555				0.151731	-1.08173	3.07583	-2.03381	-0.546098	0.129659
AUTS19	-0.303922	-0.346563	-0.23376	-0.160394	-0.321644	-0.311545	-0.205946				0.1403	-0.325489	-0.313852	1.00533	-0.0313973	-0.338952
AUTS20	-0.224457	-0.197593	-0.103314	-0.00451321	-0.121249	-0.0743437	-0.0992432				-0.119683	-0.477137	-0.956316	25.8654	-0.386852	0.334923
AUTS21	-0.297658	-0.125345	-0.0131705	0.101411	-0.0195015	-0.245632	-0.299488				-0.578896	-0.894926	-8.69988	-1.1923	11.5956	0.219256
AUTS22	-0.250309	-0.00621395	0.0321139	0.0509253	-0.0524174	-0.16116	-0.179743				-0.975175	-6.16804	0.58577	-2.0293	2.07455	0.115313
AUTS23	-0.415764	-0.227097	-0.160007	-0.0873741	-0.156798	-0.218168	-0.224764				-0.453782	-0.295426	-0.453936	0.79456	0.391397	0.0302326
AUTS24	-0.0813827	-0.0726114	-0.0796996	-0.0702424	-0.0749835	-0.0829628	-0.0863427				-0.107779	0.0976189	-0.118661	0.0674966	0.106414	0.0407395
AUTS25	-0.246164	-0.167483	-0.096816	-0.0688045	-0.136758	-0.229037	-0.221961				-0.319628	-0.421935	-0.289327	0.987629	0.67476	-0.0308936
AUTS26	-0.363582	-0.249169	-0.15859	-0.085188	-0.163303	-0.315319	-0.294613				-0.314682	-0.363526	-0.46284	0.916968	0.930888	-0.0656674
AUTS27	-0.294415	-0.283997	-0.233595	-0.162564	-0.223205	-0.201537	-0.205692				-0.0353867	-0.177473	-0.304076	0.373026	-0.097077	0.0206139
AUTS28	-0.321449	-0.28142	-0.171632	-0.0681714	-0.187126	-0.145908	-0.141737				-0.124527	-0.390121	-0.602806	1.74493	-0.220268	-0.0285824
AUTS29	-0.408612	-0.174569	0.00659709	0.0369352	-0.0925382	-0.363435	-0.411116				-0.572776	-1.03779	4.59872	-3.50542	2.9274	0.131197
AUTS30	-0.463188	-0.380541	-0.250093	-0.137373	-0.269496	-0.212197	-0.177312				-0.178432	-0.342796	-0.450713	0.961784	-0.212613	-0.1644
AUTS31	-0.325661	-0.170991	-0.0638455	-0.0302734	-0.085544	-0.27497	-0.308635				-0.474941	-0.626615	-0.525833	1.82571	2.21437	0.122431
AUTS32	-0.460394	-0.228739	-0.165491	-0.161962	-0.203778	-0.358216	-0.410624				-0.503166	-0.276509	-0.0213262	0.258186	0.757876	0.146302
AUTS33	-0.454874	-0.227474	-0.121403	-0.105672	-0.174748	-0.383767	-0.454692				-0.499918	-0.466299	-0.129577	0.653683	1.19611	0.184811
AUTS34	-0.253533	-0.29855	-0.321372	-0.154586	-0.221831	-0.227672	-0.294686				0.17756	0.0764423	-0.518981	0.435004	0.026329	0.294346
AUTS35											#DIV/0!	#DIV/0!	#DIV/0!	#DIV/0!	#DIV/0!	#DIV/0!
BELS1	-0.493934	-0.374157	-0.116026	-0.322184	-0.45515	-0.515804	-0.333898				-0.242495	-0.6899	1.77682	0.412704	0.133261	-0.352665
BELS2	-0.174832	-0.130645	-0.129776	-0.156205	-0.156723	-0.145877	-0.145981				-0.252744	-0.00664763	0.203653	0.00331363	-0.0692029	0.000713959
BELS3	-0.697157	-0.536201	-0.0467931	-0.399115	-0.61547	-0.691967	-0.404887				-0.230875	-0.912732	7.52936	0.542086	0.12429	-0.414874
BELS4	-0.256766	-0.16013	-0.263604	-0.321065	-0.434932	-0.322953	-0.363792				-0.376358	0.646181	0.217986	0.354653	-0.257463	0.126454
BELS5	-0.0717347	-0.0840761	-0.0762028	-0.0810203	-0.0676228	-0.0651581	-0.0739945				0.172042	-0.0936441	0.0632195	-0.16536	-0.036448	0.135616
BELS6	-0.366885	-0.238318	-0.131255	-0.154577	-0.260464	-0.218903	-0.153087				-0.350429	-0.449246	0.177689	0.685008	-0.159564	-0.300663
BELS7	-0.329611	-0.196724	-0.192542	-0.258577	-0.316801	-0.240755	-0.205133				-0.403163	-0.0212585	0.342967	0.225171	-0.240046	-0.147957
BELS8	-0.788346	0.0843936	0.0363936	-0.232649	-0.626584	-0.650275	-0.509923				-1.10705	-0.568763	-7.39258	1.69326	0.0378098	-0.215834
BELS9	-0.804002	-0.6634	-0.752589	-0.785744	-0.888387	-0.85667	-0.846088				-0.174877	0.134442	0.0440546	0.130632	-0.035701	-0.012353
BELS10	-0.354483	-0.416116	-0.29853	-0.252484	-0.610668	-0.528107	-0.539592				0.173868	-0.282581	-0.154242	1.41864	-0.135197	0.0217473
BELS11	-0.428442	-0.194137	-0.185468	-0.253713	-0.336532	-0.246484	-0.202305				-0.546877	-0.0446521	0.367956	0.326432	-0.267578	-0.179235
BELS12	-0.781093	-0.615948	-0.51558	-0.504785	-0.61648	-0.594179	-0.547627				-0.211429	-0.162948	-0.0209379	0.221273	-0.0361748	-0.0783483
BELS13	-0.356783	-0.192714	-0.171454	-0.256952	-0.373212	-0.246793	-0.148336				-0.459856	-0.11032	0.498666	0.452456	-0.338733	-0.398944
BELS14	-0.328899	-0.195726	-0.188703	-0.250092	-0.297376	-0.231091	-0.205103				-0.404905	-0.0358818	0.325319	0.189066	-0.2229	-0.112457
BELS15	-0.692765	-0.48153	-0.262805	-0.447944	-0.475274	-0.581309	-0.615116				-0.304916	-0.454229	0.704473	0.061012	0.223104	0.058156
BELS16	-0.216761	-0.16267	-0.150312	-0.186723	-0.244899	-0.218537	-0.174743				-0.249542	-0.0759707	0.242238	0.311565	-0.107646	-0.200397
BELS17	-0.733905	-0.13951	-0.133833	-0.186879	-0.395165	-0.481166	-0.059796				-0.809908	-0.0406864	0.396356	1.11455	0.217632	-0.875727
BELS18	-0.518899	-0.00181591	0.0840345	-0.0574622	-0.260811	0.0229895	0.217929				-0.9965	-47.2767	-1.68379	3.53882	-1.08815	8.47952
BELS19	-0.386011	-0.149079	-0.130136	-0.247684	-0.40943	-0.245774	-0.195278				-0.613797	-0.127063	0.903263	0.653038	-0.399718	-0.205457
BELS20	-0.263112	0.153206	0.197123	0.0232875	-0.276227	0.0377428	0.243687				-1.58229	0.286651	-0.881863	-12.8616	-1.13664	5.4565
BELS21	-0.305675	-0.0190032	-0.00681853	-0.0917604	-0.288347	-0.193906	-0.100802				-0.937832	-0.64119	12.4575	2.14239	-0.327525	-0.480149
BELS22	-0.539566	-0.371307	-0.0256607	-0.317261	-0.470401	-0.532953	-0.31487				-0.311842	-0.930891	11.3637	0.482695	0.132975	-0.409196
BELS23	-0.30019	-0.118387	0.00365536	-0.125585	-0.300762	-0.124039	0.0121603				-0.605625	-1.03088	-35.3564	1.39489	-0.587585	-1.09804
BELS24	-0.299021	-0.205859	-0.162791	-0.206571	-0.256265	-0.312248	-0.181778				-0.311557	-0.209214	0.268938	0.240565	0.218459	-0.417843
BELS25	-0.267441	-0.282216	-0.292144	-0.186212	-0.289057	-0.401666	-0.279327				0.055247	0.0351783	-0.362602	0.552299	0.389574	-0.30458
BELS26	-0.368229	-0.124539	-0.0166764	-0.189092	-0.389622	-0.182024	-0.0398179				-0.661789	-0.866095	10.3389	1.06049	-0.53282	-0.781249
BELS27	-0.391241	-0.164592	-0.165616	-0.267307	-0.399945	-0.259851	-0.160399				-0.579308	0.0062224	0.614017	0.496199	-0.350282	-0.382728
BELS28	-0.347783	0.0719206	0.0657509	-0.0768464	-0.356323	-0.0969961	0.0939276				-1.2068	-0.085784	-2.16875	3.63682	-0.727786	-1.96836
BELS29	-0.477634	0.0770448	0.146042	0.00214201	-0.220211	-0.0332945	0.0775557				-1.1613	0.895541	-0.985333	-103.806	-0.848806	-3.32938
BELS30	-0.426337	0.0470783	0.0608752	-0.14062	-0.459385	-0.191614	0.0568417				-1.11043	0.293061	-3.30997	2.26685	-0.582891	-1.29665
BELS31	-0.396089	-0.120785	-0.119905	-0.230107	-0.409418	-0.222879	-0.080743				-0.695055	-0.00728484	0.919071	0.779249	-0.455619	-0.637728
BELS32	-0.354371	-0.196512	-0.191758	-0.2668	-0.343714	-0.250528	-0.202039				-0.445462	-0.0241946	0.391337	0.288286	-0.271117	-0.193548
BELS33	-0.454989	-0.0916756	-0.285468	-0.209251	-0.627136	-0.498305	-0.379704				-0.79851	2.1139	-0.266992	1.99706	-0.205427	-0.238008
BELS34	-0.395188	-0.0800406	-0.0744773	-0.208308	-0.40929	-0.224511	-0.062341				-0.797462	-0.0695055	1.79694	0.964829	-0.451462	-0.722326
BELS35											#DIV/0!	#DIV/0!	#DIV/0!	#DIV/0!	#DIV/0!	#DIV/0!
BGRS1	-0.3461	-0.142423	-0.203804	-0.136103	-0.432966	-0.678234	-0.455829				-0.588492	0.430983	-0.332189	2.18117	0.566483	-0.327918
BGRS2	-0.565888	-0.497294	-0.489883	-0.530352	-0.639133	-0.656527	-0.659297				-0.121216	-0.0149025	0.0826101	0.20511	0.0272161	0.00421775
BGRS3	-0.218284	0.0906545	-0.00750515	0.108131	-0.308438	-0.630786	-0.360514				-1.4153	-1.08279	-15.4076	-3.85244	1.0451	-0.428468
BGRS4	-0.476973	-0.232182	-0.299211	-0.220566	-0.378805	-0.356418	-0.3738				-0.513217	0.288688	-0.262839	0.71742	-0.0590983	0.0487666
BGRS5	-0.18448	-0.151599	-0.158827	-0.155418	-0.204209	-0.19296	-0.212664				-0.178236	0.0476777	-0.0214621	0.313932	-0.0550865	0.102116
BGRS6	-0.225251	-0.204629	-0.198075	-0.171635	-0.415477	-0.456045	-0.480568				-0.0915502	-0.0320291	-0.133488	1.42071	0.0976429	0.0537735
BGRS7	-0.410976	-0.345039	-0.374384	-0.384127	-0.478448	-0.50518	-0.538153				-0.16044	0.085049	0.0260247	0.245545	0.055873	0.0652689
BGRS8	-0.93333	-0.860353	-0.882658	-0.821405	-0.680541	-0.730155	-0.684862				-0.0781894	0.0259248	-0.0693961	-0.171492	0.0729036	-0.0620318
BGRS9	-0.737787	-0.630682	-0.696878	-0.658586	-0.709709	-0.705647	-0.717583				-0.145171	0.10496	-0.0549478	0.077625	-0.00572329	0.0169156
BGRS10	-0.410549	-0.281201	-0.393934	-0.257427	-0.419859	-0.392586	-0.388939				-0.315061	0.4009	-0.346522	0.630984	-0.0649589	-0.00928974
BGRS11	-0.530987	-0.529951	-0.643438	-0.505788	-0.579837	-0.603253	-0.617675				-0.00195185	0.214147	-0.21393	0.146404	0.0403842	0.0239058
BGRS12	-0.83035	-0.770139	-0.74237	-0.640737	-0.726675	-0.735647	-0.684156				-0.0725133	-0.0360565	-0.136904	0.134124	0.0123472	-0.0699951
BGRS13	-0.532648	-0.287895	-0.478135	-0.449523	-0.528011	-0.507168	-0.525097				-0.459503	0.660799	-0.059842	0.174603	-0.0394741	0.0353505
BGRS14	-0.365727	-0.29855	-0.354572	-0.288998	-0.402436	-0.392823	-0.439924				-0.183681	0.187649	-0.184939	0.392522	-0.0238849	0.119902
BGRS15	-0.379696	-0.221759	-0.407301	-0.187256	-0.419802	-0.441147	-0.437602				-0.415957	0.836686	-0.540252	1.24186	0.050846	-0.00803638
BGRS16	-0.178867	-0.170054	-0.197677	-0.17135	-0.311995	-0.317345	-0.327397				-0.0492706	0.162435	-0.133182	0.820806	0.0171483	0.0316756
BGRS17	-0.84942	-0.750997	-0.792682	-0.764984	-0.866306	-0.878333	-0.851795				-0.115871	0.0555073	-0.0349425	0.132449	0.0138835	-0.0302139
BGRS18	-0.279812	-0.0273966	-0.119888	-0.0251191	-0.216678	-0.352598	-0.326452				-0.902089	3.37603	-0.790479	7.62605	0.627288	-0.0741517
BGRS19	-0.552358	-0.485314	-0.507513	-0.413834	-0.62151	-0.640623	-0.646402				-0.121378	0.0457423	-0.184585	0.501834	0.0307516	0.00902129
BGRS20	-0.49215	-0.202077	-0.284658	-0.171224	-0.544085	-0.584174	-0.54627				-0.5894	0.408662	-0.398492	2.17762	0.0736811	-0.0648841
BGRS21	-0.253546	-0.0670116	-0.114207	-0.0972891	-0.311192	-0.386804	-0.3846				-0.735703	0.704293	-0.148137	2.19863	0.242973	-0.00569673
BGRS22	-0.176636	-0.104614	-0.108352	-0.18044	-0.323183	-0.372269	-0.358265				-0.407746	0.0357343	0.665314	0.791084	0.151883	-0.0376169
BGRS23	-0.703163	-0.426713	-0.514493	-0.275421	-0.325491	-0.483759	-0.36244				-0.393152	0.205713	-0.464675	0.181794	0.486243	-0.250784
BGRS24	-0.20685	-0.106824	-0.142745	-0.12223	-0.136463	-0.170859	-0.163265				-0.483569	0.336268	-0.143718	0.116443	0.252052	-0.0444465
BGRS25	-0.453114	-0.157163	-0.31106	-0.158635	-0.268918	-0.332022	-0.293496				-0.65315	0.979224	-0.490018	0.6952	0.234658	-0.116036
BGRS26	-0.410162	-0.207453	-0.189778	-0.0573211	-0.196027	-0.273864	-0.2486				-0.494217	-0.0851993	-0.697957	2.4198	0.397076	-0.0922499
BGRS27	-0.252079	-0.150833	-0.172727	-0.148453	-0.258199	-0.343029	-0.34725				-0.401642	0.145147	-0.140531	0.739262	0.328544	0.0123045
BGRS28	-0.205955	-0.0743869	-0.0871111	-0.106022	-0.269449	-0.342151	-0.331908				-0.63882	0.171053	0.217085	1.54145	0.269817	-0.0299363
BGRS29	-0.24845	0.112366	-0.0815445	-0.0384592	-0.176646	-0.269103	-0.275884				-1.45227	-1.72571	-0.528366	3.59308	0.523402	0.0251982
BGRS30	-0.253442	0.0962409	-0.0327436	-0.0532027	-0.362394	-0.438397	-0.426535				-1.37974	-1.34023	0.624824	5.81157	0.209726	-0.0270594
BGRS31	-0.48033	-0.29606	-0.316269	-0.211479	-0.474124	-0.522064	-0.494035				-0.383632	0.0682583	-0.331332	1.24195	0.101111	-0.0536885
BGRS32	-0.254601	-0.149357	-0.199539	-0.221091	-0.237069	-0.251315	-0.249254				-0.413368	0.335985	0.108009	0.0722713	0.0600924	-0.00820035
BGRS33	-0.4294	-0.185111	-0.219936	-0.149883	-0.426015	-0.507122	-0.496909				-0.568908	0.188134	-0.318516	1.84232	0.190386	-0.0201398
BGRS34	-0.235133	-0.0975117	-0.096105	-0.158988	-0.260391	-0.326118	-0.30838				-0.585291	-0.0144267	0.654312	0.637805	0.252418	-0.0543911
BGRS35											#DIV/0!	#DIV/0!	#DIV/0!	#DIV/0!	#DIV/0!	#DIV/0!
BRAS1	0.142225	0.153246	0.114007	-0.0357325	-0.0359461	-0.123555	-0.146597				0.0774898	-0.25605	-1.31342	0.00597904	2.43724	0.186488
BRAS2	0.284307	0.315481	0.287125	0.187394	0.214267	0.154914	0.163745				0.109649	-0.0898802	-0.347343	0.143402	-0.277006	0.0570062
BRAS3	0.538208	0.556833	0.512393	0.485429	0.484609	0.476054	0.469981				0.0346042	-0.0798074	-0.0526246	-0.00168847	-0.0176538	-0.0127572
BRAS4	0.0407124	0.0224126	-0.00428509	-0.181234	-0.429421	-0.266572	-0.0606716				-0.44949	-1.19119	41.2941	1.36943	-0.379228	-0.772401
BRAS5	-0.0370295	-0.0432346	-0.0621388	-0.103297	-0.0629407	-0.0865439	-0.0716865				0.167572	0.437246	0.662364	-0.390684	0.375008	-0.171675
BRAS6	-0.0672021	-0.0605511	-0.0754125	-0.132706	-0.128162	-0.154954	-0.16152				-0.0989693	0.245435	0.759735	-0.0342443	0.209052	0.0423748
BRAS7	0.134985	0.240253	0.226739	0.173966	0.174112	0.00699982	0.0217991				0.77985	-0.0562468	-0.23275	0.000840325	-0.959797	2.11423
BRAS8	-0.474969	-0.368016	-0.395522	-0.598941	-0.450111	-0.526231	-0.614916				-0.225178	0.0747393	0.514306	-0.248489	0.169115	0.168529
BRAS9	0.0118566	0.0392903	0.0196817	-0.196347	-0.138596	-0.305314	-0.333797				2.31379	-0.499069	-10.9761	-0.294128	1.20291	0.0932894
BRAS10	-0.0355852	-0.043767	-0.0610904	-0.180452	-0.143201	-0.237329	-0.250377				0.22992	0.39581	1.95386	-0.206432	0.65731	0.0549787
BRAS11	0.125613	0.0629035	0.0401738	-0.0420012	0.00190398	-0.0635652	-0.0565032				-0.499227	-0.361343	-2.04549	-1.04533	-34.3854	-0.111099
BRAS12	0.245238	0.275839	0.259349	0.151193	0.224429	0.159269	0.155425				0.12478	-0.0597806	-0.417031	0.484393	-0.290335	-0.0241405
BRAS13	0.174838	0.203662	0.169461	0.0776242	0.0985966	0.0501186	0.0811375				0.164857	-0.167928	-0.541936	0.270179	-0.49168	0.618909
BRAS14	0.0593623	-0.274466	-0.304354	-0.488014	-0.653392	-0.626429	-0.508315				-5.62357	0.108894	0.603443	0.33888	-0.0412657	-0.188551
BRAS15	0.324017	0.346476	0.214566	0.222184	0.160417	0.204506	0.272318				0.0693155	-0.38072	0.0355062	-0.277999	0.274837	0.331589
BRAS16	0.103287	0.112299	0.0767489	-0.0079009	-0.0997351	-0.0700274	-0.0317663				0.0872525	-0.316565	-1.10294	11.6233	-0.297867	-0.546373
BRAS17	0.246242	0.288189	0.239351	0.0413608	0.109615	0.00794152	0.0051414				0.170347	-0.169463	-0.827196	1.65021	-0.927551	-0.352592
BRAS18	0.420151	0.413164	0.387505	0.338921	0.250231	0.184436	0.228663				-0.0166293	-0.0621045	-0.125375	-0.261685	-0.262935	0.239796
BRAS19	0.321438	0.333602	0.32386	0.25447	0.21383	0.16514	0.176042				0.0378443	-0.0292034	-0.214258	-0.159707	-0.227706	0.0660196
BRAS20	0.209217	0.272976	0.241902	0.136614	0.189957	0.206103	0.176318				0.304751	-0.113835	-0.43525	0.39046	0.0849971	-0.144514
BRAS21	0.220428	0.265162	0.235656	0.110116	0.167791	0.147214	0.0957811				0.202941	-0.111274	-0.532726	0.523763	-0.122632	-0.349376
BRAS22	0.360033	0.363314	0.32097	0.164763	0.173044	0.194384	0.185458				0.00911347	-0.11655	-0.486672	0.0502625	0.123319	-0.0459167
BRAS23	-0.327512	-0.304219	-0.322708	-0.484383	-0.371092	-0.452783	-0.504991				-0.0711228	0.0607755	0.500998	-0.233887	0.220137	0.115304
BRAS24	0.0816879	0.0966032	0.0747494	0.0782057	0.0498321	-0.0150033	0.000383137				0.182588	-0.226223	0.0462395	-0.362808	-1.30108	-1.02554
BRAS25	-0.310889	-0.270153	-0.289551	-0.286954	-0.252519	-0.325222	-0.367627				-0.131031	0.0718028	-0.00897001	-0.12	0.287908	0.13039
BRAS26	0.269763	0.349376	0.323414	0.308866	0.258451	0.148316	0.1582				0.295124	-0.0743118	-0.0449807	-0.163226	-0.426136	0.0666399
BRAS27	0.453718	0.544953	0.529912	0.504732	0.454285	0.389877	0.39418				0.201084	-0.0276017	-0.0475163	-0.0999485	-0.141778	0.0110366
BRAS28	0.48412	0.540781	0.528788	0.51238	0.44742	0.438097	0.450263				0.117038	-0.0221773	-0.0310284	-0.126782	-0.0208362	0.0277705
BRAS29	0.329221	0.360804	0.344474	0.328315	0.256511	0.210275	0.219619				0.0959315	-0.0452594	-0.0469081	-0.218706	-0.180249	0.0444358
BRAS30	0.449773	0.514401	0.504374	0.505725	0.447536	0.376347	0.385446				0.14369	-0.0194937	0.00267895	-0.11506	-0.159069	0.0241774
BRAS31	0.489979	0.518213	0.502799	0.496527	0.431179	0.370901	0.367221				0.0576223	-0.0297439	-0.0124747	-0.13161	-0.139797	-0.00992294
BRAS32	0.322133	0.391499	0.37162	0.352974	0.290087	0.219745	0.220175				0.215332	-0.0507756	-0.0501754	-0.178164	-0.242484	0.00195643
BRAS33	0.252009	0.333687	0.312992	0.292387	0.22935	0.112165	0.138004				0.324108	-0.062019	-0.0658352	-0.215592	-0.510944	0.230362
BRAS34	0.365494	0.386794	0.386543	0.391661	0.388971	0.323543	0.29736				0.0582768	-0.000647502	0.0132402	-0.0068678	-0.168208	-0.0809266
BRAS35											#DIV/0!	#DIV/0!	#DIV/0!	#DIV/0!	#DIV/0!	#DIV/0!
CANS1	0.0411857	0.220012	0.0763347	0.0359923	0.159221	0.0360657	0.0477726				4.34195	-0.653043	-0.528493	3.42375	-0.773487	0.324598
CANS2	0.228937	0.279661	0.108676	-0.133194	0.300486	0.0468808	0.0702117				0.221563	-0.611401	-2.22561	-3.256	-0.843983	0.497664
CANS3	0.348273	0.398233	0.216663	0.188144	0.298206	0.138379	0.134352				0.14345	-0.45594	-0.131625	0.584987	-0.535962	-0.0291035
CANS4	-0.163717	-0.0495213	-0.0776123	-0.0813391	-0.0564366	-0.0757195	-0.0755071				-0.697518	0.567251	0.048018	-0.306157	0.341674	-0.00280529
CANS5	-0.0459348	-0.0463844	-0.0588873	-0.0469182	-0.0367763	-0.0503701	-0.0503836				0.0097877	0.26955	-0.203254	-0.216163	0.369636	0.000266972
CANS6	-0.196894	-0.0694755	-0.100922	0.0451223	0.186831	0.084103	0.0544205				-0.647142	0.45262	-1.4471	3.14055	-0.549845	-0.35293
CANS7	-0.0990249	-0.0716893	-0.484157	-0.407133	-0.214754	-0.20014	-0.194092				-0.276048	5.75355	-0.15909	-0.47252	-0.0680511	-0.0302176
CANS8	-0.43362	-0.222166	-0.307653	0.0571442	0.346868	0.126067	0.135351				-0.487648	0.38479	-1.18574	5.07005	-0.636558	0.0736464
CANS9	-0.521244	-0.490505	-0.543338	-0.537135	-0.44418	-0.437874	-0.466765				-0.0589722	0.107712	-0.011417	-0.173058	-0.0141955	0.0659794
CANS10	-0.42378	-0.453397	-0.48068	-0.504781	-0.473137	-0.413894	-0.365152				0.0698886	0.0601744	0.0501391	-0.0626896	-0.125213	-0.117763
CANS11	-0.171997	-0.0659638	-0.076509	-0.108313	-0.154609	-0.111408	-0.155956				-0.616483	0.159863	0.415696	0.427421	-0.279421	0.399862
CANS12	-0.215484	-0.378595	-0.44143	-0.535574	-0.524583	-0.490153	-0.610328				0.756951	0.16597	0.213271	-0.0205221	-0.065634	0.245178
CANS13	-0.270992	-0.170879	-0.236555	-0.189554	-0.16775	-0.161915	-0.18898				-0.369431	0.384338	-0.198687	-0.115028	-0.0347828	0.16715
CANS14	-0.459366	-0.362678	-0.375312	-0.428278	-0.189356	-0.174863	-0.336758				-0.210481	0.0348351	0.141127	-0.557868	-0.0765358	0.925841
CANS15	-0.760709	-0.75205	-0.778663	-0.616913	-0.670842	-0.66249	-0.728714				-0.0113831	0.0353875	-0.207728	0.0874182	-0.0124509	0.0999628
CANS16	-0.0794331	0.0306706	-0.35306	-0.309478	-0.0326748	-0.0538293	-0.118384				-1.38612	-12.5114	-0.12344	-0.89442	0.647425	1.19925
CANS17	0.021367	0.024849	-0.0408821	-0.141644	-0.102319	-0.17943	-0.171309				0.162961	-2.64522	2.46468	-0.277632	0.753634	-0.0452566
CANS18	0.133374	0.219008	0.138015	0.292046	0.241344	0.200661	0.149943				0.642061	-0.369816	1.11604	-0.17361	-0.168567	-0.252756
CANS19	-0.108062	0.0220762	-0.0541071	-0.131425	-0.0476252	-0.0785867	-0.108401				-1.20429	-3.45092	1.42899	-0.637626	0.650108	0.379376
CANS20	0.263187	0.182997	0.0110449	-0.0504524	0.0557842	-0.174677	-0.169226				-0.304686	-0.939644	-5.56793	-2.10568	-4.1313	-0.0312032
CANS21	0.196086	0.315899	0.277205	0.0411012	0.207905	0.0527785	0.0560348				0.611025	-0.122488	-0.85173	4.05836	-0.746141	0.0616971
CANS22	0.248131	0.279415	0.169336	-0.0105999	0.152334	-0.0252536	-0.00896006				0.126079	-0.393962	-1.0626	-15.3713	-1.16578	-0.645196
CANS23	-0.313008	-0.022032	-0.0326732	0.0460018	0.130406	-0.0445468	-0.0516995				-0.929612	0.482988	-2.40794	1.83481	-1.3416	0.160567
CANS24	-0.167639	-0.0148658	-0.0668153	-0.0900964	-0.0512941	-0.105767	-0.108529				-0.911322	3.49456	0.348438	-0.430675	1.06198	0.0261104
CANS25	-0.332366	-0.199916	-0.238267	-0.0913672	-0.0407775	-0.0996243	-0.101608				-0.398507	0.191834	-0.616534	-0.553696	1.44312	0.0199144
CANS26	-0.0833249	0.0974144	-0.0271987	-0.131913	-0.0362123	-0.186055	-0.181937				-2.16909	-1.27921	3.84997	-0.725484	4.13791	-0.022133
CANS27	0.10471	0.0623485	-0.0848458	-0.177106	-0.0910982	-0.225494	-0.224599				-0.404562	-2.36083	1.08739	-0.48563	1.47528	-0.0039676
CANS28	0.327034	0.224401	0.096539	-0.0543277	0.0945894	-0.152393	-0.14219				-0.313829	-0.569793	-1.56275	-2.74109	-2.6111	-0.0669532
CANS29	0.15319	0.254993	0.193849	0.32863	0.2289	0.193514	0.138643				0.664559	-0.239787	0.695284	-0.30347	-0.154592	-0.283549
CANS30	0.268051	0.134345	-0.100638	-0.218788	-0.0765829	-0.331008	-0.317528				-0.498807	-1.7491	1.17401	-0.649968	3.32222	-0.0407248
CANS31	0.398871	0.435501	0.401552	0.326853	0.435929	0.312775	0.329487				0.0918355	-0.077953	-0.186026	0.333714	-0.282509	0.0534301
CANS32	-0.0570246	-0.00282887	-0.0632438	0.0184925	-0.084201	-0.0875233	-0.124427				-0.950392	21.3565	-1.2924	-5.55326	0.039456	0.42164
CANS33	0.0887959	0.157923	0.0583901	-0.0306888	0.034768	-0.131003	-0.143411				0.778493	-0.630262	-1.52558	-2.13292	-4.76793	0.094711
CANS34	0.174194	0.211537	0.0463363	-0.126695	0.00816548	-0.170162	-0.1593				0.21438	-0.780954	-3.73425	-1.06445	-21.8392	-0.0638323
CANS35											#DIV/0!	#DIV/0!	#DIV/0!	#DIV/0!	#DIV/0!	#DIV/0!
SWIS1	-0.0377992	-0.174392	-0.202918	-0.195566	-0.205644	-0.167346	-0.206647				3.61364	0.163577	-0.0362346	0.0515333	-0.186234	0.234848
SWIS2	-0.122477	-0.124377	-0.142957	-0.151025	-0.136479	-0.125043	-0.128487				0.0155174	0.149384	0.0564374	-0.0963147	-0.0837927	0.0275419
SWIS3	0.195465	-0.105532	-0.125922	-0.116027	-0.18378	-0.118225	-0.221424				-1.5399	0.193218	-0.0785822	0.583942	-0.356702	0.872894
SWIS4	-0.194554	-0.362625	-0.140784	-0.265908	-0.115984	-0.114823	-0.10838				0.863879	-0.611765	0.888772	-0.563819	-0.0100133	-0.0561144
SWIS5	-0.145481	-0.196637	-0.105894	-0.0798629	-0.0622525	-0.0672734	-0.0913322				0.351635	-0.461475	-0.245823	-0.220508	0.0806544	0.357627
SWIS6	-0.105671	-0.206744	-0.228638	-0.219898	-0.212726	-0.181569	-0.194058				0.956497	0.105899	-0.0382278	-0.032614	-0.146468	0.0687861
SWIS7	-0.173529	-0.242591	-0.255462	-0.250018	-0.233743	-0.196906	-0.218484				0.397986	0.0530554	-0.0213068	-0.0650977	-0.157596	0.109585
SWIS8	-0.236768	-0.137622	-0.164755	-0.258999	-0.212466	-0.220712	-0.173055				-0.418747	0.19715	0.572029	-0.179663	0.0388107	-0.215924
SWIS9	-0.725268	-0.717769	-0.75922	-0.750554	-0.690333	-0.71747	-0.694507				-0.0103391	0.0577499	-0.0114145	-0.0802355	0.0393092	-0.0320048
SWIS10	-0.105936	-0.210603	-0.230445	-0.199963	-0.18148	-0.155564	-0.161715				0.988028	0.0942122	-0.132275	-0.0924305	-0.142805	0.0395394
SWIS11	-0.115748	-0.199606	-0.217802	-0.220874	-0.208241	-0.176343	-0.200092				0.724492	0.0911601	0.0141054	-0.0571963	-0.153179	0.134675
SWIS12	-0.0723328	-0.247858	-0.266058	-0.495545	-0.437961	-0.52088	-0.451308				2.42664	0.0734278	0.862543	-0.116203	0.189329	-0.133567
SWIS13	0.0493337	-0.190958	-0.22948	-0.371973	-0.333962	-0.216941	-0.282543				-4.87075	0.201728	0.620942	-0.102189	-0.3504	0.302394
SWIS14	0.122135	-0.145455	-0.184203	-0.169256	-0.235699	-0.364468	-0.28681				-2.19094	0.266393	-0.0811472	0.392559	0.54633	-0.213073
SWIS15	-0.109068	-0.211845	-0.233279	-0.221807	-0.196014	-0.181331	-0.199173				0.942321	0.101177	-0.049177	-0.116287	-0.0749069	0.0983956
SWIS16	-0.0955729	-0.200194	-0.218974	-0.18713	-0.407413	-0.456601	-0.330006				1.09467	0.0938096	-0.145424	1.17716	0.120734	-0.277255
SWIS17	-0.590535	-0.539605	-0.290416	-0.429906	-0.511372	-0.300759	-0.282723				-0.0862453	-0.461798	0.480311	0.189497	-0.411859	-0.0599689
SWIS18	0.222196	-0.132712	-0.180585	-0.146816	-0.20938	-0.135004	-0.283244				-1.59728	0.360729	-0.186999	0.426138	-0.355218	1.09803
SWIS19	-0.169192	-0.264383	-0.279843	-0.243375	-0.22046	-0.188841	-0.251648				0.562622	0.0584749	-0.130315	-0.0941563	-0.143423	0.332596
SWIS20	0.329578	-0.0943833	-0.140261	-0.117748	-0.185377	-0.115412	-0.291253				-1.28638	0.48608	-0.160511	0.574361	-0.37742	1.52359
SWIS21	-0.116603	-0.376319	-0.40322	-0.381641	-0.371264	-0.319007	-0.391847				2.22735	0.0714834	-0.0535167	-0.0271889	-0.140754	0.228333
SWIS22	0.1071	-0.150002	-0.170046	-0.181572	-0.196146	-0.140572	-0.202574				-2.40059	0.133621	0.067783	0.0802677	-0.283332	0.44107
SWIS23	0.0365472	-0.2369	-0.265071	-0.271086	-0.258737	-0.219651	-0.277982				-7.48204	0.118916	0.0226905	-0.045554	-0.151065	0.265561
SWIS24	-0.106972	-0.189651	-0.214865	-0.200167	-0.175201	-0.226746	-0.268144				0.772901	0.132948	-0.0684067	-0.124724	0.294201	0.182576
SWIS25	-0.0940524	-0.182917	-0.209778	-0.235757	-0.143206	-0.217256	-0.240192				0.944843	0.146847	0.123838	-0.39257	0.517093	0.105571
SWIS26	-0.136459	-0.338895	-0.370811	-0.365631	-0.363624	-0.309248	-0.383024				1.48349	0.0941772	-0.0139703	-0.00548898	-0.149539	0.238565
SWIS27	-0.0362055	-0.233112	-0.24081	-0.304474	-0.294571	-0.239654	-0.287948				5.43856	0.0330256	0.264374	-0.0325255	-0.18643	0.201515
SWIS28	0.0893734	-0.340851	-0.388865	-0.352768	-0.31303	-0.244552	-0.369954				-4.81378	0.140867	-0.0928271	-0.112646	-0.21876	0.512785
SWIS29	-0.0051208	-0.15916	-0.188358	-0.1867	-0.233819	-0.159812	-0.279305				30.0811	0.183449	-0.00880366	0.252381	-0.316515	0.747714
SWIS30	-0.120598	-0.491633	-0.530854	-0.494281	-0.463218	-0.395647	-0.49193				3.07661	0.0797755	-0.068894	-0.0628442	-0.145873	0.243355
SWIS31	-0.0437715	-0.330205	-0.36556	-0.34105	-0.319458	-0.256968	-0.365725				6.54383	0.107069	-0.0670477	-0.0633102	-0.195612	0.423231
SWIS32	-0.126185	-0.228859	-0.236474	-0.232272	-0.196271	-0.156767	-0.18717				0.813675	0.0332767	-0.0177719	-0.154992	-0.201272	0.193933
SWIS33	0.0768646	-0.235838	-0.257462	-0.235121	-0.284999	-0.222177	-0.3043				-4.06823	0.0916903	-0.0867743	0.212136	-0.22043	0.369631
SWIS34	-0.150869	-0.354586	-0.389773	-0.372259	-0.377474	-0.322785	-0.393137				1.35029	0.099234	-0.0449333	0.0140085	-0.14488	0.217952
SWIS35											#DIV/0!	#DIV/0!	#DIV/0!	#DIV/0!	#DIV/0!	#DIV/0!
PRCS1	0.759122	0.810063	0.656413	0.758429	0.736161	0.684165	0.662842				0.067105	-0.189677	0.155414	-0.0293604	-0.0706309	-0.0311664
PRCS2	0.657621	0.615921	0.490013	0.639462	0.536679	0.466636	0.469939				-0.0634116	-0.204421	0.304989	-0.160733	-0.130513	0.00707967
PRCS3	0.837402	0.858951	0.767374	0.823552	0.821505	0.785667	0.773244				0.0257333	-0.106615	0.0732084	-0.00248637	-0.0436246	-0.0158125
PRCS4	0.712867	0.76373	0.606878	0.706772	0.692002	0.636644	0.614328				0.0713506	-0.205377	0.164602	-0.0208968	-0.0799974	-0.0350521
PRCS5	0.579581	0.622172	0.435134	0.516835	0.542001	0.462443	0.445169				0.0734843	-0.300621	0.187762	0.0486916	-0.146786	-0.0373528
PRCS6	0.612107	0.685979	0.4996	0.61724	0.550819	0.475514	0.453824				0.120685	-0.271697	0.235468	-0.10761	-0.136714	-0.0456131
PRCS7	0.532587	0.690129	0.477278	0.551431	0.525498	0.43642	0.418508				0.295805	-0.308423	0.155367	-0.0470289	-0.16951	-0.0410449
PRCS8	0.692082	0.699544	0.304621	0.659669	0.420294	0.33696	0.23667				0.0107824	-0.564543	1.16554	-0.362871	-0.198277	-0.297631
PRCS9	0.729429	0.853474	0.62927	0.745234	0.692614	0.630256	0.602946				0.170058	-0.262695	0.184283	-0.0706084	-0.0900334	-0.0433306
PRCS10	0.703726	0.85409	0.600906	0.706026	0.674347	0.607295	0.58305				0.213668	-0.296437	0.174936	-0.04487	-0.0994331	-0.0399221
PRCS11	0.661324	0.64404	0.506957	0.647565	0.614865	0.532531	0.521851				-0.0261352	-0.212848	0.277357	-0.0504972	-0.133906	-0.0200541
PRCS12	0.745808	0.763065	0.616687	0.731859	0.667776	0.579313	0.5502				0.0231392	-0.191829	0.186758	-0.0875607	-0.132474	-0.0502548
PRCS13	0.751649	0.788576	0.642925	0.730846	0.714422	0.636706	0.618409				0.0491293	-0.184701	0.136752	-0.0224733	-0.108782	-0.0287364
PRCS14	0.783086	0.81506	0.675797	0.773827	0.753621	0.691867	0.675236				0.0408311	-0.170862	0.145058	-0.0261122	-0.081942	-0.0240388
PRCS15	0.740802	0.771472	0.618679	0.714879	0.678478	0.595106	0.584411				0.0414013	-0.198054	0.155492	-0.0509194	-0.122881	-0.0179708
PRCS16	0.48814	0.51229	0.320285	0.56067	0.566954	0.458253	0.447957				0.0494746	-0.374799	0.750535	0.0112093	-0.191729	-0.0224681
PRCS17	0.714587	0.726277	0.601021	0.677645	0.657742	0.590315	0.584005				0.0163581	-0.172463	0.12749	-0.0293712	-0.102513	-0.0106882
PRCS18	0.879807	0.891868	0.839922	0.880712	0.869695	0.837062	0.827298				0.0137093	-0.0582445	0.0485639	-0.0125093	-0.037522	-0.0116642
PRCS19											#DIV/0!	#DIV/0!	#DIV/0!	#DIV/0!	#DIV/0!	#DIV/0!
PRCS20	0.748904	0.801988	0.653136	0.77609	0.721379	0.659124	0.661946				0.0708824	-0.185604	0.188253	-0.0704963	-0.0863003	0.00428255
PRCS21	0.583676	0.676525	0.60554	0.735623	0.671334	0.600496	0.606032				0.159077	-0.104926	0.214822	-0.0873939	-0.105519	0.00921837
PRCS22	0.754321	0.813421	0.692044	0.747043	0.75957	0.705249	0.704273				0.0783494	-0.149218	0.0794736	0.0167678	-0.0715156	-0.00138275
PRCS23	0.636605	0.758459	0.618643	0.728851	0.688827	0.621959	0.61493				0.191411	-0.184342	0.178145	-0.054914	-0.0970754	-0.0113004
PRCS24	0.414556	0.552684	0.263365	0.448477	0.409385	0.322447	0.337947				0.333196	-0.52348	0.702869	-0.0871649	-0.212364	0.0480707
PRCS25	0.402004	0.489569	0.153104	0.338205	0.239819	0.105369	0.141172				0.217822	-0.687268	1.20899	-0.290904	-0.560631	0.339786
PRCS26	0.407083	0.595749	0.419902	0.62827	0.574322	0.495955	0.49874				0.463457	-0.29517	0.496231	-0.0858677	-0.136452	0.00561564
PRCS27	0.57264	0.642408	0.481631	0.617515	0.618966	0.529843	0.533745				0.121836	-0.250273	0.282134	0.00235004	-0.143988	0.0073649
PRCS28	0.681184	0.762643	0.711133	0.77723	0.712585	0.645071	0.64885				0.119584	-0.0675424	0.092946	-0.0831728	-0.094745	0.00585737
PRCS29	0.586848	0.750106	0.673224	0.76	0.705996	0.629545	0.62388				0.278194	-0.102495	0.128895	-0.0710581	-0.108287	-0.0089995
PRCS30	0.737687	0.781197	0.700753	0.808635	0.746551	0.686862	0.688373				0.0589817	-0.102974	0.153951	-0.0767769	-0.0799524	0.00219927
PRCS31	0.697188	0.775052	0.691193	0.6673	0.70321	0.638816	0.643858				0.111682	-0.108198	-0.0345679	0.0538146	-0.0915713	0.00789269
PRCS32	0.594159	0.715803	0.59035	0.573378	0.557044	0.471684	0.477398				0.204733	-0.175262	-0.0287496	-0.0284871	-0.153238	0.0121152
PRCS33	0.726136	0.88484	0.690837	0.741217	0.716482	0.660685	0.640684				0.21856	-0.219252	0.0729269	-0.0333711	-0.0778758	-0.0302737
PRCS34	0.581914	0.753703	0.529386	0.626896	0.581525	0.490836	0.479822				0.295215	-0.29762	0.184195	-0.0723742	-0.155951	-0.0224383
PRCS35											#DIV/0!	#DIV/0!	#DIV/0!	#DIV/0!	#DIV/0!	#DIV/0!
CYPS1	-0.386035	-0.12236	-0.0788477	-0.116878	-0.0923261	-0.0793537	-0.221251				-0.683035	-0.355607	0.482325	-0.210064	-0.140507	1.78816
CYPS2	-0.416014	-0.255183	-0.230148	-0.259166	-0.210626	-0.23722	-0.232323				-0.386599	-0.0981076	0.126085	-0.187295	0.126266	-0.0206453
CYPS3	-0.271104	0.0731258	0.161774	0.0811011	0.107445	0.130649	-0.0836458				-1.26973	1.21227	-0.498676	0.324829	0.215958	-1.64023
CYPS4	-0.186633	-0.123797	-0.158323	-0.151759	-0.158041	-0.181225	-0.130644				-0.336683	0.278894	-0.0414607	0.0413943	0.146698	-0.27911
CYPS5	-0.104157	-0.0988569	-0.152824	-0.154751	-0.137049	-0.1639	-0.1457				-0.0508813	0.545914	0.0126078	-0.114392	0.195925	-0.11104
CYPS6	-0.448105	-0.338183	-0.302919	-0.339407	-0.311729	-0.309737	-0.308407				-0.245304	-0.104275	0.120457	-0.0815491	-0.00639118	-0.0042939
CYPS7	-0.565324	-0.431412	-0.295101	-0.383092	-0.496763	-0.494926	-0.494485				-0.236877	-0.315964	0.298172	0.296719	-0.00369732	-0.000890964
CYPS8	-0.15534	-0.0944049	-0.117678	-0.124407	-0.110507	-0.127004	-0.116923				-0.39227	0.246523	0.0571829	-0.111729	0.149284	-0.0793766
CYPS9	-0.43202	-0.289368	-0.300321	-0.321716	-0.281989	-0.283773	-0.374449				-0.330199	0.0378539	0.0712383	-0.123483	0.00632685	0.319537
CYPS10	-0.267429	-0.246635	-0.251164	-0.257788	-0.252844	-0.312797	-0.285779				-0.0777543	0.0183621	0.0263735	-0.0191784	0.237113	-0.0863755
CYPS11	-0.351145	-0.311256	-0.376273	-0.34879	-0.365028	-0.417276	-0.396155				-0.113594	0.208884	-0.073039	0.0465541	0.143134	-0.0506164
CYPS12	-0.725192	-0.42338	-0.533242	-0.512556	-0.489902	-0.500123	-0.466146				-0.416181	0.259488	-0.0387937	-0.0441976	0.0208632	-0.0679379
CYPS13	-0.331239	-0.228152	-0.316088	-0.278556	-0.256209	-0.278031	-0.24271				-0.311217	0.385429	-0.118738	-0.080226	0.0851727	-0.12704
CYPS14	-0.181602	-0.208435	-0.276335	-0.293943	-0.272985	-0.25603	-0.258204				0.147759	0.325759	0.0637213	-0.0712994	-0.0621108	0.00849216
CYPS15	-0.0843552	-0.107171	-0.131327	-0.143128	-0.123683	-0.133322	-0.130273				0.270471	0.225404	0.0898578	-0.135858	0.0779343	-0.0228703
CYPS16	-0.280303	-0.170487	-0.202066	-0.206888	-0.182771	-0.197181	-0.174479				-0.391776	0.185225	0.0238638	-0.116567	0.0788402	-0.115134
CYPS17	-0.853504	-0.527354	-0.604783	-0.621926	-0.655487	-0.710406	-0.725895				-0.382131	0.146827	0.0283457	0.0539623	0.0837842	0.0218035
CYPS18	-0.608252	-0.477342	-0.501879	-0.546969	-0.487703	-0.517085	-0.465956				-0.215222	0.0514024	0.0898419	-0.108353	0.0602451	-0.0988788
CYPS19	-0.362089	-0.279273	-0.294965	-0.30272	-0.278782	-0.277071	-0.262001				-0.228717	0.0561865	0.0262913	-0.079075	-0.00613624	-0.0543909
CYPS20	-0.65685	-0.470565	-0.371347	-0.467199	-0.401995	-0.40084	-0.421167				-0.283604	-0.210849	0.25812	-0.139564	-0.00287268	0.0507102
CYPS21	-0.592881	-0.369699	-0.267674	-0.36781	-0.300083	-0.309835	-0.290269				-0.376437	-0.275968	0.374098	-0.184135	0.0324964	-0.0631502
CYPS22	-0.228886	0.111949	-0.0129586	-0.0658375	-0.0924257	-0.0650289	-0.0122041				-1.4891	-1.11576	4.08059	0.403845	-0.296419	-0.812329
CYPS23	-0.499972	-0.409448	-0.374565	-0.437911	-0.371993	-0.379429	-0.395417				-0.181057	-0.0851962	0.16912	-0.150529	0.019991	0.0421354
CYPS24	-0.522204	-0.414303	-0.392772	-0.472395	-0.523807	-0.542019	-0.503066				-0.206627	-0.0519695	0.20272	0.108833	0.0347696	-0.0718673
CYPS25	-0.565591	-0.195693	-0.205685	-0.210948	-0.24496	-0.289981	-0.287439				-0.654004	0.05106	0.0255887	0.161235	0.183789	-0.00876678
CYPS26	-0.589777	-0.562537	-0.360222	-0.610582	-0.643457	-0.666052	-0.626644				-0.0461875	-0.359648	0.695018	0.0538421	0.0351141	-0.0591664
CYPS27	-0.594445	-0.431374	-0.392458	-0.452671	-0.398962	-0.396955	-0.399227				-0.274326	-0.0902144	0.153426	-0.118648	-0.00503143	0.00572408
CYPS28	-0.659078	-0.414232	-0.573384	-0.602274	-0.557079	-0.660942	-0.522003				-0.371498	0.38421	0.0503851	-0.0750405	0.186442	-0.210213
CYPS29	-0.641965	-0.419035	-0.403181	-0.447919	-0.400985	-0.415358	-0.386574				-0.347262	-0.0378349	0.110963	-0.104782	0.0358431	-0.0692996
CYPS30	-0.486121	-0.704869	-0.593811	-0.721086	-0.731092	-0.787556	-0.659909				0.449985	-0.157558	0.214335	0.0138766	0.0772323	-0.16208
CYPS31	-0.606856	-0.361242	-0.368248	-0.410541	-0.369639	-0.460599	-0.452572				-0.404731	0.0193941	0.114847	-0.0996276	0.246076	-0.0174264
CYPS32	-0.270381	-0.360628	-0.39004	-0.437981	-0.393165	-0.399981	-0.367716				0.33378	0.0815564	0.122913	-0.102324	0.0173386	-0.080668
CYPS33	-0.476005	-0.279277	-0.20839	-0.265057	-0.220097	-0.215588	-0.203441				-0.41329	-0.253823	0.271928	-0.169625	-0.0204859	-0.0563418
CYPS34	-0.508669	-0.383624	-0.278038	-0.324837	-0.290821	-0.42116	-0.40368				-0.245829	-0.275233	0.16832	-0.104715	0.448174	-0.0415053
CYPS35											#DIV/0!	#DIV/0!	#DIV/0!	#DIV/0!	#DIV/0!	#DIV/0!
CZES1	-0.0355104	0.0242566	0.0179113	0.225015	0.241461	0.241527	0.281654				-1.68309	-0.261589	11.5627	0.0730854	0.000272634	0.166142
CZES2	-0.161444	-0.141009	-0.147861	-0.0814266	-0.0365547	-0.0800867	0.00591183				-0.12658	0.0485969	-0.449305	-0.551072	1.19087	-1.07382
CZES3	0.164043	0.145924	0.179408	0.382426	0.370782	0.374494	0.421934				-0.110454	0.229463	1.13159	-0.0304474	0.0100107	0.126679
CZES4	-0.3711	-0.230592	-0.214407	-0.116251	-0.0731305	-0.0654677	0.00220598				-0.378627	-0.0701877	-0.457801	-0.370927	-0.104782	-1.0337
CZES5	-0.115755	-0.0958302	-0.0835143	-0.0926642	-0.0844639	-0.0858024	-0.0964129				-0.17213	-0.128518	0.109561	-0.0884952	0.0158481	0.123662
CZES6	-0.0779867	-0.0229991	-0.0389828	0.114217	0.152448	0.137101	0.177734				-0.70509	0.694971	-3.92992	0.334726	-0.100672	0.296378
CZES7	-0.43466	-0.376981	-0.393109	-0.313488	-0.104724	-0.0877481	-0.0387166				-0.132699	0.0427815	-0.202541	-0.665938	-0.162105	-0.558776
CZES8	-0.365769	-0.260319	-0.264623	-0.147473	-0.249387	-0.260861	-0.243299				-0.288297	0.0165347	-0.442706	0.691068	0.0460093	-0.0673214
CZES9	-0.413756	-0.477169	-0.321217	-0.243509	-0.399782	-0.490946	-0.584875				0.153262	-0.326828	-0.241918	0.641753	0.228034	0.191323
CZES10	-0.642576	-0.436814	-0.391906	-0.360545	-0.370724	-0.347194	-0.403495				-0.320215	-0.102807	-0.0800227	0.0282332	-0.0634709	0.16216
CZES11	-0.180132	-0.11088	-0.126501	-0.0804125	-0.0715599	-0.114634	0.0283963				-0.384451	0.140886	-0.364335	-0.110089	0.601936	-1.24771
CZES12	-0.670785	-0.582057	-0.541144	-0.50728	-0.530801	-0.517353	-0.395459				-0.132275	-0.0702905	-0.0625788	0.0463687	-0.0253357	-0.23561
CZES13	-0.495322	-0.335381	-0.276189	-0.264705	-0.334555	-0.343526	-0.199236				-0.322903	-0.176492	-0.04158	0.263878	0.0268149	-0.420027
CZES14	-0.841352	-0.673898	-0.666468	-0.653899	-0.702491	-0.735945	-0.692752				-0.199029	-0.0110257	-0.01886	0.0743119	0.0476214	-0.0586896
CZES15	-0.721215	-0.708831	-0.680975	-0.680528	-0.662606	-0.67679	-0.654572				-0.0171708	-0.0392986	-0.000656236	-0.0263361	0.0214067	-0.0328288
CZES16	-0.110045	-0.12091	-0.130929	-0.0319695	-0.0132242	-0.0194303	0.0612649				0.0987357	0.0828602	-0.755824	-0.586349	0.469294	-4.15306
CZES17	-0.73721	-0.492746	-0.45559	-0.395521	-0.521975	-0.5744	-0.105084				-0.331608	-0.0754063	-0.131849	0.319717	0.100435	-0.817054
CZES18	0.0105091	0.0573055	0.0797668	0.400164	0.421919	0.436854	0.52047				4.45296	0.391958	4.01667	0.0543635	0.0353998	0.191403
CZES19	-0.4492	-0.439337	-0.451509	-0.426476	-0.428239	-0.41591	-0.400148				-0.0219574	0.0277071	-0.0554445	0.00413365	-0.0287891	-0.0378982
CZES20	-0.102817	-0.185533	-0.172934	0.12993	0.16763	0.173394	0.260574				0.804497	-0.0679074	-1.75132	0.290161	0.0343819	0.502789
CZES21	-0.0503315	-0.0265946	-0.00781973	0.301605	0.328123	0.285597	0.381743				-0.471612	-0.705965	-39.5698	0.0879217	-0.129602	0.336646
CZES22	0.0425084	0.00427921	0.0135784	0.160905	0.18071	0.214597	0.346134				-0.899333	2.17311	10.8501	0.123087	0.18752	0.612949
CZES23	-0.249355	0.111888	0.102313	0.280479	0.250582	0.225462	0.353863				-1.44871	-0.0855813	1.74139	-0.106591	-0.100249	0.569502
CZES24	-0.0771406	-0.090799	-0.103128	-0.0964277	-0.0811207	-0.0882765	-0.084381				0.177059	0.135784	-0.0649705	-0.158741	0.088212	-0.0441291
CZES25	-0.212598	-0.119712	-0.124406	-0.0888832	-0.0337258	-0.062321	0.0480501				-0.436908	0.0392103	-0.285542	-0.62056	0.847871	-1.77101
CZES26	-0.0649308	-0.00292049	0.00976128	0.218903	0.261952	0.131882	0.344949				-0.955021	-4.34234	21.4256	0.19666	-0.496543	1.6156
CZES27	-0.217445	-0.226352	-0.230885	-0.122992	-0.0681961	-0.0652821	0.00629597				0.0409637	0.0200238	-0.467302	-0.445523	-0.0427295	-1.09644
CZES28	-0.201186	-0.220492	-0.210478	0.0718593	0.117125	0.121262	0.198176				0.095966	-0.045419	-1.34141	0.629929	0.0353141	0.634282
CZES29	0.0493538	0.0930923	0.116992	0.412251	0.420841	0.334955	0.473651				0.886225	0.256734	2.52374	0.0208386	-0.204082	0.414073
CZES30	-0.272937	-0.282308	-0.267455	0.115399	0.137662	0.161206	0.245418				0.0343373	-0.0526139	-1.43147	0.192927	0.171027	0.522381
CZES31	-0.183265	-0.193305	-0.190569	0.114672	0.110565	0.11195	0.193706				0.0547861	-0.0141554	-1.60173	-0.0358133	0.0125274	0.730286
CZES32	-0.19188	-0.189541	-0.188802	-0.0436454	-0.00772847	-0.0258811	0.0382629				-0.0121868	-0.00390038	-0.76883	-0.822926	2.3488	-2.47841
CZES33	-0.346776	-0.191795	-0.190654	0.0141446	0.0315955	-0.0605322	0.0944076				-0.446918	-0.00595058	-1.07419	1.23374	-2.91585	-2.55963
CZES34	-0.225917	-0.244526	-0.236281	0.00636445	0.0237043	0.0350853	0.120515				0.0823715	-0.0337197	-1.02694	2.72448	0.480125	2.43491
CZES35											#DIV/0!	#DIV/0!	#DIV/0!	#DIV/0!	#DIV/0!	#DIV/0!
GERS1	0.0595516	0.116939	0.28677	0.423319	0.305669	0.273981	0.220576				0.963661	1.4523	0.476163	-0.277923	-0.103668	-0.194923
GERS2	-0.0808075	-0.0701545	-0.0310353	0.0442453	0.0124207	0.0162415	0.0337161				-0.131832	-0.557615	-2.42564	-0.719276	0.307609	1.07593
GERS3	0.386254	0.41218	0.30205	0.671206	0.574272	0.555342	0.538384				0.0671214	-0.26719	1.22217	-0.144416	-0.0329646	-0.0305361
GERS4	-0.0664785	-0.0312964	0.0749536	0.132584	0.0560319	0.0445039	0.0318301				-0.529225	-3.39496	0.768882	-0.577386	-0.20574	-0.284778
GERS5	-0.0588812	-0.056313	-0.048525	-0.018396	-0.0120592	-0.0289235	-0.0310685				-0.0436165	-0.138298	-0.620896	-0.344468	1.39847	0.0741594
GERS6	-0.0500208	-0.0278895	0.0657997	0.14361	0.0929359	0.085608	0.0640465				-0.442442	-3.3593	1.18253	-0.352857	-0.0788489	-0.251864
GERS7	0.0869554	0.17967	0.373432	0.47491	0.357863	0.322956	0.318434				1.06624	1.07843	0.271745	-0.246462	-0.0975422	-0.0140037
GERS8	-0.511385	-0.631061	-0.662677	-0.281594	-0.555646	-0.365022	-0.6728				0.234022	0.0501001	-0.575065	0.973214	-0.343066	0.843174
GERS9	0.216692	0.260828	0.310179	0.0967382	-0.0475511	-0.0643692	0.384915				0.203684	0.189208	-0.688121	-1.49154	0.353685	-6.97979
GERS10	0.0366494	0.091837	0.246694	0.22602	0.112898	0.199044	0.265904				1.50583	1.68621	-0.0838033	-0.500496	0.763048	0.335906
GERS11	-0.027041	0.0527564	0.229432	0.344309	0.230661	0.197719	0.192641				-2.95098	3.34889	0.500704	-0.330078	-0.142813	-0.025686
GERS12	0.181427	0.23952	0.469549	0.360483	0.404028	0.244995	0.389124				0.320201	0.96037	-0.232277	0.120795	-0.393619	0.588297
GERS13	0.388663	0.435136	0.580392	0.518651	0.45131	0.256539	0.442231				0.119572	0.333819	-0.106379	-0.129839	-0.431568	0.723835
GERS14	0.0347151	-0.0833527	-0.0972304	0.140411	-0.200078	-0.315603	-0.20264				-3.40105	0.166494	-2.4441	-2.42495	0.577396	-0.357927
GERS15	0.464262	0.0934519	0.320649	0.210317	0.329806	0.184769	0.52011				-0.798709	2.43116	-0.34409	0.56814	-0.439763	1.81491
GERS16	-0.0165058	0.0732822	0.192015	0.331906	0.209864	0.197042	0.195521				-5.43977	1.62021	0.728546	-0.367702	-0.0610964	-0.00771607
GERS17	0.0724067	0.133715	0.407769	0.516435	0.193934	0.383332	0.0879393				0.846726	2.04953	0.26649	-0.624475	0.976612	-0.770593
GERS18	0.436547	0.486273	0.595811	0.658665	0.521869	0.463213	0.468328				0.113908	0.225261	0.105493	-0.207686	-0.112396	0.0110419
GERS19	0.086995	0.148356	0.283631	0.322433	0.187126	0.161528	0.153131				0.705344	0.911823	0.136803	-0.419642	-0.136796	-0.0519872
GERS20	0.334181	0.437438	0.591719	0.675249	0.602397	0.586673	0.557628				0.308987	0.352691	0.141166	-0.10789	-0.0261012	-0.0495088
GERS21	0.334455	0.38384	0.559704	0.635765	0.529057	0.500327	0.473399				0.147659	0.458171	0.135895	-0.167842	-0.0543045	-0.0538209
GERS22	0.310934	0.337742	0.305228	0.443401	0.314692	0.369013	0.339881				0.0862183	-0.0962668	0.452684	-0.290275	0.172614	-0.0789451
GERS23	0.198021	0.27175	0.440623	0.533171	0.432196	0.426226	0.393191				0.372332	0.621426	0.210039	-0.189386	-0.0138124	-0.0775052
GERS24	0.0841744	0.145042	0.259452	0.377091	0.274144	0.268697	0.236218				0.723113	0.788804	0.453415	-0.273004	-0.0198665	-0.120878
GERS25	0.033072	0.0554176	0.204978	0.200279	0.174109	0.16959	0.1542				0.675666	2.69879	-0.0229246	-0.130669	-0.0259569	-0.0907497
GERS26	0.216768	0.301849	0.477211	0.559098	0.466864	0.455824	0.41486				0.392495	0.580961	0.171595	-0.164969	-0.0236474	-0.0898691
GERS27	0.115719	0.221437	0.403396	0.517114	0.417008	0.397056	0.36763				0.913565	0.82172	0.281902	-0.193586	-0.0478444	-0.0741101
GERS28	0.299893	0.363775	0.558674	0.659824	0.57589	0.546967	0.524276				0.213016	0.535768	0.181054	-0.127207	-0.0502226	-0.0414853
GERS29	0.456933	0.513154	0.632535	0.690083	0.597511	0.564887	0.551652				0.12304	0.232641	0.0909801	-0.134146	-0.0545999	-0.0234286
GERS30	0.228644	0.34512	0.556442	0.661399	0.578542	0.547406	0.530381				0.509421	0.612317	0.188621	-0.125275	-0.0538179	-0.0311024
GERS31	0.152137	0.249357	0.472232	0.592252	0.486077	0.450079	0.430629				0.639031	0.893799	0.254155	-0.179274	-0.0740576	-0.0432152
GERS32	0.0581206	0.127176	0.302503	0.423843	0.323039	0.293603	0.26188				1.18813	1.37863	0.401118	-0.237834	-0.091122	-0.108045
GERS33	0.267928	0.342776	0.500908	0.595101	0.558435	0.520052	0.497984				0.279359	0.461329	0.188045	-0.0616126	-0.0687339	-0.0424352
GERS34	0.177158	0.218593	0.470596	0.582211	0.491179	0.468713	0.449689				0.233887	1.15284	0.237179	-0.156356	-0.0457382	-0.040588
GERS35											#DIV/0!	#DIV/0!	#DIV/0!	#DIV/0!	#DIV/0!	#DIV/0!
DENS1	-0.116578	-0.0676624	0.173852	0.0375995	-0.108057	-0.107105	-0.13586				-0.419593	-3.5694	-0.783727	-3.87388	-0.00880647	0.268479
DENS2	-0.124433	-0.172699	-0.0867842	-0.136762	-0.168531	-0.161135	-0.180502				0.387886	-0.497481	0.575884	0.232296	-0.0438884	0.120191
DENS3	-0.416284	-0.0568559	-0.152289	0.106703	-0.0391565	0.044772	0.0460015				-0.863421	1.67851	-1.70066	-1.36697	-2.14341	0.0274594
DENS4	-0.133456	-0.108879	-0.0729367	-0.096698	-0.122648	-0.11429	-0.146923				-0.184161	-0.330111	0.32578	0.26836	-0.0681419	0.285526
DENS5	-0.077416	-0.0211637	-0.0163194	-0.0213358	-0.021751	-0.0222422	-0.026862				-0.726623	-0.228897	0.30739	0.0194592	0.0225836	0.207702
DENS6	-0.186464	-0.104629	-0.0821399	-0.106438	-0.155914	-0.159953	-0.176782				-0.438877	-0.214942	0.295809	0.464842	0.0259034	0.105211
DENS7	-0.183484	-0.0818371	-0.0384361	-0.124792	-0.195521	-0.176536	-0.221073				-0.553982	-0.530335	2.24674	0.566778	-0.0971029	0.252288
DENS8	-0.13195	0.0921238	-0.249594	0.0562471	0.0270131	0.0343105	-0.323834				-1.69817	-3.70933	-1.22535	-0.519743	0.270144	-10.4383
DENS9	-0.440599	-0.0870157	-0.0150232	-0.0247495	-0.193756	-0.215518	-0.263037				-0.802506	-0.827351	0.647423	6.82868	0.112318	0.220485
DENS10	-0.479056	-0.110686	-0.156383	-0.108079	-0.135503	-0.140344	-0.151963				-0.768949	0.412847	-0.308881	0.253743	0.0357216	0.0827952
DENS11	-0.186334	-0.0917087	-0.07715	-0.0892782	-0.15714	-0.160151	-0.182025				-0.507827	-0.158749	0.157202	0.760119	0.0191622	0.136583
DENS12	-0.524218	-0.150513	-0.18201	-0.0480221	-0.143335	-0.157928	-0.265213				-0.712881	0.209261	-0.736156	1.98477	0.101807	0.679332
DENS13	-0.381185	-0.118856	-0.167501	-0.0215218	0.00644442	-0.00997267	-0.0779018				-0.688193	0.409278	-0.871512	-1.29944	-2.54749	6.81154
DENS14	-0.449128	-0.133101	-0.195177	-0.0636488	-0.155602	-0.159561	-0.182244				-0.703647	0.466386	-0.673891	1.4447	0.0254394	0.142164
DENS15	-0.244043	-0.105816	-0.0733893	-0.105262	-0.131852	-0.138734	-0.149444				-0.566403	-0.306445	0.434297	0.252609	0.0521922	0.0771981
DENS16	-0.186836	-0.0811662	-0.0688251	-0.083377	-0.1544	-0.158407	-0.178931				-0.565574	-0.152048	0.211433	0.851832	0.0259493	0.129569
DENS17	-0.200357	-0.184105	0.100123	-0.0363366	-0.10688	-0.0634058	-0.0604947				-0.0811167	-1.54384	-1.36292	1.94139	-0.406757	-0.0459111
DENS18	-0.686171	-0.0908648	0.473321	0.400202	0.220286	0.139777	0.107091				-0.867577	-6.20907	-0.15448	-0.449564	-0.365475	-0.23384
DENS19	-0.191959	-0.0744667	-0.0361803	-0.0654959	-0.154731	-0.158887	-0.184044				-0.612071	-0.514141	0.810264	1.36246	0.0268595	0.158332
DENS20	-0.050287	0.234181	0.300501	0.296312	0.0785704	0.0274934	-0.0859018				-5.65689	0.2832	-0.0139398	-0.734839	-0.650079	-4.12445
DENS21	-0.333023	-0.0166052	0.385533	0.206382	0.0406549	0.0287453	-0.0261281				-0.950138	-24.2176	-0.464683	-0.803012	-0.292943	-1.90895
DENS22	-0.315667	-0.115458	-0.0786547	0.0664133	-0.00133943	-0.00267273	-0.0603241				-0.634241	-0.31876	-1.84437	-1.02017	0.995419	21.5702
DENS23	-0.333265	-0.225098	-0.521354	-0.138922	-0.261682	-0.325386	-0.287827				-0.324567	1.31612	-0.733536	0.883661	0.243439	-0.115429
DENS24	-0.76023	-0.657596	-0.736645	-0.772866	-0.813391	-0.814721	-0.825316				-0.135004	0.120208	0.0491707	0.0524353	0.00163501	0.0130044
DENS25	-0.508091	-0.0923593	-0.0262435	-0.097139	-0.180113	-0.18453	-0.18615				-0.818223	-0.715854	2.70145	0.854174	0.0245244	0.00878231
DENS26	-0.216296	0.0214022	0.144168	-0.0839708	-0.233325	-0.255288	-0.272261				-1.09895	5.73611	-1.58245	1.77865	0.0941281	0.0664844
DENS27	-0.210744	-0.058837	0.0672931	-0.0710601	-0.238317	-0.248221	-0.272197				-0.720813	-2.14372	-2.05598	2.35374	0.0415558	0.0965942
DENS28	-0.204638	-0.0126964	0.150363	-0.0631246	-0.228197	-0.246672	-0.270666				-0.937957	-12.8429	-1.41981	2.61503	0.0809583	0.0972706
DENS29	-0.425085	0.0531722	0.489186	0.395536	0.241989	0.188457	0.188616				-1.12509	8.20003	-0.191439	-0.388202	-0.221215	0.000840707
DENS30	-0.223583	0.0767416	0.252738	0.01383	-0.268037	-0.30065	-0.327323				-1.34324	2.29336	-0.945279	-20.3809	0.121674	0.0887165
DENS31	-0.211573	-0.00843283	0.169379	-0.0405103	-0.200553	-0.231862	-0.262673				-0.960142	-21.0857	-1.23917	3.95067	0.156116	0.132883
DENS32	-0.203004	-0.0202336	0.102452	-0.0788256	-0.23455	-0.253315	-0.272252				-0.900329	-6.06347	-1.76939	1.97555	0.0800062	0.0747565
DENS33	-0.177949	0.049959	0.142667	-0.00114691	-0.176109	-0.221402	-0.243232				-1.28075	1.85569	-1.00804	152.551	0.257189	0.0985959
DENS34	-0.156742	0.093624	0.2282	0.0306159	-0.182214	-0.215786	-0.226186				-1.59731	1.43741	-0.865838	-6.95162	0.184249	0.048194
DENS35											#DIV/0!	#DIV/0!	#DIV/0!	#DIV/0!	#DIV/0!	#DIV/0!
SPAS1	0.220957	0.528763	0.46643	0.589539	0.443402	0.270317	0.418788				1.39305	-0.117883	0.263939	-0.247885	-0.390357	0.54925
SPAS2	-0.224856	-0.0818352	-0.0821805	0.0117225	-0.099346	-0.258419	-0.107876				-0.636056	0.00422002	-1.14264	-9.47478	1.6012	-0.582554
SPAS3	0.357479	0.630925	0.58867	0.668966	0.5337	0.346696	0.496693				0.76493	-0.0669725	0.136401	-0.202201	-0.350391	0.432646
SPAS4	-0.0724511	0.159512	0.101855	-0.337013	-0.444189	-0.436932	-0.187041				-3.20165	-0.361458	-4.30875	0.318017	-0.0163368	-0.571922
SPAS5	-0.195398	0.0155055	-0.00817939	0.0187461	-0.023416	-0.156696	-0.037371				-1.07935	-1.52752	-3.29188	-2.24911	5.69183	-0.761506
SPAS6	-0.0765893	0.172204	0.115381	0.169763	0.080523	-0.0368929	0.0567967				-3.2484	-0.329972	0.471323	-0.525674	-1.45817	-2.5395
SPAS7	-0.214612	0.236254	0.201081	0.288846	0.11935	-0.109001	0.0966736				-2.10084	-0.148881	0.43647	-0.586806	-1.91329	-1.88691
SPAS8	-0.889353	-0.772531	-0.88098	-0.851222	-0.866095	-0.885947	-0.900851				-0.131357	0.140382	-0.0337777	0.0174717	0.0229217	0.0168222
SPAS9	-0.318748	-0.136427	0.0670828	0.249954	-0.0244531	-0.256953	-0.0497326				-0.571991	-1.49171	2.72605	-1.09783	9.50799	-0.806453
SPAS10	-0.22966	0.073066	0.0272501	0.156296	-0.0357668	-0.231766	-0.0461117				-1.31815	-0.627048	4.73559	-1.22884	5.47991	-0.801042
SPAS11	-0.363064	-0.104358	-0.192337	-0.0484119	-0.254799	-0.423101	-0.283756				-0.712562	0.843042	-0.748296	4.26315	0.660529	-0.329344
SPAS12	-0.29498	-0.127175	0.0683432	0.180142	-0.200394	-0.320059	-0.0914371				-0.56887	-1.5374	1.63584	-2.11242	0.597144	-0.714311
SPAS13	-0.169815	0.0263118	0.184797	0.26392	-0.0644793	-0.196806	-0.00392593				-1.15494	6.02333	0.428161	-1.24431	2.05224	-0.980052
SPAS14	-0.220106	-0.0557354	0.0910536	0.158951	-0.124779	-0.233602	-0.0775927				-0.746779	-2.63367	0.74569	-1.78501	0.87213	-0.667842
SPAS15	-0.422074	-0.415297	-0.277241	-0.423556	-0.419804	-0.589691	-0.601865				-0.016057	-0.332427	0.527751	-0.00885667	0.404681	0.020644
SPAS16	-0.0404105	0.186315	0.137669	0.192758	0.108874	-0.0155765	0.0903805				-5.61055	-0.261093	0.400151	-0.435175	-1.14307	-6.80236
SPAS17	-0.585392	-0.354149	-0.479563	-0.336595	-0.603798	-0.724932	-0.634389				-0.395023	0.354128	-0.298123	0.793842	0.200621	-0.1249
SPAS18	0.24302	0.560229	0.530057	0.609268	0.45374	0.26264	0.436546				1.30528	-0.0538574	0.149439	-0.255271	-0.421165	0.662142
SPAS19	0.0258808	0.307129	0.254706	0.315421	0.166933	-0.0068094	0.132694				10.8671	-0.170688	0.238373	-0.470762	-1.04079	-20.4869
SPAS20	0.23636	0.599097	0.556153	0.618614	0.477155	0.30603	0.448952				1.53468	-0.0716818	0.112309	-0.22867	-0.358636	0.467018
SPAS21	-0.0225095	0.453885	0.400965	0.502411	0.305191	0.059795	0.242411				-21.1642	-0.116594	0.253005	-0.392548	-0.804073	3.05403
SPAS22	0.366954	0.66015	0.618802	0.602778	0.499065	0.331247	0.466166				0.799	-0.0626344	-0.0258946	-0.172058	-0.336266	0.407307
SPAS23	0.245132	0.527832	0.473458	0.493634	0.419172	0.323378	0.416303				1.15326	-0.103015	0.0426158	-0.150846	-0.22853	0.287356
SPAS24	-0.00301155	0.0647441	0.0473103	0.0551857	0.018881	-0.0353157	0.00120815				-22.4986	-0.269273	0.166462	-0.657865	-2.87044	-1.03421
SPAS25	-0.325784	0.0292282	0.216179	0.256101	-0.100921	-0.165331	-0.274606				-1.08972	6.39626	0.184671	-1.39407	0.638223	0.660943
SPAS26	0.239805	0.52215	0.474835	0.491837	0.389866	0.265601	0.374813				1.17739	-0.0906159	0.0358065	-0.207326	-0.318737	0.411185
SPAS27	0.102717	0.379209	0.331832	0.40663	0.25928	0.0898274	0.242341				2.69178	-0.124936	0.225409	-0.362368	-0.653551	1.69785
SPAS28	0.150106	0.439706	0.390221	0.449415	0.297881	0.114975	0.286547				1.92931	-0.112541	0.151692	-0.337179	-0.614025	1.49226
SPAS29	0.218791	0.494141	0.456757	0.54464	0.422425	0.25436	0.401662				1.25851	-0.0756535	0.192406	-0.224396	-0.397856	0.579106
SPAS30	0.251452	0.576851	0.536103	0.542808	0.397981	0.246917	0.414457				1.29408	-0.0706396	0.0125075	-0.266811	-0.379576	0.67853
SPAS31	0.0653188	0.449998	0.400441	0.458842	0.315816	0.139118	0.289569				5.88926	-0.110127	0.145842	-0.311712	-0.559496	1.08146
SPAS32	-0.251496	0.132378	0.101417	0.199172	0.127364	-0.0656024	0.149869				-1.52636	-0.233881	0.963889	-0.360534	-1.51508	-3.2845
SPAS33	0.11386	0.421773	0.369585	0.486412	0.384242	0.228476	0.36845				2.70431	-0.123735	0.316105	-0.210049	-0.405385	0.612645
SPAS34	-0.054176	0.398413	0.350206	0.438286	0.271353	0.150988	0.339529				-8.35406	-0.120999	0.251509	-0.380876	-0.443574	1.24871
SPAS35											#DIV/0!	#DIV/0!	#DIV/0!	#DIV/0!	#DIV/0!	#DIV/0!
ESTS1	-0.386643	0.229149	0.0534073	-0.164273	-0.0976237	-0.252577	-0.415156				-1.59266	-0.766932	-4.07585	-0.405722	1.58725	0.643684
ESTS2	-0.346603	-0.0943231	-0.183014	-0.279776	-0.231445	-0.286014	-0.265621				-0.727864	0.940288	0.528711	-0.172747	0.235777	-0.0713021
ESTS3	-0.328462	0.179471	-0.13188	-0.108632	-0.233585	-0.405074	-0.22239				-1.5464	-1.73483	-0.176285	1.15024	0.734165	-0.450989
ESTS4	-0.325585	-0.0264474	-0.0884363	-0.285964	-0.20906	-0.225315	-0.212555				-0.91877	2.34386	2.23356	-0.26893	0.0777542	-0.056633
ESTS5	-0.229027	-0.0806791	-0.112492	-0.158516	-0.129895	-0.15971	-0.176815				-0.647731	0.394312	0.409133	-0.180558	0.229539	0.107099
ESTS6	0.0853465	0.0396759	-0.207991	-0.280191	-0.38132	-0.363988	0.028367				-0.53512	-6.24225	0.347132	0.360925	-0.0454511	-1.07793
ESTS7	-0.430966	0.0437874	-0.320261	-0.2069	-0.18296	-0.238822	-0.207385				-1.1016	-8.31399	-0.353963	-0.115708	0.305325	-0.131637
ESTS8	-0.250423	-0.218685	-0.225041	-0.18296	-0.151903	-0.221604	-0.195963				-0.126737	0.0290657	-0.186991	-0.16975	0.458856	-0.115708
ESTS9	-0.638905	-0.551207	-0.549468	-0.543844	-0.492905	-0.492459	-0.631776				-0.137262	-0.0031548	-0.0102354	-0.0936643	-0.00090652	0.282902
ESTS10	-0.380466	-0.163066	-0.23999	-0.246413	-0.347061	-0.392891	-0.531036				-0.571404	0.471734	0.0267614	0.408453	0.132054	0.351609
ESTS11	-0.364514	-0.0339339	-0.16065	-0.299176	-0.246379	-0.325764	-0.273353				-0.906906	3.73419	0.862288	-0.176475	0.32221	-0.160888
ESTS12	-0.64934	-0.626822	-0.63767	-0.565904	-0.57259	-0.551043	-0.506547				-0.034679	0.0173069	-0.112544	0.0118153	-0.0376312	-0.0807483
ESTS13	-0.298473	-0.15818	-0.199297	-0.278365	-0.235931	-0.310148	-0.260944				-0.470037	0.259943	0.396731	-0.152442	0.314571	-0.158645
ESTS14	-0.857039	-0.826627	-0.881091	-0.871722	-0.840486	-0.844775	-0.640252				-0.0354852	0.0658863	-0.0106334	-0.0358318	0.00510248	-0.242104
ESTS15	-0.283601	-0.328405	-0.245526	-0.253869	-0.224765	-0.2679	-0.256364				0.157984	-0.252368	0.0339777	-0.114641	0.191914	-0.0430609
ESTS16	-0.213475	0.0586081	-0.0187316	-0.229724	-0.196478	-0.274195	-0.225404				-1.27454	-1.31961	11.264	-0.144725	0.395555	-0.177943
ESTS17	-0.0132857	-0.188129	-0.131943	-0.270686	-0.221493	-0.278732	-0.16466				13.1603	-0.298656	1.05153	-0.181734	0.258423	-0.409253
ESTS18	-0.124213	0.413335	0.365711	0.132239	0.152514	-0.056604	0.100191				-4.32762	-0.11522	-0.638405	0.153316	-1.37114	-2.77003
ESTS19	-0.166127	-0.0279493	-0.146414	-0.299558	-0.245707	-0.314358	-0.274998				-0.83176	4.23857	1.04596	-0.17977	0.279403	-0.125206
ESTS20	-0.224873	0.280919	0.222087	-0.108877	-0.067779	-0.219546	-0.108378				-2.24923	-0.209427	-1.49025	-0.377474	2.23914	-0.506354
ESTS21	0.050067	0.352436	0.238743	-0.0154839	0.0435513	-0.125935	-0.00626364				6.03929	-0.322592	-1.06486	-3.81269	-3.89164	-0.950263
ESTS22	-0.149011	0.110812	-0.0601834	-0.133239	-0.148124	-0.220566	-0.0506025				-1.74365	-1.54311	1.21388	0.11172	0.489058	-0.770579
ESTS23	-0.5005	-0.273508	-0.270238	-0.137505	-0.116521	-0.240846	-0.151486				-0.45353	-0.0119559	-0.491169	-0.152607	1.06698	-0.371028
ESTS24	-0.195152	0.0217938	-0.0217298	-0.22144	-0.180349	-0.247454	-0.209793				-1.11168	-1.99706	9.19061	-0.185563	0.372085	-0.152195
ESTS25	-0.295654	-0.101689	-0.122268	-0.200771	-0.160618	-0.208612	-0.177424				-0.656052	0.202369	0.642056	-0.199993	0.298804	-0.149501
ESTS26	-0.279123	0.161024	0.139116	-0.177841	-0.0991995	-0.250979	-0.174833				-1.57689	-0.136053	-2.27837	-0.442202	1.53005	-0.303396
ESTS27	-0.20437	0.0354624	-0.100979	-0.546233	-0.406605	-0.263576	-0.347972				-1.17352	-3.8475	4.40937	-0.25562	-0.351765	0.320198
ESTS28	-0.0926743	0.0399794	-0.111302	-0.292801	-0.231937	-0.336982	-0.234663				-1.4314	-3.78398	1.63068	-0.207866	0.452899	-0.303633
ESTS29	-0.0970722	0.436004	0.372925	0.138701	0.17145	0.0189061	0.160647				-5.49154	-0.144674	-0.628073	0.236113	-0.889728	7.49713
ESTS30	-0.0393759	0.137432	-0.058413	-0.319365	-0.207829	-0.374925	-0.216387				-4.49026	-1.42503	4.46737	-0.349243	0.804006	-0.422854
ESTS31	-0.181137	0.182049	0.0167871	-0.261561	-0.222166	-0.306501	-0.212869				-2.00504	-0.907788	-16.581	-0.150614	0.379603	-0.305486
ESTS32	-0.147094	-0.048034	-0.179276	-0.291328	-0.242265	-0.309388	-0.274291				-0.673448	2.73228	0.625021	-0.168412	0.277065	-0.113441
ESTS33	-0.141051	-0.0638357	-0.0442072	-0.222583	-0.19795	-0.281527	-0.379751				-0.547429	-0.307484	4.03498	-0.110668	0.422213	0.348901
ESTS34	0.129015	0.134593	-0.0437787	-0.25754	-0.157887	-0.307917	-0.183658				0.0432395	-1.32527	4.88278	-0.386942	0.950232	-0.403547
ESTS35											#DIV/0!	#DIV/0!	#DIV/0!	#DIV/0!	#DIV/0!	#DIV/0!
FINS1	0.122952	-0.0642013	0.230752	0.31904	0.20418	0.141302	0.0173679				-1.52216	-4.5942	0.382606	-0.360018	-0.307952	-0.877087
FINS2	-0.0588139	-0.204466	0.0837681	0.074571	0.020469	0.0398705	0.00274266				2.47649	-1.40969	-0.109793	-0.72551	0.947847	-0.931211
FINS3	0.252594	-0.0712401	0.386694	0.463093	0.36769	0.305499	0.298436				-1.28203	-6.42804	0.19757	-0.206013	-0.169139	-0.0231181
FINS4	-0.0649058	-0.321583	-0.0339962	0.000705439	-0.0872992	-0.118948	-0.158969				3.95462	-0.894285	-1.02075	-124.752	0.362529	0.336461
FINS5	-0.0580452	-0.139206	-0.0380747	-0.0336907	-0.0760129	-0.0450493	-0.0385137				1.39824	-0.726487	-0.115142	1.2562	-0.407347	-0.145078
FINS6	0.286971	0.192059	0.398694	0.46053	0.399942	0.349284	0.242243				-0.330735	1.07589	0.155096	-0.13156	-0.126663	-0.306458
FINS7	0.377493	-0.264039	0.402627	0.46161	0.43973	0.411549	0.195065				-1.69945	-2.52488	0.146494	-0.0473996	-0.0640866	-0.526021
FINS8	-0.688364	-0.705129	-0.831168	-0.712888	-0.753251	-0.691766	-0.899994				0.0243547	0.178746	-0.142306	0.056619	-0.0816253	0.301009
FINS9	-0.333869	-0.649847	-0.169028	-0.0837899	-0.106052	-0.280525	-0.431164				0.94641	-0.739896	-0.504283	0.265683	1.64518	0.536989
FINS10	-0.215126	-0.411036	-0.123487	-0.0785671	-0.0932248	-0.181317	-0.272991				0.910673	-0.699571	-0.363763	0.186563	0.944942	0.505601
FINS11	-0.0708216	-0.118678	0.0379541	0.128959	0.0230465	-0.0196405	0.0798922				0.675725	-1.31981	2.39777	-0.821289	-1.85221	-5.06772
FINS12	-0.200928	-0.713914	-0.297235	-0.192248	-0.295329	-0.346479	-0.0593986				2.55308	-0.583654	-0.353214	0.536192	0.173195	-0.828565
FINS13	-0.374191	-0.676318	-0.0274225	0.213882	0.089759	0.0307933	0.250495				0.807416	-0.959453	-8.7995	-0.580334	-0.656933	7.13473
FINS14	-0.179752	-0.599181	-0.0911491	0.141871	-0.0968002	0.0320405	0.380145				2.33338	-0.847877	-2.55647	-1.68231	-1.331	10.8645
FINS15	-0.285748	-0.506151	-0.19855	-0.113502	-0.202084	-0.233171	-0.0844352				0.771317	-0.607725	-0.428345	0.780443	0.153834	-0.637883
FINS16	-0.152228	-0.365324	-5.62008e-05	-0.00681824	-0.0839371	-0.146526	-0.110844				1.39984	-0.999846	120.319	11.3107	0.745667	-0.243518
FINS17	-0.175092	-0.450871	0.18679	0.267052	0.273455	0.114112	0.238881				1.57504	-1.41429	0.429687	0.0239783	-0.582703	1.09339
FINS18	0.453499	0.0148402	0.508996	0.573645	0.46766	0.42059	0.536643				-0.967276	33.2985	0.127012	-0.184756	-0.10065	0.275929
FINS19	-0.0465331	-0.150921	-0.0584054	0.0567601	-0.295678	-0.0869282	0.177376				2.24329	-0.613006	-1.97183	-6.20926	-0.706004	-3.04049
FINS20	0.243869	-0.0385905	0.356291	0.456401	0.344496	0.216361	0.328929				-1.15824	-10.2326	0.280977	-0.24519	-0.37195	0.520281
FINS21	0.333929	0.0828243	0.392939	0.491128	0.395135	0.347754	0.408374				-0.75197	3.74425	0.249883	-0.195454	-0.119911	0.174319
FINS22	0.355733	0.0918696	0.382742	0.403568	0.315942	0.31298	0.426257				-0.741745	3.16614	0.0544119	-0.217126	-0.00937715	0.361931
FINS23	0.181254	-0.0143232	-0.232959	0.165641	0.0751737	-0.177375	-0.512248				-1.07902	15.2645	-1.71103	-0.546166	-3.35954	1.88794
FINS24	-0.0459266	-0.150626	0.0313212	0.133022	0.0264921	-0.00885219	-0.213874				2.2797	-1.20794	3.24702	-0.800844	-1.33414	23.1606
FINS25	0.117936	-0.0267791	-0.257938	-0.134311	-0.0965885	-0.365536	-0.63593				-1.22706	8.63208	-0.479292	-0.280857	2.78447	0.739718
FINS26	0.0812487	-0.00294346	-0.0684834	0.195937	0.123559	0.0150328	-0.159524				-1.03623	22.2663	-3.86108	-0.369393	-0.878335	-11.6118
FINS27	0.0142499	-0.143785	0.174664	0.286834	0.15495	0.0569764	0.186992				-11.0903	-2.21475	0.642207	-0.459794	-0.632291	2.28192
FINS28	0.044681	-0.128016	0.280103	0.379496	0.264526	0.128657	0.234058				-3.8651	-3.18803	0.354845	-0.302953	-0.513634	0.819243
FINS29	0.503116	0.0825027	0.496398	0.569489	0.473048	0.420776	0.49198				-0.836017	5.01674	0.147243	-0.169347	-0.1105	0.169221
FINS30	0.107888	-0.149024	0.349956	0.455515	0.337776	0.211254	0.396126				-2.38129	-3.34832	0.301635	-0.258475	-0.374574	0.875116
FINS31	0.291978	0.0470702	0.465317	0.546408	0.464219	0.36985	0.370086				-0.838789	8.8856	0.17427	-0.150416	-0.203286	0.00063754
FINS32	0.195854	-0.0397113	0.246802	0.316363	0.230672	0.172788	0.227162				-1.20276	-7.2149	0.281852	-0.270862	-0.250937	0.314684
FINS33	0.290232	-0.0355099	0.405828	0.475183	0.385922	0.308036	0.353195				-1.12235	-12.4286	0.170898	-0.187846	-0.201816	0.146602
FINS34	0.190339	-0.0822377	0.313448	0.391276	0.26124	0.159871	0.312836				-1.43206	-4.81149	0.248296	-0.33234	-0.38803	0.956801
FINS35											#DIV/0!	#DIV/0!	#DIV/0!	#DIV/0!	#DIV/0!	#DIV/0!
FRAS1	0.0480452	0.316364	0.234521	0.417604	0.35247	0.141241	0.181075				5.58471	-0.258701	0.78067	-0.15597	-0.599283	0.282033
FRAS2	-0.134333	-0.0650227	-0.0882265	-0.040704	-0.0360806	-0.0876777	-0.0784388				-0.515957	0.356856	-0.538642	-0.113586	1.43005	-0.105374
FRAS3	0.360767	0.590479	0.508724	0.651907	0.605262	0.437077	0.481914				0.636733	-0.138456	0.281455	-0.0715515	-0.277872	0.102585
FRAS4	-0.153082	-0.0248376	-0.0547552	0.0517754	0.0392639	-0.088398	-0.0798721				-0.83775	1.20453	-1.94558	-0.24165	-3.25138	-0.0964484
FRAS5	-0.137503	-0.137009	-0.254875	-0.038697	-0.0362746	-0.0820701	-0.188254				-0.00359178	0.860281	-0.848173	-0.0625992	1.26247	1.29382
FRAS6	-0.115204	0.0555593	0.000282343	0.12082	0.105092	-0.0438807	-0.0156523				-1.48227	-0.994918	426.917	-0.130173	-1.41755	-0.643298
FRAS7	-0.0763346	0.272146	0.162191	0.361997	0.298217	0.0270512	0.0727658				-4.56517	-0.40403	1.23192	-0.176188	-0.90929	1.68992
FRAS8	-0.674364	-0.564615	-0.70856	-0.5101	-0.51553	-0.478516	-0.551233				-0.162745	0.254943	-0.280088	0.0106441	-0.0717977	0.151963
FRAS9	0.036624	0.331198	0.191061	0.381964	0.265351	-0.0694104	0.0452855				8.04319	-0.42312	0.999172	-0.305298	-1.26158	-1.65243
FRAS10	-0.115436	0.149443	0.0689924	0.195761	0.127919	-0.0935215	-0.0466547				-2.29459	-0.538336	1.83743	-0.346553	-1.7311	-0.501135
FRAS11	-0.141631	0.155236	0.0670068	0.236254	0.198338	-0.0904726	-0.0830248				-2.09605	-0.568354	2.52582	-0.160489	-1.45615	-0.0823214
FRAS12	0.0120888	0.292606	0.225786	0.379101	0.186708	-0.172906	-0.0144658				23.2047	-0.228362	0.679031	-0.507499	-1.92608	-0.916337
FRAS13	0.052144	0.365668	0.280356	0.43777	0.379464	0.141534	0.16518				6.01266	-0.233304	0.561478	-0.13319	-0.627016	0.167068
FRAS14	-0.101712	0.181591	0.0964474	0.27052	0.21177	-0.00763195	0.0136467				-2.78535	-0.468875	1.80485	-0.217176	-1.03604	-2.7881
FRAS15	-0.445723	-0.0552239	-0.0460486	0.135888	0.190825	0.123954	0.159962				-0.876103	-0.166147	-3.95097	0.404283	-0.350434	0.290497
FRAS16	-0.149007	0.0236441	-0.0388976	0.0899809	0.0680293	-0.0815953	-0.0733428				-1.15868	-2.64513	-3.31328	-0.243959	-2.19941	-0.10114
FRAS17	-0.329253	-0.0160525	-0.0214432	0.382129	-0.0302093	-0.297365	-0.14821				-0.951246	0.335821	-18.8205	-1.07906	8.8435	-0.50159
FRAS18	0.369553	0.613276	0.547675	0.676839	0.653951	0.478849	0.528598				0.659508	-0.106968	0.23584	-0.0338159	-0.26776	0.103893
FRAS19	-0.13662	0.194442	0.104803	0.2837	0.215688	-0.0226013	0.0346849				-2.42323	-0.461004	1.70697	-0.239732	-1.10479	-2.53464
FRAS20	0.338268	0.607124	0.519534	0.664516	0.618566	0.434339	0.479415				0.794799	-0.14427	0.279062	-0.0691491	-0.297829	0.103781
FRAS21	0.156026	0.46583	0.37458	0.554324	0.497454	0.274068	0.331066				1.98558	-0.195886	0.479854	-0.102592	-0.449058	0.207969
FRAS22	0.259012	0.487496	0.417113	0.518758	0.505696	0.379047	0.436788				0.882138	-0.144376	0.243685	-0.0251787	-0.250446	0.152333
FRAS23	0.0196011	0.340676	0.260482	0.408191	0.410609	0.228294	0.271787				16.3805	-0.235397	0.567063	0.00592388	-0.444012	0.190515
FRAS24	-0.0935815	0.261116	0.159009	0.353634	0.330297	0.102289	0.161748				-3.79025	-0.39104	1.22399	-0.0659903	-0.690312	0.581283
FRAS25	-0.137242	0.0979641	0.00824062	0.00905654	0.0839567	-0.0656446	-0.129281				-1.7138	-0.915881	0.0990119	8.27029	-1.78189	0.969403
FRAS26	0.0298274	0.418815	0.320564	0.486502	0.472525	0.268857	0.328451				13.0413	-0.234593	0.517645	-0.0287297	-0.43102	0.221655
FRAS27	-0.0740628	0.272986	0.168973	0.389487	0.340987	0.09887	0.163488				-4.68587	-0.381018	1.30502	-0.124522	-0.710048	0.653568
FRAS28	0.229444	0.514378	0.438944	0.612152	0.55565	0.352065	0.404114				1.24185	-0.14665	0.3946	-0.0923	-0.366392	0.147839
FRAS29	0.173721	0.465594	0.379328	0.554004	0.502145	0.275168	0.191687				1.68013	-0.185283	0.460489	-0.0936074	-0.452014	-0.303383
FRAS30	0.238623	0.551197	0.468322	0.639434	0.592813	0.397959	0.447979				1.3099	-0.150354	0.365372	-0.0729106	-0.328694	0.125693
FRAS31	0.137892	0.447487	0.357182	0.546957	0.451912	0.185772	0.259278				2.2452	-0.201805	0.531311	-0.173771	-0.58892	0.395677
FRAS32	-0.0680253	0.252969	0.155175	0.340649	0.290816	0.0560861	0.111686				-4.71874	-0.386583	1.19525	-0.14629	-0.807142	0.991336
FRAS33	0.0412672	0.376877	0.290244	0.503244	0.443742	0.186853	0.2545				8.13262	-0.229872	0.733865	-0.118237	-0.578914	0.362031
FRAS34	0.0532839	0.436436	0.34858	0.522312	0.468138	0.253763	0.308023				7.19077	-0.201304	0.498401	-0.10372	-0.457932	0.213823
FRAS35											#DIV/0!	#DIV/0!	#DIV/0!	#DIV/0!	#DIV/0!	#DIV/0!
UKGS1	0.161989	0.0165381	-0.0551829	0.133537	0.215992	-0.0719388	0.00754824				-0.897906	-4.33672	-3.4199	0.617469	-1.33306	-1.10493
UKGS2	0.066432	-0.131771	-0.197377	0.00243567	0.144441	-0.0152463	-0.0773101				-2.98354	0.497886	-1.01234	58.3024	-1.10555	4.07074
UKGS3	0.365998	0.169711	0.0448485	0.290899	0.37118	-0.00166884	0.13456				-0.536307	-0.735735	5.48626	0.275978	-1.0045	-81.631
UKGS4	-0.0547346	-0.1127	-0.117669	-0.0518694	-0.00828971	-0.0678099	-0.0727399				1.05903	0.0440877	-0.559191	-0.840181	7.18001	0.0727029
UKGS5	-0.0426668	-0.0539584	-0.0552862	-0.0321458	-0.0113866	-0.0568933	-0.0582383				0.264645	0.0246093	-0.418557	-0.645782	3.9965	0.0236406
UKGS6	-0.0547222	-0.0666227	-0.0844086	-0.14734	-0.0124517	-0.0573047	-0.0697014				0.21747	0.266965	0.745553	-0.91549	3.60216	0.216329
UKGS7	0.12816	-0.091127	-0.168709	0.0352652	0.158144	-0.0165417	-0.0556377				-1.71104	0.851364	-1.20903	3.48442	-1.1046	2.36349
UKGS8	0.140803	-0.0596519	-0.173719	0.0181235	0.156082	-0.26096	-0.424579				-1.42366	1.91221	-1.10433	7.61211	-2.67194	0.62699
UKGS9	0.122656	-0.0570152	-0.143853	0.103532	-0.0407478	-0.0982815	-0.00703877				-1.46484	1.52307	-1.71971	-1.39358	1.41195	-0.928382
UKGS10	0.0635133	-0.0475333	-0.0977358	0.00981736	-0.0478735	-0.0954172	-0.0989184				-1.7484	1.05615	-1.10045	-5.87641	0.99311	0.0366934
UKGS11	-0.239052	-0.209202	-0.203582	-0.240501	-0.00607029	-0.370864	-0.315491				-0.124867	-0.0268631	0.181349	-0.97476	60.095	-0.149308
UKGS12	0.160693	-0.0283036	-0.0737138	0.106169	0.215347	-0.240546	-0.21036				-1.17613	1.6044	-2.44029	1.02834	-2.11702	-0.125491
UKGS13	0.285018	-0.0591195	-0.133297	0.101157	0.227289	0.0335972	-0.013763				-1.20742	1.25471	-1.75888	1.2469	-0.852183	-1.40965
UKGS14	-0.166493	-0.121708	-0.158683	0.0218415	0.123446	-0.0307013	-0.0658539				-0.268987	0.303797	-1.13764	4.65191	-1.2487	1.14499
UKGS15	-0.455386	-0.523575	-0.479575	-0.442787	-0.159067	-0.533881	0.0763041				0.14974	-0.0840386	-0.0767092	-0.640759	2.35632	-1.14292
UKGS16	-0.0590484	-0.123279	-0.145015	-0.0383691	0.0665027	-0.0559688	-0.0864499				1.08776	0.176312	-0.735412	-2.73323	-1.8416	0.544609
UKGS17	-0.296954	-0.337819	-0.292902	-0.370898	0.107362	-0.728341	-0.531615				0.137614	-0.132961	0.266288	-1.28946	-7.78401	-0.270102
UKGS18	0.539645	0.282839	0.155885	0.45672	0.566434	0.417569	0.37411				-0.47588	-0.448855	1.92985	0.240221	-0.262811	-0.104077
UKGS19	0.188828	-0.0898979	-0.177556	0.103784	0.267103	0.0599199	0.0164584				-1.47608	0.975079	-1.58451	1.57365	-0.775667	-0.725327
UKGS20	0.47945	0.26264	0.124687	0.401307	0.504396	0.341012	0.288681				-0.452207	-0.525256	2.21853	0.256882	-0.32392	-0.153456
UKGS21	0.554412	0.278785	0.161247	0.442924	0.544025	0.383005	0.335827				-0.497152	-0.421608	1.74687	0.22826	-0.295979	-0.123178
UKGS22	0.448497	0.227238	0.105111	0.303969	0.43596	0.307129	0.295338				-0.493335	-0.537439	1.89188	0.434223	-0.29551	-0.0383906
UKGS23	0.274481	0.0157827	-0.108813	0.206543	0.339487	0.090838	0.0370653				-0.9425	-7.89445	-2.89815	0.643662	-0.732426	-0.591963
UKGS24	0.100425	-0.102255	-0.15373	0.00345265	0.0956441	-0.0164264	-0.0576339				-2.01822	0.503401	-1.02246	26.7017	-1.17175	2.5086
UKGS25	0.118941	-0.0956238	-0.186472	-0.050246	0.0547009	-0.0373532	-0.0225393				-1.80396	0.950062	-0.730544	-2.08866	-1.68286	-0.39659
UKGS26	0.170186	-0.0477392	-0.180869	0.0837602	0.24579	0.0566708	0.00294573				-1.28051	2.78869	-1.4631	1.93444	-0.769434	-0.94802
UKGS27	0.190034	-0.104859	-0.187934	0.0977743	0.294785	0.0842449	0.0274602				-1.55179	0.792245	-1.52026	2.01496	-0.714216	-0.674043
UKGS28	0.546138	0.388474	0.287448	0.519659	0.59525	0.44948	0.416537				-0.28869	-0.260059	0.807841	0.145461	-0.244889	-0.0732903
UKGS29	0.634065	0.455268	0.362137	0.597638	0.651187	0.541941	0.495777				-0.281985	-0.204563	0.650309	0.0896009	-0.167764	-0.0851827
UKGS30	0.304882	-0.0293704	-0.140201	0.276544	0.455367	0.246938	0.18931				-1.09633	3.77353	-2.97249	0.646635	-0.457717	-0.233371
UKGS31	0.354559	0.175839	0.0519175	0.319679	0.42034	0.233643	0.212507				-0.504063	-0.704744	5.15743	0.314883	-0.444156	-0.090465
UKGS32	0.177519	-0.0511358	-0.153286	0.119028	0.252209	0.0517354	0.00248281				-1.28806	1.99762	-1.77651	1.11891	-0.794871	-0.95201
UKGS33	0.270989	0.0857821	-0.034639	0.310393	0.0557987	0.0839111	0.191445				-0.683448	-1.4038	-9.96079	-0.820232	0.503818	1.28152
UKGS34	0.45057	0.101497	-0.0391668	0.303326	0.452928	0.271494	0.223803				-0.774738	-1.38589	-8.74448	0.493203	-0.40058	-0.175661
UKGS35											#DIV/0!	#DIV/0!	#DIV/0!	#DIV/0!	#DIV/0!	#DIV/0!
GRCS1	-0.28779	-0.349559	-0.509274	-0.436276	-0.505783	-0.642468	-0.60332				0.21463	0.456906	-0.143337	0.159318	0.270245	-0.0609346
GRCS2	-0.0410595	-0.0262833	-0.0689259	-0.11233	-0.141547	-0.234973	-0.190632				-0.359872	1.62242	0.629721	0.260098	0.660038	-0.188706
GRCS3	0.392683	0.371644	-0.0268764	0.434935	0.0521792	0.142446	0.205995				-0.0535773	-1.07232	-17.1828	-0.88003	1.72995	0.446121
GRCS4	-0.180483	-0.208273	-0.388586	-0.144253	-0.360345	-0.231695	-0.26398				0.153981	0.865751	-0.628775	1.49801	-0.35702	0.139343
GRCS5	-0.148603	-0.213956	-0.235475	-0.19337	-0.217398	-0.188263	-0.180026				0.43978	0.100578	-0.178808	0.124256	-0.134018	-0.0437506
GRCS6	-0.175712	-0.23615	-0.316247	-0.213068	-0.307194	-0.24217	-0.187248				0.343964	0.339176	-0.326261	0.441765	-0.21167	-0.22679
GRCS7	0.104497	-0.19089	-0.394855	-0.0596484	-0.355373	-0.175991	-0.0371464				-2.82675	1.06849	-0.848936	4.9578	-0.504772	-0.78893
GRCS8	-0.878667	-0.855978	-0.889116	-0.876344	-0.908234	-0.941036	-0.941221				-0.0258224	0.0387138	-0.014365	0.0363904	0.036116	0.000196007
GRCS9	-0.128082	-0.167385	-0.394682	-0.214235	-0.342446	-0.139358	-0.0235791				0.30685	1.35793	-0.457195	0.598458	-0.59305	-0.830802
GRCS10	-0.172292	-0.233408	-0.367809	-0.538635	-0.347756	-0.243923	-0.354741				0.354724	0.575823	0.464442	-0.354375	-0.298581	0.454316
GRCS11	-0.145805	-0.208238	-0.387264	-0.0908777	-0.358793	-0.196555	-0.110034				0.428201	0.859715	-0.765334	2.94809	-0.452177	-0.440187
GRCS12	-0.178114	-0.205239	-0.359168	-0.291903	-0.31031	-0.441951	-0.393847				0.152287	0.750004	-0.187281	0.0630594	0.424224	-0.108845
GRCS13	-0.171221	-0.240357	-0.367627	-0.189974	-0.347906	-0.24512	-0.167688				0.403788	0.529502	-0.483242	0.831332	-0.295443	-0.315894
GRCS14	-0.173559	-0.229386	-0.387345	-0.146027	-0.361449	-0.35913	-0.325515				0.321659	0.688619	-0.623005	1.47521	-0.00641475	-0.0936013
GRCS15	-0.186018	-0.234114	-0.318456	-0.213103	-0.308909	-0.238804	-0.190892				0.258557	0.360263	-0.330826	0.44958	-0.226943	-0.200634
GRCS16	-0.0679002	-0.240266	-0.360131	-0.186352	-0.347731	-0.242946	-0.155733				2.53852	0.498884	-0.482545	0.865995	-0.301339	-0.358981
GRCS17	-0.638236	-0.54021	-0.564593	-0.701554	-0.793795	-0.866602	-0.8609				-0.153589	0.0451359	0.242584	0.131481	0.0917202	-0.00657956
GRCS18	0.373786	0.148024	0.0640995	0.032468	-0.0132192	-0.133753	0.00040799				-0.603988	-0.566964	-0.493475	-1.40714	9.11811	-1.00305
GRCS19	0.0289444	0.113447	-0.187287	-0.0367966	-0.0533176	-0.107251	-0.0215809				2.91946	-2.65088	-0.803528	0.448981	1.01155	-0.798781
GRCS20	0.143477	0.0724204	-0.386087	0.237738	-0.27477	0.092622	0.281243				-0.495248	-6.33119	-1.61576	-2.15577	-1.33709	2.03646
GRCS21	0.019993	0.0130557	-0.363883	0.248387	-0.17604	0.116354	0.183813				-0.346987	-28.8716	-1.6826	-1.70873	-1.66095	0.579773
GRCS22	0.465327	0.367424	0.101623	0.153465	-0.062706	0.00311131	0.114851				-0.210397	-0.723417	0.510144	-1.4086	-1.04962	35.9139
GRCS23	0.179049	0.0388188	-0.21667	-0.0801057	0.00432267	-0.269541	-0.060921				-0.783194	-6.58158	-0.630287	-1.05396	-63.3551	-0.773982
GRCS24	-0.49779	-0.735158	-0.776482	-0.787776	-0.831622	-0.861953	-0.815929				0.476844	0.0562115	0.0145445	0.055658	0.0364723	-0.053395
GRCS25	0.00292459	0.0698845	-0.0842335	-0.178923	-0.160332	-0.14464	-0.0809126				22.8955	-2.20532	1.12413	-0.103905	-0.0978741	-0.440593
GRCS26	0.24172	0.40545	0.250605	0.130861	0.170394	0.21381	0.291161				0.677358	-0.381908	-0.477822	0.3021	0.254798	0.361778
GRCS27	0.401502	0.303752	0.212561	0.214528	0.155237	0.123976	0.197436				-0.24346	-0.300215	0.00925184	-0.276378	-0.201373	0.592525
GRCS28	0.252252	0.289198	0.193276	0.175177	0.102481	-0.114289	0.025155				0.146469	-0.331683	-0.0936415	-0.41499	-2.11523	-1.2201
GRCS29	0.244399	0.109738	-0.0199427	0.0357138	-0.0450235	-0.14208	-0.0887786				-0.550987	-1.18173	-2.79082	-2.26068	2.15567	-0.375149
GRCS30	0.404065	0.354861	0.294159	0.279001	0.205954	-0.08685	0.0978213				-0.121772	-0.17106	-0.0515299	-0.261814	-1.4217	-2.12632
GRCS31	0.186012	0.210403	0.0322468	0.0575821	-0.167472	-0.402176	-0.264583				0.131128	-0.846738	0.785671	-3.9084	1.40145	-0.342122
GRCS32	0.127504	0.141684	0.0815164	0.059346	-0.00352322	-0.197759	-0.110791				0.111207	-0.42466	-0.271975	-1.05937	55.1301	-0.439765
GRCS33	-0.191744	-0.151958	-0.341437	-0.180423	-0.320005	-0.470827	-0.425696				-0.207494	1.24691	-0.471578	0.77364	0.471311	-0.0958548
GRCS34	0.298223	0.277175	0.04481	-0.153646	-0.264974	-0.401308	-0.257889				-0.070577	-0.838333	-4.42883	0.724571	0.51452	-0.357379
GRCS35											#DIV/0!	#DIV/0!	#DIV/0!	#DIV/0!	#DIV/0!	#DIV/0!
HRVS1	-0.18863	-0.142708	-0.0667759	0.126396	-0.155557	-0.21945	-0.239064				-0.243451	-0.532081	-2.89283	-2.23072	0.410738	0.0893755
HRVS2	-0.869526	-0.584798	-0.491918	-0.525306	-0.245149	-0.198081	-0.251733				-0.327452	-0.158824	0.0678735	-0.533322	-0.191997	0.27086
HRVS3	0.247136	0.201919	0.267093	0.301951	0.150073	0.0237816	-0.00330283				-0.182965	0.322774	0.13051	-0.50299	-0.841533	-1.13888
HRVS4	-0.270292	-0.248949	-0.240796	-0.207236	-0.268531	-0.280537	-0.342113				-0.078961	-0.0327505	-0.139372	0.295775	0.0447104	0.219494
HRVS5	-0.256096	-0.20113	-0.199362	-0.186986	-0.207095	-0.186343	-0.234538				-0.214632	-0.00878757	-0.0620788	0.107542	-0.100207	0.258639
HRVS6	-0.43618	-0.239197	-0.232513	-0.229693	-0.349419	-0.526532	-0.344047				-0.45161	-0.0279405	-0.0121312	0.521244	0.50688	-0.34658
HRVS7	-0.275435	-0.259847	-0.269219	-0.230995	-0.285924	-0.282492	-0.37018				-0.0565928	0.036068	-0.141981	0.237791	-0.0120025	0.31041
HRVS8	-0.1702	-0.805022	-0.850296	-0.707507	-0.821219	-0.841417	-0.880526				3.72985	0.0562397	-0.167929	0.160721	0.0245956	0.0464805
HRVS9	-0.241392	-0.239841	-0.240489	-0.165767	-0.263624	-0.285014	-0.34433				-0.00642473	0.00270057	-0.310708	0.590332	0.0811384	0.208115
HRVS10	-0.27973	-0.248112	-0.360488	-0.438053	-0.303306	-0.261092	-0.322342				-0.113032	0.452926	0.215166	-0.307603	-0.139181	0.234591
HRVS11	-0.258458	-0.246173	-0.241419	-0.161678	-0.261071	-0.282234	-0.33748				-0.0475297	-0.0193136	-0.330299	0.614758	0.0810621	0.195742
HRVS12	-0.445525	-0.474564	-0.562225	-0.557337	-0.587605	-0.638225	-0.563604				0.0651797	0.184717	-0.00869284	0.0543072	0.0861462	-0.116918
HRVS13	-0.215905	-0.205754	-0.188516	-0.0477372	-0.22469	-0.257426	-0.313635				-0.0470158	-0.0837768	-0.746775	3.70683	0.14569	0.218353
HRVS14	-0.209001	-0.220763	-0.22624	-0.137296	-0.255798	-0.281417	-0.340215				0.0562806	0.02481	-0.39314	0.863107	0.100156	0.208935
HRVS15	-0.277557	-0.253755	-0.252268	-0.231153	-0.265741	-0.280299	-0.330301				-0.085755	-0.0058582	-0.0837017	0.149635	0.0547817	0.178389
HRVS16	-0.280018	-0.252894	-0.287845	-0.230122	-0.267832	-0.268742	-0.32998				-0.0968648	0.138202	-0.200535	0.163868	0.00339703	0.227871
HRVS17	-0.711986	-0.669891	-0.658951	-0.553828	-0.687984	-0.720192	-0.79668				-0.0591228	-0.0163313	-0.159531	0.242234	0.046814	0.106205
HRVS18	-0.248694	-0.0171173	-0.255381	-0.231691	-0.309437	-0.485484	-0.337613				-0.931171	13.9195	-0.0927636	0.335559	0.568926	-0.304583
HRVS19	-0.280081	-0.24537	-0.250764	-0.23065	-0.266693	-0.265997	-0.324176				-0.123931	0.0219835	-0.0802098	0.156266	-0.00261012	0.218722
HRVS20	-0.234313	-0.248561	-0.23084	-0.0737217	-0.258368	-0.30807	-0.369635				0.0608041	-0.0712933	-0.680637	2.50464	0.19237	0.199839
HRVS21	-0.380308	-0.346046	-0.315882	-0.214617	-0.344265	-0.373072	-0.409637				-0.0900913	-0.0871671	-0.320577	0.604088	0.0836766	0.0980101
HRVS22	-0.405671	-0.333208	-0.385521	-0.306946	-0.426165	-0.517103	-0.561058				-0.178626	0.156997	-0.203813	0.388401	0.213388	0.0850031
HRVS23	-0.191445	-0.165668	-0.142371	0.0516578	-0.0915394	-0.115238	-0.195279				-0.134644	-0.140625	-1.36284	-2.77203	0.258888	0.694574
HRVS24	-0.549652	-0.400734	-0.308078	-0.154264	-0.307233	-0.394961	-0.489785				-0.270933	-0.231214	-0.49927	0.991607	0.285542	0.240083
HRVS25	-0.278465	-0.262813	-0.287257	-0.220908	-0.239135	-0.25944	-0.302083				-0.0562107	0.0930085	-0.230973	0.0825107	0.0849099	0.164366
HRVS26	-0.443324	-0.415226	-0.369914	-0.298169	-0.394671	-0.395134	-0.439921				-0.0633812	-0.109125	-0.193952	0.323652	0.0011727	0.113345
HRVS27	-0.301052	-0.344199	-0.339221	-0.246449	-0.323814	-0.35885	-0.370299				0.143318	-0.0144618	-0.273484	0.313915	0.108198	0.0319056
HRVS28	-0.309469	-0.267204	-0.243891	-0.139419	-0.270966	-0.322001	-0.379024				-0.136574	-0.0872475	-0.428357	0.943541	0.188345	0.177092
HRVS29	-0.272768	-0.26676	-0.40324	-0.312141	-0.386958	-0.392753	-0.337165				-0.0220244	0.511619	-0.225919	0.239691	0.0149777	-0.141534
HRVS30	-0.449139	-0.39046	-0.364365	-0.244162	-0.399516	-0.42983	-0.491076				-0.130648	-0.0668325	-0.329896	0.636272	0.0758776	0.142487
HRVS31	-0.579546	-0.24623	-0.203086	-0.0957416	-0.309216	-0.488099	-0.358523				-0.575133	-0.175217	-0.528567	2.2297	0.578503	-0.26547
HRVS32	-0.362688	-0.327492	-0.325324	-0.261366	-0.329401	-0.33206	-0.387393				-0.0970419	-0.00661894	-0.196598	0.260306	0.00807148	0.166636
HRVS33	-0.381278	-0.329396	-0.312987	-0.175668	-0.306637	-0.45849	-0.368645				-0.136074	-0.0498167	-0.438737	0.745548	0.49522	-0.195957
HRVS34	-0.330006	-0.289808	-0.253567	-0.164778	-0.305547	-0.327633	-0.383731				-0.121811	-0.12505	-0.35016	0.854294	0.0722844	0.17122
HRVS35	-0.149182										-1	#DIV/0!	#DIV/0!	#DIV/0!	#DIV/0!	#DIV/0!
HUNS1	0.0458196	0.145755	0.0558114	0.0959309	0.0583834	-0.416656	-0.216386				2.18105	-0.617087	0.718841	-0.391401	-8.13654	-0.480659
HUNS2	-0.19045	-0.206156	-0.209299	-0.152839	-0.141199	-0.125953	-0.136197				0.0824681	0.0152466	-0.269758	-0.0761589	-0.107972	0.0813244
HUNS3	0.288352	0.333596	0.326886	0.417839	0.297147	-0.486514	-0.00973132				0.156905	-0.0201132	0.278241	-0.288849	-2.63728	-0.979998
HUNS4	-0.393306	-0.314919	-0.301776	-0.327568	-0.246232	-0.202354	-0.128167				-0.199302	-0.0417358	0.0854702	-0.248304	-0.178195	-0.366621
HUNS5	-0.196508	-0.151306	-0.128255	-0.104052	-0.0898158	-0.0818307	-0.0877279				-0.230027	-0.152346	-0.188714	-0.136815	-0.0889047	0.0720656
HUNS6	-0.155911	-0.10532	-0.100169	-0.0897509	-0.0847634	-0.279894	-0.250474				-0.324487	-0.0489111	-0.104002	-0.0555702	2.30206	-0.105111
HUNS7	-0.403274	-0.26758	-0.357035	-0.310017	-0.283551	-0.241257	-0.135047				-0.336482	0.334311	-0.13169	-0.0853699	-0.149157	-0.440234
HUNS8	-0.727362	-0.702926	-0.719189	-0.605475	-0.669952	-0.723574	-0.511817				-0.0335943	0.023136	-0.158114	0.106489	0.0800388	-0.292654
HUNS9	-0.7552	-0.502954	-0.389901	-0.123101	-0.232177	-0.352301	-0.171332				-0.334013	-0.224777	-0.684277	0.886069	0.517381	-0.513677
HUNS10	-0.551752	-0.415002	-0.53016	-0.266285	-0.295305	-0.237315	-0.33322				-0.247847	0.277487	-0.497727	0.108981	-0.196373	0.404126
HUNS11	-0.229349	-0.160797	-0.188003	-0.0965174	-0.0972154	-0.268207	-0.099851				-0.298898	0.169194	-0.486618	0.00723198	1.75889	-0.627709
HUNS12	-0.710693	-0.684304	-0.644477	-0.353172	-0.390299	-0.391283	-0.280454				-0.0371306	-0.0582012	-0.452002	0.105123	0.00252024	-0.283245
HUNS13	-0.671444	-0.599465	-0.620317	-0.326719	-0.313237	-0.320163	0.0430993				-0.1072	0.0347844	-0.473303	-0.0412659	0.0221128	-1.13462
HUNS14	-0.892573	-0.848564	-0.834254	-0.766987	-0.798339	-0.753066	-0.716042				-0.0493065	-0.0168637	-0.0806306	0.0408765	-0.0567095	-0.0491634
HUNS15	-0.851911	-0.844402	-0.838394	-0.81887	-0.803723	-0.822374	-0.735385				-0.00881488	-0.00711441	-0.023288	-0.0184974	0.0232052	-0.105778
HUNS16	-0.20963	-0.137056	-0.191894	-0.140669	-0.125548	-0.105352	-0.0955867				-0.346199	0.400106	-0.266944	-0.107491	-0.160865	-0.0926905
HUNS17	-0.312975	-0.23201	-0.179906	-0.323118	-0.366599	-0.492543	0.0331171				-0.258693	-0.224576	0.796035	0.134567	0.343547	-1.06724
HUNS18	-0.255723	-0.15326	-0.452529	-0.275726	-0.183515	-0.212038	-0.0785137				-0.40068	1.95269	-0.390699	-0.33443	0.155424	-0.629719
HUNS19	-0.332761	-0.256927	-0.24254	-0.441653	-0.437698	-0.443551	-0.221672				-0.227894	-0.0559976	0.820949	-0.00895413	0.0133729	-0.500234
HUNS20	-0.256916	-0.0570167	0.00660767	0.159458	0.165761	0.16006	0.15089				-0.778072	-1.11589	23.1322	0.0395279	-0.0343908	-0.0572916
HUNS21	-0.17246	0.0607046	-0.0329483	0.0495676	0.0857394	0.0842155	0.154203				-1.35199	-1.54276	-2.5044	0.729749	-0.0177738	0.831053
HUNS22	0.06622	0.198456	0.0881545	0.102913	0.0222815	-0.44217	-0.221741				1.99693	-0.555799	0.167417	-0.783492	-20.8447	-0.498517
HUNS23	-0.472823	-0.276071	-0.309142	-0.0455754	-0.156125	-0.268801	-0.091783				-0.416122	0.119793	-0.852575	2.42563	0.721709	-0.658547
HUNS24	-0.108661	-0.0915445	-0.113768	-0.0900252	-0.0803187	-0.0990529	-0.107987				-0.15752	0.24276	-0.208694	-0.10782	0.233249	0.090191
HUNS25	-0.502884	-0.396328	-0.422638	-0.292701	-0.274813	-0.410906	-0.244351				-0.211889	0.0663834	-0.307443	-0.0611113	0.495218	-0.405337
HUNS26	-0.315417	-0.190755	-0.282408	-0.24999	-0.218278	-0.219458	-0.15452				-0.39523	0.480476	-0.114791	-0.126852	0.00540418	-0.295903
HUNS27	-0.35351	-0.259176	-0.22677	-0.123983	-0.0868043	-0.0863857	-0.103897				-0.266851	-0.125033	-0.453267	-0.299868	-0.00482259	0.202713
HUNS28	-0.353487	-0.240858	-0.199603	-0.0599121	-0.0343694	-0.0117954	-0.040821				-0.318622	-0.171284	-0.699844	-0.426336	-0.656804	2.46074
HUNS29	-0.185647	0.0514679	-0.196524	-0.0972883	-0.0530482	-0.101332	0.00465978				-1.27724	-4.81838	-0.504954	-0.454732	0.910191	-1.04599
HUNS30	-0.463959	-0.299162	-0.224106	0.020633	0.0597989	0.0998009	0.0383749				-0.355197	-0.250887	-1.09207	1.89822	0.668941	-0.615485
HUNS31	-0.219877	-0.0617621	-0.297337	-0.196843	-0.145884	-0.14068	-0.0580302				-0.719106	3.81423	-0.337979	-0.258883	-0.0356686	-0.587503
HUNS32	-0.228503	-0.124049	-0.263906	-0.193988	-0.173186	-0.200836	-0.128565				-0.457123	1.12743	-0.264935	-0.107232	0.159653	-0.35985
HUNS33	-0.499165	-0.239304	-0.224382	-0.143585	-0.0981955	-0.148116	-0.0785986				-0.520592	-0.0623545	-0.360085	-0.316117	0.508376	-0.469344
HUNS34	-0.331831	-0.144006	-0.105982	-0.0618782	0.0118484	-0.0054314	0.0498639				-0.566024	-0.264044	-0.416147	-1.19148	-1.45841	-10.1807
HUNS35											#DIV/0!	#DIV/0!	#DIV/0!	#DIV/0!	#DIV/0!	#DIV/0!
INOS1	0.41477	0.456587	0.520568	0.611936	0.264563	0.122791	0.2028				0.100821	0.140129	0.175514	-0.567662	-0.535872	0.651584
INOS2	0.339945	0.38301	0.444685	0.534367	0.269026	0.0161789	0.0447234				0.126683	0.161028	0.201676	-0.496552	-0.939861	1.7643
INOS3	0.662014	0.663679	0.745845	0.767955	0.47467	0.485448	0.569973				0.0025144	0.123805	0.0296444	-0.381904	0.0227059	0.174118
INOS4	-0.736004	-0.61953	-0.575767	-0.483942	-0.502705	-0.58227	-0.614458				-0.158251	-0.070639	-0.159483	0.0387702	0.158275	0.0552791
INOS5	-0.517262	-0.364649	-0.252369	-0.272778	-0.326855	-0.365993	-0.281953				-0.29504	-0.307911	0.0808687	0.198244	0.119743	-0.229623
INOS6	0.23205	0.241522	0.267573	0.343402	0.0380453	-0.0305409	-0.00324725				0.0408159	0.107864	0.283393	-0.889211	-1.80275	-0.893675
INOS7	0.121343	0.140838	0.19022	0.260206	0.055677	-0.00617857	-0.00442777				0.160667	0.350627	0.367919	-0.786027	-1.11097	-0.283367
INOS8	0.507236	0.493714	0.520717	0.575763	0.360898	0.254711	0.240153				-0.0266582	0.0546931	0.105711	-0.373183	-0.294231	-0.0571534
INOS9	0.308524	0.365983	0.396238	0.464993	0.156678	0.0748918	0.123259				0.18624	0.0826684	0.173518	-0.663054	-0.522	0.645828
INOS10	0.345869	0.346987	0.372421	0.444718	0.128753	0.0264174	0.039361				0.00323005	0.0733018	0.194127	-0.710483	-0.794822	0.489963
INOS11	0.248216	0.293998	0.317181	0.367044	0.158451	0.0362395	0.0272108				0.184447	0.078852	0.157207	-0.568305	-0.771289	-0.24914
INOS12	0.358337	0.404051	0.434402	0.499387	0.292471	0.213928	0.192711				0.127572	0.0751173	0.149597	-0.414341	-0.268547	-0.0991816
INOS13	-0.179194	-0.0577836	-0.00324602	0.175125	-0.190164	-0.0294382	-0.0193257				-0.677535	-0.943824	-54.9505	-2.08588	-0.845196	-0.343515
INOS14	-0.274858	-0.569854	-0.464195	-0.330472	-0.444695	-0.532442	-0.45918				1.07326	-0.185414	-0.288075	0.345636	0.197319	-0.137597
INOS15	0.184722	0.2352	0.272041	0.327594	0.109491	0.0355582	0.034253				0.273262	0.15664	0.204206	-0.665771	-0.675242	-0.0367052
INOS16	0.0259935	0.0632194	0.111967	0.164101	0.0089611	-0.0569671	-0.0359365				1.43212	0.771089	0.465613	-0.945393	-7.35716	-0.369172
INOS17	-0.418416	0.304567	0.227061	0.401245	-0.226871	-0.496794	-0.421474				-1.72791	-0.254479	0.767121	-1.56542	1.18976	-0.151612
INOS18	0.690621	0.716198	0.740106	0.781705	0.613502	0.512838	0.470987				0.0370349	0.0333815	0.0562072	-0.215174	-0.164082	-0.0816059
INOS19	0.0549318	0.117026	0.163855	0.226477	0.0299322	0.0265844	0.0198591				1.13038	0.400161	0.382184	-0.867836	-0.111844	-0.252981
INOS20	0.315254	0.392524	0.44598	0.555983	0.278645	0.116799	0.110783				0.245105	0.136185	0.246653	-0.498825	-0.580831	-0.0515131
INOS21	0.145189	0.26923	0.326183	0.44503	0.155385	0.0133578	0.0144619				0.854344	0.211538	0.364358	-0.650843	-0.914034	0.082657
INOS22	0.242034	0.448268	0.587652	0.599952	0.15999	0.149485	0.307706				0.85209	0.310939	0.0209296	-0.733328	-0.0656613	1.05844
INOS23	-0.301133	-0.0096112	0.173773	0.496573	0.273241	0.202593	0.222227				-0.968083	-19.0802	1.8576	-0.449748	-0.258553	0.09691
INOS24	0.0798951	0.157015	0.228331	0.294033	0.0911569	0.034003	0.0526736				0.965269	0.454193	0.287752	-0.689978	-0.626984	0.549086
INOS25	-0.340787	-0.0924155	-0.00869359	0.367903	0.143671	0.200836	0.225992				-0.728818	-0.905929	-43.3188	-0.609486	0.397886	0.125257
INOS26	0.15514	0.223437	0.294212	0.420261	0.130277	-0.0523534	-0.0294886				0.440224	0.316755	0.428432	-0.690009	-1.40186	-0.43674
INOS27	0.149694	0.190088	0.250375	0.371274	0.0977192	-0.0215474	-0.0081846				0.26985	0.317151	0.482871	-0.7368	-1.2205	-0.620158
INOS28	0.163923	0.187559	0.233598	0.331739	0.115641	0.0705287	0.0745104				0.144188	0.245468	0.420128	-0.65141	-0.390107	0.0564555
INOS29	0.286506	0.319741	0.376676	0.478744	0.190965	-0.0399362	-0.0118454				0.116002	0.178067	0.270971	-0.601113	-1.20913	-0.703392
INOS30	0.13085	0.178591	0.244743	0.365421	0.0984562	0.0506692	0.0522538				0.364855	0.37041	0.493082	-0.730568	-0.485363	0.0312742
INOS31	0.22873	0.399456	0.399014	0.536731	0.262727	0.137669	0.177116				0.746413	-0.00110678	0.345141	-0.510506	-0.475998	0.28653
INOS32	0.216932	0.227024	0.275099	0.389504	0.124512	0.0227648	0.0262761				0.0465256	0.211759	0.415869	-0.680331	-0.817168	0.154242
INOS33	0.184568	0.167504	0.32619	0.385005	-0.0230216	-0.0855499	0.0487971				-0.0924546	0.947351	0.180311	-1.0598	2.71608	-1.57039
INOS34	0.0680201	0.108583	0.149055	0.210973	0.0353106	-0.0249319	-0.0157252				0.596339	0.372728	0.415405	-0.83263	-1.70608	-0.369275
INOS35											#DIV/0!	#DIV/0!	#DIV/0!	#DIV/0!	#DIV/0!	#DIV/0!
INDS1	0.109236	0.0404976	-0.155519	0.202228	0.171486	0.189021	0.134794				-0.629267	-4.84019	-2.30035	-0.152018	0.102253	-0.286881
INDS2	-0.195064	-0.311808	-0.434075	-0.171609	-0.155916	-0.230393	-0.228164				0.598493	0.392123	-0.604656	-0.0914458	0.477677	-0.00967449
INDS3	0.495206	0.530921	0.418696	0.547763	0.553812	0.49236	0.525693				0.0721222	-0.211378	0.308258	0.0110433	-0.110961	0.0677
INDS4	0.139222	0.140207	-0.0649532	0.152114	0.158014	0.0266081	0.0633558				0.00707601	-1.46327	-3.34191	0.0387836	-0.831609	1.38107
INDS5	-0.177142	-0.0942913	-0.162993	-0.0650931	-0.12216	-0.134362	-0.134497				-0.467707	0.728613	-0.600639	0.8767	0.0998855	0.0010048
INDS6	0.00505234	-0.00623572	-0.167948	0.0474592	0.0922758	0.0693657	0.00821334				-2.23423	25.9332	-1.28258	0.944317	-0.248278	-0.881594
INDS7	-0.21009	-0.0971235	-0.179774	-0.0195214	0.0461127	0.0134996	-0.050227				-0.537706	0.850984	-0.891411	-3.36216	-0.707247	-4.72062
INDS8	-0.444225	-0.466511	-0.695905	-0.562671	-0.581874	-0.671816	-0.716302				0.0501704	0.491721	-0.191454	0.0341277	0.154574	0.0662173
INDS9	-0.022564	-0.125594	-0.303391	0.0333034	-0.25588	-0.271769	-0.253153				4.56614	1.41565	-1.10977	-8.6833	0.0620945	-0.0684995
INDS10	0.0356558	-0.0281027	-0.190568	0.125468	-0.128877	-0.158559	-0.146204				-1.78817	5.78114	-1.65839	-2.02717	0.230315	-0.0779247
INDS11	-0.180996	-0.204343	-0.337807	-0.197901	-0.37068	-0.420323	-0.488538				0.128996	0.653133	-0.414159	0.873059	0.133925	0.16229
INDS12	-0.592026	-0.710343	-0.812847	-0.751799	-0.71453	-0.796923	-0.810376				0.199852	0.144302	-0.0751038	-0.0495728	0.11531	0.0168819
INDS13	-0.400802	-0.510048	-0.624514	-0.56061	-0.495561	-0.603714	-0.617153				0.272567	0.224422	-0.102326	-0.116031	0.218244	0.0222608
INDS14	-0.395045	-0.447279	-0.578623	-0.487574	-0.503775	-0.611985	-0.6163				0.132223	0.293652	-0.157355	0.033229	0.214797	0.00705131
INDS15	-0.27915	-0.432145	-0.58225	-0.525315	-0.488941	-0.597721	-0.611827				0.548076	0.347349	-0.0977835	-0.0692434	0.222482	0.0235992
INDS16	-0.102468	-0.143247	-0.25374	-0.540001	-0.481364	-0.587873	-0.600601				0.397965	0.771345	1.12817	-0.108588	0.221267	0.0216499
INDS17	-0.514743	-0.64794	-0.770011	-0.599395	-0.483	-0.603572	-0.61422				0.258764	0.188399	-0.221576	-0.194188	0.249632	0.017642
INDS18	0.183949	0.0589477	-0.262282	0.0460625	-0.0140909	-0.126797	-0.115763				-0.679543	-5.44941	-1.17562	-1.30591	7.99854	-0.0870269
INDS19	-0.196257	-0.140403	-0.189234	-0.216585	-0.154591	-0.189738	-0.179015				-0.284599	0.347795	0.144535	-0.286235	0.227361	-0.0565183
INDS20	-0.238605	-0.0192385	-0.1255	-0.403631	-0.352826	-0.405856	-0.343941				-0.919371	5.52339	2.21617	-0.125869	0.150298	-0.152552
INDS21	-0.174829	0.0483979	-0.0809622	-0.38809	-0.366295	-0.409289	-0.362768				-1.27683	-2.67285	3.79347	-0.0561593	0.117375	-0.113663
INDS22	0.208614	-0.260451	-0.270299	0.0783698	0.161122	0.204025	0.102348				-2.24848	0.0378114	-1.28994	1.05592	0.266275	-0.498356
INDS23	-0.389446	-0.520376	-0.578904	-0.145564	-0.0987654	-0.196107	-0.182187				0.336194	0.112474	-0.748553	-0.321497	0.985585	-0.0709812
INDS24	-0.094064	-0.0852765	-0.109312	-0.102803	-0.0650245	-0.0894527	-0.108234				-0.0934205	0.281858	-0.0595446	-0.367487	0.375676	0.20996
INDS25	-0.132944	-0.122308	-0.194905	-0.253595	-0.247214	-0.341429	-0.332773				-0.0800033	0.593559	0.301123	-0.0251652	0.38111	-0.0253534
INDS26	-0.225667	-0.159227	-0.265521	-0.165735	-0.13711	-0.201974	-0.148091				-0.294416	0.667561	-0.375811	-0.172715	0.473078	-0.266785
INDS27	-0.23399	-0.262465	-0.409296	-0.0749684	-0.0615316	-0.138361	-0.114222				0.121696	0.55943	-0.816836	-0.179233	1.24862	-0.174465
INDS28	-0.143184	-0.125476	-0.232716	-0.14388	0.0504164	0.0252951	0.0192309				-0.123676	0.854667	-0.381734	-1.35041	-0.498276	-0.239738
INDS29	-0.0996144	-0.122013	-0.294745	-0.172872	-0.149799	-0.226257	-0.222647				0.224854	1.41568	-0.413488	-0.133469	0.510412	-0.0159572
INDS30	0.0586712	-0.176464	-0.334834	-0.0239851	-0.0149535	-0.120281	-0.0937413				-4.00767	0.897464	-0.928367	-0.376548	7.04367	-0.220649
INDS31		-0.0285714	-0.0285714	-0.123224	0.28979	0.281009	0.236677				#DIV/0!	3.15983e-11	3.31284	-3.35174	-0.0303021	-0.157759
INDS32	-0.265314	-0.0400571	-0.178142	-0.107053	0.0387257	-0.0107421	-0.0399867				-0.84902	3.44722	-0.39906	-1.36174	-1.27739	2.72244
INDS33	-0.030732	-0.0688559	-0.201707	-0.116215	-0.0925765	-0.178949	-0.189947				1.24053	1.92941	-0.423843	-0.203404	0.932991	0.0614559
INDS34	-0.137672	-0.0637034	-0.164856	-0.0817461	0.0534677	0.0303458	-0.0581797				-0.537283	1.58787	-0.504136	-1.65407	-0.432447	-2.91723
INDS35											#DIV/0!	#DIV/0!	#DIV/0!	#DIV/0!	#DIV/0!	#DIV/0!
IRES1	-0.623736	-0.463183	-0.666262	-0.726203	-0.738784	-0.74593	-0.727233				-0.257406	0.438444	0.0899658	0.0173248	0.0096722	-0.0250657
IRES2	-0.264339	-0.267385	-0.314647	-0.283698	-0.265949	-0.29345	-0.212866				0.0115258	0.176755	-0.0983626	-0.06256	0.103404	-0.274608
IRES3	-0.833115	-0.579733	-0.710418	-0.783569	-0.801036	-0.813663	-0.815235				-0.304138	0.225423	0.102969	0.0222916	0.0157627	0.00193228
IRES4	-0.154157	-0.106864	-0.153569	-0.137405	-0.11224	-0.108042	-0.140097				-0.306783	0.437046	-0.105255	-0.183146	-0.0374008	0.296692
IRES5	-0.153029	-0.0808176	-0.0808716	-0.0729653	-0.0814354	-0.0879373	-0.0957677				-0.47188	0.000668442	-0.097764	0.116083	0.0798412	0.0890456
IRES6	-0.229922	-0.240401	-0.28249	-0.33868	-0.348881	-0.388609	-0.339058				0.0455771	0.175079	0.198908	0.0301204	0.113872	-0.127508
IRES7	-0.714644	-0.577766	-0.734691	-0.837692	-0.856588	-0.860422	-0.883724				-0.191533	0.271606	0.140196	0.0225579	0.0044751	0.0270829
IRES8	-0.117544	-0.48844	-0.616057	-0.712019	-0.708828	-0.753371	-0.761006				3.15536	0.261276	0.155767	-0.00448167	0.0628403	0.0101349
IRES9	-0.937337	-0.844137	-0.933957	-0.942492	-0.954832	-0.94152	-0.939103				-0.0994298	0.106404	0.00913911	0.0130924	-0.0139414	-0.00256791
IRES10	-0.331281	-0.2065	-0.265457	-0.297215	-0.256325	-0.371509	-0.326201				-0.376663	0.285509	0.119636	-0.137579	0.449369	-0.121958
IRES11	-0.265218	-0.228929	-0.232686	-0.255683	-0.337687	-0.339413	-0.343494				-0.136827	0.0164101	0.0988339	0.320727	0.00511099	0.0120219
IRES12	-0.479747	-0.380356	-0.386063	-0.380233	-0.374674	-0.423432	-0.453924				-0.207174	0.0150052	-0.0151022	-0.0146205	0.130136	0.0720114
IRES13	-0.571749	-0.424701	-0.515073	-0.219923	-0.268671	-0.179703	-0.233593				-0.25719	0.21279	-0.573025	0.221658	-0.33114	0.299884
IRES14	-0.810234	-0.54814	-0.682068	-0.795428	-0.779088	-0.863387	-0.875714				-0.323479	0.244331	0.166199	-0.0205419	0.108202	0.014277
IRES15	-0.273124	-0.190917	-0.244085	-0.293961	-0.226406	-0.220849	-0.277024				-0.300989	0.27849	0.204338	-0.229809	-0.0245447	0.254359
IRES16	-0.644998	-0.45099	-0.618607	-0.478996	-0.488646	-0.467724	-0.46385				-0.300788	0.371664	-0.225687	0.0201472	-0.0428157	-0.00828348
IRES17	-0.454514	-0.480856	-0.496138	-0.640702	-0.641426	-0.664843	-0.526074				0.0579553	0.0317808	0.291379	0.00113123	0.0365071	-0.208724
IRES18	-0.581995	-0.543388	-0.512139	-0.509518	-0.63252	-0.524644	-0.636609				-0.066335	-0.0575089	-0.00511776	0.241409	-0.17055	0.213412
IRES19	-0.319423	-0.324077	-0.469047	-0.392432	-0.3684	-0.311073	-0.381231				0.0145686	0.447333	-0.163342	-0.0612396	-0.15561	0.225536
IRES20	-0.805799	-0.622978	-0.813549	-0.863638	-0.83927	-0.840175	-0.859182				-0.226881	0.305903	0.061568	-0.028216	0.00107862	0.0226233
IRES21	-0.614484	-0.457103	-0.691825	-0.769682	-0.744976	-0.736405	-0.772785				-0.256119	0.513499	0.11254	-0.0321	-0.0115042	0.0494013
IRES22	-0.613319	-0.451124	-0.569994	-0.535245	-0.567432	-0.724492	-0.753374				-0.264455	0.263497	-0.060963	0.060134	0.276791	0.039865
IRES23	-0.172146	-0.210658	-0.302651	-0.390804	-0.309279	-0.585741	-0.617585				0.223715	0.436692	0.29127	-0.208609	0.893895	0.0543644
IRES24	-0.22967	-0.203257	-0.290813	-0.251441	-0.261103	-0.374455	-0.382758				-0.115002	0.430762	-0.135384	0.0384254	0.434126	0.0221749
IRES25	-0.645951	-0.362273	-0.45213	-0.515818	-0.503639	-0.749282	-0.769662				-0.439163	0.248036	0.140863	-0.0236119	0.487737	0.0271991
IRES26	-0.221384	-0.317332	-0.373736	-0.461848	-0.452178	-0.742309	-0.771604				0.433401	0.177745	0.235761	-0.0209372	0.641629	0.0394639
IRES27	-0.576047	-0.371728	-0.531989	-0.583257	-0.536199	-0.427932	-0.528345				-0.354691	0.431125	0.09637	-0.080682	-0.201916	0.234649
IRES28	-0.903605	-0.747787	-0.875839	-0.871258	-0.870336	-0.83191	-0.855098				-0.172441	0.171241	-0.00523016	-0.00105913	-0.0441501	0.0278729
IRES29	-0.763165	-0.577876	-0.738996	-0.76495	-0.714543	-0.585653	-0.614029				-0.24279	0.278812	0.0351212	-0.065896	-0.180382	0.0484528
IRES30	-0.942387	-0.867424	-0.937126	-0.949479	-0.963715	-0.959934	-0.961814				-0.0795458	0.0803549	0.0131812	0.0149942	-0.00392359	0.00195853
IRES31	-0.530787	-0.408071	-0.548324	-0.581576	-0.508655	-0.353568	-0.4965				-0.231196	0.343698	0.0606435	-0.125386	-0.304895	0.404253
IRES32	-0.337378	-0.279052	-0.393712	-0.413323	-0.375401	-0.364115	-0.381065				-0.172881	0.410892	0.0498097	-0.0917487	-0.0300631	0.0465508
IRES33	-0.484227	-0.442657	-0.483652	-0.630711	-0.678924	-0.663698	-0.723996				-0.0858476	0.092611	0.304057	0.0764425	-0.0224265	0.0908519
IRES34	-0.335022	-0.521925	-0.607269	-0.672995	-0.716291	-0.731085	-0.736584				0.557882	0.163517	0.108233	0.0643333	0.0206539	0.0075216
IRES35											#DIV/0!	#DIV/0!	#DIV/0!	#DIV/0!	#DIV/0!	#DIV/0!
ITAS1	0.448462	0.329698	0.214413	0.371094	0.220261	-0.181579	0.040624				-0.264824	-0.34967	0.730746	-0.406456	-1.82438	-1.22373
ITAS2	0.103186	0.154295	0.0874807	0.154066	0.107379	-0.0247851	0.020842				0.495306	-0.433029	0.761139	-0.30303	-1.23082	-1.84091
ITAS3	0.700461	0.571043	0.469476	0.601479	0.439289	-0.130489	0.228702				-0.184761	-0.177863	0.281171	-0.269651	-1.29705	-2.75266
ITAS4	0.435445	0.374884	0.277108	0.114578	0.0957896	-0.264947	-0.238541				-0.13908	-0.260816	-0.586521	-0.163981	-3.76593	-0.0996662
ITAS5	0.0863162	0.257946	0.172287	0.224085	0.180493	-0.199881	0.0775506				1.98839	-0.332081	0.300648	-0.194531	-2.10742	-1.38798
ITAS6	0.06951	-0.0478124	-0.121508	-0.0135588	-0.0671838	-0.135853	-0.0962419				-1.68785	1.54135	-0.888412	3.955	1.02211	-0.291573
ITAS7	0.4256	0.392654	0.303684	0.38894	0.307102	-0.0568603	0.169329				-0.0774105	-0.226588	0.280742	-0.210414	-1.18515	-3.97799
ITAS8	-0.373474	-0.503137	-0.686781	-0.651454	-0.713647	-0.837094	-0.787943				0.34718	0.364998	-0.0514383	0.0954682	0.172981	-0.0587165
ITAS9	-0.24963	-0.0734468	-0.230231	0.0093363	-0.189156	-0.583147	-0.473635				-0.705777	2.13467	-1.04055	-21.2602	2.0829	-0.187796
ITAS10	0.0152154	0.132524	0.092559	0.187492	0.0685682	-0.196313	-0.149458				7.70985	-0.301569	1.02564	-0.634287	-3.86303	-0.238675
ITAS11	0.319485	0.275485	0.187332	0.274931	0.242675	-0.121153	0.145623				-0.137722	-0.319993	0.467614	-0.117326	-1.49924	-2.20198
ITAS12	0.113003	0.209454	0.407582	0.27819	-0.0121172	-0.55998	-0.455381				0.853526	0.945923	-0.317462	-1.04356	45.2138	-0.186791
ITAS13	0.383935	0.447641	0.540159	0.448893	0.265451	-0.290863	-0.160792				0.165929	0.20668	-0.168962	-0.408655	-2.09573	-0.447191
ITAS14	-0.0446317	0.189556	0.182957	0.258259	0.0787775	-0.260646	-0.344078				-5.24712	-0.0348121	0.411581	-0.694967	-4.30863	0.320099
ITAS15	0.41706	0.448384	0.556324	0.480351	0.203881	-0.332406	-0.263791				0.075106	0.240732	-0.136563	-0.575558	-2.63039	-0.206419
ITAS16	0.230416	0.235054	0.256543	0.312575	0.206655	0.00346057	0.00249343				0.0201302	0.0914213	0.218411	-0.338863	-0.983254	-0.279473
ITAS17	0.479191	0.218515	0.0412052	0.312138	0.214523	-0.298711	-0.00194612				-0.543991	-0.811431	6.57522	-0.31273	-2.39244	-0.993485
ITAS18	0.529469	0.52723	0.581091	0.573852	0.406937	0.0351745	0.132842				-0.00422978	0.102159	-0.0124583	-0.290867	-0.913563	2.77666
ITAS19	0.411143	0.409126	0.335364	0.416987	0.352352	0.117133	0.225448				-0.00490546	-0.180291	0.243385	-0.155005	-0.667567	0.924716
ITAS20	0.67193	0.590005	0.493228	0.630138	0.557914	0.282614	0.482165				-0.121924	-0.164027	0.277578	-0.114615	-0.493445	0.706087
ITAS21	0.594899	0.59979	0.534565	0.605674	0.551251	0.329372	0.46078				0.00822099	-0.108746	0.133021	-0.0898552	-0.402501	0.398967
ITAS22	0.681806	0.595805	0.510624	0.557575	0.441506	0.104077	0.325178				-0.126137	-0.142968	0.0919465	-0.208167	-0.764267	2.12439
ITAS23	0.358754	0.131491	-0.121798	0.122642	-0.0435525	-0.454676	-0.157305				-0.633479	-1.92629	-2.00693	-1.35512	9.43971	-0.654028
ITAS24	0.0298125	-0.256087	-0.358525	-0.0648771	-0.254325	-0.416204	-0.292467				-9.58994	0.400011	-0.819044	2.9201	0.636505	-0.2973
ITAS25	0.19036	-0.145979	-0.258305	-0.121903	-0.259859	-0.355799	-0.30258				-1.76686	0.769462	-0.528063	1.13168	0.369203	-0.149578
ITAS26	0.499399	0.315046	0.151851	0.322966	0.214455	-0.206989	0.0787849				-0.369149	-0.518006	1.12687	-0.335984	-1.96519	-1.38062
ITAS27	0.409629	0.41678	0.32108	0.43133	0.362862	0.10937	0.225882				0.0174574	-0.229617	0.34337	-0.158737	-0.698592	1.06531
ITAS28	0.55336	0.542835	0.457816	0.549369	0.489287	0.26302	0.402261				-0.0190209	-0.156621	0.199979	-0.109366	-0.462442	0.529393
ITAS29	0.574067	0.523857	0.440295	0.52833	0.470213	0.241027	0.361333				-0.0874639	-0.159512	0.199946	-0.110003	-0.487408	0.499136
ITAS30	0.617166	0.600827	0.528089	0.6092	0.55091	0.312508	0.442335				-0.0264737	-0.121064	0.153594	-0.0956828	-0.432742	0.415436
ITAS31	0.399762	0.56684	0.484639	0.577239	0.487806	0.185953	0.34582				0.417944	-0.145017	0.191071	-0.154932	-0.618797	0.859715
ITAS32	0.340807	0.447002	0.361279	0.423111	0.374045	0.127341	0.243363				0.311601	-0.191773	0.171145	-0.115963	-0.659557	0.911109
ITAS33	0.391489	0.567415	0.49486	0.590503	0.524806	0.275633	0.401691				0.449379	-0.12787	0.193272	-0.111255	-0.474791	0.45734
ITAS34	0.665671	0.60579	0.532688	0.599604	0.548121	0.315435	0.436734				-0.0899556	-0.120672	0.125621	-0.0858621	-0.424516	0.384547
ITAS35											#DIV/0!	#DIV/0!	#DIV/0!	#DIV/0!	#DIV/0!	#DIV/0!
JPNS1	0.340783	0.402697	0.29154	0.42072	0.292532	0.132002	0.269288				0.18168	-0.276031	0.443095	-0.304686	-0.548761	1.04003
JPNS2	-0.401053	-0.160759	-0.236167	-0.177108	-0.0533696	-0.0512118	-0.0661247				-0.599158	0.469075	-0.250074	-0.69866	-0.0404299	0.2912
JPNS3	0.516642	0.581889	0.486571	0.591364	0.485328	0.340987	0.469883				0.12629	-0.163808	0.21537	-0.179307	-0.297409	0.378007
JPNS4	-0.0303548	0.163016	0.059523	0.133835	0.126089	0.0354167	0.0989733				-6.37035	-0.634864	1.24847	-0.0578843	-0.719112	1.79453
JPNS5	0.0169494	0.022178	0.00883277	0.0160788	0.0191449	0.0030513	0.0112298				0.308487	-0.601734	0.820354	0.190697	-0.840621	2.68034
JPNS6	0.202505	0.207432	0.116785	0.202086	0.0974449	0.010385	0.0871609				0.0243297	-0.436993	0.730407	-0.517806	-0.893427	7.39297
JPNS7	0.212486	0.366165	0.23904	0.354028	0.207381	0.0503752	0.178322				0.723245	-0.34718	0.481042	-0.414223	-0.757089	2.53988
JPNS8	-0.667925	-0.633576	-0.798052	-0.648389	-0.673408	-0.710446	-0.679464				-0.0514268	0.2596	-0.187535	0.0385872	0.0549997	-0.0436095
JPNS9	-0.077211	-0.122977	-0.381668	-0.171139	-0.0827605	-0.244297	-0.16429				0.59274	2.10357	-0.551603	-0.516413	1.95185	-0.327498
JPNS10	0.0143081	-0.0352733	-0.23023	-0.0923663	-0.0140806	-0.0846017	-0.0305238				-3.46527	5.52703	-0.598809	-0.847557	5.00839	-0.639206
JPNS11	-0.0147512	0.0707414	0.00684489	0.128135	-0.150972	-0.208611	-0.173729				-5.79562	-0.903241	17.7199	-2.17823	0.381785	-0.167211
JPNS12	-0.310402	-0.00432939	-0.318465	0.275655	-0.0902104	-0.405712	-0.097088				-0.986052	72.5588	-1.86557	-1.32726	3.4974	-0.760697
JPNS13	-0.0629318	0.130145	-0.138101	0.275197	0.166939	-0.00194012	0.267105				-3.06803	-2.06113	-2.99272	-0.393382	-1.01162	-138.675
JPNS14	-0.0165934	0.11873	0.0614854	-0.0612757	-0.291184	-0.53814	-0.182507				-8.15524	-0.48214	-1.99659	3.75203	0.848107	-0.660855
JPNS15	0.131863	0.376769	0.148569	0.412041	0.307678	0.0504315	0.303171				1.85728	-0.605676	1.7734	-0.253283	-0.83609	5.01155
JPNS16	-0.0739123	0.139196	-0.0342087	0.207878	0.223125	-0.0116218	0.208895				-2.88326	-1.24576	-7.07674	0.0733476	-1.05209	-18.9743
JPNS17	-0.287536	0.023721	-0.355895	0.107009	-0.513895	-0.560818	-0.482744				-1.0825	-16.0033	-1.30068	-5.80233	0.0913101	-0.139215
JPNS18	0.405504	0.581985	0.44139	0.631094	0.52891	0.33486	0.525985				0.435216	-0.241579	0.429789	-0.161915	-0.366888	0.570764
JPNS19	0.113101	0.17846	0.0289254	0.208504	0.131588	-0.0366917	0.165506				0.57788	-0.837916	6.20834	-0.368898	-1.27884	-5.51073
JPNS20	0.490799	0.556949	0.435715	0.566661	0.595495	0.497041	0.576993				0.134779	-0.217675	0.30053	0.0508843	-0.165332	0.160857
JPNS21	0.18249	0.492431	0.341764	0.523486	0.0848308	-0.0553162	0.0908281				1.6984	-0.305966	0.53172	-0.83795	-1.65208	-2.64198
JPNS22	0.422984	0.628327	0.546663	0.596545	0.329155	0.19488	0.317737				0.485462	-0.129971	0.091248	-0.448232	-0.407939	0.630424
JPNS23	-0.104709	-0.111305	-0.329726	-0.130596	0.016455	-0.176105	-0.0360123				0.0629888	1.96237	-0.603924	-1.126	-11.7022	-0.795507
JPNS24	-0.301553	-0.181738	-0.246817	-0.159936	-0.139431	-0.143392	-0.125714				-0.397327	0.358093	-0.352007	-0.128205	0.02841	-0.123284
JPNS25	-0.168675	-0.15482	-0.18906	0.0302544	-0.019794	-0.144772	-0.0604417				-0.0821393	0.221155	-1.16003	-1.65425	6.31395	-0.582505
JPNS26	0.26075	0.341326	0.255285	0.303764	0.162216	0.034949	0.105758				0.309017	-0.252078	0.189899	-0.465981	-0.784552	2.02605
JPNS27	0.389337	0.561193	0.492665	0.560884	0.447179	0.351505	0.440577				0.441407	-0.122111	0.13847	-0.202724	-0.21395	0.253401
JPNS28	0.514472	0.596572	0.534744	0.592961	0.417103	0.340215	0.409866				0.15958	-0.103638	0.108869	-0.296576	-0.184339	0.204729
JPNS29	0.390199	0.569446	0.442693	0.611452	0.529763	0.385822	0.526213				0.459373	-0.222589	0.381208	-0.133598	-0.271708	0.363874
JPNS30	0.480694	0.588778	0.521067	0.569986	0.399435	0.326008	0.39396				0.224849	-0.115002	0.0938808	-0.299218	-0.183828	0.208436
JPNS31	0.323671	0.465385	0.334238	0.502226	0.373232	0.274113	0.360659				0.437832	-0.281803	0.502601	-0.256845	-0.265569	0.315732
JPNS32	0.0593103	0.304932	0.138742	0.329997	-0.17585	-0.265136	-0.191126				4.1413	-0.545007	1.3785	-1.53288	0.507742	-0.279139
JPNS33	0.294994	0.403669	0.217819	0.425762	0.377486	0.227368	0.352658				0.368397	-0.460402	0.954658	-0.113388	-0.397677	0.551041
JPNS34	0.158043	0.352816	0.237952	0.377301	-0.0685977	-0.180149	-0.0739122				1.2324	-0.325564	0.585622	-1.18181	1.62617	-0.589717
JPNS35	0.299284	0.376674	0.255403	0.368363	0.293366	0.239323	0.283571				0.258585	-0.321953	0.44228	-0.203595	-0.184218	0.184887
KORS1	-0.0420637	0.0446844	0.0476671	0.0743482	0.0196973	-0.0247846	0.0446127				-2.0623	0.0667506	0.559736	-0.735067	-2.25827	-2.80002
KORS2	-0.131935	-0.075556	-0.0867583	-0.0797964	-0.0802983	-0.0959042	-0.088226				-0.427324	0.148265	-0.0802444	0.00628989	0.19435	-0.0800619
KORS3	0.313942	0.203077	0.203387	0.23439	0.178685	0.121044	0.204495				-0.353137	0.00152616	0.152434	-0.237659	-0.322586	0.689426
KORS4	-0.371902	-0.196927	-0.225491	-0.171753	-0.233064	-0.321126	-0.295783				-0.470487	0.145049	-0.238317	0.356974	0.377842	-0.0789172
KORS5	-0.0762745	-0.139759	-0.16497	-0.129396	-0.129603	-0.164461	-0.176493				0.832314	0.18039	-0.215637	0.00159626	0.268963	0.0731543
KORS6	-0.128956	-0.0733588	-0.0696242	-0.0616217	-0.0613185	-0.0798087	-0.0727098				-0.431132	-0.0509081	-0.114939	-0.00491944	0.301542	-0.0889492
KORS7	-0.238122	-0.251673	-0.121932	-0.110962	-0.170745	-0.184553	-0.123753				0.0569058	-0.515515	-0.0899673	0.538773	0.08087	-0.329445
KORS8	-0.702776	-0.238166	-0.588701	-0.527946	-0.653686	-0.749714	-0.755127				-0.661107	1.47181	-0.103202	0.238167	0.146903	0.00722045
KORS9	-0.472929	0.0148468	0.0144203	0.0192645	-0.136748	-0.237686	-0.244357				-1.03139	-0.0287225	0.335924	-8.09844	0.738139	0.0280637
KORS10	-0.377591	-0.110755	-0.101973	-0.111408	-0.182168	-0.188137	-0.137023				-0.706679	-0.0792911	0.0925244	0.635136	0.0327677	-0.271684
KORS11	-0.229636	-0.0277632	-0.0443479	-0.236725	-0.188435	-0.333384	-0.34668				-0.879099	0.597364	4.3379	-0.203994	0.769231	0.0398814
KORS12	-0.594849	-0.423071	-0.538312	-0.39832	-0.495785	-0.608274	-0.570544				-0.288776	0.272392	-0.260059	0.244691	0.226891	-0.0620272
KORS13	-0.359668	-0.272949	-0.31826	-0.236241	-0.310429	-0.451031	-0.417901				-0.241107	0.166004	-0.257713	0.314039	0.452927	-0.0734532
KORS14	-0.560135	-0.556517	-0.550748	-0.513323	-0.667764	-0.71654	-0.652687				-0.00645889	-0.0103664	-0.0679527	0.300865	0.0730442	-0.0891127
KORS15	-0.313107	-0.249041	-0.218822	-0.200034	-0.301749	-0.416655	-0.308246				-0.204615	-0.121339	-0.0858606	0.508487	0.380802	-0.260191
KORS16	-0.261574	-0.213965	-0.28514	-0.237871	-0.277428	-0.326807	-0.326005				-0.182009	0.332648	-0.165773	0.166294	0.17799	-0.00245413
KORS17	-0.654325	-0.202816	-0.164696	-0.238907	-0.506198	-0.276325	-0.619532				-0.690037	-0.187957	0.450596	1.11881	-0.454118	1.24204
KORS18	-0.213873	0.192523	0.0347411	0.224043	0.0290804	-0.159253	-0.112789				-1.90017	-0.819549	5.44893	-0.870202	-6.47629	-0.291759
KORS19	-0.0616087	-0.0821349	-0.093063	-0.0839321	-0.106549	-0.115965	-0.0947782				0.333171	0.13305	-0.0981151	0.269467	0.0883681	-0.182697
KORS20	-0.0600604	-0.00761578	0.00313339	0.0250138	-0.129807	-0.118556	0.0484268				-0.873198	-1.41143	6.98298	-6.1894	-0.0866733	-1.40847
KORS21	-0.0493078	-0.119797	-0.103557	-0.119587	-0.220467	-0.226475	-0.142584				1.42958	-0.135562	0.154791	0.843566	0.0272539	-0.37042
KORS22	0.231053	0.397688	0.409881	0.357118	0.302598	0.306852	0.401522				0.721199	0.0306619	-0.128729	-0.152667	0.0140574	0.308521
KORS23	-0.483238	-0.0884881	-0.0894483	-0.0842764	-0.140363	-0.135478	-0.124833				-0.816885	0.0108513	-0.0578199	0.665512	-0.0348054	-0.0785762
KORS24	-0.339528	-0.170981	-0.159966	-0.160497	-0.245194	-0.240239	-0.146756				-0.496416	-0.0644204	0.00331888	0.527717	-0.0202109	-0.389125
KORS25	-0.309756	-0.163216	-0.158654	-0.161809	-0.222387	-0.216276	-0.153539				-0.473082	-0.0279496	0.019888	0.374376	-0.0274799	-0.290077
KORS26	-0.199312	-0.146971	-0.143533	-0.14615	-0.22524	-0.230775	-0.147898				-0.262609	-0.0233968	0.0182357	0.541158	0.0245737	-0.359126
KORS27	-0.20157	-0.166932	-0.152925	-0.150605	-0.243945	-0.239888	-0.133461				-0.17184	-0.0839049	-0.0151724	0.619763	-0.0166308	-0.443654
KORS28	-0.161347	-0.105117	-0.0853305	-0.0728936	-0.20277	-0.192224	-0.0500663				-0.348501	-0.188236	-0.14575	1.78173	-0.0520107	-0.739542
KORS29	0.0139309	0.0657677	0.0859432	0.0838495	-0.0756432	-0.0616917	0.0909125				3.72099	0.30677	-0.024361	-1.90213	-0.184437	-2.47366
KORS30	-0.31561	-0.172016	-0.14466	-0.134185	-0.298503	-0.286999	-0.0992846				-0.454972	-0.159033	-0.0724125	1.22457	-0.0385403	-0.654059
KORS31	-0.151492	-0.14372	-0.130038	-0.122381	-0.22214	-0.214885	-0.10104				-0.051304	-0.0952001	-0.0588766	0.815143	-0.0326569	-0.529794
KORS32	-0.36608	0.00344583	0.011776	-0.0588347	-0.15683	-0.112131	0.0253467				-1.00941	2.41746	-5.99615	1.6656	-0.285019	-1.22605
KORS33	-0.382823	0.128553	0.157217	0.139523	0.0321719	0.00920286	0.030296				-1.3358	0.222967	-0.11254	-0.769416	-0.713947	2.29202
KORS34	-0.214686	-0.101803	-0.0836321	-0.0952381	-0.190069	-0.174459	-0.147897				-0.525808	-0.178488	0.138775	0.995722	-0.0821275	-0.152252
KORS35											#DIV/0!	#DIV/0!	#DIV/0!	#DIV/0!	#DIV/0!	#DIV/0!
LTUS1	-0.62561	-0.443365	-0.414611	-0.606948	-0.526485	-0.529466	-0.623398				-0.291308	-0.0648539	0.463898	-0.13257	0.00566186	0.177409
LTUS2	-0.233482	-0.209101	-0.208046	-0.152785	-0.216385	-0.251967	-0.0721384				-0.104423	-0.00504356	-0.265618	0.416265	0.16444	-0.713699
LTUS3	-0.532059	-0.158984	-0.0168344	-0.251297	-0.269762	-0.542046	-0.43883				-0.701191	-0.894113	13.9276	0.0734759	1.00935	-0.190419
LTUS4	-0.272804	-0.186955	-0.293472	-0.295022	-0.294886	-0.352152	-0.32399				-0.314691	0.569751	0.00528158	-0.000463507	0.194198	-0.0799723
LTUS5	-0.22523	-0.155164	-0.146	-0.12961	-0.083207	-0.125627	-0.0966527				-0.311085	-0.0590627	-0.112262	-0.358019	0.509816	-0.230639
LTUS6	-0.453667	-0.539427	-0.431554	-0.529946	-0.635524	-0.618645	-0.642219				0.189038	-0.199978	0.227996	0.199222	-0.0265595	0.0381065
LTUS7	-0.440197	-0.447445	-0.496693	-0.241223	-0.459648	-0.529491	-0.505147				0.016467	0.110064	-0.514341	0.90549	0.151948	-0.0459749
LTUS8	-0.913866	-0.932317	-0.936738	-0.911065	-0.879193	-0.840697	-0.918773				0.0201895	0.00474266	-0.0274072	-0.0349835	-0.0437848	0.0928699
LTUS9	-0.690717	-0.691907	-0.780611	-0.666659	-0.771304	-0.730347	-0.785868				0.00172279	0.128203	-0.145978	0.156969	-0.0531006	0.0760203
LTUS10	-0.473814	-0.552127	-0.389116	-0.329748	-0.506832	-0.572657	-0.558074				0.165281	-0.295242	-0.15257	0.537027	0.129875	-0.0254658
LTUS11	-0.442036	-0.223142	-0.266639	-0.296898	-0.210645	-0.212562	-0.26515				-0.495193	0.194926	0.113484	-0.290512	0.00909741	0.247404
LTUS12	-0.301263	-0.439317	-0.516603	-0.346395	-0.558965	-0.611521	-0.656624				0.458251	0.175923	-0.329476	0.613663	0.0940232	0.0737566
LTUS13	-0.129126	-0.212381	-0.242851	-0.183559	-0.0985696	-0.429571	-0.457212				0.644755	0.143473	-0.244151	-0.463008	3.35805	0.0643464
LTUS14	-0.273528	-0.367285	-0.395628	-0.293232	-0.293789	-0.422702	-0.529203				0.342769	0.0771704	-0.25882	0.00189868	0.438795	0.251954
LTUS15	-0.227323	-0.316149	-0.289107	-0.157208	-0.141055	-0.336737	-0.500114				0.39075	-0.0855347	-0.456229	-0.102746	1.38727	0.485179
LTUS16	-0.235579	-0.415291	-0.244978	-0.200781	-0.467185	-0.49742	-0.303612				0.762854	-0.410106	-0.18041	1.32684	0.0647166	-0.389626
LTUS17	-0.812489	-0.660834	-0.686432	-0.612243	-0.668545	-0.70112	-0.429416				-0.186655	0.038736	-0.108079	0.0919599	0.0487259	-0.387529
LTUS18	-0.520527	-0.421047	-0.546698	-0.450667	-0.321852	-0.390377	0.173638				-0.191114	0.298426	-0.175657	-0.285833	0.21291	-1.44479
LTUS19	-0.214035	-0.291906	-0.239373	-0.184654	-0.0620875	-0.0941185	-0.17003				0.363825	-0.179963	-0.228595	-0.663763	0.515899	0.806551
LTUS20	-0.199546	-0.0946919	-0.0800211	-0.179145	-0.125264	-0.135841	-0.243876				-0.525463	-0.154932	1.23872	-0.300767	0.0844365	0.795312
LTUS21	-0.0211288	-0.232331	-0.101891	0.0299259	0.139138	0.0998101	0.10289				9.99594	-0.56144	-1.29371	3.64941	-0.282653	0.03086
LTUS22	-0.259879	-0.227151	-0.267019	-0.217995	-0.239077	-0.436129	-0.306552				-0.125937	0.175513	-0.183597	0.0967102	0.824219	-0.297108
LTUS23	-0.548368	-0.519753	-0.551914	-0.648071	-0.611294	-0.571375	-0.679399				-0.0521833	0.061878	0.174224	-0.0567483	-0.0653025	0.18906
LTUS24	-0.267979	-0.146836	-0.165737	-0.27949	-0.194168	-0.210709	-0.271395				-0.452061	0.128719	0.686344	-0.305275	0.0851855	0.288009
LTUS25	-0.284997	-0.231409	-0.298423	-0.328644	-0.475452	-0.487693	-0.618562				-0.188029	0.28959	0.101268	0.446709	0.0257465	0.268343
LTUS26	-0.516581	-0.244058	-0.270852	-0.236166	-0.159452	-0.199205	-0.304512				-0.527551	0.109785	-0.128063	-0.32483	0.249308	0.528636
LTUS27	-0.272477	-0.261081	-0.296065	-0.250436	-0.156835	-0.172872	0.0801186				-0.041825	0.133997	-0.154119	-0.373753	0.102254	-1.46346
LTUS28	-0.204632	-0.200469	-0.248281	-0.164303	0.00610101	-0.0491048	0.281587				-0.0203458	0.2385	-0.338237	-1.03713	-9.04863	-6.73441
LTUS29	-0.322895	-0.477301	-0.388705	-0.110412	-0.109235	-0.183554	0.243758				0.478194	-0.18562	-0.715948	-0.0106632	0.680355	-2.32799
LTUS30	-0.362614	-0.255051	-0.310931	-0.153777	-0.00342387	-0.0936873	0.428252				-0.296631	0.219092	-0.505431	-0.977735	26.363	-5.57109
LTUS31	-0.455367	-0.17386	-0.23584	-0.171267	0.000304015	-0.0537093	0.353683				-0.618197	0.35649	-0.273801	-1.00178	-177.666	-7.58514
LTUS32	-0.370825	-0.307613	-0.407422	-0.325222	-0.241936	-0.405311	0.0581378				-0.170465	0.324464	-0.201755	-0.25609	0.67528	-1.14344
LTUS33	-0.224871	-0.128826	-0.180347	-0.177466	-0.060674	-0.110858	-0.176186				-0.427111	0.399923	-0.0159743	-0.658109	0.827107	0.589299
LTUS34	-0.336888	-0.174135	-0.311979	-0.160624	-0.0294796	-0.112399	0.292929				-0.483109	0.791596	-0.485144	-0.816469	2.81277	-3.60616
LTUS35											#DIV/0!	#DIV/0!	#DIV/0!	#DIV/0!	#DIV/0!	#DIV/0!
LUXS1	-0.392926	-0.414033	-0.307313	-0.270061	-0.245912	-0.254532	-0.261521				0.0537193	-0.257759	-0.121216	-0.089422	0.0350526	0.0274602
LUXS2	-0.263676	-0.208023	-0.176434	-0.184415	-0.169895	-0.164408	-0.164964				-0.211064	-0.151856	0.0452389	-0.0787362	-0.0322955	0.00337767
LUXS3	-0.399659	-0.406173	-0.461294	-0.392002	-0.358026	-0.379507	-0.406693				0.0162979	0.135708	-0.150211	-0.0866744	0.0599987	0.0716363
LUXS4	-0.40261	-0.342306	-0.322341	-0.304809	-0.271431	-0.278762	-0.291147				-0.149784	-0.0583234	-0.05439	-0.109505	0.0270107	0.0444261
LUXS5											#DIV/0!	#DIV/0!	#DIV/0!	#DIV/0!	#DIV/0!	#DIV/0!
LUXS6	-0.378859	-0.244325	-0.200678	-0.212232	-0.196112	-0.201882	-0.21353				-0.355104	-0.178643	0.0575751	-0.0759538	0.0294209	0.0576965
LUXS7	-0.346557	-0.403714	-0.330184	-0.36886	-0.370569	-0.388606	-0.410359				0.164927	-0.182136	0.117137	0.00463314	0.0486727	0.0559781
LUXS8											#DIV/0!	#DIV/0!	#DIV/0!	#DIV/0!	#DIV/0!	#DIV/0!
LUXS9	-0.57708	-0.354799	-0.361839	-0.361735	-0.333263	-0.336224	-0.342527				-0.385182	0.0198405	-0.000285647	-0.0787099	0.00888462	0.0187473
LUXS10	-0.577176	-0.628992	-0.590721	-0.582728	-0.539936	-0.551611	-0.52835				0.0897748	-0.0608445	-0.0135306	-0.0734337	0.0216216	-0.0421686
LUXS11	-0.443309	-0.569504	-0.568792	-0.495176	-0.507882	-0.462522	-0.579553				0.284666	-0.00125076	-0.129424	0.0256581	-0.0893114	0.253027
LUXS12	-0.745735	-0.743042	-0.741046	-0.680732	-0.625754	-0.645309	-0.660547				-0.00361167	-0.00268549	-0.0813912	-0.0807619	0.0312499	0.0236129
LUXS13	-0.466114	-0.514472	-0.466986	-0.401529	-0.394938	-0.40864	-0.426328				0.103746	-0.0923004	-0.14017	-0.0164141	0.0346953	0.0432849
LUXS14	-0.378665	-0.412195	-0.392971	-0.354296	-0.346994	-0.358851	-0.373164				0.0885478	-0.0466381	-0.0984177	-0.0206102	0.0341715	0.0398866
LUXS15	-0.342178	-0.203158	-0.221219	-0.182834	-0.246023	-0.212802	-0.177526				-0.406281	0.0889023	-0.173517	0.345613	-0.135033	-0.16577
LUXS16	-0.255511	-0.224707	-0.236104	-0.207373	-0.192632	-0.204655	-0.217159				-0.120559	0.0507229	-0.121691	-0.0710816	0.062415	0.0610959
LUXS17	-0.505186	-0.486342	-0.404626	-0.437808	-0.383927	-0.476454	-0.560018				-0.0373025	-0.16802	0.0820052	-0.12307	0.241001	0.175388
LUXS18	-0.697547	-0.591411	-0.587248	-0.532927	-0.516816	-0.527987	-0.561365				-0.152157	-0.00703951	-0.0925006	-0.0302313	0.0216149	0.0632174
LUXS19	-0.412102	-0.366777	-0.358016	-0.336584	-0.323571	-0.318992	-0.322465				-0.109984	-0.0238872	-0.059864	-0.0386618	-0.0141507	0.0108855
LUXS20	-0.775097	-0.653911	-0.664927	-0.630048	-0.609985	-0.612912	-0.640968				-0.156349	0.0168453	-0.0524546	-0.0318439	0.00479783	0.0457759
LUXS21	-0.677343	-0.635398	-0.63199	-0.60407	-0.577618	-0.577924	-0.603099				-0.0619257	-0.00536384	-0.0441776	-0.04379	0.000529554	0.0435607
LUXS22	-0.457079	-0.369591	-0.306713	-0.279835	-0.253727	-0.261428	-0.28908				-0.191405	-0.17013	-0.08763	-0.0933002	0.0303529	0.105774
LUXS23	-0.579036	-0.435439	-0.399029	-0.387527	-0.352902	-0.359511	-0.323987				-0.247994	-0.0836156	-0.0288258	-0.0893493	0.0187266	-0.0988109
LUXS24	-0.306808	-0.322457	-0.32877	-0.2985	-0.388177	-0.412938	-0.357595				0.0510067	0.0195764	-0.0920682	0.300422	0.0637899	-0.134024
LUXS25	-0.48453	-0.547719	-0.423679	-0.370954	-0.358435	-0.38647	-0.400516				0.130414	-0.226466	-0.124446	-0.0337488	0.0782171	0.0363432
LUXS26	-0.685403	-0.497316	-0.48936	-0.448256	-0.450498	-0.492067	-0.516187				-0.274417	-0.015998	-0.0839958	0.00500097	0.0922735	0.049017
LUXS27	-0.681325	-0.607324	-0.610513	-0.563054	-0.562137	-0.563344	-0.584196				-0.108612	0.00524938	-0.077736	-0.00162768	0.00214694	0.0370137
LUXS28	-0.96486	-0.923754	-0.92368	-0.895225	-0.881898	-0.87339	-0.873909				-0.0426035	-7.9689e-05	-0.0308058	-0.0148869	-0.00964809	0.000595153
LUXS29	-0.692942	-0.541794	-0.495727	-0.488514	-0.506204	-0.500064	-0.518833				-0.218124	-0.0850274	-0.0145493	0.0362103	-0.0121285	0.0375328
LUXS30	-0.848396	-0.785179	-0.813589	-0.761433	-0.802215	-0.826332	-0.845431				-0.0745136	0.0361831	-0.0641065	0.0535599	0.0300629	0.023114
LUXS31	-0.694008	-0.543517	-0.475001	-0.436711	-0.409228	-0.416201	-0.433367				-0.216843	-0.126061	-0.08061	-0.0629314	0.0170391	0.041245
LUXS32	-0.549931	-0.385655	-0.246489	-0.264071	-0.237611	-0.242699	-0.258281				-0.298722	-0.360856	0.0713314	-0.100202	0.0214159	0.0642013
LUXS33	-0.592438	-0.307593	-0.269943	-0.308761	-0.249314	-0.239585	-0.256716				-0.480802	-0.122402	0.143802	-0.192536	-0.0390212	0.071501
LUXS34	-0.518551	-0.487777	-0.486748	-0.451831	-0.433935	-0.438883	-0.457269				-0.0593448	-0.00210975	-0.0717351	-0.0396092	0.0114038	0.0418912
LUXS35											#DIV/0!	#DIV/0!	#DIV/0!	#DIV/0!	#DIV/0!	#DIV/0!
LVAS1	-0.689902	-0.771311	-0.672754	-0.616698	-0.640685	-0.694016	-0.601289				0.118001	-0.127779	-0.0833232	0.0388958	0.083241	-0.133609
LVAS2	-0.408551	-0.358866	-0.446342	-0.45135	-0.424632	-0.417824	-0.387588				-0.121614	0.243757	0.011221	-0.0591975	-0.0160323	-0.0723651
LVAS3	-0.577372	-0.530159	-0.375845	-0.296363	-0.322576	-0.53905	-0.601053				-0.0817717	-0.291072	-0.211474	0.0884473	0.67108	0.115022
LVAS4	-0.344273	-0.270296	-0.263621	-0.304808	-0.260924	-0.278131	-0.299258				-0.214879	-0.0246935	0.156234	-0.143973	0.0659468	0.0759617
LVAS5	-0.106502	-0.0723817	-0.0764389	-0.0894131	-0.0804144	-0.0655081	-0.0955085				-0.320372	0.0560525	0.169734	-0.100642	-0.185369	0.457965
LVAS6	-0.280452	-0.4391	-0.274144	-0.216794	-0.424588	-0.331137	-0.331338				0.565685	-0.37567	-0.209197	0.958488	-0.220096	0.000604348
LVAS7	-0.332603	-0.27133	-0.27884	-0.394312	-0.256292	-0.344814	-0.408247				-0.184223	0.0276809	0.414113	-0.350026	0.345393	0.183964
LVAS8	-0.135035	-0.0786058	-0.0620892	-0.0652068	-0.064166	-0.0587401	-0.0682927				-0.417886	-0.21012	0.050213	-0.0159628	-0.0845597	0.162625
LVAS9	-0.451374	-0.476085	-0.315756	-0.408935	-0.352697	-0.312935	-0.320394				0.0547458	-0.336766	0.2951	-0.137525	-0.112735	0.0238346
LVAS10	-0.453104	-0.323439	-0.34628	-0.347985	-0.35501	-0.34773	-0.398174				-0.286171	0.0706196	0.00492375	0.0201861	-0.0205066	0.145068
LVAS11	-0.570499	-0.414187	-0.416957	-0.38224	-0.533337	-0.4468	-0.453982				-0.273991	0.00668802	-0.0832639	0.395294	-0.162255	0.0160745
LVAS12	-0.759678	-0.635435	-0.640738	-0.64474	-0.694969	-0.642425	-0.699442				-0.163547	0.00834555	0.006247	0.0779051	-0.0756063	0.0887529
LVAS13	-0.424272	-0.390039	-0.38769	-0.46284	-0.51257	-0.438224	-0.505112				-0.0806861	-0.0060223	0.19384	0.107446	-0.145046	0.152633
LVAS14	-0.350441	-0.4797	-0.542486	-0.549973	-0.475118	-0.461578	-0.594733				0.368844	0.130887	0.0138005	-0.136107	-0.0284967	0.288477
LVAS15	-0.367282	-0.394422	-0.327037	-0.387935	-0.444217	-0.353579	-0.402885				0.0738936	-0.170845	0.186214	0.145081	-0.204041	0.139448
LVAS16	-0.337683	-0.327325	-0.303317	-0.288954	-0.321034	-0.308481	-0.323116				-0.0306755	-0.0733469	-0.0473524	0.111023	-0.039103	0.0474436
LVAS17	-0.830666	-0.628989	-0.660054	-0.63421	-0.662327	-0.725365	-0.78109				-0.24279	0.0493902	-0.0391546	0.0443329	0.095177	0.076824
LVAS18	-0.17282	-0.235521	-0.15284	-0.203809	-0.385651	-0.196094	-0.329727				0.36281	-0.351054	0.333478	0.892215	-0.491525	0.681478
LVAS19	-0.342987	-0.219704	-0.200495	-0.238383	-0.285856	-0.309251	-0.290958				-0.35944	-0.0874307	0.188972	0.199148	0.0818415	-0.0591527
LVAS20	-0.351307	-0.203754	-0.221413	-0.14362	-0.0941889	-0.146463	-0.183488				-0.420011	0.0866652	-0.351347	-0.34418	0.554996	0.252794
LVAS21	-0.280618	0.091308	0.156307	0.110385	-0.0515117	-0.173206	-0.257098				-1.32538	0.711864	-0.293796	-1.46666	2.36247	0.484344
LVAS22	-0.375445	-0.128916	-0.0583261	-0.169898	-0.262334	-0.283091	-0.329496				-0.65663	-0.547566	1.91289	0.544074	0.0791214	0.163922
LVAS23	-0.716124	-0.720562	-0.729847	-0.667002	-0.649407	-0.689089	-0.551441				0.00619743	0.0128864	-0.0861069	-0.0263798	0.0611046	-0.199752
LVAS24	-0.238109	-0.19739	-0.193121	-0.178059	-0.217445	-0.210697	-0.233192				-0.171011	-0.0216282	-0.0779906	0.221198	-0.0310341	0.106765
LVAS25	-0.514438	-0.497175	-0.402605	-0.346323	-0.286191	-0.287554	-0.338618				-0.0335585	-0.190214	-0.139795	-0.173628	0.00476155	0.177581
LVAS26	-0.636861	-0.58778	-0.613165	-0.550238	-0.510616	-0.531607	-0.399309				-0.0770676	0.0431887	-0.102627	-0.0720092	0.0411091	-0.248864
LVAS27	-0.246252	-0.16255	-0.157	-0.0697016	-0.286707	-0.296471	-0.365878				-0.339907	-0.0341426	-0.55604	3.11335	0.0340569	0.23411
LVAS28	-0.25848	-0.136437	-0.111312	-0.033921	-0.280027	-0.29534	-0.369262				-0.472154	-0.184156	-0.695261	7.25526	0.0546854	0.250296
LVAS29	-0.353296	-0.0822944	0.00546602	-0.0494431	-0.217082	-0.328184	-0.347263				-0.767067	-1.06642	-10.0455	3.39055	0.511795	0.0581362
LVAS30	-0.298724	-0.13144	-0.142889	-0.0381514	-0.337702	-0.356994	-0.44867				-0.559997	0.0871085	-0.733001	7.85163	0.0571291	0.2568
LVAS31	-0.314591	-0.0864327	-0.0223531	0.103015	-0.217296	-0.217952	-0.31086				-0.725254	-0.741381	-5.60852	-3.10937	0.00301808	0.426278
LVAS32	-0.535238	-0.375919	-0.371559	-0.335828	-0.423095	-0.511091	-0.5192				-0.29766	-0.0115975	-0.0961665	0.259858	0.20798	0.0158666
LVAS33	-0.54529	-0.483057	-0.469238	-0.65841	-0.435687	-0.46885	-0.429676				-0.114128	-0.0286074	0.403147	-0.338275	0.0761164	-0.083552
LVAS34	-0.216094	-0.0405036	-0.0286132	-0.0387425	-0.245912	-0.28229	-0.358288				-0.812565	-0.293565	0.354008	5.34734	0.147934	0.269219
LVAS35											#DIV/0!	#DIV/0!	#DIV/0!	#DIV/0!	#DIV/0!	#DIV/0!
MEXS1	-0.438595	-0.441641	-0.410362	-0.423537	-0.38043	-0.403377	-0.38922				0.00694515	-0.0708236	0.0321057	-0.10178	0.0603191	-0.0350948
MEXS2	-0.311304	-0.288903	-0.249909	-0.292051	-0.300006	-0.262622	-0.177624				-0.0719571	-0.134973	0.168631	0.0272371	-0.124612	-0.323649
MEXS3	-0.404214	-0.445341	-0.37216	-0.351967	-0.292443	-0.333675	-0.316622				0.101745	-0.164325	-0.0542592	-0.169119	0.140992	-0.0511072
MEXS4	-0.492991	-0.4898	-0.434186	-0.35521	-0.383083	-0.408219	-0.327123				-0.0064722	-0.113544	-0.181895	0.0784672	0.0656161	-0.198659
MEXS5	-0.278148	-0.25769	-0.252752	-0.252809	-0.238878	-0.242544	-0.235139				-0.0735507	-0.0191608	0.000224814	-0.0551047	0.0153471	-0.0305317
MEXS6	-0.331478	-0.29691	-0.290856	-0.317805	-0.301232	-0.303127	-0.284519				-0.104284	-0.0203897	0.0926536	-0.052149	0.00628893	-0.0613852
MEXS7	-0.603312	-0.56311	-0.616239	-0.605438	-0.566827	-0.528583	-0.445041				-0.0666355	0.0943498	-0.0175272	-0.0637736	-0.0674705	-0.158049
MEXS8	-0.425552	-0.469315	-0.345335	-0.22098	0.0541015	0.139258	0.194172				0.10284	-0.264172	-0.360101	-1.24483	1.57401	0.394334
MEXS9	-0.778133	-0.769188	-0.738684	-0.743348	-0.714653	-0.710668	-0.665547				-0.0114955	-0.0396577	0.00631449	-0.0386018	-0.00557591	-0.0634922
MEXS10	-0.643732	-0.605319	-0.578817	-0.577084	-0.580357	-0.553541	-0.506728				-0.0596726	-0.0437816	-0.0029938	0.00567041	-0.0462064	-0.0845691
MEXS11	-0.321801	-0.343227	-0.286356	-0.239181	-0.149706	-0.140796	-0.0928624				0.0665816	-0.165698	-0.16474	-0.374091	-0.0595189	-0.340445
MEXS12	-0.658857	-0.669186	-0.614308	-0.627878	-0.569793	-0.552702	-0.398576				0.0156771	-0.0820061	0.0220891	-0.0925097	-0.0299954	-0.278858
MEXS13	-0.493023	-0.465088	-0.398543	-0.406793	-0.456471	-0.433676	-0.300008				-0.0566601	-0.143081	0.0207002	0.122123	-0.0499383	-0.308222
MEXS14	-0.829101	-0.884872	-0.874648	-0.863108	-0.886801	-0.864084	-0.825124				0.0672668	-0.0115538	-0.0131936	0.0274508	-0.0256168	-0.0450881
MEXS15	-0.789807	-0.776384	-0.745754	-0.753273	-0.701257	-0.709926	-0.689633				-0.0169955	-0.0394516	0.0100823	-0.0690537	0.0123621	-0.0285843
MEXS16	-0.317694	-0.285308	-0.178019	-0.194633	-0.357239	-0.355602	-0.234512				-0.101942	-0.376048	0.0933274	0.835453	-0.00458395	-0.34052
MEXS17	-0.450819	-0.429993	-0.393892	-0.361627	-0.417207	-0.384248	-0.372001				-0.046197	-0.0839554	-0.0819154	0.153695	-0.0789995	-0.0318711
MEXS18	-0.382623	-0.410712	-0.276091	-0.291351	-0.350058	-0.41576	-0.0010686				0.0734118	-0.327774	0.0552721	0.201499	0.187689	-0.99743
MEXS19	-0.250712	-0.229546	-0.200026	-0.133789	-0.135915	-0.106675	-0.094104				-0.0844236	-0.128604	-0.33114	0.015892	-0.215136	-0.117844
MEXS20	0.00355405	-0.0131862	0.00206633	0.137898	0.111097	0.0789334	0.163345				-4.7102	-1.1567	65.7358	-0.194359	-0.289507	1.0694
MEXS21	0.0125288	-0.0122944	-0.0251283	0.0291829	0.10589	0.0323163	0.123448				-1.98129	1.04388	-2.16136	2.62849	-0.694812	2.82
MEXS22	-0.34523	-0.353224	-0.33335	-0.373862	-0.347331	-0.375616	-0.367335				0.0231579	-0.0562651	0.121529	-0.0709643	0.0814361	-0.0220483
MEXS23	-0.522934	-0.521531	-0.448467	-0.343502	-0.423675	-0.43679	-0.53093				-0.00268369	-0.140095	-0.234054	0.2334	0.0309562	0.215526
MEXS24	-0.189714	-0.184081	-0.178516	-0.165446	-0.150523	-0.14314	-0.134303				-0.029692	-0.0302334	-0.0732102	-0.0902009	-0.0490495	-0.0617382
MEXS25	-0.456586	-0.464243	-0.397116	-0.372881	-0.172007	-0.0956413	0.105718				0.0167707	-0.144594	-0.0610274	-0.53871	-0.443967	-2.10536
MEXS26	-0.221059	-0.174506	-0.144292	-0.0706991	-0.110142	-0.210106	-0.122288				-0.210592	-0.173139	-0.510028	0.557903	0.90759	-0.417973
MEXS27	-0.408875	-0.208001	-0.164185	-0.0359566	-0.187736	-0.0177877	-0.0191091				-0.491286	-0.210652	-0.780999	4.22119	-0.905251	0.0742855
MEXS28	-0.234065	0.0382426	0.0331218	0.0846402	0.0969578	0.123021	0.0832569				-1.16338	-0.133904	1.55542	0.145528	0.268814	-0.323232
MEXS29											#DIV/0!	#DIV/0!	#DIV/0!	#DIV/0!	#DIV/0!	#DIV/0!
MEXS30	-0.256603	-0.236253	-0.161803	-0.100378	-0.0678668	-0.0540435	-0.0169498				-0.0793034	-0.315131	-0.379626	-0.323889	-0.203682	-0.686368
MEXS31	-0.101708	-0.154165	-0.0560431	0.0093804	-0.113241	-0.18103	-0.215091				0.515764	-0.636473	-1.16738	-13.072	0.598635	0.188147
MEXS32	-0.257726	-0.226166	-0.192549	-0.0872675	-0.251708	-0.331299	-0.119674				-0.122457	-0.148639	-0.546777	1.88432	0.316207	-0.638774
MEXS33	-0.110005	-0.0872794	-0.0201581	0.123593	-0.245563	-0.308797	-0.0808462				-0.206589	-0.769039	-7.13119	-2.98686	0.257506	-0.738189
MEXS34	-0.239221	-0.169735	-0.128857	0.0885654	0.097943	0.0951716	0.121951				-0.290468	-0.240836	-1.68732	0.105883	-0.0282955	0.281384
MEXS35											#DIV/0!	#DIV/0!	#DIV/0!	#DIV/0!	#DIV/0!	#DIV/0!
MLTS1	-0.163626	-0.165422	-0.221947	-0.0878327	-0.243076	-0.318837	-0.229172				0.0109728	0.341704	-0.604263	1.76749	0.311674	-0.281225
MLTS2	-0.262106	-0.160168	-0.265697	-0.162042	-0.199632	-0.193756	-0.231572				-0.388918	0.658865	-0.390125	0.231976	-0.0294341	0.195172
MLTS3	-0.229827	-0.226273	-0.291152	-0.0239521	-0.331219	-0.452894	-0.320463				-0.0154635	0.286729	-0.917733	12.8284	0.367352	-0.292411
MLTS4	-0.172684	-0.27497	-0.235849	-0.202142	-0.199713	-0.173389	-0.154655				0.592325	-0.142274	-0.142916	-0.0120163	-0.131811	-0.108044
MLTS5	-0.0980973	-0.104664	-0.0767027	-0.065937	-0.0545827	-0.0467262	-0.0538342				0.066942	-0.267154	-0.140356	-0.1722	-0.143937	0.15212
MLTS6	-0.115477	-0.0685857	-0.0503473	-0.0398171	-0.0644083	-0.0807212	-0.0672394				-0.406064	-0.265922	-0.209151	0.617604	0.253273	-0.167017
MLTS7	-0.496684	-0.326554	-0.309254	-0.311275	-0.330381	-0.317855	-0.3327				-0.342531	-0.0529782	0.00653623	0.061378	-0.0379121	0.0467015
MLTS8	-0.688761	-0.331209	-0.327317	-0.513743	-0.351392	-0.409241	-0.252872				-0.519123	-0.0117519	0.569559	-0.316016	0.164627	-0.382096
MLTS9	-0.432374	-0.261545	-0.244665	-0.417174	-0.366088	-0.445985	-0.289818				-0.395096	-0.0645371	0.705078	-0.122456	0.218245	-0.350163
MLTS10	-0.314268	-0.280184	-0.233981	-0.250128	-0.304928	-0.326881	-0.254057				-0.108455	-0.164904	0.0690115	0.219087	0.0719936	-0.222784
MLTS11	-0.403527	-0.33534	-0.283753	-0.244545	-0.250723	-0.304767	-0.235996				-0.168977	-0.153835	-0.138178	0.0252665	0.215551	-0.225651
MLTS12	-0.313139	-0.32118	-0.308613	-0.298421	-0.351945	-0.333723	-0.31996				0.0256798	-0.039129	-0.033024	0.179357	-0.0517758	-0.0412394
MLTS13	-0.596859	-0.715723	-0.637731	-0.423085	-0.432315	-0.531216	-0.545501				0.199148	-0.108969	-0.336579	0.0218178	0.228769	0.0268919
MLTS14	-0.50159	-0.403265	-0.432419	-0.279378	-0.451604	-0.505022	-0.38955				-0.196025	0.0722939	-0.353919	0.616464	0.118283	-0.228647
MLTS15	-0.397022	-0.403033	-0.262342	-0.289752	-0.327265	-0.327784	-0.249699				0.015141	-0.34908	0.104483	0.129463	0.00158824	-0.238222
MLTS16	-0.415414	-0.317396	-0.307619	-0.310327	-0.313372	-0.297535	-0.310265				-0.235954	-0.0308027	0.00880463	0.00980939	-0.0505368	0.0427847
MLTS17	-0.346958	-0.638282	-0.562245	-0.395057	-0.46725	-0.458619	-0.527967				0.839653	-0.119127	-0.297359	0.182743	-0.0184727	0.15121
MLTS18	-0.533413	-0.440614	-0.328257	-0.257017	-0.28954	-0.404342	-0.241248				-0.173973	-0.255	-0.217026	0.12654	0.396498	-0.403356
MLTS19	-0.301447	-0.280888	-0.254819	-0.195651	-0.218699	-0.24443	-0.297637				-0.068202	-0.0928097	-0.232194	0.117799	0.117656	0.217675
MLTS20	-0.472869	-0.443761	-0.475472	-0.33869	-0.372785	-0.369324	-0.500391				-0.0615552	0.0714601	-0.287676	0.100668	-0.00928516	0.354883
MLTS21	-0.44618	-0.440309	-0.40214	-0.406659	-0.447901	-0.449283	-0.455194				-0.0131595	-0.0866876	0.0112373	0.101419	0.0030856	0.0131566
MLTS22	-0.3585	-0.242444	-0.179638	-0.300816	-0.328981	-0.258409	-0.206114				-0.323725	-0.259054	0.674567	0.0936287	-0.214518	-0.202373
MLTS23	-0.54368	-0.239927	-0.225953	-0.225516	-0.186225	-0.236312	-0.277235				-0.558698	-0.0582452	-0.0019333	-0.174228	0.268965	0.173173
MLTS24	-0.373488	-0.176846	-0.176353	-0.172348	-0.170533	-0.164422	-0.204206				-0.5265	-0.0027925	-0.0227046	-0.0105331	-0.035837	0.241966
MLTS25	-0.380143	-0.222921	-0.216552	-0.198983	-0.144634	-0.218491	-0.246117				-0.413586	-0.0285706	-0.081131	-0.273134	0.510652	0.126438
MLTS26	-0.473741	-0.309179	-0.192896	-0.230899	-0.211875	-0.300497	-0.384697				-0.347367	-0.376102	0.197012	-0.0823887	0.418271	0.280204
MLTS27	-0.685932	-0.721711	-0.628501	-0.500144	-0.713437	-0.701006	-0.796795				0.0521615	-0.129152	-0.204228	0.426464	-0.017424	0.136644
MLTS28	-0.97555	-0.926417	-0.941356	-0.915465	-0.908147	-0.919512	-0.935671				-0.0503652	0.0161255	-0.027503	-0.00799369	0.0125144	0.0175727
MLTS29	-0.504166	-0.578055	-0.509769	-0.506992	-0.626698	-0.601696	-0.613518				0.146557	-0.118131	-0.00544752	0.236109	-0.0398946	0.0196483
MLTS30	-0.834438	-0.753548	-0.777778	-0.709113	-0.709537	-0.68168	-0.70274				-0.0969395	0.0321552	-0.0882834	0.000597092	-0.0392602	0.0308936
MLTS31	-0.629775	-0.483406	-0.392349	-0.440831	-0.547239	-0.545386	-0.619414				-0.232416	-0.188364	0.123568	0.24138	-0.00338619	0.135736
MLTS32	-0.346885	-0.305542	-0.333206	-0.307279	-0.287386	-0.280298	-0.314586				-0.119185	0.0905393	-0.07781	-0.0647382	-0.024663	0.122325
MLTS33	-0.667209	-0.557474	-0.507658	-0.615039	-0.621433	-0.609195	-0.630705				-0.16447	-0.0893598	0.211523	0.0103961	-0.0196939	0.0353089
MLTS34	-0.819436	-0.827647	-0.672981	-0.658528	-0.869456	-0.830942	-0.93007				0.0100196	-0.186875	-0.0214751	0.320302	-0.0442959	0.119295
MLTS35											#DIV/0!	#DIV/0!	#DIV/0!	#DIV/0!	#DIV/0!	#DIV/0!
NETS1	-0.47337	0.0587558	-0.248875	-0.419297	-0.387006	-0.419623	-0.318051				-1.12412	-5.23574	0.68477	-0.0770119	0.0842809	-0.242055
NETS2	-0.263702	-0.150298	-0.245881	-0.270823	-0.253958	-0.27067	-0.244562				-0.430046	0.63596	0.101437	-0.0622711	0.0658052	-0.0964569
NETS3	-0.596391	0.0638578	-0.278616	-0.555827	-0.542771	-0.591131	-0.525674				-1.10707	-5.36307	0.994959	-0.0234895	0.0890969	-0.110732
NETS4	-0.162611	-0.11345	-0.139867	-0.145821	-0.142147	-0.151447	-0.168635				-0.302324	0.232854	0.0425714	-0.0252002	0.0654259	0.113493
NETS5	-0.0758093	-0.064839	-0.075521	-0.0868741	-0.0633683	-0.0674355	-0.0726268				-0.144709	0.164746	0.150331	-0.270573	0.0641825	0.0769828
NETS6	-0.175053	-0.10217	-0.133014	-0.142503	-0.13597	-0.145653	-0.147339				-0.41635	0.301892	0.0713375	-0.0458428	0.0712169	0.0115713
NETS7	-0.384199	-0.154434	-0.253583	-0.28134	-0.261535	-0.291173	-0.309807				-0.598037	0.642017	0.10946	-0.0703937	0.113322	0.063997
NETS8	-0.243942	0.0446669	-0.255476	-0.211299	-0.39643	-0.626951	-0.57541				-1.1831	-6.71958	-0.172921	0.876158	0.581492	-0.0822099
NETS9	-0.54964	-0.497843	-0.543931	-0.460762	-0.511201	-0.468367	-0.415358				-0.0942372	0.0925747	-0.152903	0.109467	-0.0837912	-0.113178
NETS10	-0.25118	-0.137108	-0.209215	-0.228562	-0.221071	-0.22933	-0.257103				-0.454146	0.525919	0.0924736	-0.0327761	0.0373595	0.121106
NETS11	-0.184331	-0.118099	-0.177857	-0.195367	-0.174075	-0.185887	-0.214462				-0.359312	0.506005	0.0984472	-0.108983	0.0678569	0.153718
NETS12	-0.483225	-0.454108	-0.505339	-0.444474	-0.323474	-0.42693	-0.322617				-0.0602572	0.112819	-0.120444	-0.272233	0.319829	-0.244333
NETS13	-0.523317	-0.417837	-0.477553	-0.404707	-0.393295	-0.389082	-0.399809				-0.201559	0.142917	-0.152541	-0.0281965	-0.0107143	0.0275708
NETS14	-0.744547	-0.0344234	-0.20419	-0.221691	-0.220408	-0.296885	-0.311971				-0.953766	4.93174	0.0857082	-0.00578668	0.346976	0.0508137
NETS15	-0.375175	-0.084913	-0.237084	-0.269371	-0.257388	-0.299865	-0.324725				-0.773671	1.79208	0.136181	-0.0444845	0.165032	0.0829019
NETS16	-0.198722	-0.0573151	-0.176462	-0.19665	-0.184459	-0.211339	-0.218604				-0.711582	2.07881	0.114401	-0.0619904	0.145718	0.0343785
NETS17	-0.405192	-0.121385	-0.241116	-0.262909	-0.226576	-0.274297	-0.308452				-0.700426	0.986373	0.0903867	-0.138196	0.210617	0.124518
NETS18	-0.558159	-0.000440877	-0.217826	-0.236379	-0.31928	-0.314025	-0.316543				-0.99921	493.076	0.0851711	0.350712	-0.0164567	0.00801621
NETS19	-0.266218	-0.107546	-0.208387	-0.243504	-0.247863	-0.275612	-0.302668				-0.596022	0.937654	0.168516	0.0179032	0.11195	0.0981659
NETS20	-0.50879	0.0759191	-0.155136	-0.122361	-0.0777278	-0.237825	-0.228189				-1.14921	-3.04344	-0.211266	-0.364766	2.05972	-0.0405201
NETS21	-0.256639	0.236632	-0.0292845	-0.0357868	-0.0335962	-0.140138	-0.175385				-1.92204	-1.12376	0.222037	-0.0612126	3.17124	0.251519
NETS22	-0.346342	0.115757	-0.0669879	-0.254207	-0.214921	-0.236697	-0.2327				-1.33423	-1.5787	2.79481	-0.154543	0.101322	-0.0168855
NETS23	-0.335343	-0.0997381	-0.243685	-0.280546	-0.262294	-0.31937	-0.327752				-0.702579	1.44325	0.151264	-0.0650592	0.217602	0.0262459
NETS24	-0.350639	-0.106175	-0.200491	-0.259586	-0.253065	-0.266621	-0.290756				-0.697195	0.888303	0.294749	-0.0251205	0.0535686	0.0905215
NETS25	-0.260724	-0.0805528	-0.195647	-0.184821	-0.224402	-0.217925	-0.182557				-0.691041	1.4288	-0.0553315	0.214157	-0.0288664	-0.162293
NETS26	-0.371007	-0.0177643	-0.230163	-0.26195	-0.228315	-0.302584	-0.302604				-0.952119	11.9565	0.138103	-0.128401	0.325293	6.36363e-05
NETS27	-0.543036	-0.154413	-0.261809	-0.285937	-0.272598	-0.313218	-0.315855				-0.715649	0.695513	0.0921607	-0.046652	0.149012	0.00842015
NETS28	-0.507437	-0.0214348	-0.221017	-0.192693	-0.158024	-0.292974	-0.276943				-0.957759	9.31113	-0.128157	-0.179916	0.853986	-0.0547208
NETS29	0.00842368	0.361255	0.190247	0.196915	0.173443	-0.0306987	-0.0322989				41.8857	-0.473372	0.0350475	-0.119198	-1.177	0.0521252
NETS30	-0.65418	0.100358	-0.192433	-0.15906	-0.109434	-0.30236	-0.290016				-1.15341	-2.91747	-0.173427	-0.311996	1.76295	-0.0408236
NETS31	-0.496598	0.0331301	-0.177085	-0.146692	-0.121332	-0.260976	-0.265941				-1.06671	-6.34514	-0.171631	-0.172877	1.15093	0.0190249
NETS32	-0.43265	-0.11445	-0.274941	-0.281428	-0.263954	-0.338787	-0.340549				-0.735468	1.40229	0.0235967	-0.0620912	0.283507	0.00520206
NETS33	-0.264823	0.00498501	-0.190876	-0.216043	-0.220431	-0.304372	-0.311668				-1.01882	-39.29	0.131849	0.0203088	0.380807	0.0239681
NETS34	-0.479051	-0.115835	-0.276592	-0.284688	-0.264301	-0.333193	-0.337434				-0.7582	1.38781	0.0292727	-0.0716122	0.260657	0.0127299
NETS35											#DIV/0!	#DIV/0!	#DIV/0!	#DIV/0!	#DIV/0!	#DIV/0!
NORS1	0.305596	0.329785	0.465324	0.564635	0.589073	0.565668	0.528623				0.0791534	0.410992	0.213424	0.0432815	-0.0397327	-0.0654877
NORS2	0.157632	0.43818	0.474504	0.493711	0.511016	0.520034	0.529681				1.77976	0.0828971	0.0404778	0.0350505	0.017647	0.0185512
NORS3	0.515409	0.534716	0.628681	0.702165	0.694437	0.68003	0.653565				0.0374582	0.175729	0.116886	-0.011005	-0.0207468	-0.0389165
NORS4	-0.075835	-0.0379792	-0.0374897	0.0164486	0.0137523	-0.0098357	-0.0106818				-0.499187	-0.0128889	-1.43875	-0.163926	-1.71521	0.086028
NORS5	-0.0469669	-0.0459669	-0.0483737	-0.0356977	-0.0387897	-0.0402408	-0.0478527				-0.0212906	0.0523575	-0.262043	0.086616	0.0374112	0.189158
NORS6	0.0402446	0.0582873	0.153404	0.248953	0.281448	0.248286	0.195854				0.448327	1.63186	0.622857	0.130526	-0.117825	-0.211176
NORS7	-0.0206597	0.123915	0.137119	0.240243	0.189762	0.157992	0.145459				-6.9979	0.106559	0.752074	-0.210125	-0.167416	-0.0793277
NORS8	0.254839	0.491896	0.542048	0.501547	0.545346	0.550656	0.559804				0.930223	0.101958	-0.0747195	0.087328	0.00973751	0.0166136
NORS9	0.0379581	0.346919	0.331831	0.348243	0.416198	0.426963	0.419984				8.13952	-0.0434913	0.0494587	0.195137	0.025864	-0.0163451
NORS10	-0.0844302	-0.00909332	-0.0122819	0.0496651	0.0622398	0.0300567	0.0132019				-0.892298	0.350651	-5.04376	0.253192	-0.517083	-0.560767
NORS11	-0.0475779	0.225143	0.228917	0.196919	0.274089	0.276409	0.273673				-5.7321	0.0167628	-0.139783	0.391887	0.00846633	-0.00989891
NORS12	-0.451984	-0.358182	-0.311811	-0.355172	-0.00975948	0.0368519	-0.193192				-0.207532	-0.129464	0.139064	-0.972522	-4.77601	-6.24239
NORS13	0.0687586	0.0538896	0.165649	0.14489	0.213724	0.0058506	-0.0694517				-0.21625	2.07386	-0.125321	0.475076	-0.972625	-12.8709
NORS14	-0.0575756	0.0942652	0.0247076	0.108978	0.117741	0.0789702	0.0775165				-2.63724	-0.737893	3.4107	0.0804132	-0.32929	-0.0184085
NORS15	-0.0165523	0.11719	0.214801	0.200938	0.24219	0.249854	0.2994				-8.08	0.832927	-0.0645394	0.205296	0.0316454	0.198298
NORS16	-0.0844199	-0.0174767	-0.0100659	0.0517407	0.0627251	0.0166146	0.00662085				-0.792979	-0.424039	-6.1402	0.212296	-0.73512	-0.601504
NORS17	-0.025467	0.157431	0.179794	0.451494	0.42401	0.379811	0.387143				-7.18179	0.142043	1.51118	-0.0608722	-0.104242	0.0193049
NORS18	0.119775	0.59197	0.608446	0.677449	0.663305	0.600014	0.615367				3.94235	0.0278323	0.113409	-0.0208782	-0.0954178	0.0255868
NORS19	-0.127951	0.167582	-0.114698	0.0011232	0.0551008	-0.0207496	0.323465				-2.30973	-1.68443	-1.00979	48.0571	-1.37657	-16.589
NORS20	0.185902	0.396482	0.438215	0.543403	0.551606	0.494046	0.483657				1.13275	0.105257	0.240038	0.0150944	-0.10435	-0.021027
NORS21	0.129673	0.490813	0.503503	0.598911	0.577215	0.494777	0.510106				2.785	0.0258546	0.189488	-0.0362253	-0.142821	0.0309819
NORS22	0.102353	0.433014	0.448462	0.509291	0.486088	0.465993	0.492082				3.2306	0.0356736	0.135641	-0.04556	-0.0413391	0.055984
NORS23	-0.151407	0.234603	0.254467	0.380837	0.337145	0.301147	0.281122				-2.54949	0.084672	0.496607	-0.114727	-0.106773	-0.0664968
NORS24	-0.476875	-0.358725	0.34571	0.255836	0.279933	0.0839307	-0.0576095				-0.247758	-1.96372	-0.259969	0.0941902	-0.700176	-1.68639
NORS25	-0.364286	-0.0869631	0.224891	-0.0902015	0.0726378	0.0777299	0.114201				-0.761278	-3.58605	-1.40109	-1.80528	0.0701031	0.469204
NORS26	0.201954	0.164365	0.296377	-0.0355646	0.198386	0.216243	0.275681				-0.186128	0.803169	-1.12	-6.57819	0.0900115	0.274866
NORS27	-0.0257923	0.244376	0.249135	0.356086	0.337918	0.304759	0.296484				-10.4748	0.0194724	0.429288	-0.0510195	-0.0981293	-0.0271525
NORS28	0.130317	0.331575	0.370653	0.482894	0.446213	0.402125	0.398266				1.54436	0.117858	0.302818	-0.0759603	-0.098805	-0.00959682
NORS29	0.200598	0.606566	0.615926	0.70956	0.673987	0.618132	0.636324				2.02379	0.0154304	0.152022	-0.0501336	-0.0828731	0.0294302
NORS30	0.227429	0.436745	0.459999	0.585669	0.54967	0.515044	0.510308				0.920356	0.0532433	0.273197	-0.0614668	-0.0629936	-0.00919543
NORS31	0.180264	0.621008	0.640616	0.713562	0.675995	0.619112	0.638019				2.44499	0.0315741	0.113869	-0.0526476	-0.0841472	0.0305383
NORS32	0.00774786	0.178956	0.197338	0.294442	0.254111	0.224103	0.219227				22.0974	0.102722	0.492066	-0.136972	-0.118091	-0.0217585
NORS33	0.121112	0.326209	0.347949	0.481497	0.427447	0.346537	0.334912				1.69344	0.0666432	0.383815	-0.112253	-0.189286	-0.0335464
NORS34	0.153453	0.356338	0.380534	0.367352	0.326729	0.299488	0.306585				1.32213	0.0679019	-0.0346407	-0.110582	-0.0833767	0.0236992
NORS35											#DIV/0!	#DIV/0!	#DIV/0!	#DIV/0!	#DIV/0!	#DIV/0!
POLS1	0.23675	0.351173	0.352202	0.380273	0.30216	-0.0572052	0.235995				0.483311	0.00293046	0.0796998	-0.205413	-1.18932	-5.12541
POLS2	-0.120147	0.0465382	0.0533726	0.126061	0.16436	0.17531	0.0209543				-1.38734	0.146856	1.3619	0.303815	0.0666244	-0.880473
POLS3	0.448157	0.540065	0.566205	0.563628	0.496004	0.140042	0.430729				0.205081	0.0484003	-0.00455108	-0.119979	-0.71766	2.07572
POLS4	-0.224947	-0.0138733	-0.218523	-0.420969	-0.218743	-0.253492	-0.0406039				-0.938327	14.7514	0.926424	-0.480382	0.158857	-0.839822
POLS5	-0.0331741	-0.0421518	-0.0495115	-0.0373734	-0.0241843	-0.0663825	-0.0360533				0.270624	0.174599	-0.245157	-0.352901	1.74486	-0.456885
POLS6	-0.00846909	-0.0103286	0.0221153	0.085612	0.0635625	-0.0996042	-0.0635347				0.219567	-3.14117	2.87117	-0.257552	-2.56703	-0.362128
POLS7	-0.276861	-0.125407	-0.0814203	0.0430463	0.000615093	-0.00715849	-0.0527834				-0.547039	-0.350752	-1.52869	-0.985711	-12.6381	6.37353
POLS8	-0.709605	-0.617395	-0.53774	-0.591845	-0.734465	-0.693165	-0.765042				-0.129946	-0.129019	0.100615	0.240977	-0.0562323	0.103695
POLS9	-0.416754	-0.261454	-0.172654	-0.204406	-0.229652	-0.261331	-0.0785281				-0.372641	-0.339639	0.183904	0.123507	0.137945	-0.699507
POLS10	-0.403921	-0.250728	-0.132641	-0.307728	-0.358805	-0.24268	-0.0180757				-0.379264	-0.470977	1.32001	0.165981	-0.323644	-0.925516
POLS11	-0.0724617	0.0162321	0.046281	0.109362	0.0730627	0.199883	0.0387741				-1.22401	1.8512	1.36301	-0.331921	1.73578	-0.806016
POLS12	-0.438076	-0.408714	-0.155973	-0.190346	-0.157267	-0.0631703	-0.0284978				-0.0670249	-0.618381	0.220378	-0.173781	-0.598325	-0.548873
POLS13	-0.272892	-0.239686	0.0091037	0.0873221	0.0541936	-0.0430922	0.0183601				-0.121679	-1.03798	8.59193	-0.379383	-1.79515	-1.42607
POLS14	-0.58563	-0.742128	-0.748937	-0.745139	-0.78655	-0.692379	-0.629036				0.267231	0.00917522	-0.00507139	0.0555746	-0.119727	-0.0914855
POLS15	-0.567051	-0.651632	-0.603261	-0.594735	-0.536628	-0.58362	-0.544784				0.14916	-0.0742299	-0.0141345	-0.0977019	0.0875693	-0.0665436
POLS16	0.0793198	0.128084	0.13544	0.164089	0.176075	0.144923	0.0150376				0.614776	0.0574338	0.211525	0.0730491	-0.176927	-0.896237
POLS17	-0.271724	-0.0473464	0.10094	0.391768	0.312267	0.419008	0.336543				-0.825756	-3.13194	2.8812	-0.20293	0.341829	-0.19681
POLS18	0.208129	0.271592	0.433791	0.528019	0.486414	0.430934	0.390599				0.304923	0.597214	0.217222	-0.0787961	-0.114058	-0.0935994
POLS19	0.131067	0.0793647	0.216515	0.232751	0.243799	0.163039	0.0704267				-0.394473	1.7281	0.0749883	0.0474647	-0.331255	-0.568038
POLS20	0.139533	0.338862	0.389256	0.477244	0.359891	0.352306	0.109011				1.42855	0.148714	0.226042	-0.245897	-0.0210752	-0.690578
POLS21	0.271192	0.332736	0.391995	0.429503	0.380621	0.289281	0.231017				0.226939	0.178097	0.095686	-0.113811	-0.239977	-0.201408
POLS22	0.148008	0.290385	0.307225	0.275003	0.213823	-0.095144	0.188045				0.961952	0.0579918	-0.10488	-0.222473	-1.44497	-2.97642
POLS23	-0.363406	-0.0638704	0.0928867	0.215384	-0.009078	0.0980059	-0.250528				-0.824245	-2.4543	1.31878	-1.04215	-11.796	-3.55625
POLS24	-0.05591	-0.056071	-0.0566722	-0.0285981	-0.0143412	-0.0424547	-0.0800984				0.00287973	0.0107222	-0.495378	-0.498526	1.96033	0.88668
POLS25	-0.0304174	0.0506014	0.119093	-0.00154633	0.0849116	0.0884472	-0.0986939				-2.66357	1.35355	-1.01298	-55.9117	0.0416388	-2.11585
POLS26	-0.0491124	0.223627	0.274861	0.337701	0.258241	0.31048	0.0294715				-5.55338	0.229104	0.228623	-0.235296	0.202287	-0.905078
POLS27	0.0442826	0.199434	0.279159	0.348649	0.330569	0.287283	0.178065				3.50365	0.39976	0.248927	-0.0518577	-0.130944	-0.380175
POLS28	0.198979	0.195473	0.301642	0.332235	0.31117	0.24851	0.145999				-0.0176202	0.543135	0.101423	-0.0634049	-0.201367	-0.412504
POLS29	0.129513	0.345865	0.465628	0.535359	0.513128	0.436808	0.379784				1.67051	0.346274	0.149755	-0.0415245	-0.148735	-0.130547
POLS30	0.284919	0.313091	0.40983	0.463807	0.418947	0.405517	0.282399				0.0988772	0.308983	0.131706	-0.0967221	-0.0320569	-0.303606
POLS31	0.0949166	0.0979066	0.276994	0.358357	0.306599	0.294138	0.224566				0.0315016	1.82916	0.293736	-0.144431	-0.0406417	-0.23653
POLS32	-0.026646	0.0787973	0.172497	0.188283	0.164444	0.104576	0.0230689				-3.95719	1.18912	0.0915189	-0.126611	-0.364068	-0.779404
POLS33	-0.0462141	0.177212	0.263607	0.312559	0.281744	0.229757	0.13412				-4.83459	0.487526	0.185699	-0.098591	-0.184516	-0.416253
POLS34	0.269441	0.187515	0.323797	0.367613	0.343331	0.297067	0.174534				-0.304059	0.726777	0.13532	-0.0660544	-0.134749	-0.412475
POLS35											#DIV/0!	#DIV/0!	#DIV/0!	#DIV/0!	#DIV/0!	#DIV/0!
PORS1	-0.338422	-0.12813	-0.233548	-0.145196	-0.301135	-0.298731	-0.205537				-0.621391	0.822748	-0.378304	1.07399	-0.0079839	-0.311964
PORS2	-0.336055	-0.24302	-0.242132	-0.2865	-0.254039	-0.300519	-0.26513				-0.276845	-0.00365435	0.183242	-0.113304	0.182966	-0.117761
PORS3	-0.303127	-0.0254108	-0.137009	-0.0235014	-0.282982	-0.287839	-0.135511				-0.916171	4.39176	-0.828468	11.0411	0.0171613	-0.529211
PORS4	-0.106199	0.0569466	-0.0463564	0.0405496	-0.124779	-0.194303	0.186844				-1.53623	-1.81403	-1.87474	-4.07719	0.55718	-1.96161
PORS5	-0.202615	-0.0155786	0.0782333	0.121376	0.140661	0.0921986	0.135352				-0.923112	-6.02186	0.551466	0.158884	-0.344534	0.468049
PORS6	-0.296938	-0.160438	-0.236488	-0.193383	-0.286059	-0.279607	-0.246804				-0.459693	0.474019	-0.182271	0.479232	-0.0225557	-0.117318
PORS7	-0.425099	-0.410414	-0.326239	-0.297065	-0.326326	-0.431264	-0.350166				-0.0345443	-0.205097	-0.0894272	0.0985014	0.321575	-0.188048
PORS8	-0.926168	-0.871673	-0.908775	-0.889528	-0.887048	-0.89766	-0.85606				-0.0588397	0.0425651	-0.021179	-0.00278872	0.0119639	-0.0463433
PORS9	-0.54463	-0.453127	-0.443331	-0.312477	-0.340426	-0.450709	-0.408233				-0.16801	-0.021618	-0.295161	0.0894419	0.323956	-0.0942427
PORS10	-0.501524	-0.483041	-0.48742	-0.341102	-0.407116	-0.476627	-0.417517				-0.0368534	0.0090643	-0.300189	0.193534	0.170738	-0.124017
PORS11	-0.412409	-0.390153	-0.16277	-0.213243	-0.173197	-0.291752	-0.217267				-0.0539653	-0.582805	0.310091	-0.187795	0.684511	-0.255304
PORS12	-0.738851	-0.703741	-0.634461	-0.607464	-0.666477	-0.70652	-0.667391				-0.0475196	-0.098445	-0.042551	0.0971462	0.060082	-0.0553822
PORS13	-0.417232	-0.441214	-0.425135	-0.315031	-0.407796	-0.524108	-0.508046				0.0574778	-0.0364427	-0.258986	0.294463	0.285221	-0.0306461
PORS14	-0.478764	-0.499058	-0.454423	-0.465633	-0.567695	-0.601724	-0.605851				0.0423899	-0.0894395	0.0246691	0.219191	0.0599422	0.00685743
PORS15	-0.775568	-0.821442	-0.777452	-0.784597	-0.755266	-0.783358	-0.748707				0.059149	-0.0535522	0.00919104	-0.0373832	0.0371938	-0.0442339
PORS16	-0.13852	0.0115002	0.038775	0.125469	0.0237924	0.013211	0.0940192				-1.08302	2.37168	2.23581	-0.810372	-0.444736	6.11671
PORS17	-0.786627	-0.687527	-0.543647	-0.665714	-0.625698	-0.710113	-0.598782				-0.125981	-0.209271	0.224533	-0.0601094	0.134914	-0.15678
PORS18	-0.270406	-0.275111	-0.179101	-0.0288255	-0.174493	-0.256827	-0.145063				0.017398	-0.348986	-0.839054	5.05341	0.471851	-0.435174
PORS19	-0.0268869	-0.0936368	0.19671	0.145789	0.154987	0.0332503	0.0716794				2.48262	-3.10078	-0.258867	0.0630952	-0.785464	1.15575
PORS20	-0.134893	0.247407	0.340177	0.388757	0.388782	0.340392	0.424517				-2.8341	0.374969	0.142808	6.31827e-05	-0.124464	0.247142
PORS21	-0.120836	-0.00481223	0.252738	0.144412	0.193089	0.0237282	0.175256				-0.960176	-53.5199	-0.42861	0.337068	-0.877112	6.38597
PORS22	-0.216444	0.0967767	0.0423509	0.00834348	-0.161921	-0.0640783	0.0987364				-1.44712	-0.562386	-0.802991	-20.4069	-0.604263	-2.54087
PORS23	-0.680506	-0.442643	-0.345207	0.0414815	-0.248424	-0.285881	-0.00514768				-0.349539	-0.220123	-1.12016	-6.98878	0.15078	-0.981994
PORS24	-0.069827	-0.00809352	0.0741115	0.0238794	0.0476118	0.00459097	0.0246715				-0.884092	-10.1569	-0.677791	0.993846	-0.903575	4.37392
PORS25	-0.45893	-0.282055	-0.0826354	-0.00517656	0.0718121	-0.296969	0.0968828				-0.385407	-0.707024	-0.937357	-14.8726	-5.13536	-1.32624
PORS26	0.117528	0.19976	0.295707	0.226267	0.243484	0.165405	0.227735				0.699677	0.480316	-0.234828	0.0760928	-0.320674	0.376829
PORS27	0.0939755	0.136173	0.285557	0.264285	0.289505	0.184264	0.260089				0.449025	1.09702	-0.0744947	0.0954305	-0.363521	0.411503
PORS28	0.148317	0.201329	0.326402	0.308103	0.312925	0.213742	0.295677				0.357421	0.621238	-0.056063	0.0156527	-0.316955	0.383335
PORS29	0.121298	0.133628	0.147503	0.211923	0.147157	0.101765	0.176787				0.101651	0.103833	0.436733	-0.305609	-0.308458	0.737199
PORS30	0.122122	0.212979	0.38495	0.33259	0.366365	0.267055	0.366106				0.743986	0.807451	-0.136016	0.101551	-0.271068	0.370897
PORS31	-0.225879	-0.0920365	0.0969581	-0.00944707	0.0513651	-0.0965482	0.00412892				-0.592541	-2.05348	-1.09743	-6.43715	-2.87965	-1.04277
PORS32	-0.0724706	-0.0640063	0.125096	0.0703176	0.0997978	0.0204366	0.0790353				-0.116796	-2.95444	-0.437893	0.419244	-0.79522	2.86735
PORS33	0.00675182	0.0580737	0.299109	0.231408	0.286083	0.161549	0.263864				7.60119	4.1505	-0.226342	0.23627	-0.435307	0.633338
PORS34	-0.315214	-0.233677	0.0589831	-0.0819604	-0.012759	-0.179909	-0.0397222				-0.25867	-1.25241	-2.38956	-0.844327	13.1005	-0.779209
PORS35											#DIV/0!	#DIV/0!	#DIV/0!	#DIV/0!	#DIV/0!	#DIV/0!
ROMS1	-0.119251	0.0576443	0.236858	0.315901	0.166746	0.138498	0.149934				-1.48339	3.10896	0.333716	-0.472157	-0.169407	0.082565
ROMS2	-0.515044	-0.381365	-0.286556	-0.181325	-0.279727	-0.228006	-0.2716				-0.259549	-0.248603	-0.367226	0.542681	-0.184898	0.191193
ROMS3	0.206417	0.325874	0.465417	0.526145	0.417914	0.344306	0.414502				0.578717	0.428208	0.130482	-0.205707	-0.176131	0.203875
ROMS4	-0.344443	-0.253626	-0.234338	-0.020614	-0.15915	-0.127969	-0.173971				-0.263663	-0.0760501	-0.912033	6.7205	-0.195922	0.359476
ROMS5	-0.173757	-0.127701	-0.0811205	-0.0539533	-0.0798253	-0.0960557	-0.0966211				-0.265057	-0.364763	-0.334899	0.479525	0.203324	0.00588589
ROMS6	-0.335111	-0.173983	-0.0922302	0.0315104	-0.106664	-0.0982633	-0.158721				-0.48082	-0.469888	-1.34165	-4.38506	-0.0787618	0.615263
ROMS7	-0.376783	-0.277552	-0.140156	0.00479298	-0.197431	-0.120278	-0.176315				-0.263364	-0.495026	-1.0342	-42.1918	-0.390784	0.465891
ROMS8	-0.83639	-0.732799	-0.723044	-0.621604	-0.768073	-0.652249	-0.679058				-0.123855	-0.0133116	-0.140296	0.235631	-0.150798	0.0411033
ROMS9	-0.561505	-0.41744	-0.323492	-0.1758	-0.319019	-0.257495	-0.302551				-0.25657	-0.225057	-0.456556	0.814673	-0.192854	0.174979
ROMS10	-0.364021	-0.158981	-0.0758117	-0.0512614	-0.122008	-0.0889925	-0.0556509				-0.563264	-0.52314	-0.323833	1.38011	-0.270598	-0.374656
ROMS11	-0.521648	-0.409055	-0.328815	-0.169913	-0.321425	-0.258991	-0.301209				-0.215841	-0.19616	-0.483257	0.891705	-0.19424	0.163008
ROMS12	-0.424409	-0.180903	-0.154725	-0.0808436	-0.25644	-0.429661	-0.258906				-0.573753	-0.144708	-0.477501	2.17205	0.675483	-0.397418
ROMS13	-0.420326	-0.28289	-0.213517	-0.0924553	-0.282916	-0.237706	-0.267042				-0.326975	-0.245231	-0.566988	2.06003	-0.159798	0.123413
ROMS14	-0.392637	-0.366778	-0.17448	-0.181812	-0.215341	-0.388248	-0.248865				-0.0658592	-0.524289	0.0420217	0.184416	0.802942	-0.359006
ROMS15	-0.478797	-0.309136	-0.0596193	-0.182267	-0.275626	-0.465284	-0.334928				-0.354349	-0.807142	2.05718	0.512207	0.6881	-0.280164
ROMS16	-0.209374	-0.193044	-0.115389	-0.0163882	-0.121543	-0.103425	-0.148255				-0.0779922	-0.402268	-0.857974	6.41652	-0.149072	0.433453
ROMS17	-0.857998	-0.755632	-0.588838	-0.294488	-0.625388	-0.418988	-0.466491				-0.119308	-0.220735	-0.499883	1.12364	-0.330035	0.113377
ROMS18	-0.447753	-0.179078	0.152442	0.322989	-0.0271161	0.0412605	0.173922				-0.600051	-1.85126	1.11876	-1.08395	-2.52163	3.21522
ROMS19	-0.371948	-0.292773	-0.116637	0.0411983	-0.206908	-0.0976116	-0.154769				-0.212867	-0.601612	-1.35322	-6.02225	-0.528237	0.585555
ROMS20	-0.250238	-0.0550254	0.201252	0.336639	0.0729187	0.206889	0.163729				-0.780107	-4.65744	0.672721	-0.783392	1.83726	-0.208616
ROMS21	-0.299715	-0.0846133	0.162145	0.350214	0.109569	0.136972	0.158175				-0.717687	-2.91631	1.15988	-0.687137	0.250095	0.154796
ROMS22	-0.190707	-0.0435877	0.100695	0.161932	0.0606575	0.0664491	0.0571625				-0.771441	-3.31017	0.608138	-0.625413	0.0954806	-0.139755
ROMS23	-0.272034	-0.0469761	0.0590181	0.254177	0.0136615	0.0275009	0.112848				-0.827315	-2.25634	3.30676	-0.946252	1.01301	3.10344
ROMS24	-0.305613	-0.128804	-0.113181	-0.0796634	-0.129317	-0.118349	-0.132394				-0.578538	-0.121296	-0.296141	0.623287	-0.0848143	0.118677
ROMS25	-0.305753	-0.237899	-0.145881	-0.07968	-0.142941	-0.126755	-0.144302				-0.221922	-0.386797	-0.4538	0.793936	-0.113236	0.138435
ROMS26	-0.436529	-0.295939	-0.0592074	0.118459	-0.194471	-0.0418791	-0.101228				-0.322064	-0.799934	-3.00075	-2.64168	-0.784652	1.41714
ROMS27	-0.391454	-0.297111	-0.116497	0.0725172	-0.206537	-0.102132	-0.156489				-0.241005	-0.607901	-1.62248	-3.84812	-0.505502	0.532218
ROMS28	-0.422846	-0.29561	-0.121086	0.0579882	-0.205859	-0.117098	-0.173366				-0.300903	-0.590386	-1.4789	-4.55002	-0.431175	0.480515
ROMS29	-0.340807	-0.213424	-0.013814	0.207033	-0.0530403	-0.00553312	-0.080283				-0.373769	-0.935275	-15.9872	-1.25619	-0.895681	13.5095
ROMS30	-0.575448	-0.391897	-0.112022	0.176826	-0.294105	-0.0831859	-0.121014				-0.318969	-0.714154	-2.57849	-2.66324	-0.717156	0.454741
ROMS31	-0.334358	-0.190569	0.00192155	0.105754	-0.0899794	-0.126789	-0.0725872				-0.430044	-1.01008	54.0356	-1.85084	0.409088	-0.427496
ROMS32	-0.25635	-0.163021	-0.0717598	-0.0381704	-0.116763	-0.160321	-0.135146				-0.364069	-0.559812	-0.468082	2.059	0.373046	-0.157031
ROMS33	-0.243623	-0.119226	0.0636264	0.294062	0.0686211	0.131042	0.0555706				-0.510614	-1.53366	3.6217	-0.766644	0.909653	-0.575934
ROMS34	-0.433797	-0.264557	0.0170272	0.200828	-0.168998	0.010106	-0.0518635				-0.390136	-1.06436	10.7946	-1.8415	-1.0598	-6.13194
ROMS35											#DIV/0!	#DIV/0!	#DIV/0!	#DIV/0!	#DIV/0!	#DIV/0!
RUSS1	0.239791	0.470273	0.423508	0.421165	0.476496	0.55809	0.331256				0.961182	-0.0994431	-0.00553148	0.131375	0.171238	-0.406446
RUSS2	0.774669	0.630253	0.56114	0.597838	0.66123	0.731218	0.502876				-0.186423	-0.109659	0.0653994	0.106036	0.105845	-0.312276
RUSS3	0.476785	0.685501	0.641975	0.67447	0.666444	0.736237	0.59454				0.437758	-0.063495	0.0506176	-0.0119004	0.104724	-0.19246
RUSS4	-0.229404	-0.298931	-0.350894	-0.403676	-0.366525	-0.426481	-0.403592				0.303079	0.173827	0.150422	-0.0920297	0.163578	-0.0536688
RUSS5	-0.0286381	-0.056521	-0.0611553	-0.0482532	-0.0238537	-0.0110657	-0.0646422				0.973626	0.0819934	-0.210973	-0.505655	-0.536101	4.84167
RUSS6	0.00775892	0.230139	0.227446	0.243597	0.33791	0.37225	0.127394				28.6612	-0.0116997	0.0710078	0.387168	0.101624	-0.657772
RUSS7	0.0203417	0.241784	0.224607	0.233752	0.307314	0.380038	0.146639				10.8861	-0.0710399	0.0407155	0.314698	0.236645	-0.614146
RUSS8	0.78181	0.707775	0.677234	0.665549	0.666547	0.727232	0.469822				-0.0946963	-0.043151	-0.0172546	0.00150017	0.0910437	-0.353958
RUSS9	0.613519	0.440385	0.38417	0.445374	0.515878	0.599752	0.348201				-0.282198	-0.12765	0.159315	0.158303	0.162586	-0.419424
RUSS10	0.387484	0.222497	0.203857	0.267197	0.343639	0.452598	0.190624				-0.42579	-0.0837755	0.310704	0.28609	0.317074	-0.578823
RUSS11	0.451129	0.305185	0.29013	0.341575	0.382593	0.463965	0.258452				-0.323508	-0.0493326	0.177317	0.120086	0.212686	-0.442949
RUSS12	0.705298	0.607335	0.601898	0.623869	0.672099	0.738456	0.538168				-0.138895	-0.00895282	0.0365032	0.0773078	0.0987308	-0.271225
RUSS13	0.591895	0.433993	0.427806	0.473512	0.483333	0.569254	0.391843				-0.266774	-0.0142548	0.106837	0.0207394	0.177769	-0.311655
RUSS14	0.591227	0.481042	0.457382	0.501135	0.512159	0.589453	0.410716				-0.186367	-0.0491834	0.0956575	0.0219987	0.150919	-0.303225
RUSS15	0.191846	0.0231555	-0.0263354	0.089451	0.098077	0.2492	-0.41832				-0.879302	-2.13733	-4.39661	0.0964333	1.54086	-2.67865
RUSS16	0.354313	0.181091	0.158842	0.22083	0.301645	0.386587	0.180961				-0.488894	-0.122861	0.390248	0.365959	0.281597	-0.5319
RUSS17	0.790401	0.64168	0.618277	0.630185	0.668952	0.737266	0.521212				-0.188158	-0.0364727	0.0192608	0.0615175	0.10212	-0.293048
RUSS18	0.764125	0.682935	0.653864	0.678392	0.683176	0.74533	0.587657				-0.106253	-0.0425671	0.0375113	0.00705195	0.0909779	-0.211548
RUSS19	0.372614	0.293683	0.257748	0.316813	0.353116	0.382038	0.186333				-0.21183	-0.12236	0.22916	0.114587	0.0819048	-0.512266
RUSS20	0.743199	0.595685	0.522424	0.580674	0.623786	0.682439	0.469646				-0.198485	-0.122986	0.111499	0.0742458	0.0940262	-0.311812
RUSS21	0.572555	0.509716	0.419622	0.481695	0.48403	0.57487	0.303817				-0.109751	-0.176753	0.147925	0.00484769	0.187675	-0.471504
RUSS22	0.367397	0.308773	0.267899	0.281573	0.336002	0.402307	0.17984				-0.159566	-0.132375	0.0510417	0.193304	0.197336	-0.552978
RUSS23	0.69082	0.511499	0.344012	0.383839	0.366407	0.516847	0.154815				-0.259576	-0.327445	0.115775	-0.0454172	0.410582	-0.700462
RUSS24	0.104336	0.0248759	-0.0380131	-0.00421373	0.0479861	0.116574	-0.025951				-0.761578	-2.52811	-0.889151	-12.388	1.42932	-1.22262
RUSS25	0.485395	0.380059	0.292973	0.225998	0.29966	0.328333	0.114291				-0.217011	-0.229138	-0.228604	0.32594	0.0956841	-0.651904
RUSS26	0.600903	0.53044	0.431074	0.462549	0.51046	0.603516	0.367154				-0.117261	-0.187328	0.0730164	0.10358	0.182299	-0.391642
RUSS27	0.514321	0.278466	0.254884	0.30187	0.308569	0.373168	0.16362				-0.458577	-0.0846855	0.184345	0.0221917	0.209351	-0.561537
RUSS28	0.535729	0.411431	0.374243	0.423443	0.459392	0.491676	0.319136				-0.232015	-0.0903875	0.131465	0.0848957	0.0702761	-0.350923
RUSS29	0.731516	0.56763	0.521851	0.564008	0.58772	0.643348	0.432768				-0.224037	-0.0806493	0.0807835	0.0420425	0.0946508	-0.32732
RUSS30	0.63743	0.50461	0.479186	0.54189	0.56312	0.631184	0.42433				-0.208369	-0.0503822	0.130856	0.0391767	0.12087	-0.327724
RUSS31	0.731606	0.562092	0.474765	0.520571	0.496518	0.571838	0.414737				-0.231702	-0.155361	0.0964825	-0.0462041	0.151696	-0.274731
RUSS32	0.627927	0.38246	0.39617	0.432517	0.426032	0.492498	0.263413				-0.390917	0.0358455	0.0917473	-0.0149939	0.156012	-0.46515
RUSS33	0.597536	0.449001	0.400613	0.477477	0.479376	0.535311	0.312674				-0.248579	-0.107769	0.191867	0.00397645	0.116683	-0.415903
RUSS34	0.620839	0.332298	0.394203	0.470071	0.503003	0.57725	0.27642				-0.464761	0.186296	0.192459	0.0700555	0.147608	-0.521142
RUSS35											#DIV/0!	#DIV/0!	#DIV/0!	#DIV/0!	#DIV/0!	#DIV/0!
SVKS1	-0.308675	-0.0506832	-0.0307671	-0.00248964	-0.511545	-0.352638	-0.0775928				-0.835804	-0.392953	-0.919081	204.47	-0.310641	-0.779965
SVKS2	-0.155067	-0.316141	-0.252034	-0.310658	-0.235973	-0.239939	-0.230223				1.03874	-0.202782	0.232607	-0.240408	0.0168048	-0.0404928
SVKS3	-0.00617748	0.256165	0.223365	0.236059	-0.175319	0.0961502	0.159446				-42.4675	-0.128043	0.0568307	-1.74269	-1.54843	0.6583
SVKS4	-0.378134	-0.17067	-0.230262	-0.0954314	-0.115213	-0.278734	-0.294399				-0.548653	0.349167	-0.585553	0.207287	1.41929	0.0561994
SVKS5	-0.184234	-0.192582	-0.2098	-0.204924	-0.0975763	-0.123315	-0.174146				0.0453164	0.089403	-0.0232382	-0.523842	0.263775	0.412213
SVKS6	-0.161966	0.0440486	0.0473819	0.0223799	-0.365899	-0.237068	-0.0253807				-1.27196	0.0756716	-0.527669	-17.3494	-0.352095	-0.892939
SVKS7	-0.285615	-0.326312	-0.346671	-0.33481	-0.31804	-0.412029	-0.415001				0.142488	0.0623906	-0.0342136	-0.0500866	0.295524	0.0072132
SVKS8	-0.751722	-0.804771	-0.818708	-0.818281	-0.727232	-0.826768	-0.766434				0.0705695	0.0173184	-0.000522159	-0.111269	0.13687	-0.0729759
SVKS9	-0.637193	-0.475442	-0.465878	-0.461679	-0.417577	-0.500724	-0.542032				-0.25385	-0.0201164	-0.00901126	-0.0955263	0.199118	0.0824959
SVKS10	-0.644664	-0.493387	-0.471868	-0.450903	-0.560397	-0.498122	-0.493619				-0.23466	-0.0436145	-0.0444296	0.242833	-0.111128	-0.00903836
SVKS11	-0.330587	-0.331399	-0.365709	-0.351254	-0.578861	-0.53132	-0.428495				0.00245669	0.10353	-0.0395258	0.647984	-0.082129	-0.193528
SVKS12	-0.778675	-0.688411	-0.751083	-0.762647	-0.818561	-0.792334	-0.703266				-0.11592	0.091038	0.0153976	0.0733156	-0.0320403	-0.112413
SVKS13	-0.626001	-0.477107	-0.49551	-0.526014	-0.60996	-0.593599	-0.542005				-0.237849	0.0385724	0.0615598	0.159589	-0.0268228	-0.0869178
SVKS14	-0.82311	-0.701483	-0.699703	-0.809283	-0.768835	-0.817134	-0.742762				-0.147766	-0.00253655	0.156609	-0.0499799	0.0628199	-0.0910148
SVKS15	-0.896317	-0.862373	-0.864649	-0.89832	-0.771938	-0.796392	-0.833751				-0.0378704	0.00263949	0.0389415	-0.140686	0.0316783	0.0469102
SVKS16	-0.122585	0.0847699	0.0708883	-0.0401143	-0.429188	-0.1988	-0.120919				-1.69152	-0.163756	-1.56588	9.69912	-0.536798	-0.391755
SVKS17	-0.798931	-0.811711	-0.819859	-0.847077	-0.85372	-0.877535	-0.829861				0.0159964	0.0100377	0.0331991	0.00784259	0.0278955	-0.0543279
SVKS18	-0.360717	-0.0965063	0.0823834	0.10494	-0.0935949	-0.0360576	-0.00189149				-0.73246	-1.85366	0.273797	-1.89189	-0.614749	-0.947542
SVKS19	-0.421585	-0.071642	-0.201892	-0.458823	-0.420005	-0.362279	-0.434627				-0.830065	1.81807	1.27261	-0.0846035	-0.137443	0.199705
SVKS20	-0.146583	0.245959	0.165491	0.167345	0.0991968	0.0496863	0.0675833				-2.67795	-0.327158	0.0112035	-0.407233	-0.499114	0.360202
SVKS21	0.0834629	0.228499	0.156191	0.183349	0.0863772	0.05117	0.0668847				1.73774	-0.316448	0.173872	-0.528891	-0.407598	0.307107
SVKS22	-0.191013	-0.04174	-0.0536091	-0.0527027	-0.0946175	-0.115445	-0.119809				-0.781481	0.284357	-0.0169078	0.795308	0.220118	0.0378045
SVKS23	-0.289231	-0.307146	-0.35042	-0.232741	-0.194506	-0.296605	-0.313291				0.0619394	0.140892	-0.335822	-0.164284	0.524918	0.0562553
SVKS24	-0.119422	-0.111194	-0.109633	-0.103986	-0.105106	-0.122137	-0.126869				-0.0688917	-0.0140384	-0.0515116	0.0107716	0.162039	0.0387354
SVKS25	-0.169981	-0.192072	-0.179	-0.103094	-0.122792	-0.183875	-0.186186				0.129961	-0.0680565	-0.424055	0.191067	0.49745	0.0125668
SVKS26	-0.184814	-0.164519	-0.18845	-0.100004	-0.0233685	-0.140943	-0.153277				-0.109812	0.145456	-0.469334	-0.766324	5.03132	0.0875126
SVKS27	-0.0303361	0.00650264	-0.0274861	-0.0119073	-0.0597488	-0.0868238	-0.099829				-1.21435	-5.22691	-0.566788	4.01783	0.453147	0.149789
SVKS28	0.0241848	0.146472	0.104652	0.144676	0.09721	0.0530945	0.03466				5.05637	-0.285521	0.382452	-0.328083	-0.453817	-0.3472
SVKS29	-0.0687565	0.103984	0.0635727	-0.0410455	0.195806	0.0346555	0.0306772				-2.51236	-0.388632	-1.64565	-5.77046	-0.823011	-0.114798
SVKS30	0.0804973	0.237795	0.174616	0.198782	0.131961	0.0969717	0.0867847				1.95408	-0.265687	0.138396	-0.336155	-0.265147	-0.105051
SVKS31	-0.0490824	0.0473199	-0.0184223	-0.00356769	-0.0148644	-0.139443	-0.156004				-1.96409	-1.38931	-0.806338	3.16639	8.38097	0.11877
SVKS32	-0.524285	-0.43587	-0.486605	-0.490665	-0.463031	-0.468722	-0.517151				-0.168639	0.116399	0.00834234	-0.056319	0.0122919	0.10332
SVKS33	-0.030313	0.0741423	0.019577	-0.106533	0.0467353	-0.00439571	-0.00408334				-3.44589	-0.735954	-6.44176	-1.43869	-1.09406	-0.0710624
SVKS34	-0.0418415	0.0579171	0.000104299	-0.128184	0.0121778	-0.148351	-0.142472				-2.3842	-0.998199	-1230	-1.095	-13.1821	-0.03963
SVKS35											#DIV/0!	#DIV/0!	#DIV/0!	#DIV/0!	#DIV/0!	#DIV/0!
SVNS1	-0.256587	-0.419366	-0.478629	-0.521032	-0.549544	-0.666977	-0.783581				0.634401	0.141316	0.0885939	0.054721	0.213693	0.174825
SVNS2	-0.181981	-0.211084	-0.201498	-0.177306	-0.208064	-0.317744	-0.549804				0.159926	-0.0454149	-0.120061	0.173473	0.527148	0.730334
SVNS3	-0.178032	0.0446717	-0.0407325	-0.0759654	-0.131372	-0.283186	-0.425307				-1.25092	-1.91182	0.86498	0.729363	1.15561	0.501866
SVNS4	-0.196587	-0.352641	-0.356722	-0.394036	-0.365157	-0.405695	-0.518225				0.793815	0.011572	0.104601	-0.0732887	0.111014	0.277376
SVNS5	-0.395762	-0.415987	-0.42404	-0.383161	-0.367452	-0.429004	-0.564961				0.0511049	0.0193572	-0.0964023	-0.0409987	0.167511	0.316911
SVNS6	-0.421661	-0.405202	-0.445208	-0.371069	-0.399504	-0.465884	-0.66368				-0.0390354	0.0987315	-0.166527	0.0766315	0.166156	0.42456
SVNS7	-0.399664	-0.456227	-0.500662	-0.487389	-0.5075	-0.651049	-0.719281				0.141528	0.0973954	-0.0265102	0.0412627	0.282855	0.104803
SVNS8	-0.0377801	-0.0647256	-0.0456264	-0.0537425	-0.0460548	-0.0450064	-0.0510826				0.71322	-0.29508	0.177882	-0.143047	-0.0227657	0.135007
SVNS9	-0.511578	-0.764622	-0.839386	-0.83755	-0.850065	-0.887239	-0.834035				0.494632	0.0977803	-0.00218807	0.0149429	0.0437299	-0.0599653
SVNS10	-0.524512	-0.647283	-0.737259	-0.736348	-0.75403	-0.79163	-0.858571				0.234066	0.139006	-0.00123629	0.0240131	0.049865	0.0845615
SVNS11	-0.229451	-0.251002	-0.310016	-0.299324	-0.382734	-0.514849	-0.674906				0.0939242	0.235117	-0.0344891	0.27866	0.345187	0.310881
SVNS12	-0.745076	-0.730522	-0.769475	-0.758618	-0.802276	-0.855373	-0.848807				-0.0195337	0.0533214	-0.0141087	0.0575487	0.066183	-0.00767571
SVNS13	-0.571192	-0.552561	-0.651577	-0.642677	-0.704193	-0.73212	-0.684872				-0.0326175	0.179196	-0.0136598	0.0957178	0.0396591	-0.0645369
SVNS14	-0.675071	-0.684645	-0.716083	-0.690737	-0.77296	-0.750146	-0.836109				0.0141815	0.0459183	-0.0353954	0.119037	-0.0295151	0.114595
SVNS15	-0.706938	-0.727075	-0.752827	-0.706971	-0.719839	-0.718248	-0.720779				0.0284854	0.0354182	-0.0609118	0.018201	-0.00220987	0.00352383
SVNS16	-0.268542	-0.370168	-0.416345	-0.271788	-0.352872	-0.392351	-0.559671				0.378439	0.124745	-0.347206	0.298336	0.111879	0.426454
SVNS17	-0.446784	-0.343974	-0.593442	-0.640674	-0.611086	-0.582223	-0.452073				-0.230113	0.725254	0.0795898	-0.0461816	-0.0472322	-0.22354
SVNS18	-0.298683	-0.348199	-0.428807	-0.426861	-0.472528	-0.622798	-0.666468				0.165781	0.231502	-0.00453965	0.106984	0.318014	0.0701181
SVNS19	-0.282582	-0.177307	-0.221799	-0.231437	-0.264682	-0.303221	-0.353276				-0.372546	0.250931	0.0434556	0.143647	0.145605	0.165076
SVNS20	-0.267827	-0.0528845	-0.14012	-0.173033	-0.251674	-0.40941	-0.459327				-0.802542	1.64955	0.234887	0.454488	0.626746	0.121924
SVNS21	-0.246647	0.0475332	-0.0121825	-0.0220947	-0.0994127	-0.26776	-0.344627				-1.19272	-1.25629	0.813647	3.49939	1.69342	0.287075
SVNS22	-0.251118	-0.0641604	-0.144574	-0.196458	-0.233856	-0.302701	-0.373893				-0.744501	1.25332	0.358873	0.190361	0.294391	0.235187
SVNS23	-0.287836	-0.397852	-0.430941	-0.196995	-0.227032	-0.610196	-0.572484				0.38222	0.0831693	-0.542872	0.152476	1.68771	-0.061804
SVNS24	-0.129488	-0.153975	-0.126798	-0.12269	-0.133121	-0.177414	-0.184879				0.189105	-0.176501	-0.0324032	0.0850179	0.332735	0.0420721
SVNS25	-0.178254	-0.205257	-0.205158	-0.116552	-0.112628	-0.11615	-0.139353				0.151484	-0.000481856	-0.431893	-0.0336601	0.0312664	0.199767
SVNS26	-0.109025	-0.147974	-0.171894	0.0652745	0.0352678	-0.345578	-0.286649				0.357253	0.161647	-1.37974	-0.4597	-10.7987	-0.170523
SVNS27	-0.325106	-0.15351	-0.20689	-0.220174	-0.26759	-0.352752	-0.397837				-0.527817	0.347736	0.0642085	0.215355	0.318254	0.127809
SVNS28	-0.324525	-0.138091	-0.192276	-0.204477	-0.259989	-0.350341	-0.406051				-0.574481	0.392383	0.0634544	0.271482	0.347525	0.159015
SVNS29	-0.254468	-0.288469	-0.346832	-0.349504	-0.381429	-0.4664	-0.517493				0.133618	0.20232	0.00770216	0.091344	0.22277	0.109549
SVNS30	-0.411068	-0.0675526	-0.101195	-0.149238	-0.254592	-0.420794	-0.482651				-0.835666	0.498015	0.474759	0.705944	0.652821	0.147001
SVNS31	-0.24988	-0.245833	-0.312416	-0.313498	-0.358773	-0.493153	-0.540544				-0.0161929	0.270844	0.00346554	0.144416	0.374557	0.0960961
SVNS32	-0.313144	-0.169031	-0.216965	-0.231782	-0.269697	-0.310324	-0.36988				-0.460215	0.283587	0.0682913	0.16358	0.150639	0.191914
SVNS33	-0.310381	-0.418568	-0.570448	-0.603164	-0.635878	-0.786995	-0.618068				0.34856	0.362856	0.0573513	0.0542384	0.23765	-0.214648
SVNS34	-0.332438	-0.100374	-0.173646	-0.200232	-0.238428	-0.342287	-0.40868				-0.698066	0.729979	0.153107	0.19076	0.435598	0.193967
SVNS35											#DIV/0!	#DIV/0!	#DIV/0!	#DIV/0!	#DIV/0!	#DIV/0!
SWES1	0.00785428	0.223134	0.34623	0.333968	0.0570038	0.0448933	-0.000258189				27.4093	0.551668	-0.0354165	-0.829314	-0.212451	-1.00575
SWES2	-0.375752	-0.0530533	-0.00262375	0.0588252	-0.216052	-0.205661	-0.190857				-0.858808	-0.950545	-23.4203	-4.67277	-0.0480929	-0.0719853
SWES3	0.110609	0.343108	0.475967	0.471037	0.233446	0.211659	0.203744				2.10199	0.38722	-0.0103574	-0.504399	-0.0933296	-0.037393
SWES4	-0.0813984	-0.0682881	-0.0410762	-0.0333351	-0.0882217	-0.0957854	-0.0956338				-0.161063	-0.398486	-0.188458	1.64651	0.0857345	-0.00158258
SWES5	-0.0677	-0.0500861	-0.0472577	-0.04849	-0.0549042	-0.0589313	-0.0616435				-0.260176	-0.0564695	0.0260754	0.132278	0.0733487	0.0460222
SWES6	0.193745	0.332324	0.422394	0.398312	0.219163	0.24002	0.174354				0.715267	0.271029	-0.0570119	-0.449771	0.0951666	-0.273584
SWES7	0.143154	0.406203	0.574293	0.576875	0.186481	0.141016	0.0658759				1.83752	0.413809	0.00449504	-0.67674	-0.243804	-0.532847
SWES8	-0.685633	-0.540901	-0.430784	-0.358214	-0.645447	-0.673071	-0.524682				-0.211092	-0.203582	-0.16846	0.801847	0.0427985	-0.220466
SWES9	0.0262163	0.300183	0.488526	0.513759	0.0943705	0.0554002	-0.030331				10.4503	0.627427	0.0516511	-0.816313	-0.412951	-1.54749
SWES10	-0.0237371	0.0759455	0.194597	0.169306	-0.0835466	-0.0939637	-0.12295				-4.19944	1.56232	-0.129966	-1.49347	0.124686	0.308486
SWES11	-0.0702687	0.0211238	0.134502	0.133128	-0.230719	-0.123364	-0.138998				-1.30061	5.3673	-0.0102119	-2.73306	-0.465307	0.126727
SWES12	-0.176813	0.0555703	0.32974	0.342662	-0.370368	-0.164609	-0.273573				-1.31429	4.93374	0.0391881	-2.08086	-0.555552	0.661952
SWES13	-0.116077	-0.167233	-0.0535645	0.136603	-0.132732	-0.0569045	-0.00855332				0.440701	-0.6797	-3.55025	-1.97167	-0.571284	-0.84969
SWES14	-0.556138	-0.428746	-0.496936	0.0303638	-0.0873949	-0.092599	-0.123494				-0.229065	0.159043	-1.0611	-3.87826	0.059547	0.333646
SWES15	-0.373484	-0.239823	0.0437673	-0.0341835	-0.495635	-0.357293	-0.419884				-0.357877	-1.1825	-1.78103	13.4992	-0.27912	0.17518
SWES16	-0.0413498	-0.088967	0.0634612	0.0518574	-0.0943663	-0.195826	-0.123916				1.15157	-1.71331	-0.182848	-2.81973	1.07517	-0.367215
SWES17	0.0539261	0.238739	0.393703	0.389997	0.0330742	0.0431688	-0.0352375				3.42716	0.64909	-0.00941122	-0.915194	0.30521	-1.81627
SWES18	0.355536	0.576327	0.70751	0.702277	0.377485	0.331956	0.304027				0.621011	0.227619	-0.00739705	-0.462484	-0.12061	-0.0841343
SWES19	-0.0868743	0.128103	0.317895	0.294104	-0.0961334	-0.0879056	-0.143525				-2.47457	1.48156	-0.0748395	-1.32687	-0.0855872	0.632716
SWES20	0.146495	0.465472	0.618486	0.604827	0.181082	0.123726	0.0953803				2.1774	0.328728	-0.022085	-0.700605	-0.316741	-0.2291
SWES21	0.185391	0.442016	0.573145	0.56014	0.234359	0.201708	0.18393				1.38424	0.296662	-0.0226912	-0.581607	-0.139319	-0.0881389
SWES22	0.226275	0.422865	0.542612	0.500393	0.19565	0.144447	0.142981				0.86881	0.283181	-0.0778061	-0.609007	-0.261709	-0.0101453
SWES23	0.0249616	0.241824	0.410065	0.420579	0.128846	0.0974631	0.0581358				8.68782	0.695719	0.025639	-0.693646	-0.243568	-0.40351
SWES24	-0.215929	0.0918751	0.229078	0.189013	-0.0193402	-0.0802975	-0.0501986				-1.42549	1.49336	-0.174896	-1.10232	3.15185	-0.374842
SWES25	-0.0583533	0.0402901	0.140285	0.0498083	-0.0801363	-0.111269	-0.10792				-1.69045	2.48187	-0.644949	-2.60889	0.388491	-0.0300959
SWES26	-0.11564	0.332821	0.451745	0.468377	0.157555	0.064589	0.11577				-3.87809	0.357319	0.0368173	-0.663615	-0.590055	0.792415
SWES27	-0.0962331	0.344308	0.505051	0.392517	-0.0118505	-0.0712774	-0.102667				-4.57785	0.466861	-0.222818	-1.03019	5.01472	0.440383
SWES28	-0.0261664	0.190234	0.384969	0.40669	-0.0669298	-0.0725986	-0.110871				-8.27016	1.02366	0.0564236	-1.16457	0.0846977	0.527178
SWES29	0.441679	0.633625	0.730622	0.722285	0.455382	0.422197	0.401292				0.434581	0.153084	-0.0114117	-0.369525	-0.0728724	-0.049515
SWES30	0.170129	0.520609	0.650005	0.664851	0.301971	0.246738	0.199321				2.06008	0.248548	0.0228395	-0.545806	-0.182907	-0.192176
SWES31	0.288796	0.423318	0.561681	0.554523	0.184809	0.169775	0.143334				0.465802	0.326855	-0.0127445	-0.666725	-0.0813467	-0.155744
SWES32	0.283888	0.434355	0.567605	0.586158	0.21641	0.224082	0.207193				0.530021	0.306775	0.0326864	-0.6308	0.0354504	-0.0753676
SWES33	0.420745	0.449645	0.586414	0.592001	0.154737	0.178788	0.139774				0.0686875	0.30417	0.00952843	-0.73862	0.155429	-0.218214
SWES34	-0.505581	0.206598	0.382085	0.247245	0.0788941	-0.219033	0.0856138				-1.40864	0.849411	-0.352906	-0.680907	-3.77629	-1.39087
SWES35											#DIV/0!	#DIV/0!	#DIV/0!	#DIV/0!	#DIV/0!	#DIV/0!
TURS1	0.0219348	0.0975517	0.174131	0.0805277	-0.0512889	-0.151934	-0.120267				3.44736	0.785011	-0.537545	-1.63691	1.96232	-0.208428
TURS2	0.0632814	0.146433	0.149197	0.118627	0.188818	-0.0108242	0.0724605				1.31399	0.0188758	-0.204892	0.59169	-1.05733	-7.69429
TURS3	0.329402	0.418526	0.476441	0.394015	0.165166	-0.0831241	0.0318478				0.270562	0.13838	-0.173004	-0.580814	-1.50328	-1.38314
TURS4	-0.0770153	0.16348	0.252094	-0.241144	-0.304924	-0.270706	-0.208464				-3.12269	0.542049	-1.95657	0.264489	-0.112218	-0.229925
TURS5	-0.364306	-0.0506389	0.00458588	-0.0609106	-0.0737066	-0.116723	-0.10579				-0.860999	-1.09056	-14.2822	0.210077	0.583614	-0.0936654
TURS6	-0.0624727	-0.0256169	0.0209947	-0.0241741	-0.0598403	-0.124242	-0.119007				-0.58995	-1.81956	-2.15144	1.47539	1.07622	-0.042132
TURS7	0.0990773	0.208113	0.223408	0.254752	0.224187	0.0497345	0.0788913				1.10051	0.0734914	0.140299	-0.11998	-0.778156	0.586249
TURS8	0.117868	0.293084	0.430734	0.183715	0.267315	0.149965	0.0546913				1.48655	0.469658	-0.573483	0.45505	-0.438996	-0.635306
TURS9	-0.251783	-0.310297	-0.183475	-0.352624	-0.241114	-0.224099	-0.149076				0.2324	-0.408712	0.921917	-0.316228	-0.07057	-0.334777
TURS10	0.167307	0.140354	0.238879	0.0399972	0.0564058	0.0800676	0.17117				-0.161104	0.701977	-0.832563	0.410243	0.419492	1.13782
TURS11	0.0853362	0.194696	0.27307	0.211316	0.187415	0.0114972	0.0149878				1.28152	0.402547	-0.226147	-0.113107	-0.938654	0.303607
TURS12	-0.275897	0.131586	0.257557	-0.434357	-0.243088	-0.221871	0.055408				-1.47694	0.957329	-2.68645	-0.44035	-0.0872806	-1.24973
TURS13	-0.221138	-0.0188831	0.286457	-0.119825	-0.11594	-0.113286	0.1133				-0.91461	-16.1701	-1.4183	-0.0324225	-0.0228914	-2.00012
TURS14	-0.214575	0.0234733	0.186823	-0.242839	0.0725035	0.0243088	-0.213604				-1.10939	6.95899	-2.29983	-1.29857	-0.664722	-9.78709
TURS15	-0.153019	0.203869	0.302522	-0.284609	-0.113643	-0.115743	0.0537871				-2.33231	0.483905	-1.94079	-0.600704	0.0184749	-1.46471
TURS16	-0.178755	0.0118904	0.272564	-0.224487	-0.199393	-0.199027	-0.0690384				-1.06652	21.9231	-1.82361	-0.111781	-0.0018397	-0.65312
TURS17	0.033474	0.166371	0.351575	0.255977	0.218914	0.0275176	-0.00612263				3.97017	1.11319	-0.271912	-0.144794	-0.874299	-1.2225
TURS18	0.390473	0.519459	0.644293	-0.110387	-0.00472194	-0.00574347	0.359463				0.330332	0.240315	-1.17133	-0.957224	0.216337	-63.5864
TURS19	0.237733	0.31391	0.208533	0.24353	0.318515	0.178894	0.260223				0.320433	-0.335693	0.167824	0.307909	-0.438348	0.454618
TURS20	0.340819	0.420388	0.484232	0.43486	0.409675	0.220215	0.255911				0.233463	0.151871	-0.101961	-0.0579138	-0.462466	0.162098
TURS21	0.265278	0.461494	0.437038	0.351589	0.370789	0.240632	0.301903				0.739661	-0.0529934	-0.195517	0.054609	-0.351028	0.254626
TURS22	0.129677	0.256526	0.333483	0.123603	-0.0057188	-0.175017	-0.0498379				0.978184	0.299999	-0.629357	-1.04627	29.6038	-0.715239
TURS23	0.00773453	0.232443	0.363693	0.0724226	0.191101	0.00204756	-0.0463415				29.0526	0.564658	-0.800869	1.63869	-0.989285	-23.6325
TURS24	-0.104345	0.0455306	0.177637	0.0159472	0.036581	-0.0822572	-0.0739811				-1.43635	2.9015	-0.910226	1.29388	-3.24863	-0.100612
TURS25	0.114223	0.263199	0.330589	0.167215	0.174773	0.0668025	0.10147				1.30426	0.256039	-0.494191	0.0451988	-0.617775	0.51895
TURS26	-0.0683488	0.206401	0.337422	0.0963934	0.154393	0.0184525	0.0574162				-4.01981	0.634793	-0.714324	0.601694	-0.880484	2.11157
TURS27	0.301503	0.320421	0.246176	0.254845	0.294659	0.105018	0.157287				0.0627464	-0.231709	0.0352131	0.156226	-0.643593	0.49771
TURS28	0.118481	0.233219	0.368223	0.131227	0.196706	0.265995	0.288745				0.968401	0.578872	-0.64362	0.498969	0.35225	0.0855282
TURS29	0.0894615	0.17599	0.55423	-0.120038	-0.0905842	-0.0902442	0.0703242				0.96721	2.14922	-1.21659	-0.245372	-0.00375381	-1.77927
TURS30	0.266207	0.284633	0.277246	0.270077	0.297231	0.112099	0.165905				0.0692162	-0.0259539	-0.0258552	0.100541	-0.622855	0.479985
TURS31	0.117253	0.333333	0.335639	0.373782	0.195592	0.155261	0.305798				1.84286	0.0069189	0.113644	-0.476722	-0.206199	0.96957
TURS32	0.174799	0.225591	0.206318	0.21986	0.208861	0.071779	0.113834				0.290574	-0.0854337	0.0656365	-0.05003	-0.656331	0.585894
TURS33	0.0875815	0.234411	0.271758	0.271243	0.277196	0.130126	0.152529				1.67649	0.159324	-0.00189515	0.0219461	-0.530564	0.172166
TURS34	0.263724	0.302277	0.314011	0.358145	0.345078	0.200203	0.238801				0.146188	0.0388183	0.140549	-0.0364843	-0.419833	0.192796
TURS35											#DIV/0!	#DIV/0!	#DIV/0!	#DIV/0!	#DIV/0!	#DIV/0!
TAPS1	-0.0833491	-0.198764	-0.20569	-0.106446	-0.107007	-0.121729	-0.113672				1.38471	0.0348485	-0.482492	0.00526976	0.137576	-0.0661902
TAPS2	-0.125316	-0.0862174	-0.0968693	-0.0959576	-0.0923123	-0.107503	-0.120928				-0.312	0.123548	-0.00941256	-0.0379885	0.164558	0.124882
TAPS3	0.0217531	-0.178657	-0.19916	0.0680634	0.0555256	0.0264498	0.038137				-9.21297	0.114763	-1.34175	-0.184207	-0.523646	0.441863
TAPS4	-0.491702	-0.407823	-0.408989	-0.339944	-0.312005	-0.217756	-0.279459				-0.170589	0.00285834	-0.168819	-0.0821871	-0.302074	0.283358
TAPS5	-0.158115	-0.162776	-0.174282	-0.120068	-0.105335	-0.118969	-0.130092				0.0294827	0.0706834	-0.311071	-0.122705	0.129435	0.0934964
TAPS6	-0.124255	-0.106291	-0.116554	-0.132323	-0.119878	-0.13051	-0.137964				-0.144578	0.0965611	0.13529	-0.0940509	0.0886909	0.0571181
TAPS7	-0.216798	-0.0735514	-0.213971	-0.266221	-0.257323	-0.26215	-0.272622				-0.660738	1.90914	0.244194	-0.0334258	0.0187608	0.0399447
TAPS8	-0.74667	-0.67215	-0.777373	-0.679319	-0.745465	-0.713382	-0.813294				-0.0998036	0.156547	-0.126135	0.0973713	-0.0430376	0.140054
TAPS9	-0.634424	-0.50971	-0.588484	-0.528663	-0.477906	-0.428135	-0.599898				-0.196579	0.154547	-0.101653	-0.0960096	-0.104144	0.401188
TAPS10	-0.525364	-0.413665	-0.482633	-0.421488	-0.390531	-0.365747	-0.474358				-0.212613	0.166726	-0.126692	-0.073445	-0.063464	0.296958
TAPS11	-0.425526	-0.378871	-0.483856	-0.392669	-0.387108	-0.367692	-0.480745				-0.109639	0.277098	-0.188459	-0.0141629	-0.050156	0.307466
TAPS12	-0.682568	-0.548966	-0.558155	-0.481171	-0.423384	-0.398288	-0.493377				-0.195734	0.0167378	-0.137926	-0.120097	-0.059274	0.238745
TAPS13	-0.510587	-0.355778	-0.383165	-0.429046	-0.41814	-0.446696	-0.403271				-0.303198	0.0769796	0.119742	-0.0254206	0.0682925	-0.0972135
TAPS14	-0.857518	-0.663592	-0.861977	-0.900272	-0.897548	-0.898428	-0.875508				-0.226148	0.298957	0.044426	-0.00302495	0.000980042	-0.0255112
TAPS15	-0.470686	-0.421876	-0.379301	-0.31999	-0.292273	-0.238469	-0.274888				-0.1037	-0.100917	-0.15637	-0.0866189	-0.184087	0.152722
TAPS16	-0.308753	-0.272562	-0.280319	-0.267192	-0.237106	-0.229776	-0.264004				-0.117216	0.0284591	-0.0468304	-0.112599	-0.0309153	0.148962
TAPS17	-0.743018	-0.648413	-0.789555	-0.652892	-0.701621	-0.667798	-0.731283				-0.127326	0.217673	-0.173088	0.0746349	-0.0482073	0.0950672
TAPS18	-0.467652	-0.296448	-0.310052	-0.168123	-0.143174	-0.107415	-0.0788896				-0.366094	0.0458903	-0.457758	-0.148398	-0.249758	-0.265564
TAPS19	-0.278796	-0.244175	-0.229783	-0.207316	-0.178526	-0.173143	-0.203377				-0.12418	-0.0589423	-0.0977744	-0.13887	-0.0301539	0.174621
TAPS20	-0.247473	-0.0408628	-0.291451	-0.370771	-0.359852	-0.379439	-0.39688				-0.83488	6.13243	0.272152	-0.0294485	0.0544319	0.0459636
TAPS21	-0.351889	-0.0843205	-0.213536	-0.123316	-0.113141	-0.143149	-0.144536				-0.760378	1.53244	-0.422507	-0.0825074	0.26522	0.00969199
TAPS22	-0.197151	-0.00709388	-0.195454	0.0258359	-0.0131335	0.0381494	-0.121809				-0.964018	26.5525	-1.13218	-1.50834	-3.90473	-4.19294
TAPS23	-0.525765	-0.450634	-0.527277	-0.441638	-0.495409	-0.499686	-0.552551				-0.142898	0.170078	-0.162417	0.121753	0.00863449	0.105795
TAPS24	-0.342142	-0.222871	-0.250877	-0.15671	-0.267263	-0.295769	-0.363735				-0.348602	0.125661	-0.37535	0.705461	0.106659	0.229792
TAPS25	-0.527274	-0.449254	-0.515558	-0.357453	-0.461364	-0.49278	-0.588808				-0.14797	0.147587	-0.306668	0.2907	0.0680927	0.194871
TAPS26	-0.160646	-0.161425	-0.207743	-0.209345	-0.195893	-0.22346	-0.270065				0.00485083	0.286928	0.00771426	-0.0642589	0.140727	0.20856
TAPS27	-0.198164	-0.170641	-0.191557	-0.223271	-0.215019	-0.212399	-0.301468				-0.138892	0.122575	0.165562	-0.036963	-0.0121852	0.419351
TAPS28	-0.321226	-0.177977	-0.34492	-0.401517	-0.403467	-0.415739	-0.41888				-0.445943	0.937999	0.164087	0.0048568	0.0304169	0.00755325
TAPS29	-0.238424	-0.123438	-0.126065	-0.00485886	0.00287259	0.0189375	0.0499693				-0.482274	0.0212814	-0.961458	-1.59121	5.59248	1.63864
TAPS30	-0.565505	-0.353474	-0.550339	-0.625934	-0.639814	-0.650831	-0.630594				-0.37494	0.556944	0.13736	0.0221758	0.0172184	-0.0310935
TAPS31	-0.198168	-0.0833944	-0.265619	-0.327097	-0.337084	-0.360082	-0.349927				-0.579172	2.1851	0.231452	0.0305323	0.0682251	-0.0282014
TAPS32	-0.398162	-0.293267	-0.38261	-0.308272	-0.306752	-0.301223	-0.342145				-0.263449	0.304649	-0.194292	-0.00493021	-0.0180259	0.135855
TAPS33	-0.327927	-0.163812	-0.0834757	-0.129979	-0.1483	-0.153607	-0.10856				-0.500462	-0.490417	0.55709	0.140951	0.0357882	-0.293264
TAPS34	-0.331966	-0.124878	-0.200552	-0.222011	-0.226857	-0.231555	-0.265306				-0.623823	0.605983	0.107	0.0218285	0.0207119	0.145758
TAPS35											#DIV/0!	#DIV/0!	#DIV/0!	#DIV/0!	#DIV/0!	#DIV/0!
USAS1	0.65977	0.689622	0.715713	0.756904	0.693958	0.579777	0.640186				0.0452451	0.0378345	0.057553	-0.0831631	-0.164536	0.104193
USAS2	0.711445	0.761628	0.780882	0.745702	0.690661	0.617272	0.670528				0.0705368	0.0252805	-0.0450512	-0.0738111	-0.106259	0.0862763
USAS3	0.781063	0.808887	0.813376	0.825127	0.785748	0.703677	0.759071				0.0356224	0.0055506	0.0144463	-0.0477246	-0.10445	0.0787203
USAS4	0.444088	0.464585	0.460261	0.417824	0.360623	0.234279	0.287689				0.0461561	-0.00930726	-0.0922017	-0.136902	-0.350351	0.227979
USAS5	0.11678	0.151648	0.0947779	0.128618	0.0702354	0.0263546	0.045373				0.298573	-0.375012	0.357042	-0.453921	-0.624768	0.721637
USAS6	0.470292	0.511379	0.48672	0.533221	0.485715	0.364618	0.418808				0.087364	-0.0482195	0.0955384	-0.0890927	-0.249317	0.148621
USAS7	0.701467	0.725232	0.743046	0.758411	0.691826	0.566103	0.645373				0.0338795	0.0245626	0.0206793	-0.0877962	-0.181726	0.140027
USAS8	0.582014	0.694279	0.69779	0.662688	0.600355	0.468402	0.578638				0.192891	0.0050559	-0.0503042	-0.0940612	-0.219791	0.235344
USAS9	0.729929	0.769232	0.763898	0.750584	0.698832	0.585303	0.662139				0.053844	-0.00693332	-0.0174291	-0.068949	-0.162455	0.131275
USAS10	0.646056	0.683963	0.672499	0.678652	0.630299	0.508476	0.583718				0.0586752	-0.0167615	0.00915025	-0.071249	-0.193278	0.147976
USAS11	0.483762	0.569542	0.510875	0.497825	0.429159	0.326854	0.380404				0.177319	-0.103007	-0.0255457	-0.137931	-0.238386	0.163835
USAS12	0.687324	0.741818	0.737936	0.756168	0.709971	0.592821	0.672065				0.0792845	-0.00523234	0.0247067	-0.0610942	-0.165006	0.133672
USAS13	0.648455	0.70926	0.689239	0.718982	0.659714	0.545399	0.629381				0.0937684	-0.0282275	0.0431538	-0.082434	-0.17328	0.153983
USAS14	0.616036	0.668927	0.642047	0.694495	0.647802	0.536903	0.622712				0.0858559	-0.0401827	0.0816882	-0.0672339	-0.171192	0.159822
USAS15	0.784971	0.811972	0.803216	0.793459	0.742195	0.647639	0.724439				0.0343963	-0.0107832	-0.0121469	-0.0646082	-0.127401	0.118584
USAS16	0.5911	0.623912	0.629228	0.633052	0.553385	0.421868	0.507995				0.0555105	0.00852043	0.00607721	-0.125846	-0.237659	0.204156
USAS17	0.639445	0.656936	0.703525	0.659501	0.591533	0.4851	0.56024				0.0273525	0.0709192	-0.0625764	-0.10306	-0.179928	0.154897
USAS18	0.784898	0.818097	0.827402	0.864362	0.815275	0.708615	0.782941				0.0422973	0.0113738	0.0446696	-0.0567903	-0.130827	0.104889
USAS19	0.455796	0.710307	0.509664	0.658731	0.65798	0.541422	0.624581				0.558387	-0.282473	0.292481	-0.00113999	-0.177145	0.153593
USAS20	0.80656	0.830839	0.846928	0.845309	0.823365	0.744977	0.798339				0.0301021	0.0193641	-0.0019115	-0.0259599	-0.0952043	0.0716295
USAS21	0.784007	0.822061	0.829533	0.849369	0.806158	0.724632	0.78266				0.0485389	0.00908852	0.0239128	-0.0508738	-0.101129	0.0800784
USAS22	0.777061	0.815324	0.828668	0.819139	0.792518	0.707949	0.774033				0.0492414	0.0163669	-0.0115003	-0.0324982	-0.106709	0.0933452
USAS23	0.62525	0.692862	0.710808	0.789599	0.737865	0.641268	0.713426				0.108136	0.0259016	0.110848	-0.0655201	-0.130914	0.112524
USAS24	0.40618	0.429029	0.444878	0.503162	0.38582	0.300417	0.368765				0.0562534	0.0369404	0.131011	-0.233209	-0.221354	0.227509
USAS25	0.495862	0.555307	0.589402	0.537168	0.52666	0.391342	0.54172				0.119883	0.0613974	-0.088622	-0.0195612	-0.256937	0.384263
USAS26	0.624788	0.651049	0.667828	0.713137	0.647272	0.525792	0.60347				0.0420319	0.0257722	0.0678462	-0.0923591	-0.18768	0.147735
USAS27	0.733972	0.755568	0.779459	0.797377	0.738787	0.623388	0.690724				0.0294231	0.0316207	0.0229871	-0.0734776	-0.156201	0.108016
USAS28	0.794067	0.832887	0.849504	0.86374	0.820164	0.731089	0.789054				0.0488878	0.0199506	0.0167579	-0.0504497	-0.108606	0.0792849
USAS29	0.840149	0.870759	0.878554	0.8989	0.865033	0.795228	0.83667				0.0364343	0.00895147	0.0231587	-0.0376762	-0.0806962	0.0521136
USAS30	0.813808	0.844634	0.861495	0.868392	0.83009	0.749685	0.805014				0.037879	0.0199624	0.0080061	-0.0441066	-0.0968634	0.0738029
USAS31	0.814099	0.707482	0.863052	0.88744	0.852872	0.769678	0.827906				-0.130963	0.219893	0.0282576	-0.0389524	-0.0975453	0.0756524
USAS32	0.658634	0.886212	0.688497	0.73422	0.645916	0.528896	0.606153				0.345529	-0.223101	0.0664104	-0.12027	-0.181168	0.146072
USAS33	0.833891	0.866307	0.871662	0.87323	0.833099	0.752264	0.807193				0.0388735	0.00618097	0.00179865	-0.0459562	-0.0970297	0.0730188
USAS34	0.759357	0.798454	0.809664	0.811595	0.765209	0.66641	0.734704				0.0514868	0.0140394	0.00238427	-0.0571539	-0.129114	0.102481
USAS35											#DIV/0!	#DIV/0!	#DIV/0!	#DIV/0!	#DIV/0!	#DIV/0!
BANS1	0.155985	-0.248799	-0.238205	0.323889	-0.371494	-0.611668	-0.764941				-2.59502	-0.0425816	-2.35971	-2.14698	0.646508	0.250583
BANS2	-0.0868528	-0.0876139	-0.208935	-0.00967458	-0.155839	-0.158298	-0.153943				0.00876373	1.38472	-0.953696	15.1081	0.0157802	-0.0275161
BANS3	0.347497	0.021263	0.0910883	0.416417	-0.120942	-0.348947	-0.586441				-0.938811	3.2839	3.57158	-1.29044	1.88523	0.680604
BANS4	-0.187044	-0.815133	-0.772255	0.0354676	-0.853651	-0.900021	-0.891801				3.35796	-0.0526018	-1.04593	-25.0685	0.0543201	-0.00913311
BANS5	-0.0983939	-0.376188	-0.338877	-0.0155284	-0.460657	-0.496425	-0.537346				2.82329	-0.0991828	-0.954177	28.6655	0.0776454	0.0824314
BANS6	0.00370357	-0.227066	-0.231456	0.134346	-0.237487	-0.300209	-0.318454				-62.31	0.0193312	-1.58044	-2.76773	0.264106	0.0607761
BANS7	-0.102427	-0.160629	-0.161864	-0.0277181	-0.138685	-0.163911	-0.182521				0.568231	0.00769352	-0.828757	4.00342	0.181894	0.113537
BANS8	-0.0591704	-0.077465	-0.0705229	-0.0907333	-0.385246	-0.416011	-0.437273				0.309186	-0.0896166	0.28658	3.24592	0.079858	0.0511084
BANS9	-0.1239	-0.201588	-0.199659	-0.0775123	-0.149171	-0.248971	-0.348855				0.627026	-0.00957232	-0.611776	0.924483	0.669028	0.401187
BANS10	-0.128088	-0.200528	-0.192261	-0.124641	-0.379988	-0.399418	-0.369631				0.565546	-0.0412272	-0.351709	2.04866	0.0511333	-0.0745771
BANS11	0.181055	0.197269	-0.0432888	0.392964	-0.104478	-0.145211	-0.128468				0.0895511	-1.21944	-10.0777	-1.26587	0.389872	-0.115301
BANS12	-0.118066	-0.14717	-0.595911	0.392707	-0.216002	-0.287961	-0.345113				0.246505	3.04913	-1.659	-1.55003	0.333144	0.198469
BANS13	-0.143768	-0.123478	-0.166113	-0.0694878	-0.0883212	-0.0882976	-0.212919				-0.141133	0.345288	-0.581685	0.271031	-0.00026645	1.41138
BANS14	-0.116328	-0.142464	-0.197922	-0.0495536	-0.0140515	-0.0831767	-0.14623				0.224673	0.38928	-0.749631	-0.716438	4.91942	0.758067
BANS15	-0.0354454	-0.108741	-0.440098	0.300335	-0.16517	-0.21693	-0.199515				2.06784	3.04722	-1.68243	-1.54995	0.313379	-0.0802783
BANS16	-0.117318	-0.341185	-0.287653	0.0333638	-0.343774	-0.356599	-0.32516				1.90822	-0.156901	-1.11599	-11.3038	0.037308	-0.0881632
BANS17	0.0185289	0.0348787	-0.297849	0.177023	-0.0549236	-0.103659	-0.113862				0.882396	-9.53958	-1.59434	-1.31026	0.887337	0.0984226
BANS18	0.339909	0.462738	-0.496767	0.705145	0.332201	0.123647	0.222535				0.36136	-2.07354	-2.41947	-0.52889	-0.627793	0.799755
BANS19	-0.0131133	-0.173347	-0.200692	0.114235	-0.11585	-0.122749	-0.119728				12.2192	0.157746	-1.56921	-2.01414	0.0595547	-0.0246168
BANS20	-0.441219	-0.57652	-0.169484	-0.11409	-0.138404	-0.18551	-0.269953				0.306653	-0.706022	-0.32684	0.213107	0.340358	0.45519
BANS21	0.0687578	0.0998609	-0.300131	0.384399	0.0433508	-0.134618	-0.282807				0.452358	-4.00549	-2.28077	-0.887224	-4.10531	1.10081
BANS22	0.220569	-0.099473	-0.0969013	0.342525	-0.114082	-0.365948	-0.589607				-1.45098	-0.0258532	-4.53478	-1.33306	2.20776	0.611175
BANS23	0.0688984	0.156942	-0.441297	0.495031	-0.135981	-0.244481	-0.203114				1.27788	-3.81185	-2.12176	-1.27469	0.797901	-0.1692
BANS24	-0.128198	-0.0812484	-0.370517	0.202548	-0.189956	-0.264071	-0.238911				-0.366227	3.5603	-1.54666	-1.93783	0.39017	-0.0952776
BANS25	-0.14686	-0.133683	-0.256282	0.0192371	-0.168398	-0.189022	-0.190442				-0.0897247	0.917086	-1.07506	-9.75382	0.122466	0.00751711
BANS26	-0.125205	-0.118195	-0.183834	-0.0477679	-0.14515	-0.162902	-0.152878				-0.0559827	0.555343	-0.740158	2.03866	0.122298	-0.0615304
BANS27	-0.0564024	-0.161368	-0.184785	0.0241886	-0.238484	-0.301954	-0.352536				1.86102	0.145114	-1.1309	-10.8593	0.26614	0.167515
BANS28	0.0756555	-0.0789849	-0.109833	0.197155	-0.203529	-0.315826	-0.42816				-2.04401	0.390558	-2.79504	-2.03233	0.551746	0.355685
BANS29	-0.105415	-0.0363528	-0.413871	0.338023	-0.146268	-0.256831	-0.208801				-0.655144	10.3848	-1.81674	-1.43272	0.755898	-0.187012
BANS30	-0.089608	-0.168041	-0.187119	0.0110788	-0.231366	-0.321863	-0.405942				0.87529	0.113531	-1.05921	-21.8836	0.391142	0.261226
BANS31	0.249197	-0.185919	-0.14394	0.450736	-0.139606	0.0618623	-0.065783				-1.74607	-0.225795	-4.13142	-1.30973	-1.44312	-2.06338
BANS32	-0.0867101	-0.0261452	-0.146859	0.147702	-0.199928	-0.227227	-0.223483				-0.698476	4.61706	-2.00574	-2.35359	0.136542	-0.0164763
BANS33	-0.251695	-0.714274	-0.566258	0.0371709	-0.590865	-0.468148	-0.545627				1.83786	-0.207226	-1.06564	-16.8959	-0.207691	0.165501
BANS34	-0.0135853	-0.235913	-0.261154	0.204061	-0.22682	-0.234704	-0.230208				16.3653	0.106994	-1.78138	-2.11153	0.034758	-0.0191521
BANS35											#DIV/0!	#DIV/0!	#DIV/0!	#DIV/0!	#DIV/0!	#DIV/0!
MALS1	0.00445747	-0.0503236	-0.0878957	0.0281014	-0.121113	-0.176202	-0.176705				-12.2897	0.746611	-1.31971	-5.30988	0.454852	0.00285247
MALS2	-0.248064	-0.19494	-0.271503	-0.315533	-0.350718	-0.293029	-0.284794				-0.214157	0.392751	0.162173	0.111509	-0.164489	-0.0281002
MALS3	0.333242	0.246417	0.194139	0.40846	0.326645	0.265825	0.209024				-0.260546	-0.212152	1.10396	-0.200302	-0.186194	-0.213679
MALS4	-0.191623	-0.179436	-0.186357	-0.175143	-0.237745	-0.37545	-0.447969				-0.0635964	0.0385719	-0.0601761	0.357433	0.579212	0.193153
MALS5	-0.115084	-0.107935	-0.114328	-0.110893	-0.132059	-0.125145	-0.190273				-0.0621222	0.0592263	-0.0300391	0.190861	-0.0523512	0.520422
MALS6	-0.0906042	-0.0993356	-0.12855	-0.082622	-0.200051	-0.258638	-0.278875				0.0963691	0.294096	-0.357276	1.42128	0.29286	0.0782425
MALS7	-0.407451	-0.452171	-0.480601	-0.271196	-0.470749	-0.498604	-0.507839				0.109756	0.0628749	-0.435716	0.735829	0.0591713	0.0185214
MALS8	0.153412	0.259286	0.200453	-0.176766	-0.15148	0.117653	0.0887623				0.690132	-0.226903	-1.88183	-0.14305	-1.77669	-0.245557
MALS9	-0.0397237	-0.0864519	-0.185593	-0.17422	-0.2116	-0.0512793	-0.104508				1.17633	1.14678	-0.0612803	0.214556	-0.757659	1.03801
MALS10	-0.0133733	-0.0465191	-0.128794	-0.255232	-0.56078	-0.643233	-0.161493				2.47851	1.76863	0.981702	1.19714	0.147033	-0.748936
MALS11	-0.420637	-0.463537	-0.520426	-0.272121	-0.350124	-0.29572	-0.283196				0.101986	0.122728	-0.477118	0.286649	-0.155385	-0.0423514
MALS12	-0.416045	-0.630116	-0.531504	-0.513476	-0.429876	-0.51339	-0.574811				0.51454	-0.156498	-0.0339193	-0.162811	0.194273	0.119639
MALS13	-0.323321	-0.458775	-0.393234	-0.382373	-0.50879	-0.569139	-0.533278				0.418947	-0.142861	-0.0276188	0.330612	0.118612	-0.0630086
MALS14	-0.817985	-0.879073	-0.886029	-0.777258	-0.842617	-0.8456	-0.820384				0.074681	0.00791367	-0.122763	0.0840888	0.00354052	-0.02982
MALS15	-0.492076	-0.498554	-0.436833	-0.18021	-0.403781	-0.443153	-0.447197				0.0131639	-0.123799	-0.587462	1.24061	0.0975088	0.0091258
MALS16	-0.0898531	-0.131173	-0.102444	-0.135574	-0.102593	-0.151923	-0.239539				0.459863	-0.219015	0.32339	-0.243266	0.480829	0.576712
MALS17	-0.0912807	-0.156361	-0.198778	-0.188835	-0.251262	-0.170402	-0.134617				0.712965	0.271282	-0.050023	0.330594	-0.321817	-0.210002
MALS18	-0.109054	-0.183204	-0.235354	0.0580278	-0.0456901	-0.142833	-0.159114				0.679946	0.284653	-1.24656	-1.78738	2.12612	0.113989
MALS19	-0.332225	-0.329141	-0.308012	-0.312848	-0.332822	-0.401562	-0.442105				-0.00928339	-0.0641946	0.0157007	0.0638444	0.206538	0.100962
MALS20	-0.463776	-0.497294	-0.50465	-0.41491	-0.501461	-0.568531	-0.560964				0.0722724	0.0147913	-0.177826	0.208601	0.133748	-0.0133093
MALS21	-0.467253	-0.507371	-0.517073	-0.408918	-0.476871	-0.54781	-0.55205				0.0858588	0.0191208	-0.209167	0.166177	0.148761	0.00774006
MALS22	0.10174	0.0399988	-0.00479986	0.251428	-0.0161144	0.0116168	0.0693201				-0.606852	-1.12	-53.3823	-1.06409	-1.7209	4.96725
MALS23	-0.236679	-0.163927	-0.207588	-0.330223	-0.363238	-0.252243	-0.231302				-0.307387	0.266349	0.590756	0.0999806	-0.305571	-0.0830206
MALS24	-0.32361	-0.318612	-0.261618	-0.0960765	-0.30827	-0.318206	-0.320101				-0.015443	-0.178883	-0.632761	2.20859	0.0322301	0.00595545
MALS25	-0.146608	-0.0649403	-0.100057	-0.106166	-0.274221	-0.242709	-0.23035				-0.557048	0.540747	0.0610591	1.58294	-0.114913	-0.0509228
MALS26	-0.253435	-0.189362	-0.231519	-0.33368	-0.370109	-0.274312	-0.262122				-0.252816	0.222622	0.441265	0.109175	-0.258834	-0.0444405
MALS27	-0.196074	-0.199182	-0.189317	-0.132909	-0.362044	-0.419236	-0.413911				0.015852	-0.0495256	-0.297957	1.724	0.157972	-0.012702
MALS28	-0.197913	-0.170347	-0.217855	-0.17258	-0.357759	-0.418156	-0.414564				-0.139282	0.278885	-0.20782	1.073	0.168821	-0.00859026
MALS29	-0.243779	-0.270701	-0.290971	-0.175769	-0.188591	-0.221164	-0.235518				0.110435	0.0748797	-0.395923	0.0729508	0.172718	0.0648985
MALS30	-0.319521	-0.305301	-0.28765	-0.339307	-0.494083	-0.557418	-0.552479				-0.0445064	-0.0578139	0.179584	0.456153	0.128187	-0.00885989
MALS31	0.00579802	-0.0629	-0.118783	0.0958974	-0.256512	-0.368079	-0.36047				-11.8485	0.888444	-1.80733	-3.67486	0.434937	-0.0206723
MALS32	0.091458	0.0376939	-0.0192452	-0.183954	-0.240718	-0.212994	-0.241886				-0.587856	-1.51056	8.55848	0.308574	-0.115172	0.135649
MALS33	-0.104095	-0.125839	-0.190874	-0.259107	-0.459009	-0.490028	-0.487911				0.208881	0.516814	0.357475	0.771505	0.0675774	-0.00431994
MALS34	-0.143044	-0.154763	-0.177737	-0.131916	-0.251593	-0.292511	-0.292998				0.0819289	0.148442	-0.257799	0.907214	0.162635	0.00166388
MALS35											#DIV/0!	#DIV/0!	#DIV/0!	#DIV/0!	#DIV/0!	#DIV/0!
PHIS1	0.0698	0.0760709	0.0998149	-0.197953	-0.184148	-0.238853	-0.132248				0.0898409	0.31213	-2.98321	-0.0697432	0.297072	-0.44632
PHIS2	-0.352492	-0.302382	-0.311061	-0.236544	-0.252314	-0.43326	-0.31238				-0.142161	0.0287032	-0.239558	0.0666688	0.717146	-0.279
PHIS3	0.469044	0.470366	0.479229	0.254206	0.197295	0.110217	0.226726				0.00281804	0.0188428	-0.469552	-0.223876	-0.441362	1.05709
PHIS4	-0.232981	-0.185879	-0.14785	-0.316387	-0.50043	-0.645684	-0.682641				-0.202171	-0.204592	1.13992	0.581701	0.290259	0.0572369
PHIS5	-0.0944185	-0.0935714	-0.0967771	-0.176941	-0.154125	-0.172433	-0.226271				-0.00897178	0.0342592	0.828333	-0.128947	0.118785	0.312229
PHIS6	-0.251171	-0.242995	-0.237846	-0.307733	-0.377592	-0.393266	-0.345597				-0.0325499	-0.0211888	0.293831	0.227013	0.0415096	-0.121211
PHIS7	-0.157411	-0.10612	-0.108046	-0.126839	-0.0951486	-0.217507	-0.176681				-0.325843	0.0181523	0.173935	-0.249848	1.28597	-0.187701
PHIS8	-0.844742	-0.712322	-0.795477	-0.624586	-0.672702	-0.682356	-0.751824				-0.156758	0.116738	-0.214829	0.0770361	0.014351	0.101807
PHIS9	-0.337225	-0.630848	-0.593616	-0.598841	-0.532819	-0.576454	-0.479439				0.870706	-0.0590197	0.00880294	-0.110251	0.0818952	-0.168295
PHIS10	-0.244878	-0.462962	-0.447042	-0.443457	-0.388703	-0.420781	-0.342636				0.89058	-0.0343872	-0.00801938	-0.123472	0.0825267	-0.185714
PHIS11	-0.578849	-0.493764	-0.502151	-0.238189	-0.47593	-0.502744	-0.543371				-0.146991	0.016986	-0.525663	0.998123	0.0563406	0.0808102
PHIS12	-0.581688	-0.550665	-0.64108	-0.615555	-0.602379	-0.741928	-0.808601				-0.0533323	0.164193	-0.0398159	-0.0214056	0.231664	0.0898647
PHIS13	-0.331385	-0.292996	-0.338228	-0.3275	-0.247017	-0.308853	-0.402853				-0.115846	0.154378	-0.0317179	-0.245749	0.250331	0.304351
PHIS14	-0.695694	-0.792183	-0.797192	-0.839593	-0.867723	-0.870062	-0.893325				0.138695	0.00632211	0.0531881	0.0335043	0.00269595	0.0267378
PHIS15	-0.408939	-0.452222	-0.418069	-0.402309	-0.335054	-0.268821	-0.204984				0.105841	-0.0755226	-0.0376975	-0.167172	-0.197679	-0.237469
PHIS16	-0.148819	-0.104095	-0.106058	-0.100339	-0.212709	-0.215905	-0.239997				-0.300529	0.0188637	-0.0539212	1.11989	0.0150252	0.111586
PHIS17	-0.652584	-0.537827	-0.58936	-0.2736	-0.350312	-0.360256	-0.45555				-0.17585	0.0958181	-0.535767	0.28038	0.0283849	0.264517
PHIS18	-0.15453	-0.448846	-0.607682	-0.628771	-0.835802	-0.811389	-0.775702				1.9046	0.353877	0.0347037	0.329262	-0.0292089	-0.0439828
PHIS19	-0.182832	-0.147358	-0.150764	-0.138856	-0.128668	-0.237292	-0.164477				-0.194026	0.0231182	-0.0789886	-0.0733695	0.844217	-0.306857
PHIS20	-0.145222	-0.223503	-0.131618	-0.195125	-0.238333	-0.403756	-0.362166				0.539044	-0.411111	0.482509	0.221433	0.694087	-0.103007
PHIS21	-0.0396724	0.0968569	0.0819021	0.165738	0.246912	-0.206737	0.146317				-3.44142	-0.154401	1.02362	0.489771	-1.83729	-1.70774
PHIS22	-0.081533	-0.0363994	-0.00876942	-0.318535	-0.338602	-0.357465	-0.248375				-0.553562	-0.759078	35.3234	0.0629965	0.0557094	-0.305175
PHIS23	-0.56161	-0.627482	-0.538976	-0.471837	-0.649927	-0.770759	-0.70385				0.117292	-0.14105	-0.124568	0.37744	0.185916	-0.0868082
PHIS24	-0.290751	-0.252425	-0.202414	-0.125343	-0.256608	-0.365045	-0.281377				-0.131816	-0.198123	-0.380761	1.04725	0.42258	-0.2292
PHIS25	-0.586041	-0.619891	-0.604692	-0.386809	-0.241353	-0.631879	-0.600574				0.0577595	-0.0245177	-0.360321	-0.37604	1.61807	-0.0495425
PHIS26	-0.144882	-0.178241	-0.0763833	-0.110233	-0.19536	-0.412714	-0.360299				0.230251	-0.571461	0.443157	0.772246	1.11258	-0.127001
PHIS27	-0.295715	-0.370839	-0.274527	-0.326401	-0.354742	-0.585313	-0.599515				0.254041	-0.259714	0.188958	0.0868278	0.64997	0.0242633
PHIS28	0.116435	0.219666	0.235096	0.259713	0.441914	0.367702	0.413255				0.886603	0.0702434	0.10471	0.701548	-0.167932	0.123883
PHIS29	-0.100043	-0.00913639	0.171121	0.152635	0.18768	0.137351	0.203619				-0.908676	-19.7296	-0.10803	0.229599	-0.268163	0.482475
PHIS30	0.118271	0.200528	0.226346	0.193529	0.223523	0.177058	0.243751				0.695499	0.128751	-0.144987	0.154988	-0.207878	0.376677
PHIS31	-0.00244352	0.112334	0.123348	0.13575	0.297319	0.217601	0.26252				-46.9722	0.0980477	0.100543	1.1902	-0.268123	0.206426
PHIS32	-0.0367867	-0.0913453	-0.0455381	-0.102979	-0.0806587	-0.137677	-0.10762				1.4831	-0.501473	1.26138	-0.216746	0.706906	-0.218312
PHIS33	-0.058869	-0.0880882	0.0241581	0.0408828	-0.0937991	-0.14239	-0.0831547				0.496344	-1.27425	0.692301	-3.29434	0.518029	-0.416007
PHIS34	-0.160005	-0.237923	-0.157846	-0.160285	-0.0673138	-0.277281	-0.121361				0.486973	-0.336565	0.0154485	-0.580037	3.11923	-0.562319
PHIS35											#DIV/0!	#DIV/0!	#DIV/0!	#DIV/0!	#DIV/0!	#DIV/0!
THAS1	-0.098726	0.00393198	-0.381621	-0.38473	-0.495296	-0.531943	-0.475631				-1.03983	-98.0555	0.00814747	0.287387	0.0739892	-0.105861
THAS2	0.00994116	0.0449168	-0.298604	-0.213169	-0.352461	-0.359049	-0.365545				3.51827	-7.64793	-0.286113	0.653431	0.0186906	0.0180943
THAS3	0.506943	0.442597	0.209475	0.234391	-0.0434276	-0.104982	0.0192606				-0.12693	-0.526712	0.118941	-1.18528	1.41741	-1.18347
THAS4	-0.166384	-0.202695	-0.223573	-0.247785	-0.228235	-0.283116	-0.398418				0.218238	0.102999	0.108298	-0.0789011	0.240458	0.407264
THAS5	-0.17485	-0.117835	-0.166464	-0.15042	-0.171225	-0.211766	-0.196372				-0.326077	0.412683	-0.0963794	0.138313	0.236768	-0.0726946
THAS6	-0.108458	-0.112134	-0.173289	-0.138582	-0.190135	-0.201757	-0.212365				0.0338969	0.545377	-0.200286	0.372005	0.0611279	0.0525758
THAS7	0.00861012	-0.0743014	-0.1627	-0.112581	-0.188185	-0.200544	-0.215297				-9.62954	1.18973	-0.308047	0.671563	0.0656736	0.0735654
THAS8	-0.799088	-0.765817	-0.861166	-0.733514	-0.83748	-0.88319	-0.896649				-0.0416361	0.124507	-0.148232	0.141737	0.0545804	0.0152391
THAS9	-0.371225	-0.379806	-0.497904	-0.284664	-0.439981	-0.531019	-0.558707				0.0231142	0.310945	-0.428276	0.545618	0.206912	0.0521428
THAS10	-0.100529	-0.154668	0.0275723	-0.0169019	-0.147734	-0.193497	-0.141072				0.538533	-1.17827	-1.613	7.74069	0.30976	-0.270935
THAS11	-0.831286	-0.734022	-0.862991	-0.810228	-0.800416	-0.817674	-0.83095				-0.117004	0.175702	-0.06114	-0.0121095	0.021561	0.0162358
THAS12	-0.783092	-0.787405	-0.869081	-0.891129	-0.923335	-0.927265	-0.897736				0.00550669	0.103728	0.02537	0.0361403	0.00425686	-0.031846
THAS13	-0.591389	-0.605493	-0.704036	-0.729599	-0.774148	-0.765844	-0.729545				0.0238492	0.162748	0.0363093	0.0610594	-0.0107274	-0.0473964
THAS14	-0.239802	-0.165163	-0.503572	-0.526685	-0.669967	-0.671351	-0.620087				-0.311252	2.04893	0.0458977	0.272046	0.00206598	-0.0763601
THAS15	-0.559744	-0.623464	-0.685694	-0.74093	-0.804673	-0.810418	-0.761594				0.113837	0.0998137	0.0805558	0.0860305	0.00713973	-0.0602453
THAS16	-0.0974911	-0.137399	-0.408746	-0.428471	-0.592915	-0.604788	-0.544332				0.409353	1.97487	0.0482559	0.383794	0.0200243	-0.0999616
THAS17	-0.441175	-0.543805	-0.673072	-0.522282	-0.620163	-0.693676	-0.72096				0.232629	0.237706	-0.224032	0.18741	0.118538	0.0393335
THAS18	-0.528126	-0.567772	-0.658646	-0.687906	-0.759347	-0.764174	-0.725679				0.0750679	0.160054	0.0444256	0.103853	0.00635602	-0.0503744
THAS19	-0.2415	-0.191718	-0.349949	-0.361834	-0.433543	-0.424207	-0.402401				-0.206136	0.825331	0.0339619	0.198183	-0.0215347	-0.0514035
THAS20	0.384999	0.267664	0.0643282	0.149173	-0.0305886	-0.0652913	-0.0746784				-0.304766	-0.759668	1.31893	-1.20505	1.1345	0.143774
THAS21	-0.0340134	-0.110205	-0.516194	-0.546675	-0.677608	-0.684083	-0.630365				2.24003	3.68396	0.0590504	0.239507	0.00955637	-0.0785253
THAS22	0.529297	0.36047	0.263342	0.249154	-0.0197752	0.0506605	0.0432102				-0.318965	-0.269449	-0.0538772	-1.07937	-3.56183	-0.147063
THAS23	-0.396063	-0.429177	-0.587861	-0.502888	-0.561136	-0.634706	-0.669783				0.0836073	0.369739	-0.144545	0.115826	0.13111	0.0552637
THAS24	-0.489526	-0.415059	-0.55419	-0.502083	-0.529178	-0.560644	-0.580952				-0.152121	0.335208	-0.0940238	0.0539653	0.0594628	0.0362219
THAS25	-0.484868	-0.366573	-0.593294	-0.412861	-0.378654	-0.463614	-0.487769				-0.243974	0.618488	-0.304122	-0.0828538	0.224376	0.0521018
THAS26	-0.0441024	-0.141507	-0.211524	-0.158364	-0.294771	-0.234516	-0.250369				2.20861	0.494795	-0.251321	0.861356	-0.204414	0.0675974
THAS27	0.043218	-0.0722718	-0.160539	-0.229545	-0.332312	-0.324511	-0.27009				-2.67226	1.22132	0.42984	0.447701	-0.0234755	-0.167701
THAS28	0.141902	-0.00197339	-0.121436	-0.21857	-0.355738	-0.354938	-0.278588				-1.01391	60.5366	0.799881	0.627572	-0.00225005	-0.215108
THAS29	0.101133	-0.026264	-0.121782	-0.196559	-0.299133	-0.295288	-0.23767				-1.2597	3.63684	0.614026	0.521849	-0.0128549	-0.195126
THAS30	0.268244	0.100534	-0.00810923	-0.281572	-0.484766	-0.479328	-0.370054				-0.625215	-1.08066	33.7224	0.721641	-0.0112166	-0.227974
THAS31	-0.44816	-0.389669	-0.633827	-0.710834	-0.780802	-0.783798	-0.749289				-0.130513	0.626577	0.121497	0.0984296	0.00383766	-0.0440282
THAS32	0.0646398	-0.0228654	-0.210251	-0.238472	-0.324675	-0.353744	-0.293745				-1.35374	8.19513	0.134227	0.361481	0.0895314	-0.16961
THAS33	-0.241554	-0.235106	-0.259096	-0.29845	-0.346161	-0.332821	-0.3549				-0.0266923	0.102036	0.151893	0.159861	-0.038537	0.0663383
THAS34	-0.00768022	-0.1027	-0.180939	-0.241349	-0.31956	-0.317145	-0.273179				12.3719	0.761824	0.333872	0.324057	-0.00755441	-0.138633
THAS35											#DIV/0!	#DIV/0!	#DIV/0!	#DIV/0!	#DIV/0!	#DIV/0!
VIES1	0.378632	0.200105	0.095629	0.0739089	0.0155244	0.113777	0.205773				-0.471506	-0.522106	-0.227129	-0.789953	6.32893	0.80856
VIES2	-0.400196	-0.380526	-0.394701	-0.290703	-0.359126	-0.487738	-0.367717				-0.0491493	0.0372496	-0.263484	0.235368	0.358124	-0.246076
VIES3	0.554958	0.417359	0.317392	0.272807	0.281789	0.366174	0.430341				-0.247945	-0.239522	-0.140473	0.0329248	0.299463	0.175236
VIES4	-0.796985	-0.819346	-0.809503	-0.750917	-0.829959	-0.810912	-0.777835				0.0280571	-0.0120129	-0.0723734	0.105261	-0.0229495	-0.0407896
VIES5	-0.348101	-0.368672	-0.348443	-0.396227	-0.555895	-0.520292	-0.429556				0.0590962	-0.0548719	0.137137	0.40297	-0.0640455	-0.174394
VIES6	-0.0638392	-0.220577	-0.288184	-0.316749	-0.303642	-0.240316	-0.195289				2.45519	0.306505	0.0991191	-0.041378	-0.208556	-0.187364
VIES7	-0.11244	-0.17188	-0.197221	-0.20098	-0.28217	-0.294367	-0.134753				0.528635	0.147433	0.0190608	0.403972	0.0432245	-0.542227
VIES8	-0.233821	-0.212238	-0.209103	-0.0547798	-0.237855	-0.316957	-0.166662				-0.0923066	-0.0147712	-0.738025	3.34201	0.332565	-0.474182
VIES9	-0.514344	-0.526554	-0.521621	-0.598951	-0.717767	-0.709878	-0.654855				0.0237392	-0.00936951	0.148251	0.198373	-0.0109917	-0.0775108
VIES10	-0.349534	-0.375257	-0.343061	-0.448439	-0.631323	-0.622746	-0.540579				0.0735924	-0.0857958	0.30717	0.407823	-0.0135861	-0.131943
VIES11	-0.0613139	-0.0147392	-0.0232901	-0.113056	-0.0891512	-0.238344	-0.0335825				-0.759612	0.580153	3.85425	-0.211443	1.67348	-0.859101
VIES12	-0.76399	-0.779087	-0.743943	-0.695109	-0.800252	-0.796345	-0.751272				0.0197606	-0.0451089	-0.0656429	0.151262	-0.00488287	-0.0565991
VIES13	-0.52517	-0.53144	-0.504968	-0.49556	-0.566127	-0.571717	-0.531049				0.0119393	-0.0498113	-0.0186314	0.142399	0.00987345	-0.0711331
VIES14	-0.817788	-0.868417	-0.861446	-0.911328	-0.936627	-0.920654	-0.901837				0.0619101	-0.00802726	0.0579053	0.0277605	-0.0170543	-0.0204388
VIES15	-0.536366	-0.543001	-0.45884	-0.512571	-0.618401	-0.57659	-0.516252				0.0123707	-0.154992	0.117101	0.206469	-0.0676106	-0.104647
VIES16	-0.355455	-0.361214	-0.273762	-0.354814	-0.450579	-0.465051	-0.362989				0.0162011	-0.242106	0.296068	0.2699	0.0321204	-0.219465
VIES17	-0.203966	-0.166543	-0.188957	-0.1544	-0.218385	-0.347553	-0.229815				-0.183476	0.134584	-0.182886	0.414414	0.591472	-0.338763
VIES18	-0.486781	-0.505824	-0.434544	-0.37423	-0.524913	-0.515063	-0.428374				0.0391211	-0.140919	-0.138798	0.402647	-0.0187661	-0.168308
VIES19	-0.322517	-0.305814	-0.271323	-0.28641	-0.336811	-0.361358	-0.304129				-0.0517889	-0.112787	0.0556062	0.175976	0.072881	-0.158372
VIES20	-0.0200022	-0.0687987	-0.00752021	0.323567	0.289837	0.192231	0.285433				2.43955	-0.890693	-44.0264	-0.104244	-0.336763	0.484848
VIES21	-0.358438	-0.366871	-0.363905	-0.431907	-0.528195	-0.488544	-0.44986				0.0235274	-0.00808554	0.186869	0.222936	-0.075068	-0.0791823
VIES22	-0.0759249	-0.231554	-0.309631	-0.352533	-0.378764	-0.30628	-0.232628				2.04977	0.337189	0.138557	0.0744068	-0.191371	-0.240471
VIES23	-0.464133	-0.414449	-0.484436	-0.443028	-0.532725	-0.613813	-0.504105				-0.107047	0.168867	-0.0854754	0.202462	0.152214	-0.178733
VIES24	-0.211941	-0.150902	-0.231651	-0.0625886	-0.193269	-0.323346	-0.1714				-0.287998	0.535105	-0.729815	2.08792	0.673036	-0.469917
VIES25	-0.0872629	-0.0789576	-0.0978706	-0.176427	-0.255906	-0.343499	-0.245392				-0.0951759	0.239533	0.802655	0.450493	0.342285	-0.285611
VIES26	-0.193877	-0.17592	-0.113718	-0.148013	-0.206493	-0.230587	-0.211563				-0.0926192	-0.353583	0.301584	0.395098	0.116681	-0.0825007
VIES27	-0.345724	-0.35155	-0.343736	-0.420327	-0.537962	-0.511188	-0.45767				0.0168515	-0.0222273	0.222818	0.279866	-0.0497691	-0.104694
VIES28	-0.194438	-0.191441	-0.180112	-0.00435628	-0.0531628	-0.020099	-0.0235638				-0.0154138	-0.059179	-0.975813	11.2037	-0.621935	0.172386
VIES29	-0.304414	-0.321987	-0.292213	-0.18799	-0.166465	-0.202342	-0.137723				0.0577267	-0.0924689	-0.356669	-0.1145	0.215524	-0.319355
VIES30	-0.0807066	-0.0213838	-0.0508307	-0.0641485	-0.135712	-0.0499574	-0.0534625				-0.735042	1.37706	0.262003	1.11559	-0.631887	0.070161
VIES31	-0.165536	-0.21198	-0.250281	-0.237226	-0.191299	-0.229171	-0.215245				0.280568	0.180684	-0.0521633	-0.1936	0.197971	-0.0607659
VIES32	-0.193814	-0.197076	-0.18075	-0.0222418	-0.119124	-0.137974	-0.138266				0.0168298	-0.0828419	-0.876947	4.35585	0.158238	0.00211798
VIES33	-0.333759	-0.345204	-0.365346	-0.45401	-0.665057	-0.622652	-0.542919				0.0342933	0.0583477	0.242683	0.464853	-0.0637626	-0.128054
VIES34	-0.120467	-0.102108	-0.0840013	-0.105676	-0.161491	-0.16681	-0.0804949				-0.1524	-0.17733	0.258022	0.528182	0.0329321	-0.517445
VIES35	-0.0271522	-0.0241407	-0.0193466	-0.0320406	-0.040683	-0.0376659	-0.0367082				-0.110911	-0.19859	0.656131	0.269735	-0.0741614	-0.0254273
KAZS1	0.0843976	0.152745	0.283351	0.300973	0.162941	0.30313	-0.137469				0.809832	0.855054	0.0621905	-0.458618	0.860362	-1.4535
KAZS2	0.317722	0.465023	0.250308	0.0369081	-0.0173293	-0.012442	0.288474				0.463615	-0.461729	-0.852549	-1.46953	-0.282024	-24.1854
KAZS3	0.180742	0.217295	0.334341	0.372298	0.273524	0.415989	0.0863508				0.20224	0.538646	0.113528	-0.265309	0.52085	-0.79242
KAZS4	-0.262127	-0.231465	-0.184713	-0.190286	-0.209847	-0.167564	-0.281612				-0.116974	-0.201981	0.0301702	0.1028	-0.201495	0.680621
KAZS5	-0.127437	-0.126477	-0.113203	-0.123532	-0.137501	-0.1417	-0.165086				-0.00752764	-0.104952	0.0912457	0.113077	0.030537	0.165037
KAZS6	-0.184498	-0.177788	-0.148787	-0.156785	-0.172132	-0.15855	-0.182313				-0.0363707	-0.163119	0.0537547	0.097883	-0.0789048	0.149882
KAZS7	-0.236386	-0.186198	-0.165505	-0.205679	-0.194296	-0.209849	-0.249669				-0.212312	-0.111139	0.242736	-0.0553404	0.080047	0.189757
KAZS8	-0.00775601	0.074345	-0.183993	-0.276277	-0.296196	-0.299963	-0.213237				-10.5855	-3.47486	0.50156	0.0720996	0.0127178	-0.289121
KAZS9	-0.206285	-0.169983	-0.25543	-0.312642	-0.33137	-0.300913	-0.128804				-0.17598	0.502678	0.223984	0.0599013	-0.0919114	-0.571956
KAZS10	-0.242418	-0.242627	-0.164064	-0.180051	-0.194308	-0.146795	-0.321534				0.000862064	-0.323801	0.097442	0.0791851	-0.244526	1.19037
KAZS11	-0.198154	-0.183875	-0.0735193	-0.224686	-0.270308	-0.256402	-0.256523				-0.0720616	-0.600167	2.05615	0.203046	-0.0514428	0.000471838
KAZS12	0.357343	0.447901	0.320183	0.275227	0.1998	0.170297	0.408572				0.253419	-0.285148	-0.140405	-0.274054	-0.147664	1.39918
KAZS13	-0.187694	-0.157487	-0.232768	-0.270877	-0.298744	-0.273093	-0.164678				-0.160938	0.478016	0.163722	0.102878	-0.0858643	-0.396988
KAZS14	-0.260194	-0.260841	-0.284087	-0.313488	-0.318445	-0.30635	-0.239141				0.00248557	0.0891174	0.103495	0.0158131	-0.0379821	-0.219388
KAZS15	-0.255465	-0.244618	-0.423697	-0.295031	-0.302299	-0.284135	-0.0595726				-0.0424593	0.732078	-0.303674	0.0246356	-0.0600862	-0.790337
KAZS16	-0.236169	-0.232025	-0.194895	-0.206358	-0.221879	-0.201059	-0.275946				-0.0175461	-0.160027	0.0588181	0.0752105	-0.0938338	0.372463
KAZS17	0.0275103	0.0166026	-0.050755	-0.200732	-0.27468	-0.269107	-0.089216				-0.396494	-4.05705	2.95492	0.368397	-0.0202917	-0.668474
KAZS18	0.323427	0.38951	0.181603	0.14967	0.0409455	0.0112069	0.271809				0.204321	-0.533766	-0.175838	-0.726429	-0.726297	23.2537
KAZS19	-0.26227	-0.251806	-0.197797	-0.152579	-0.217574	-0.223279	-0.368929				-0.0398997	-0.214486	-0.228607	0.425978	0.0262195	0.652323
KAZS20	0.168261	0.232766	0.387976	0.331857	0.174703	0.342884	-0.099604				0.383364	0.666805	-0.144647	-0.473559	0.962668	-1.29049
KAZS21	0.011521	0.141195	0.0985886	0.0544057	0.100861	0.019662	-0.362969				11.2555	-0.301757	-0.448155	0.853874	-0.805059	-19.4604
KAZS22	-0.199014	-0.157552	-0.032208	-0.101473	-0.0623701	0.0769775	-0.216134				-0.208337	-0.795572	2.15055	-0.385351	-2.23421	-3.80775
KAZS23	-0.155701	0.0257976	0.0175684	-0.0728819	-0.374994	-0.334471	-0.235755				-1.16569	-0.318991	-5.14846	4.14523	-0.108063	-0.295143
KAZS24	-0.223028	-0.208315	-0.188364	-0.196596	-0.202194	-0.201119	-0.226599				-0.0659709	-0.0957724	0.0437034	0.028473	-0.00531707	0.126694
KAZS25	-0.212489	-0.155695	-0.0656955	-0.192422	-0.156608	-0.107872	-0.255784				-0.26728	-0.57805	1.92901	-0.186124	-0.311201	1.37119
KAZS26	-0.2442	-0.207615	-0.136668	-0.234376	-0.178855	0.0469966	-0.252984				-0.149817	-0.341722	0.714921	-0.236889	-1.26276	-6.38304
KAZS27	-0.210354	-0.22643	-0.186866	-0.230114	-0.143812	-0.179931	-0.396288				0.0764252	-0.174731	0.231438	-0.375041	0.251159	1.20244
KAZS28	-0.132202	-0.107044	-0.126457	-0.0641049	-0.244554	-0.0130896	-0.0742119				-0.190306	0.181362	-0.493071	2.81491	-0.946476	4.66955
KAZS29	-0.183303	0.0330207	-0.0418492	-0.0443594	-0.145595	-0.114085	0.0921315				-1.18014	-2.26736	0.0599821	2.28217	-0.216425	-1.80757
KAZS30	-0.0375265	0.0570788	0.0366098	-0.0257127	-0.0803776	-0.0617489	-0.476233				-2.52103	-0.358609	-1.70234	2.12599	-0.231765	6.71241
KAZS31	0.0130736	0.153796	0.208434	0.206175	0.0813465	0.0643421	-0.352676				10.7639	0.355263	-0.0108354	-0.60545	-0.209037	-6.48127
KAZS32	0.0277595	0.0121539	-0.0896283	-0.0879305	-0.120072	-0.165522	-0.014505				-0.562172	-8.37446	-0.0189422	0.365529	0.378522	-0.912368
KAZS33	-0.0164985	-0.0714659	0.13303	0.026644	-0.175803	-0.154209	-0.0673111				3.33166	-2.86145	-0.799714	-7.59822	-0.122833	-0.563506
KAZS34	-0.0201235	0.0334599	0.0448483	-0.0877118	-0.0112117	-0.0523341	-0.167881				-2.66273	0.340359	-2.95575	-0.872176	3.66782	2.20787
KAZS35											#DIV/0!	#DIV/0!	#DIV/0!	#DIV/0!	#DIV/0!	#DIV/0!
MONS1	-0.402165	-0.444546	-0.55259	-0.567577	-0.432331	-0.410778	-0.443244				0.105383	0.243042	0.0271218	-0.238286	-0.0498532	0.0790364
MONS2	-0.731817	-0.519173	-0.801492	-0.705311	-0.647809	-0.679606	-0.57481				-0.29057	0.543787	-0.120002	-0.0815271	0.0490831	-0.1542
MONS3	0.26163	-0.44682	-0.0938195	-0.146813	0.0868706	0.22699	0.182528				-2.70783	-0.790029	0.564844	-1.59171	1.61296	-0.195876
MONS4	-0.623349	-0.59771	-0.440748	-0.470195	-0.464688	-0.364172	-0.354602				-0.0411303	-0.262606	0.0668126	-0.0117135	-0.216308	-0.0262787
MONS5	-0.309717	-0.316341	-0.406457	-0.423524	-0.350202	-0.334446	-0.336979				0.021388	0.284869	0.0419904	-0.173123	-0.0449917	0.00757395
MONS6	-0.275311	-0.290376	-0.356651	-0.375307	-0.363681	-0.361931	-0.334043				0.0547182	0.228238	0.0523101	-0.0309769	-0.00481328	-0.0770519
MONS7	-0.296139	-0.33558	-0.203945	-0.253004	-0.224759	-0.241481	-0.228431				0.133184	-0.392261	0.24055	-0.111637	0.0743983	-0.0540433
MONS8	-0.494068	-0.480255	-0.518138	-0.468243	-0.41203	-0.347832	-0.266997				-0.0279576	0.0788809	-0.0962971	-0.120051	-0.155809	-0.232398
MONS9	-0.362314	-0.35189	-0.242735	-0.222138	-0.206997	-0.17847	-0.187323				-0.0287715	-0.310196	-0.0848563	-0.0681584	-0.137813	0.0496035
MONS10	-0.158248	-0.233183	-0.23657	-0.218967	-0.215816	-0.240834	-0.216915				0.473524	0.0145272	-0.0744099	-0.014391	0.115923	-0.0993172
MONS11	-0.392507	-0.383808	-0.403552	-0.367011	-0.374085	-0.362337	-0.378911				-0.022162	0.0514414	-0.090549	0.019276	-0.0314045	0.0457426
MONS12	-0.223509	-0.341561	-0.409386	-0.462096	-0.399905	-0.380584	-0.407814				0.528174	0.198574	0.128753	-0.134584	-0.0483144	0.0715476
MONS13	-0.169839	-0.210399	-0.225678	-0.230384	-0.203665	-0.21093	-0.210556				0.23881	0.0726212	0.0208544	-0.115977	0.0356719	-0.00177214
MONS14	-0.137314	-0.169667	-0.145106	-0.152972	-0.150407	-0.136517	-0.152903				0.235613	-0.144762	0.0542109	-0.016768	-0.0923513	0.120033
MONS15	-0.0938604	-0.0429475	-0.0800883	-0.0778215	-0.0719793	-0.0664791	-0.0624285				-0.542433	0.864797	-0.0283039	-0.0750719	-0.0764134	-0.0609305
MONS16	-0.166593	-0.179487	-0.195956	-0.213842	-0.171885	-0.171702	-0.152255				0.0773924	0.0917612	0.0912749	-0.196207	-0.00106749	-0.113257
MONS17	-0.593147	-0.441742	-0.662867	-0.577968	-0.546278	-0.543197	-0.493083				-0.255257	0.500576	-0.128078	-0.0548303	-0.00563974	-0.092258
MONS18	-0.566459	-0.629639	-0.733896	-0.709522	-0.588781	-0.558326	-0.63441				0.111534	0.165583	-0.0332121	-0.170173	-0.0517249	0.136272
MONS19	-0.284354	-0.289333	-0.343335	-0.278193	-0.270113	-0.262204	-0.252906				0.0175081	0.186645	-0.189732	-0.029048	-0.0292778	-0.0354629
MONS20	-0.332421	-0.424648	-0.513447	-0.400116	-0.364898	-0.563567	-0.406805				0.277439	0.209112	-0.220725	-0.0880195	0.544451	-0.27816
MONS21	-0.355259	-0.341438	-0.397994	-0.416233	-0.370885	-0.358462	-0.373085				-0.0389045	0.165641	0.0458269	-0.108948	-0.0334938	0.0407923
MONS22	-0.13932	-0.46905	-0.375314	-0.419036	-0.366713	-0.248777	-0.219074				2.36672	-0.199843	0.116495	-0.124865	-0.321603	-0.119398
MONS23	-0.559201	-0.655724	-0.764839	-0.66501	-0.562458	-0.595377	-0.492183				0.172608	0.166405	-0.130523	-0.154211	0.0585275	-0.173326
MONS24	-0.0521814	-0.0617568	-0.0608213	-0.063044	-0.060232	-0.0614481	-0.0554762				0.183503	-0.0151486	0.0365442	-0.0446027	0.0201894	-0.0971849
MONS25	-0.371206	-0.390913	-0.574643	-0.499979	-0.453594	-0.611262	-0.589925				0.0530896	0.470002	-0.129931	-0.0927738	0.347596	-0.0349055
MONS26	-0.390675	-0.453928	-0.512611	-0.457175	-0.38861	-0.428224	-0.429984				0.161908	0.129278	-0.108145	-0.149976	0.101938	0.00411154
MONS27	-0.498906	-0.536753	-0.54699	-0.445112	-0.479568	-0.392977	-0.422729				0.0758607	0.0190711	-0.186252	0.0774113	-0.180562	0.0757112
MONS28	-0.270435	-0.323569	-0.409991	-0.410123	-0.361494	-0.347764	-0.379669				0.196476	0.267089	0.000322756	-0.118573	-0.0379792	0.0917424
MONS29	-0.470614	-0.513655	-0.615887	-0.59729	-0.498855	-0.474023	-0.52421				0.0914576	0.199028	-0.0301952	-0.164802	-0.0497796	0.105876
MONS30	-0.193853	-0.254417	-0.397374	-0.326193	-0.273714	-0.273922	-0.301014				0.312425	0.5619	-0.179126	-0.160886	0.000761288	0.0989026
MONS31	-0.422611	-0.367194	-0.554997	-0.521077	-0.448346	-0.44365	-0.456304				-0.131131	0.511457	-0.061118	-0.139578	-0.0104749	0.0285225
MONS32	-0.412169	-0.34272	-0.523844	-0.451477	-0.412785	-0.419616	-0.340884				-0.168498	0.528493	-0.138146	-0.0857006	0.0165483	-0.187629
MONS33	-0.494756	-0.380236	-0.480565	-0.442049	-0.43452	-0.421013	-0.377808				-0.231467	0.263862	-0.080148	-0.0170315	-0.0310859	-0.102622
MONS34	-0.411679	-0.32986	-0.531587	-0.472699	-0.450975	-0.430954	-0.391895				-0.198746	0.611555	-0.110778	-0.0459574	-0.0443936	-0.0906338
MONS35	-0.0288448										-1	#DIV/0!	#DIV/0!	#DIV/0!	#DIV/0!	#DIV/0!
SRIS1	-0.180342	-0.63766	-0.405854	-0.201946	-0.300323	-0.358052	-0.286199				2.53584	-0.363526	-0.502416	0.48714	0.192226	-0.200678
SRIS2	-0.321485	-0.360462	-0.381365	-0.204878	-0.183419	-0.230194	-0.212731				0.12124	0.05799	-0.462779	-0.104738	0.255017	-0.0758642
SRIS3	0.146956	-0.141922	-0.410931	0.218585	-0.0927541	-0.306434	-0.0610733				-1.96574	1.89548	-1.53193	-1.42434	2.30372	-0.800697
SRIS4	-0.768328	-0.758086	-0.897714	-0.886115	-0.926945	-0.906728	-0.85102				-0.0133311	0.184185	-0.0129206	0.0460781	-0.0218107	-0.0614383
SRIS5	-0.294397	-0.26994	-0.279373	-0.219851	-0.256191	-0.243941	-0.225596				-0.0830741	0.0349441	-0.213056	0.165296	-0.0478183	-0.0752005
SRIS6	-0.22018	-0.479204	-0.351345	-0.247072	-0.279838	-0.334379	-0.317884				1.17642	-0.266815	-0.296781	0.132614	0.194904	-0.0493295
SRIS7	-0.323005	-0.315291	-0.477811	-0.24684	-0.308788	-0.2993	-0.270483				-0.0238819	0.515459	-0.483394	0.250965	-0.0307252	-0.0962805
SRIS8	-0.672331	-0.702216	-0.835551	-0.81683	-0.798167	-0.81499	-0.652043				0.0444492	0.189879	-0.0224062	-0.0228483	0.0210779	-0.199938
SRIS9	-0.326245	-0.351951	-0.357545	-0.302128	-0.318945	-0.379897	-0.432106				0.0787924	0.0158966	-0.154993	0.0556625	0.191105	0.137428
SRIS10	-0.170927	-0.510297	-0.356558	-0.236712	-0.267826	-0.338787	-0.319295				1.98548	-0.301274	-0.336119	0.131442	0.264953	-0.0575358
SRIS11	-0.13772	-0.512286	-0.259884	-0.0515533	-0.357829	-0.365709	-0.185796				2.71978	-0.492698	-0.801629	5.94095	0.0220218	-0.491958
SRIS12	-0.489771	-0.569881	-0.636437	-0.65286	-0.753301	-0.639848	-0.628589				0.163567	0.116789	0.0258051	0.153847	-0.150607	-0.0175972
SRIS13	-0.129348	-0.121707	-0.179373	-0.182664	-0.204485	-0.177397	-0.214383				-0.0590766	0.473812	0.0183481	0.119458	-0.13247	0.208494
SRIS14	-0.30428	-0.326886	-0.309075	-0.225858	-0.343423	-0.269896	-0.234335				0.074296	-0.0544868	-0.269245	0.520524	-0.2141	-0.131757
SRIS15	-0.264104	-0.245054	-0.268884	-0.277799	-0.395351	-0.270456	-0.219118				-0.0721283	0.0972418	0.0331581	0.423152	-0.31591	-0.189819
SRIS16	-0.244846	-0.293191	-0.320521	-0.145017	-0.310146	-0.277168	-0.20808				0.19745	0.0932129	-0.547556	1.13868	-0.10633	-0.249265
SRIS17	-0.424422	-0.489081	-0.505273	-0.281608	-0.276142	-0.286134	-0.28565				0.152346	0.0331056	-0.442661	-0.019412	0.0361863	-0.00169151
SRIS18	0.0526854	-0.369169	-0.337739	0.00138375	-0.0475156	-0.254256	-0.151927				-8.00705	-0.0851378	-1.0041	-35.3384	4.35099	-0.402465
SRIS19	-0.173642	-0.179261	-0.213656	-0.155676	-0.166885	-0.20395	-0.226435				0.0323628	0.191869	-0.271373	0.0720055	0.2221	0.110248
SRIS20	-0.506598	-0.472381	-0.539019	-0.341283	-0.510256	-0.477045	-0.311251				-0.0675425	0.141068	-0.366843	0.495109	-0.0650871	-0.347545
SRIS21	-0.311526	-0.332827	-0.52202	-0.301783	-0.477808	-0.532658	-0.38875				0.0683741	0.568443	-0.421894	0.583284	0.114795	-0.270168
SRIS22	-0.296006	-0.414911	-0.509681	-0.296011	-0.418858	-0.480203	-0.374401				0.401697	0.228409	-0.419223	0.415009	0.146459	-0.220329
SRIS23	-0.599894	-0.747967	-0.823286	-0.510464	-0.609712	-0.689036	-0.430694				0.246834	0.100697	-0.379968	0.194429	0.130101	-0.374932
SRIS24	-0.135293	-0.127419	-0.128778	-0.119683	-0.117692	-0.127146	-0.15452				-0.0581994	0.0106623	-0.0706189	-0.0166415	0.0803338	0.215289
SRIS25	-0.240322	-0.333184	-0.476082	-0.278824	-0.371418	-0.468464	-0.403625				0.386406	0.428887	-0.414336	0.332085	0.261287	-0.138407
SRIS26	-0.18994	-0.195601	-0.225776	-0.23766	-0.200412	-0.262354	-0.275755				0.0298015	0.154272	0.0526361	-0.156729	0.309074	0.0510782
SRIS27	-0.329471	-0.400826	-0.336953	-0.277578	-0.308568	-0.274316	-0.2619				0.216574	-0.159354	-0.176211	0.111643	-0.111004	-0.0452617
SRIS28	-0.215645	-0.24917	-0.360131	-0.27107	-0.350714	-0.3577	-0.273282				0.155466	0.445324	-0.247301	0.293812	0.0199184	-0.236001
SRIS29	-0.276778	-0.39902	-0.334637	-0.205279	-0.265842	-0.275132	-0.281673				0.441658	-0.161352	-0.386562	0.295025	0.0349488	0.0237711
SRIS30	-0.312607	-0.396191	-0.349403	-0.278568	-0.285861	-0.214808	-0.27884				0.267379	-0.118095	-0.202732	0.0261812	-0.248557	0.298085
SRIS31	-0.410915	-0.443323	-0.338636	-0.235453	-0.269211	-0.317615	-0.334576				0.0788697	-0.236141	-0.304701	0.143372	0.179798	0.0534015
SRIS32	-0.277578	-0.3014	-0.178048	-0.0882601	-0.120525	-0.178549	-0.209973				0.0858214	-0.409264	-0.504291	0.365567	0.481428	0.175997
SRIS33	-0.294037	-0.29772	-0.249814	-0.224606	-0.239818	-0.239876	-0.254636				0.0125266	-0.160911	-0.100905	0.0677261	0.000243806	0.0615309
SRIS34	-0.228592	-0.455601	-0.344316	-0.140942	-0.375754	-0.330675	-0.107395				0.993078	-0.244259	-0.590662	1.66603	-0.119969	-0.675226
SRIS35											#DIV/0!	#DIV/0!	#DIV/0!	#DIV/0!	#DIV/0!	#DIV/0!
PAKS1	-0.244367	-0.170673	-0.198431	0.00992638	-0.0641379	0.122575	0.11984				-0.301571	0.162636	-1.05002	-7.46136	-2.91111	-0.0223094
PAKS2	-0.159193	0.0138848	-0.0776634	-0.108897	-0.166803	-0.125477	-0.192515				-1.08722	-6.59341	0.402172	0.531743	-0.247752	0.53426
PAKS3	0.469882	0.55125	0.497434	0.653891	0.665158	0.655115	0.676614				0.173167	-0.0976263	0.314529	0.0172306	-0.0150982	0.0328168
PAKS4	0.145981	0.415924	0.154895	0.227418	-0.0706901	-0.137365	-0.276747				1.84916	-0.627588	0.468208	-1.31084	0.943196	1.01469
PAKS5	-0.33904	-0.270754	-0.267844	-0.228615	-0.182768	-0.147742	-0.149014				-0.201412	-0.0107453	-0.146461	-0.200543	-0.191641	0.00860388
PAKS6	-0.167818	-0.136958	-0.154916	-0.118679	-0.0762201	-0.112898	-0.0906134				-0.183886	0.131117	-0.233913	-0.357764	0.481214	-0.197389
PAKS7	-0.339022	-0.222701	-0.324423	-0.221023	-0.135197	-0.22751	-0.135686				-0.343107	0.456763	-0.31872	-0.388314	0.682808	-0.403604
PAKS8	-0.421824	-0.439047	-0.552334	-0.657143	-0.496745	-0.743089	-0.686098				0.040831	0.258027	0.189758	-0.244084	0.495916	-0.0766957
PAKS9	-0.333807	-0.354065	-0.394646	-0.268567	-0.34784	-0.22746	0.0811495				0.0606881	0.114614	-0.319475	0.295173	-0.34608	-1.35676
PAKS10	-0.302847	-0.297715	-0.326403	-0.262435	-0.26981	-0.22917	-0.102581				-0.0169465	0.0963635	-0.195978	0.0280997	-0.150625	-0.552378
PAKS11	-0.43786	-0.26947	-0.432178	-0.420731	-0.50573	-0.576704	-0.60576				-0.384576	0.603809	-0.0264854	0.202027	0.140339	0.0503835
PAKS12	-0.489204	-0.324368	-0.494626	-0.318294	-0.36594	-0.497013	-0.597003				-0.336948	0.524891	-0.356495	0.149692	0.358181	0.201182
PAKS13	-0.328712	-0.240169	-0.309618	-0.281501	-0.327574	-0.34919	-0.348687				-0.269364	0.289168	-0.0908108	0.163669	0.0659893	-0.00144032
PAKS14	-0.389273	-0.456321	-0.346993	-0.214398	-0.199582	-0.236857	-0.257862				0.17224	-0.239585	-0.382126	-0.0691056	0.186762	0.0886857
PAKS15	-0.476505	-0.592597	-0.560056	-0.272411	-0.229944	-0.351732	-0.376386				0.243631	-0.0549118	-0.5136	-0.155895	0.529645	0.0700908
PAKS16	-0.386398	-0.557399	-0.325368	-0.686346	-0.154544	-0.394926	-0.122991				0.44255	-0.416274	1.10945	-0.774831	1.55543	-0.688571
PAKS17	-0.560808	-0.169361	-0.639435	-0.525567	-0.683248	-0.829249	-0.836507				-0.698005	2.77557	-0.178076	0.300021	0.213686	0.00875257
PAKS18	-0.43965	-0.117094	-0.441558	-0.140047	0.0518602	-0.0348021	-0.255928				-0.733665	2.77096	-0.682834	-1.37031	-1.67108	6.3538
PAKS19	-0.334063	-0.25608	-0.301204	-0.260113	-0.185477	-0.144043	-0.139148				-0.23344	0.176213	-0.136422	-0.286935	-0.223396	-0.0339815
PAKS20	-0.440435	-0.297208	-0.418388	-0.298861	-0.195743	-0.187557	0.0325391				-0.325195	0.407727	-0.285684	-0.345036	-0.041823	-1.17349
PAKS21	-0.459953	-0.201921	-0.463374	-0.179518	0.00212873	-0.289285	0.105413				-0.560997	1.29483	-0.612585	-1.01186	-136.896	-1.36439
PAKS22	-0.332575	-0.0504898	-0.331672	-0.264808	-0.459982	-0.478184	-0.557212				-0.848185	5.56908	-0.201597	0.73704	0.0395718	0.165267
PAKS23	-0.612922	-0.214306	-0.690678	-0.179673	0.0535695	-0.346554	-0.295277				-0.650353	2.22286	-0.73986	-1.29815	-7.46925	-0.147965
PAKS24	-0.110042	-0.0917589	-0.105821	-0.129702	-0.10325	-0.0849852	-0.0772165				-0.166147	0.153253	0.22567	-0.203944	-0.176899	-0.0914121
PAKS25	-0.21895	-0.230459	-0.29434	-0.318162	-0.155124	-0.39851	-0.299848				0.0525617	0.277189	0.0809345	-0.512437	1.56898	-0.247579
PAKS26	-0.197771	-0.138934	-0.182226	-0.20459	-0.178091	-0.161636	-0.166147				-0.297504	0.311605	0.122725	-0.129522	-0.0923974	0.0279081
PAKS27	0.0814016	0.203403	0.0644464	0.0559205	0.0400355	0.163106	-0.050771				1.49876	-0.683159	-0.132295	-0.284064	3.07404	-1.31128
PAKS28	-0.172897	-0.0245198	-0.112855	-0.117343	-0.188205	-0.122903	-0.107621				-0.858183	3.60262	0.0397689	0.603883	-0.346972	-0.124341
PAKS29	-0.202479	-0.130461	-0.186572	-0.208636	-0.191604	-0.173801	-0.172043				-0.355683	0.430101	0.118258	-0.0816328	-0.0929172	-0.0101163
PAKS30	-0.127288	0.0974514	-0.0498269	-0.0579903	-0.195511	-0.13963	-0.198268				-1.7656	-1.5113	0.163836	2.37145	-0.285821	0.419953
PAKS31	-0.462823	-0.157251	-0.458388	-0.111647	-0.344596	-0.334013	-0.481231				-0.660235	1.91501	-0.756437	2.08649	-0.030711	0.440755
PAKS32	-0.303217	-0.190965	-0.276561	-0.281014	-0.424924	-0.4357	-0.442699				-0.370204	0.448227	0.0161006	0.512112	0.0253594	0.0160642
PAKS33	-0.300735	-0.297421	-0.32109	-0.272302	-0.456218	-0.46068	-0.489065				-0.0110218	0.0795828	-0.151946	0.675411	0.00978208	0.0616153
PAKS34	-0.0632561	0.112935	-0.00238448	-0.0416105	-0.111174	-0.0705467	-0.102				-2.78536	-1.02111	16.4505	1.67178	-0.365438	0.445846
PAKS35											#DIV/0!	#DIV/0!	#DIV/0!	#DIV/0!	#DIV/0!	#DIV/0!
FIJS1	-0.24334	-0.438111	-0.192748	-0.241285	-0.286962	-0.375446	-0.333871				0.800406	-0.560047	0.251816	0.189306	0.308347	-0.110735
FIJS2	-0.369833	-0.302758	-0.327995	-0.40116	-0.486455	-0.505642	-0.526022				-0.181364	0.0833551	0.223069	0.212621	0.0394435	0.0403038
FIJS3	-0.294156	-0.0472133	0.0282142	-0.178796	-0.462995	-0.515151	-0.548753				-0.839496	-1.59759	-7.33708	1.58952	0.11265	0.0652272
FIJS4	-0.411549	-0.163586	-0.19738	-0.208132	-0.261333	-0.304796	-0.284775				-0.602512	0.206584	0.0544733	0.255612	0.166313	-0.065688
FIJS5	-0.319292	-0.220611	-0.238237	-0.270345	-0.406846	-0.226746	-0.196979				-0.309061	0.0798983	0.13477	0.504916	-0.442673	-0.131278
FIJS6	-0.294931	-0.405274	-0.236478	-0.250169	-0.372726	-0.385982	-0.376713				0.37413	-0.416498	0.0578972	0.489896	0.035565	-0.0240139
FIJS7	-0.411792	-0.234155	-0.267753	-0.252969	-0.25718	-0.308961	-0.339586				-0.431377	0.143488	-0.0552158	0.0166455	0.201342	0.0991234
FIJS8											#DIV/0!	#DIV/0!	#DIV/0!	#DIV/0!	#DIV/0!	#DIV/0!
FIJS9	-0.483337	-0.41542	-0.464245	-0.487459	-0.404134	-0.315476	-0.273885				-0.140518	0.117531	0.0500052	-0.170937	-0.219378	-0.131837
FIJS10	-0.405943	-0.324591	-0.140562	-0.341336	-0.198637	-0.283207	-0.212231				-0.200402	-0.566958	1.42837	-0.418059	0.425747	-0.250613
FIJS11	-0.206161	0.0469073	-0.051442	-0.0100971	-0.220307	-0.356169	-0.314942				-1.22753	-2.09667	-0.80372	20.8189	0.616695	-0.115752
FIJS12	-0.5735	-0.364061	-0.421556	-0.515546	-0.626334	-0.678621	-0.578319				-0.365194	0.157928	0.222958	0.214895	0.0834811	-0.147803
FIJS13	-0.259868	-0.175842	-0.207277	-0.297189	-0.267501	-0.240276	-0.24837				-0.323339	0.178768	0.433775	-0.0998957	-0.101775	0.0336836
FIJS14											#DIV/0!	#DIV/0!	#DIV/0!	#DIV/0!	#DIV/0!	#DIV/0!
FIJS15	-0.200632	-0.116243	-0.141737	-0.17819	-0.166218	-0.200418	-0.190092				-0.420617	0.219319	0.257187	-0.0671882	0.205759	-0.0515254
FIJS16	-0.302308	-0.358746	-0.263612	-0.300067	-0.349203	-0.321867	-0.321522				0.186689	-0.265184	0.138288	0.163751	-0.0782801	-0.00107147
FIJS17	-0.667654	-0.559309	-0.638886	-0.643998	-0.496094	-0.393786	-0.324166				-0.162278	0.142279	0.00800115	-0.229665	-0.206228	-0.176797
FIJS18	-0.109351	0.256899	0.19014	0.0978867	-0.0985779	-0.64328	-0.670574				-3.34931	-0.259865	-0.485186	-2.00706	5.5256	0.0424294
FIJS19	-0.234339	-0.156479	-0.223207	-0.201199	-0.208854	-0.256373	-0.296323				-0.332253	0.426428	-0.0985971	0.0380478	0.227518	0.155831
FIJS20	-0.501341	-0.377524	-0.441378	-0.0732444	-0.142748	-0.620121	-0.65042				-0.246972	0.169139	-0.834055	0.948925	3.34417	0.0488595
FIJS21	-0.402022	-0.257096	-0.261798	-0.19843	0.0810277	-0.015132	0.0409824				-0.360492	0.0182877	-0.242047	-1.40834	-1.18675	-3.70832
FIJS22	-0.365054	-0.267447	-0.161353	-0.450335	-0.510266	-0.479365	-0.487507				-0.267375	-0.396693	1.791	0.133082	-0.0605597	0.016985
FIJS23	-0.628233	-0.492448	-0.587273	-0.579778	-0.61852	-0.61979	-0.517375				-0.216137	0.192559	-0.0127631	0.0668216	0.00205351	-0.165241
FIJS24	-0.497388	-0.40539	-0.636551	-0.606624	-0.582011	-0.561897	-0.523629				-0.184963	0.57022	-0.0470149	-0.0405738	-0.0345598	-0.0681044
FIJS25	-0.813839	-0.820331	-0.794358	-0.787727	-0.711265	-0.905924	-0.901815				0.00797762	-0.0316617	-0.00834805	-0.0970663	0.27368	-0.0045355
FIJS26	-0.541247	-0.642576	-0.44965	-0.432932	-0.261959	-0.458556	-0.358441				0.187215	-0.300239	-0.0371794	-0.394919	0.750486	-0.218325
FIJS27	-0.367309	-0.25331	-0.205355	-0.272439	-0.190168	-0.302164	-0.344659				-0.310363	-0.189311	0.32667	-0.30198	0.588934	0.140635
FIJS28	-0.223073	-0.112128	-0.243679	-0.0877553	-0.192102	-0.391036	-0.443078				-0.497349	1.17322	-0.639873	1.18906	1.03557	0.133087
FIJS29	-0.0608308	0.135209	-0.000779218	0.12913	0.0020073	-0.224425	-0.280744				-3.22271	-1.00576	-166.718	-0.984455	-112.805	0.250946
FIJS30	-0.0918209	-0.0282452	-0.0784339	-0.0614083	-0.200373	-0.573705	-0.722037				-0.692388	1.7769	-0.217069	2.26296	1.86318	0.258553
FIJS31	-0.566833	-0.379139	-0.568814	-0.234504	-0.418162	-0.681937	-0.631538				-0.331127	0.500278	-0.587732	0.783177	0.630797	-0.0739057
FIJS32	-0.288363	-0.187865	-0.218465	-0.176253	-0.072875	-0.26832	-0.319813				-0.348512	0.162879	-0.193219	-0.586533	2.68193	0.191907
FIJS33	-0.364037	-0.303414	-0.28231	-0.332151	-0.402348	-0.344273	-0.373566				-0.16653	-0.0695559	0.176549	0.211338	-0.14434	0.0850862
FIJS34	-0.345043	-0.391794	-0.237212	-0.225816	-0.230063	-0.321925	-0.349719				0.135491	-0.394548	-0.0480439	0.0188111	0.399287	0.0863369
FIJS35											#DIV/0!	#DIV/0!	#DIV/0!	#DIV/0!	#DIV/0!	#DIV/0!
LAOS1	-0.83224	-0.800099	-0.780817	-0.676358	-0.734949	-0.811768	-0.726098				-0.0386199	-0.0240998	-0.133782	0.0866274	0.104523	-0.105535
LAOS2	-0.883688	-0.843431	-0.842132	-0.729381	-0.77374	-0.883981	-0.859319				-0.0455554	-0.00154018	-0.133888	0.0608182	0.142477	-0.0278981
LAOS3	-0.53415	-0.456259	-0.483781	-0.249577	-0.421223	-0.599706	-0.617135				-0.145821	0.0603197	-0.484111	0.687743	0.423727	0.0290621
LAOS4	-0.548827	-0.511381	-0.496522	-0.408769	-0.453308	-0.656869	-0.700694				-0.0682285	-0.0290568	-0.176737	0.10896	0.449056	0.0667193
LAOS5	-0.36114	-0.331097	-0.318434	-0.270345	-0.284953	-0.392146	-0.411054				-0.0831883	-0.0382475	-0.151017	0.0540364	0.376178	0.0482157
LAOS6	-0.71546	-0.676094	-0.667612	-0.573686	-0.618925	-0.693004	-0.609565				-0.0550223	-0.0125446	-0.14069	0.078856	0.11969	-0.120402
LAOS7	-0.365935	-0.669315	-0.660441	-0.542307	-0.593568	-0.689615	-0.613563				0.829055	-0.0132588	-0.178872	0.0945253	0.161813	-0.110282
LAOS8	-0.751699	-0.676507	-0.544684	-0.592954	-0.516952	-0.640792	-0.591531				-0.10003	-0.194858	0.0886205	-0.128175	0.239557	-0.0768753
LAOS9	-0.625389	-0.398086	-0.428074	-0.399303	-0.243188	-0.31946	-0.334184				-0.363459	0.0753297	-0.0672088	-0.390969	0.313635	0.0460881
LAOS10	-0.555594	-0.328052	-0.361795	-0.35893	-0.268319	-0.334308	-0.317696				-0.409546	0.102858	-0.00791905	-0.252448	0.245937	-0.0496923
LAOS11	-0.766765	-0.70051	-0.697136	-0.632834	-0.622852	-0.682975	-0.662885				-0.0864075	-0.00481679	-0.0922374	-0.015774	0.0965289	-0.0294147
LAOS12	-0.747228	-0.611709	-0.629859	-0.619395	-0.397146	-0.550364	-0.47016				-0.181362	0.0296702	-0.0166132	-0.358816	0.385799	-0.14573
LAOS13	-0.0779351	-0.0709201	-0.0726019	-0.071448	-0.0676337	-0.0759882	-0.0717798				-0.0900103	0.0237137	-0.0158939	-0.0533851	0.123525	-0.0553816
LAOS14	-0.34133	-0.24112	-0.223952	-0.316639	-0.178576	-0.17549	-0.222415				-0.293586	-0.0712036	0.413871	-0.436025	-0.0172814	0.267388
LAOS15	-0.308102	-0.219214	-0.231864	-0.204933	-0.165726	-0.171389	-0.167732				-0.288502	0.0577067	-0.116151	-0.191316	0.0341743	-0.0213373
LAOS16	-0.589654	-0.551003	-0.549212	-0.475452	-0.491021	-0.566176	-0.510792				-0.0655486	-0.00325019	-0.134302	0.0327462	0.153059	-0.0978225
LAOS17	-0.821723	-0.752098	-0.810449	-0.794118	-0.866885	-0.877471	-0.85256				-0.0847305	0.0775854	-0.0201515	0.0916332	0.0122117	-0.0283899
LAOS18	-0.924793	-0.894839	-0.878139	-0.839805	-0.898706	-0.934373	-0.936127				-0.0323899	-0.0186627	-0.0436533	0.0701371	0.0396865	0.00187769
LAOS19	-0.676462	-0.591941	-0.603756	-0.603209	-0.61954	-0.679777	-0.617365				-0.124947	0.0199596	-0.000905721	0.0270742	0.0972288	-0.0918126
LAOS20	-0.59534	-0.560186	-0.376537	-0.603658	-0.494954	-0.49383	-0.484568				-0.0590492	-0.327836	0.603186	-0.180076	-0.0022703	-0.0187551
LAOS21	-0.726904	-0.693848	-0.718368	-0.516825	-0.668472	-0.74731	-0.646089				-0.0454744	0.0353398	-0.280557	0.293421	0.117937	-0.135446
LAOS22	-0.565131	-0.498102	-0.498255	-0.426655	-0.494554	-0.577644	-0.57919				-0.118608	0.000306316	-0.1437	0.159141	0.168009	0.00267743
LAOS23	-0.738752	-0.673072	-0.684825	-0.53935	-0.62341	-0.767178	-0.685123				-0.0889069	0.0174625	-0.212427	0.155855	0.230615	-0.106957
LAOS24	-0.776194	-0.743507	-0.717996	-0.656651	-0.568235	-0.671635	-0.640462				-0.0421111	-0.0343125	-0.0854385	-0.134647	0.181966	-0.0464128
LAOS25	-0.689678	-0.729636	-0.700345	-0.467787	-0.348152	-0.497763	-0.448832				0.0579378	-0.0401457	-0.332062	-0.255746	0.429728	-0.0983011
LAOS26	-0.677692	-0.659251	-0.632175	-0.492569	-0.426588	-0.474864	-0.420967				-0.0272114	-0.0410712	-0.220835	-0.133953	0.113169	-0.1135
LAOS27	-0.493594	-0.421903	-0.430734	-0.415072	-0.404123	-0.430324	-0.411773				-0.145243	0.0209301	-0.0363607	-0.0263791	0.0648348	-0.0431082
LAOS28	-0.710329	-0.502729	-0.448549	-0.428026	-0.466824	-0.478226	-0.49845				-0.292259	-0.107772	-0.0457528	0.0906424	0.0244261	0.0422893
LAOS29	-0.734559	-0.706269	-0.604507	-0.582175	-0.627958	-0.656661	-0.672423				-0.038513	-0.144085	-0.0369414	0.0786415	0.0457072	0.0240032
LAOS30	-0.53147	-0.457847	-0.396703	-0.346338	-0.403447	-0.445379	-0.374845				-0.138528	-0.133545	-0.126959	0.164891	0.103935	-0.158367
LAOS31	-0.82588	-0.727992	-0.74895	-0.629163	-0.695482	-0.751843	-0.704737				-0.118525	0.0287885	-0.159939	0.105408	0.0810388	-0.0626548
LAOS32	-0.577248	-0.598225	-0.424469	-0.408242	-0.425221	-0.428695	-0.452464				0.0363405	-0.290453	-0.03823	0.0415915	0.00817002	0.0554447
LAOS33	-0.689912	-0.639729	-0.495841	-0.471319	-0.338076	-0.331551	-0.337633				-0.0727381	-0.224921	-0.0494553	-0.282702	-0.0193014	0.0183447
LAOS34	-0.694201	-0.59366	-0.592925	-0.640944	-0.582167	-0.524272	-0.392827				-0.144829	-0.00123878	0.0809868	-0.0917033	-0.099448	-0.25072
LAOS35											#DIV/0!	#DIV/0!	#DIV/0!	#DIV/0!	#DIV/0!	#DIV/0!
BRUS1	-0.679736	-0.714142	-0.785514	-0.814192	-0.770954	-0.714667	-0.757718				0.0506167	0.0999411	0.0365078	-0.0531045	-0.0730102	0.0602401
BRUS2	0.20934	-0.0762303	-0.8528	-0.637664	-0.892405	-0.922689	-0.829532				-1.36415	10.1871	-0.25227	0.399491	0.0339354	-0.100962
BRUS3	-0.545625	-0.576953	-0.488204	-0.508839	-0.505539	-0.461139	-0.561634				0.0574168	-0.153824	0.042268	-0.00648595	-0.0878269	0.217927
BRUS4	-0.313413	-0.341404	-0.431269	-0.296527	-0.307434	-0.301242	-0.308301				0.0893103	0.26322	-0.31243	0.0367828	-0.0201418	0.0234331
BRUS5											#DIV/0!	#DIV/0!	#DIV/0!	#DIV/0!	#DIV/0!	#DIV/0!
BRUS6	-0.208096	-0.202748	-0.301927	-0.408026	-0.466781	-0.459988	-0.438116				-0.0257004	0.489176	0.351404	0.143998	-0.0145522	-0.0475499
BRUS7	-0.236354	-0.220131	-0.317096	-0.402893	-0.430959	-0.428928	-0.393842				-0.0686403	0.440489	0.27057	0.0696627	-0.00471292	-0.0818006
BRUS8	0.508265	0.44883	-0.665891	-0.276016	-0.940702	-0.950742	-0.896993				-0.116938	-2.48362	-0.585494	2.40814	0.0106727	-0.0565333
BRUS9	-0.377798	-0.436245	-0.695839	-0.663696	-0.779776	-0.798731	-0.743465				0.154704	0.595063	-0.0461929	0.174898	0.0243092	-0.0691924
BRUS10	-0.132802	-0.144863	-0.142553	-0.212041	-0.216226	-0.217229	-0.198009				0.0908174	-0.0159446	0.487448	0.0197385	0.00463705	-0.0884749
BRUS11	-0.456525	-0.554678	-0.529269	-0.508812	-0.581578	-0.451023	-0.507435				0.215	-0.0458077	-0.0386516	0.143011	-0.224483	0.125076
BRUS12	-0.356769	-0.394635	-0.477338	-0.563351	-0.636936	-0.66249	-0.639645				0.106137	0.209567	0.180195	0.130619	0.0401213	-0.0344838
BRUS13	-0.0800084	-0.0816955	-0.0806263	-0.0975464	-0.0982387	-0.10651	-0.104558				0.0210863	-0.013088	0.20986	0.0070966	0.0841977	-0.0183295
BRUS14	-0.239838	-0.264231	-0.375259	-0.313572	-0.41184	-0.407183	-0.38224				0.101705	0.420192	-0.164385	0.313383	-0.0113085	-0.0612571
BRUS15	-0.13696	-0.147308	-0.148759	-0.168388	-0.20146	-0.212073	-0.198189				0.0755579	0.00984546	0.131951	0.196408	0.052678	-0.0654691
BRUS16	-0.535794	-0.492742	-0.583746	-0.460149	-0.486736	-0.424277	-0.543908				-0.0803525	0.184689	-0.211731	0.0577792	-0.128321	0.281962
BRUS17	-0.389309	-0.446177	-0.67365	-0.65973	-0.761027	-0.774481	-0.738205				0.146073	0.509827	-0.0206635	0.153543	0.0176787	-0.0468387
BRUS18	-0.79879	-0.785485	-0.74305	-0.79453	-0.81406	-0.757961	-0.816229				-0.0166566	-0.0540231	0.0692822	0.0245799	-0.0689126	0.0768749
BRUS19	-0.304341	-0.316701	-0.386803	-0.489553	-0.521045	-0.5423	-0.467553				0.0406125	0.221352	0.265639	0.0643277	0.0407921	-0.137832
BRUS20	-0.674452	-0.591355	-0.713703	-0.612019	-0.641585	-0.668609	-0.71683				-0.123207	0.206894	-0.142474	0.0483086	0.0421219	0.0721204
BRUS21	-0.305187	-0.47248	-0.595542	-0.639426	-0.717101	-0.730136	-0.645408				0.548162	0.260461	0.0736877	0.121476	0.0181771	-0.116044
BRUS22	-0.706503	-0.73579	-0.79279	-0.789957	-0.816601	-0.777604	-0.684118				0.0414534	0.0774679	-0.00357302	0.0337288	-0.0477562	-0.120223
BRUS23	-0.224871	-0.189696	-0.231766	-0.321775	-0.36588	-0.359847	-0.301356				-0.156423	0.22178	0.388359	0.137068	-0.0164884	-0.162546
BRUS24	-0.268094	-0.405209	-0.759731	-0.655758	-0.854158	-0.86784	-0.833356				0.511442	0.874913	-0.136856	0.302552	0.0160178	-0.0397359
BRUS25	-0.388802	-0.515765	-0.677187	-0.575813	-0.683584	-0.783358	-0.785869				0.326548	0.312975	-0.149699	0.187163	0.145958	0.00320516
BRUS26	-0.547345	-0.544481	-0.508666	-0.484442	-0.547033	-0.479161	-0.494608				-0.00523241	-0.0657782	-0.0476236	0.129202	-0.124072	0.0322372
BRUS27	-0.338505	-0.367392	-0.550858	-0.593572	-0.658166	-0.653674	-0.524557				0.0853372	0.499374	0.0775401	0.108822	-0.00682436	-0.197525
BRUS28	-0.33504	-0.444595	-0.595397	-0.671769	-0.802096	-0.816993	-0.770094				0.32699	0.339189	0.12827	0.194005	0.0185725	-0.0574035
BRUS29	-0.318761	-0.344359	-0.46784	-0.529995	-0.56379	-0.564023	-0.553259				0.0803035	0.358582	0.132857	0.0637633	0.000413358	-0.0190843
BRUS30	-0.577815	-0.55502	-0.692614	-0.619822	-0.804735	-0.637085	-0.724508				-0.0394508	0.247908	-0.105097	0.298333	-0.20833	0.137223
BRUS31	-0.0158562	-0.36634	-0.717324	-0.653817	-0.842302	-0.863465	-0.802515				22.104	0.958083	-0.0885334	0.288285	0.0251252	-0.0705884
BRUS32	-0.349066	-0.452729	-0.563819	-0.617245	-0.765709	-0.700108	-0.625773				0.29697	0.245381	0.0947558	0.240527	-0.0856733	-0.106176
BRUS33	-0.483069	-0.538863	-0.726096	-0.723904	-0.673828	-0.70322	-0.628152				0.115501	0.347459	-0.00301964	-0.069174	0.0436187	-0.10675
BRUS34	-0.283941	-0.29638	-0.400343	-0.609609	-0.68112	-0.676945	-0.605287				0.0438091	0.350775	0.522718	0.117307	-0.00612944	-0.105855
BRUS35											#DIV/0!	#DIV/0!	#DIV/0!	#DIV/0!	#DIV/0!	#DIV/0!
BHUS1	-0.598972	-0.678401	-0.581182	-0.571075	-0.868813	-0.895278	-0.873035				0.13261	-0.143306	-0.0173911	0.521364	0.0304605	-0.0248445
BHUS2	-0.466411	-0.696377	-0.717165	-0.650803	-0.68339	-0.767353	-0.778866				0.493054	0.0298518	-0.0925349	0.0500734	0.122861	0.0150044
BHUS3	-0.341689	-0.525705	-0.562088	-0.596294	-0.807202	-0.868776	-0.859157				0.538548	0.069209	0.0608544	0.353699	0.07628	-0.0110719
BHUS4	-0.40456	-0.379749	-0.424787	-0.450587	-0.372879	-0.289309	-0.315897				-0.0613272	0.1186	0.0607361	-0.172461	-0.22412	0.0919028
BHUS5	-0.200326	-0.161849	-0.212707	-0.202517	-0.166146	-0.126663	-0.153221				-0.192072	0.314235	-0.0479046	-0.179595	-0.237643	0.209676
BHUS6	-0.415756	-0.457067	-0.434791	-0.412909	-0.532204	-0.531981	-0.566641				0.0993642	-0.0487377	-0.0503268	0.288912	-0.000418895	0.0651526
BHUS7	-0.38569	-0.431759	-0.487032	-0.508908	-0.656342	-0.671069	-0.607054				0.119445	0.128016	0.0449182	0.289705	0.0224392	-0.0953932
BHUS8											#DIV/0!	#DIV/0!	#DIV/0!	#DIV/0!	#DIV/0!	#DIV/0!
BHUS9	-0.433547	-0.622777	-0.623443	-0.676704	-0.601004	-0.663557	-0.686126				0.43647	0.00106933	0.085431	-0.111866	0.104081	0.0340121
BHUS10	-0.340022	-0.475536	-0.484602	-0.368585	-0.472439	-0.506124	-0.461154				0.398547	0.0190648	-0.239407	0.281763	0.0713008	-0.0888516
BHUS11	-0.357783	-0.638505	-0.632764	-0.664164	-0.599508	-0.653736	-0.679293				0.784615	-0.00899118	0.0496224	-0.0973493	0.0904553	0.0390936
BHUS12	-0.503966	-0.642306	-0.645802	-0.670683	-0.762122	-0.863086	-0.852526				0.274504	0.00544264	0.0385267	0.136337	0.132478	-0.012235
BHUS13	-0.442713	-0.53174	-0.545888	-0.584974	-0.641341	-0.697008	-0.693496				0.201094	0.0266068	0.071601	0.0963591	0.0867974	-0.00503919
BHUS14	-0.446551	-0.580451	-0.594079	-0.621083	-0.613188	-0.653687	-0.627366				0.299853	0.0234786	0.0454559	-0.0127111	0.0660454	-0.0402644
BHUS15	-0.449314	-0.636691	-0.644006	-0.653201	-0.679113	-0.725026	-0.719391				0.417028	0.0114895	0.0142766	0.0396704	0.0676075	-0.00777308
BHUS16	-0.430281	-0.651386	-0.651605	-0.674943	-0.742436	-0.757041	-0.671				0.513862	0.000335781	0.0358172	0.099998	0.0196718	-0.113655
BHUS17	-0.533199	-0.837886	-0.835204	-0.804219	-0.857035	-0.898768	-0.898113				0.571431	-0.00320116	-0.0370987	0.0656746	0.0486946	-0.000729048
BHUS18	-0.787558	-0.713015	-0.808631	-0.617111	-0.861305	-0.872416	-0.817854				-0.0946509	0.1341	-0.236845	0.395706	0.012901	-0.062542
BHUS19	-0.372099	-0.439064	-0.49403	-0.498861	-0.472131	-0.475181	-0.464823				0.179964	0.125191	0.0097774	-0.0535809	0.00645873	-0.0217971
BHUS20	-0.608255	-0.674418	-0.720003	-0.687953	-0.733002	-0.731323	-0.702332				0.108775	0.0675916	-0.0445145	0.0654833	-0.00229076	-0.0396412
BHUS21	-0.651574	-0.705011	-0.748175	-0.693022	-0.768067	-0.757306	-0.715388				0.0820133	0.0612235	-0.0737162	0.108286	-0.0140103	-0.0553507
BHUS22	-0.464911	-0.542014	-0.505363	-0.444533	-0.633917	-0.693768	-0.721518				0.165846	-0.0676204	-0.120369	0.42603	0.0944135	0.0399996
BHUS23	-0.826215	-0.858558	-0.894722	-0.826436	-0.934962	-0.919132	-0.885239				0.0391462	0.0421213	-0.0763203	0.131318	-0.0169312	-0.0368751
BHUS24	-0.149842	-0.156025	-0.220975	-0.1699	-0.198428	-0.164978	-0.162039				0.0412644	0.416277	-0.231136	0.167914	-0.168579	-0.01781
BHUS25	-0.710376	-0.668332	-0.784904	-0.729913	-0.65441	-0.845683	-0.891116				-0.0591853	0.174422	-0.0700611	-0.103441	0.292284	0.053723
BHUS26	-0.259395	-0.305778	-0.31707	-0.219265	-0.241643	-0.314361	-0.316857				0.178811	0.0369285	-0.308465	0.10206	0.300934	0.0079384
BHUS27	-0.559719	-0.575156	-0.594093	-0.613571	-0.553533	-0.563277	-0.62907				0.0275792	0.0329261	0.0327859	-0.0978495	0.0176023	0.116805
BHUS28	-0.534382	-0.623486	-0.672273	-0.66851	-0.629191	-0.625251	-0.607835				0.166742	0.0782495	-0.00559673	-0.0588158	-0.00626326	-0.0278541
BHUS29	-0.441419	-0.198079	-0.212766	-0.292274	-0.521143	-0.458555	-0.639858				-0.551268	0.074149	0.373687	0.783061	-0.120097	0.395378
BHUS30	-0.371877	-0.414039	-0.39818	-0.543825	-0.402255	-0.558352	-0.602354				0.113377	-0.0383032	0.365777	-0.260322	0.388054	0.0788064
BHUS31	-0.69193	-0.633133	-0.705872	-0.502228	-0.69949	-0.668252	-0.626558				-0.0849756	0.114888	-0.288501	0.392776	-0.0446583	-0.0623937
BHUS32	-0.365199	-0.437212	-0.565446	-0.54966	-0.633109	-0.543576	-0.562553				0.197189	0.2933	-0.0279173	0.151819	-0.141419	0.0349112
BHUS33	-0.374208	-0.4349	-0.516407	-0.476096	-0.411808	-0.506165	-0.572905				0.162188	0.187416	-0.0780621	-0.135032	0.229129	0.131854
BHUS34	-0.355521	-0.390719	-0.46999	-0.507892	-0.294337	-0.380433	-0.379938				0.0990024	0.202885	0.0806445	-0.420473	0.292507	-0.00130135
BHUS35											#DIV/0!	#DIV/0!	#DIV/0!	#DIV/0!	#DIV/0!	#DIV/0!
KGZS1	-0.156936	-0.551314	-0.56983	-0.614234	-0.840205	-0.841859	-0.790827				2.513	0.0335845	0.0779243	0.367891	0.00196913	-0.0606187
KGZS2	-0.46458	-0.599235	-0.572407	-0.69879	-0.702912	-0.613921	-0.581792				0.289844	-0.0447704	0.220791	0.00589866	-0.126604	-0.0523328
KGZS3	-0.310563	-0.56535	-0.59926	-0.544732	-0.715139	-0.716309	-0.659873				0.820406	0.0599801	-0.0909916	0.312827	0.00163702	-0.0787874
KGZS4	-0.412128	-0.490952	-0.540539	-0.481375	-0.452409	-0.643375	-0.69096				0.19126	0.101003	-0.109453	-0.0601738	0.42211	0.0739609
KGZS5	-0.246942	-0.245261	-0.271844	-0.233324	-0.185311	-0.299292	-0.380309				-0.00680738	0.108387	-0.141698	-0.205778	0.615077	0.270694
KGZS6	-0.127785	-0.235639	-0.196343	-0.226023	-0.225842	-0.244261	-0.278184				0.844028	-0.166763	0.151161	-0.000801329	0.081559	0.138882
KGZS7	-0.322919	-0.34449	-0.455208	-0.338571	-0.359897	-0.355569	-0.469546				0.0668011	0.321398	-0.256229	0.0629886	-0.0120257	0.32055
KGZS8	-0.352726	-0.550052	-0.457759	-0.324748	-0.290538	-0.330622	-0.314138				0.559432	-0.167791	-0.290569	-0.105344	0.137965	-0.0498597
KGZS9	-0.291694	-0.287596	-0.373293	-0.388654	-0.297612	-0.331174	-0.417921				-0.0140515	0.297978	0.0411508	-0.234249	0.11277	0.261938
KGZS10	-0.311384	-0.37786	-0.340101	-0.413902	-0.427377	-0.473444	-0.533638				0.213486	-0.0999305	0.216999	0.0325553	0.107792	0.127139
KGZS11	-0.325528	-0.547149	-0.468924	-0.546354	-0.624969	-0.569302	-0.693769				0.680807	-0.14297	0.165124	0.143889	-0.0890712	0.218632
KGZS12	-0.822246	-0.873751	-0.91844	-0.913633	-0.834232	-0.853606	-0.864699				0.0626388	0.0511467	-0.00523403	-0.0869073	0.0232243	0.0129948
KGZS13	-0.328554	-0.234382	-0.328025	-0.475363	-0.542866	-0.530555	-0.463903				-0.286625	0.399529	0.449168	0.142003	-0.0226767	-0.125627
KGZS14	-0.223452	-0.307477	-0.241547	-0.368715	-0.28456	-0.30748	-0.288666				0.376027	-0.214423	0.526475	-0.228238	0.0805469	-0.0611898
KGZS15	-0.278662	-0.290864	-0.279855	-0.487234	-0.459022	-0.471927	-0.446731				0.0437894	-0.037848	0.741022	-0.0579024	0.0281146	-0.0533897
KGZS16	-0.296369	-0.242907	-0.188742	-0.273267	-0.426285	-0.331913	-0.351697				-0.180391	-0.222985	0.447832	0.559961	-0.221382	0.0596046
KGZS17	-0.544185	-0.746638	-0.47372	-0.68247	-0.64792	-0.601358	-0.652275				0.372031	-0.36553	0.440662	-0.0506244	-0.0718645	0.0846701
KGZS18	-0.47276	-0.771407	-0.677259	-0.848748	-0.836232	-0.854614	-0.833409				0.631709	-0.122047	0.25321	-0.0147463	0.0219821	-0.024812
KGZS19	-0.203011	-0.498256	-0.543367	-0.477848	-0.421764	-0.398351	-0.461971				1.45433	0.0905377	-0.120579	-0.117368	-0.0555119	0.159707
KGZS20	-0.408761	-0.488238	-0.487631	-0.645539	-0.649406	-0.62846	-0.613896				0.194434	-0.00124247	0.323827	0.00599036	-0.0322547	-0.0231738
KGZS21	-0.550724	-0.820293	-0.810591	-0.775998	-0.750325	-0.747463	-0.795969				0.489481	-0.0118281	-0.0426759	-0.033084	-0.00381354	0.064893
KGZS22	-0.462019	-0.57377	-0.62998	-0.649883	-0.66169	-0.656327	-0.747702				0.241877	0.0979665	0.0315929	0.0181676	-0.00810492	0.139221
KGZS23	-0.44533	-0.774165	-0.685942	-0.760816	-0.732856	-0.779248	-0.729073				0.738408	-0.113959	0.109155	-0.0367504	0.0633028	-0.0643885
KGZS24	-0.220191	-0.0354421	-0.0472245	-0.0452436	-0.0426613	-0.0429947	-0.0534925				-0.839039	0.332443	-0.0419468	-0.0570764	0.00781503	0.244165
KGZS25	-0.273391	-0.593549	-0.443443	-0.583563	-0.525699	-0.635083	-0.54989				1.17106	-0.252896	0.315982	-0.0991556	0.208074	-0.134146
KGZS26	-0.580948	-0.404457	-0.455624	-0.357779	-0.327685	-0.289584	-0.346792				-0.303798	0.126506	-0.214749	-0.0841126	-0.116274	0.197555
KGZS27	-0.492758	-0.640505	-0.714025	-0.706054	-0.68629	-0.642998	-0.633659				0.299837	0.114785	-0.0111641	-0.027992	-0.063081	-0.0145246
KGZS28	-0.278091	-0.649951	-0.262718	-0.592414	-0.561234	-0.508532	-0.541533				1.33718	-0.595788	1.25494	-0.0526313	-0.0939031	0.0648929
KGZS29	-0.383569	-0.585338	-0.505272	-0.711526	-0.732185	-0.738553	-0.713877				0.526028	-0.136785	0.408204	0.0290341	0.00869668	-0.0334109
KGZS30	-0.369613	-0.566312	-0.482674	-0.675561	-0.671777	-0.649949	-0.644681				0.532173	-0.147688	0.399621	-0.00560199	-0.0324918	-0.00810566
KGZS31	-0.415407	-0.525047	-0.579078	-0.498639	-0.451305	-0.440309	-0.566094				0.263932	0.102908	-0.138909	-0.0949269	-0.0243649	0.285673
KGZS32	-0.405348	-0.503446	-0.466562	-0.470501	-0.421943	-0.413209	-0.429456				0.242009	-0.073263	0.00844282	-0.103205	-0.0206992	0.0393191
KGZS33	-0.383813	-0.564971	-0.518128	-0.551305	-0.487667	-0.467137	-0.525255				0.471996	-0.0829113	0.0640312	-0.115432	-0.0420969	0.124413
KGZS34	-0.310375	-0.502263	-0.375384	-0.672642	-0.699313	-0.682084	-0.668644				0.618247	-0.252615	0.791878	0.0396505	-0.0246358	-0.0197049
KGZS35											#DIV/0!	#DIV/0!	#DIV/0!	#DIV/0!	#DIV/0!	#DIV/0!
CAMS1	-0.662729	-0.825291	-0.829811	-0.740666	-0.790272	-0.704196	-0.839148				0.245292	0.00547669	-0.107428	0.0669759	-0.10892	0.19164
CAMS2	-0.544908	-0.633058	-0.708321	-0.689437	-0.656749	-0.695876	-0.730557				0.16177	0.118888	-0.0266611	-0.0474115	0.0595757	0.0498381
CAMS3	-0.518114	-0.670599	-0.65801	-0.688947	-0.598576	-0.682141	-0.673405				0.294307	-0.0187731	0.0470164	-0.131172	0.139606	-0.0128065
CAMS4	-0.899215	-0.964681	-0.973312	-0.97583	-0.982496	-0.981045	-0.980619				0.0728042	0.00894671	0.00258728	0.00683114	-0.00147678	-0.000434753
[truncated: 556 more rows]
