# Supplementary material for: Is China decoupling from the global value chain? A quantitative analysis framework based on the global production network
Source: Research Square preprint supplement (doi:10.21203/rs.3.rs-5355384/v1), 2025-04-10
Supplement: Supplementary file 3 [file d1ec115b53dbca1c6df061da.xlsx]

## Sheet: FISC和GVCFDI
Sector	2007	2008	2009	2010	2011	2012	2013	2014	2015	2016	2017	2018	2019	2020	2021	2022	2023			2008	2009	2010	2011	2012	2013	2014	2015	2016	2017	2018	2019	2020	2021	2022	2023
AUSS1	0.524044	0.441358	0.413439	0.36509	0.199585	-0.00141701	0.0591836	0.275434	0.369807	0.347574	0.234696	0.278556	0.294339	0.314051	0.327101	0.340338	0.277715			-0.157784	-0.0632576	-0.116944	-0.453326	-1.0071	-42.7666	3.6539	0.342633	-0.0601212	-0.32476	0.186881	0.0566607	0.0669704	0.0415537	0.040466	-0.184003
AUSS2	-0.294541	-0.480236	-0.463173	-0.620618	-0.699326	-0.677497	-0.758747	-0.774616	-0.771576	-0.800422	-0.844765	-0.810592	-0.826266	-0.821561	-0.796038	-0.781109	-0.796628			0.630454	-0.0355301	0.339928	0.126821	-0.0312141	0.119926	0.0209148	-0.00392392	0.0373856	0.0553992	-0.040452	0.0193365	-0.00569432	-0.0310667	-0.0187543	0.0198687
AUSS3	0.353083	0.233931	0.214419	0.117075	0.075507	0.0878634	0.0819198	0.0841689	0.0552664	-0.0266057	-0.104279	-0.0910032	-0.066336	-0.0655533	-0.0581331	-0.0488381	-0.0568774			-0.337462	-0.0834063	-0.453989	-0.355057	0.163646	-0.0676454	0.0274542	-0.343387	-1.48141	2.91943	-0.127314	-0.271059	-0.0117992	-0.113193	-0.159892	0.164611
AUSS4	-0.0433012	-0.067389	-0.0597791	-0.0679654	-0.0743286	-0.0792125	-0.0715456	-0.067505	-0.0915846	-0.104697	-0.144685	-0.481768	-0.154973	-0.147543	-0.14143	-0.138925	-0.137874			0.556284	-0.112925	0.136943	0.0936238	0.0657067	-0.0967885	-0.0564755	0.356707	0.143171	0.381943	2.32977	-0.678325	-0.047945	-0.0414327	-0.0177097	-0.00756707
AUSS5	0.00121649	-0.0217877	-0.0234233	-0.0271479	-0.0311063	-0.0368018	-0.0273536	-0.0271546	-0.0450092	-0.0448128	-0.0354202	-0.188329	-0.0388016	-0.0717404	-0.0380806	0.00206338	-0.0170913			-18.9103	0.0750727	0.15901	0.14581	0.1831	-0.256733	-0.00727538	0.657515	-0.00436278	-0.209597	4.317	-0.793969	0.8489	-0.469188	-1.05418	-9.28319
AUSS6	-0.0128816	-0.170019	-0.14972	-0.29069	-0.309406	-0.268579	-0.273575	-0.245587	-0.200564	-0.281862	-0.335578	-0.342874	-0.333721	-0.341228	-0.315571	-0.311746	-0.317561			12.1986	-0.119394	0.94156	0.0643825	-0.131951	0.0185993	-0.102306	-0.183326	0.405345	0.190575	0.0217411	-0.0266956	0.0224958	-0.0751905	-0.0121203	0.0186529
AUSS7	0.210226	0.0205605	0.000389224	-0.1336	-0.171762	-0.157641	-0.176595	-0.155982	-0.0955536	-0.143923	-0.311549	-0.168003	-0.16219	-0.161058	-0.160616	-0.165604	-0.159183			-0.902198	-0.981069	-344.247	0.285647	-0.0822142	0.120239	-0.116725	-0.387407	0.506203	1.16469	-0.460749	-0.034604	-0.00697499	-0.00274351	0.0310548	-0.0387767
AUSS8	-0.194154	-0.334721	-0.313203	-0.407521	-0.387586	-0.245031	-0.315295	-0.221444	-0.272653	-0.395179	-0.488889	-0.449933	-0.421758	-0.383639	-0.314006	-0.330914	-0.318933			0.723993	-0.0642838	0.301137	-0.048916	-0.367803	0.286756	-0.297659	0.231246	0.449386	0.237132	-0.0796812	-0.0626207	-0.0903806	-0.181507	0.0538449	-0.0362046
AUSS9	0.0658491	-0.0722442	-0.0697242	-0.173445	-0.203688	-0.192925	-0.199248	-0.186933	-0.192018	-0.213209	-0.210429	-0.209144	-0.192699	-0.183231	-0.168254	-0.173569	-0.178696			-2.09712	-0.034882	1.48759	0.174363	-0.0528364	0.0327716	-0.0618047	0.0271986	0.110363	-0.013041	-0.00610788	-0.0786275	-0.0491369	-0.081735	0.0315845	0.029539
AUSS10	-0.0501861	-0.176282	-0.159761	-0.264415	-0.280678	-0.253944	-0.26352	-0.230785	-0.199344	-0.263894	-0.297681	-0.314626	-0.30962	-0.307245	-0.290505	-0.286362	-0.288193			2.51257	-0.0937175	0.655066	0.0615027	-0.0952457	0.0377091	-0.124223	-0.136235	0.323812	0.128033	0.0569234	-0.0159109	-0.00767024	-0.0544853	-0.0142586	0.00639272
AUSS11	0.0312663	-0.142198	-0.119315	-0.28551	-0.305395	-0.251462	-0.259107	-0.223351	-0.167915	-0.281649	-0.338658	-0.348265	-0.335963	-0.346272	-0.313288	-0.308881	-0.317109			-5.54795	-0.160923	1.39291	0.0696472	-0.176599	0.0304007	-0.137997	-0.248198	0.677328	0.20241	0.0283681	-0.0353217	0.0306847	-0.0952567	-0.014066	0.0266393
AUSS12	-0.0484801	-0.11116	-0.0227944	-0.24286	-0.275094	-0.221546	-0.29414	-0.202871	-0.174612	-0.269781	-0.341373	-0.344653	-0.341339	-0.342509	-0.38588	-0.294918	-0.306652			1.29291	-0.794942	9.65437	0.132727	-0.194653	0.32767	-0.310292	-0.139295	0.545031	0.265373	0.00960704	-0.00961468	0.0034268	0.126629	-0.235727	0.0397868
AUSS13	-0.0607818	-0.225628	-0.204423	-0.325873	-0.395308	-0.402761	-0.445898	-0.435206	-0.150368	-0.237152	-0.343633	-0.304494	-0.291859	-0.324692	-0.291367	-0.287313	-0.282882			2.71211	-0.0939831	0.594112	0.213073	0.0188528	0.107103	-0.023978	-0.654491	0.57715	0.448998	-0.113899	-0.0414936	0.112496	-0.102636	-0.013912	-0.0154237
AUSS14	-0.0667542	-0.147296	-0.13345	-0.211531	-0.234812	-0.219779	-0.229513	-0.21449	-0.167067	-0.193031	-0.240569	-0.213279	-0.203823	-0.213027	-0.20375	-0.195646	-0.195057			1.20655	-0.0940062	0.585097	0.110063	-0.0640232	0.0442914	-0.0654563	-0.221097	0.15541	0.246273	-0.113442	-0.0443318	0.0451536	-0.0435456	-0.0397789	-0.003009
AUSS15	0.152666	0.0496728	0.0688836	-0.0149322	-0.0688941	-0.0630099	-0.0851955	-0.100087	-0.023811	-0.0489193	-0.0924111	-0.0613275	-0.0605793	-0.0735781	-0.107539	-0.0983319	-0.0896067			-0.674631	0.386747	-1.21677	3.6138	-0.0854092	0.352096	0.174792	-0.762097	1.05448	0.889053	-0.336363	-0.0121992	0.214575	0.461561	-0.0856151	-0.0887328
AUSS16	-0.0624386	-0.121394	-0.102215	-0.154124	-0.171336	-0.166395	-0.0835976	-0.0835597	-0.151978	-0.183401	-0.21404	-0.208426	-0.214908	-0.202525	-0.194035	-0.195248	-0.195513			0.944211	-0.157987	0.507834	0.111681	-0.0288373	-0.497596	-0.000452953	0.818797	0.20676	0.167061	-0.0262329	0.0311007	-0.0576174	-0.0419226	0.00625337	0.00135673
AUSS17	0.193178	-0.0644805	-0.0229219	-0.295497	-0.348551	-0.310093	-0.340069	-0.263069	-0.0846932	-0.294591	-0.555035	-0.475382	-0.446323	-0.448226	-0.359441	-0.376212	-0.374787			-1.33379	-0.644514	11.8915	0.17954	-0.110338	0.0966684	-0.226425	-0.678057	2.47833	0.884087	-0.143511	-0.0611268	0.00426416	-0.198082	0.0466577	-0.00378776
AUSS18	-0.048061	-0.2364	-0.204508	-0.384266	-0.408768	-0.349656	-0.34771	-0.295763	-0.190183	-0.342609	-0.41538	-0.429685	-0.42466	-0.431871	-0.393579	-0.389884	-0.402634			3.91874	-0.134904	0.878975	0.0637627	-0.144609	-0.00556723	-0.149397	-0.356974	0.801468	0.212402	0.0344392	-0.0116947	0.0169802	-0.0886665	-0.00938757	0.0327039
AUSS19	0.0867046	-0.0665307	-0.0529839	-0.148647	-0.173106	-0.159151	-0.168671	-0.154841	-0.113755	-0.165984	-0.206452	-0.256539	-0.193011	-0.198977	-0.184814	-0.180908	-0.182439			-1.76733	-0.203618	1.80552	0.16454	-0.0806107	0.0598154	-0.081992	-0.265343	0.459134	0.243803	0.242611	-0.247637	0.0309135	-0.0711821	-0.0211304	0.00846146
AUSS20	0.201125	-0.0127972	-0.0097318	-0.208009	-0.242428	-0.200913	-0.219806	-0.184481	-0.158157	-0.254686	-0.333921	-0.328257	-0.315915	-0.324893	-0.27155	-0.277013	-0.278503			-1.06363	-0.239534	20.3741	0.16547	-0.171245	0.0940318	-0.160706	-0.142693	0.610332	0.31111	-0.0169623	-0.0375978	0.0284162	-0.164186	0.02012	0.00537907
AUSS21	-0.039929	-0.158387	-0.144122	-0.238517	-0.263679	-0.240436	-0.254647	-0.234843	-0.168054	-0.250306	-0.426313	-0.451569	-0.429395	-0.460995	-0.394182	-0.407889	-0.409509			2.96672	-0.0900689	0.654969	0.105494	-0.0881493	0.059107	-0.0777724	-0.284399	0.489439	0.70317	0.0592414	-0.0491044	0.0735934	-0.144932	0.0347716	0.00397169
AUSS22	0.139378	-0.0102724	-0.0173079	-0.13072	-0.168113	-0.154083	-0.169089	-0.15484	-0.0723266	-0.143691	-0.222014	-0.208598	-0.200817	-0.20702	-0.189521	-0.18278	-0.184515			-1.0737	0.684883	6.55266	0.286049	-0.0834543	0.0973907	-0.0842729	-0.532894	0.986696	0.545083	-0.0604324	-0.0372996	0.0308877	-0.0845276	-0.03557	0.00949681
AUSS23	0.0669443	-0.107796	-0.0996629	-0.241774	-0.267628	-0.236325	-0.250303	-0.229487	-0.165953	-0.259124	-0.322647	-0.420098	-0.302156	-0.302264	-0.278345	-0.279937	-0.277677			-2.61023	-0.075449	1.42592	0.106932	-0.116964	0.0591476	-0.0831632	-0.276853	0.561433	0.245145	0.302036	-0.280749	0.000360107	-0.0791335	0.00571904	-0.00807316
AUSS24	0.0541465	-0.0366255	-0.0375594	-0.0575464	-0.0868086	-0.0854636	-0.073852	-0.0624651	-0.0920575	-0.109956	-0.165291	-0.170836	-0.175545	-0.151987	-0.139741	-0.135679	-0.144463			-1.67642	0.0254972	0.532145	0.508498	-0.0154946	-0.135866	-0.154185	0.473743	0.19443	0.503245	0.0335425	0.0275697	-0.134199	-0.0805784	-0.0290672	0.0647431
AUSS25	0.268091	0.0711594	0.0545687	-0.119755	-0.174078	-0.147698	-0.159817	-0.128322	-0.0961981	-0.137437	-0.185983	-0.177283	-0.175631	-0.169735	-0.0952631	-0.122334	-0.122534			-0.734569	-0.233149	-3.19457	0.453616	-0.151541	0.0820561	-0.197069	-0.250339	0.42869	0.353222	-0.0467779	-0.00931699	-0.0335723	-0.438755	0.284167	0.00163802
AUSS26	0.318602	0.127095	0.103587	-0.0774246	-0.1897	-0.177184	-0.139899	-0.125907	-0.088246	-0.183785	-0.223099	-0.215751	-0.201756	-0.211396	-0.181946	-0.161368	-0.165835			-0.601086	-0.184961	-1.74743	1.45012	-0.0659795	-0.21043	-0.100015	-0.299116	1.08265	0.213913	-0.032936	-0.0648662	0.0477779	-0.139313	-0.113096	0.0276812
AUSS27	0.301919	0.103615	0.0929122	-0.104927	-0.165877	-0.13685	-0.151409	-0.119396	-0.0298722	-0.124155	-0.199421	-0.202152	-0.196892	-0.202711	-0.16951	-0.169937	-0.170649			-0.656811	-0.103296	-2.12931	0.58088	-0.174992	0.106391	-0.211432	-0.749806	3.15622	0.606224	0.0136958	-0.0260202	0.0295525	-0.163783	0.00251625	0.00418719
AUSS28	0.43669	0.280879	0.288509	0.0273324	-0.035944	0.0560385	0.0505702	0.134707	0.196701	-0.00803418	-0.136962	-0.187406	-0.168739	-0.247044	-0.185889	-0.184126	-0.197577			-0.3568	0.0271658	-0.905263	-2.31507	-2.55905	-0.0975818	1.66376	0.46021	-1.04084	16.0474	0.36831	-0.0996093	0.464063	-0.247547	-0.00948357	0.0730517
AUSS29	0.37768	0.167355	0.167036	-0.0456702	-0.0926041	-0.0295921	-0.0391585	0.0212651	0.15029	0.0165912	-0.132035	-0.14077	-0.134329	-0.149455	-0.0897386	-0.0884481	-0.0970709			-0.556887	-0.00190808	-1.27342	1.02767	-0.680446	0.323277	-1.54305	6.06746	-0.889606	-8.95811	0.0661551	-0.0457544	0.112607	-0.399561	-0.0143811	0.0974906
AUSS30	0.499333	0.29341	0.302184	0.0558845	-0.0377543	0.050078	0.00317746	0.075031	0.263392	0.106482	-0.0303931	-0.088211	-0.0746212	-0.100159	0.0074642	-0.000812939	-0.0108027			-0.412397	0.0299052	-0.815065	-1.67558	-2.32642	-0.93655	22.6135	2.51044	-0.595727	-1.28543	1.90234	-0.15406	0.342231	-1.07452	-1.10891	12.2885
AUSS31	0.179124	0.013111	0.00609999	-0.133471	-0.178711	-0.163275	-0.176793	-0.154031	-0.0514761	-0.136806	-0.223365	-0.212072	-0.203335	-0.209207	-0.18981	-0.183082	-0.18425			-0.926805	-0.534741	-22.8806	0.338949	-0.0863716	0.082788	-0.128748	-0.665807	1.65765	0.632721	-0.0505603	-0.0411982	0.0288779	-0.0927141	-0.0354463	0.00637584
AUSS32	0.0807766	-0.0344265	-0.0343092	-0.105102	-0.128134	-0.116987	-0.176461	-0.341713	-0.416119	-0.134905	-0.2097	-0.715082	-0.098626	-0.3888	-0.100952	-0.0909883	-0.107349			-1.42619	-0.00340696	2.06336	0.21915	-0.0869961	0.508379	0.936478	0.217743	-0.675802	0.554425	2.41003	-0.862077	2.94217	-0.740349	-0.0987004	0.179808
AUSS33	0.00210312	-0.0334659	-0.016773	-0.0920982	-0.122311	-0.119655	-0.131807	-0.116303	-0.0909426	-0.150397	-0.232807	-0.209163	-0.189975	-0.195249	-0.185223	-0.17859	-0.181084			-16.9125	-0.498804	4.49086	0.328047	-0.0217121	0.10156	-0.117629	-0.218054	0.653752	0.547953	-0.101561	-0.0917336	0.0277565	-0.0513474	-0.0358106	0.0139629
AUSS34	0.285983	0.0914404	0.0820292	-0.110388	-0.196709	-0.158847	-0.155458	-0.122246	-0.0226757	-0.124893	-0.221587	-0.211964	-0.203104	-0.213933	-0.183827	-0.17828	-0.180249			-0.680259	-0.102921	-2.34571	0.781976	-0.192477	-0.0213318	-0.213642	-0.814507	4.50777	0.774216	-0.0434263	-0.0417987	0.0533176	-0.140725	-0.0301759	0.0110422
AUSS35	0.00724581	-0.0282212	-0.055692	-0.0673845	-0.0866031	-0.0870264	-0.0927018	-0.0896281	-0.0666926	-0.0676015	-0.0727931	-0.0656552	-0.0663904	-0.0550664	-0.0513866	-0.0533275	-0.065766			-4.89482	0.973412	0.20995	0.285209	0.00488686	0.0652157	-0.0331576	-0.255897	0.0136296	0.0767959	-0.0980566	0.0111971	-0.170567	-0.0668237	0.0377696	0.233247
AUTS1	0.371498	0.395648	0.421021	0.387576	0.401433	0.372739	0.386794	0.381354	0.369089	0.272541	0.400765	0.292341	0.176964	0.320412	0.331865	0.22003	0.288552			0.065007	0.0641304	-0.0794395	0.0357539	-0.0714794	0.0377079	-0.0140629	-0.0321632	-0.261585	0.470478	-0.270542	-0.394666	0.810602	0.0357446	-0.336988	0.311421
AUTS2	-0.412032	-0.374115	-0.143878	-0.236638	-0.475512	-0.275218	-0.270408	-0.122036	-0.152699	-0.223257	-0.170224	-0.0706513	-0.0945911	-0.139937	-0.145767	-0.172299	-0.166091			-0.0920237	-0.615417	0.644707	1.00945	-0.421216	-0.0174772	-0.548697	0.251257	0.462078	-0.237541	-0.584952	0.338845	0.479388	0.0416656	0.182015	-0.0360353
AUTS3	0.239748	0.250045	0.316403	0.251069	0.237811	0.225666	0.250492	0.248762	0.258302	0.128066	0.218292	0.14027	-0.0111371	0.160849	0.105088	0.136469	0.136842			0.0429488	0.265386	-0.206492	-0.052804	-0.0510721	0.110013	-0.00690678	0.0383527	-0.504203	0.704537	-0.357421	-1.0794	-15.4426	-0.346665	0.298621	0.00273214
AUTS4	-0.300881	-0.290331	-0.300156	-0.30287	-0.314221	-0.334555	-0.348202	-0.279162	-0.402928	-0.458661	-0.322243	-0.178456	-0.110322	-0.12942	-0.115706	-0.110044	-0.152102			-0.0350651	0.0338415	0.00904223	0.0374793	0.0647116	0.0407922	-0.198275	0.443348	0.138319	-0.297428	-0.446206	-0.381795	0.173104	-0.105964	-0.0489309	0.382185
AUTS5	-0.0982689	-0.0920371	-0.0931776	-0.0787277	-0.090152	-0.0878868	-0.0857086	-0.0830315	-0.147009	-0.404649	-0.0916413	-0.108687	-0.0797215	-0.0803943	-0.0761247	-0.0650435	-0.0634846			-0.0634156	0.0123922	-0.15508	0.145113	-0.0251265	-0.0247849	-0.031234	0.770525	1.75254	-0.773529	0.186004	-0.266504	0.00843932	-0.0531088	-0.145566	-0.0239664
AUTS6	-0.140835	0.107639	0.257885	0.0832957	0.129592	0.172297	0.193628	0.181845	0.210632	0.0824237	-0.150226	0.108632	0.0208269	0.170726	0.0720084	-0.00173059	0.100786			-1.76429	1.39584	-0.677005	0.555806	0.329535	0.123801	-0.0608518	0.158304	-0.608683	-2.82261	-1.72313	-0.808281	7.19737	-0.578221	-1.02403	-59.2379
AUTS7	-0.136946	-0.13905	-0.104055	-0.243814	-0.289947	-0.254946	-0.207829	-0.308964	-0.251733	-0.258413	-0.470102	-0.00556306	-0.127386	0.0857176	-0.0155555	0.0128682	-0.0579128			0.0153621	-0.251666	1.34311	0.189216	-0.120715	-0.184811	0.486624	-0.185234	0.026534	0.81919	-0.988166	21.8985	-1.6729	-1.18147	-1.82724	-5.50045
AUTS8	-0.142546	-0.170284	-0.0210338	-0.0546029	-0.204745	-0.313738	-0.292833	-0.270841	-0.222153	-0.357284	-0.29461	-0.130368	-0.0789643	-0.0598923	-0.0911244	-0.0763977	-0.0754713			0.194592	-0.876478	1.59596	2.74971	0.532338	-0.0666345	-0.0750989	-0.179765	0.608275	-0.175416	-0.557491	-0.394296	-0.241527	0.52147	-0.16161	-0.012126
AUTS9	-0.551272	-0.529654	-0.538509	-0.624842	-0.614654	-0.619727	-0.606632	-0.619552	-0.591529	-0.574277	-0.61013	-0.652354	-0.71114	-0.766003	-0.757225	-0.718913	-0.593992			-0.0392142	0.0167193	0.160318	-0.0163041	0.00825199	-0.0211298	0.021298	-0.0452309	-0.0291658	0.0624324	0.0692044	0.0901146	0.0771473	-0.0114592	-0.0505949	-0.173764
AUTS10	-0.234427	-0.189735	0.0487311	-0.226026	-0.244137	-0.221589	-0.249082	-0.244654	-0.240923	-0.254899	-0.341071	-0.386248	-0.213792	-0.390211	-0.403824	-0.364733	-0.344971			-0.190644	-1.25684	-5.63823	0.0801303	-0.0923607	0.124072	-0.0177777	-0.0152472	0.0580082	0.338064	0.132455	-0.446489	0.825189	0.034886	-0.0968031	-0.0541813
AUTS11	0.0693703	0.279242	0.367706	0.304901	0.2877	0.271237	0.283019	0.282023	-0.0312415	0.144802	-0.227725	-0.328749	0.0755705	0.228903	0.162442	0.143898	0.165932			3.02538	0.316801	-0.170803	-0.0564142	-0.0572246	0.0434401	-0.00351949	-1.11078	-5.63493	-2.57266	0.443622	-1.22987	2.029	-0.290345	-0.114156	0.153121
AUTS12	-0.689139	-0.681266	-0.5624	-0.665658	-0.669897	-0.63984	-0.607288	-0.615621	-0.57693	-0.633533	-0.676061	-0.653515	-0.59941	-0.615078	-0.683359	-0.697333	-0.645533			-0.0114243	-0.174478	0.183602	0.0063675	-0.0448684	-0.0508743	0.0137206	-0.0628483	0.0981107	0.0671279	-0.0333483	-0.0827909	0.0261392	0.111012	0.020449	-0.0742829
AUTS13	-0.614373	-0.613111	-0.590369	-0.589062	-0.58399	-0.591486	-0.591394	-0.608526	-0.576605	-0.574751	-0.617573	-0.583275	-0.544125	-0.567213	-0.573405	-0.581607	-0.477714			-0.00205456	-0.0370926	-0.00221309	-0.0086104	0.0128358	-0.000155469	0.0289681	-0.0524565	-0.00321534	0.0745061	-0.0555373	-0.0671205	0.0424307	0.0109167	0.014305	-0.178632
AUTS14	-0.625014	-0.577366	-0.506204	-0.546707	-0.552173	-0.512432	-0.483659	-0.512099	-0.58603	-0.516154	-0.571202	-0.555252	-0.531282	-0.712569	-0.780315	-0.658136	-0.622357			-0.0762353	-0.123252	0.0800121	0.00999789	-0.0719723	-0.0561494	0.0588026	0.144368	-0.119236	0.10665	-0.0279221	-0.0431711	0.341227	0.0950726	-0.156577	-0.0543641
AUTS15	-0.74027	-0.704914	-0.695746	-0.748077	-0.74322	-0.747741	-0.750011	-0.767963	-0.733389	-0.744488	-0.779671	-0.753911	-0.757679	-0.780676	-0.791941	-0.785357	-0.696063			-0.0477609	-0.0130065	0.0752166	-0.00649299	0.00608253	0.00303647	0.0239362	-0.0450212	0.0151334	0.0472588	-0.0330391	0.00499755	0.0303513	0.0144302	-0.00831414	-0.113698
AUTS16	-0.142006	-0.119446	-0.188036	-0.223779	-0.281177	-0.202946	-0.206165	-0.210046	-0.183219	-0.223943	-0.215367	-0.214928	-0.175457	-0.195314	-0.209577	-0.217767	-0.207248			-0.158868	0.574233	0.190086	0.256494	-0.278227	0.0158611	0.0188259	-0.127721	0.222272	-0.0382938	-0.00203829	-0.18365	0.113176	0.0730261	0.0390767	-0.0483026
AUTS17	-0.287007	-0.310862	-0.177754	-0.249679	-0.289008	-0.291395	-0.232292	-0.231993	-0.166299	-0.379093	-0.335914	-0.331733	-0.261989	-0.273477	-0.341976	-0.34374	-0.290948			0.0831165	-0.42819	0.404633	0.157519	0.00825939	-0.202831	-0.00128344	-0.283175	1.27959	-0.113901	-0.0124454	-0.210242	0.0438484	0.250476	0.00515793	-0.15358
AUTS18	0.306895	0.309228	0.40715	0.365557	0.342489	0.332401	0.355175	0.353719	0.372045	0.222944	0.28059	0.25398	0.110325	0.310903	0.239616	0.268935	0.26083			0.00760338	0.316665	-0.102156	-0.0631044	-0.0294541	0.0685134	-0.00410057	0.0518098	-0.40076	0.25857	-0.0948377	-0.565613	1.81805	-0.229288	0.122357	-0.0301364
AUTS19	-0.445657	-0.373916	-0.193036	-0.279869	-0.298753	-0.322072	-0.349382	-0.370458	-0.405067	-0.475166	-0.488914	-0.468888	-0.498658	-0.467088	-0.465111	-0.441955	-0.287051			-0.160978	-0.483744	0.449828	0.0674741	0.0780517	0.0847968	0.0603226	0.0934227	0.173055	0.0289319	-0.0409591	0.063491	-0.0633113	-0.00423258	-0.0497841	-0.350498
AUTS20	-0.0657343	-0.0619117	0.112588	0.025106	-0.0637116	-0.0348271	-0.0456375	-0.0669533	0.0287498	-0.169687	-0.186946	-0.123587	-0.1294	-0.061046	-0.238843	-0.124238	-0.124921			-0.0581527	-2.81852	-0.77701	-3.5377	-0.453364	0.310403	0.467067	-1.4294	-6.90219	0.101712	-0.338915	0.0470317	-0.528236	2.91251	-0.479834	0.00549534
AUTS21	0.000537536	0.0155443	0.0869734	0.0434258	0.0292004	0.00457697	0.0227758	0.0156795	0.0197906	-0.0684268	-0.0386438	-0.0473841	-0.129003	-0.00383503	-0.0639538	-0.046149	-0.0617037			27.9176	4.59521	-0.5007	-0.32758	-0.843256	3.97617	-0.311574	0.262201	-4.45753	-0.435253	0.226177	1.72249	-0.970272	15.6762	-0.278402	0.337054
AUTS22	0.058332	0.0719902	0.182738	0.134638	0.111368	0.109829	0.135819	0.131539	0.153271	-0.00212026	0.000485013	0.0135708	-0.125029	0.0675326	-0.0318772	0.0259582	0.0169857			0.234146	1.53837	-0.26322	-0.17283	-0.0138163	0.236638	-0.0315119	0.165211	-1.01383	-1.22875	26.9802	-10.2131	-1.54014	-1.47203	-1.81432	-0.345653
AUTS23	-0.0437178	-0.0380885	0.0736337	0.00585403	-0.0618841	-0.0480131	-0.0553939	-0.0683034	-0.0143672	-0.148408	-0.155121	-0.238382	-0.113649	-0.0794624	-0.17155	-0.112584	-0.1092			-0.128764	-2.93322	-0.920498	-11.5712	-0.224145	0.153725	0.23305	-0.789657	9.32969	0.0452325	0.536748	-0.523248	-0.300811	1.15888	-0.343726	-0.0300596
AUTS24	-0.0784668	-0.0736554	-0.0725571	-0.0754316	-0.0817559	-0.0765106	-0.077652	-0.0818491	-0.0799715	-0.0838826	-0.0957029	-0.0871311	-0.0812854	-0.0438146	-0.0434562	-0.0471916	-0.0500865			-0.061318	-0.0149108	0.0396168	0.0838414	-0.0641585	0.0149188	0.0540498	-0.0229403	0.0489072	0.140915	-0.089567	-0.0670905	-0.460979	-0.00817972	0.0859589	0.0613426
AUTS25	-7.04488e-05	0.00905647	0.072951	0.0409058	0.0157379	0.000895875	0.0182486	0.00518842	-0.0160716	-0.077269	-0.058071	-0.0547078	-0.122399	-0.0396051	-0.0711555	-0.061439	-0.0636631			-129.554	7.05512	-0.43927	-0.615264	-0.943075	19.3696	-0.715681	-4.09759	3.8078	-0.248457	-0.0579158	1.23732	-0.676426	0.796627	-0.136554	0.0361995
AUTS26	0.0546972	0.0597726	0.144318	0.104836	0.0484625	0.0564557	0.0629801	0.051498	0.0329837	-0.0702748	-0.0461686	-0.0599032	0.0529897	0.0461856	-0.0706948	-0.0461575	-0.0373745			0.092791	1.41445	-0.273575	-0.537732	0.164936	0.115567	-0.182313	-0.359515	-3.13059	-0.343028	0.297488	-1.88459	-0.128403	-2.53067	-0.347088	-0.190284
AUTS27	0.0504581	0.0550899	0.145147	0.0961819	0.0749546	0.0504191	0.0683856	0.0588798	0.0636108	-0.0523575	-0.0265311	-0.032828	-0.133388	0.0224897	-0.049449	-0.0363558	-0.0420591			0.0917955	1.63473	-0.337348	-0.2207	-0.327337	0.356342	-0.139002	0.0803496	-1.82309	-0.49327	0.23734	3.06323	-1.1686	-3.19874	-0.264781	0.156875
AUTS28	0.198608	0.185689	0.308901	0.279128	0.249023	0.241414	0.27751	0.287395	0.315455	0.1599	0.200273	0.138427	-0.0349176	0.218373	0.132163	0.145614	0.130628			-0.0650447	0.663535	-0.096384	-0.107854	-0.0305557	0.149521	0.0356202	0.0976357	-0.493115	0.25249	-0.308806	-1.25225	-7.25396	-0.394786	0.101777	-0.102917
AUTS29	0.249524	0.246378	0.365949	0.32163	0.29993	0.290601	0.322028	0.326759	0.359885	0.210994	0.284551	0.22491	0.0670178	0.318185	0.225025	0.2425	0.211058			-0.0126077	0.485316	-0.121106	-0.0674701	-0.0311055	0.108148	0.0146891	0.101378	-0.413718	0.348621	-0.209596	-0.702024	3.74776	-0.292785	0.0776571	-0.129656
AUTS30	0.315654	0.319713	0.447564	0.383527	0.351075	0.341782	0.380606	0.376747	0.409689	0.18948	0.196151	0.183643	-0.0877042	0.281015	0.164063	0.155956	0.135582			0.0128581	0.399892	-0.14308	-0.0846135	-0.026471	0.113592	-0.0101379	0.0874388	-0.537502	0.0352026	-0.0637651	-1.47758	-4.20412	-0.416175	-0.0494154	-0.130643
AUTS31	-0.0499642	-0.0423255	0.0130503	-0.00760656	-0.0221382	-0.0370521	-0.02456	-0.0295435	-0.0380974	-0.0793589	-0.0580438	-0.0555204	-0.10377	-0.0377967	-0.0732555	-0.0625671	-0.0670597			-0.152883	-1.30833	-1.58286	1.91041	0.673672	-0.337149	0.20291	0.289536	1.08305	-0.268591	-0.0434742	0.869037	-0.635763	0.938143	-0.145906	0.0718041
AUTS32	-0.0500511	-0.0417938	0.0155043	-0.00826295	-0.0263232	-0.0416807	-0.0284964	-0.0324642	-0.0407351	-0.0797277	-0.0568773	-0.0553038	-0.104575	-0.0377744	-0.0728877	-0.0626176	-0.0668783			-0.164978	-1.37097	-1.53295	2.18569	0.583419	-0.316316	0.139239	0.254771	0.957224	-0.286605	-0.0276654	0.89092	-0.638782	0.929555	-0.140904	0.0680426
AUTS33	-0.032434	-0.0725736	-0.108307	-0.0833214	-0.0450918	-0.103993	-0.0510685	-0.0527159	-0.105066	-0.0650594	-0.0557612	-0.0431863	-0.0618563	-0.0426135	-0.050346	-0.0454907	-0.128202			1.23758	0.492379	-0.230695	-0.458821	1.30625	-0.508924	0.0322593	0.993067	-0.380778	-0.142918	-0.225513	0.432311	-0.311088	0.181456	-0.0964382	1.8182
AUTS34	-0.146276	-0.175419	0.0516322	-0.00994399	-0.073004	-0.0739533	0.000441801	-0.0016013	0.0510765	-0.106853	-0.204434	-0.186093	-0.0628778	0.0157546	-0.14189	-0.165143	-0.168415			0.199234	-1.29434	-1.19259	6.34152	0.0130026	-1.00597	-4.62447	-32.897	-3.09202	0.913225	-0.0897174	-0.662115	-1.25056	-10.0062	0.163885	0.0198094
AUTS35		-0.0292102		-0.0285815		-0.0285714	-0.0298043	-0.0286587	-0.029241	-0.0294381	-0.0290251	-0.0316034	-0.031655	-0.031417	-0.031643	-0.0295563	-0.0291776			#DIV/0!	-1	#DIV/0!	-1	#DIV/0!	0.0431498	-0.0384375	0.0203193	0.00674167	-0.0140299	0.0888304	0.00163299	-0.00751923	0.00719413	-0.0659464	-0.0128131
BELS1	0.262372	0.247863	0.333538	0.289448	0.275683	0.281946	0.265003	0.223905	0.201425	0.191241	0.18817	-0.314185	-0.353011	-0.342537	-0.315882	-0.33487	-0.334872			-0.0552978	0.345653	-0.132187	-0.0475556	0.022717	-0.0600949	-0.155084	-0.100399	-0.0505604	-0.0160565	-2.66968	0.12358	-0.0296719	-0.0778177	0.0601115	7.33391e-06
BELS2	-0.217514	-0.280851	-0.19737	-0.177878	-0.197027	-0.160447	-0.217459	-0.208333	-0.132229	-0.116504	-0.11247	-0.20158	-0.227442	-0.243116	-0.229315	-0.252092	-0.154412			0.291189	-0.297244	-0.0987568	0.107655	-0.185662	0.35533	-0.0419643	-0.365302	-0.11892	-0.0346277	0.792307	0.128295	0.0689166	-0.0567684	0.0993284	-0.38748
BELS3	0.212706	0.225001	0.283195	0.229239	0.22076	0.206502	0.191276	0.172753	0.149134	0.129041	0.115073	-0.100919	-0.0247522	0.0485067	-0.0219075	-0.148473	-0.167549			0.0578005	0.258643	-0.190528	-0.0369879	-0.0645853	-0.0737342	-0.0968402	-0.136717	-0.134729	-0.108244	-1.877	-0.754732	-2.9597	-1.45164	5.77727	0.128479
BELS4	-0.369263	-0.322089	-0.338661	-0.312668	-0.289473	-0.312102	-0.300692	-0.236619	-0.285078	-0.238957	-0.195094	-0.156453	-0.138599	-0.14412	-0.137334	-0.157336	-0.207026			-0.127751	0.0514512	-0.0767521	-0.0741845	0.0781724	-0.0365569	-0.213084	0.204796	-0.161784	-0.18356	-0.198063	-0.114115	0.0398313	-0.0470858	0.145644	0.315819
BELS5	-0.04777	-0.0420386	-0.0432164	-0.0370511	-0.0466888	-0.0406534	-0.0390469	-0.0405027	-0.0396414	-0.0502552	-0.0389264	-0.0312076	-0.0371617	-0.0303536	-0.0531199	-0.0526394	-0.0491838			-0.119979	0.0280176	-0.142662	0.260122	-0.129269	-0.0395185	0.0372833	-0.0212648	0.267746	-0.225425	-0.198294	0.190793	-0.183202	0.750035	-0.0090454	-0.0656463
BELS6	-0.0332985	-0.0243244	0.102392	0.0195806	0.00511796	-0.0183195	-0.0366004	-0.0499173	-0.06368	-0.0821891	-0.0672785	-0.288863	-0.145101	-0.20352	-0.146773	-0.19838	-0.142027			-0.269503	-5.20942	-0.808768	-0.738621	-4.57945	0.997894	0.363849	0.275708	0.290658	-0.181417	3.29354	-0.497682	0.40261	-0.278828	0.351609	-0.284065
BELS7	0.1365	0.111983	0.120441	0.0829647	0.0616262	0.00782643	-0.0303562	-0.0410341	-0.0584541	-0.0753553	-0.0749704	-0.199961	-0.180829	-0.172618	-0.179698	-0.232013	-0.181582			-0.179616	0.0755373	-0.311161	-0.257199	-0.873002	-4.87868	0.351753	0.424526	0.289136	-0.00510784	1.66721	-0.0956799	-0.0454061	0.0410133	0.291125	-0.21736
BELS8	-0.285874	-0.411467	-0.502572	-0.561783	-0.611433	-0.652025	-0.643208	-0.609199	-0.600082	-0.564586	-0.597165	-0.633417	-0.492554	-0.48186	-0.528279	-0.5012	-0.616602			0.439329	0.221414	0.117816	0.08838	0.0663872	-0.0135223	-0.0528741	-0.0149649	-0.0591516	0.0577042	0.0607067	-0.222386	-0.021712	0.0963331	-0.0512583	0.23025
BELS9	-0.709785	-0.678455	-0.652065	-0.650923	-0.661289	-0.674248	-0.675617	-0.675869	-0.669106	-0.651904	-0.667154	-0.718711	-0.663	-0.700767	-0.673142	-0.712736	-0.737437			-0.0441399	-0.0388982	-0.00175116	0.0159248	0.0195964	0.00203121	0.000372635	-0.0100055	-0.0257098	0.0233936	0.0772788	-0.077516	0.0569641	-0.0394207	0.0588196	0.0346564
BELS10	-0.295573	-0.250483	-0.238234	-0.26704	-0.280033	-0.284137	-0.261188	-0.249838	-0.245182	-0.228512	-0.229516	-0.39507	-0.402253	-0.348186	-0.28693	-0.335345	-0.3332			-0.15255	-0.0489013	0.120914	0.0486549	0.0146581	-0.0807696	-0.0434557	-0.0186333	-0.0679917	0.00439395	0.721317	0.0181813	-0.134409	-0.175928	0.168732	-0.00639405
BELS11	-0.0606319	-0.0235101	0.198902	0.158207	0.159953	0.135939	0.0997354	0.0906091	0.0696689	0.0320354	0.0521728	-0.37767	-0.0962556	-0.191726	-0.0963045	-0.17156	-0.0807024			-0.61225	-9.46031	-0.204599	0.011038	-0.150133	-0.266323	-0.091505	-0.231105	-0.540177	0.628599	-8.23883	-0.745133	0.991841	-0.497697	0.781435	-0.529597
BELS12	-0.744871	-0.724129	-0.628213	-0.680608	-0.683733	-0.641524	-0.626423	-0.630055	-0.625834	-0.623429	-0.660968	-0.669966	-0.634904	-0.645443	-0.672327	-0.708606	-0.688069			-0.0278466	-0.132458	0.0834032	0.00459202	-0.061734	-0.0235388	0.00579804	-0.00669995	-0.00384231	0.0602142	0.0136134	-0.0523349	0.0166007	0.0416509	0.0539602	-0.0289818
BELS13	-0.315302	-0.308675	-0.0350229	-0.0221305	-0.0310474	-0.0536844	-0.0727674	-0.081273	-0.0976351	-0.110969	-0.107676	-0.19536	-0.172875	-0.160277	-0.163846	-0.214115	-0.39284			-0.0210166	-0.886538	-0.368114	0.402924	0.729111	0.355467	0.116887	0.201323	0.13657	-0.0296808	0.814339	-0.115095	-0.0728752	0.0222668	0.306812	0.834713
BELS14	-0.411309	-0.352969	-0.316715	-0.328974	-0.318952	-0.299897	-0.259817	-0.251785	-0.249456	-0.250034	-0.245457	-0.282128	-0.247318	-0.293905	-0.311842	-0.294433	-0.239553			-0.14184	-0.102713	0.0387095	-0.0304645	-0.059743	-0.133646	-0.0309148	-0.00924967	0.00231586	-0.018305	0.149399	-0.123384	0.18837	0.0610303	-0.0558261	-0.186392
BELS15	-0.483523	-0.425637	-0.418779	-0.454402	-0.462491	-0.426739	-0.431715	-0.401189	-0.390537	-0.362877	-0.369678	-0.356001	-0.31579	-0.345068	-0.35409	-0.422553	-0.38225			-0.119718	-0.016113	0.0850643	0.0178012	-0.0773033	0.0116617	-0.0707081	-0.0265517	-0.0708265	0.0187431	-0.0369978	-0.112951	0.0927146	0.0261449	0.193348	-0.0953779
BELS16	-0.193559	-0.167427	-0.177503	-0.214554	-0.230759	-0.23118	-0.213516	-0.194267	-0.202766	-0.190336	-0.159186	-0.310832	-0.435042	-0.443864	-0.388109	-0.207411	-0.175167			-0.135009	0.0601819	0.208731	0.0755321	0.00182543	-0.0764101	-0.0901526	0.0437506	-0.061304	-0.163659	0.952637	0.399607	0.0202778	-0.125612	-0.465585	-0.155463
BELS17	-0.578383	-0.576568	-0.507169	-0.459818	-0.390839	-0.45923	-0.423908	-0.462162	-0.470853	-0.499944	-0.509403	-0.712214	-0.503895	-0.418516	-0.529123	-0.521204	-0.521462			-0.00313775	-0.120367	-0.0933634	-0.150012	0.174985	-0.0769159	0.0902416	0.0188032	0.0617843	0.0189196	0.398135	-0.292494	-0.169438	0.264285	-0.0149666	0.000494372
BELS18	0.0184366	0.0487683	0.293165	0.18789	0.177232	0.155647	0.125077	0.11114	0.0918803	0.0237441	0.0637587	-0.507939	-0.0750911	-0.237278	-0.142198	-0.254057	-0.147084			1.64518	5.01137	-0.359098	-0.0567219	-0.121792	-0.196402	-0.111433	-0.17329	-0.741576	1.68525	-8.96658	-0.852165	2.15986	-0.400709	0.786638	-0.421058
BELS19	0.087002	0.0874786	0.0790106	-0.0169121	-0.0172665	-0.0509929	-0.07414	-0.0816936	-0.0979038	-0.110669	-0.106757	-0.457525	-0.165797	-0.173397	-0.198899	-0.277497	-0.202702			0.00547741	-0.096801	-1.21405	0.0209555	1.95329	0.453927	0.101883	0.198426	0.130387	-0.0353489	3.28566	-0.637623	0.0458428	0.147071	0.395167	-0.269536
BELS20	-0.111421	-0.0871592	0.152867	0.0994893	0.030143	0.118709	0.075007	0.0775902	0.0246743	0.0140817	0.0841664	-0.219948	0.0277695	-0.0847413	-0.00915806	-0.138138	-0.0364015			-0.217749	-2.75389	-0.349179	-0.697023	2.93821	-0.368146	0.0344391	-0.681992	-0.429295	4.97699	-3.61326	-1.12625	-4.0516	-0.891929	14.0838	-0.736485
BELS21	-0.221508	-0.186448	0.0248203	0.033317	-0.0391217	0.0778949	0.0474197	0.0658053	0.0116357	0.00956291	0.0968012	-0.237571	-0.00575337	-0.131641	-0.0768307	-0.121285	-0.0451495			-0.158277	-1.13312	0.34233	-2.17423	-2.99109	-0.391235	0.387721	-0.82318	-0.178141	9.12257	-3.45422	-0.975783	21.8806	-0.416361	0.578598	-0.62774
BELS22	0.193283	0.217998	0.226449	0.0928892	0.073756	0.0326684	0.00111084	-0.00367237	-0.0308483	-0.0553216	-0.0527556	-0.223519	-0.174998	-0.1915	-0.22133	-0.337998	-0.215614			0.127872	0.0387639	-0.5898	-0.205979	-0.557075	-0.965996	-4.30593	7.40011	0.793347	-0.0463835	3.23687	-0.217076	0.0942977	0.155771	0.527121	-0.362084
BELS23	0.0272705	0.0590976	0.184149	0.116366	0.0556215	0.109245	0.0475017	0.0465434	-0.00102869	0.00138675	0.0800865	-0.284353	0.0896027	0.0139951	0.0128511	-0.0792313	-0.0263808			1.16709	2.11602	-0.368088	-0.522013	0.964083	-0.565183	-0.020173	-1.0221	-2.34808	56.751	-4.55058	-1.31511	-0.84381	-0.0817397	-7.16533	-0.66704
BELS24	-0.111915	-0.237616	-0.208372	-0.393724	-0.391118	-0.383555	-0.235779	-0.217702	-0.22549	-0.216767	-0.21539	-0.284728	-0.330857	-0.256009	-0.295066	-0.33949	-0.131288			1.12318	-0.123074	0.889523	-0.00661831	-0.0193349	-0.38528	-0.0766697	0.0357705	-0.0386822	-0.00635204	0.321919	0.162009	-0.226225	0.15256	0.150558	-0.613278
BELS25	0.103083	0.115389	0.144356	-0.0612605	-0.0733685	-0.0868591	-0.093834	-0.102666	-0.112052	-0.113019	-0.130386	-0.12085	-0.135755	-0.0995413	-0.11929	-0.114552	-0.114267			0.119373	0.251041	-1.42437	0.197647	0.183875	0.0803006	0.0941235	0.0914242	0.00862907	0.153665	-0.0731403	0.123335	-0.266756	0.198394	-0.0397189	-0.00248353
BELS26	0.0727912	0.102943	0.240167	0.232747	0.178484	0.230775	0.183088	0.147799	-0.0118874	-0.107221	0.00338686	-0.679084	0.17197	0.0384851	-0.0112046	0.0392832	0.107031			0.414218	1.33302	-0.0308962	-0.233139	0.29297	-0.206639	-0.192741	-1.08043	8.01966	-1.03159	-201.506	-1.25324	-0.776211	-1.29114	-4.50598	1.7246
BELS27	0.161445	0.17327	0.241878	0.126864	0.0953568	0.0636132	0.0263984	0.012791	-0.015451	-0.0338061	-0.0346417	-0.2238	-0.177766	-0.180881	-0.211867	-0.306653	-0.212904			0.0732469	0.395957	-0.475505	-0.248352	-0.332892	-0.585017	-0.515463	-2.20796	1.18796	0.0247181	5.46042	-0.205694	0.0175266	0.171303	0.447387	-0.305718
BELS28	0.264045	0.286772	0.391162	0.334917	0.317925	0.280804	0.246095	0.24759	0.218497	0.189432	0.183027	-0.122014	-0.0180603	-0.065848	-0.135663	-0.349642	-0.108651			0.0860708	0.364018	-0.14379	-0.0507348	-0.116762	-0.123603	0.00607359	-0.117503	-0.133024	-0.0338097	-1.66665	-0.851982	2.64602	1.06025	1.57728	-0.689252
BELS29	0.167438	0.194452	0.282348	0.228039	0.213939	0.187379	0.1531	0.149522	0.120408	0.0879189	0.0872847	-0.16971	-0.0882553	-0.109321	-0.18406	-0.351918	-0.162652			0.161337	0.452024	-0.19235	-0.0618282	-0.124149	-0.182938	-0.0233742	-0.194713	-0.269825	-0.00721288	-2.94432	-0.479963	0.238687	0.683671	0.911975	-0.537812
BELS30	0.416372	0.445982	0.510359	0.424831	0.413853	0.375092	0.340216	0.331674	0.302946	0.273621	0.246393	-0.120874	-0.0125853	-0.0625681	-0.118607	-0.417157	-0.0698101			0.0711132	0.144349	-0.167584	-0.0258401	-0.0936596	-0.0929789	-0.025109	-0.0866138	-0.0968007	-0.0995101	-1.49057	-0.895881	3.97154	0.895647	2.51714	-0.832653
BELS31	0.0109573	0.0131881	0.0145712	-0.0472768	-0.0536884	-0.0724682	-0.185768	-0.327352	-0.303862	-0.342679	-0.217172	-0.177716	-0.170534	-0.454026	-0.266866	-0.20623	-0.177312			0.203589	0.104875	-4.24454	0.13562	0.349791	1.56344	0.762153	-0.0717567	0.127747	-0.366252	-0.181681	-0.0404153	1.66238	-0.412223	-0.227217	-0.14022
BELS32	-0.0842627	0.00316048	0.0165682	-0.0444818	-0.0525825	-0.0710614	-0.0858108	-0.0926999	-0.105191	-0.11529	-0.10639	-0.196514	-0.181447	-0.174211	-0.180149	-0.231677	-0.191227			-1.03751	4.24231	-3.68477	0.182113	0.351427	0.207558	0.0802822	0.134744	0.0960109	-0.077194	0.847102	-0.0766698	-0.0398818	0.0340863	0.28603	-0.174596
BELS33	-0.0205547	-0.0195881	-0.0329786	-0.0664141	-0.0718978	-0.0794719	-0.0826505	-0.0871565	-0.0932677	-0.0896829	-0.0852109	-0.0976596	-0.104133	-0.0864111	-0.0868232	-0.102553	-0.0990771			-0.047028	0.683606	1.01386	0.0825672	0.105346	0.039997	0.0545181	0.0701186	-0.0384358	-0.0498649	0.146094	0.0662846	-0.170186	0.00476975	0.181173	-0.0338961
BELS34	0.186864	0.214657	0.187282	-0.0371706	-0.159135	-0.0498972	0.0829559	0.0719045	0.0419189	0.017696	0.0209893	-0.208604	-0.141181	-0.16303	-0.199723	-0.328388	-0.190997			0.148736	-0.127527	-1.19847	3.2812	-0.686446	-2.66253	-0.13322	-0.41702	-0.57785	0.1861	-10.9386	-0.323211	0.154756	0.225067	0.644219	-0.41838
BELS35	-0.0290442	-0.029069	-0.0288049	-0.0290628	-0.0292835	-0.0294642	-0.0305	-0.0330826	-0.0307749	-0.0330494	-0.0295957	-0.0342477	-0.0360147	-0.0305584	-0.0303203	-0.0298179	-0.0293489			0.00085411	-0.00908545	0.00895154	0.00759375	0.0061722	0.0351558	0.0846727	-0.0697537	0.0739062	-0.1045	0.157184	0.0515952	-0.151503	-0.00779077	-0.0165707	-0.0157279
BGRS1	0.057286	-0.293544	-0.337623	-0.33381	-0.525274	-0.516836	-0.500148	-0.275835	-0.218252	-0.310185	-0.492281	-0.203615	-0.482441	-0.359474	-0.353245	-0.647654	-0.543156			-6.12419	0.15016	-0.0112938	0.573574	-0.0160639	-0.032289	-0.448492	-0.20876	0.421225	0.587054	-0.586384	1.36938	-0.254885	-0.0173278	0.83344	-0.161348
BGRS2	-0.421745	-0.397655	-0.256061	-0.207334	-0.430152	-0.61923	-0.658834	-0.509701	-0.532337	-0.541863	-0.639875	-0.714979	-0.449724	-0.666555	-0.573157	-0.656069	-0.558314			-0.0571194	-0.356073	-0.190293	1.07468	0.439562	0.0639568	-0.22636	0.0444106	0.0178951	0.18088	0.117372	-0.370997	0.482142	-0.14012	0.144657	-0.149001
BGRS3	-0.224408	-0.164438	-0.0979508	-0.173197	-0.213331	-0.223777	-0.225246	-0.160468	-0.150844	-0.182047	-0.236207	-0.241407	-0.227166	-0.20364	-0.22389	-0.245234	-0.150054			-0.267239	-0.404329	0.7682	0.231728	0.0489656	0.00656394	-0.287586	-0.0599786	0.206859	0.297504	0.0220166	-0.0589928	-0.103561	0.0994396	0.0953325	-0.388119
BGRS4	-0.2558	-0.160163	-0.0703254	-0.16887	-0.169713	-0.120722	-0.115615	-0.0998155	-0.0984986	-0.202671	-0.163111	-0.392567	-0.159804	-0.201365	-0.203883	-0.108145	-0.0877019			-0.373872	-0.560914	1.40126	0.0049931	-0.28867	-0.0423071	-0.136654	-0.0131934	1.0576	-0.195195	1.40675	-0.592925	0.260075	0.0125044	-0.469572	-0.189035
BGRS5	-0.138539	-0.110195	-0.0413085	-0.0377255	-0.111672	-0.100036	-0.0923355	-0.0948619	-0.0904766	-0.0911884	-0.0973506	-0.276462	-0.334484	-0.357181	-0.262793	-0.240345	-0.234021			-0.204588	-0.625134	-0.0867396	1.96013	-0.104196	-0.0769814	0.0273609	-0.0462282	0.00786672	0.0675774	1.83986	0.209874	0.067856	-0.264258	-0.0854213	-0.0263102
BGRS6	-0.0854325	-0.0640201	-0.147136	-0.0901189	-0.187323	-0.200155	-0.231528	-0.21906	-0.159121	-0.247531	-0.357075	-0.282465	-0.200766	-0.1945	-0.215915	-0.179224	-0.135717			-0.250636	1.29828	-0.387514	1.07862	0.0685046	0.156741	-0.0538488	-0.273621	0.555621	0.442542	-0.208947	-0.289236	-0.0312085	0.110099	-0.16993	-0.242756
BGRS7	-0.107289	-0.0532027	-0.148632	-0.071514	-0.0930989	-0.0724353	-0.105757	-0.10384	-0.116292	-0.13919	-0.221255	-0.254228	-0.0871295	-0.0862196	-0.0885081	-0.0950555	-0.0563315			-0.504116	1.7937	-0.518853	0.301828	-0.221953	0.460017	-0.0181224	0.119913	0.196901	0.589592	0.149024	-0.657278	-0.0104437	0.0265431	0.0739753	-0.407383
BGRS8	-0.353364	-0.580767	-0.169147	0.103222	-0.00203443	-0.359097	-0.262328	-0.490031	0.0640723	-0.0336004	-0.394157	-0.544302	-0.522026	-0.115407	-0.0811728	-0.0927746	-0.0270669			0.643535	-0.708752	-1.61025	-1.01971	175.51	-0.269478	0.868006	-1.13075	-1.52441	10.7307	0.380927	-0.0409256	-0.778925	-0.296637	0.142927	-0.708251
BGRS9	-0.0219776	-0.206737	-0.254676	-0.325522	-0.400377	-0.430217	-0.383202	-0.363972	-0.34785	-0.392047	-0.265513	-0.280144	-0.122426	-0.12885	-0.0951316	-0.177713	-0.257266			8.40669	0.231883	0.278183	0.229953	0.0745289	-0.10928	-0.0501837	-0.0442939	0.127056	-0.322751	0.0551028	-0.562989	0.0524759	-0.261689	0.868078	0.44765
BGRS10	-0.107066	-0.0260542	-0.231377	-0.147155	-0.0792685	0.0100543	-0.0510775	-0.00274852	0.0149518	-0.0397936	-0.12831	-0.246986	-0.181626	-0.201117	-0.181356	-0.118116	-0.0500056			-0.756653	7.8806	-0.364001	-0.461328	-1.12684	-6.08014	-0.946189	-6.43993	-3.66146	2.22438	0.924924	-0.264632	0.107313	-0.0982548	-0.348709	-0.576638
BGRS11	-0.006666	0.100702	-0.177886	-0.0959454	-0.0339752	-0.217965	-0.354313	-0.167629	-0.0943365	-0.306307	-0.3598	-0.18416	-0.476907	-0.181603	-0.151446	-0.347115	-0.163152			-16.1069	-2.76645	-0.460635	-0.64589	5.41541	0.625553	-0.526891	-0.437229	2.24696	0.174639	-0.488161	1.58964	-0.619206	-0.166059	1.292	-0.529978
BGRS12	-0.687856	-0.65277	-0.481909	-0.664271	-0.683323	-0.619587	-0.717231	-0.631799	-0.604261	-0.646281	-0.760012	-0.83419	-0.754242	-0.761898	-0.731983	-0.749931	-0.648912			-0.0510079	-0.261748	0.378418	0.028681	-0.0932737	0.157596	-0.119114	-0.0435874	0.0695397	0.175977	0.0976013	-0.0958384	0.0101502	-0.0392643	0.0245198	-0.134704
BGRS13	-0.292397	-0.0678646	-0.230142	-0.187224	-0.314047	-0.237343	-0.376552	-0.249573	-0.258972	-0.295778	-0.425222	-0.527538	-0.43103	-0.481757	-0.405148	-0.328746	-0.316089			-0.767903	2.3912	-0.186486	0.677387	-0.244243	0.58653	-0.337215	0.0376597	0.142123	0.437638	0.240617	-0.182941	0.117689	-0.159019	-0.188578	-0.0385007
BGRS14	-0.188753	-0.229983	-0.190378	-0.350413	-0.404917	-0.40605	-0.441832	-0.417415	-0.406608	-0.428825	-0.436525	-0.565018	-0.489108	-0.547749	-0.529367	-0.542863	-0.398361			0.218434	-0.172208	0.840619	0.155542	0.00279755	0.0881231	-0.0552649	-0.0258893	0.05464	0.0179553	0.294356	-0.13435	0.119894	-0.033559	0.0254945	-0.266186
BGRS15	-0.072911	-0.0600594	-0.124616	-0.0710549	-0.138377	-0.056557	-0.30718	-0.296715	-0.269465	-0.270711	-0.396459	-0.579863	-0.481405	-0.553982	-0.518882	-0.494435	-0.369587			-0.176264	1.07488	-0.42981	0.947464	-0.591282	4.43133	-0.0340687	-0.0918373	0.00462393	0.464509	0.462605	-0.169795	0.15076	-0.0633584	-0.0471164	-0.252506
BGRS16	-0.0650509	-0.0684244	-0.0885644	-0.0561206	-0.0531402	-0.100226	-0.126655	-0.0491951	-0.0478688	-0.0528472	-0.0707315	-0.151677	-0.112521	-0.0733311	-0.0941642	-0.0465192	-0.110984			0.0518597	0.294339	-0.36633	-0.0531069	0.886059	0.263702	-0.611582	-0.0269591	0.104001	0.338415	1.1444	-0.258153	-0.348289	0.284096	-0.505978	1.38578
BGRS17	-0.219813	-0.115657	0.162412	-0.0857388	-0.20868	-0.0533313	-0.220298	-0.0975148	-0.0693445	-0.147319	-0.305526	-0.398592	-0.312556	-0.320772	-0.200392	-0.300999	-0.14373			-0.473837	-2.40425	-1.52791	1.4339	-0.744435	3.13074	-0.55735	-0.288882	1.12445	1.0739	0.30461	-0.215852	0.0262873	-0.375281	0.502051	-0.522489
BGRS18	-0.0606232	0.144398	-0.205647	-0.0874943	0.0629331	0.174613	0.0813208	0.153875	0.17457	0.0842874	-0.065025	-0.0691052	-0.088937	-0.20465	-0.155024	-0.0577512	0.0140739			-3.3819	-2.42416	-0.574541	-1.71928	1.77458	-0.53428	0.892196	0.134491	-0.517171	-1.77147	0.0627487	0.286979	1.30107	-0.242494	-0.627468	-1.2437
BGRS19	-0.0214775	0.0335786	-0.151245	-0.0250863	-0.017001	0.0141901	-0.0472169	0.0290528	0.0506323	0.00592401	-0.0556738	-0.0291858	-0.0377555	-0.125174	-0.0703782	-0.0879705	-0.00763914			-2.56343	-5.50421	-0.834135	-0.322298	-1.83466	-4.32746	-1.6153	0.742769	-0.882999	-10.398	-0.475771	0.293625	2.31537	-0.437756	0.249969	-0.913163
BGRS20	-0.221801	-0.0815554	0.0952975	-0.111933	-0.205862	-0.0854168	-0.2502	-0.111041	-0.100697	-0.160349	-0.271281	-0.294388	-0.207509	-0.19582	-0.192951	-0.227555	-0.0481935			-0.632303	-2.1685	-2.17456	0.839163	-0.585078	1.92917	-0.55619	-0.0931539	0.592387	0.691815	0.0851758	-0.295119	-0.0563266	-0.0146551	0.179341	-0.788211
BGRS21	-0.195928	-0.0350187	-0.0729172	-0.130566	-0.230027	-0.137873	-0.278638	-0.155773	-0.15875	-0.209248	-0.267582	-0.310213	-0.25241	-0.233179	-0.257447	-0.263299	-0.177933			-0.821267	1.08223	0.790608	0.761764	-0.400622	1.02098	-0.440949	0.0191151	0.318094	0.278778	0.159321	-0.186333	-0.0761902	0.104074	0.0227326	-0.324219
BGRS22	-0.0575976	-0.0533184	-0.0680717	-0.0519302	-0.0586952	-0.052133	-0.0609753	-0.0636319	-0.0675586	-0.0709967	-0.0887062	-0.111813	-0.066379	-0.0555666	-0.0560161	-0.0546047	-0.0481062			-0.0742956	0.276704	-0.237126	0.130271	-0.1118	0.16961	0.0435676	0.0617097	0.0508903	0.249442	0.260485	-0.406338	-0.162889	0.00808971	-0.0251965	-0.11901
BGRS23	0.0989205	0.217958	-0.0927871	0.119636	0.129257	0.177486	0.0622711	0.15208	0.176291	0.12067	0.0304229	0.0639223	0.0271203	-0.09852	-0.0356562	-0.0844961	0.0500405			1.20337	-1.42571	-2.28935	0.080426	0.373123	-0.649149	1.44222	0.159201	-0.315507	-0.747884	1.10113	-0.575729	-4.6327	-0.638082	1.36974	-1.59222
BGRS24	-0.239225	-0.334769	-0.150376	-0.0547078	-0.113254	-0.235333	-0.159052	-0.24835	-0.0756869	-0.108679	-0.155556	-0.214265	-0.191966	-0.170574	-0.150495	-0.15903	-0.153405			0.39939	-0.550806	-0.636194	1.07015	1.07793	-0.324141	0.561444	-0.695241	0.435902	0.431334	0.377415	-0.104074	-0.111434	-0.117715	0.0567156	-0.0353735
BGRS25	-0.162031	-0.153732	-0.119314	-0.168706	-0.231335	-0.249185	-0.236571	-0.334592	-0.336394	-0.336502	-0.366967	-0.181966	-0.17004	-0.0955073	-0.0798288	-0.0708754	-0.0367176			-0.0512203	-0.223883	0.413962	0.371232	0.0771612	-0.0506213	0.414345	0.00538436	0.00032205	0.0905334	-0.504135	-0.0655393	-0.438325	-0.16416	-0.112158	-0.481942
BGRS26	-0.0646472	0.0528044	-0.10527	0.0534038	0.0609802	0.105857	0.0386876	0.0692633	0.0892779	0.0262882	-0.0495896	0.0664891	-0.0322279	-0.0343819	-0.0881549	-0.132631	0.00434125			-1.81681	-2.99359	-1.5073	0.141871	0.735921	-0.634529	0.790323	0.288963	-0.705547	-2.88638	-2.34079	-1.48471	0.0668385	1.56399	0.504524	-1.03273
BGRS27	-0.14981	-0.013609	-0.136326	-0.0425038	-0.075401	-0.0578674	-0.0848482	-0.0952338	-0.115029	-0.143436	-0.239575	-0.276544	-0.0334642	-0.0698972	-0.082911	-0.0977965	-0.048397			-0.909159	9.01737	-0.68822	0.773986	-0.232538	0.466251	0.122402	0.207864	0.246951	0.670254	0.154314	-0.878992	1.08872	0.186185	0.179536	-0.505126
BGRS28	0.0878692	0.203888	-0.0895638	0.17243	0.136854	0.242571	0.0929872	0.156737	0.16065	0.11247	0.0288177	-0.0128082	0.000714646	-0.0566222	-0.00317301	-0.0401054	0.0761387			1.32036	-1.43928	-2.92522	-0.20632	0.772478	-0.61666	0.685572	0.0249659	-0.299907	-0.743773	-1.44445	-1.0558	-80.2311	-0.943962	11.6395	-2.89847
BGRS29	-0.0304018	0.109273	0.0315578	0.128832	0.0754815	0.170219	0.0426571	0.102354	0.0611092	-0.00428179	-0.203506	-0.220804	0.124212	0.112078	0.0665419	0.00500981	0.0959174			-4.59429	-0.711202	3.08241	-0.414108	1.25511	-0.749399	1.39946	-0.402963	-1.07007	46.5283	0.0849996	-1.56254	-0.0976848	-0.406289	-0.924712	18.1459
BGRS30	0.0317931	0.170045	-0.0183267	0.115312	0.0465754	0.070527	-0.0161634	-0.0158237	-0.054924	-0.134629	-0.374749	-0.427048	0.104676	0.10929	0.0668529	0.0103936	0.155666			4.3485	-1.10778	-7.29203	-0.596094	0.514256	-1.22918	-0.0210188	2.471	1.45118	1.78357	0.139556	-1.24512	0.0440727	-0.388297	-0.84453	13.9771
BGRS31	-0.123064	-0.0906634	-0.088447	-0.0914891	-0.0986287	-0.0904646	-0.103455	-0.101622	-0.0979913	-0.101081	-0.117641	-0.119042	-0.109607	-0.10343	-0.0902546	-0.0887947	-0.0792619			-0.263283	-0.0244456	0.0343939	0.0780378	-0.0827758	0.143602	-0.0177222	-0.0357273	0.0315315	0.163831	0.0119083	-0.079258	-0.0563612	-0.127382	-0.0161751	-0.107357
BGRS32	-0.0673831	-0.0325008	-0.106626	-0.0119652	-0.0309104	-0.0108477	-0.0214746	-0.0635697	-0.0723801	-0.0706205	-0.131277	-0.18649	-0.03051	-0.0438236	-0.0544127	-0.0446786	-0.0177088			-0.517671	2.28071	-0.887783	1.58336	-0.649058	0.979636	1.96023	0.138595	-0.0243106	0.858909	0.420583	-0.836399	0.436368	0.241629	-0.178893	-0.603639
BGRS33	0.126409	0.0916467	-0.0484217	0.0694027	0.048717	0.129355	0.0665323	0.117339	0.132649	0.107606	0.0748722	-0.0128505	0.0286423	0.0154326	0.0248625	0.0709507	0.126068			-0.275001	-1.52835	-2.4333	-0.298054	1.65522	-0.48566	0.763639	0.130479	-0.188791	-0.304202	-1.17163	-3.2289	-0.461197	0.611038	1.85372	0.776846
BGRS34	0.0262796	0.030467	-0.0921466	0.0410408	0.0020054	0.0172346	-0.0240411	0.0558705	0.0236372	0.0105176	-0.111416	-0.186734	0.098892	0.0407252	0.0314708	-0.00108456	0.0601416			0.15934	-4.02448	-1.44539	-0.951137	7.59409	-2.39494	-3.32396	-0.576928	-0.555043	-11.5933	0.67601	-1.52959	-0.588185	-0.22724	-1.03446	-56.4526
BGRS35																				#DIV/0!	#DIV/0!	#DIV/0!	#DIV/0!	#DIV/0!	#DIV/0!	#DIV/0!	#DIV/0!	#DIV/0!	#DIV/0!	#DIV/0!	#DIV/0!	#DIV/0!	#DIV/0!	#DIV/0!	#DIV/0!
BRAS1	0.593597	0.416208	0.264593	0.322816	0.112344	-0.159758	-0.302287	-0.386393	-0.294657	-0.265257	-0.220552	-0.293677	-0.182293	-0.360162	-0.406399	-0.187561	-0.322971			-0.298837	-0.364278	0.220049	-0.651987	-2.42204	0.892153	0.278232	-0.237417	-0.0997745	-0.168535	0.331552	-0.379273	0.975734	0.128378	-0.538481	0.721951
BRAS2	0.422393	0.495808	0.487317	0.0934305	-0.136732	-0.10366	0.0795074	-0.0373135	0.141725	0.181629	0.0247044	-0.478802	-0.565121	-0.535649	-0.607518	-0.430281	-0.394377			0.173807	-0.0171258	-0.808276	-2.46346	-0.241871	-1.767	-1.46931	-4.79822	0.281565	-0.863984	-20.3812	0.180281	-0.0521513	0.134171	-0.29174	-0.083444
BRAS3	0.490649	0.29768	0.253562	0.320144	0.180779	0.0774737	-0.0254104	-0.0379473	-0.0535459	-0.105005	0.0253856	-0.0823247	0.085956	-0.305559	-0.306256	-0.127472	-0.241725			-0.393293	-0.148205	0.262584	-0.435319	-0.571445	-1.32799	0.493377	0.411058	0.961033	-1.24176	-4.24297	-2.04411	-4.55483	0.00228164	-0.583773	0.896298
BRAS4	0.0829675	-0.019545	0.125158	0.0839942	0.0695535	0.0689475	0.0568172	0.0387459	0.0283676	0.0552439	0.0702146	-0.232596	-0.0276253	-0.000289705	-0.197765	-0.173906	0.00321638			-1.23557	-7.40359	-0.328894	-0.171926	-0.00871152	-0.175935	-0.318062	-0.267855	0.947431	0.270993	-4.31265	-0.88123	-0.989513	681.641	-0.120642	-1.01849
BRAS5	-0.218999	-0.185875	0.0450104	-0.132106	-0.0730057	-0.137556	-0.165117	-0.233024	-0.184709	-0.197643	-0.221741	-0.183147	-0.171938	-0.192789	-0.139408	-0.0985743	-0.0658341			-0.151248	-1.24215	-3.93501	-0.44737	0.884183	0.200363	0.411265	-0.207339	0.0700209	0.121931	-0.174052	-0.0611999	0.121271	-0.276892	-0.292906	-0.332137
BRAS6	0.0710303	0.103229	0.309821	0.173391	0.146208	0.195799	0.200198	0.182754	0.154604	0.174692	0.172507	0.0527507	0.0411471	0.0354201	-0.048069	-0.0480656	0.00232006			0.453304	2.00131	-0.440349	-0.156778	0.339187	0.0224668	-0.0871325	-0.154031	0.129928	-0.0125085	-0.694211	-0.219971	-0.139183	-2.35711	-6.93253e-05	-1.04827
BRAS7	0.450012	0.47233	0.475057	0.397151	0.328638	0.333241	0.345067	0.327491	0.344463	0.329166	0.354031	0.102097	0.0225624	0.0309837	-0.136845	-0.0182273	0.0393879			0.0495939	0.0057723	-0.163993	-0.172512	0.0140072	0.0354874	-0.0509331	0.0518239	-0.044409	0.075539	-0.711617	-0.779009	0.373245	-5.41669	-0.866804	-3.16093
BRAS8	0.525129	0.44398	0.366524	0.435124	0.311399	0.215319	0.175294	0.139542	0.138577	0.0589494	0.119811	0.117972	0.0727662	-0.0689727	-0.169478	-0.0443102	-0.0962659			-0.154532	-0.174457	0.187163	-0.284343	-0.308545	-0.185887	-0.203956	-0.006913	-0.574609	1.03243	-0.0153478	-0.38319	-1.94787	1.45717	-0.738549	1.17255
BRAS9	0.469549	0.259712	0.0906059	0.168534	-0.0196915	-0.211235	-0.31911	-0.377581	-0.365709	-0.357957	-0.325478	-0.396692	-0.308874	-0.452886	-0.446058	-0.259606	-0.40013			-0.44689	-0.65113	0.860084	-1.11684	9.7272	0.510691	0.18323	-0.031441	-0.0211989	-0.0907346	0.218799	-0.221375	0.466247	-0.0150769	-0.417998	0.541294
BRAS10	0.0213463	0.188102	0.280716	0.261945	0.0278241	0.15759	0.0557455	0.154355	0.0604468	0.0335638	0.070872	-0.0428506	0.0948807	-0.167268	-0.147176	-0.0489909	-0.138993			7.8119	0.492364	-0.0668695	-0.893779	4.66378	-0.646262	1.76893	-0.608391	-0.444738	1.11156	-1.60462	-3.21422	-2.76293	-0.120119	-0.667128	1.83712
BRAS11	0.426344	0.301178	0.296321	0.403757	0.381762	0.387341	0.354862	0.406157	0.279763	0.215192	0.223379	0.188889	0.183634	0.00288743	-0.136678	0.00571155	-0.05201			-0.293582	-0.0161267	0.36257	-0.0544779	0.0146141	-0.0838513	0.14455	-0.311195	-0.230805	0.0380459	-0.154404	-0.027821	-0.984276	-48.3356	-1.04179	-10.1061
BRAS12	0.250223	0.319691	0.535624	0.494669	0.263439	0.335408	0.292496	0.276289	0.303284	0.310362	0.466892	0.325414	0.255997	0.19659	-0.167747	-0.0449623	0.0853916			0.277627	0.675442	-0.0764628	-0.467444	0.27319	-0.12794	-0.0554086	0.0977079	0.0233366	0.504347	-0.303021	-0.21332	-0.232063	-1.85328	-0.731963	-2.89918
BRAS13	0.0849743	0.135703	0.174493	-0.0729824	-0.145227	-0.11397	-0.055651	-0.0713931	-0.0634473	0.0518229	-0.0656976	-0.253407	-0.26988	-0.267104	-0.351281	-0.30938	-0.28045			0.596985	0.285845	-1.41825	0.989891	-0.215225	-0.511707	0.282872	-0.111296	-1.81679	-2.26773	2.85717	0.0650073	-0.0102865	0.315146	-0.119279	-0.0935093
BRAS14	0.307707	0.313108	0.310441	0.274452	0.234276	0.219379	0.218029	0.208542	0.17554	0.180818	0.182869	0.00912951	-0.0265413	-0.0254051	-0.0985978	-0.0516369	-0.024004			0.017555	-0.00851895	-0.115929	-0.146384	-0.0635912	-0.00614945	-0.0435154	-0.158252	0.03007	0.0113396	-0.950076	-3.9072	-0.0428083	2.88103	-0.476288	-0.535138
BRAS15	-0.276847	-0.0374371	0.326441	-0.277388	-0.368405	-0.345228	-0.438984	0.113729	-0.348257	-0.311998	-0.0761842	-0.0150368	-0.0587241	-0.0653929	-0.23618	-0.396137	-0.392956			-0.864774	-9.71973	-1.84973	0.328123	-0.0629111	0.271577	-1.25907	-4.06218	-0.104117	-0.755818	-0.802625	2.90535	0.113562	2.6117	0.677271	-0.00803133
BRAS16	0.130938	0.172919	0.399598	0.180372	0.0185884	0.0579244	0.01196	0.00618689	0.160828	0.161957	0.199355	0.00529058	-0.0231736	-0.0247725	-0.209306	-0.176735	-0.0928157			0.320624	1.31089	-0.548617	-0.896944	2.11616	-0.793523	-0.482703	24.995	0.00702215	0.230907	-0.973461	-5.38017	0.0689959	7.4491	-0.155611	-0.474833
BRAS17	0.389686	0.408308	0.346737	0.419762	0.31291	0.252193	0.261334	0.228771	0.227445	0.149697	0.240274	0.100872	0.0321979	0.0494147	-0.115853	-0.0406814	0.0168027			0.0477886	-0.150797	0.210606	-0.254552	-0.194042	0.036246	-0.124604	-0.00579475	-0.341833	0.605074	-0.58018	-0.680804	0.534719	-3.3445	-0.648853	-1.41303
BRAS18	0.195345	0.238483	0.295405	0.189236	0.153687	0.237073	0.247312	0.25118	0.232115	0.26496	0.25272	0.0309332	-0.01434	-0.013194	-0.190149	-0.152886	-0.0684713			0.220828	0.238684	-0.359401	-0.187858	0.542577	0.0431868	0.0156392	-0.0758984	0.141501	-0.046196	-0.877599	-1.46358	-0.0799102	13.4118	-0.195971	-0.55214
BRAS19	0.23546	0.280202	0.220523	0.232107	0.124037	0.125876	0.103248	0.0817389	0.0774441	0.0545608	0.0781419	-0.0353862	-0.0631594	-0.137122	-0.101236	-0.103677	-0.154112			0.190019	-0.212986	0.0525316	-0.465605	0.0148307	-0.179769	-0.208323	-0.0525429	-0.295481	0.432197	-1.45285	0.784859	1.17104	-0.261707	0.0241082	0.48647
BRAS20	0.39294	0.434015	0.405188	0.412811	0.278693	0.146838	0.0965976	0.0541134	0.08631	0.0362257	0.0884255	0.120245	0.180326	-0.0692094	-0.211327	0.0698457	-0.0804258			0.104532	-0.066418	0.0188134	-0.32489	-0.473121	-0.342147	-0.439806	0.594984	-0.580283	1.44096	0.359846	0.499655	-1.3838	2.05344	-1.33051	-2.15148
BRAS21	0.464785	0.499677	0.455895	0.478187	0.366165	0.271422	0.189866	0.140373	0.171783	0.130953	0.183818	0.182867	0.242048	-0.0341706	-0.190535	0.126936	-0.0331676			0.0750707	-0.0876204	0.0488954	-0.234264	-0.258744	-0.300477	-0.260675	0.223765	-0.237683	0.40369	-0.00517123	0.323627	-1.14117	4.57598	-1.66621	-1.26129
BRAS22	0.403897	0.419322	0.441146	0.352932	0.283359	0.2787	0.279854	0.271527	0.284208	0.27976	0.307275	0.0510883	0.00411166	-0.00156628	-0.101705	-0.0336839	0.00485887			0.0381894	0.0520456	-0.199966	-0.197129	-0.016443	0.00414271	-0.0297566	0.0467049	-0.0156519	0.0983544	-0.833738	-0.919518	-1.38094	63.9341	-0.668808	-1.14425
BRAS23	0.456849	0.452627	0.40828	0.387854	0.231017	0.240908	0.218049	0.179506	0.277193	0.198328	0.248199	0.0110503	-0.110616	-0.133165	-0.353038	-0.239273	-0.169917			-0.00924117	-0.0979754	-0.0500293	-0.404371	0.0428151	-0.0948874	-0.176764	0.544196	-0.284511	0.251454	-0.955478	-11.0102	0.203851	1.65113	-0.322246	-0.28986
BRAS24	-0.010149	0.0245309	0.0666818	-0.068605	-0.115698	-0.107059	-0.061802	-0.0911092	-0.0747386	-0.0157033	-0.0826642	-0.208048	-0.225294	-0.2439	-0.277862	-0.218022	-0.221912			-3.41707	1.71827	-2.02884	0.686439	-0.0746654	-0.422732	0.474211	-0.179682	-0.78989	4.26412	1.51678	0.0828964	0.0825866	0.139244	-0.215358	0.0178403
BRAS25	0.33382	0.362909	0.375701	0.298554	0.23349	0.228158	0.241638	0.233542	0.236098	0.234522	0.255512	0.0172503	-0.0151758	-0.021089	-0.0731048	-0.0374576	-0.0120385			0.0871379	0.0352484	-0.205341	-0.217931	-0.0228365	0.0590816	-0.0335025	0.0109425	-0.00667334	0.0894995	-0.932487	-1.87974	0.389644	2.4665	-0.487617	-0.67861
BRAS26	0.196568	0.247883	0.243374	0.148809	0.0706283	0.0956253	0.128353	0.133001	0.0422489	0.0986792	0.127858	-0.233014	-0.296054	-0.302731	-0.406608	-0.314322	-0.277871			0.26105	-0.0181874	-0.388561	-0.525375	0.353923	0.342248	0.0362155	-0.682342	1.33566	0.295694	-2.82244	0.270544	0.0225547	0.343131	-0.226967	-0.115964
BRAS27	0.36876	0.397419	0.402735	0.328297	0.273899	0.266172	0.268451	0.259907	0.262923	0.260495	0.279696	0.0552357	-0.00822681	-0.00999307	-0.125806	-0.0531168	-0.0134107			0.0777189	0.0133753	-0.184831	-0.165698	-0.0282093	0.0085617	-0.0318284	0.0116045	-0.00923496	0.073711	-0.802515	-1.14894	0.214695	11.5893	-0.577788	-0.747525
BRAS28	0.5641	0.564621	0.574598	0.51121	0.438858	0.446236	0.451403	0.445645	0.435161	0.422834	0.420572	0.166405	0.097147	0.104914	-0.116587	0.0360563	0.09294			0.000923722	0.0176708	-0.110317	-0.141532	0.0168124	0.0115802	-0.0127564	-0.0235267	-0.0283259	-0.0053505	-0.604336	-0.416202	0.079954	-2.11126	-1.30927	1.57763
BRAS29	0.455985	0.478581	0.45997	0.408312	0.365015	0.340912	0.29168	0.276511	0.300111	0.267764	0.294926	0.0978049	0.022667	0.0303969	-0.129268	-0.0284957	0.0174978			0.0495533	-0.0388871	-0.112307	-0.106041	-0.0660328	-0.144413	-0.0520045	0.0853507	-0.107785	0.101441	-0.668375	-0.768243	0.341019	-5.25267	-0.779561	-1.61405
BRAS30	0.66411	0.683721	0.688654	0.614139	0.56419	0.569476	0.591794	0.588063	0.589193	0.573148	0.585541	0.332455	0.222025	0.240545	-0.10971	0.143487	0.218757			0.0295298	0.00721534	-0.108205	-0.0813318	0.00936964	0.0391901	-0.00630342	0.00192042	-0.0272323	0.0216227	-0.432226	-0.332166	0.0834174	-1.45609	-2.30788	0.524571
BRAS31	0.175359	0.169912	0.164052	0.141429	0.115629	0.113387	0.121073	0.117143	0.0998404	0.111933	0.113706	0.00422886	-0.0102167	-0.0109105	-0.0195194	-0.0192912	0.00324227			-0.031061	-0.0344901	-0.1379	-0.182428	-0.0193895	0.0677893	-0.0324628	-0.147703	0.121122	0.0158398	-0.962809	-3.41596	0.067909	0.789038	-0.0116876	-1.16807
BRAS32	0.251784	0.270963	0.285576	0.212234	0.16604	0.180206	0.194868	0.188867	0.199869	0.200623	0.203214	0.0255345	-0.0236297	-0.023895	-0.0977739	-0.0536254	-0.0233473			0.0761741	0.0539277	-0.256822	-0.217654	0.0853135	0.0813654	-0.0307963	0.0582508	0.00377351	0.0129175	-0.874347	-1.9254	0.0112301	3.09181	-0.451537	-0.564622
BRAS33	-0.00890282	-0.00878783	-0.00368712	-0.010578	-0.0137276	-0.0152019	-0.0148442	-0.0167917	-0.0194649	-0.0167667	-0.0112683	-0.0147752	-0.0145844	-0.0183536	-0.0199248	-0.0106271	-0.0121109			-0.0129163	-0.580429	1.86892	0.297744	0.107399	-0.0235286	0.13119	0.159198	-0.138615	-0.327935	0.311214	-0.0129114	0.25844	0.0856076	-0.46664	0.139625
BRAS34	0.558017	0.578952	0.589314	0.506241	0.448372	0.455115	0.469654	0.463648	0.46284	0.448961	0.484274	0.211522	0.133299	0.166011	-0.103698	0.0490482	0.123182			0.0375174	0.0178984	-0.140966	-0.11431	0.0150385	0.0319459	-0.0127881	-0.00174264	-0.0299875	0.0786568	-0.563219	-0.369812	0.245406	-1.62465	-1.47299	1.51145
BRAS35		-0.0287726	-0.0285767	-0.0285716	-0.0285718	-0.0285737	-0.0286588	-0.0285793	-0.0286494	-0.0286893	-0.02861	-0.0289865	-0.0288531	-0.028633	-0.0285776	-0.028507	-0.0285228			#DIV/0!	-0.00680762	-0.000178459	6.21282e-06	6.82169e-05	0.00297709	-0.00277323	0.00245316	0.00139084	-0.00276459	0.0131613	-0.00460202	-0.00762841	-0.00193505	-0.0024726	0.000554715
CANS1	0.149742	0.0867631	0.173667	0.160771	0.162297	0.162182	0.130305	0.00645557	0.0381087	0.0793131	0.111438	-0.458545	-0.399167	-0.124224	-0.206188	-0.13945	-0.247198			-0.420581	1.00162	-0.0742551	0.00949109	-0.000707095	-0.19655	-0.950458	4.90322	1.08124	0.405036	-5.1148	-0.129491	-0.688791	0.659804	-0.323677	0.772667
CANS2	-0.789473	-0.862402	-0.751611	-0.72627	-0.746249	-0.761472	-0.764447	-0.795615	-0.739402	-0.72399	-0.704166	-0.808892	-0.798849	-0.752371	-0.788125	-0.838299	-0.828566			0.0923762	-0.128468	-0.0337148	0.0275085	0.0203992	0.00390674	0.0407725	-0.070654	-0.0208434	-0.0273815	0.148724	-0.0124164	-0.0581807	0.0475217	0.0636616	-0.0116099
CANS3	-0.0124421	-0.0504872	0.0167771	-0.00116399	-0.0353724	-0.0317246	-0.0498776	-0.068533	-0.0555436	-0.0490078	-0.034604	-0.157478	-0.119787	0.0691302	-0.13226	-0.103451	-0.20725			3.05776	-1.33231	-1.06938	29.3889	-0.103125	0.572208	0.374022	-0.189534	-0.117671	-0.293907	3.55087	-0.239344	-1.57711	-2.91321	-0.217824	1.00337
CANS4	-0.208395	-0.176603	-0.156431	-0.109951	-0.143958	-0.154616	-0.159024	-0.159926	-0.146976	-0.142523	-0.17199	-0.0536269	-0.0430648	-0.0392467	-0.0714693	-0.0656027	-0.0709098			-0.152557	-0.114221	-0.297128	0.30929	0.0740419	0.0285091	0.00566949	-0.0809746	-0.0302946	0.206747	-0.688197	-0.196955	-0.08866	0.821028	-0.0820853	0.0808963
CANS5	-0.064545	-0.0597811	-0.0574721	-0.0560404	-0.0584765	-0.0543878	-0.0572144	-0.0569375	-0.0551566	-0.0538921	-0.0307734	-0.0300224	-0.0306926	-0.0354987	-0.0299581	-0.0259302	-0.029994			-0.0738077	-0.0386235	-0.0249116	0.0434708	-0.0699213	0.0519719	-0.00483886	-0.031278	-0.0229271	-0.428981	-0.0244037	0.0223223	0.156587	-0.156076	-0.134451	0.15672
CANS6	-0.498831	-0.214355	0.0242785	0.0166858	-0.00965181	-0.00786633	-0.0425486	-0.0626896	-0.048778	-0.0898709	-0.0123781	0.00105935	-0.226484	-0.163348	-0.199397	-0.339142	-0.380447			-0.570286	-1.11326	-0.312733	-1.57844	-0.184989	4.40895	0.473366	-0.221912	0.842447	-0.862268	-1.08558	-214.796	-0.278765	0.22069	0.700839	0.121793
CANS7	-0.25115	-0.212122	-0.0333507	-0.0519132	-0.092602	-0.091231	-0.108338	-0.130991	-0.115471	-0.107462	-0.0924566	-0.382228	-0.210329	-0.0851477	-0.16972	-0.260016	-0.292544			-0.1554	-0.842776	0.556584	0.783785	-0.0148051	0.187511	0.209094	-0.118477	-0.0693568	-0.139638	3.13413	-0.449728	-0.59517	0.993239	0.532031	0.125099
CANS8	-0.359287	-0.461678	-0.373974	-0.349038	-0.332931	-0.342979	-0.279106	-0.197725	-0.127267	-0.0921414	-0.0786214	-0.163752	-0.142642	-0.204865	-0.418906	-0.410859	-0.412373			0.284987	-0.189968	-0.0666787	-0.0461463	0.0301778	-0.186228	-0.291578	-0.356344	-0.275998	-0.146731	1.0828	-0.128919	0.436219	1.0448	-0.0192095	0.00368426
CANS9	-0.597935	-0.617231	-0.49312	-0.555383	-0.587901	-0.56487	-0.567494	-0.563484	-0.544464	-0.557923	-0.560048	-0.652314	-0.601758	-0.624796	-0.616583	-0.58466	-0.612128			0.0322709	-0.201076	0.126262	0.0585514	-0.0391748	0.00464569	-0.00706632	-0.0337546	0.0247193	0.00380784	0.164748	-0.0775031	0.038284	-0.0131447	-0.051774	0.0469821
CANS10	-0.313755	-0.122316	-0.0697756	-0.064225	-0.139132	-0.0876514	-0.0993883	-0.218072	-0.357562	-0.337222	-0.404311	-0.64705	-0.45222	-0.420541	-0.428062	-0.468283	-0.42255			-0.610154	-0.429547	-0.0795494	1.16632	-0.370012	0.133904	1.19414	0.639652	-0.0568855	0.198948	0.600375	-0.301105	-0.0700517	0.0178835	0.0939594	-0.0976591
CANS11	-0.0134177	-0.0387559	0.0327982	0.0202223	-0.00595268	0.00269998	-0.0150618	-0.0326255	-0.0309251	-0.0204324	0.00829614	-0.00842278	0.0174963	0.11308	-0.110529	-0.122783	-0.158626			1.88841	-1.84628	-0.383433	-1.29436	-1.45357	-6.57849	1.16611	-0.0521195	-0.339293	-1.40603	-2.01526	-3.07726	5.46309	-1.97744	0.110861	0.291927
CANS12	-0.717953	-0.712071	-0.596253	-0.634333	-0.644716	-0.611068	-0.589164	-0.585441	-0.53225	-0.535528	-0.378296	-0.645086	-0.662834	-0.568989	-0.643262	-0.554648	-0.654306			-0.00819294	-0.162649	0.0638659	0.0163678	-0.0521901	-0.0358456	-0.00631998	-0.0908557	0.00615905	-0.293602	0.705241	0.0275127	-0.141581	0.130536	-0.137758	0.179679
CANS13	-0.30394	-0.204611	-0.100474	-0.097983	-0.110673	-0.107488	-0.120139	-0.125015	-0.110237	-0.108196	-0.0888315	-0.212677	-0.18278	-0.107629	-0.357616	-0.360348	-0.285256			-0.326804	-0.508953	-0.0247888	0.129516	-0.0287828	0.117696	0.04059	-0.118216	-0.0185141	-0.178973	1.39416	-0.140576	-0.411157	2.32268	0.00764126	-0.208388
CANS14	-0.436915	-0.40056	-0.337301	-0.227995	-0.220499	-0.107638	-0.314964	-0.343733	-0.296101	-0.296714	-0.273001	-0.291252	-0.289706	-0.288588	-0.386358	-0.322204	-0.247334			-0.0832066	-0.157927	-0.32406	-0.0328773	-0.511843	1.92613	0.0913418	-0.138572	0.0020685	-0.0799164	0.0668504	-0.00530812	-0.00385903	0.338791	-0.16605	-0.232366
CANS15	-0.677526	-0.655204	-0.65285	-0.634695	-0.61821	-0.613338	-0.624873	-0.638782	-0.640151	-0.645923	-0.521276	-0.692567	-0.674606	-0.699301	-0.705271	-0.712958	-0.74603			-0.0329474	-0.00359241	-0.0278093	-0.0259724	-0.00788034	0.0188067	0.0222585	0.00214393	0.00901565	-0.192975	0.328601	-0.0259336	0.0366054	0.008537	0.0108996	0.0463877
CANS16	-0.0931551	-0.117662	-0.0589727	-0.0731296	-0.103558	-0.103537	-0.112864	-0.141199	-0.124509	-0.120542	-0.10301	-0.1759	-0.157074	-0.285921	-0.125954	-0.276618	-0.0975452			0.263076	-0.498796	0.240059	0.416091	-0.000206891	0.0900852	0.251059	-0.118201	-0.0318645	-0.145444	0.707602	-0.107025	0.820294	-0.55948	1.19619	-0.647365
CANS17	-0.294177	-0.328563	-0.203784	-0.239971	-0.306414	-0.29002	-0.299264	-0.312305	-0.304997	-0.295252	-0.299046	-0.3659	-0.368094	-0.281721	-0.486385	-0.502336	-0.461385			0.116891	-0.379771	0.177573	0.276882	-0.0535043	0.0318753	0.0435764	-0.0234004	-0.0319514	0.0128508	0.223557	0.00599441	-0.234647	0.726476	0.0327933	-0.0815196
CANS18	0.0700291	0.0361727	0.130369	0.0842702	0.0662077	0.0856973	0.0614838	0.0442055	0.120634	0.137839	0.160488	0.155846	0.175605	0.309271	0.00427557	-0.0233974	-0.0732814			-0.483462	2.60407	-0.353602	-0.21434	0.29437	-0.282547	-0.281022	1.72893	0.142626	0.164313	-0.0289275	0.126791	0.761169	-0.986175	-6.47235	2.13203
CANS19	-0.0730382	-0.110531	-0.0277928	-0.0413679	-0.0662357	-0.0598443	-0.0745491	-0.10361	-0.0815681	-0.0686072	-0.0517621	-0.159355	-0.143619	-0.0310912	-0.269999	-0.274089	-0.282323			0.513327	-0.748552	0.488444	0.601135	-0.0964938	0.245716	0.389823	-0.212739	-0.158897	-0.245529	2.0786	-0.0987465	-0.783516	7.68409	0.0151477	0.0300413
CANS20	0.0492583	0.0776629	0.123279	0.116797	0.125949	0.134081	0.124404	0.112565	0.116102	0.125544	0.157086	-0.0393118	-0.0305831	-0.0159589	-0.282208	-0.286336	-0.379037			0.576646	0.587365	-0.0525809	0.0783552	0.0645669	-0.0721733	-0.0951647	0.0314214	0.0813253	0.251243	-1.25026	-0.222038	-0.478178	16.6834	0.0146271	0.323747
CANS21	-0.00811458	-0.0214066	0.00140269	-0.0207259	-0.0552436	-0.0470831	-0.0614065	-0.0683118	-0.0336942	-0.0358958	-0.0203806	0.0439389	0.0472396	0.0427842	-0.0901555	-0.09953	-0.0604845			1.63804	-1.06553	-15.7759	1.66543	-0.147719	0.304215	0.112453	-0.506759	0.0653412	-0.432228	-3.15591	0.0751216	-0.0943156	-3.10722	0.103981	-0.392298
CANS22	-0.0566971	-0.0926286	-0.0274782	-0.0437492	-0.0826252	-0.0796747	-0.0907762	-0.0753881	-0.0348884	-0.029505	-0.00913714	-0.117547	-0.0925079	0.068422	-0.068778	-0.0232582	-0.0660535			0.633745	-0.703351	0.59214	0.888612	-0.0357086	0.139335	-0.169517	-0.537216	-0.154305	-0.690318	11.8648	-0.213016	-1.73963	-2.0052	-0.661836	1.84
CANS23	-0.0232132	-0.0303657	0.0420823	0.0217663	0.0217126	0.0597585	0.0411867	0.0352727	0.065632	0.0799698	0.0723	-0.103419	-0.122481	0.117216	-0.388135	-0.446504	-0.414003			0.308122	-2.38585	-0.482768	-0.0024641	1.75224	-0.310781	-0.143592	0.860705	0.218457	-0.0959086	-2.43042	0.184316	-1.95702	-4.31128	0.150383	-0.0727884
CANS24	-0.0535561	-0.0569374	-0.0264331	-0.0381082	-0.0364861	-0.027635	-0.0354244	-0.0400689	-0.0372927	-0.0321658	-0.0175657	-0.0792937	-0.0821312	-0.0226692	-0.124317	-0.12897	-0.117715			0.0631351	-0.535751	0.441682	-0.0425654	-0.242588	0.281867	0.131108	-0.0692856	-0.137478	-0.4539	3.51412	0.0357844	-0.723988	4.48395	0.0374276	-0.0872689
CANS25	-0.144352	-0.173098	-0.116457	-0.124207	-0.151873	-0.151906	-0.161526	-0.176531	-0.156565	-0.149776	-0.13467	-0.199874	-0.179951	-0.0976709	-0.202526	-0.279314	-0.299694			0.199144	-0.327219	0.0665424	0.22275	0.000212592	0.0633321	0.0928935	-0.113104	-0.0433584	-0.100857	0.484176	-0.0996786	-0.457237	1.07355	0.379153	0.0729652
CANS26	0.0578954	0.0508124	0.0477166	0.0682004	0.0780242	0.0903365	0.0661948	0.0423406	0.0871654	0.0861074	0.106739	-0.0116796	-0.00904233	0.0563001	-0.237472	-0.242643	-0.174546			-0.122341	-0.060926	0.429279	0.144043	0.157802	-0.267242	-0.360363	1.05867	-0.0121373	0.239601	-1.10942	-0.225803	-7.22628	-5.21798	0.0217731	-0.280646
CANS27	-0.110745	-0.148343	-0.0758892	-0.096078	-0.13336	-0.132829	-0.143122	-0.161144	-0.144839	-0.137702	-0.124067	-0.231173	-0.21226	-0.0466984	-0.320277	-0.314507	-0.33792			0.339502	-0.48842	0.26603	0.388036	-0.0039783	0.0774889	0.125921	-0.101183	-0.0492763	-0.0990145	0.863286	-0.0818126	-0.779995	5.85842	-0.018015	0.074442
CANS28	-0.367876	-0.421295	-0.322909	-0.32034	-0.357957	-0.350406	-0.362875	-0.387549	-0.357789	-0.347789	-0.344207	-0.442694	-0.4158	-0.173439	-0.563839	-0.578522	-0.601366			0.145208	-0.233532	-0.00795515	0.117427	-0.0210941	0.0355841	0.0679946	-0.0767884	-0.0279495	-0.0102998	0.286126	-0.0607507	-0.582877	2.25093	0.0260404	0.0394869
CANS29	-0.0544094	-0.0988161	-0.0193942	-0.0472829	-0.0887725	-0.0850788	-0.0969606	-0.122788	-0.0833098	-0.0771045	-0.0631373	-0.0822649	-0.0682393	0.0823952	-0.231499	-0.243862	-0.257654			0.816158	-0.803734	1.43799	0.877476	-0.0416092	0.139657	0.266371	-0.321516	-0.0744848	-0.181146	0.302952	-0.170494	-2.20745	-3.80962	0.053402	0.0565564
CANS30	0.0510268	-0.0297899	0.122006	0.089354	0.0156344	0.0336733	0.0100517	-0.0329481	0.0195261	0.0385158	0.0456735	-0.102415	-0.0458158	0.278614	-0.29755	-0.348618	-0.356126			-1.58381	-5.09555	-0.267627	-0.825028	1.15379	-0.701495	-4.27788	-1.59263	0.972533	0.185839	-3.24234	-0.552648	-7.08118	-2.06797	0.171626	0.021538
CANS31	-0.14532	-0.172991	-0.125546	-0.131875	-0.150926	-0.153216	-0.160878	-0.168979	-0.158644	-0.154022	-0.138521	-0.364615	-0.341979	-0.153359	-0.231036	-0.341755	-0.353014			0.190416	-0.274261	0.0504133	0.144458	0.0151761	0.0500075	0.0503527	-0.0611599	-0.0291323	-0.100642	1.6322	-0.0620831	-0.551555	0.506505	0.479231	0.0329432
CANS32	-0.104897	-0.120024	-0.083047	-0.0829148	-0.0971646	-0.10096	-0.106461	-0.111762	-0.111816	-0.107827	-0.0873718	-0.229212	-0.208711	-0.0922376	-0.138095	-0.222342	-0.228446			0.14421	-0.308083	-0.00159182	0.171861	0.0390571	0.0544867	0.0497985	0.000481088	-0.0356765	-0.189702	1.62341	-0.089442	-0.55806	0.497165	0.610068	0.0274517
CANS33	0.296325	0.286158	0.344132	0.359912	0.334487	0.334696	0.329485	0.312084	0.288788	0.296233	0.308086	0.130571	0.165834	0.36746	0.376018	0.243981	0.252412			-0.0343121	0.202595	0.0458544	-0.0706427	0.000625003	-0.01557	-0.0528131	-0.0746459	0.0257811	0.0400112	-0.576187	0.270066	1.21584	0.0232897	-0.351146	0.0345554
CANS34	-0.0850995	-0.128233	-0.0439669	-0.0689843	-0.109025	-0.106312	-0.118254	-0.142992	-0.1163	-0.106357	-0.0953786	-0.189878	-0.169975	-0.00479759	-0.298878	-0.313476	-0.324156			0.506857	-0.657132	0.569005	0.58044	-0.0248922	0.112333	0.209196	-0.186668	-0.0854952	-0.103223	0.990779	-0.104817	-0.971775	61.2975	0.0488436	0.0340692
CANS35																				#DIV/0!	#DIV/0!	#DIV/0!	#DIV/0!	#DIV/0!	#DIV/0!	#DIV/0!	#DIV/0!	#DIV/0!	#DIV/0!	#DIV/0!	#DIV/0!	#DIV/0!	#DIV/0!	#DIV/0!	#DIV/0!
SWIS1	0.202766	0.21183	0.15695	0.134329	0.107964	0.110148	0.122569	0.144177	0.094047	0.0949745	0.156561	0.0955144	-0.0159095	-0.0701394	-0.243483	-0.233788	-0.216114			0.0447047	-0.259076	-0.144131	-0.196272	0.0202342	0.112764	0.176292	-0.347698	0.00986209	0.648451	-0.389922	-1.16657	3.40865	2.47142	-0.0398201	-0.0755994
SWIS2	-0.367532	-0.339025	-0.302704	-0.356639	-0.34662	-0.352229	-0.32091	-0.356228	-0.357757	-0.396933	-0.483874	-0.359986	-0.387755	-0.166921	-0.251761	-0.237783	-0.241619			-0.0775629	-0.107133	0.178178	-0.0280943	0.0161839	-0.0889177	0.110055	0.00429335	0.109504	0.219033	-0.256035	0.0771408	-0.56952	0.508265	-0.0555203	0.0161301
SWIS3	0.0366025	0.049098	-0.0386757	-0.0618136	-0.0943676	-0.0948396	-0.0911599	-0.0765483	-0.118418	-0.129884	-0.0520367	-0.102052	-0.213896	-0.271537	-0.379325	-0.367298	-0.331415			0.341387	-1.78772	0.598252	0.526648	0.00500186	-0.0387987	-0.160285	0.546967	0.096825	-0.599359	0.961161	1.09594	0.269483	0.396958	-0.0317068	-0.097696
SWIS4	-0.278883	-0.245943	-0.22883	-0.247222	-0.206499	-0.191852	-0.183365	-0.126804	-0.143621	-0.129939	-0.132692	-0.29969	-0.0820016	-0.0878237	-0.0894672	-0.0853501	-0.0873655			-0.118114	-0.0695818	0.080373	-0.164723	-0.0709295	-0.0442374	-0.308463	0.132626	-0.0952638	0.0211882	1.25853	-0.726378	0.0710005	0.0187134	-0.0460185	0.0236134
SWIS5	-0.101692	-0.0917611	-0.0866237	-0.0693413	-0.0772095	-0.0685017	-0.06911	-0.062873	-0.0565516	-0.0533654	-0.0500457	-0.256607	-0.0451675	-0.0407326	-0.0620988	-0.0556282	-0.0508829			-0.097654	-0.055987	-0.199512	0.113471	-0.112781	0.00887994	-0.0902481	-0.100542	-0.0563423	-0.0622067	4.12746	-0.823982	-0.0981887	0.524548	-0.104199	-0.0853032
SWIS6	0.147424	0.166627	0.137352	0.150027	0.15417	0.126658	0.128966	0.111666	0.103356	0.110112	0.105035	0.0987162	0.00906103	-0.0276576	-0.210917	-0.190637	-0.180542			0.130252	-0.175689	0.0922803	0.0276159	-0.178455	0.0182246	-0.134142	-0.0744212	0.0653711	-0.046108	-0.0601623	-0.908211	-4.05237	6.62599	-0.0961498	-0.0529559
SWIS7	-0.244741	-0.199493	-0.262553	-0.251575	-0.236733	-0.264185	-0.257629	-0.24576	-0.273855	-0.280668	-0.17734	-0.210767	-0.327891	-0.342643	-0.406587	-0.402411	-0.359495			-0.18488	0.316097	-0.0418097	-0.0589982	0.115961	-0.0248144	-0.0460684	0.114317	0.0248761	-0.368149	0.188489	0.555705	0.0449907	0.186622	-0.0102706	-0.106648
SWIS8	-0.335337	-0.342801	-0.25499	-0.303008	-0.266851	-0.238575	-0.260649	-0.303429	-0.289736	-0.280696	-0.26548	-0.156185	-0.168279	-0.216189	-0.151583	-0.129889	-0.139599			0.0222598	-0.256157	0.188314	-0.119327	-0.105963	0.0925242	0.164129	-0.0451287	-0.0312013	-0.0542048	-0.411687	0.0774302	0.284705	-0.298839	-0.143117	0.0747564
SWIS9	-0.64531	-0.635821	-0.489183	-0.601515	-0.605057	-0.600318	-0.603762	-0.651002	-0.635362	-0.62897	-0.795387	-0.75111	-0.767246	-0.766871	-0.786999	-0.77519	-0.781724			-0.0147051	-0.230627	0.229632	0.00588845	-0.00783256	0.00573691	0.0782419	-0.0240241	-0.0100611	0.264588	-0.0556672	0.0214828	-0.000489418	0.026248	-0.0150058	0.00842897
SWIS10	-0.16238	-0.205474	-0.185009	-0.174472	-0.148915	-0.188348	-0.196375	-0.14851	-0.149859	-0.174306	-0.0466592	-0.0557807	-0.202764	-0.366357	-0.387412	-0.356765	-0.254823			0.265387	-0.0995977	-0.0569516	-0.146485	0.264806	0.0426146	-0.243739	0.0090826	0.163132	-0.732314	0.195491	2.63502	0.806819	0.0574714	-0.0791075	-0.285739
SWIS11	0.13278	0.150433	0.137573	0.155921	0.158072	0.134925	0.142138	0.11989	0.0909103	0.0967321	0.0883627	0.0745317	-0.031696	-0.0704122	-0.23272	-0.219426	-0.198265			0.132946	-0.0854847	0.133372	0.0137938	-0.146432	0.053458	-0.156528	-0.241717	0.0640392	-0.0865217	-0.156525	-1.42527	1.22149	2.3051	-0.0571232	-0.0964391
SWIS12	-0.20389	-0.187222	-0.236853	-0.248304	-0.214955	-0.292059	-0.313908	-0.274256	-0.313473	-0.309328	-0.0867852	-0.425651	-0.468378	-0.542938	-0.428394	-0.533388	-0.460183			-0.0817487	0.265093	0.0483454	-0.134307	0.358698	0.0748094	-0.126317	0.142993	-0.0132217	-0.71944	3.90466	0.100379	0.159187	-0.21097	0.245088	-0.137246
SWIS13	-0.540459	-0.535195	-0.482512	-0.504402	-0.471627	-0.484101	-0.495508	-0.474612	-0.469176	-0.462302	-0.52027	-0.485443	-0.386486	-0.449888	-0.349647	-0.392875	-0.307917			-0.00973969	-0.0984381	0.0453679	-0.0649771	0.026448	0.0235626	-0.0421711	-0.0114534	-0.0146499	0.125388	-0.0669401	-0.203849	0.164047	-0.222813	0.123635	-0.216248
SWIS14	-0.438557	-0.445391	-0.481154	-0.519125	-0.486069	-0.557248	-0.584814	-0.557261	-0.569574	-0.569251	-0.266828	-0.118483	-0.233972	-0.597097	-0.704021	-0.70917	-0.624551			0.0155822	0.0802961	0.0789168	-0.0636774	0.146439	0.0494682	-0.0471147	0.022096	-0.0005664	-0.531265	-0.555958	0.974735	1.552	0.179073	0.00731385	-0.119321
SWIS15	-0.453322	-0.416948	-0.375874	-0.412912	-0.429531	-0.445759	-0.447858	-0.384766	-0.384894	-0.342153	-0.371863	-0.315777	-0.419281	-0.492083	-0.390462	-0.355482	-0.27929			-0.0802376	-0.0985118	0.0985387	0.0402484	0.03778	0.00470786	-0.140874	0.000333367	-0.111046	0.086831	-0.150823	0.327774	0.173635	-0.206512	-0.0895848	-0.214335
SWIS16	-0.222217	-0.238276	-0.316416	-0.351508	-0.31563	-0.303951	-0.309371	-0.294256	-0.304012	-0.257871	-0.24142	-0.093162	-0.133598	-0.0839162	-0.395111	-0.296695	-0.435356			0.0722665	0.327937	0.110905	-0.102067	-0.037004	0.017833	-0.0488582	0.0331571	-0.151774	-0.0637958	-0.614108	0.434036	-0.371874	3.7084	-0.249084	0.467351
SWIS17	-0.092814	-0.0156823	-0.0490149	-0.0499643	-0.0620323	-0.118913	-0.268989	-0.229497	-0.284292	-0.401788	-0.415124	-0.62044	-0.218247	-0.217101	-0.357228	-0.34678	-0.317536			-0.831035	2.12549	0.0193706	0.241532	0.916949	1.26207	-0.146817	0.23876	0.413291	0.0331934	0.494588	-0.648239	-0.005248	0.645443	-0.0292478	-0.0843305
SWIS18	0.0981108	0.121301	0.114541	0.129578	0.117844	0.0966954	0.0987708	0.0774899	0.0640116	0.0719153	0.0887815	0.0631389	-0.0502546	-0.10327	-0.282295	-0.266097	-0.24199			0.236367	-0.0557248	0.131277	-0.0905574	-0.179462	0.0214633	-0.215458	-0.173936	0.123473	0.234529	-0.288829	-1.79594	1.05493	1.73358	-0.0573793	-0.0905974
SWIS19	-0.0815532	-0.0674535	-0.109504	-0.0969169	-0.091596	-0.127243	-0.124757	-0.140733	-0.138251	-0.14589	-0.147746	-0.12675	-0.192428	-0.201738	-0.313699	-0.31155	-0.32657			-0.172889	0.623398	-0.114946	-0.0549019	0.389175	-0.0195394	0.128064	-0.0176366	0.0552538	0.0127197	-0.142109	0.51817	0.0483856	0.554977	-0.00684908	0.0482091
SWIS20	0.166335	0.196189	0.0939908	0.125221	0.148437	0.0203684	0.0188983	-0.0488329	-0.0413858	-0.0849808	-0.101464	-0.231854	-0.0890735	-0.141963	-0.309774	-0.317021	-0.257794			0.179482	-0.520918	0.332272	0.185398	-0.862781	-0.0721752	-3.58399	-0.152502	1.05338	0.193967	1.28508	-0.615822	0.59377	1.18208	0.0233942	-0.186826
SWIS21	-0.160752	-0.137332	-0.167596	-0.159946	-0.169457	-0.172436	-0.175497	-0.154745	-0.220324	-0.216539	-0.163486	-0.193548	-0.319899	-0.330332	-0.420387	-0.416587	-0.371734			-0.145692	0.220369	-0.0456442	0.0594639	0.0175825	0.0177519	-0.118249	0.42379	-0.0171815	-0.245004	0.183878	0.652818	0.032615	0.272617	-0.00903937	-0.107666
SWIS22	-0.212467	-0.194109	-0.227394	-0.217926	-0.217496	-0.226832	-0.221686	-0.212627	-0.230097	-0.233143	-0.181915	-0.204264	-0.300469	-0.252149	-0.334455	-0.348079	-0.323482			-0.0864036	0.171478	-0.0416376	-0.00197456	0.0429267	-0.0226858	-0.040866	0.082166	0.0132357	-0.219728	0.122855	0.470987	-0.160817	0.326418	0.0407354	-0.0706653
SWIS23	0.253329	0.271571	0.191132	0.218712	0.246009	0.154653	0.151214	0.0929684	0.0950902	0.0449754	0.0441461	-0.14077	-0.0170243	-0.0925171	-0.233812	-0.241283	-0.210337			0.0720096	-0.296199	0.144296	0.124813	-0.371354	-0.0222335	-0.385188	0.0228218	-0.527024	-0.0184383	-4.18873	-0.879063	4.43441	1.52723	0.0319515	-0.128255
SWIS24	-0.105186	-0.0957524	-0.118025	-0.112098	-0.109522	-0.131155	-0.128015	-0.136301	-0.130678	-0.134871	-0.130273	-0.194728	-0.176458	-0.201969	-0.259322	-0.29839	-0.2813			-0.0896825	0.232608	-0.0502213	-0.0229796	0.197525	-0.023943	0.0647255	-0.04125	0.0320835	-0.0340948	0.494777	-0.0938245	0.144569	0.283971	0.150656	-0.0572757
SWIS25	0.0445769	0.079995	0.0123554	0.0246432	0.0491493	-0.0392537	-0.037847	-0.0886907	-0.0896281	-0.119588	-0.124812	-0.148707	0.0136915	-0.0670046	-0.210477	-0.294839	-0.27052			0.794537	-0.845548	0.994536	0.994434	-1.79866	-0.0358368	1.3434	0.0105697	0.334273	0.043676	0.191451	-1.09207	-5.89388	2.14123	0.400812	-0.0824817
SWIS26	0.127152	0.159027	0.111524	0.141801	0.163764	0.102113	0.101664	0.052479	0.0430304	0.0311151	0.0126651	-0.0162684	0.0913881	-0.0147311	-0.24925	-0.210456	-0.197338			0.250686	-0.298713	0.271489	0.154885	-0.376466	-0.00439598	-0.483798	-0.180044	-0.276906	-0.592961	-2.28451	-6.61751	-1.16119	15.92	-0.155644	-0.062331
SWIS27	-0.37537	-0.344547	-0.39974	-0.377078	-0.339541	-0.375559	-0.370722	-0.357969	-0.385816	-0.400943	-0.326192	-0.288756	-0.401216	-0.403283	-0.463863	-0.490164	-0.407563			-0.0821149	0.160193	-0.0566931	-0.0995464	0.106078	-0.0128807	-0.0343988	0.0777918	0.0392058	-0.186438	-0.114766	0.389464	0.00515274	0.150216	0.0566995	-0.168517
SWIS28	-0.601681	-0.589269	-0.657415	-0.671615	-0.65318	-0.693021	-0.674003	-0.663089	-0.670852	-0.684044	-0.580729	-0.604184	-0.776034	-0.76033	-0.80353	-0.811579	-0.700365			-0.0206283	0.115645	0.0215987	-0.0274491	0.0609967	-0.0274419	-0.0161934	0.0117069	0.0196655	-0.151037	0.0403893	0.284434	-0.0202358	0.0568167	0.0100175	-0.137034
SWIS29	-0.170817	-0.158751	-0.186505	-0.177752	-0.182306	-0.192739	-0.190627	-0.188258	-0.206808	-0.211535	-0.169737	-0.186275	-0.263531	-0.271784	-0.34618	-0.33603	-0.326391			-0.0706376	0.174829	-0.0469294	0.0256198	0.0572279	-0.0109608	-0.0124228	0.098532	0.0228584	-0.197594	0.0974315	0.41474	0.0313176	0.273734	-0.0293224	-0.0286824
SWIS30	-0.214811	-0.144329	-0.244512	-0.232153	-0.194272	-0.244273	-0.222253	-0.200075	-0.235738	-0.253984	-0.0365513	-0.0624806	-0.386018	-0.367156	-0.466082	-0.493741	-0.334122			-0.328111	0.694126	-0.0505463	-0.163172	0.257378	-0.0901449	-0.0997861	0.178246	0.0774005	-0.856089	0.709397	5.17821	-0.0488639	0.269438	0.0593448	-0.323284
SWIS31	-0.245949	-0.2155	-0.260813	-0.248105	-0.240363	-0.259671	-0.254875	-0.244675	-0.271449	-0.278823	-0.190986	-0.186547	-0.345028	-0.351446	-0.438286	-0.441382	-0.34218			-0.123801	0.210267	-0.0487252	-0.0312027	0.0803269	-0.0184677	-0.0400188	0.109424	0.0271649	-0.315026	-0.0232443	0.849548	0.0186023	0.247093	0.0070633	-0.224753
SWIS32	-0.250132	-0.219348	-0.26555	-0.252149	-0.243221	-0.264464	-0.257911	-0.249155	-0.274303	-0.280918	-0.186534	-0.161456	-0.224847	-0.231825	-0.286273	-0.277205	-0.268849			-0.123074	0.210637	-0.0504664	-0.0354073	0.087341	-0.0247785	-0.0339496	0.100934	0.0241133	-0.335982	-0.134446	0.392625	0.0310316	0.234869	-0.031677	-0.0301437
SWIS33	-0.160308	-0.237383	-0.127487	-0.124624	-0.128262	-0.137715	-0.203725	-0.138207	-0.259349	-0.291154	-0.228491	-0.274038	-0.196307	-0.206755	-0.27179	-0.260249	-0.239353			0.480793	-0.462948	-0.0224577	0.0291924	0.0736966	0.479331	-0.321601	0.876525	0.122635	-0.215222	0.199335	-0.28365	0.0532258	0.314546	-0.04246	-0.0802951
SWIS34	-0.23828	-0.216796	-0.259926	-0.247618	-0.238233	-0.258554	-0.254589	-0.240986	-0.270075	-0.277238	-0.193196	-0.188577	-0.348972	-0.354431	-0.442092	-0.445502	-0.367666			-0.0901641	0.198943	-0.0473503	-0.0379009	0.0852953	-0.0153343	-0.0534301	0.120708	0.026521	-0.303138	-0.0239112	0.850554	0.0156439	0.247328	0.0077151	-0.174717
SWIS35	-0.0286826	-0.0287624	-0.0286256	-0.0286247	-0.0286702	-0.0289141	-0.0290243	-0.0287162	-0.0287686	-0.0296603	-0.0301424	-0.0308704	-0.0307786	-0.0293025	-0.0293316	-0.0288769	-0.0287993			0.00278193	-0.0047568	-3.01947e-05	0.00158784	0.00850826	0.00381041	-0.0106153	0.00182614	0.030995	0.016253	0.0241538	-0.00297483	-0.0479574	0.000991235	-0.0155015	-0.00268766
PRCS1	0.846671	0.779568	0.834372	0.8258	0.884079	0.820873	0.842819	0.876378	0.812038	0.84296	0.889789	0.907032	0.917915	0.904242	0.883204	0.866852	0.860681			-0.0792542	0.0703003	-0.0102739	0.0705729	-0.0714939	0.0267351	0.0398175	-0.0734161	0.0380798	0.0555539	0.0193778	0.0119988	-0.0148957	-0.023266	-0.0185146	-0.00711901
PRCS2	0.864287	0.792784	0.838735	0.839291	0.908252	0.828882	0.853794	0.887089	0.819129	0.857605	0.903643	0.890205	0.913366	0.894014	0.883881	0.870012	0.842697			-0.0827307	0.0579609	0.000662678	0.0821664	-0.087388	0.0300548	0.0389974	-0.0766105	0.0469721	0.0536819	-0.0148707	0.0260167	-0.0211867	-0.0113347	-0.0156914	-0.0313955
PRCS3	0.791871	0.710076	0.779445	0.767637	0.839448	0.764056	0.791612	0.836417	0.752612	0.790427	0.849493	0.885019	0.894554	0.874331	0.853902	0.831223	0.823317			-0.103294	0.0976926	-0.0151487	0.0935485	-0.0898118	0.0360654	0.0565991	-0.100195	0.0502456	0.074727	0.0418195	0.010774	-0.0226069	-0.0233646	-0.0265591	-0.009512
PRCS4	0.377602	0.261215	0.430553	0.400725	0.556423	0.415878	0.469359	0.583901	0.397927	0.49714	0.610807	0.759096	0.715314	0.602556	0.57017	0.49709	0.457501			-0.308228	0.648271	-0.0692778	0.388541	-0.252587	0.128597	0.244039	-0.318503	0.249325	0.228643	0.242774	-0.0576765	-0.157634	-0.0537472	-0.128173	-0.0796412
PRCS5	0.386026	0.263784	0.398488	0.401737	0.49317	0.356703	0.412016	0.515624	0.339666	0.428682	0.528289	0.61178	0.620304	0.513519	0.512013	0.438232	0.38512			-0.316667	0.510657	0.00815471	0.227592	-0.276713	0.155066	0.251466	-0.341252	0.26207	0.232357	0.15804	0.013932	-0.17215	-0.00293196	-0.1441	-0.121195
PRCS6	0.575009	0.408709	0.544704	0.55816	0.690711	0.560712	0.60611	0.660505	0.542586	0.613785	0.692938	0.762122	0.792283	0.765081	0.736622	0.695149	0.623348			-0.289213	0.332744	0.0247034	0.237479	-0.18821	0.0809632	0.0897446	-0.178529	0.131223	0.128957	0.0998426	0.0395749	-0.0343337	-0.0371968	-0.0563028	-0.103288
PRCS7	0.626159	0.439616	0.581554	0.562898	0.682375	0.558017	0.617078	0.715948	0.561412	0.625004	0.726494	0.795602	0.858878	0.851828	0.810797	0.787841	0.756581			-0.297916	0.322869	-0.032081	0.212255	-0.182243	0.10584	0.160222	-0.215848	0.113271	0.162384	0.0951247	0.0795328	-0.00820836	-0.048169	-0.0283121	-0.0396778
PRCS8	0.796889	0.666733	0.750125	0.770497	0.864345	0.761269	0.787956	0.828019	0.73123	0.787352	0.851825	0.880414	0.880418	0.843841	0.838584	0.812149	0.770388			-0.163329	0.125075	0.0271585	0.121801	-0.119254	0.0350567	0.0508436	-0.116892	0.0767504	0.0818851	0.0335618	5.27257e-06	-0.0415455	-0.00622953	-0.0315239	-0.0514202
PRCS9	0.793503	0.675066	0.764217	0.752417	0.851355	0.748802	0.785047	0.835452	0.732727	0.787448	0.853625	0.916485	0.89978	0.879495	0.863719	0.841105	0.826558			-0.149259	0.132062	-0.01544	0.131494	-0.120458	0.0484032	0.0642071	-0.122957	0.0746805	0.08404	0.073639	-0.018227	-0.0225449	-0.0179378	-0.0261814	-0.0172959
PRCS10	0.680943	0.46255	0.622525	0.610721	0.762906	0.582223	0.647083	0.753001	0.561458	0.65681	0.759044	0.890282	0.837476	0.810835	0.813556	0.78636	0.752931			-0.320722	0.345855	-0.0189607	0.249188	-0.236835	0.111401	0.163684	-0.254372	0.169828	0.155653	0.172899	-0.0593133	-0.0318117	0.00335595	-0.0334281	-0.042511
PRCS11	0.766058	0.627687	0.742862	0.720745	0.826101	0.713653	0.755526	0.806312	0.699906	0.763627	0.828825	0.84671	0.881323	0.863188	0.833975	0.7972	0.805611			-0.180627	0.18349	-0.0297722	0.146177	-0.136119	0.0586743	0.0672189	-0.131966	0.0910423	0.0853789	0.0215784	0.0408798	-0.0205765	-0.0338438	-0.0440961	0.0105514
PRCS12	0.84916	0.747866	0.818764	0.806656	0.888249	0.795855	0.826419	0.863982	0.779186	0.831213	0.887874	0.902888	0.928893	0.911265	0.913001	0.898558	0.866449			-0.119287	0.0947999	-0.0147883	0.10115	-0.104019	0.0384042	0.045453	-0.0981457	0.0667711	0.0681666	0.0169105	0.0288015	-0.0189776	0.00190485	-0.0158189	-0.0357338
PRCS13	0.736716	0.587176	0.693259	0.670872	0.800525	0.631772	0.690417	0.753756	0.614846	0.701872	0.785647	0.824119	0.826376	0.801281	0.802687	0.769036	0.70714			-0.202982	0.180667	-0.0322926	0.193261	-0.210802	0.0928253	0.0917403	-0.18429	0.141542	0.11936	0.0489686	0.00273819	-0.0303675	0.00175503	-0.0419232	-0.0804853
PRCS14	0.723091	0.479646	0.657461	0.664358	0.807924	0.642591	0.706465	0.804442	0.637397	0.728771	0.822121	0.882139	0.890079	0.889895	0.874448	0.852912	0.831552			-0.336673	0.370721	0.0104914	0.216097	-0.204639	0.099401	0.138685	-0.207653	0.143355	0.128091	0.0730039	0.00900155	-0.000206452	-0.0173585	-0.0246278	-0.0250446
PRCS15	0.554165	0.446561	0.589536	0.603777	0.714039	0.581894	0.644608	0.710209	0.579654	0.660679	0.746457	0.777912	0.818237	0.832493	0.782416	0.754011	0.724189			-0.194172	0.320168	0.0241569	0.182619	-0.185066	0.107775	0.101768	-0.183825	0.139781	0.129832	0.0421392	0.051837	0.0174229	-0.0601533	-0.036303	-0.0395515
PRCS16	0.573159	0.313759	0.47309	0.420222	0.605204	0.420706	0.50215	0.573176	0.415564	0.531183	0.631772	0.68359	0.749969	0.754348	0.787799	0.747249	0.681069			-0.45258	0.507815	-0.111751	0.440201	-0.304853	0.193591	0.141443	-0.274981	0.278223	0.189368	0.0820197	0.097104	0.0058381	0.0443441	-0.0514722	-0.0885649
PRCS17	0.827062	0.683878	0.762301	0.747057	0.843496	0.724193	0.766343	0.818202	0.713886	0.773134	0.842723	0.862453	0.879995	0.864589	0.850695	0.833011	0.80073			-0.173124	0.114674	-0.0199967	0.129092	-0.141439	0.0582027	0.06767	-0.127494	0.0829942	0.0900095	0.023412	0.0203396	-0.017507	-0.0160704	-0.0207875	-0.0387528
PRCS18	0.243328	0.221843	0.347585	0.37806	0.509647	0.363882	0.436636	0.537223	0.351134	0.451171	0.541309	0.728507	0.765447	0.755774	0.728415	0.67999	0.613655			-0.0882972	0.566808	0.0876753	0.348059	-0.286012	0.199937	0.230368	-0.346389	0.284894	0.199788	0.345824	0.0507077	-0.0126378	-0.0362001	-0.0664802	-0.097552
PRCS19																				#DIV/0!	#DIV/0!	#DIV/0!	#DIV/0!	#DIV/0!	#DIV/0!	#DIV/0!	#DIV/0!	#DIV/0!	#DIV/0!	#DIV/0!	#DIV/0!	#DIV/0!	#DIV/0!	#DIV/0!	#DIV/0!
PRCS20	0.689889	0.511072	0.663607	0.669998	0.776866	0.66503	0.7243	0.806901	0.667692	0.741791	0.828337	0.879419	0.860079	0.855028	0.838105	0.8179	0.792274			-0.259197	0.298462	0.0096306	0.159504	-0.143957	0.0891223	0.114044	-0.172523	0.110978	0.116671	0.061669	-0.0219921	-0.00587343	-0.0197914	-0.0241089	-0.0313316
PRCS21	0.432308	0.218546	0.368155	0.402118	0.595898	0.391695	0.474893	0.608069	0.387051	0.495269	0.617894	0.719704	0.829376	0.825885	0.806068	0.778244	0.749195			-0.494467	0.684565	0.0922521	0.481896	-0.34268	0.212404	0.280434	-0.363476	0.279597	0.247593	0.164769	0.152384	-0.00420874	-0.0239943	-0.0345187	-0.0373261
PRCS22	0.63406	0.460253	0.590755	0.575618	0.683249	0.566949	0.615016	0.70654	0.5745	0.63214	0.733891	0.81018	0.854526	0.839115	0.803228	0.773717	0.749151			-0.274118	0.283546	-0.0256237	0.186983	-0.170216	0.0847823	0.148816	-0.186883	0.100331	0.160963	0.103952	0.0547357	-0.0180341	-0.0427678	-0.0367403	-0.0317508
PRCS23	0.674567	0.508323	0.606392	0.596238	0.726127	0.577982	0.632935	0.70302	0.570414	0.651001	0.748882	0.816305	0.831939	0.831102	0.802929	0.772294	0.747259			-0.246445	0.192925	-0.0167436	0.217847	-0.20402	0.0950769	0.11073	-0.188624	0.141279	0.150354	0.0900312	0.0191519	-0.00100611	-0.0338973	-0.038155	-0.0324158
PRCS24	0.503027	0.293424	0.388448	0.329014	0.446004	0.305998	0.36657	0.454557	0.310121	0.396843	0.506661	0.617584	0.44566	0.460116	0.43633	0.381417	0.3235			-0.416684	0.323847	-0.153004	0.355577	-0.313912	0.19795	0.240028	-0.317751	0.279639	0.27673	0.218928	-0.278381	0.0324377	-0.0516968	-0.125851	-0.151849
PRCS25	0.272355	0.140031	0.260901	0.248771	0.352212	0.252701	0.308433	0.419503	0.278843	0.351551	0.45118	0.575197	0.653548	0.627736	0.547858	0.461855	0.530942			-0.48585	0.863161	-0.0464919	0.415809	-0.282531	0.220544	0.360111	-0.335301	0.260748	0.283396	0.274874	0.136216	-0.0394952	-0.127248	-0.156982	0.149587
PRCS26	0.551127	0.40623	0.490276	0.475784	0.586828	0.459218	0.51148	0.587486	0.451669	0.52947	0.638079	0.741955	0.778599	0.803141	0.77156	0.738822	0.716867			-0.262911	0.206892	-0.0295577	0.233392	-0.217458	0.113807	0.1486	-0.231184	0.172253	0.205128	0.162794	0.0493889	0.0315213	-0.0393228	-0.0424303	-0.0297161
PRCS27	0.586339	0.387938	0.522923	0.512142	0.620387	0.509181	0.561979	0.640772	0.52575	0.59413	0.692769	0.711008	0.804137	0.787851	0.793152	0.773729	0.739304			-0.338373	0.347958	-0.0206171	0.211356	-0.179252	0.103693	0.140205	-0.179505	0.130061	0.166024	0.0263279	0.130981	-0.0202537	0.00672859	-0.0244876	-0.044492
PRCS28	0.710161	0.509648	0.659709	0.647223	0.759122	0.640021	0.695929	0.765242	0.678962	0.740185	0.823395	0.87884	0.909098	0.893876	0.875748	0.855473	0.82352			-0.282348	0.294439	-0.0189266	0.172891	-0.156893	0.0873533	0.0995979	-0.112749	0.0901716	0.112418	0.0673362	0.0344302	-0.0167449	-0.0202797	-0.0231516	-0.0373513
PRCS29	0.549165	0.401609	0.583347	0.602166	0.722269	0.601108	0.663282	0.753741	0.60109	0.676528	0.770368	0.866418	0.878101	0.842001	0.826255	0.793424	0.742529			-0.268691	0.452524	0.0322613	0.199452	-0.167751	0.103432	0.136381	-0.202524	0.125501	0.138708	0.124682	0.0134832	-0.041111	-0.0187006	-0.0397347	-0.0641464
PRCS30	0.703626	0.531976	0.680627	0.684275	0.787771	0.688935	0.739736	0.819314	0.706573	0.76368	0.841999	0.882849	0.912483	0.915441	0.886336	0.872441	0.853628			-0.24395	0.279431	0.00535991	0.15125	-0.125463	0.0737379	0.107576	-0.137604	0.0808215	0.102555	0.0485158	0.0335668	0.00324142	-0.0317933	-0.0156765	-0.0215645
PRCS31	0.0435066	0.127095	0.315953	0.279602	0.369251	0.280108	0.332222	0.481359	0.344256	0.433462	0.549856	0.731758	0.819953	0.697164	0.715426	0.690772	0.653694			1.92129	1.48596	-0.115053	0.320631	-0.241417	0.186051	0.448906	-0.284824	0.259127	0.268522	0.330819	0.120524	-0.149751	0.0261948	-0.0344611	-0.0536765
PRCS32	0.359093	0.254035	0.357661	0.304605	0.368075	0.25143	0.295314	0.384144	0.302454	0.382778	0.478372	0.694806	0.76403	0.533842	0.62345	0.594457	0.545073			-0.292565	0.40792	-0.14834	0.208365	-0.316904	0.174536	0.300798	-0.212655	0.265574	0.249739	0.452438	0.0996306	-0.301281	0.167855	-0.0465041	-0.0830743
PRCS33	0.278042	0.13496	0.2055	0.153751	0.189468	0.130308	0.162659	0.2534	0.16122	0.231802	0.313065	0.644692	0.619588	0.353261	0.461749	0.429475	0.373849			-0.514605	0.522671	-0.251819	0.232301	-0.312239	0.24826	0.557859	-0.363772	0.437798	0.35057	1.05929	-0.0389403	-0.429845	0.307104	-0.0698948	-0.129522
PRCS34	0.618612	0.393755	0.520155	0.482383	0.584397	0.455523	0.513245	0.610994	0.485603	0.558647	0.665813	0.826836	0.790655	0.794901	0.748775	0.725609	0.686544			-0.363487	0.321014	-0.072618	0.211479	-0.220524	0.126716	0.190454	-0.205225	0.150419	0.191831	0.241843	-0.0437575	0.00537009	-0.0580275	-0.0309388	-0.0538368
PRCS35	0.0435066	0.127095	0.2055	0.153751	0.189468	0.130308	0.162659	0.2534	0.16122	0.231802	0.313065	0.575197	0.44566	0.353261	0.43633	0.381417	0.3235			1.92129	0.616896	-0.251819	0.232301	-0.312239	0.24826	0.557859	-0.363772	0.437798	0.35057	0.837312	-0.225204	-0.207331	0.235149	-0.125851	-0.151849
CYPS1	0.275644	0.312161	0.387094	0.284585	0.221927	0.103667	0.100232	0.0569026	-0.0188815	0.0587556	0.00150467	-0.411504	-0.408643	-0.245805	-0.434044	-0.468623	-0.468734			0.132481	0.240044	-0.264816	-0.220176	-0.532877	-0.0331314	-0.432293	-1.33182	-4.11181	-0.974391	-274.484	-0.00695242	-0.398485	0.76581	0.0796663	0.000236918
CYPS2	-0.132391	-0.0585403	-0.159464	-0.22754	-0.274319	-0.324242	-0.346578	-0.315448	-0.340764	-0.351607	-0.277219	-0.319349	-0.346638	-0.345272	-0.395187	-0.367573	-0.37775			-0.557821	1.724	0.426905	0.205587	0.181991	0.0688848	-0.0898206	0.0802544	0.0318207	-0.211567	0.151974	0.0854528	-0.00394336	0.144568	-0.0698753	0.0276887
CYPS3	0.226955	0.232499	0.295415	0.179449	0.0858084	-0.0608299	-0.0495209	-0.0760249	-0.128137	-0.0344922	-0.0902288	-0.482909	-0.486704	-0.366863	-0.529054	-0.548488	-0.544708			0.0244268	0.270605	-0.392553	-0.521822	-1.7089	-0.185911	0.535208	0.685456	-0.730817	1.61591	4.35205	0.00786058	-0.246231	0.442102	0.0367345	-0.0068931
CYPS4	-0.188399	-0.168265	-0.226772	-0.249727	-0.214333	-0.235042	-0.233103	-0.178464	-0.0405191	-0.0390959	-0.0101184	-0.0849827	-0.0796863	-0.125263	-0.141617	-0.144022	-0.0814348			-0.10687	0.347708	0.101225	-0.141729	0.09662	-0.00825102	-0.234397	-0.772957	-0.0351255	-0.741189	7.39879	-0.0623235	0.571956	0.130555	0.0169806	-0.434567
CYPS5	-0.0857494	-0.054211	-0.0624182	-0.0535985	-0.0513943	-0.05507	-0.0563956	-0.0484764	-0.048476	-0.0473788	-0.0439393	-0.059956	-0.0408224	-0.0448186	-0.0588118	-0.0465793	-0.0441496			-0.367798	0.151394	-0.141301	-0.0411245	0.0715205	0.0240711	-0.140422	-8.3289e-06	-0.0226339	-0.072595	0.364519	-0.319127	0.0978913	0.312218	-0.207993	-0.0521633
CYPS6	-0.0997381	-0.0428734	-0.141444	-0.239772	-0.297467	-0.349709	-0.364019	-0.341305	-0.354175	-0.314691	-0.31453	-0.347628	-0.415238	-0.388388	-0.453485	-0.405946	-0.409444			-0.570141	2.29911	0.69517	0.240626	0.175623	0.0409194	-0.0623975	0.0377086	-0.111482	-0.000513305	0.105233	0.194488	-0.0646618	0.167607	-0.10483	0.00861782
CYPS7	-0.308854	-0.269059	-0.263715	-0.324371	-0.358881	-0.365934	-0.489076	-0.576661	-0.520626	-0.561817	-0.42863	-0.642303	-0.654902	-0.662247	-0.721364	-0.743243	-0.697793			-0.128845	-0.0198642	0.230005	0.106392	0.0196528	0.336513	0.179082	-0.0971711	0.079119	-0.237065	0.498503	0.0196144	0.0112154	0.0892677	0.0303308	-0.0611519
CYPS8		-0.140094		-0.111656	-0.389088	-0.461528	-0.45229	-0.435639	-0.12907	-0.150236	-0.150592	-0.165921	-0.0893768	-0.0881707	-0.114205	-0.0778618	-0.0974269			#DIV/0!	-1	#DIV/0!	2.48472	0.186178	-0.0200147	-0.0368147	-0.703724	0.163988	0.00237039	0.101792	-0.461328	-0.0134954	0.295277	-0.31823	0.251281
CYPS9	-0.47931	-0.436115	-0.322102	-0.41488	-0.201258	-0.388763	-0.296012	-0.328518	-0.300688	-0.243405	-0.252409	-0.526834	-0.487169	-0.439897	-0.407393	-0.505925	-0.61881			-0.0901205	-0.261429	0.28804	-0.514899	0.93166	-0.23858	0.109814	-0.0847153	-0.190505	0.0369911	1.08722	-0.0752896	-0.0970334	-0.0738899	0.241859	0.223126
CYPS10	-0.438539	-0.290428	-0.4044	-0.453729	-0.45615	-0.458882	-0.477213	-0.42302	-0.383847	-0.375048	-0.380141	-0.350247	-0.319987	-0.458659	-0.344891	-0.376012	-0.341907			-0.337738	0.392429	0.121981	0.00533489	0.00599012	0.039947	-0.113562	-0.0926032	-0.0229224	0.0135783	-0.0786386	-0.0863961	0.433368	-0.248045	0.0902342	-0.0907019
CYPS11	0.206309	0.275112	0.156894	-0.00322965	-0.127551	-0.257542	-0.309947	-0.566286	-0.671996	-0.699226	-0.428202	-0.681544	-0.427571	-0.385752	-0.461898	-0.64004	-0.416491			0.333493	-0.429707	-1.02058	38.4937	1.01913	0.203483	0.827042	0.186673	0.0405198	-0.387605	0.591642	-0.372643	-0.0978071	0.197397	0.385675	-0.349274
CYPS12	-0.0782582	-0.0612551	-0.105368	-0.253951	-0.284742	-0.348012	-0.366766	-0.343221	-0.357195	-0.315115	-0.309421	-0.343676	-0.423005	-0.38815	-0.456964	-0.404142	-0.406951			-0.217268	0.720148	1.41013	0.12125	0.222201	0.0538884	-0.0641948	0.040713	-0.117806	-0.0180721	0.110708	0.230826	-0.0823993	0.177287	-0.115594	0.00695058
CYPS13	-0.222481	-0.230885	-0.242732	-0.283589	-0.290264	-0.324799	-0.3371	-0.318643	-0.361792	-0.333224	-0.311787	-0.430751	-0.46531	-0.483792	-0.453136	-0.406898	-0.418754			0.0377766	0.0513085	0.168323	0.0235373	0.118977	0.0378749	-0.0547527	0.135414	-0.078962	-0.0643318	0.381553	0.0802314	0.039719	-0.0633665	-0.10204	0.0291384
CYPS14	-0.375818	-0.33231	-0.21308	-0.326021	-0.268008	-0.327069	-0.330229	-0.164341	-0.315971	-0.335904	-0.346793	-0.399812	-0.435791	-0.377873	-0.466819	-0.355091	-0.383696			-0.115769	-0.358792	0.530041	-0.177942	0.220371	0.00965946	-0.502342	0.922655	0.0630855	0.0324178	0.152882	0.0899915	-0.132903	0.235385	-0.239338	0.0805563
CYPS15	-0.0799914	-0.0836974	-0.130843	-0.105038	-0.109288	-0.101034	-0.105858	-0.136848	-0.154781	-0.126878	-0.105238	-0.0559599	-0.0612536	-0.047608	-0.032668	-0.0312184	-0.0650396			0.0463295	0.563284	-0.197223	0.040466	-0.0755218	0.0477393	0.292753	0.131047	-0.180278	-0.170558	-0.468252	0.0945971	-0.222772	-0.313813	-0.0443718	1.08337
CYPS16	-0.432667	-0.455441	-0.362896	-0.255003	-0.247327	-0.259112	-0.277622	-0.235959	-0.197675	-0.203637	-0.215952	-0.25779	-0.180122	-0.205837	-0.294488	-0.222363	-0.247275			0.0526373	-0.203198	-0.297311	-0.0301024	0.0476514	0.0714341	-0.150071	-0.162248	0.0301607	0.0604761	0.193735	-0.301285	0.142769	0.430682	-0.244915	0.112033
CYPS17	-0.300612	-0.080969	-0.321271	-0.425611	-0.502268	-0.57999	-0.57846	-0.587338	-0.575674	-0.546818	-0.557125	-0.540965	-0.535813	-0.551532	-0.593305	-0.612405	-0.589322			-0.730653	2.96783	0.324773	0.18011	0.154742	-0.00263795	0.0153476	-0.0198583	-0.0501268	0.0188498	-0.0290053	-0.00952536	0.0293374	0.0757401	0.0321924	-0.0376915
CYPS18	-0.101078	-0.0436082	-0.152787	-0.287539	-0.354226	-0.42451	-0.458034	-0.452411	-0.480948	-0.405921	-0.40386	-0.414432	-0.510536	-0.457302	-0.558795	-0.486253	-0.488598			-0.568567	2.50364	0.881956	0.231925	0.198413	0.0789732	-0.012278	0.063078	-0.155998	-0.00507803	0.0261792	0.231892	-0.104272	0.22194	-0.129818	0.00482166
CYPS19	-0.295565	-0.00138285	-0.184425	-0.281538	-0.343058	-0.380705	-0.396813	-0.366231	-0.436687	-0.458196	-0.413075	-0.382003	-0.399401	-0.431411	-0.498449	-0.484377	-0.459336			-0.995321	132.366	0.526567	0.218514	0.10974	0.0423118	-0.0770693	0.192382	0.0492549	-0.0984748	-0.0752229	0.0455437	0.0801464	0.155392	-0.028231	-0.0516966
CYPS20	-0.478961	-0.362844	-0.613683	-0.600681	-0.621778	-0.673624	-0.690389	-0.675979	-0.683655	-0.612279	-0.614378	-0.466754	-0.621815	-0.571307	-0.658978	-0.539218	-0.649561			-0.242435	0.691311	-0.0211861	0.0351207	0.0833848	0.0248866	-0.020872	0.0113555	-0.104403	0.00342828	-0.240282	0.332211	-0.0812271	0.153458	-0.181737	0.204635
CYPS21	-0.395236	-0.255647	-0.336657	-0.488848	-0.520106	-0.596716	-0.610101	-0.611812	-0.624592	-0.590523	-0.590082	-0.40711	-0.542993	-0.478408	-0.576419	-0.440159	-0.559809			-0.35318	0.316883	0.452066	0.0639421	0.147296	0.0224311	0.00280497	0.020889	-0.0545469	-0.000745426	-0.310079	0.333773	-0.118943	0.20487	-0.236391	0.271834
CYPS22	-0.347696	-0.297166	-0.311469	-0.391975	-0.435805	-0.492077	-0.482258	-0.504257	-0.484926	-0.463525	-0.502512	-0.697163	-0.67206	-0.616748	-0.705379	-0.721126	-0.707625			-0.145327	0.0481306	0.25847	0.11182	0.129122	-0.0199552	0.0456167	-0.038335	-0.0441334	0.0841117	0.387355	-0.0360078	-0.0823029	0.143707	0.0223241	-0.0187218
CYPS23	-0.497356	-0.449038	-0.557436	-0.554147	-0.529945	-0.556679	-0.582866	-0.549914	-0.508728	-0.516163	-0.531849	-0.541513	-0.579201	-0.519751	-0.556925	-0.498776	-0.573563			-0.0971499	0.241401	-0.00589937	-0.0436755	0.0504468	0.047041	-0.0565337	-0.0748951	0.0146147	0.0303898	0.0181713	0.0695974	-0.102643	0.0715234	-0.104411	0.149941
CYPS24	-0.825739	-0.768051	-0.86404	-0.856798	-0.841942	-0.858491	-0.884464	-0.862078	-0.830788	-0.802619	-0.801161	-0.832809	-0.866604	-0.828953	-0.857451	-0.893154	-0.760082			-0.0698633	0.124978	-0.00838246	-0.0173381	0.019655	0.0302542	-0.0253102	-0.0362956	-0.0339065	-0.00181628	0.0395029	0.0405796	-0.0434474	0.0343782	0.0416384	-0.14899
CYPS25	-0.554579	-0.430061	-0.436677	-0.369277	-0.45055	-0.422924	-0.406026	-0.40123	-0.0671896	-0.617833	-0.501636	-0.486293	-0.244289	-0.0626448	-0.121601	-0.11567	-0.229651			-0.224526	0.0153838	-0.154348	0.220087	-0.0613167	-0.0399558	-0.0118123	-0.832541	8.19536	-0.188072	-0.0305847	-0.497651	-0.743563	0.94112	-0.0487718	0.985393
CYPS26	-0.702813	-0.599768	-0.701933	-0.686611	-0.791065	-0.838321	-0.844851	-0.822822	-0.825808	-0.790218	-0.792848	-0.693286	-0.83443	-0.796566	-0.861489	-0.773796	-0.844403			-0.146618	0.17034	-0.0218277	0.15213	0.0597368	0.00778936	-0.0260739	0.00362817	-0.0430968	0.00332846	-0.125575	0.203587	-0.0453779	0.0815042	-0.101792	0.091248
CYPS27	-0.382299	-0.320989	-0.33526	-0.421814	-0.444197	-0.474819	-0.514113	-0.490781	-0.521194	-0.491602	-0.464755	-0.645572	-0.636299	-0.619284	-0.673389	-0.670722	-0.655644			-0.160372	0.0444593	0.25817	0.0530635	0.068937	0.0827555	-0.0453824	0.0619689	-0.0567767	-0.0546117	0.389058	-0.0143641	-0.0267397	0.0873666	-0.00396099	-0.0224807
CYPS28	-0.475988	-0.281993	-0.351305	-0.558717	-0.637501	-0.733984	-0.803296	-0.797521	-0.807529	-0.781222	-0.75721	-0.926949	-0.875277	-0.865946	-0.879915	-0.820009	-0.901562			-0.407563	0.245797	0.590403	0.141008	0.151345	0.0944334	-0.00718951	0.0125494	-0.0325771	-0.0307371	0.224164	-0.0557438	-0.0106611	0.0161323	-0.0680815	0.0994529
CYPS29	-0.215918	-0.0396751	-0.151588	-0.325758	-0.384116	-0.466696	-0.471537	-0.490492	-0.508113	-0.489693	-0.484336	-0.48311	-0.459108	-0.499187	-0.592799	-0.573261	-0.562044			-0.816249	2.82074	1.14896	0.179146	0.214989	0.0103711	0.0401997	0.0359255	-0.0362531	-0.0109393	-0.00253075	-0.0496828	0.0872979	0.187528	-0.0329577	-0.0195669
CYPS30	-0.272429	0.0181926	-0.073029	-0.330685	-0.410538	-0.523499	-0.644754	-0.636395	-0.64529	-0.618067	-0.590994	-0.802162	-0.689389	-0.690741	-0.791023	-0.826386	-0.770126			-1.06678	-5.01421	3.52814	0.241475	0.275156	0.231623	-0.012965	0.0139771	-0.0421873	-0.0438016	0.357309	-0.140586	0.00196191	0.14518	0.0447055	-0.0680805
CYPS31	-0.21141	-0.177477	-0.211945	-0.27414	-0.303456	-0.35916	-0.35275	-0.484816	-0.455009	-0.465381	-0.308308	-0.339431	-0.536785	-0.346013	-0.379796	-0.524532	-0.464633			-0.160511	0.194212	0.293452	0.106935	0.183566	-0.0178457	0.374389	-0.0614824	0.0227953	-0.337515	0.100947	0.581427	-0.355397	0.0976355	0.381088	-0.114195
CYPS32	-0.340007	-0.305888	-0.317491	-0.366296	-0.379857	-0.409884	-0.434788	-0.426943	-0.448296	-0.417479	-0.397955	-0.617185	-0.618584	-0.592589	-0.634475	-0.607295	-0.586903			-0.100348	0.0379334	0.153719	0.0370229	0.0790485	0.060759	-0.0180426	0.0500129	-0.0687418	-0.0467668	0.550889	0.00226738	-0.0420233	0.0706836	-0.0428394	-0.0335779
CYPS33	-0.156041	-0.147086	-0.16758	-0.162028	-0.146728	-0.18157	-0.203419	-0.184587	-0.201666	-0.190355	-0.190058	-0.209256	-0.198925	-0.219982	-0.202224	-0.176891	-0.172942			-0.0573922	0.139337	-0.0331293	-0.0944286	0.237456	0.120336	-0.0925764	0.0925211	-0.0560869	-0.00156048	0.101014	-0.0493699	0.105854	-0.0807259	-0.12527	-0.0223236
CYPS34	-0.391489	-0.298936	-0.236356	-0.357031	-0.465253	-0.51656	-0.549466	-0.540588	-0.561909	-0.548962	-0.533359	-0.739811	-0.697204	-0.685639	-0.742684	-0.74153	-0.721805			-0.236413	-0.209344	0.510567	0.303116	0.110279	0.0637012	-0.0161579	0.0394409	-0.0230411	-0.0284234	0.38708	-0.0575915	-0.016588	0.0832002	-0.00155412	-0.0266005
CYPS35	-0.266487	-0.219795	-0.265053	-0.29881	-0.31007	-0.333379	-0.325824	-0.297466	-0.282948	-0.308693	-0.308988	-0.302807	-0.308943	-0.305813	-0.335691	-0.317857	-0.308988			-0.175214	0.205912	0.127361	0.0376827	0.0751724	-0.0226621	-0.087035	-0.048805	0.0909864	0.000956026	-0.0200044	0.0202647	-0.0101326	0.0977016	-0.0531264	-0.0279021
CZES1	0.0373436	0.0545475	-0.0854665	0.08576	-0.034669	-0.158148	-0.262262	-0.225051	-0.230379	-0.248558	-0.256879	-0.122593	0.145797	-0.170009	-0.29293	-0.310517	0.294305			0.460691	-2.56683	-2.00343	-1.40426	3.56166	0.65833	-0.141885	0.0236754	0.0789073	0.0334756	-0.522759	-2.18928	-2.16606	0.723029	0.0600378	-1.94779
CZES2	-0.0334942	0.000905477	0.107428	0.014698	-0.0212285	-0.0412766	-0.068315	-0.0511356	-0.051371	-0.0729361	0.0206134	-0.117364	0.00570399	-0.0630002	-0.0631028	-0.205809	-0.0742603			-1.02703	117.643	-0.863183	-2.44431	0.944395	0.655054	-0.251474	0.00460346	0.419792	-1.28262	-6.69361	-1.0486	-12.0449	0.00162867	2.26148	-0.639178
CZES3	0.0794879	0.0734575	-0.0409796	0.0782395	-0.0462941	-0.188751	-0.264663	-0.254147	-0.248878	-0.250702	-0.234256	-0.108018	0.108453	-0.213378	-0.271517	-0.214327	0.217551			-0.0758656	-1.55787	-2.90923	-1.5917	3.07723	0.402175	-0.0397325	-0.0207306	0.00732717	-0.0655996	-0.538891	-2.00403	-2.96746	0.272471	-0.21063	-2.01504
CZES4	-0.411381	-0.360219	-0.346981	-0.359897	-0.34644	-0.332209	-0.343435	-0.294444	-0.373366	-0.38024	-0.286528	-0.325321	-0.305185	-0.309735	-0.339263	-0.386734	-0.329648			-0.124366	-0.0367495	0.0372213	-0.0373902	-0.041078	0.0337932	-0.14265	0.268035	0.0184107	-0.246454	0.135391	-0.0618985	0.0149102	0.0953346	0.139922	-0.147611
CZES5	-0.126852	-0.118124	-0.0921322	-0.0905828	-0.0686935	-0.0600856	-0.061286	-0.0603287	-0.0644466	-0.0988794	-0.0613845	-0.0410685	-0.0363064	-0.0512335	-0.075215	-0.0728794	-0.0510496			-0.0687994	-0.220041	-0.0168171	-0.24165	-0.125309	0.019978	-0.0156188	0.0682566	0.534285	-0.379199	-0.330963	-0.115955	0.411142	0.468082	-0.0310523	-0.299532
CZES6	-0.117701	-0.0402057	-0.048201	-0.0715	-0.105215	-0.104172	-0.10744	-0.135115	-0.158707	-0.213762	-0.140251	-0.394245	-0.312738	-0.328879	-0.23318	-0.281626	-0.275548			-0.658408	0.19886	0.483372	0.471538	-0.00991658	0.0313712	0.25759	0.174605	0.346897	-0.343889	1.81099	-0.206742	0.0516141	-0.290988	0.207765	-0.0215841
CZES7	0.018148	0.0961112	0.0627946	0.0373712	-0.0307619	-0.0178395	-0.0541764	-0.103587	-0.125559	-0.148237	-0.121124	-0.215884	-0.167776	-0.222982	-0.174128	-0.176752	-0.134171			4.29597	-0.346647	-0.404866	-1.82314	-0.420077	2.03688	0.912039	0.212104	0.180621	-0.182902	0.782338	-0.222842	0.329041	-0.219091	0.0150658	-0.240905
CZES8	-0.0476094	-0.0104551	0.0151043	-0.0516506	-0.0948791	-0.0855536	-0.122586	-0.165791	-0.187614	-0.190341	-0.0125926	-0.146004	-0.130217	-0.137262	-0.126668	-0.121393	-0.0843808			-0.780399	-2.44469	-4.41959	0.836942	-0.098289	0.432855	0.35245	0.131627	0.0145376	-0.933842	10.5945	-0.108131	0.0541049	-0.0771809	-0.0416435	-0.304897
CZES9	-0.509231	-0.486037	-0.479331	-0.537899	-0.579359	-0.633992	-0.67247	-0.643488	-0.650549	-0.646937	-0.632635	-0.571109	-0.485278	-0.62304	-0.648123	-0.621862	-0.615548			-0.0455477	-0.0137959	0.122186	0.0770776	0.0942999	0.0606914	-0.0430983	0.0109734	-0.00555233	-0.0221071	-0.0972532	-0.150288	0.283882	0.0402582	-0.0405176	-0.0101541
CZES10	-0.675698	-0.634255	-0.650049	-0.670332	-0.674268	-0.673316	-0.680093	-0.700619	-0.694586	-0.687893	-0.692769	-0.70963	-0.692998	-0.74885	-0.750517	-0.754631	-0.733018			-0.061333	0.0249013	0.0312026	0.00587122	-0.00141137	0.0100641	0.0301812	-0.00861114	-0.00963564	0.00708813	0.0243394	-0.0234379	0.0805953	0.00222502	0.005482	-0.0286406
CZES11	0.027394	0.145182	0.169508	0.102367	0.0620301	-0.0597715	-0.147656	-0.231066	-0.187369	-0.240977	-0.332463	-0.295565	-0.0999508	-0.345756	-0.449714	-0.468111	-0.259562			4.29976	0.167557	-0.396091	-0.394044	-1.96359	1.47035	0.564892	-0.189113	0.286112	0.379647	-0.110984	-0.661832	2.45926	0.300669	0.0409097	-0.445512
CZES12	-0.620049	-0.617943	-0.599759	-0.644058	-0.674878	-0.686935	-0.691983	-0.68613	-0.678123	-0.693124	-0.691653	-0.721402	-0.61871	-0.69268	-0.731477	-0.72718	-0.73008			-0.00339664	-0.0294263	0.0738624	0.0478519	0.0178658	0.00734791	-0.00845791	-0.0116694	0.0221206	-0.0021218	0.0430119	-0.142351	0.119555	0.0560105	-0.00587437	0.00398765
CZES13	-0.700494	-0.692084	-0.702362	-0.704718	-0.706229	-0.700037	-0.706919	-0.695173	-0.680916	-0.668985	-0.621796	-0.698335	-0.615839	-0.702285	-0.679554	-0.678206	-0.696431			-0.0120058	0.0148512	0.00335462	0.00214429	-0.00876882	0.00983197	-0.0166162	-0.020508	-0.0175226	-0.0705379	0.123093	-0.118132	0.14037	-0.0323674	-0.00198365	0.0268733
CZES14	-0.722778	-0.718042	-0.73655	-0.719172	-0.712223	-0.690649	-0.680629	-0.69772	-0.676964	-0.689513	-0.710221	-0.751686	-0.703554	-0.801384	-0.875184	-0.852697	-0.823177			-0.00655167	0.025775	-0.0235927	-0.00966275	-0.0302908	-0.0145094	0.0251117	-0.0297491	0.0185382	0.0300325	0.0583828	-0.0640319	0.139051	0.0920911	-0.025694	-0.03462
CZES15	-0.80221	-0.763721	-0.776521	-0.803693	-0.805137	-0.818494	-0.831574	-0.849513	-0.844508	-0.842256	-0.849176	-0.839008	-0.827062	-0.871407	-0.897563	-0.899464	-0.86816			-0.0479785	0.0167603	0.0349909	0.00179755	0.0165896	0.0159803	0.0215724	-0.00589129	-0.00266666	0.00821532	-0.0119731	-0.014238	0.0536164	0.0300166	0.00211788	-0.0348032
CZES16	-0.196634	-0.144264	-0.191901	-0.241964	-0.157005	-0.26643	-0.296982	-0.191879	-0.188003	-0.182021	-0.17857	-0.388046	-0.360027	-0.437492	-0.383745	-0.352664	-0.298694			-0.266334	0.330211	0.260875	-0.351123	0.696957	0.114669	-0.353902	-0.0201996	-0.0318231	-0.0189572	1.17308	-0.0722058	0.215163	-0.122853	-0.0809924	-0.153037
CZES17	-0.227841	-0.185099	-0.0162957	-0.125423	-0.180291	-0.188676	-0.193302	-0.219639	-0.22433	-0.233353	0.124957	-0.223592	-0.0912184	-0.178155	-0.179779	-0.341571	-0.18246			-0.187599	-0.911962	6.69669	0.437466	0.0465106	0.0245157	0.136251	0.0213562	0.0402218	-1.53549	-2.78935	-0.592032	0.953059	0.0091155	0.899951	-0.465823
CZES18	0.149687	0.216579	0.276086	0.241147	0.180284	0.125784	0.109919	0.0662169	-0.00426056	0.0116535	0.00671313	-0.0808423	0.00560008	-0.0856419	-0.13442	-0.113185	-0.01839			0.44688	0.274759	-0.126552	-0.252386	-0.302301	-0.12613	-0.397585	-1.06434	-3.73521	-0.42394	-13.0424	-1.06927	-16.293	0.569564	-0.157976	-0.837523
CZES19	-0.609443	-0.545245	-0.554142	-0.598055	-0.607032	-0.601947	-0.617034	-0.654906	-0.657022	-0.662811	-0.673473	-0.71112	-0.692797	-0.744145	-0.750163	-0.761391	-0.716386			-0.105339	0.0163168	0.0792453	0.0150097	-0.0083772	0.025065	0.0613776	0.00323084	0.00881037	0.0160869	0.0558996	-0.0257674	0.0741179	0.00808636	0.0149674	-0.0591081
CZES20	-0.0146834	0.039354	0.0263362	-0.101164	-0.190014	-0.22232	-0.268683	-0.351962	-0.380611	-0.398774	-0.139917	-0.330612	-0.249496	-0.318405	-0.30079	-0.343907	-0.175518			-3.68017	-0.330787	-4.84127	0.878265	0.170019	0.208544	0.309954	0.0813968	0.0477212	-0.649133	1.36292	-0.24535	0.276191	-0.0553218	0.143345	-0.489635
CZES21	-0.484816	-0.401414	-0.407584	-0.463381	-0.476122	-0.463879	-0.487302	-0.537472	-0.563497	-0.573457	-0.581981	-0.647784	-0.606473	-0.642866	-0.662276	-0.68412	-0.60689			-0.172029	0.0153713	0.136897	0.0274955	-0.0257132	0.0504943	0.102954	0.0484212	0.0176759	0.0148638	0.113068	-0.0637736	0.0600072	0.0301937	0.0329836	-0.11289
CZES22	-0.034535	0.0199474	-0.00720496	-0.0376067	-0.0752951	-0.0632368	-0.089382	-0.122825	-0.135826	-0.152193	-0.129057	-0.203861	-0.164879	-0.186703	-0.166309	-0.177984	-0.134864			-1.5776	-1.3612	4.21956	1.00217	-0.160147	0.41345	0.374154	0.105852	0.1205	-0.152014	0.579618	-0.191221	0.132365	-0.109235	0.0702004	-0.242269
CZES23	-0.0966355	-0.0380697	-0.107347	-0.191307	-0.243481	-0.249535	-0.28	-0.333358	-0.362698	-0.378837	0.0566994	-0.497505	-0.411263	-0.516337	-0.462848	-0.409801	-0.377802			-0.606048	1.81976	0.782133	0.272723	0.0248644	0.122086	0.190565	0.0880122	0.0444976	-1.14967	-9.77443	-0.173349	0.255492	-0.103593	-0.114611	-0.0780836
CZES24	-0.0453005	-0.048154	-0.0477676	-0.0468518	-0.057523	-0.0630312	-0.0537113	-0.0557772	-0.0540773	-0.0652993	-0.0741555	-0.0827504	-0.0421354	-0.042303	-0.0423062	-0.0392622	-0.0349584			0.062991	-0.00802428	-0.0191729	0.227765	0.0957564	-0.14786	0.0384612	-0.0304756	0.207518	0.135625	0.115904	-0.490813	0.00397628	7.50815e-05	-0.0719516	-0.109616
CZES25	-0.074916	-0.0296607	-0.0515376	-0.0768468	-0.0960967	-0.077297	-0.0994249	-0.116086	-0.124738	-0.133683	-0.103167	-0.115903	-0.0967004	-0.0882564	-0.0783765	-0.0626488	-0.0569482			-0.60408	0.737571	0.491081	0.250497	-0.195634	0.286271	0.167572	0.0745318	0.0717087	-0.22827	0.123453	-0.16568	-0.0873212	-0.111945	-0.200669	-0.0909921
CZES26	0.118081	0.192259	0.188859	0.129708	0.0630209	0.0926066	0.0592608	-0.0101939	-0.0540266	-0.051379	0.126607	-0.161813	-0.0301598	-0.163725	-0.10795	-0.0116945	0.00881544			0.628192	-0.0176848	-0.313204	-0.51413	0.469457	-0.36008	-1.17202	4.29992	-0.0490058	-3.46419	-2.27807	-0.813613	4.42858	-0.340664	-0.891667	-1.75381
CZES27	0.020107	0.0752686	0.0760601	0.045074	-0.00525292	0.0261193	0.00617015	-0.0351662	-0.0659102	-0.0680067	-0.0588566	-0.123589	-0.0948062	-0.12337	-0.130883	-0.12401	-0.0505779			2.7434	0.0105158	-0.40739	-1.11654	-5.97234	-0.76377	-6.6994	0.87425	0.0318082	-0.134547	1.09983	-0.232891	0.301291	0.0608973	-0.0525119	-0.592148
CZES28	0.157647	0.226663	0.214946	0.188983	0.146596	0.136083	0.124341	0.0696058	-0.00765691	0.00525915	0.00410834	-0.141506	-0.0883854	-0.1611	-0.167542	-0.177831	-0.0897046			0.43779	-0.0516928	-0.120791	-0.224289	-0.0717116	-0.0862898	-0.440201	-1.11	-1.68685	-0.218821	-35.4435	-0.375393	0.822698	0.0399876	0.0614128	-0.495563
CZES29	0.0489651	0.169431	0.144236	0.0952336	0.0120805	0.00844647	-0.0128677	-0.0877746	-0.140852	-0.13937	-0.130651	-0.239791	-0.16585	-0.23097	-0.255862	-0.247207	-0.121082			2.46024	-0.1487	-0.339739	-0.873149	-0.300819	-2.52344	5.82133	0.604698	-0.0105206	-0.0625574	0.835354	-0.308356	0.392642	0.107771	-0.0338236	-0.5102
CZES30	0.315431	0.398475	0.39211	0.351715	0.267726	0.288516	0.222943	0.136435	0.0942442	0.0455147	0.0611413	-0.15886	-0.0470064	-0.127638	-0.0952731	-0.134528	0.059349			0.263269	-0.0159719	-0.103022	-0.238797	0.0776544	-0.227277	-0.388029	-0.309237	-0.517056	0.34333	-3.59825	-0.704102	1.71532	-0.253566	0.412028	-1.44116
CZES31	-0.112758	-0.0698985	-0.0461366	-0.0463614	-0.0566909	-0.0662952	-0.0768578	-0.0967476	-0.107552	-0.109061	-0.0338766	-0.152013	-0.108586	-0.150861	-0.127094	-0.0978059	-0.0879654			-0.380101	-0.339948	0.0048724	0.222804	0.169414	0.159327	0.258787	0.111671	0.0140337	-0.689379	3.48726	-0.285676	0.389317	-0.157544	-0.230443	-0.100613
CZES32	-0.084216	-0.0474547	-0.0594559	-0.072615	-0.09703	-0.085077	-0.0989362	-0.115976	-0.123683	-0.133339	-0.112767	-0.154865	-0.135761	-0.159918	-0.144639	-0.144535	-0.117591			-0.436512	0.252898	0.221325	0.336224	-0.123188	0.162902	0.172226	0.0664534	0.0780722	-0.154285	0.373319	-0.123359	0.177938	-0.0955425	-0.00071709	-0.186419
CZES33	-0.0765218	-0.0690259	-0.0720796	-0.076313	-0.0872885	-0.0772125	-0.0754003	-0.0791193	-0.0839663	-0.109663	-0.0872247	-0.176753	-0.178151	-0.205249	-0.19376	-0.163148	-0.0763069			-0.0979577	0.0442408	0.0587323	0.143822	-0.115433	-0.0234707	0.0493236	0.0612617	0.306037	-0.204612	1.02641	0.0079054	0.152107	-0.0559753	-0.157987	-0.532285
CZES34	-0.253823	-0.241027	-0.0723308	-0.252251	-0.325248	-0.362024	-0.333248	-0.345405	-0.34673	-0.343737	-0.348494	-0.465482	-0.360844	-0.363983	-0.392429	-0.404495	-0.430933			-0.0504151	-0.699906	2.48747	0.289383	0.113069	-0.0794851	0.0364789	0.00383481	-0.00863116	0.0138409	0.335695	-0.224794	0.00869691	0.0781529	0.0307462	0.0653625
CZES35	-0.0285714	-0.0303301			-0.0285714	-0.0285714	-0.0303869	-0.0287269	-0.0301946	-0.0310775	-0.0301523	-0.0379518	-0.0318642	-0.0332168	-0.0334677	-0.030151	-0.0293978			0.0615532	-1	#DIV/0!	#DIV/0!	8.23757e-08	0.0635426	-0.0546313	0.0510917	0.0292428	-0.0297724	0.258672	-0.160405	0.0424511	0.00755369	-0.099103	-0.0249813
GERS1	0.424416	0.436204	0.497427	0.450634	0.492091	0.480366	0.481431	0.479379	0.451964	0.421041	0.439797	0.395629	0.461398	0.465716	0.450431	0.393481	0.390314			0.0277748	0.140353	-0.0940691	0.0919969	-0.0238272	0.00221692	-0.00426219	-0.0571889	-0.0684205	0.044549	-0.100428	0.166237	0.00935809	-0.0328195	-0.126434	-0.00804789
GERS2	0.105381	0.149762	0.0440876	-0.0202041	-0.0699498	-0.329947	-0.102421	-0.278161	-0.366576	-0.357309	-0.316627	-0.262496	-0.310239	-0.367904	-0.402176	-0.489236	-0.485249			0.421149	-0.705616	-1.45827	2.46216	3.71692	-0.689582	1.71585	0.317853	-0.0252795	-0.113857	-0.17096	0.181878	0.185874	0.093154	0.216475	-0.00815104
GERS3	0.187777	0.190509	0.298222	0.242174	0.28547	0.267951	0.263263	0.27042	0.241067	0.197306	0.214597	0.189786	0.244751	0.240405	0.200939	0.229976	0.156033			0.0145488	0.565398	-0.18794	0.17878	-0.0613696	-0.0174939	0.0271837	-0.108545	-0.181532	0.0876383	-0.115618	0.289619	-0.0177572	-0.164167	0.144509	-0.321526
GERS4	-0.307959	-0.271687	-0.261962	-0.27038	-0.225634	-0.250122	-0.247392	-0.145601	-0.258256	-0.25265	-0.156073	-0.0740749	-0.108661	-0.10623	-0.115897	-0.121632	-0.0766196			-0.117783	-0.0357935	0.0321355	-0.165493	0.10853	-0.010917	-0.411456	0.773724	-0.0217059	-0.382259	-0.525381	0.466904	-0.0223751	0.0910065	0.0494815	-0.370069
GERS5	-0.0198821	-0.0264038	-0.0681632	-0.0414703	-0.0326773	-0.0413387	-0.0423243	-0.0423474	-0.0388479	-0.0425649	-0.0326856	-0.029443	-0.0274968	-0.0203446	-0.0291675	-0.0363676	-0.0231433			0.328018	1.58157	-0.391603	-0.212031	0.265059	0.0238414	0.000547306	-0.0826379	0.0956801	-0.2321	-0.0992038	-0.0661017	-0.260111	0.433674	0.246854	-0.36363
GERS6	0.347361	0.347954	0.454302	0.348156	0.313808	0.272872	0.260774	0.217403	0.214398	0.201023	0.175352	0.222011	0.217428	0.134315	0.0815799	0.0655108	0.139261			0.00170545	0.305639	-0.233647	-0.098657	-0.130447	-0.0443383	-0.166313	-0.0138236	-0.0623853	-0.127699	0.266087	-0.0206453	-0.382255	-0.392623	-0.196974	1.12578
GERS7	0.532489	0.565667	0.632927	0.537573	0.520283	0.455834	0.4282	0.371675	0.36257	0.34116	0.309558	0.41985	0.3803	0.245103	0.163266	0.149383	0.237637			0.0623086	0.118904	-0.150656	-0.0321629	-0.123873	-0.0606228	-0.132007	-0.0244961	-0.0590497	-0.0926312	0.356289	-0.0942016	-0.355501	-0.333888	-0.0850317	0.590788
GERS8	0.0398386	0.133225	0.0608424	-0.085761	-0.116035	-0.193261	-0.214459	-0.212095	-0.203927	-0.242559	-0.280213	-0.367017	-0.223828	-0.290919	-0.297351	-0.317349	-0.327095			2.34411	-0.543309	-2.40956	0.353001	0.665543	0.109689	-0.0110244	-0.0385125	0.189441	0.155236	0.30978	-0.390141	0.299739	0.0221098	0.0672559	0.0307084
GERS9	-0.235572	-0.249718	-0.0670515	-0.267936	-0.254426	-0.386521	-0.38811	-0.388872	-0.384453	-0.417084	-0.505176	-0.619022	-0.508948	-0.568275	-0.550455	-0.560922	-0.554153			0.0600529	-0.731492	2.99597	-0.0504226	0.519191	0.00410937	0.0019631	-0.0113641	0.0848771	0.21121	0.22536	-0.17782	0.116568	-0.0313574	0.0190149	-0.0120683
GERS10	0.27404	0.381368	0.484787	0.3134	0.266103	0.172492	0.146217	0.0645298	0.0468159	0.00923716	-0.0411262	0.184167	0.0939455	0.196514	0.0859817	0.0416113	0.174974			0.391649	0.271179	-0.353531	-0.150915	-0.351785	-0.152323	-0.558673	-0.274506	-0.802692	-5.45226	-5.47809	-0.489889	1.09179	-0.562466	-0.516045	3.20495
GERS11	0.502388	0.529698	0.629286	0.532832	0.52503	0.47073	0.454409	0.406902	0.405776	0.383853	0.356194	0.442701	0.435935	0.342302	0.25026	0.241572	0.32768			0.0543611	0.188009	-0.153275	-0.0146432	-0.103422	-0.0346727	-0.104546	-0.00276933	-0.0540265	-0.0720569	0.242867	-0.0152838	-0.214788	-0.26889	-0.0347156	0.356448
GERS12	0.48014	0.554735	0.59514	0.445307	0.428705	0.335967	0.286994	0.1895	0.186407	0.134468	0.0794703	0.31793	0.248981	0.259414	0.100521	0.0788688	0.273541			0.155361	0.0728361	-0.25176	-0.037282	-0.216323	-0.145765	-0.339708	-0.0163242	-0.278633	-0.409	3.00062	-0.216869	0.0419013	-0.612506	-0.215403	2.4683
GERS13	0.159936	0.273237	0.288467	0.114297	0.100879	-0.045411	-0.0939837	-0.19928	-0.178726	-0.228312	-0.311799	-0.115918	-0.236147	-0.234322	-0.311736	-0.328919	-0.125693			0.70842	0.0557373	-0.603776	-0.117395	-1.45015	1.06962	1.12037	-0.10314	0.277439	0.365671	-0.628229	1.03719	-0.00772838	0.330374	0.055121	-0.617859
GERS14	-0.0732062	0.0566896	0.404717	0.0203712	0.114753	0.175315	0.100075	-0.0272684	0.0353091	-0.19776	-0.338202	-0.444104	-0.309661	-0.64272	-0.722838	-0.752922	-0.574666			-1.77438	6.13919	-0.949666	4.6331	0.527756	-0.42917	-1.27248	-2.29487	-6.60083	0.71016	0.313134	-0.302728	1.07556	0.124655	0.0416186	-0.236752
GERS15	-0.246824	-0.0977299	-0.0259668	-0.348172	-0.35139	-0.456528	-0.513125	-0.581684	-0.561694	-0.597904	-0.618222	-0.562012	-0.604456	-0.65802	-0.714653	-0.713324	-0.59562			-0.604051	-0.7343	12.4084	0.00924371	0.299204	0.123973	0.133612	-0.034366	0.0644649	0.0339822	-0.0909212	0.0755211	0.0886155	0.0860651	-0.00185987	-0.165007
GERS16	0.0239902	0.0331671	0.103736	0.0568292	0.0177009	-0.19673	-0.22992	-0.0634575	-0.0250802	-0.0936652	-0.0989387	0.069959	-0.178676	0.0115402	0.0378114	0.0407574	0.0813614			0.382527	2.12769	-0.452176	-0.688525	-12.1141	0.168707	-0.724002	-0.604771	2.73462	0.0563023	-1.70709	-3.55401	-1.06459	2.2765	0.0779142	0.996235
GERS17	0.30284	0.408039	0.509186	0.397086	0.345627	0.288956	0.239827	0.158098	0.140868	0.107912	0.0910162	0.307412	0.258971	0.213276	0.168696	0.160224	0.247161			0.347375	0.247887	-0.220155	-0.129591	-0.163967	-0.170023	-0.340784	-0.108982	-0.233949	-0.156569	2.37755	-0.157576	-0.176448	-0.209025	-0.0502194	0.542595
GERS18	0.595991	0.624248	0.729373	0.660554	0.639504	0.58549	0.571798	0.525623	0.534875	0.500588	0.474505	0.584905	0.55965	0.489029	0.416151	0.407372	0.488537			0.0474121	0.168401	-0.0943527	-0.0318678	-0.0844624	-0.0233856	-0.0807532	0.0176004	-0.0641026	-0.0521047	0.232665	-0.0431779	-0.126189	-0.149025	-0.0210975	0.199241
GERS19	-0.0504831	0.108837	0.199078	-0.0918072	-0.116102	-0.265975	-0.325701	-0.403183	-0.384683	-0.422096	-0.44736	-0.230755	-0.256771	-0.335327	-0.432907	-0.429778	-0.348137			-3.1559	0.829143	-1.46116	0.26463	1.29087	0.224553	0.237894	-0.0458838	0.0972555	0.0598533	-0.484185	0.112744	0.305939	0.290997	-0.00722729	-0.189961
GERS20	0.459504	0.525432	0.66807	0.549115	0.544768	0.468353	0.449604	0.390644	0.390602	0.364388	0.326469	0.439272	0.460968	0.285295	0.1599	0.0994278	0.23218			0.143477	0.271468	-0.178057	-0.00791754	-0.14027	-0.0400327	-0.131137	-0.000108765	-0.0671101	-0.104064	0.345527	0.0493895	-0.381095	-0.439528	-0.378188	1.33516
GERS21	0.220417	0.292546	0.485007	0.344864	0.359821	0.295983	0.29167	0.243391	0.223201	0.205847	0.176309	0.315759	0.300844	0.240861	0.177513	0.124334	0.177359			0.327238	0.657884	-0.288952	0.0433728	-0.177415	-0.0145736	-0.165526	-0.0829513	-0.0777504	-0.143495	0.790935	-0.0472333	-0.199383	-0.263007	-0.29958	0.426474
GERS22	0.0729556	0.0779699	0.113847	0.100571	0.0872506	0.061972	0.0542755	0.0406951	0.0373633	0.00902956	0.0317067	0.0510865	0.0656184	0.019273	0.000218727	0.000656492	0.0273663			0.0687311	0.460146	-0.11662	-0.132444	-0.289723	-0.124194	-0.250213	-0.0818703	-0.758331	2.51143	0.611223	0.284457	-0.706287	-0.988651	2.00142	40.6857
GERS23	0.511814	0.560297	0.675268	0.582124	0.570881	0.523768	0.513529	0.474477	0.460955	0.443202	0.423028	0.471077	0.475451	0.313174	0.239351	0.233554	0.288587			0.0947293	0.205196	-0.137937	-0.0193128	-0.082527	-0.0195484	-0.0760469	-0.0284984	-0.0385138	-0.0455184	0.113583	0.00928561	-0.341313	-0.235725	-0.0242175	0.235633
GERS24	-0.456165	-0.472501	-0.390787	-0.417077	-0.386589	-0.381878	-0.401507	-0.374354	-0.360634	-0.401663	-0.352112	-0.255336	-0.376588	-0.298095	-0.439144	-0.433788	-0.328849			0.0358124	-0.172939	0.0672735	-0.0730984	-0.0121866	0.0514011	-0.0676267	-0.0366502	0.113768	-0.123363	-0.274844	0.474872	-0.208432	0.473165	-0.0121952	-0.241914
GERS25	0.223411	0.233356	0.254292	0.156003	0.156329	0.119336	0.103936	0.0774631	0.0818771	0.0715026	0.0535295	0.100854	0.0955713	0.010636	-0.00841182	-0.00560794	0.0285723			0.0445174	0.0897149	-0.386519	0.00208864	-0.236636	-0.129048	-0.254703	0.0569818	-0.126708	-0.251363	0.884083	-0.0523792	-0.888712	-1.79088	-0.333326	-6.09498
GERS26	0.553074	0.602512	0.71213	0.630584	0.623916	0.576347	0.567174	0.527831	0.513413	0.490965	0.472137	0.558687	0.5547	0.408655	0.334408	0.324233	0.37654			0.0893874	0.181936	-0.11451	-0.0105743	-0.0762427	-0.0159159	-0.0693659	-0.0273168	-0.0437234	-0.0383482	0.183316	-0.00713601	-0.263287	-0.181685	-0.0304291	0.161327
GERS27	0.515145	0.54891	0.640908	0.555495	0.531193	0.460516	0.434906	0.38292	0.376783	0.360298	0.332874	0.469242	0.449972	0.327757	0.238094	0.223994	0.303205			0.0655438	0.167601	-0.133268	-0.0437485	-0.133053	-0.0556113	-0.119535	-0.0160261	-0.0437519	-0.0761131	0.409667	-0.0410655	-0.271607	-0.273566	-0.0592195	0.35363
GERS28	0.57217	0.592099	0.69324	0.611024	0.585078	0.520019	0.501928	0.454769	0.4642	0.431891	0.407461	0.503677	0.396534	0.367923	0.287631	0.256236	0.323156			0.0348305	0.170817	-0.118596	-0.0424627	-0.111198	-0.0347896	-0.0939555	0.0207383	-0.0696014	-0.056564	0.236135	-0.212721	-0.0721536	-0.21823	-0.109151	0.261166
GERS29	0.650066	0.680368	0.747757	0.672449	0.66126	0.604979	0.587619	0.541576	0.542319	0.52058	0.491565	0.604295	0.612054	0.480908	0.389353	0.360479	0.447944			0.0466136	0.0990488	-0.100711	-0.0166396	-0.0851126	-0.0286938	-0.0783555	0.00137114	-0.0400848	-0.0557366	0.22933	0.0128405	-0.214272	-0.19038	-0.0741586	0.242635
GERS30	0.74401	0.768518	0.80718	0.73656	0.71758	0.674393	0.661137	0.616223	0.612737	0.593826	0.567775	0.670641	0.646221	0.541395	0.440409	0.4121	0.507705			0.0329407	0.050307	-0.08749	-0.0257672	-0.0601845	-0.019657	-0.0679341	-0.00565745	-0.0308624	-0.0438692	0.181172	-0.0364123	-0.162214	-0.186529	-0.0642784	0.231993
GERS31	0.433971	0.471321	0.601305	0.537383	0.522931	0.465255	0.443889	0.387702	0.40308	0.380261	0.340914	0.474456	0.457754	0.304633	0.217488	0.193526	0.28175			0.086065	0.275788	-0.106306	-0.0268939	-0.110293	-0.0459239	-0.126578	0.0396645	-0.0566126	-0.103473	0.391717	-0.0352029	-0.334504	-0.286065	-0.110178	0.455879
GERS32	0.274083	0.307475	0.372575	0.27205	0.252451	0.213396	0.201155	0.163131	0.17596	0.1571	0.12942	0.201053	0.227362	0.117854	0.0672304	0.0462761	0.100629			0.121832	0.211724	-0.269812	-0.0720443	-0.154703	-0.0573607	-0.189031	0.0786478	-0.107185	-0.176193	0.553492	0.130857	-0.481648	-0.429544	-0.311679	1.17454
GERS33	0.106777	0.11864	0.137403	0.0535828	0.0484555	0.0325917	0.0339876	0.021048	0.0195387	0.0139768	0.0270174	0.043143	0.0581068	0.0094759	-0.0175462	-0.0169155	0.0158165			0.111099	0.158152	-0.610032	-0.0956895	-0.327389	0.0428304	-0.380715	-0.0717077	-0.284659	0.933017	0.596856	0.346843	-0.836923	-2.85167	-0.0359474	-1.93503
GERS34	0.601141	0.630014	0.687243	0.577995	0.545792	0.486339	0.461591	0.407576	0.409063	0.3865	0.352221	0.469987	0.486884	0.336448	0.254173	0.231273	0.324919			0.0480307	0.0908378	-0.158966	-0.055716	-0.108928	-0.0508878	-0.117018	0.00364779	-0.0551585	-0.0886906	0.334352	0.0359522	-0.308977	-0.244539	-0.0900977	0.404915
GERS35		-0.0285714	-0.0285714	-0.0285714	-0.0285714	-0.0285715	-0.0285715	-0.028572	-0.0285714	-0.0285714	-0.0285716	-0.0285714	-0.0285714							#DIV/0!	3.45095e-09	4.55447e-07	-6.2957e-07	1.16106e-06	2.38151e-07	1.72569e-05	-1.84545e-05	-3.60574e-08	6.32259e-06	-6.49553e-06	-3.94916e-08	-1	#DIV/0!	#DIV/0!	#DIV/0!
DENS1	0.0575124	0.0477557	-0.0160757	-0.273275	-0.233547	-0.416559	-0.386096	-0.297441	-0.27458	-0.285088	-0.440193	-0.449883	-0.156128	-0.33066	-0.177742	-0.188683	-0.212242			-0.169646	-1.33662	15.9992	-0.145375	0.783619	-0.0731315	-0.229617	-0.0768614	0.0382705	0.544062	0.0220133	-0.652959	1.11787	-0.462461	0.0615553	0.124858
DENS2	-0.354005	-0.367003	-0.188244	-0.412867	-0.409374	-0.453965	-0.391607	-0.295022	-0.296794	-0.175225	-0.075774	-0.378137	-0.179796	-0.439908	-0.231198	-0.463192	-0.393496			0.0367171	-0.487077	1.19325	-0.0084598	0.108924	-0.137362	-0.246638	0.006007	-0.409608	-0.567562	3.99033	-0.524522	1.44671	-0.474441	1.00344	-0.150468
DENS3	0.0815648	0.079045	0.0527561	-0.201598	-0.185388	-0.333282	-0.262767	-0.202235	-0.188037	-0.237859	-0.344399	-0.216847	-0.0807914	-0.276121	-0.0636022	-0.0391665	-0.44368			-0.0308928	-0.332581	-4.82131	-0.0804081	0.797758	-0.211577	-0.230364	-0.070204	0.264956	0.447911	-0.370361	-0.627427	2.4177	-0.769658	-0.384197	10.3281
DENS4	-0.169762	-0.162472	-0.176317	-0.182186	-0.139445	-0.125017	-0.142709	-0.154757	-0.144748	-0.159095	-0.125673	-0.0984519	-0.0769804	-0.0799835	-0.0957816	-0.0912822	-0.0868308			-0.0429458	0.0852172	0.0332872	-0.234604	-0.103463	0.141518	0.0844184	-0.0646711	0.0991176	-0.210078	-0.216603	-0.218091	0.0390109	0.197516	-0.0469754	-0.0487648
DENS5	-0.0378945	-0.0368645	-0.037598	-0.03844	-0.036646	-0.0378951	-0.0384792	-0.0303017	-0.0405062	-0.0386732	-0.0360848	-0.0616	-0.0493138	-0.0540017	-0.0460508	-0.0455748	-0.0399211			-0.0271806	0.0198969	0.0223941	-0.0466704	0.0340854	0.0154136	-0.212518	0.336764	-0.0452522	-0.0669303	0.707091	-0.199451	0.0950632	-0.147234	-0.0103377	-0.124053
DENS6	-0.213607	-0.256863	-0.25349	0.0215683	-0.0273071	0.0540397	0.0219921	-0.0634969	-0.0145538	-0.154773	-0.182199	0.0273556	-0.227471	0.0081733	-0.057411	-0.0493697	-0.0938367			0.202505	-0.0131305	-1.08509	-2.26608	-2.97896	-0.593039	-3.88727	-0.770796	9.6346	0.177197	-1.15014	-9.31533	-1.03593	-8.0242	-0.140064	0.900693
DENS7	0.213151	0.211311	0.174669	0.196085	0.213692	0.167798	0.166089	0.204878	0.00727616	0.0932954	0.0569897	0.00618165	0.0307318	0.0617764	-0.127182	-0.130309	-0.184881			-0.00863612	-0.173404	0.122611	0.0897933	-0.214768	-0.0101854	0.233542	-0.964485	11.8221	-0.389147	-0.89153	3.97146	1.01018	-3.05874	0.0245892	0.418784
DENS8	-0.626002	-0.655211	-0.587603	-0.669869	-0.633569	-0.6635	-0.636015	-0.588649	-0.543032	-0.437912	-0.377461	-0.39916	-0.37907	-0.363619	-0.194792	-0.144433	-0.0346576			0.0466604	-0.103186	0.140003	-0.0541897	0.0472428	-0.0414244	-0.074474	-0.0774933	-0.19358	-0.138043	0.0574863	-0.0503305	-0.0407612	-0.464297	-0.258527	-0.760043
DENS9	-0.48094	-0.474745	-0.415203	-0.584517	-0.543565	-0.584609	-0.529595	-0.531144	-0.554831	-0.521453	-0.652609	-0.79681	-0.771476	-0.766848	-0.824356	-0.807391	-0.86957			-0.0128795	-0.125419	0.407786	-0.0700615	0.07551	-0.0941037	0.00292381	0.0445967	-0.0601583	0.251519	0.220962	-0.0317953	-0.00599872	0.0749936	-0.0205801	0.0770118
DENS10	-0.199519	-0.21512	-0.195915	-0.0649776	-0.079378	-0.0489517	-0.0513363	-0.0933776	-0.0722751	-0.131821	-0.144631	-0.0392166	-0.160531	-0.0520327	-0.074475	-0.0686896	-0.0954001			0.078191	-0.089274	-0.668338	0.221621	-0.383309	0.0487144	0.818938	-0.225991	0.823872	0.0971835	-0.728851	3.09344	-0.675871	0.431311	-0.0776826	0.388858
DENS11	-0.183278	-0.248105	-0.253026	0.0716267	0.0570012	0.123093	0.127326	0.0106484	0.081812	-0.120954	-0.16545	0.129625	-0.212908	0.106855	-0.00917832	0.00464634	-0.00561184			0.353708	0.0198344	-1.28308	-0.204191	1.15948	0.0343897	-0.916369	6.68304	-2.47844	0.367874	-1.78347	-2.6425	-1.50188	-1.0859	-1.50623	-2.2078
DENS12	-0.134094	-0.191531	-0.201207	0.139344	0.0950433	0.190447	0.168406	0.057771	0.122647	-0.0809069	-0.140182	-0.15639	-0.175107	-0.122458	-0.252697	-0.324376	-0.151345			0.428334	0.0505172	-1.69254	-0.317922	1.00379	-0.115732	-0.656954	1.12298	-1.65967	0.732634	0.115619	0.119681	-0.300665	1.06354	0.283656	-0.533427
DENS13	-0.209453	-0.251239	-0.248601	0.0562757	0.0388886	0.18601	0.183098	0.209593	0.0682498	0.0592091	-0.131132	0.100618	-0.209525	0.0923813	0.0021362	0.0104706	-0.0463468			0.199499	-0.0105011	-1.22637	-0.308962	3.78314	-0.0156528	0.144705	-0.67437	-0.132465	-3.21472	-1.76731	-3.08238	-1.44091	-0.976876	3.90152	-5.42637
DENS14	-0.260752	-0.293847	-0.284496	-0.331065	-0.056489	-0.0203431	-0.356073	-0.34257	-0.348992	-0.361007	-0.363581	-0.251923	-0.138153	-0.397066	-0.473944	-0.489455	-0.335357			0.126921	-0.0318231	0.163691	-0.829372	-0.639875	16.5034	-0.0379216	0.018747	0.034428	0.00712864	-0.307106	-0.451607	1.87411	0.193615	0.0327267	-0.314835
DENS15	-0.373868	-0.349291	-0.349884	-0.373316	-0.348772	-0.338689	-0.322389	-0.31371	-0.330032	-0.282991	-0.296293	-0.217076	-0.0691645	-0.252008	-0.24924	-0.267037	-0.0718062			-0.0657383	0.00169816	0.0669717	-0.0657474	-0.0289097	-0.0481279	-0.0269184	0.0520279	-0.142534	0.0470033	-0.267358	-0.681382	2.64361	-0.0109833	0.0714052	-0.7311
DENS16	-0.126951	-0.119181	-0.121233	-0.250622	-0.230161	-0.220469	-0.21471	-0.187785	-0.226234	-0.247321	-0.244016	-0.160467	-0.166147	-0.249834	-0.210781	-0.220645	-0.270979			-0.0612046	0.0172147	1.06728	-0.0816405	-0.0421071	-0.0261226	-0.125404	0.204755	0.0932061	-0.0133629	-0.342393	0.035399	0.503694	-0.156316	0.0467948	0.228124
DENS17	-0.409208	-0.471072	-0.245547	-0.38202	-0.362597	-0.476971	-0.433751	-0.412023	-0.371006	-0.238131	-0.172963	-0.167674	-0.210822	-0.589192	-0.506498	-0.495347	-0.612345			0.15118	-0.478749	0.555794	-0.0508422	0.315428	-0.0906131	-0.0500926	-0.0995514	-0.358147	-0.273665	-0.0305799	0.257333	1.79473	-0.140351	-0.0220151	0.236194
DENS18	-0.221397	-0.306331	-0.29241	0.203027	0.118588	0.243066	0.245899	0.111855	0.193029	-0.101015	-0.155514	0.268473	-0.223623	0.28936	0.122576	0.137476	0.0767559			0.38363	-0.0454437	-1.69432	-0.415902	1.04967	0.0116571	-0.545119	0.725704	-1.52331	0.539516	-2.72636	-1.83295	-2.29396	-0.576389	0.121559	-0.441679
DENS19	0.120494	0.104804	0.0923119	0.127935	0.145292	0.129836	0.142782	0.177219	0.0367842	0.0871026	0.0796728	0.0398348	0.0546975	0.0646434	-0.0698052	-0.0530926	-0.127756			-0.130207	-0.119199	0.385903	0.135668	-0.106377	0.0997051	0.241187	-0.792436	1.36793	-0.0852994	-0.50002	0.373108	0.181836	-2.07985	-0.239417	1.40629
DENS20	0.0772768	0.00704818	-0.0172315	0.351511	0.329065	0.412211	0.420991	0.312133	0.375736	0.185485	0.0757831	0.0838654	-0.0478891	0.437496	0.288761	0.234744	0.262983			-0.908793	-3.44482	-21.3993	-0.0638571	0.252675	0.0212985	-0.258576	0.20377	-0.506343	-0.591432	0.10665	-1.57102	-10.1356	-0.339968	-0.187064	0.120297
DENS21	-0.209437	-0.238345	-0.243394	0.0115005	-0.0274533	0.0537047	0.0421865	-0.0555878	0.00288153	-0.151893	-0.179158	0.0874066	-0.229685	0.111189	0.00477869	0.0502714	-0.0513076			0.138023	0.0211838	-1.04725	-3.38714	-2.95622	-0.214474	-2.31767	-1.05184	-53.7126	0.179504	-1.48787	-3.62778	-1.48409	-0.957022	9.51991	-2.02061
DENS22	0.0330984	0.0493759	0.028166	0.0429977	0.0686754	0.0523009	0.0716121	0.105115	-0.0577181	-0.000849612	-0.0136458	-0.0299446	-0.0112174	-0.0168968	-0.145601	-0.137298	-0.190793			0.491793	-0.429561	0.526581	0.59719	-0.238433	0.369232	0.467837	-1.5491	-0.98528	15.0612	1.19442	-0.625393	0.506301	7.61704	-0.0570235	0.389626
DENS23	0.0826641	0.0483769	0.02765	0.334806	0.308274	0.390949	0.391633	0.29375	0.344605	0.189289	0.107697	0.0463862	-0.035785	0.306319	0.193426	0.158638	0.153036			-0.414778	-0.428446	11.1087	-0.0792441	0.268187	0.00174873	-0.249936	0.173123	-0.450707	-0.431046	-0.569288	-1.77146	-9.55998	-0.368547	-0.179849	-0.0353168
DENS24	-0.843127	-0.872155	-0.813578	-0.882697	-0.856853	-0.856703	-0.837174	-0.801733	-0.809697	-0.73179	-0.699617	-0.838125	-0.612829	-0.796657	-0.702378	-0.615245	-0.631834			0.0344291	-0.0671637	0.084957	-0.0292784	-0.000174433	-0.0227959	-0.0423338	0.00993264	-0.096217	-0.0439648	0.197977	-0.26881	0.299966	-0.118343	-0.124055	0.0269639
DENS25	-0.000334723	0.0282003	-0.0462651	-0.0236444	0.0457231	0.0743111	0.0489201	0.0555165	-0.0917902	-0.0300371	-0.0608524	-0.0809294	-0.087673	-0.0698746	-0.0907451	-0.0955849	-0.116059			-85.2499	-2.64059	-0.488937	-2.93378	0.625243	-0.341686	0.134841	-2.65339	-0.672763	1.02591	0.32993	0.0833269	-0.203009	0.298686	0.0533338	0.214199
DENS26	-0.694743	-0.731524	-0.599394	-0.719967	-0.695737	-0.702404	-0.672475	-0.63338	-0.644214	-0.539703	-0.337161	-0.64781	-0.190259	-0.46734	-0.224652	-0.0765164	-0.0610664			0.0529421	-0.180622	0.201157	-0.0336533	0.00958213	-0.0426097	-0.0581363	0.0171057	-0.16223	-0.375285	0.921367	-0.706304	1.45634	-0.519296	-0.659401	-0.201917
DENS27	0.227632	0.234112	0.224858	0.252526	0.281473	0.237477	0.238236	0.27324	0.0724847	0.145615	0.125041	0.0631966	0.109495	0.178571	-0.0949847	-0.0908559	-0.160709			0.0284668	-0.0395292	0.123047	0.114631	-0.156307	0.00319574	0.146931	-0.734722	1.0089	-0.141284	-0.494595	0.73261	0.630862	-1.53191	-0.0434675	0.768837
DENS28	0.250677	0.238975	0.322073	0.149811	0.0759801	0.0173726	0.157104	0.191628	0.276613	0.364662	0.281186	0.288158	0.324489	0.319958	0.155861	0.152752	0.103676			-0.0466788	0.347726	-0.534855	-0.492825	-0.771353	8.0432	0.219756	0.443486	0.318312	-0.228914	0.0247961	0.126079	-0.0139634	-0.51287	-0.0199453	-0.321283
DENS29	0.23457	0.222051	0.228238	0.274149	0.293812	0.280481	0.301	0.324252	0.137448	0.218386	0.198925	0.197138	0.226883	0.260926	0.0320703	0.0555682	-0.0811146			-0.0533703	0.0278601	0.201154	0.0717258	-0.0453727	0.0731566	0.0772494	-0.576106	0.588856	-0.0891128	-0.00898391	0.150884	0.150049	-0.87709	0.7327	-2.45973
DENS30	0.381109	0.380003	0.382171	0.412022	0.425608	0.399101	0.41347	0.443115	0.221769	0.316437	0.282804	0.269078	0.328376	0.395328	0.0932516	0.0522005	-0.0507097			-0.0029041	0.00570655	0.0781081	0.0329745	-0.0622806	0.0360048	0.071696	-0.499522	0.426878	-0.106288	-0.0485344	0.220375	0.203888	-0.764116	-0.440218	-1.97144
DENS31	-0.296559	-0.12388	-0.00282822	0.0236008	0.041886	0.0361763	0.0475566	0.0711744	-0.0716427	-0.02181	-0.0389784	-0.0437639	-0.0308003	-0.00478253	-0.127932	-0.131659	-0.175839			-0.582276	-0.97717	-9.34477	0.774771	-0.136316	0.314581	0.496624	-2.00658	-0.695572	0.787178	0.122773	-0.296216	-0.844725	25.7499	0.0291318	0.335559
DENS32	-0.03429	-0.0270583	-0.0406427	-0.0270732	-0.00434989	-0.0105364	-0.00741048	0.0168257	-0.0980385	-0.0569518	-0.0684553	-0.0728797	-0.0616026	-0.0536707	-0.142836	-0.142307	-0.1747			-0.210898	0.502039	-0.333872	-0.839329	1.42222	-0.296678	-3.27053	-6.8267	-0.419088	0.201988	0.0646319	-0.154737	-0.128758	1.66134	-0.00370294	0.227624
DENS33	-0.048548	-0.0513049	-0.0574968	-0.0498557	-0.0394679	-0.0489941	-0.0450174	-0.031682	-0.105639	-0.0778057	-0.0799811	-0.0810715	-0.0903935	-0.0791437	-0.131987	-0.132315	-0.15825			0.0567882	0.120687	-0.132895	-0.208358	0.241364	-0.081166	-0.296227	2.33435	-0.263476	0.0279601	0.0136326	0.114985	-0.124453	0.66769	0.00248264	0.196009
DENS34	0.16565	0.170352	0.160874	0.185465	0.212835	0.186759	0.187567	0.223976	0.0331832	0.100969	0.0718645	0.0484757	0.106477	0.096804	-0.11014	-0.0895801	-0.153169			0.0283882	-0.0556356	0.152855	0.147578	-0.122518	0.00432319	0.194115	-0.851845	2.04277	-0.28825	-0.325458	1.19651	-0.0908486	-2.13777	-0.186672	0.709853
DENS35	-0.132992	-0.0824437	-0.0310815	-0.0201534	-0.00360153	-0.0164017	-0.0140758	-0.00559472	-0.0709035	-0.0430935	-0.043546	-0.0467947	-0.0666247	-0.0598031	-0.0857748	-0.0857405	-0.104733			-0.380083	-0.622997	-0.351595	-0.821294	3.55408	-0.141805	-0.60253	11.6733	-0.392224	0.0105014	0.0746036	0.423765	-0.102387	0.434286	-0.000399488	0.221508
SPAS1	0.528846	0.588362	0.688746	0.741726	0.729227	0.692761	0.647626	0.608567	0.570852	0.581845	0.625043	0.421386	0.633327	0.618569	0.596126	0.593976	0.674906			0.112539	0.170617	0.0769223	-0.0168519	-0.0500064	-0.0651517	-0.0603109	-0.061974	0.019257	0.0742441	-0.325829	0.502963	-0.0233025	-0.036283	-0.00360557	0.13625
SPAS2	0.465866	0.308361	0.471712	0.20025	-0.105215	-0.0712452	0.0638264	-0.228479	-0.162836	-0.173154	-0.177256	-0.281781	-0.39527	-0.324021	-0.428434	-0.351875	-0.369465			-0.338091	0.529741	-0.575482	-1.52542	-0.322862	-1.89587	-4.5797	-0.287304	0.0633596	0.02369	0.589686	0.402757	-0.180255	0.322244	-0.178695	0.0499872
SPAS3	0.503256	0.570777	0.678072	0.728527	0.716069	0.676591	0.618291	0.584365	0.542564	0.54932	0.597864	0.384531	0.609498	0.624365	0.570029	0.587588	0.670994			0.134169	0.18798	0.0744089	-0.0170996	-0.0551321	-0.0861664	-0.0548708	-0.0715329	0.0124514	0.0883723	-0.356826	0.585046	0.024392	-0.0870269	0.0308035	0.141947
SPAS4	0.0391023	0.0820261	0.113355	-0.0915575	-0.165115	-0.217559	-0.230894	-0.17689	-0.256196	-0.272923	-0.219852	-0.214464	-0.139411	-0.175397	-0.220355	-0.236419	-0.268313			1.09773	0.38194	-1.80771	0.803398	0.317626	0.0612928	-0.233889	0.448329	0.0652898	-0.194454	-0.0245047	-0.349958	0.258132	0.256319	0.0729003	0.134906
SPAS5	0.0143611	0.0234787	-0.0106405	-0.0948325	-0.0637257	-0.0682959	-0.0669697	-0.0515085	-0.0617904	-0.0626618	-0.0497685	-0.104563	-0.102586	-0.133296	-0.0987689	-0.0954389	-0.105701			0.634885	-1.4532	7.91245	-0.328019	0.0717166	-0.0194181	-0.230869	0.199616	0.014102	-0.20576	1.101	-0.0189097	0.299355	-0.259024	-0.0337157	0.107526
SPAS6	0.315019	0.357533	0.407279	0.371654	0.321588	0.240995	0.146771	0.117248	0.0944056	0.0971825	0.147185	0.00702868	0.169165	0.195585	0.123208	0.138338	0.202046			0.134956	0.139136	-0.0874711	-0.134711	-0.250608	-0.39098	-0.20115	-0.194821	0.0294144	0.514518	-0.952246	23.0678	0.156179	-0.370052	0.122797	0.460523
SPAS7	0.320004	0.422728	0.570909	0.625058	0.587859	0.506171	0.396746	0.35071	0.297363	0.282972	0.35736	0.0465555	0.389557	0.462491	0.349466	0.358426	0.483715			0.32101	0.350533	0.0948478	-0.0595124	-0.13896	-0.216181	-0.116035	-0.15211	-0.0483981	0.262882	-0.869724	7.3676	0.187222	-0.244384	0.0256406	0.349552
SPAS8	0.409146	0.215996	0.32211	0.189483	-0.199162	-0.136416	0.100643	0.276648	0.223226	0.19788	0.0190717	-0.393716	-0.328967	-0.166906	-0.172431	-0.129155	-0.237196			-0.472082	0.491282	-0.411745	-2.05108	-0.315049	-1.73777	1.74879	-0.193103	-0.113543	-0.90362	-21.644	-0.164456	-0.492637	0.0331076	-0.250978	0.836526
SPAS9	0.407819	0.487117	0.478638	0.323109	0.296845	0.184173	0.182092	0.196293	0.18244	0.13815	0.187467	-0.544975	-0.449518	-0.577426	-0.566651	-0.55803	-0.460599			0.194444	-0.0174064	-0.324941	-0.0812846	-0.379564	-0.0113024	0.0779917	-0.0705721	-0.242768	0.356986	-3.90704	-0.175158	0.284544	-0.0186599	-0.015214	-0.174598
SPAS10	0.178782	0.229927	0.116708	-0.0931479	-0.0804319	-0.107944	-0.184482	-0.200586	-0.203771	-0.204473	-0.244247	-0.374107	-0.19738	-0.175587	-0.231035	-0.120508	-0.0953467			0.286073	-0.492412	-1.79813	-0.136514	0.342056	0.709048	0.0872954	0.0158778	0.00344518	0.194518	0.531677	-0.472396	-0.11041	0.315782	-0.4784	-0.208793
SPAS11	0.551078	0.58318	0.589562	0.412362	0.334241	0.050302	-0.156251	-0.193814	-0.18895	-0.257078	-0.157617	-0.503474	-0.0402448	-0.225897	-0.211116	-0.240108	-0.0401535			0.0582536	0.0109432	-0.300561	-0.189449	-0.849504	-4.10626	0.240399	-0.0250922	0.36056	-0.386889	2.19428	-0.920066	4.61306	-0.065432	0.137326	-0.832769
SPAS12	0.622863	0.644176	0.581333	0.410434	0.339395	0.077232	0.0180395	0.0204767	0.0125739	-0.0739459	0.0345773	-0.486557	-0.13117	-0.111311	-0.246633	-0.302727	-0.160574			0.0342175	-0.0975563	-0.293977	-0.173082	-0.772442	-0.766425	0.135104	-0.38594	-6.88091	-1.4676	-15.0716	-0.730413	-0.151396	1.21571	0.227439	-0.469577
SPAS13	0.38122	0.42616	0.481732	0.328262	0.275977	0.153473	0.0900788	0.092148	0.0843478	0.0693691	0.0342693	-0.0966518	0.107223	0.20248	0.0733857	0.115707	0.118322			0.117886	0.1304	-0.318578	-0.159278	-0.443893	-0.413064	0.0229718	-0.0846493	-0.177582	-0.505987	-3.82036	-2.10937	0.888406	-0.637565	0.576694	0.0225987
SPAS14	0.393231	0.448168	0.515095	0.40427	0.330511	0.250807	0.0964257	0.109409	0.0750837	0.042247	0.0205186	0.0209329	0.230785	0.110246	-0.324964	-0.449354	0.07971			0.139706	0.149336	-0.215155	-0.182449	-0.241155	-0.615538	0.13465	-0.313737	-0.437335	-0.514318	0.0201902	10.025	-0.5223	-3.94763	0.382782	-1.17739
SPAS15	-0.270527	-0.195497	-0.262189	-0.42402	-0.448457	-0.461688	-0.494906	-0.5288	-0.496022	-0.510354	-0.548951	-0.582508	-0.427431	-0.387819	-0.549267	-0.513795	-0.534704			-0.277346	0.341137	0.617233	0.0576328	0.0295024	0.0719486	0.0684872	-0.0619863	0.0288946	0.075627	0.0611301	-0.266223	-0.0926748	0.416299	-0.0645821	0.0406961
SPAS16	0.290121	0.33538	0.414392	0.407916	0.352961	0.274667	0.187643	0.172477	0.14578	0.132325	0.176952	0.05359	0.107022	0.0999455	0.105174	0.0939792	0.136252			0.156003	0.235588	-0.0156266	-0.134722	-0.221822	-0.316834	-0.080825	-0.154783	-0.0922964	0.337247	-0.697149	0.997052	-0.066123	0.0523128	-0.10644	0.44981
SPAS17	0.532977	0.605254	0.615179	0.539174	0.512956	0.420963	0.428724	0.4342	0.431574	0.390428	0.443475	0.0307419	0.300009	0.31236	0.235286	0.284438	0.323301			0.135609	0.0163969	-0.123549	-0.048627	-0.179338	0.0184346	0.0127741	-0.00604793	-0.0953387	0.135868	-0.93068	8.75898	0.0411682	-0.246747	0.208901	0.136632
SPAS18	0.416726	0.488683	0.630307	0.620136	0.566688	0.490212	0.3694	0.320814	0.27894	0.263167	0.315341	0.153453	0.437999	0.468718	0.369393	0.379794	0.442843			0.172673	0.289807	-0.0161376	-0.0861866	-0.134953	-0.246448	-0.131527	-0.130526	-0.0565466	0.198256	-0.513374	1.85429	0.0701348	-0.211907	0.0281562	0.166007
SPAS19	0.319547	0.384933	0.39635	0.259492	0.247463	0.190536	0.114441	0.0942925	0.089024	0.0371156	-0.0168516	0.000914282	0.246543	0.252518	0.148856	0.268909	0.296267			0.204619	0.0296615	-0.345296	-0.0463564	-0.230043	-0.399371	-0.176063	-0.0558741	-0.583083	-1.45403	-1.05425	268.657	0.0242342	-0.410512	0.806498	0.10174
SPAS20	0.595177	0.635587	0.698418	0.648135	0.625874	0.559236	0.565559	0.554247	0.514253	0.52533	0.557724	0.37379	0.570426	0.518866	0.474063	0.480019	0.534749			0.0678951	0.0988546	-0.0719956	-0.0343463	-0.106471	0.0113065	-0.0200012	-0.0721592	0.0215389	0.0616649	-0.329795	0.526061	-0.0903875	-0.0863489	0.0125641	0.114016
SPAS21	0.540347	0.588004	0.586839	0.507737	0.454103	0.378391	0.279499	0.244064	0.207517	0.211431	0.262299	0.0870287	0.334229	0.356416	0.251603	0.271588	0.323232			0.088198	-0.0019815	-0.134793	-0.105635	-0.166727	-0.26135	-0.126779	-0.149742	0.0188585	0.240589	-0.668208	2.84045	0.0663814	-0.294073	0.0794286	0.190157
SPAS22	0.270982	0.380246	0.543358	0.610565	0.581303	0.523221	0.43391	0.392219	0.337915	0.318058	0.392297	0.131432	0.493872	0.469109	0.388962	0.438622	0.563719			0.403211	0.428966	0.123688	-0.0479261	-0.0999165	-0.170695	-0.0960825	-0.138452	-0.0587644	0.233415	-0.664968	2.75762	-0.0501401	-0.17085	0.127674	0.285202
SPAS23	0.581689	0.620989	0.67218	0.625674	0.61314	0.552727	0.55685	0.530197	0.487717	0.494035	0.535849	0.379966	0.538899	0.486555	0.480326	0.504613	0.542605			0.067562	0.0824355	-0.0691878	-0.020033	-0.0985293	0.00745826	-0.0478641	-0.08012	0.0129537	0.0846381	-0.290909	0.418282	-0.0971317	-0.0128015	0.0505629	0.075289
SPAS24	0.00419445	-0.135249	0.13349	0.176241	0.145438	0.11191	0.0615253	0.0343076	0.0213855	0.0100971	0.0547349	-0.0364106	0.0609495	0.0447502	0.0152392	0.012384	0.0581368			-33.2447	-1.987	0.320251	-0.174776	-0.230529	-0.450228	-0.442382	-0.376653	-0.527855	4.42086	-1.66522	-2.67395	-0.265782	-0.65946	-0.187361	3.69451
SPAS25	-0.0207071	-0.117069	0.267075	0.340972	0.293715	0.244755	0.1705	0.126009	0.0973033	0.0736643	0.1309	-0.0414473	0.205629	0.173031	0.099575	0.151683	0.289468			4.65358	-3.28135	0.276688	-0.138593	-0.166693	-0.303387	-0.260941	-0.227808	-0.242941	0.776974	-1.31663	-5.96121	-0.158527	-0.424525	0.523306	0.90837
SPAS26	0.54788	0.59041	0.663395	0.629785	0.617449	0.557444	0.562826	0.553932	0.516986	0.524472	0.551145	0.433946	0.577903	0.510365	0.504204	0.516977	0.548616			0.0776261	0.123617	-0.0506638	-0.0195885	-0.0971814	0.00965553	-0.0158026	-0.0666979	0.0144795	0.0508564	-0.212646	0.33174	-0.116866	-0.0120728	0.0253336	0.0611989
SPAS27	0.232096	0.342179	0.469736	0.507475	0.465277	0.391914	0.288576	0.250597	0.199002	0.200061	0.258831	-0.000268487	0.30594	0.368158	0.241029	0.252158	0.376865			0.4743	0.372781	0.0803394	-0.0831522	-0.157677	-0.263674	-0.131608	-0.205888	0.0053232	0.293756	-1.00104	-1140.5	0.203365	-0.34531	0.0461721	0.494557
SPAS28	0.441107	0.51173	0.655605	0.666899	0.628063	0.578397	0.476653	0.447275	0.392898	0.389638	0.439868	0.251138	0.51308	0.562529	0.459239	0.458614	0.567858			0.160106	0.281153	0.017228	-0.0582346	-0.0790771	-0.175908	-0.0616328	-0.121575	-0.00829666	0.128914	-0.429061	1.04302	0.096376	-0.183617	-0.00135993	0.238203
SPAS29	0.394898	0.46746	0.622586	0.680205	0.65681	0.607681	0.531471	0.498738	0.429947	0.433095	0.485428	0.295704	0.5754	0.620632	0.504476	0.514061	0.589179			0.183747	0.33185	0.0925473	-0.0343944	-0.0747992	-0.125412	-0.0615884	-0.13793	0.0073219	0.120834	-0.390838	0.945863	0.0786098	-0.187157	0.0189988	0.146126
SPAS30	0.418845	0.529029	0.686818	0.722917	0.695158	0.63419	0.540369	0.496276	0.443421	0.444862	0.520358	0.190742	0.578873	0.643788	0.545484	0.557889	0.668296			0.263065	0.298262	0.0525592	-0.038399	-0.0877031	-0.147939	-0.0815968	-0.106504	0.00324966	0.169707	-0.633441	2.03485	0.11214	-0.152697	0.0227402	0.197902
SPAS31	0.100198	0.161086	0.396963	0.441662	0.411876	0.343628	0.3413	0.324891	0.290391	0.296587	0.324693	0.203802	0.36251	0.290779	0.283793	0.306642	0.337275			0.607689	1.46429	0.112602	-0.0674407	-0.165702	-0.00677532	-0.048077	-0.10619	0.0213372	0.0947648	-0.372325	0.77874	-0.197875	-0.0240232	0.0805135	0.099897
SPAS32	0.0797486	0.1526	0.300488	0.293761	0.267963	0.224064	0.136435	0.10038	0.0740373	0.0524076	0.104292	-0.0407745	0.184388	0.204627	0.115539	0.131705	0.234368			0.913517	0.969121	-0.0223879	-0.0878209	-0.163824	-0.39109	-0.264263	-0.26243	-0.292146	0.990013	-1.39097	-5.52212	0.109765	-0.435366	0.139913	0.779499
SPAS33	0.199419	0.242254	0.343884	0.299513	0.281404	0.217966	0.227002	0.216459	0.192828	0.189891	0.220696	0.0814601	0.245615	0.2149	0.178088	0.187265	0.235797			0.214799	0.419522	-0.129031	-0.0604597	-0.225435	0.0414548	-0.0464444	-0.109167	-0.015235	0.162227	-0.630895	2.01515	-0.125054	-0.171296	0.051531	0.25916
SPAS34	0.406823	0.480481	0.545328	0.506531	0.488581	0.372015	0.373367	0.379965	0.336624	0.298065	0.345356	0.105416	0.387588	0.413678	0.336501	0.359867	0.456872			0.181054	0.134965	-0.0711447	-0.0354381	-0.238581	0.00363596	0.0176714	-0.114067	-0.114547	0.158659	-0.69476	2.67674	0.0673122	-0.186563	0.0694375	0.269559
SPAS35		-0.0285714	-0.0285714		-0.0285714	-0.0285714	-0.0285715	-0.0285715	-0.0285715	-0.0285714	-0.0285714	-0.0285716	-0.0285715	-0.0285715	-0.0285716	-0.0285714	-0.0285719			#DIV/0!	1.30868e-07	-1	#DIV/0!	-4.89595e-07	1.18101e-06	6.1233e-07	-1.04535e-06	-2.35138e-07	-2.16969e-07	4.64935e-06	-1.02058e-06	-1.73946e-06	3.30668e-06	-6.01661e-06	1.57153e-05
ESTS1	-0.258651	-0.233777	-0.30081	-0.317142	-0.367896	-0.368443	-0.336289	-0.3621	-0.401395	-0.488602	-0.432846	-0.580152	-0.489902	-0.451645	-0.557625	-0.514198	-0.45532			-0.0961677	0.286738	0.0542955	0.160035	0.00148635	-0.0872707	0.0767518	0.10852	0.217261	-0.114113	0.340319	-0.155563	-0.0780915	0.234653	-0.0778785	-0.114505
ESTS2	0.0525503	-0.00233449	0.0620284	0.16356	0.148536	0.0524103	0.0433636	-0.260788	-0.26779	-0.39618	-0.351187	-0.354889	-0.104548	0.015455	-0.201264	-0.143029	-0.249242			-1.04442	-27.5704	1.63686	-0.0918565	-0.647155	-0.172612	-7.01398	0.0268497	0.47944	-0.113567	0.0105418	-0.705407	-1.14783	-14.0226	-0.289347	0.742595
ESTS3	-0.252762	-0.21704	-0.266903	-0.276326	-0.281825	-0.275536	-0.233402	-0.22735	-0.239188	-0.293628	-0.275605	-0.262842	-0.160715	-0.232714	-0.304514	-0.177357	-0.0377784			-0.141326	0.229744	0.0353024	0.0199026	-0.0223173	-0.152915	-0.0259279	0.0520684	0.227604	-0.0613831	-0.0463082	-0.388547	0.447986	0.308536	-0.417575	-0.786992
ESTS4	-0.170825	-0.132485	-0.198026	-0.167654	-0.158193	-0.184308	-0.23811	-0.263518	-0.23763	-0.174564	-0.163791	-0.371625	-0.220124	-0.160768	-0.389708	-0.0975157	-0.088235			-0.224436	0.494701	-0.153373	-0.0564358	0.165083	0.291919	0.106704	-0.0982407	-0.265394	-0.0617125	1.26889	-0.407673	-0.269647	1.42404	-0.749772	-0.0951716
ESTS5	-0.0633911	-0.0518282	-0.0692961	-0.0678803	-0.054356	-0.0492956	-0.0641913	-0.0753463	-0.0733852	-0.0651042	-0.0607623	-0.270613	-0.0898193	-0.0633986	-0.0640349	-0.041204	-0.0510824			-0.182405	0.337034	-0.0204311	-0.199237	-0.0930971	0.302171	0.173777	-0.0260275	-0.112844	-0.0666913	3.45363	-0.668089	-0.294153	0.0100365	-0.356539	0.239743
ESTS6	-0.594266	-0.577468	-0.64435	-0.652556	-0.677624	-0.67892	-0.661194	-0.684896	-0.709353	-0.758668	-0.722268	-0.845666	-0.79526	-0.747456	-0.782248	-0.755283	-0.760415			-0.028267	0.11582	0.0127353	0.0384144	0.00191298	-0.0261094	0.0358474	0.0357089	0.0695212	-0.0479789	0.170848	-0.0596058	-0.060111	0.0465481	-0.0344717	0.00679494
ESTS7	-0.0380167	-0.162313	-0.0788294	-0.275431	-0.402084	-0.418994	-0.282615	-0.408649	-0.227513	-0.438122	-0.480681	-0.611554	-0.387986	-0.364462	-0.427533	-0.409978	-0.271782			3.26952	-0.514337	2.49401	0.459838	0.042055	-0.325491	0.445956	-0.443255	0.925699	0.0971395	0.272266	-0.365574	-0.0606308	0.173055	-0.041063	-0.337081
ESTS8	-0.18666	-0.2949	-0.234883	-0.636728	-0.651066	-0.619264	-0.262812	-0.238046	-0.233249	-0.295774	-0.309656	-0.383411	-0.254914	-0.206463	-0.221445	-0.100883	-0.270071			0.57988	-0.203517	1.71083	0.0225178	-0.0488459	-0.575606	-0.0942353	-0.0201502	0.268061	0.0469355	0.238184	-0.335141	-0.190071	0.0725695	-0.544436	1.67708
ESTS9	-0.442894	-0.567761	-0.467819	-0.516348	-0.533801	-0.556107	-0.511688	-0.576003	-0.549298	-0.524603	-0.523356	-0.352789	-0.318143	-0.33734	-0.387094	-0.470194	-0.439345			0.281934	-0.176028	0.103735	0.0338005	0.0417868	-0.0798744	0.125691	-0.0463625	-0.0449566	-0.00237831	-0.32591	-0.0982053	0.0603414	0.14749	0.214675	-0.0656087
ESTS10	-0.109957	-0.225927	-0.401597	-0.418172	-0.35536	-0.403061	-0.410874	-0.438288	-0.41517	-0.468699	-0.444345	-0.485125	-0.329845	-0.309022	-0.338109	-0.339724	-0.334448			1.05468	0.777552	0.0412729	-0.150206	0.134231	0.0193849	0.0667203	-0.0527444	0.128932	-0.0519607	0.0917747	-0.320082	-0.0631295	0.094126	0.00477474	-0.0155292
ESTS11	0.101837	-0.315226	-0.330226	-0.457259	-0.363828	-0.362094	-0.360545	-0.358643	0.0763489	-0.336628	-0.354799	-0.616542	-0.0903783	0.0285813	-0.200369	-0.131032	-0.268352			-4.0954	0.0475836	0.384686	-0.204328	-0.00476733	-0.0042773	-0.00527646	-1.21288	-5.40908	0.0539795	0.73772	-0.853411	-1.31624	-8.01048	-0.346047	1.04799
ESTS12	-0.349007	-0.455145	-0.317142	-0.513448	-0.376341	-0.414158	-0.462218	-0.344914	-0.376666	-0.47971	-0.503178	-0.763748	-0.602096	-0.610309	-0.668497	-0.70817	-0.748415			0.304115	-0.303207	0.618985	-0.267033	0.100486	0.116043	-0.253787	0.0920605	0.273568	0.0489207	0.517849	-0.211656	0.0136407	0.0953417	0.0593463	0.0568292
ESTS13	-0.619382	-0.622032	-0.510864	-0.632475	-0.610715	-0.590381	-0.541992	-0.469415	-0.438725	-0.524752	-0.468714	-0.231271	-0.611396	-0.507824	-0.467281	-0.43425	-0.141373			0.00427805	-0.178717	0.238049	-0.0344043	-0.0332959	-0.081962	-0.133907	-0.0653805	0.196086	-0.106791	-0.506583	1.64363	-0.169402	-0.0798369	-0.0706881	-0.674443
ESTS14	-0.733648	-0.700263	-0.750303	-0.851441	-0.816557	-0.841028	-0.8633	-0.872122	-0.869185	-0.881396	-0.876858	-0.562392	-0.636436	-0.663268	-0.681069	-0.712514	-0.633311			-0.0455045	0.0714583	0.134797	-0.0409712	0.0299681	0.0264826	0.0102191	-0.00336829	0.0140486	-0.00514827	-0.358628	0.131658	0.04216	0.0268389	0.0461701	-0.11116
ESTS15	-0.560237	-0.51162	-0.130597	-0.628604	-0.65609	-0.599463	-0.584279	-0.573789	-0.564744	-0.52202	-0.514444	-0.362841	-0.314212	-0.311788	-0.399807	-0.30863	-0.201942			-0.0867801	-0.744738	3.8133	0.043725	-0.0863093	-0.0253299	-0.0179538	-0.0157633	-0.0756518	-0.0145136	-0.294693	-0.134024	-0.00771401	0.282305	-0.228053	-0.345682
ESTS16	-0.272567	-0.267153	-0.271533	-0.431624	-0.403062	-0.400343	-0.40159	-0.399559	-0.374529	-0.493777	-0.504311	-0.509146	-0.464153	-0.379763	-0.555851	-0.492341	-0.455538			-0.0198629	0.016395	0.58958	-0.0661717	-0.00674629	0.00311403	-0.00505618	-0.0626455	0.318396	0.0213335	0.00958777	-0.0883705	-0.181816	0.463679	-0.114257	-0.0747518
ESTS17	-0.183336	-0.144666	0.151156	-0.0217957	-0.0333424	-0.115249	-0.127107	-0.0720518	-0.0324636	-0.230967	-0.25609	-0.389434	-0.446119	-0.395044	-0.58947	-0.559948	-0.434925			-0.210926	-2.04486	-1.14419	0.529767	2.45654	0.102891	-0.433143	-0.549441	6.11463	0.108774	0.520695	0.145555	-0.114487	0.492164	-0.050082	-0.223277
ESTS18	-0.0505916	-0.423792	-0.423703	-0.42652	-0.388012	-0.478699	-0.484586	-0.47732	0.105169	-0.448465	-0.469027	-0.440276	0.0386293	0.20399	-0.14126	-0.0236028	-0.313357			7.37673	-0.000208897	0.00664771	-0.0902836	0.233722	0.0122965	-0.0149933	-1.22033	-5.26422	0.0458504	-0.0612989	-1.08774	4.2807	-1.69249	-0.832913	12.2763
ESTS19	-0.35633	-0.304769	-0.0859277	-0.264089	-0.269911	-0.32294	-0.319189	-0.276369	-0.231488	-0.41007	-0.413822	-0.276534	-0.0493602	-0.0156945	-0.167392	-0.0960731	-0.218226			-0.144698	-0.718057	2.07339	0.0220459	0.196468	-0.0116156	-0.134153	-0.162394	0.771449	0.0091498	-0.331755	-0.821504	-0.682042	9.66567	-0.42606	1.27146
ESTS20	-0.315856	-0.289819	-0.3383	-0.337876	-0.389829	-0.3852	-0.386764	-0.41489	-0.442135	-0.514124	-0.388703	-0.481981	-0.419119	-0.42159	-0.552744	-0.520153	-0.478715			-0.0824324	0.167281	-0.00125209	0.153763	-0.011876	0.00405978	0.0727218	0.0656692	0.16282	-0.24395	0.239973	-0.130425	0.00589468	0.311094	-0.0589618	-0.0796649
ESTS21	-0.0646454	-0.242604	-0.240134	-0.209849	-0.18225	-0.297935	-0.289497	-0.273925	-0.140233	-0.259026	-0.303884	-0.289403	-0.0849909	-0.0316175	-0.165833	-0.1253	-0.175368			2.75285	-0.0101836	-0.126118	-0.131514	0.634754	-0.0283192	-0.0537908	-0.488061	0.847111	0.173182	-0.0476527	-0.706324	-0.627989	4.24497	-0.244421	0.39959
ESTS22	-0.0950082	-0.109955	-0.11434	-0.0752173	-0.0877536	-0.119712	-0.102318	-0.0876538	-0.13628	-0.168546	-0.190498	-0.0666016	0.0632546	-0.021202	-0.301339	-0.271092	0.140756			0.157316	0.0398812	-0.342159	0.166667	0.364182	-0.145295	-0.143323	0.554748	0.236766	0.130245	-0.650382	-1.94975	-1.33519	13.2127	-0.100376	-1.51922
ESTS23	-0.406634	-0.34068	-0.0216055	-0.298673	-0.293254	-0.359608	-0.345781	-0.294294	-0.237671	-0.482115	-0.478529	-0.256684	-0.13909	-0.247596	-0.41879	-0.371908	-0.377717			-0.162195	-0.936581	12.824	-0.0181435	0.226268	-0.0384499	-0.148901	-0.192402	1.02849	-0.00743686	-0.463597	-0.458128	0.780112	0.691427	-0.111946	0.0156208
ESTS24	-0.535786	-0.562607	-0.650354	-0.420017	-0.4129	-0.448255	-0.437657	-0.414316	-0.387114	-0.508085	-0.508091	-0.532973	-0.505847	-0.352483	-0.405527	-0.476711	-0.186996			0.0500593	0.155966	-0.354172	-0.0169452	0.0856265	-0.0236428	-0.0533308	-0.0656568	0.312495	1.31804e-05	0.048971	-0.0508955	-0.303182	0.150486	0.175533	-0.607737
ESTS25	-0.0990099	-0.109862	-0.114881	-0.0820925	-0.0893498	-0.112226	-0.102202	-0.0915385	-0.119918	-0.13068	-0.194533	-0.161314	-0.114346	-0.0629	-0.222437	-0.199924	-0.194677			0.109609	0.045684	-0.285414	0.0884033	0.256033	-0.089322	-0.104337	0.310023	0.0897454	0.488628	-0.170764	-0.291159	-0.449915	2.53637	-0.101214	-0.0262441
ESTS26	-0.647782	-0.597559	-0.281858	-0.547781	-0.541284	-0.594823	-0.569493	-0.539584	-0.491653	-0.709079	-0.722811	-0.48919	-0.165019	-0.494128	-0.408868	-0.569227	-0.28522			-0.0775309	-0.528317	0.943461	-0.0118606	0.0989129	-0.0425848	-0.0525189	-0.0888297	0.442235	0.019366	-0.323211	-0.662668	1.99436	-0.172546	0.392201	-0.498935
ESTS27	-0.0666682	-0.0940351	-0.0922149	-0.0386558	-0.0606591	-0.109392	-0.0854508	-0.0696903	-0.131512	-0.168579	-0.130476	-0.281548	-0.208432	-0.0676984	-0.244856	-0.220284	-0.0285945			0.410494	-0.0193562	-0.580808	0.569213	0.803392	-0.218858	-0.18444	0.887096	0.281854	-0.226028	1.15786	-0.259694	-0.675201	2.61686	-0.100352	-0.870192
ESTS28	0.0238419	0.0466135	0.0728483	0.0978017	0.07629	0.0125002	0.0349414	0.0795043	-0.00716303	-0.0805061	-0.162046	-0.188473	0.128197	0.105032	-0.178298	-0.151924	0.00383336			0.955111	0.562817	0.342539	-0.219952	-0.836149	1.79527	1.27536	-1.0901	10.2391	1.01284	0.163083	-1.68019	-0.180703	-2.69756	-0.147919	-1.02523
ESTS29	-0.0482887	0.011691	0.199796	0.127573	0.124214	0.0475497	0.0757746	0.146522	0.096438	-0.0734242	-0.147494	-0.208174	0.23618	0.221615	-0.131765	-0.0992215	0.0311579			-1.24211	16.0897	-0.361484	-0.0263296	-0.617196	0.593587	0.933651	-0.341817	-1.76136	1.0088	0.411406	-2.13453	-0.0616688	-1.59456	-0.246979	-1.31402
ESTS30	0.119454	0.049337	0.0667901	0.137437	0.0885015	0.00359593	0.0484958	0.0872529	-0.0655771	-0.13629	-0.0861866	-0.0359873	0.130553	0.0985177	-0.384697	-0.348146	0.200246			-0.586979	0.353753	1.05775	-0.356058	-0.959369	12.4863	0.799183	-1.75158	1.07831	-0.367623	-0.58245	-4.62777	-0.245384	-4.90485	-0.0950124	-1.57518
ESTS31	-0.09385	-0.099565	-0.107369	-0.0825154	-0.085159	-0.0983863	-0.089935	-0.0845683	-0.109604	-0.117919	-0.186407	-0.12539	-0.0581514	-0.0983293	-0.233544	-0.21035	-0.0317537			0.0608951	0.0783846	-0.23148	0.0320367	0.155326	-0.0858998	-0.0596725	0.296035	0.0758703	0.580802	-0.327333	-0.536234	0.690919	1.37512	-0.0993128	-0.849043
ESTS32	-0.0656549	-0.0675326	-0.0721506	-0.054079	-0.051381	-0.0646469	-0.0667659	-0.0647243	-0.0782221	-0.0877053	-0.147249	-0.0675221	-0.040453	-0.0763748	-0.146483	-0.129874	-0.0403659			0.0285996	0.0683817	-0.250471	-0.0498898	0.258187	0.0327789	-0.0305796	0.208543	0.121234	0.678902	-0.541441	-0.400893	0.887989	0.917954	-0.11339	-0.689191
ESTS33	-0.044601	-0.0466896	-0.0554305	-0.0423844	-0.0401621	-0.0448247	-0.0411575	-0.0401628	-0.0511657	-0.0561553	-0.0922704	-0.18634	-0.164977	-0.0549853	-0.0766755	-0.0741309	-0.0409603			0.046828	0.187213	-0.235359	-0.0524318	0.116094	-0.081812	-0.0241693	0.273958	0.0975188	0.643129	1.0195	-0.114643	-0.666709	0.394472	-0.0331866	-0.44746
ESTS34	-0.175342	-0.220711	-0.11503	-0.0878886	-0.200192	-0.34111	-0.132584	-0.0708366	-0.135987	-0.195284	-0.493891	-0.486103	-0.0267359	-0.0722219	-0.273297	-0.246215	0.0089489			0.258749	-0.478821	-0.235951	1.2778	0.703909	-0.611314	-0.465725	0.919732	0.436049	1.52909	-0.0157686	-0.944999	1.7013	2.78412	-0.0990912	-1.03635
ESTS35																				#DIV/0!	#DIV/0!	#DIV/0!	#DIV/0!	#DIV/0!	#DIV/0!	#DIV/0!	#DIV/0!	#DIV/0!	#DIV/0!	#DIV/0!	#DIV/0!	#DIV/0!	#DIV/0!	#DIV/0!	#DIV/0!
FINS1	-0.228184	-0.206506	-0.119141	-0.151668	-0.0622701	-0.0282491	-0.0620658	-0.071054	-0.210883	-0.178143	-0.224253	0.187227	0.101924	0.246356	0.186106	0.258666	0.428015			-0.0950048	-0.423065	0.273022	-0.589433	-0.546345	1.19709	0.144817	1.96793	-0.155252	0.258834	-1.83489	-0.455614	1.41706	-0.244567	0.389888	0.654698
FINS2	-0.118439	0.00407871	0.02063	0.00125698	-0.0233837	-0.0139698	-0.141096	-0.0640837	-0.113995	-0.116862	-0.190924	0.155633	0.00479233	-0.0927193	-0.230922	-0.216777	-0.0568989			-1.03444	4.05798	-0.93907	-19.6031	-0.402582	9.10003	-0.545815	0.778848	0.0251527	0.633749	-1.81516	-0.969207	-20.3474	1.49055	-0.0612527	-0.737524
FINS3	-0.0205268	0.040057	0.0818494	-0.00534752	0.0764654	0.0887723	0.0913861	0.115351	0.000891675	0.0344983	0.0116656	-0.0730123	0.204658	0.303928	0.00402297	0.00655059	0.354603			-2.95145	1.04332	-1.06533	-15.2992	0.160947	0.029444	0.262242	-0.99227	37.6893	-0.66185	-7.25876	-3.80306	0.485051	-0.986763	0.628297	53.1331
FINS4	-0.056359	-0.0408168	-0.0373862	-0.147858	-0.147649	-0.155528	-0.154451	-0.129396	-0.147627	-0.177228	-0.119935	-0.0573409	-0.037854	-0.0468081	-0.0613954	-0.0588937	-0.0297372			-0.275771	-0.0840495	2.95487	-0.00141434	0.0533669	-0.00692226	-0.162224	0.140898	0.200508	-0.323274	-0.521899	-0.339843	0.236543	0.31164	-0.0407486	-0.495069
FINS5	-0.0444199	-0.0436039	-0.0419201	-0.0461139	-0.0501519	-0.0506639	-0.0480627	-0.0465819	-0.0449314	-0.0485204	-0.0441851	-0.050075	-0.0391865	-0.0447922	-0.050264	-0.04988	-0.0344689			-0.018372	-0.0386146	0.100042	0.0875646	0.0102093	-0.0513417	-0.0308101	-0.0354323	0.0798778	-0.0893506	0.133302	-0.217444	0.143051	0.12216	-0.00764148	-0.308963
FINS6	0.260906	0.351958	0.391601	0.335977	0.339276	0.226095	0.173894	0.0321395	0.0763006	-0.00212045	-0.0247157	0.0556247	0.477414	0.426311	0.230048	0.214934	0.484087			0.348986	0.112634	-0.142041	0.0098183	-0.333596	-0.23088	-0.815178	1.37404	-1.02779	10.6559	-3.25058	7.58277	-0.107041	-0.460377	-0.0656983	1.25226
FINS7	-0.678481	-0.646794	-0.618631	-0.684058	-0.641943	-0.619252	-0.635257	-0.642628	-0.688844	-0.66788	-0.703624	-0.442783	-0.486912	-0.346049	-0.443167	-0.343394	0.0291998			-0.0467017	-0.0435435	0.105761	-0.061566	-0.0353472	0.0258447	0.0116032	0.0719181	-0.0304346	0.0535196	-0.370712	0.0996638	-0.289298	0.280647	-0.225136	-1.08503
FINS8	-0.155048	-0.117471	-0.115458	-0.186087	-0.145582	-0.147887	-0.273431	-0.226129	-0.21109	-0.210767	-0.303448	-0.0791524	-0.124281	-0.0931323	-0.253745	-0.392499	-0.269088			-0.242357	-0.0171346	0.611729	-0.217664	0.0158334	0.84891	-0.172992	-0.0665072	-0.00152788	0.439727	-0.739156	0.570144	-0.25063	1.72457	0.546825	-0.314424
FINS9	-0.421484	-0.395375	-0.382752	-0.383772	-0.376682	-0.369191	-0.388067	-0.404146	-0.466349	-0.450007	-0.47669	-0.206382	-0.465474	-0.381903	-0.4125	-0.434789	-0.260399			-0.0619449	-0.0319268	0.00266587	-0.0184757	-0.0198859	0.0511268	0.0414359	0.153911	-0.0350414	0.0592928	-0.567052	1.2554	-0.179539	0.0801159	0.0540342	-0.401092
FINS10	0.0530826	0.154758	0.17667	0.0822098	0.113563	0.0177474	-0.00719251	0.0453025	0.0522908	0.0171627	0.0697562	-0.10196	0.244919	0.18721	-0.0115812	-0.0203072	0.245802			1.91542	0.141589	-0.534671	0.381378	-0.843722	-1.40527	-7.29856	0.15426	-0.671783	3.0644	-2.46167	-3.4021	-0.235622	-1.06186	0.753465	-13.1042
FINS11	0.181735	0.27641	0.320658	0.259951	0.269709	0.16073	0.15263	0.215768	0.225292	0.18628	0.249198	-0.0150428	0.413381	0.352034	0.113145	0.102508	0.361791			0.520949	0.160079	-0.189319	0.037537	-0.404062	-0.0503963	0.413674	0.0441393	-0.173161	0.337759	-1.06036	-28.4802	-0.148404	-0.678597	-0.0940131	2.5294
FINS12	-0.377261	-0.354524	0.238481	-0.230469	-0.206791	-0.211252	-0.321405	-0.384544	-0.403269	-0.414395	-0.481122	-0.392889	-0.311392	-0.34708	-0.496439	-0.54201	-0.282786			-0.0602679	-1.67268	-1.9664	-0.10274	0.021574	0.52143	0.196446	0.0486948	0.02759	0.161021	-0.183389	-0.207431	0.11461	0.43033	0.0917941	-0.478263
FINS13	-0.158783	-0.103419	-0.0499239	-0.275833	-0.284309	-0.236861	-0.267963	-0.269855	-0.378112	-0.345578	-0.37613	-0.114724	-0.051698	0.113953	0.00625396	-0.0368195	0.1005			-0.348675	-0.517266	4.52507	0.0307274	-0.166889	0.13131	0.00706038	0.401169	-0.0860426	0.0884072	-0.694988	-0.549371	-3.20421	-0.945118	-6.88739	-3.72953
FINS14	-0.263195	0.134971	0.199681	-0.263073	0.00413768	-0.1557	-0.144793	-0.033056	-0.0496573	-0.102699	-0.0311938	-0.233932	0.163652	-0.518732	-0.788067	-0.834551	-0.112518			-1.51282	0.479438	-2.31747	-1.01573	-38.6299	-0.0700511	-0.771702	0.502217	1.06816	-0.696261	6.49929	-1.69957	-4.16972	0.519219	0.0589842	-0.865176
FINS15	-0.186515	-0.123641	-0.0973644	-0.162918	-0.166371	-0.15978	-0.163529	-0.139916	-0.198982	-0.401248	-0.408355	-0.0755033	-0.0785295	-0.0404244	-0.0768409	-0.0821704	-0.0364753			-0.337101	-0.212521	0.673284	0.0211918	-0.0396147	0.0234654	-0.144398	0.422153	1.01651	0.0177111	-0.815104	0.0400804	-0.485233	0.900855	0.069358	-0.556102
FINS16	-0.0229755	0.0349392	0.0148063	-0.0482038	-0.0183333	-0.0602661	-0.0582326	-0.0382954	-0.0418236	-0.0585667	-0.0341708	-0.0881608	0.0982025	0.0422335	-0.0588915	-0.0638966	0.0842477			-2.52072	-0.576227	-4.25563	-0.619671	2.28725	-0.0337422	-0.342372	0.0921319	0.400326	-0.416548	1.58	-2.1139	-0.569934	-2.39443	0.0849888	-2.3185
FINS17	-0.399558	-0.376144	-0.261651	-0.353072	-0.329583	-0.267531	-0.268557	-0.253117	-0.347412	-0.316476	-0.36056	-0.0583221	-0.176353	0.00598237	-0.131965	-0.0186184	0.146084			-0.0586012	-0.304384	0.349398	-0.0665278	-0.188273	0.00383295	-0.0574918	0.372536	-0.0890464	0.139296	-0.838246	2.02378	-1.03392	-23.059	-0.858915	-8.84623
FINS18	0.182907	0.277513	0.382896	0.32583	0.325026	0.221214	0.228457	0.311823	0.326308	0.279739	0.338628	-0.000575697	0.47943	0.438796	0.174273	0.140271	0.416788			0.517232	0.379742	-0.149038	-0.0024685	-0.319395	0.0327399	0.364912	0.0464505	-0.142714	0.210515	-1.0017	-833.782	-0.084755	-0.602838	-0.19511	1.97131
FINS19	-0.184236	-0.153286	-0.151787	-0.275784	-0.260811	-0.216503	-0.239495	-0.250493	-0.325413	-0.307118	-0.338933	-0.0397374	-0.144354	-0.0242435	-0.110443	-0.0380384	0.164077			-0.167994	-0.0097755	0.816911	-0.0542916	-0.169888	0.106198	0.045924	0.299091	-0.0562206	0.103591	-0.882757	2.6327	-0.832055	3.55558	-0.655584	-5.31345
FINS20	-0.17233	-0.128584	-0.00521023	-0.0628193	0.0319166	0.091558	0.0878431	0.100973	-0.0638574	-0.0130949	-0.0619517	-0.0439064	0.281474	0.286173	0.0694002	0.00483991	0.117266			-0.253851	-0.95948	11.0569	-1.50807	1.86867	-0.0405746	0.149471	-1.63242	-0.794934	3.73097	-0.291281	-7.41078	0.0166941	-0.757488	-0.930261	23.229
FINS21	0.0134099	0.0473343	0.127119	0.0692953	0.0798837	-0.00564827	-0.0200892	0.0267693	0.064607	0.0272715	0.0888686	-0.139933	0.253966	0.197985	-0.0241485	-0.0428458	0.191286			2.52981	1.68556	-0.454878	0.152801	-1.07071	2.55671	-2.33252	1.41347	-0.577886	2.25866	-2.57461	-2.81491	-0.220429	-1.12197	0.774262	-5.46451
FINS22	-0.145269	-0.0882783	0.0404464	0.106846	0.0570604	-0.00732429	-0.00560728	0.0500865	0.0562357	0.0229519	0.0671309	-0.127277	0.194632	0.123821	-0.0533069	-0.0784781	0.185652			-0.39231	-1.45817	1.64166	-0.465955	-1.12836	-0.234427	-9.9324	0.122773	-0.591863	1.92486	-2.89595	-2.5292	-0.363821	-1.43052	0.472196	-3.36565
FINS23	-0.301118	-0.27451	-0.267229	-0.402146	-0.382007	-0.335435	-0.361899	-0.378493	-0.456227	-0.43511	-0.473095	-0.174198	-0.27972	-0.156178	-0.250085	-0.167641	0.101533			-0.088364	-0.0265244	0.504877	-0.05008	-0.121914	0.0788965	0.0458513	0.205378	-0.0462853	0.0872989	-0.63179	0.605758	-0.441662	0.601275	-0.329664	-1.60566
FINS24	-0.159462	-0.396018	-0.108461	-0.125017	-0.0937113	-0.0658906	-0.0827521	-0.0792308	-0.132078	-0.123033	-0.112853	-0.091547	-0.359727	-0.357156	-0.424469	-0.516481	-0.0414364			1.48346	-0.72612	0.152646	-0.250414	-0.296876	0.255901	-0.0425518	0.667001	-0.0684781	-0.0827423	-0.188797	2.92942	-0.00714454	0.188469	0.21677	-0.919772
FINS25	-0.0237432	-0.0186015	0.0108143	-0.084483	-0.0675513	-0.14696	-0.143589	-0.140631	-0.208652	-0.111819	-0.0540815	-0.193938	0.0742893	-0.0364822	-0.0934183	-0.126533	0.0881319			-0.216555	-1.58137	-8.81218	-0.200416	1.17554	-0.0229387	-0.020604	0.483691	-0.464089	-0.516348	2.58602	-1.38306	-1.49108	1.56066	0.354478	-1.69651
FINS26	-0.2995	-0.310898	-0.290723	-0.396659	-0.384123	-0.345806	-0.367256	-0.372735	-0.442172	-0.417141	-0.453089	-0.193425	-0.254565	-0.136564	-0.235148	-0.150049	0.115121			0.0380547	-0.0648912	0.364389	-0.0316063	-0.0997521	0.0620294	0.0149209	0.18629	-0.0566106	0.0861772	-0.573098	0.316095	-0.463541	0.721893	-0.361895	-1.76722
FINS27	0.0199634	0.0629516	0.135657	-0.0408998	-0.029156	-0.152435	-0.144637	-0.0480379	-0.0404902	-0.0902151	-0.0151866	-0.238697	0.206935	0.13274	-0.1649	-0.177204	0.146992			2.15335	1.15493	-1.3015	-0.287137	4.22828	-0.051162	-0.667871	-0.15712	1.22807	-0.831662	14.7176	-1.86694	-0.358543	-2.24228	0.0746125	-1.82951
FINS28	0.00183226	0.0879776	0.266244	0.215392	0.190635	0.0859272	0.0921635	0.202269	0.220837	0.172759	0.23113	-0.0923279	0.378965	0.321084	0.00558699	-0.0253075	0.285106			47.0159	2.02627	-0.190999	-0.114941	-0.549257	0.0725762	1.19468	0.0917977	-0.217709	0.337879	-1.39946	-5.10456	-0.152735	-0.9826	-5.52971	-12.2657
FINS29	0.00357353	0.125616	0.290118	0.211893	0.234141	0.103272	0.115684	0.225509	0.249273	0.194865	0.266778	-0.0994913	0.449924	0.397263	0.0129581	-0.0270734	0.353566			34.1517	1.30957	-0.269631	0.104995	-0.558931	0.120185	0.949351	0.105382	-0.218267	0.369037	-1.37294	-5.52225	-0.117046	-0.967382	-3.08931	-14.0595
FINS30	0.277433	0.336704	0.397446	0.159692	0.213709	-0.0413703	-0.0404566	0.173565	0.169305	0.0799787	0.190714	-0.289474	0.534632	0.451545	-0.0852448	-0.142467	0.479508			0.213641	0.180402	-0.598204	0.338254	-1.19358	-0.0220869	-5.29014	-0.0245397	-0.527607	1.38457	-2.51784	-2.8469	-0.155409	-1.18878	0.671265	-4.36576
FINS31	-0.0032002	0.0421838	0.12574	-0.0412848	-0.0176721	-0.145905	-0.133337	-0.0169861	-0.0131608	-0.0704913	0.0135181	-0.242921	0.273879	0.197534	-0.155216	-0.174074	0.20697			-14.1816	1.98077	-1.32833	-0.571945	7.25619	-0.086135	-0.872608	-0.225203	4.35616	-1.19177	-18.97	-2.12744	-0.278754	-1.78577	0.1215	-2.18898
FINS32	-0.0791584	-0.051726	0.0415506	-0.20888	-0.0586121	-0.133882	-0.12888	-0.0633551	-0.0406221	-0.0604854	-0.0668933	-0.137086	0.0147739	-0.221217	-0.381596	-0.422463	-0.0919174			-0.346551	-1.80328	-6.02712	-0.719398	1.2842	-0.0373643	-0.508416	-0.358819	0.488978	0.105942	1.04932	-1.10777	-15.9735	0.72499	0.107093	-0.782425
FINS33	-0.0495778	-0.0351874	-0.00178288	-0.0851523	-0.0715379	-0.112296	-0.110323	-0.0748579	-0.0758844	-0.098987	-0.0588627	-0.119783	0.0537883	0.00124759	-0.111604	-0.115424	0.0179287			-0.29026	-0.949332	46.7612	-0.159883	0.569739	-0.0175679	-0.321466	0.013712	0.304445	-0.40535	1.03496	-1.44905	-0.976806	-90.4558	0.0342263	-1.15533
FINS34	-0.257104	-0.232714	0.193471	-0.142829	-0.110328	-0.118572	-0.164851	-0.203788	-0.219299	-0.222014	-0.259599	-0.167114	-0.0746276	-0.113855	-0.277554	-0.318288	-0.134887			-0.0948653	-1.83137	-1.73825	-0.227554	0.0747216	0.390306	0.236198	0.0761124	0.0123792	0.169293	-0.35626	-0.553434	0.525636	1.4378	0.146759	-0.576209
FINS35	-0.0291279	-0.0297427	-0.0285714	-0.0285869	-0.0285714	-0.0317768	-0.0336066	-0.0290167	-0.0324691	-0.0349015	-0.0324635	-0.037543	-0.0548072	-0.0430195	-0.0386136	-0.0335561	-0.0297643			0.0211042	-0.0393781	0.000539369	-0.000539511	0.112187	0.0575846	-0.136579	0.118982	0.0749134	-0.0698536	0.156467	0.459851	-0.215076	-0.102416	-0.130976	-0.112998
FRAS1	0.691159	0.686085	0.735873	0.684376	0.6391	0.655532	0.643165	0.624306	0.604585	0.622948	0.54426	0.537675	0.550786	0.552059	0.469283	0.462423	0.642227			-0.00734105	0.0725683	-0.0699803	-0.0661564	0.0257108	-0.018865	-0.0293223	-0.0315897	0.030374	-0.126316	-0.0120991	0.0243856	0.00231113	-0.14994	-0.0146186	0.388829
FRAS2	0.271203	0.268052	0.421661	0.372494	0.270604	0.247951	0.233568	0.186616	0.147483	0.0755568	0.0536172	-0.0963492	-0.296428	-0.387029	-0.348952	-0.258045	0.140895			-0.0116186	0.57306	-0.116603	-0.273534	-0.0837142	-0.0580071	-0.201018	-0.209699	-0.487692	-0.290373	-2.79698	2.0766	0.305642	-0.0983838	-0.260512	-1.54601
FRAS3	0.59928	0.598169	0.67335	0.639159	0.610764	0.577112	0.567639	0.539083	0.529334	0.547844	0.453222	0.440186	0.468668	0.434145	0.339234	0.364811	0.585985			-0.00185406	0.125684	-0.0507773	-0.0444247	-0.0550994	-0.0164132	-0.0503069	-0.0180854	0.0349683	-0.172717	-0.0287621	0.0647054	-0.0736638	-0.218616	0.0753994	0.606269
FRAS4	-0.267111	-0.244765	-0.218483	-0.209747	-0.213687	-0.221895	-0.232522	-0.163083	-0.236143	-0.239828	-0.173777	-0.171173	-0.191127	-0.241183	-0.197845	-0.173205	-0.204571			-0.0836575	-0.107378	-0.0399826	0.0187824	0.0384152	0.0478896	-0.298633	0.447992	0.0156062	-0.275411	-0.0149851	0.11657	0.261902	-0.179688	-0.124542	0.181087
FRAS5	-0.0435869	-0.0409266	-0.043252	-0.0488892	-0.0384084	-0.0370077	-0.0388787	-0.0382255	-0.0392734	-0.0397136	-0.0357144	-0.0500327	-0.0469337	-0.0389805	-0.0613548	-0.0513747	-0.0427369			-0.0610352	0.0568181	0.130333	-0.214379	-0.0364668	0.0505568	-0.0168014	0.0274134	0.0112084	-0.100701	0.400912	-0.0619407	-0.169455	0.573986	-0.162663	-0.168133
FRAS6	0.410505	0.404218	0.479339	0.425463	0.381585	0.322511	0.315173	0.285908	0.269808	0.252705	0.143772	0.107171	0.126167	0.116111	0.0611345	0.0447243	0.197068			-0.0153154	0.185843	-0.112397	-0.10313	-0.154811	-0.0227549	-0.0928531	-0.0563115	-0.0633903	-0.431066	-0.254578	0.177244	-0.0796989	-0.473484	-0.268427	3.40627
FRAS7	0.596283	0.599986	0.650294	0.579525	0.533476	0.458595	0.444153	0.411928	0.397321	0.46891	0.355554	0.383746	0.408104	0.417241	0.275494	0.263718	0.518351			0.00620989	0.0838491	-0.108826	-0.0794602	-0.140364	-0.0314921	-0.0725552	-0.0354598	0.18018	-0.241744	0.0792916	0.0634743	0.0223873	-0.339724	-0.042744	0.965547
FRAS8	0.373656	0.401889	0.435915	0.43745	0.45031	0.424179	0.372362	0.340414	0.282234	0.133489	0.0436974	0.181639	0.205186	0.113744	0.1281	0.168984	0.328985			0.0755603	0.0846654	0.00352041	0.0293983	-0.0580291	-0.12216	-0.0857979	-0.17091	-0.527028	-0.672651	3.15675	0.129635	-0.445653	0.126212	0.319158	0.946842
FRAS9	-0.0925275	-0.120657	0.19525	0.184622	0.165024	0.0633305	0.0206474	0.00186595	-0.106918	-0.137607	-0.373113	-0.358036	0.212901	-0.186544	-0.116142	0.147037	0.14196			0.304015	-2.61822	-0.054434	-0.106152	-0.616234	-0.673974	-0.909628	-58.2993	0.287038	1.71144	-0.0404098	-1.59464	-1.8762	-0.377401	-2.266	-0.034524
FRAS10	0.216827	0.316069	0.367364	0.254867	0.239199	0.206205	0.146677	0.130166	-0.00220022	0.0461035	-0.0347114	-0.0964297	-0.00253415	0.172481	0.0923635	0.0682373	0.230359			0.4577	0.162291	-0.306227	-0.0614754	-0.137933	-0.288687	-0.112563	-1.0169	-21.9541	-1.7529	1.77804	-0.97372	-69.0626	-0.464499	-0.261209	2.37585
FRAS11	0.542068	0.536195	0.605598	0.546891	0.513426	0.461703	0.45543	0.428561	0.400684	0.442588	0.326507	0.335645	0.356269	0.350452	0.257164	0.2353	0.416841			-0.0108341	0.129437	-0.0969413	-0.0611907	-0.100742	-0.0135858	-0.0589978	-0.0650483	0.104582	-0.262277	0.0279872	0.0614449	-0.0163265	-0.266194	-0.0850203	0.771532
FRAS12	0.193268	0.215032	0.451884	0.382434	0.31057	0.3869	0.369875	0.358861	0.25404	0.270028	0.14469	0.0481234	0.136342	0.322436	0.32013	0.271951	0.34962			0.112612	1.10147	-0.15369	-0.187914	0.245774	-0.0440021	-0.0297789	-0.292093	0.062934	-0.464165	-0.667404	1.83317	1.36491	-0.00715387	-0.150496	0.285599
FRAS13	0.132387	0.238798	0.320711	0.1828	0.164478	0.119862	0.0168716	-0.0106831	-0.110732	-0.107983	-0.271136	-0.289406	-0.194314	0.0409346	0.198038	0.0693282	0.198123			0.803791	0.343022	-0.430015	-0.10023	-0.271262	-0.859241	-1.6332	9.36514	-0.0248258	1.51092	0.0673826	-0.328577	-1.21066	3.83791	-0.649924	1.85775
FRAS14	-0.581491	-0.505439	-0.452504	-0.539966	-0.56223	-0.482987	-0.493059	-0.483309	-0.421002	-0.42987	-0.350476	-0.459991	-0.378185	-0.626025	-0.712188	-0.683026	-0.412125			-0.130788	-0.104731	0.193285	0.041232	-0.140945	0.0208539	-0.0197749	-0.128916	0.0210646	-0.184694	0.312475	-0.177844	0.65534	0.137635	-0.0409469	-0.396619
FRAS15	-0.499272	-0.44341	-0.418492	-0.49248	-0.472205	-0.496025	-0.553097	-0.54326	-0.536447	-0.537464	-0.568684	-0.664623	-0.610605	-0.634666	-0.561013	-0.51777	-0.484812			-0.111886	-0.0561955	0.176795	-0.0411677	0.0504434	0.115059	-0.0177859	-0.0125407	0.0018958	0.0580864	0.168704	-0.0812758	0.0394058	-0.11605	-0.0770798	-0.063654
FRAS16	0.191299	0.179968	0.191096	0.165472	0.127685	0.0910703	0.0836641	0.0680003	0.0804016	0.0662234	0.0231614	0.0134971	0.0329293	0.03927	-0.137232	-0.168861	0.0595849			-0.0592308	0.061834	-0.13409	-0.228358	-0.28676	-0.081324	-0.187222	0.182371	-0.176342	-0.650253	-0.417258	1.43973	0.192553	-4.49459	0.230477	-1.35286
FRAS17	0.490043	0.506742	0.56026	0.460507	0.426684	0.436414	0.431483	0.396664	0.364273	0.403663	0.335463	0.352193	0.380771	0.387718	0.271628	0.320982	0.57999			0.0340761	0.105613	-0.178047	-0.073449	0.0228045	-0.0112995	-0.0806948	-0.0816599	0.108134	-0.168953	0.0498716	0.0811429	0.0182446	-0.299418	0.181697	0.806924
FRAS18	0.50082	0.503611	0.602238	0.537153	0.493652	0.435732	0.435195	0.409406	0.377777	0.416498	0.273324	0.301042	0.326726	0.32385	0.205354	0.172524	0.373507			0.0055732	0.195839	-0.108072	-0.0809853	-0.117329	-0.00123232	-0.0592597	-0.0772551	0.102496	-0.343757	0.101412	0.0853165	-0.00880148	-0.365899	-0.159868	1.16496
FRAS19	0.270032	0.266326	-0.0585214	-0.171919	-0.238744	-0.339518	-0.372902	-0.358337	-0.358332	-0.365063	-0.383569	-0.486104	-0.422937	-0.338303	-0.155929	-0.221592	-0.103431			-0.0137239	-1.21974	1.93771	0.388702	0.4221	0.0983291	-0.0390597	-1.31482e-05	0.0187861	0.0506924	0.267316	-0.129945	-0.200111	-0.539083	0.421103	-0.533236
FRAS20	0.570244	0.604898	0.690676	0.673403	0.662246	0.624039	0.612282	0.585646	0.562781	0.574467	0.491597	0.437483	0.484558	0.530683	0.417188	0.363256	0.572502			0.0607709	0.141806	-0.0250085	-0.0165678	-0.0576938	-0.0188391	-0.0435034	-0.0390418	0.0207648	-0.144257	-0.110078	0.107604	0.0951897	-0.213865	-0.129274	0.576026
FRAS21	0.38613	0.468668	0.470587	0.275301	0.229691	0.179857	0.173343	0.153052	0.149444	0.0427948	0.0933905	-0.0389557	0.0269362	0.122199	0.0521248	0.0508982	0.174287			0.213757	0.00409363	-0.414983	-0.165674	-0.216961	-0.0362162	-0.117059	-0.0235712	-0.713641	1.18229	-1.41713	-1.69146	3.53659	-0.573442	-0.0235307	2.42422
FRAS22	0.450749	0.448631	0.611424	0.608127	0.580599	0.535248	0.524732	0.486935	0.483674	0.529309	0.433547	0.420864	0.448883	0.395591	0.270497	0.308484	0.556603			-0.00469914	0.362868	-0.00539221	-0.0452679	-0.0781103	-0.0196469	-0.0720314	-0.00669595	0.0943511	-0.180919	-0.0292539	0.0665734	-0.118721	-0.31622	0.140435	0.804316
FRAS23	0.531383	0.557893	0.637549	0.621788	0.614336	0.570332	0.554398	0.537067	0.510644	0.513621	0.442967	0.395048	0.427475	0.462868	0.350016	0.32145	0.505661			0.0498892	0.142779	-0.0247207	-0.0119845	-0.0716293	-0.0279371	-0.0312619	-0.049198	0.00583026	-0.137561	-0.108177	0.0820826	0.0827952	-0.24381	-0.0816131	0.573064
FRAS24	-0.286407	-0.357268	-0.303739	-0.378413	-0.351965	-0.363929	-0.38397	-0.331984	-0.368337	-0.372609	-0.332152	-0.373601	-0.24202	-0.292751	-0.338785	-0.233293	-0.271042			0.247412	-0.149828	0.24585	-0.0698924	0.0339933	0.0550667	-0.135391	0.109505	0.0115961	-0.108577	0.124788	-0.352196	0.209613	0.157248	-0.311385	0.161812
FRAS25	0.227325	0.208696	0.201234	0.129831	0.123163	0.0781436	-0.137797	-0.16807	0.024082	0.0815462	-0.0351116	-0.306017	-0.243375	0.0114005	-0.0106479	-0.0178941	0.0421211			-0.08195	-0.0357556	-0.354827	-0.0513542	-0.365529	-2.76339	0.219691	-1.14329	2.3862	-1.43057	7.71555	-0.204701	-1.04684	-1.93399	0.680522	-3.35391
FRAS26	0.579754	0.582796	0.652241	0.608453	0.569414	0.52624	0.521015	0.488774	0.490202	0.537517	0.437926	0.47454	0.499579	0.491679	0.375546	0.374081	0.590219			0.00524745	0.119157	-0.067134	-0.0641617	-0.0758215	-0.00992889	-0.0618806	0.00292036	0.0965219	-0.185279	0.0836082	0.0527631	-0.0158137	-0.236195	-0.00390292	0.577786
FRAS27	0.684445	0.694619	0.741839	0.677363	0.638644	0.593828	0.584908	0.539887	0.524967	0.542034	0.434634	0.42776	0.43729	0.461554	0.31601	0.296113	0.544104			0.0148637	0.0679794	-0.0869132	-0.057162	-0.0701732	-0.0150213	-0.0769713	-0.0276344	0.0325097	-0.198141	-0.0158173	0.0222789	0.0554872	-0.315334	-0.0629631	0.837488
FRAS28	0.707458	0.710718	0.775035	0.739362	0.696483	0.664565	0.670465	0.63583	0.626629	0.645635	0.552686	0.556259	0.569152	0.589055	0.456842	0.425375	0.63851			0.00460827	0.0904947	-0.0460276	-0.0579946	-0.0458266	0.00887707	-0.0516572	-0.0144706	0.0303302	-0.143966	0.00646585	0.0231778	0.0349698	-0.22445	-0.0688797	0.501052
FRAS29	0.723937	0.73263	0.781109	0.73196	0.691658	0.652089	0.653968	0.615511	0.60923	0.642841	0.556006	0.560214	0.576915	0.594357	0.459523	0.441655	0.658177			0.0120079	0.0661719	-0.0629228	-0.0550595	-0.0572085	0.00288087	-0.0588062	-0.0102043	0.0551691	-0.135079	0.00756728	0.0298126	0.0302337	-0.226857	-0.0388837	0.490249
FRAS30	0.81984	0.826701	0.854889	0.810051	0.779316	0.745215	0.74847	0.713124	0.70801	0.726703	0.658038	0.665285	0.677419	0.689852	0.568303	0.545332	0.744073			0.00836899	0.034097	-0.0524497	-0.0379415	-0.0437572	0.00436685	-0.0472245	-0.00717033	0.0264013	-0.0944878	0.0110132	0.0182381	0.0183542	-0.176196	-0.0404201	0.364439
FRAS31	0.456221	0.455922	0.544812	0.471801	0.435106	0.376016	0.369998	0.337421	0.340253	-0.0813343	-0.0693635	-0.0680669	-0.053725	-0.0788639	-0.0673265	-0.0662466	-0.0522883			-0.000654182	0.194966	-0.13401	-0.0777778	-0.135806	-0.0160052	-0.0880457	0.00839452	-1.23904	-0.14718	-0.0186932	-0.210703	0.467918	-0.146295	-0.01604	-0.210702
FRAS32	0.410436	0.412029	0.498879	0.454531	0.415189	0.36997	0.361448	0.332987	0.336854	0.428481	0.29995	0.356631	0.382417	0.387826	0.243779	0.230704	0.481769			0.0038813	0.210786	-0.0888945	-0.086557	-0.10891	-0.0230346	-0.0787432	0.011615	0.272006	-0.299969	0.188971	0.0723021	0.014146	-0.371422	-0.053633	1.08825
FRAS33	0.222945	0.2249	0.294218	0.238024	0.216551	0.168926	0.168176	0.152521	0.15713	0.147201	0.0642686	0.0728633	0.0932419	0.089207	0.0210296	0.00941825	0.160219			0.00876949	0.308217	-0.190995	-0.090212	-0.219926	-0.00443984	-0.0930868	0.0302179	-0.063193	-0.563394	0.133731	0.279683	-0.0432742	-0.76426	-0.552144	16.0116
FRAS34	0.679077	0.688093	0.745132	0.695214	0.662137	0.618521	0.618845	0.578414	0.56939	0.539188	0.388657	0.362115	0.381272	0.376866	0.241544	0.237824	0.49489			0.0132773	0.0828945	-0.0669933	-0.0475778	-0.0658718	0.000524598	-0.0653323	-0.0156022	-0.0530419	-0.279181	-0.0682933	0.052903	-0.0115548	-0.359071	-0.0154011	1.0809
FRAS35	0.184928	0.142293	0.144203		-0.0285741	-0.0286375	-0.0287403					-0.0285714	-0.0285714							-0.23055	0.0134202	-1	#DIV/0!	0.00221965	0.00359055	-1	#DIV/0!	#DIV/0!	#DIV/0!	#DIV/0!	3.1572e-15	-1	#DIV/0!	#DIV/0!	#DIV/0!
UKGS1	0.397239	0.414577	0.4115	0.413845	0.352717	0.346768	0.34107	0.325657	0.327901	0.333587	0.226074	0.223749	0.173207	0.21186	0.198985	0.193315	0.210563			0.043647	-0.00742221	0.0056986	-0.147707	-0.0168654	-0.0164313	-0.0451922	0.00689171	0.0173395	-0.322293	-0.0102832	-0.225889	0.223164	-0.0607715	-0.0284986	0.0892271
UKGS2	0.431519	0.347995	0.321878	0.304888	0.380404	0.329947	0.0943589	0.253024	0.312002	0.300845	0.190419	-0.353769	0.0100252	-0.0391936	-0.0325675	-0.0694726	-0.0802772			-0.193556	-0.0750524	-0.0527825	0.247683	-0.13264	-0.714018	1.6815	0.233096	-0.0357599	-0.367054	-2.85785	-1.02834	-4.90949	-0.16906	1.13319	0.155523
UKGS3	0.39883	0.412811	0.439535	0.447003	0.383509	0.37508	0.36525	0.350361	0.349586	0.369855	0.253727	0.19729	0.156273	0.164216	0.189573	0.199198	0.22598			0.0350544	0.0647362	0.0169921	-0.142045	-0.0219774	-0.0262068	-0.0407659	-0.00221049	0.0579802	-0.313984	-0.222431	-0.207901	0.0508229	0.154414	0.0507749	0.134449
UKGS4	-0.362558	-0.302534	-0.254246	-0.0411351	-0.115669	-0.184541	-0.184736	-0.103869	-0.174159	-0.159987	-0.11441	-0.158935	-0.160522	-0.0820457	-0.0792525	-0.0797403	-0.138355			-0.165556	-0.159611	-0.838208	1.81194	0.595416	0.00105485	-0.437743	0.676719	-0.0813751	-0.28488	0.389172	0.00998542	-0.488881	-0.0340449	0.00615601	0.735064
UKGS5	-0.0585523	-0.0557689	-0.0477205	-0.0341419	-0.0329775	-0.0469742	-0.049024	-0.0426598	-0.0416884	-0.0448999	-0.0339916	-0.0276931	-0.0291401	-0.0284806	-0.0220542	-0.0192973	-0.0209961			-0.047536	-0.144317	-0.284544	-0.034106	0.424433	0.0436365	-0.129819	-0.0227703	0.0770347	-0.242946	-0.185297	0.0522527	-0.022631	-0.225642	-0.125004	0.0880317
UKGS6	0.181343	0.181545	0.0899469	0.06851	0.00292908	-0.0116785	-0.0420593	-0.0132667	0.0102522	0.0430373	-0.145136	-0.20105	-0.246402	-0.210908	-0.153327	-0.189454	-0.184124			0.00111076	-0.504547	-0.238329	-0.957246	-4.98708	2.60143	-0.684571	-1.77278	3.19786	-4.37233	0.385249	0.225577	-0.144051	-0.273015	0.23562	-0.0281321
UKGS7	0.0326149	0.0175372	0.00898749	0.0323412	-0.0631614	-0.0826228	-0.119738	-0.0819425	-0.0324767	0.025405	-0.188527	-0.281388	-0.3406	-0.278571	-0.188899	-0.225477	-0.20368			-0.462295	-0.487518	2.59847	-2.95297	0.308122	0.44921	-0.315651	-0.603664	-1.78225	-8.42085	0.492563	0.210429	-0.182118	-0.321901	0.193638	-0.0966707
UKGS8	-0.431422	-0.528809	-0.402386	-0.260904	-0.267093	-0.372412	-0.256203	0.0342771	-0.0790357	-0.094464	-0.25541	-0.019757	-0.0606029	-0.0537067	-0.298243	-0.384249	-0.0964107			0.225735	-0.239071	-0.351608	0.0237197	0.394319	-0.312043	-1.13379	-3.30579	0.195206	1.70379	-0.922646	2.06741	-0.113793	4.55318	0.288375	-0.749093
UKGS9	-0.654349	-0.62989	-0.636013	-0.545863	-0.559127	-0.547327	-0.284415	-0.0438493	-0.124217	-0.233886	-0.369052	-0.402057	-0.388562	-0.370606	-0.296679	-0.428477	-0.485906			-0.0373788	0.00972021	-0.141743	0.0242992	-0.0211041	-0.480357	-0.845826	1.83283	0.882874	0.577916	0.0894318	-0.033565	-0.0462113	-0.199475	0.444242	0.134031
UKGS10	0.20212	0.197149	0.126732	0.10633	0.0379812	0.0257832	0.00697864	0.0558005	0.0581085	0.0932404	-0.112799	-0.188926	-0.238938	-0.206204	-0.153819	-0.191207	-0.184129			-0.0245911	-0.357176	-0.160986	-0.642799	-0.321158	-0.729334	6.9959	0.0413617	0.604591	-2.20977	0.674888	0.264718	-0.136999	-0.254046	0.24307	-0.0370203
UKGS11	0.299156	0.294012	0.223591	0.205072	0.131365	0.110516	0.0725497	0.128614	0.148577	0.196132	-0.057696	-0.175328	-0.235425	-0.183103	-0.111467	-0.160679	-0.15474			-0.0171952	-0.239517	-0.0828273	-0.35942	-0.158712	-0.343535	0.77277	0.155214	0.320073	-1.29417	2.03883	0.342769	-0.222246	-0.391232	0.441489	-0.0369627
UKGS12	0.335538	0.319153	0.255097	0.12878	0.0542155	-0.108514	-0.353678	0.127427	-0.0604054	-0.042408	0.0028305	-0.137665	-0.189631	-0.153598	-0.0911622	-0.155535	-0.138635			-0.0488314	-0.200707	-0.495172	-0.579007	-3.00152	2.25929	-1.36029	-1.47404	-0.297943	-1.06674	-49.6364	0.377476	-0.190017	-0.406487	0.706138	-0.108658
UKGS13	0.225396	0.232005	0.122069	-0.0344518	-0.115741	-0.248359	-0.253639	0.0753654	-0.170948	-0.144182	-0.0185884	-0.178134	-0.197642	-0.166646	-0.114326	-0.170035	-0.150634			0.0293208	-0.473852	-1.28223	2.35949	1.14582	0.0212603	-1.29714	-3.26825	-0.156573	-0.871077	8.58309	0.10951	-0.156829	-0.313956	0.487284	-0.114102
UKGS14	-0.440512	-0.5085	0.0397835	-0.234268	-0.198259	-0.0308597	-0.0189714	0.00972196	-0.00444858	0.0121745	-0.0943641	-0.112795	-0.141543	-0.139041	-0.472765	-0.5385	-0.117355			0.154338	-1.07824	-6.88857	-0.153708	-0.844347	-0.385237	-1.51245	-1.45758	-3.73672	-8.75096	0.195319	0.254867	-0.0176748	2.40017	0.139044	-0.78207
UKGS15	-0.302357	-0.448325	-0.434067	-0.494382	-0.528269	-0.603634	-0.581956	-0.238844	-0.562694	-0.542005	-0.369902	-0.597531	-0.554104	-0.577332	-0.663023	-0.586477	-0.607048			0.482766	-0.0318037	0.138953	0.0685437	0.142665	-0.0359122	-0.589584	1.35591	-0.0367694	-0.31753	0.615377	-0.0726779	0.0419195	0.148427	-0.115451	0.0350765
UKGS16	0.00481891	-0.017596	-0.0214208	0.00169684	-0.0166404	-0.0558277	-0.0950959	0.00145859	-0.117824	-0.111735	-0.0910339	-0.107407	-0.102863	-0.121401	-0.124144	-0.118687	-0.11304			-4.65145	0.217363	-1.07921	-10.8067	2.35495	0.703381	-1.01534	-81.7797	-0.0516777	-0.185273	0.179857	-0.0423082	0.180222	0.0225956	-0.0439545	-0.0475797
UKGS17	0.178767	0.181422	0.196968	0.194888	0.149064	0.136354	0.126577	0.147816	0.167702	0.190452	-0.0335395	-0.0613637	-0.177687	-0.174365	-0.168404	-0.225722	-0.185211			0.014849	0.0856892	-0.0105577	-0.235131	-0.0852673	-0.0716992	0.167795	0.134533	0.135652	-1.17611	0.829595	1.89563	-0.0186931	-0.0341888	0.340362	-0.179473
UKGS18	0.416124	0.399343	0.371817	0.347554	0.274249	0.240107	0.199677	0.249412	0.280109	0.318119	0.0617119	-0.0995993	-0.193102	-0.0973567	-0.00581347	-0.0678348	-0.0580695			-0.0403264	-0.0689277	-0.065256	-0.210916	-0.124492	-0.168383	0.249076	0.123077	0.135695	-0.80601	-2.61394	0.938786	-0.495827	-0.940287	10.6685	-0.143958
UKGS19	0.141013	0.140454	0.12102	0.151457	0.100275	0.0234271	-0.00197914	0.109821	0.059914	0.104507	-0.0689798	-0.109063	-0.212154	-0.209203	-0.191281	-0.239213	-0.207498			-0.00396391	-0.138367	0.2515	-0.33793	-0.766371	-1.08448	-56.4895	-0.454441	0.744287	-1.66005	0.581087	0.94524	-0.0139107	-0.0856663	0.250585	-0.132581
UKGS20	0.409228	0.425538	0.318291	0.308234	0.275397	0.17029	0.111396	0.235037	0.179597	0.192611	0.0962738	-0.00607226	-0.0958242	0.00480282	0.034409	-0.0570751	-0.0482684			0.0398566	-0.252028	-0.0315958	-0.106532	-0.381657	-0.345843	1.10992	-0.235879	0.0724608	-0.500164	-1.06307	14.7806	-1.05012	6.16434	-2.65872	-0.154301
UKGS21	0.427807	0.458638	0.215976	-0.0143852	-0.0351425	-0.0469691	-0.0559248	-0.0342739	-0.0350486	-0.0169807	-0.104938	-0.104594	-0.133429	-0.147009	-0.139117	-0.150925	-0.135328			0.0720664	-0.529093	-1.06661	1.44297	0.336533	0.190671	-0.387142	0.0226024	-0.515509	5.1798	-0.00327027	0.275675	0.101779	-0.0536797	0.0848775	-0.103347
UKGS22	-0.0447571	-0.0422312	-0.00462846	0.0373815	-0.0126659	-0.0307317	-0.0658947	-0.0369708	-0.0670131	-0.0370548	-0.207162	-0.215613	-0.255024	-0.182265	-0.174207	-0.227606	-0.208051			-0.0564346	-0.890402	-9.07644	-1.33883	1.42634	1.14419	-0.438941	0.812593	-0.447052	4.5907	0.040793	0.182785	-0.285301	-0.0442135	0.306528	-0.0859134
UKGS23	0.420414	0.404746	0.38221	0.366696	0.311789	0.281932	0.253909	0.270928	0.294643	0.321058	0.15833	0.120538	-0.0101661	0.0639369	0.0248771	-0.0280605	-0.00418587			-0.0372685	-0.0556799	-0.0405895	-0.149735	-0.095759	-0.0993986	0.0670299	0.0875303	0.0896525	-0.506849	-0.23869	-1.08434	-7.28924	-0.610912	-2.12797	-0.850827
UKGS24	-0.468185	-0.500454	-0.391602	-0.3802	-0.347102	-0.332896	-0.299229	-0.323532	-0.339515	-0.326427	-0.325475	-0.0893889	-0.251287	-0.301878	-0.333529	-0.340916	-0.184859			0.0689228	-0.217506	-0.0291171	-0.0870538	-0.0409274	-0.101134	0.0812191	0.0494018	-0.038549	-0.00291553	-0.725359	1.81117	0.201326	0.104848	0.02215	-0.45776
UKGS25	-0.0624259	-0.063101	-0.0647381	-0.0658597	-0.0910924	-0.105537	-0.127631	-0.108532	-0.103377	-0.0815332	-0.223064	-0.238873	-0.258417	-0.150031	-0.121248	-0.186778	-0.226837			0.0108148	0.025945	0.0173239	0.383128	0.15857	0.209348	-0.149645	-0.0474904	-0.211305	1.73586	0.0708754	0.081816	-0.419423	-0.19185	0.540468	0.214471
UKGS26	0.406123	0.387338	0.358985	0.342888	0.258485	0.25062	0.222527	0.248562	0.286026	0.332814	0.189704	-0.0266711	-0.112528	0.0211205	0.00796396	-0.0977577	-0.0753623			-0.0462537	-0.0731997	-0.0448396	-0.246155	-0.0304264	-0.112095	0.116998	0.150723	0.163579	-0.430001	-1.14059	3.2191	-1.18769	-0.622927	-13.275	-0.229091
UKGS27	0.145068	0.138624	0.151751	0.149402	0.0742087	0.0238575	-0.0419424	0.0406413	0.0962603	0.139287	-0.317573	-0.432327	-0.491536	-0.448623	-0.365051	-0.440612	-0.41885			-0.0444197	0.0946938	-0.0154788	-0.503294	-0.678508	-2.75804	-1.96898	1.36853	0.446983	-3.27999	0.361347	0.136956	-0.0873052	-0.186286	0.206989	-0.0493905
UKGS28	0.201268	0.178115	0.279023	0.285189	0.184464	0.0907256	-0.0240411	0.102187	0.165391	0.202879	-0.450329	-0.545021	-0.618613	-0.553916	-0.466159	-0.585637	-0.550264			-0.11504	0.566538	0.0220995	-0.353187	-0.508167	-1.26499	-5.25052	0.61851	0.226664	-3.21969	0.210273	0.135027	-0.104584	-0.15843	0.256303	-0.060401
UKGS29	0.157739	0.1518	0.0810143	0.0598233	-0.00899589	-0.0417916	-0.101563	-0.0434688	0.00537116	0.039594	-0.254203	-0.326234	-0.375933	-0.350532	-0.296125	-0.344255	-0.321451			-0.0376523	-0.46631	-0.261572	-1.15037	3.64563	1.43023	-0.572003	-1.12356	6.37159	-7.42024	0.28336	0.152344	-0.0675681	-0.155214	0.162533	-0.06624
UKGS30	0.578488	0.584201	0.573437	0.561095	0.512694	0.48723	0.428612	0.49962	0.542854	0.568441	0.175537	-0.00639849	-0.204979	-0.134073	-0.0192586	-0.195478	-0.120427			0.00987494	-0.0184245	-0.0215232	-0.0862627	-0.0496659	-0.12031	0.16567	0.0865328	0.0471345	-0.691196	-1.03645	31.0355	-0.345916	-0.856358	9.15014	-0.383933
UKGS31	0.245005	0.2383	0.234314	0.229148	0.160448	0.134829	0.0844247	0.159864	0.132902	0.167899	-0.127581	-0.17954	-0.277577	-0.253868	-0.201259	-0.277899	-0.240183			-0.027369	-0.0167264	-0.0220474	-0.299807	-0.159668	-0.37384	0.893564	-0.168655	0.263328	-1.75987	0.407263	0.546048	-0.0854147	-0.207229	0.380799	-0.135718
UKGS32	0.227002	0.22904	0.219145	0.212033	0.143347	0.113909	0.0678722	0.125328	0.111651	0.137396	-0.119211	-0.174914	-0.268246	-0.247999	-0.199385	-0.273904	-0.237138			0.00897697	-0.0432004	-0.0324561	-0.323939	-0.205364	-0.404154	0.84653	-0.109128	0.230584	-1.86765	0.467266	0.533581	-0.0754785	-0.196023	0.373742	-0.134231
UKGS33	-0.0608353	-0.0610256	-0.0189493	-0.0119805	-0.0355611	-0.0478786	-0.0554255	-0.0337471	-0.0413702	-0.0293943	-0.0897475	-0.107562	-0.136591	-0.139673	-0.136296	-0.1543	-0.141303			0.00312839	-0.689486	-0.367758	1.96824	0.346375	0.157625	-0.391126	0.225887	-0.28948	2.05322	0.198494	0.269881	0.0225672	-0.0241769	0.132096	-0.0842318
UKGS34	0.218587	0.216665	0.202435	0.198676	0.13806	0.116471	0.0673974	0.129984	0.158641	0.192275	-0.107936	-0.147465	-0.234124	-0.21484	-0.185677	-0.250141	-0.216452			-0.00879234	-0.0656754	-0.0185704	-0.305098	-0.156379	-0.421336	0.928625	0.220465	0.212008	-1.56136	0.36623	0.587654	-0.0823655	-0.135741	0.347179	-0.134678
UKGS35	-0.0294422	-0.029676	-0.0298839	-0.0300538	-0.0294368	-0.0300603	-0.0301662	-0.0300021	-0.0298367	-0.0301739	-0.0299186	-0.0320314	-0.0305968	-0.0287974	-0.0280498	-0.0273653	-0.0278827			0.00793834	0.0070055	0.00568589	-0.0205287	0.0211795	0.00352363	-0.00543926	-0.00551278	0.0113008	-0.00846146	0.0706177	-0.0447875	-0.0588077	-0.0259629	-0.0244034	0.0189081
GRCS1	0.416349	0.354242	0.426338	0.362149	0.465775	0.420221	0.355835	0.393746	0.12238	-0.175561	-0.125571	0.235759	-0.0736451	0.271284	-0.10419	-0.192262	-0.229119			-0.149171	0.203523	-0.15056	0.286142	-0.0978015	-0.153219	0.106539	-0.68919	-2.43455	-0.284741	-2.87749	-1.31237	-4.68366	-1.38406	0.845296	0.191705
GRCS2	-0.260192	-0.403221	-0.253125	-0.225355	-0.121657	-0.126698	-0.642944	-0.662382	-0.642086	-0.684438	-0.649114	-0.67444	-0.604301	-0.4824	-0.53921	-0.561918	-0.564121			0.549709	-0.372243	-0.109708	-0.460154	0.0414341	4.07463	0.0302328	-0.0306405	0.0659594	-0.0516108	0.0390164	-0.103995	-0.201723	0.117766	0.0421119	0.00392172
GRCS3	0.274968	0.195744	0.28543	0.269995	0.275572	0.237004	0.142476	0.155077	-0.0990624	-0.360424	-0.319956	0.170342	0.225852	0.250524	0.165454	0.105845	0.231256			-0.288121	0.458179	-0.0540748	0.0206573	-0.139957	-0.398847	0.0884408	-1.6388	2.63835	-0.112278	-1.53239	0.325875	0.109241	-0.33957	-0.360275	1.18486
GRCS4	-0.171497	-0.159072	-0.153942	-0.143044	-0.277352	-0.279447	-0.277136	-0.272059	-0.269746	-0.351471	-0.310081	-0.0389059	-0.0325021	-0.00726297	-0.0323585	-0.142419	-0.106712			-0.0724492	-0.0322463	-0.0707928	0.938923	0.00755353	-0.00826954	-0.0183192	-0.00850368	0.302974	-0.117762	-0.87453	-0.164596	-0.776538	3.45527	3.40128	-0.250721
GRCS5	-0.0396314	-0.0309094	0.0195042	-0.0738968	-0.030185	-0.0438918	-0.0370078	-0.0428662	-0.0448419	-0.0492462	-0.0483231	-0.0342854	-0.0338901	-0.0284706	-0.0307552	-0.0349138	-0.0321518			-0.220078	-1.63101	-4.78876	-0.591524	0.454091	-0.156839	0.158301	0.0460888	0.0982199	-0.0187463	-0.290497	-0.0115278	-0.159915	0.0802438	0.135216	-0.0791097
GRCS6	0.161813	0.102702	0.267731	0.0715248	0.0524736	0.0381064	0.0131698	-0.0024845	-0.0933891	-0.104247	-0.0864835	-0.0674065	-0.0325362	0.0165505	-0.00232513	-0.0817522	-0.0135273			-0.365306	1.60688	-0.732848	-0.266358	-0.273798	-0.654394	-1.18865	36.5887	0.116267	-0.170399	-0.220585	-0.517313	-1.50868	-1.14049	34.1603	-0.834532
GRCS7	0.0182437	0.00462566	0.16587	0.0550985	0.000940785	-0.0645925	-0.0452142	-0.120211	0.00955323	0.0871715	0.127942	0.000337001	0.0422282	0.0960095	0.0501098	-0.0477946	0.020588			-0.746452	34.8587	-0.667821	-0.982925	-69.6581	-0.300008	1.6587	-1.07947	8.12482	0.467703	-0.997366	124.306	1.27359	-0.478075	-1.9538	-1.43076
GRCS8	-0.427788	-0.54639	-0.406328	-0.510132	-0.716502	-0.787573	-0.781918	-0.796201	-0.792746	-0.840394	-0.821303	-0.838359	-0.777468	-0.634905	-0.723119	-0.802339	-0.78419			0.277244	-0.256341	0.255468	0.404543	0.0991906	-0.0071798	0.0182662	-0.00433877	0.0601047	-0.0227162	0.0207659	-0.0726312	-0.183368	0.13894	0.109554	-0.0226199
GRCS9	0.183672	0.00130771	0.0511114	-0.143942	-0.142244	-0.208803	-0.19491	-0.22941	-0.364686	-0.470545	-0.342853	-0.171611	-0.149582	-0.264397	-0.337172	-0.319728	-0.385188			-0.99288	38.0848	-3.81624	-0.0117921	0.467919	-0.066535	0.177003	0.589667	0.290275	-0.27137	-0.499462	-0.128367	0.767574	0.275252	-0.0517371	0.204736
GRCS10	-0.438311	-0.536097	-0.421939	-0.542044	-0.571044	-0.580994	-0.589592	-0.598893	-0.528159	-0.283527	-0.197757	-0.237519	-0.34388	-0.326114	-0.321802	-0.23744	-0.379766			0.223098	-0.212943	0.28465	0.053501	0.0174257	0.0147973	0.0157763	-0.118108	-0.463179	-0.30251	0.201066	0.447796	-0.0516641	-0.0132198	-0.262156	0.599417
GRCS11	0.330839	0.252424	0.405579	0.228742	0.154312	0.153764	0.15474	0.131796	0.0183209	-0.0126809	0.0111137	-0.00789246	0.051311	0.176906	0.128907	-0.0245485	0.110572			-0.237019	0.606741	-0.436011	-0.325389	-0.00355509	0.00635306	-0.148277	-0.86099	-1.69215	-1.87641	-1.71016	-7.50126	2.44772	-0.271322	-1.19044	-5.50422
GRCS12	0.363434	0.281204	0.426436	0.23521	0.19734	0.209449	0.19443	0.15996	0.035855	0.0277589	-0.00252874	-0.136778	-0.489981	-0.468182	-0.590659	-0.384069	-0.453721			-0.226259	0.516465	-0.448428	-0.161004	0.0613587	-0.0717079	-0.177288	-0.77585	-0.225799	-1.0911	53.0896	2.58231	-0.0444902	0.261602	-0.349763	0.181354
GRCS13	0.057667	0.0273463	0.147787	0.0553023	0.032107	0.0595023	0.0487422	0.0300502	-0.0605495	-0.086353	-0.0550096	-0.0669909	-0.0321697	0.00434564	-0.0114842	-0.0757992	-0.0234289			-0.525789	4.40427	-0.625796	-0.419427	0.853249	-0.180836	-0.383487	-3.01495	0.426156	-0.362969	0.217805	-0.519791	-1.13509	-3.6427	5.60029	-0.690909
GRCS14	-0.293573	-0.355096	-0.278886	-0.381497	-0.383314	-0.410391	-0.391978	-0.374495	-0.328411	-0.367756	-0.311037	-0.0416145	-0.0238212	0.0428138	-0.0664513	-0.0667121	-0.0536575			0.209567	-0.214618	0.367933	0.00476174	0.0706389	-0.0448669	-0.0445999	-0.123057	0.119804	-0.154231	-0.866207	-0.427575	-2.7973	-2.5521	0.0039254	-0.195686
GRCS15	-0.0130839	-0.0307875	0.0388742	0.00813118	0.00994213	-0.0212199	-0.0565013	-0.0476674	-0.128199	-0.176264	-0.146076	-0.0428875	-0.129037	-0.0484984	-0.0672469	-0.0763808	-0.0660122			1.35309	-2.26266	-0.790834	0.222717	-3.13435	1.66265	-0.156349	1.68945	0.374923	-0.171266	-0.706403	2.00873	-0.624152	0.38658	0.135828	-0.135749
GRCS16	0.0015062	-0.0194456	0.0663568	-0.00667625	-0.0316086	-0.00635134	-0.00581826	-0.0160881	-0.0876768	-0.106221	-0.087007	-0.0307806	-0.0301056	-0.00858189	-0.0223162	-0.0354631	-0.0287531			-13.9104	-4.41243	-1.10061	3.73448	-0.799063	-0.0839318	1.7651	4.44981	0.211505	-0.180886	-0.646229	-0.0219302	-0.71494	1.60038	0.589121	-0.189211
GRCS17	0.0863969	0.0423562	0.152349	0.0855867	0.0638127	0.0938568	0.126672	0.117561	-0.206673	-0.394747	-0.351373	0.0335146	-0.145412	-0.113615	-0.168553	0.111715	0.00605328			-0.509748	2.59686	-0.43822	-0.254409	0.470817	0.349627	-0.0719264	-2.75801	0.910007	-0.109878	-1.09538	-5.33879	-0.218673	0.483553	-1.66279	-0.945815
GRCS18	0.266343	0.158933	0.384922	0.168515	0.153523	0.192994	0.197166	0.164987	0.0412366	-0.0398238	0.0158065	-0.0698833	0.0357574	0.170456	0.10662	-0.10124	0.0318384			-0.403279	1.42192	-0.562209	-0.0889671	0.2571	0.0216208	-0.163211	-0.750061	-1.96574	-1.39691	-5.42118	-1.51167	3.76702	-0.374503	-1.94954	-1.31448
GRCS19	0.215404	0.154008	0.221916	0.0777617	-0.0597109	-0.125403	-0.127073	-0.151493	-0.245831	-0.233224	-0.234504	-0.2073	-0.192882	-0.0363509	-0.138608	-0.214046	-0.176604			-0.285028	0.440937	-0.64959	-1.76787	1.10016	0.0133165	0.192176	0.62272	-0.0512805	0.00548867	-0.116009	-0.0695511	-0.811538	2.81304	0.54426	-0.174926
GRCS20	0.544565	0.474396	0.586769	0.524644	0.285192	-0.0531754	-0.0441313	-0.0887554	-0.413813	-0.397727	-0.379642	-0.408564	-0.264879	0.379094	-0.00530966	-0.374826	-0.170601			-0.128854	0.236876	-0.105876	-0.456408	-1.18645	-0.17008	1.01117	3.6624	-0.0388733	-0.0454707	0.0761832	-0.351683	-2.4312	-1.01401	69.5932	-0.544852
GRCS21	0.346857	0.164937	0.341059	-0.00105259	-0.100461	-0.0294662	-0.0542139	-0.21844	-0.612234	-0.440828	-0.471418	-0.612875	0.0567383	-0.549111	0.0251322	-0.194221	-0.137508			-0.524482	1.06782	-1.00309	94.4414	-0.706691	0.83987	3.02922	1.80276	-0.279969	0.0693932	0.300066	-1.09258	-10.678	-1.04577	-8.72798	-0.292004
GRCS22	0.199976	0.173262	0.273795	0.246596	0.230823	0.13811	0.1978	0.179431	0.171888	0.0892827	0.13164	0.0926734	0.160284	0.20528	0.070017	-0.0175433	0.106451			-0.133585	0.580236	-0.0993412	-0.063965	-0.401659	0.43219	-0.0928687	-0.0420362	-0.480577	0.474422	-0.296011	0.729563	0.280726	-0.65892	-1.25056	-7.06791
GRCS23	0.352392	0.291652	0.436654	0.329444	0.0631063	-0.180737	-0.175128	-0.195212	-0.361582	-0.383212	-0.367127	-0.371667	-0.293657	0.13684	-0.153626	-0.353627	-0.222252			-0.172364	0.497173	-0.245524	-0.808446	-3.86401	-0.0310333	0.11468	0.852252	0.0598219	-0.0419745	0.0123656	-0.209891	-1.46599	-2.12267	1.30187	-0.371507
GRCS24	-0.822325	-0.829959	-0.766122	-0.806266	-0.815907	-0.808474	-0.804567	-0.810383	-0.788783	-0.771517	-0.71574	-0.814089	-0.713333	-0.804537	-0.753797	-0.62106	-0.69422			0.00928354	-0.0769162	0.0523987	0.0119578	-0.00910968	-0.00483255	0.00722774	-0.026653	-0.02189	-0.0722955	0.137409	-0.123765	0.127856	-0.0630672	-0.176092	0.117798
GRCS25	0.027856	0.0178947	0.0826982	0.034386	0.0321425	-0.0592481	-0.0126942	-0.0500231	-0.18615	-0.246342	-0.219825	-0.0891062	-0.0309555	0.00599772	-0.0823164	-0.154623	-0.110006			-0.357601	3.62138	-0.584199	-0.0652431	-2.84329	-0.785744	2.94062	2.72129	0.32335	-0.107645	-0.594649	-0.652599	-1.19375	-14.7246	0.878397	-0.288553
GRCS26	0.0464348	0.0162727	0.245106	-0.0207181	-0.100084	-0.148663	-0.13954	-0.156132	-0.33878	-0.354746	-0.349048	-0.28797	-0.178989	0.2196	-0.0859144	-0.331379	-0.0817425			-0.649559	14.0624	-1.08453	3.83075	0.48538	-0.0613621	0.118905	1.16983	0.0471273	-0.0160617	-0.174985	-0.378447	-2.22689	-1.39123	2.85708	-0.753326
GRCS27	0.327083	0.298379	0.396904	0.333966	0.106867	-0.0750165	-0.0529869	-0.0846898	-0.214253	-0.25983	-0.228856	-0.269596	-0.191193	0.207011	-0.0564309	-0.25885	-0.110476			-0.0877554	0.3302	-0.158573	-0.680006	-1.70196	-0.293663	0.598314	1.52986	0.212721	-0.119209	0.17802	-0.290817	-2.08273	-1.2726	3.58702	-0.573203
GRCS28	0.365921	0.354331	0.489445	0.426115	0.221961	-0.0100325	0.0167268	-0.0247561	-0.270394	-0.36117	-0.357063	-0.190393	-0.114373	0.35789	0.0491925	-0.23435	-0.00404148			-0.0316731	0.381322	-0.129391	-0.479105	-1.0452	-2.66726	-2.48003	9.92231	0.335719	-0.0113731	-0.46678	-0.399282	-4.12916	-0.862549	-5.76394	-0.982755
GRCS29	0.337064	0.271642	0.50024	0.333392	0.280454	0.318618	0.318955	0.291183	0.0989142	0.0252496	0.124781	0.038247	0.186121	0.368094	0.334616	0.0335453	0.257636			-0.194095	0.841544	-0.333536	-0.158787	0.136083	0.00105758	-0.087074	-0.660302	-0.744733	3.94192	-0.693488	3.86629	0.977713	-0.0909502	-0.89975	6.68024
GRCS30	0.466079	0.435936	0.555385	0.428427	0.360205	0.32977	0.35443	0.3166	0.231522	0.160415	0.21452	0.116617	0.224112	0.380181	0.213243	-0.00575356	0.200196			-0.0646739	0.274006	-0.228594	-0.159238	-0.0844939	0.0747786	-0.106733	-0.268726	-0.307129	0.337283	-0.456379	0.921774	0.696386	-0.4391	-1.02698	-35.7951
GRCS31	-0.0247652	-0.0265586	-0.0171338	-0.0187227	-0.0284397	-0.03722	-0.0362231	-0.0369999	-0.0362754	-0.04536	-0.0479836	-0.0408135	-0.037129	-0.0266045	-0.0345764	-0.0337639	-0.030138			0.0724135	-0.354867	0.0927341	0.518996	0.308734	-0.0267854	0.0214443	-0.0195813	0.250434	0.0578399	-0.149427	-0.0902773	-0.283459	0.299646	-0.0234985	-0.107388
GRCS32	0.120174	0.1132	0.145657	0.103161	0.033327	0.0655267	0.0534346	0.0486034	-0.0422173	-0.139565	-0.135437	-0.031738	-0.0454458	-0.0402624	-0.0371097	0.00852835	0.00789011			-0.0580312	0.286719	-0.291756	-0.67694	0.966172	-0.184536	-0.0904131	-1.86861	2.30588	-0.0295772	-0.765663	0.431904	-0.114055	-0.0783041	-1.22981	-0.0748382
GRCS33	0.433233	0.418255	0.464031	0.419608	0.391864	0.417133	0.383159	0.37136	0.408034	0.469857	0.475582	0.369071	0.361639	0.443166	0.420024	0.425044	0.419133			-0.0345727	0.109447	-0.0957335	-0.0661181	0.0644816	-0.0814458	-0.0307946	0.0987581	0.151513	0.0121859	-0.223959	-0.020138	0.225438	-0.05222	0.0119512	-0.0139068
GRCS34	0.224718	0.184297	0.310936	0.220803	0.176683	0.0727463	0.127753	0.0980903	0.0337319	-0.00398491	0.0384613	0.000819301	0.0757079	0.164451	-0.0353349	-0.149399	-0.00490089			-0.179875	0.68715	-0.289878	-0.199816	-0.588266	0.756145	-0.232188	-0.656114	-1.11813	-10.6517	-0.978698	91.4055	1.17217	-1.21487	3.22809	-0.967196
GRCS35	-0.0285714	-0.0296328	-0.0285715	-0.028591		-0.0285714	-0.0285715	-0.0286438	-0.0307148	-0.0296112	-0.0296892	-0.0300854	-0.0306456	-0.0301128	-0.0318482	-0.0286847	-0.0306536			0.0371467	-0.0358149	0.00068399	-1	#DIV/0!	2.23494e-06	0.00253247	0.0723001	-0.0359315	0.00263483	0.0133455	0.0186189	-0.0173861	0.0576315	-0.0993301	0.0686373
HRVS1	0.385587	0.364514	0.244806	0.118424	-0.106426	-0.316552	-0.204597	0.00841586	-0.106757	-0.0585331	0.0876793	-0.43818	-0.605891	-0.610108	-0.748467	-0.834413	-0.725065			-0.0546504	-0.328404	-0.516255	-1.89868	1.97439	-0.353669	-1.04113	-13.6853	-0.451718	-2.49794	-5.99754	0.382742	0.00696066	0.226778	0.114829	-0.131048
HRVS2	-0.73874	-0.622032	-0.537258	-0.552476	-0.657592	-0.620163	-0.638905	-0.605863	-0.622345	-0.6155	-0.594278	-0.484817	-0.431278	-0.32336	-0.344227	-0.259908	-0.353323			-0.157982	-0.136286	0.0283244	0.190264	-0.0569179	0.0302219	-0.0517173	0.0272039	-0.0109991	-0.0344787	-0.184192	-0.110432	-0.250227	0.0645304	-0.244951	0.359415
HRVS3	0.233411	0.16583	0.228651	0.234547	-0.0093555	-0.0494347	0.0374031	0.0510747	-0.118985	0.0565124	0.212299	-0.0937625	-0.487963	-0.426144	-0.551252	-0.606128	-0.437791			-0.289535	0.378826	0.0257846	-1.03989	4.28403	-1.75662	0.36552	-3.32963	-1.47495	2.75667	-1.44165	4.20424	-0.126687	0.29358	0.099549	-0.277726
HRVS4	-0.158477	-0.0562235	0.00091122	-0.016391	-0.0415609	-0.0536288	-0.0870548	-0.113423	-0.144122	-0.154793	-0.103424	-0.147326	-0.151256	-0.102462	-0.418761	-0.428244	-0.309125			-0.645226	-1.01621	-18.988	1.53559	0.290368	0.623284	0.302896	0.270655	0.0740415	-0.331858	0.424492	0.0266715	-0.322591	3.08699	0.0226452	-0.278158
HRVS5	-0.0723568	-0.085891	-0.0114173	-0.0135064	-0.0427149	-0.0391315	-0.0584429	-0.0606337	-0.0601343	-0.080583	-0.0448081	-0.147804	-0.128994	-0.149239	-0.161158	-0.181935	-0.109809			0.187048	-0.867072	0.182978	2.16257	-0.0838908	0.4935	0.0374849	-0.00823615	0.340051	-0.443951	2.2986	-0.127262	0.156947	0.0798657	0.128918	-0.396437
HRVS6	-0.353967	-0.380071	-0.391978	-0.369082	-0.39551	-0.42138	-0.466301	-0.501326	-0.541015	-0.548549	-0.54374	-0.457651	-0.552633	-0.31327	-0.458103	-0.664686	-0.490145			0.0737468	0.0313299	-0.0584122	0.0716064	0.0654085	0.106603	0.075113	0.0791692	0.0139243	-0.00876639	-0.158327	0.207542	-0.433132	0.462328	0.450951	-0.262591
HRVS7	-0.0531772	0.0357429	-0.0740263	0.0166782	0.0697222	0.0607379	-0.161732	-0.341729	-0.368681	-0.360833	-0.333897	-0.519103	-0.406707	-0.436076	-0.540268	-0.595004	-0.454056			-1.67215	-3.07108	-1.2253	3.18045	-0.12886	-3.66278	1.11294	0.0788687	-0.0212872	-0.074649	0.55468	-0.216519	0.0722121	0.23893	0.101312	-0.236885
HRVS8	0.0282986	0.00201476	0.025138	0.00818912	-0.0035632	-0.0228991	-0.0185038	-0.0338223	-0.0403561	-0.0382961	-0.0270418	-0.444288	-0.460658	0.0525885	-0.0579712	-0.487053	-0.288458			-0.928804	11.477	-0.674234	-1.43511	5.42656	-0.191942	0.827859	0.193177	-0.0510449	-0.293875	15.4297	0.0368465	-1.11416	-2.10236	7.40162	-0.407747
HRVS9	-0.342888	-0.456427	-0.390536	-0.45935	-0.420858	-0.431189	-0.389814	-0.389888	-0.416973	-0.425235	-0.412907	-0.432197	-0.400408	-0.575824	-0.455429	-0.388004	-0.349941			0.331124	-0.144362	0.176204	-0.0837979	0.024549	-0.0959566	0.000190417	0.0694692	0.0198144	-0.028992	0.0467174	-0.0735527	0.438096	-0.209084	-0.148046	-0.0980986
HRVS10	-0.185013	-0.184092	-0.127003	-0.150958	-0.137859	-0.116646	-0.190208	-0.285594	-0.315388	-0.322382	-0.308386	-0.219817	-0.274677	-0.400783	-0.226605	-0.298737	-0.235283			-0.00497875	-0.310113	0.188617	-0.0867677	-0.15388	0.630652	0.501481	0.104323	0.0221745	-0.0434135	-0.287203	0.249572	0.459106	-0.434595	0.31832	-0.212407
HRVS11	-0.430935	-0.428186	-0.381316	-0.467394	-0.50421	-0.513189	-0.61708	-0.652572	-0.680136	-0.695156	-0.684329	-0.398482	-0.677688	-0.66569	-0.6775	-0.756327	-0.662432			-0.00638017	-0.109461	0.225739	0.078769	0.0178071	0.202443	0.0575152	0.0422391	0.0220841	-0.0155746	-0.417704	0.700675	-0.0177038	0.0177402	0.11635	-0.124146
HRVS12	-0.231529	-0.265635	-0.190963	-0.335846	-0.498783	-0.591997	-0.564289	-0.575706	-0.57908	-0.559906	-0.567661	-0.55867	-0.588951	-0.579362	-0.590285	-0.646113	-0.591337			0.147305	-0.281107	0.758699	0.485154	0.186883	-0.0468051	0.0202332	0.00585956	-0.0331109	0.0138517	-0.0158387	0.0542013	-0.0162815	0.018854	0.0945778	-0.0847774
HRVS13	0.149562	0.0334937	0.117643	0.121431	0.114994	0.107201	0.122312	0.0873966	0.0450204	0.04407	0.0967392	-0.421772	-0.23408	-0.273696	-0.402017	-0.416039	-0.342988			-0.776056	2.51241	0.0321967	-0.0530126	-0.067768	0.14096	-0.28546	-0.484873	-0.0211097	1.19512	-5.35989	-0.445008	0.169241	0.468843	0.0348795	-0.175589
HRVS14	-0.462773	-0.405211	-0.348202	-0.392696	-0.424344	-0.429287	-0.410829	-0.394801	-0.414137	-0.402795	-0.416855	-0.459871	-0.406282	-0.498618	-0.517135	-0.513447	-0.332726			-0.124385	-0.14069	0.127783	0.0805899	0.011649	-0.0429957	-0.0390139	0.0489756	-0.0273863	0.0349057	0.103191	-0.116531	0.227271	0.0371373	-0.00713181	-0.351977
HRVS15	-0.387928	-0.47332	-0.364452	-0.369368	-0.38719	-0.359718	-0.249141	-0.306093	-0.324483	-0.294413	-0.322657	-0.352146	-0.425435	-0.358243	-0.164018	-0.335971	-0.209212			0.220124	-0.230009	0.0134894	0.0482487	-0.0709513	-0.3074	0.228594	0.0600796	-0.0926691	0.0959332	0.0913939	0.208121	-0.157937	-0.54216	1.04838	-0.377292
HRVS16	0.115232	0.0926767	0.110513	0.0888434	0.0677901	0.0565734	0.0505688	-0.0114931	-0.0194811	-0.0616405	-0.038795	-0.0873143	-0.0110967	0.015297	-0.0969467	-0.0948704	0.0132782			-0.195737	0.192458	-0.196082	-0.236971	-0.165462	-0.106139	-1.22728	0.69503	2.16411	-0.370624	1.25066	-0.872911	-2.37852	-7.33763	-0.0214164	-1.13996
HRVS17	0.337983	0.320951	0.327691	0.354109	0.295958	0.211997	0.213276	0.0797774	0.0106784	0.0245853	0.154485	-0.410188	0.188232	0.246316	0.00217139	-0.097105	0.122665			-0.050394	0.021	0.0806189	-0.164218	-0.283693	0.00603599	-0.625944	-0.866148	1.30234	5.28362	-3.65519	-1.45889	0.308577	-0.991185	-45.7202	-2.26322
HRVS18	0.296924	0.287047	0.317496	0.278119	0.252041	0.225683	0.235816	0.109611	0.114084	-0.0681852	0.0196649	-0.183542	0.166809	0.280673	-0.130823	-0.189585	0.249239			-0.0332669	0.10608	-0.124026	-0.0937639	-0.104579	0.044899	-0.535183	0.0408046	-1.59768	-1.2884	-10.3335	-1.90883	0.682608	-1.46611	0.44917	-2.31465
HRVS19	0.232393	0.201239	0.205155	0.177265	0.15354	0.146613	0.170091	0.121461	0.070174	0.079883	0.180244	-0.168239	0.100663	0.11904	-0.118407	-0.0060603	0.0958883			-0.134057	0.0194565	-0.135946	-0.133838	-0.045118	0.160138	-0.285903	-0.422252	0.138356	1.25635	-1.93339	-1.59833	0.182565	-1.99468	-0.948818	-16.8224
HRVS20	0.383269	0.36357	0.433065	0.435348	0.406141	0.381052	0.379241	0.434586	0.398004	0.369751	0.416772	0.278644	0.425729	0.318846	0.360666	0.179328	0.268017			-0.0513979	0.191146	0.0052706	-0.0670873	-0.0617745	-0.00475389	0.145936	-0.0841756	-0.0709862	0.127168	-0.331424	0.527862	-0.25106	0.131162	-0.502787	0.494567
HRVS21	0.219613	0.306452	0.228559	0.252256	0.120262	-0.0789686	0.0759715	0.156191	0.182877	0.19781	0.279597	-0.192817	-0.384281	-0.339343	-0.565987	-0.670612	-0.549396			0.395417	-0.254179	0.103683	-0.523254	-1.65664	-1.96205	1.05592	0.170855	0.081656	0.413458	-1.68963	0.992979	-0.116941	0.667891	0.184855	-0.180755
HRVS22	0.132213	0.124536	0.161442	0.15248	0.163193	0.141333	0.193136	0.210028	0.195095	0.161327	0.163332	0.120047	0.255883	0.157202	0.0915604	0.133912	0.236568			-0.0580633	0.296342	-0.0555094	0.0702572	-0.133949	0.36653	0.0874593	-0.0710996	-0.173084	0.0124294	-0.265013	1.13152	-0.38565	-0.417561	0.462557	0.766593
HRVS23	-0.437653	-0.447781	-0.431892	-0.394974	-0.320569	-0.366797	-0.430004	-0.497185	-0.528705	-0.537398	-0.540317	-0.556063	-0.118477	-0.151893	-0.0552097	-0.0695504	-0.00824315			0.0231433	-0.0354847	-0.0854803	-0.18838	0.144206	0.172322	0.156235	0.0633956	0.0164423	0.00543243	0.0291416	-0.786936	0.282047	-0.636523	0.25975	-0.88148
HRVS24	-0.393004	-0.429706	-0.312	-0.341697	-0.312967	-0.294703	-0.30492	-0.318688	-0.340954	-0.350626	-0.345133	-0.317852	-0.303038	-0.31752	-0.454511	-0.556942	-0.370607			0.0933886	-0.273924	0.0951831	-0.0840785	-0.0583568	0.0346674	0.0451518	0.0698691	0.0283663	-0.0156648	-0.079045	-0.0466081	0.0477888	0.431443	0.225364	-0.334568
HRVS25	-0.136131	-0.108009	-0.130779	-0.114063	-0.145198	-0.15036	-0.145953	-0.166409	-0.170639	-0.181227	-0.18044	-0.194831	-0.189863	-0.113246	-0.14545	-0.203893	-0.145549			-0.206578	0.210812	-0.127812	0.272959	0.0355501	-0.0293061	0.140152	0.0254174	0.0620503	-0.00434297	0.0797535	-0.0254961	-0.403541	0.284377	0.401807	-0.286151
HRVS26	0.0498317	-0.0198903	0.0807978	0.0994451	0.201293	0.123104	-0.1496	-0.282361	-0.33428	-0.334191	-0.294958	-0.66818	-0.0190324	0.0583158	0.161988	0.0125532	0.269508			-1.39915	-5.06217	0.230789	1.02416	-0.388433	-2.21523	0.887445	0.183872	-0.000265921	-0.117398	1.26534	-0.971516	-4.06404	1.77777	-0.922506	20.4693
HRVS27	0.321326	0.285545	0.338319	0.350037	0.320664	0.301944	0.316208	0.266141	0.203679	0.19532	0.275687	-0.124114	0.166246	0.275287	-0.0681828	0.067709	0.191175			-0.111354	0.184816	0.0346374	-0.0839145	-0.0583798	0.0472432	-0.158337	-0.234694	-0.0410407	0.41146	-1.4502	-2.33947	0.655904	-1.24768	-1.99305	1.82349
HRVS28	0.569336	0.568337	0.582669	0.564631	0.552292	0.529692	0.536545	0.457813	0.459286	0.348344	0.37821	0.202308	0.454679	0.507621	0.275703	0.14352	0.460973			-0.00175315	0.0252164	-0.0309569	-0.0218532	-0.0409205	0.012937	-0.146738	0.00321766	-0.241554	0.0857361	-0.46509	1.24746	0.116439	-0.456872	-0.47944	2.21191
HRVS29	0.297743	0.393666	0.308945	0.310754	0.235326	0.079366	0.26267	0.335858	0.364169	0.366965	0.422862	0.104596	-0.0581462	0.00470012	-0.269195	-0.414321	-0.243311			0.322169	-0.215211	0.00585597	-0.242727	-0.66274	2.3096	0.278632	0.0842923	0.00767992	0.15232	-0.752648	-1.55591	-1.08083	-58.2741	0.53911	-0.412746
HRVS30	0.471743	0.447699	0.499776	0.494371	0.466799	0.448116	0.470575	0.408063	0.324803	0.324676	0.445679	-0.288919	0.290118	0.451031	-0.12396	0.177207	0.36438			-0.0509701	0.116322	-0.0108147	-0.0557714	-0.0400241	0.0501195	-0.132842	-0.204037	-0.000391253	0.372689	-1.64827	-2.00415	0.554645	-1.27484	-2.42955	1.05623
HRVS31	-0.0813951	-0.128693	-0.0476356	-0.0723916	-0.116578	-0.13876	-0.196815	-0.26745	-0.281811	-0.271969	-0.242315	-0.287539	-0.140242	-0.199986	-0.103475	-0.149597	-0.0298569			0.581095	-0.629852	0.519696	0.610378	0.190277	0.418388	0.358886	0.0536953	-0.0349235	-0.109032	0.186631	-0.512269	0.42601	-0.482589	0.445732	-0.800418
HRVS32	0.110374	0.0948859	0.143701	0.140839	0.140352	0.115792	0.078909	-0.185719	-0.159343	-0.120997	-0.0798585	-0.32395	0.0640834	0.118607	-0.090709	0.0153582	0.0751264			-0.140324	0.514459	-0.0199128	-0.00346088	-0.174989	-0.318528	-3.35359	-0.142023	-0.240651	-0.339995	3.05655	-1.19782	0.850817	-1.76479	-1.16931	3.89163
HRVS33	-0.286716	-0.192086	-0.223624	-0.36372	-0.373932	-0.444771	-0.520601	-0.57294	-0.602059	-0.578247	-0.562888	-0.660972	-0.340754	-0.461008	-0.0267373	-0.188792	-0.0318592			-0.330049	0.164189	0.626482	0.0280741	0.189445	0.170492	0.100537	0.0508225	-0.0395498	-0.026562	0.174252	-0.484465	0.352905	-0.942002	6.06101	-0.831247
HRVS34	0.121599	0.09873	0.158084	0.158884	0.141794	0.121006	0.11684	0.162727	0.0920986	0.0843876	0.0614781	-0.430984	0.181412	0.0542133	-0.0111716	-0.302352	0.121783			-0.18807	0.601174	0.0050632	-0.107567	-0.146606	-0.0344268	0.392732	-0.434029	-0.083726	-0.271479	-8.01036	-1.42093	-0.70116	-1.20607	26.0645	-1.40279
HRVS35	-0.0262303	-0.0235388	-0.0070886	-0.00562505	-0.00524183	-0.00583585	-0.00434191	-0.00626408	-0.00745006	-0.00901291	-0.0254477	-0.0356135	-0.0277416	-0.0299726	-0.0383439	-0.0304388	-0.0280259			-0.102611	-0.698855	-0.206464	-0.0681283	0.113323	-0.255994	0.442703	0.189331	0.209776	1.82348	0.399478	-0.221038	0.0804195	0.279299	-0.206162	-0.0792723
HUNS1	0.0945194	0.0663708	-0.084901	-0.0971773	-0.0715079	-0.0305953	-0.0687169	-0.0353955	-0.0524069	0.0125902	-0.062397	-0.256606	-0.300489	-0.338915	-0.47265	-0.459023	-0.233731			-0.297808	-2.27919	0.144596	-0.26415	-0.572142	1.246	-0.484909	0.480609	-1.24024	-5.956	3.11248	0.171009	0.127879	0.3946	-0.0288311	-0.490809
HUNS2	-0.410432	-0.0680831	0.0369824	-0.0694182	-0.0766093	-0.132862	-0.282198	-0.236055	-0.281117	-0.211212	-0.351999	-0.232814	-0.202514	-0.146177	-0.199191	-0.179805	-0.176929			-0.834119	-1.54319	-2.87706	0.103591	0.734285	1.12399	-0.163513	0.190896	-0.248668	0.666568	-0.338597	-0.130144	-0.278187	0.362669	-0.0973245	-0.0159978
HUNS3	-0.0271193	-0.0414268	-0.115747	-0.10973	-0.129382	-0.13824	-0.183715	-0.153486	-0.162337	-0.151331	-0.144414	-0.207731	-0.23423	-0.374989	-0.37606	-0.346998	-0.24964			0.527575	1.79401	-0.0519831	0.179094	0.0684633	0.328961	-0.164546	0.0576666	-0.0677933	-0.0457086	0.43844	0.127565	0.600939	0.00285839	-0.0772801	-0.280573
HUNS4	-0.31823	-0.283479	-0.301061	-0.241968	-0.350955	-0.338551	-0.342099	-0.329	-0.330176	-0.352479	-0.307777	-0.314258	-0.2776	-0.26285	-0.312268	-0.245671	-0.196814			-0.109201	0.0620236	-0.196282	0.450418	-0.0353458	0.0104818	-0.0382909	0.00357486	0.0675484	-0.126821	0.0210582	-0.116649	-0.0531358	0.188008	-0.213269	-0.19887
HUNS5	-0.0582311	-0.0630632	-0.187582	-0.206632	-0.113232	-0.108324	-0.113123	-0.105665	-0.110066	-0.101131	-0.0986035	-0.112875	-0.0878177	-0.0906833	-0.116235	-0.112782	-0.0952867			0.0829827	1.97451	0.101551	-0.452008	-0.0433494	0.0443008	-0.0659225	0.0416489	-0.0811814	-0.0249911	0.144734	-0.22199	0.0326318	0.281771	-0.0297107	-0.155123
HUNS6	-0.12007	-0.104401	-0.0858739	-0.098743	-0.109309	-0.114354	-0.156008	-0.125171	-0.12157	-0.152401	-0.236006	-0.230598	-0.137202	-0.169255	-0.167495	-0.150889	-0.176587			-0.130499	-0.17746	0.149861	0.107003	0.046153	0.364261	-0.197666	-0.028765	0.253606	0.548584	-0.0229134	-0.405018	0.233618	-0.0103965	-0.0991452	0.170313
HUNS7	-0.234493	-0.208113	-0.159903	-0.191941	-0.138943	-0.124712	-0.146935	-0.194531	-0.20186	-0.224081	-0.2351	-0.207255	-0.329363	-0.459539	-0.477554	-0.505795	-0.604649			-0.112497	-0.231653	0.200356	-0.276115	-0.102426	0.178197	0.323924	0.0376754	0.110082	0.0491774	-0.11844	0.58917	0.395233	0.0392026	0.0591367	0.195443
HUNS8	0.0502185	0.0175243	0.152538	0.0122418	0.0183367	-0.068563	-0.234204	-0.202941	-0.228368	-0.179142	-0.272266	-0.228932	-0.151403	-0.191938	-0.246099	-0.129582	-0.21499			-0.651039	7.70437	-0.919746	0.497871	-4.73912	2.41589	-0.133486	0.125294	-0.215558	0.519835	-0.15916	-0.338654	0.267727	0.282182	-0.473457	0.659104
HUNS9	-0.399544	-0.468963	-0.433813	-0.514044	-0.51197	-0.529337	-0.601394	-0.571371	-0.598572	-0.572502	-0.598999	-0.543205	-0.371955	-0.52432	-0.534235	-0.481502	-0.519916			0.173745	-0.0749523	0.184945	-0.00403559	0.0339229	0.136125	-0.0499221	0.0476076	-0.0435545	0.0462837	-0.093146	-0.315259	0.409635	0.0189103	-0.0987088	0.0797796
HUNS10	-0.562656	-0.548044	-0.489011	-0.488428	-0.535618	-0.549152	-0.56026	-0.539689	-0.545768	-0.536452	-0.524075	-0.562773	-0.579366	-0.538851	-0.55172	-0.554922	-0.596426			-0.0259698	-0.107717	-0.00119183	0.0966159	0.0252685	0.0202271	-0.0367174	0.0112651	-0.0170695	-0.0230729	0.0738413	0.0294849	-0.06993	0.0238824	0.0058024	0.0747936
HUNS11	-0.00616814	-0.241118	-0.244758	-0.375418	-0.417443	-0.436389	-0.535711	-0.523111	-0.536786	-0.533567	-0.550591	-0.57133	-0.379135	-0.567713	-0.5142	-0.467208	-0.40705			38.0909	0.0150956	0.533831	0.111943	0.0453853	0.2276	-0.0235194	0.0261415	-0.00599675	0.0319056	0.0376672	-0.336398	0.497388	-0.0942593	-0.0913887	-0.128762
HUNS12	-0.664127	-0.655299	-0.598152	-0.63545	-0.661683	-0.653111	-0.64808	-0.681752	-0.642892	-0.685724	-0.665349	-0.689273	-0.643941	-0.681859	-0.65905	-0.620635	-0.661168			-0.0132913	-0.0872082	0.062356	0.0412817	-0.0129549	-0.00770284	0.0519569	-0.0570005	0.0666246	-0.0297132	0.0359562	-0.0657674	0.0588842	-0.0334507	-0.0582895	0.0653101
HUNS13	-0.651084	-0.661464	-0.712079	-0.671516	-0.681903	-0.688676	-0.683469	-0.681021	-0.68376	-0.669805	-0.611587	-0.710068	-0.627947	-0.717118	-0.671273	-0.630602	-0.694836			0.0159433	0.0765195	-0.0569648	0.0154681	0.00993285	-0.00756028	-0.00358173	0.00402185	-0.0204103	-0.086917	0.161025	-0.115652	0.142004	-0.0639304	-0.0605874	0.101862
HUNS14	-0.774945	-0.755505	-0.726594	-0.720563	-0.72078	-0.724888	-0.731034	-0.72643	-0.715798	-0.726027	-0.735959	-0.782449	-0.735946	-0.823865	-0.836961	-0.824113	-0.870691			-0.0250864	-0.0382665	-0.00830006	0.000300525	0.00569991	0.00847892	-0.00629924	-0.0146358	0.0142907	0.0136797	0.0631701	-0.0594332	0.119464	0.0158968	-0.0153507	0.0565179
HUNS15	-0.874315	-0.852749	-0.868474	-0.871084	-0.869527	-0.879526	-0.890232	-0.897426	-0.890578	-0.895088	-0.897463	-0.898095	-0.872111	-0.898559	-0.914951	-0.902917	-0.88931			-0.0246663	0.0184403	0.00300524	-0.00178755	0.0115001	0.012172	0.00808084	-0.00763061	0.00506435	0.00265303	0.000704261	-0.0289323	0.0303262	0.018243	-0.0131523	-0.0150704
HUNS16	-0.242716	-0.23706	-0.154779	-0.215546	-0.16481	-0.283348	-0.305545	-0.18334	-0.189273	-0.170607	-0.169876	-0.35178	-0.247232	-0.332184	-0.29325	-0.260519	-0.277034			-0.0233046	-0.34709	0.39261	-0.235383	0.719233	0.0783411	-0.399957	0.0323607	-0.0986183	-0.00428672	1.0708	-0.297197	0.343611	-0.117205	-0.111614	0.0633927
HUNS17	-0.108653	-0.0222919	0.125483	0.0542044	-0.155053	-0.0935713	-0.208599	-0.198609	-0.247084	-0.220468	-0.325009	-0.300144	-0.313031	-0.352902	-0.288637	-0.288017	-0.425085			-0.794833	-6.6291	-0.568035	-3.86052	-0.396519	1.22931	-0.0478903	0.244073	-0.107722	0.474175	-0.0765046	0.0429356	0.12737	-0.182102	-0.00214922	0.475903
HUNS18	-0.183115	-0.15192	-0.0967122	-0.132025	-0.169482	-0.172592	-0.183128	-0.189767	-0.180603	-0.206629	-0.203358	-0.22353	-0.17871	-0.229994	-0.220215	-0.163779	-0.233426			-0.170359	-0.3634	0.365135	0.283706	0.0183498	0.0610495	0.0362517	-0.0482886	0.144104	-0.0158319	0.0991958	-0.200509	0.286966	-0.0425166	-0.256279	0.425253
HUNS19	-0.203262	-0.2022	-0.037141	-0.113636	-0.0956258	-0.169384	-0.204691	-0.250879	-0.210151	-0.267633	-0.239874	-0.295328	-0.336506	-0.429725	-0.368192	-0.459289	-0.521489			-0.00522356	-0.816316	2.05959	-0.158491	0.771323	0.208444	0.225645	-0.16234	0.273524	-0.103719	0.231181	0.139429	0.27702	-0.14319	0.247415	0.135427
HUNS20	-0.322728	-0.29561	-0.119041	-0.239144	-0.186823	-0.183536	-0.154361	-0.238241	-0.134552	-0.358329	-0.319836	-0.383639	-0.306129	-0.47597	-0.504672	-0.601754	-0.677895			-0.0840277	-0.597306	1.00893	-0.218785	-0.017591	-0.158962	0.5434	-0.435226	1.66312	-0.107423	0.199484	-0.202038	0.554803	0.0603023	0.192367	0.126531
HUNS21	-0.115055	-0.0837753	-0.0190092	-0.0579754	-0.0909246	-0.230478	-0.224133	-0.163116	-0.177772	-0.164339	-0.108719	-0.136044	-0.0927904	-0.112329	-0.125955	-0.143514	-0.117894			-0.271864	-0.773093	2.04987	0.568329	1.53482	-0.027529	-0.272237	0.0898541	-0.0755658	-0.338444	0.251337	-0.317941	0.210563	0.12131	0.139401	-0.178519
HUNS22	-0.233022	-0.212004	-0.175655	-0.21656	-0.243176	-0.24686	-0.257485	-0.275367	-0.268703	-0.280917	-0.2667	-0.326272	-0.31101	-0.3148	-0.30027	-0.32456	-0.339971			-0.0901972	-0.171456	0.232876	0.122904	0.0151469	0.0430405	0.0694481	-0.0241985	0.0454539	-0.0506098	0.223369	-0.0467777	0.0121874	-0.0461551	0.0808918	0.0474829
HUNS23	-0.140193	-0.184717	0.0107808	-0.112184	-0.0801662	-0.198788	-0.270538	-0.363452	-0.283705	-0.395122	-0.367919	-0.43801	-0.392294	-0.435731	-0.362554	-0.400933	-0.525582			0.31759	-1.05836	-11.4059	-0.285408	1.4797	0.360938	0.343441	-0.219416	0.392722	-0.0688474	0.190508	-0.104373	0.110726	-0.167941	0.105859	0.310897
HUNS24	-0.0719409	-0.076027	-0.066742	-0.109537	-0.117897	-0.126272	-0.137116	-0.129698	-0.128276	-0.14658	-0.122006	-0.125852	-0.085276	-0.0641745	-0.0579656	-0.066457	-0.0557759			0.0567972	-0.122127	0.641198	0.0763264	0.0710329	0.0858814	-0.0540991	-0.0109709	0.142693	-0.167647	0.0315206	-0.322409	-0.24745	-0.0967501	0.14649	-0.160722
HUNS25	-0.126707	-0.144807	-0.105609	-0.169035	-0.194658	-0.187637	-0.202967	-0.202606	-0.218197	-0.224591	-0.379289	-0.37346	-0.274086	-0.181205	-0.208305	-0.137918	-0.209316			0.142848	-0.270693	0.600572	0.15159	-0.0360713	0.0817023	-0.00178026	0.0769532	0.0293026	0.688799	-0.0153664	-0.26609	-0.338877	0.149557	-0.337906	0.517689
HUNS26	-0.0587529	-0.0503546	0.166693	0.0778271	0.088709	-0.063465	-0.121548	-0.167591	-0.117113	-0.216942	-0.169074	-0.271605	-0.191189	-0.285758	-0.211243	-0.243534	-0.334081			-0.142942	-4.31038	-0.533111	0.139821	-1.71543	0.915193	0.378805	-0.301198	0.852424	-0.220648	0.606426	-0.296078	0.494634	-0.26076	0.152859	0.371808
HUNS27	-0.221349	-0.196247	-0.141602	-0.181404	-0.208645	-0.185095	-0.19788	-0.230867	-0.233457	-0.25189	-0.229992	-0.268058	-0.241927	-0.290658	-0.27782	-0.266828	-0.274499			-0.113405	-0.278451	0.281082	0.150167	-0.11287	0.0690726	0.166703	0.0112198	0.0789538	-0.0869314	0.165509	-0.0974826	0.201426	-0.0441674	-0.039566	0.02875
HUNS28	-0.147459	-0.116833	0.0325117	-0.0191543	-0.0797776	-0.0886811	-0.121422	-0.174527	-0.187368	-0.250139	-0.242841	-0.232022	-0.196914	-0.271528	-0.299751	-0.300215	-0.295724			-0.207692	-1.27828	-1.58915	3.16499	0.111604	0.369202	0.437353	0.0735785	0.335012	-0.0291732	-0.0445547	-0.151312	0.378915	0.103942	0.00154839	-0.0149597
HUNS29	-0.220801	-0.174769	-0.049783	-0.12794	-0.185912	-0.185057	-0.212297	-0.256091	-0.238372	-0.315352	-0.313028	-0.332778	-0.291088	-0.363913	-0.37383	-0.351768	-0.378891			-0.208475	-0.71515	1.56995	0.453123	-0.00460055	0.147197	0.206288	-0.0691914	0.322942	-0.00737048	0.0630934	-0.125279	0.250184	0.0272503	-0.0590164	0.0771036
HUNS30	-0.302411	-0.220764	-0.0856143	-0.220074	-0.336136	-0.350926	-0.399881	-0.46355	-0.429714	-0.511007	-0.518028	-0.554565	-0.509883	-0.548235	-0.540931	-0.515523	-0.506689			-0.269985	-0.612191	1.57052	0.527382	0.043999	0.139501	0.15922	-0.0729918	0.189177	0.0137404	0.0705306	-0.080572	0.0752188	-0.0133232	-0.0469704	-0.0171373
HUNS31	-0.1836	-0.180416	-0.151491	-0.17813	-0.16561	-0.177105	-0.192816	-0.213956	-0.21457	-0.229328	-0.214435	-0.200622	-0.189562	-0.207731	-0.204267	-0.236459	-0.250917			-0.0173389	-0.160326	0.175846	-0.070289	0.0694131	0.0887077	0.109641	0.00287021	0.0687763	-0.0649384	-0.0644182	-0.0551292	0.0958497	-0.0166745	0.157595	0.0611458
HUNS32	-0.154964	-0.150554	-0.138813	-0.153677	-0.162123	-0.171368	-0.17666	-0.199719	-0.197	-0.249583	-0.230068	-0.254199	-0.238716	-0.251504	-0.228838	-0.250727	-0.250986			-0.0284572	-0.0779836	0.107077	0.0549597	0.0570261	0.0308788	0.130531	-0.0136175	0.266921	-0.0781889	0.104882	-0.0609075	0.0535689	-0.0901197	0.0956507	0.00103321
HUNS33	-0.0890008	-0.0962399	-0.0769403	-0.0817551	-0.0857083	-0.117153	-0.122985	-0.126142	-0.119258	-0.129149	-0.118843	-0.118121	-0.0938805	-0.104479	-0.0936226	-0.0872782	-0.0811791			0.0813374	-0.200536	0.062578	0.0483542	0.366884	0.0497752	0.0256745	-0.0545772	0.0829378	-0.0797943	-0.00607456	-0.20522	0.112888	-0.103905	-0.0677657	-0.0698816
HUNS34	-0.216886	-0.179854	-0.175159	-0.214366	-0.237955	-0.268224	-0.285246	-0.307795	-0.284584	-0.343249	-0.327136	-0.378129	-0.34713	-0.377588	-0.367865	-0.358479	-0.379813			-0.170744	-0.0261023	0.223831	0.110042	0.127205	0.0634612	0.0790542	-0.0754107	0.206141	-0.0469434	0.155878	-0.0819792	0.0877421	-0.0257494	-0.0255147	0.0595117
HUNS35	-0.0285714	-0.0298792	-0.0285714	-0.0285714	-0.0285714	-0.0285714	-0.0285714	-0.0285714	-0.0285714	-0.0285714	-0.0285714	-0.0285714								0.0457715	-0.0437681	2.18575e-15	3.04437e-09	9.46657e-10	4.81568e-09	-5.02407e-09	-3.78171e-09	2.53827e-09	7.98953e-09	1.93239e-07	-1	#DIV/0!	#DIV/0!	#DIV/0!	#DIV/0!
INOS1	0.530774	0.354434	0.650017	0.653817	0.573038	0.570551	0.536495	0.634419	0.436381	0.5169	0.522235	0.60224	0.648463	0.737371	0.587647	0.573302	0.339371			-0.332232	0.833959	0.00584547	-0.123549	-0.00433994	-0.0596906	0.182527	-0.312157	0.184516	0.0103211	0.153197	0.0767522	0.137106	-0.203052	-0.02441	-0.408041
INOS2	-0.302203	-0.425153	0.056135	0.087289	0.107578	0.117191	-0.12643	0.192729	0.0759132	0.0926559	0.317227	0.535807	0.450377	0.473846	-0.0149543	-0.159539	0.00319351			0.406846	-1.13203	0.554984	0.23244	0.0893582	-2.07883	-2.5244	-0.606114	0.220551	2.42371	0.689034	-0.159442	0.0521098	-1.03156	9.66845	-1.02002
INOS3	0.12608	-0.216718	0.283261	0.278514	0.103495	0.0982171	0.0177401	0.236069	-0.198536	-0.0686726	-0.0571231	0.112537	0.3418	0.451289	0.102658	0.016704	-0.28323			-2.7189	-2.30704	-0.0167581	-0.628402	-0.0509985	-0.819379	12.3071	-1.84101	-0.654106	-0.168183	-2.97008	2.03722	0.32033	-0.772524	-0.837285	-17.9558
INOS4	-0.334609	-0.206609	-0.129082	-0.180932	-0.18981	-0.193093	-0.206786	-0.176576	-0.197194	-0.197594	-0.163112	0.0314693	-0.0281265	-0.00326459	-0.14911	-0.146644	-0.218131			-0.382536	-0.375236	0.401685	0.0490647	0.0172967	0.0709174	-0.146092	0.116761	0.00203013	-0.174511	-1.19293	-1.89378	-0.883932	44.6748	-0.0165341	0.487487
INOS5	-0.144728	-0.0696474	-0.0531172	-0.0760528	-0.069045	-0.0648806	-0.0963457	-0.0755831	-0.11885	-0.341591	-0.0829335	-0.0562477	-0.0466975	-0.0556712	-0.196171	-0.161574	-0.208128			-0.518772	-0.23734	0.431791	-0.0921436	-0.0603146	0.48497	-0.215502	0.572438	1.87415	-0.757214	-0.321774	-0.169788	0.192167	2.52375	-0.176364	0.288131
INOS6	0.096632	0.108122	0.198159	0.153499	0.113789	0.102892	0.0354086	0.187642	0.196506	0.191839	0.283373	0.384825	0.35813	0.414249	0.072658	-0.02888	0.0412984			0.11891	0.832726	-0.225375	-0.258701	-0.0957644	-0.655865	4.29934	0.0472374	-0.0237493	0.477137	0.358018	-0.0693683	0.156699	-0.824603	-1.39748	-2.43
INOS7	0.223832	0.134007	0.320162	0.268534	0.265465	0.263597	0.201629	0.266827	0.192159	0.243639	0.269028	0.201388	-0.469869	-0.181336	-0.373292	0.0491014	-0.11034			-0.401309	1.38915	-0.161254	-0.0114292	-0.00703912	-0.235087	0.323361	-0.279837	0.267901	0.104209	-0.251425	-3.33316	-0.614072	1.05857	-1.13154	-3.2472
INOS8	0.466324	0.329479	0.409672	0.326291	0.334221	0.347885	0.252407	0.36942	0.286978	-0.488961	-0.313542	0.405105	0.475275	0.49613	0.178788	0.171029	0.238093			-0.293455	0.243395	-0.203531	0.0243037	0.0408822	-0.274453	0.463591	-0.223167	-2.70383	-0.358758	-2.29203	0.173213	0.0438802	-0.639635	-0.0433991	0.392123
INOS9	-0.0209506	-0.0354753	0.200907	0.127955	0.082355	0.108457	0.0473206	0.155513	0.183489	0.167548	0.225991	-0.0518397	0.339436	0.42621	0.0948063	-0.256352	0.0144361			0.693281	-6.66328	-0.363111	-0.356376	0.316943	-0.563692	2.28637	0.179898	-0.0868759	0.348814	-1.22939	-7.54781	0.255641	-0.77756	-3.70396	-1.05631
INOS10	0.0073299	0.0470175	0.105449	0.0864625	0.0454931	0.0371621	-0.0331196	0.103546	0.144433	0.145324	0.246364	0.347314	0.375739	0.429639	0.0832417	-0.0394258	0.0219441			5.41448	1.24276	-0.180055	-0.47384	-0.183127	-1.89122	-4.12642	0.394873	0.00616786	0.69528	0.40976	0.0818416	0.14345	-0.806252	-1.47363	-1.55659
INOS11	0.318553	0.180188	0.254381	0.222699	0.192564	0.206486	0.138102	0.289764	0.284332	0.277405	0.360995	0.467785	0.439744	0.482963	0.146657	0.0443662	0.114079			-0.434354	0.411752	-0.124544	-0.13532	0.0722978	-0.33118	1.09819	-0.0187457	-0.0243623	0.301328	0.29582	-0.0599431	0.0982804	-0.696339	-0.697483	1.57129
INOS12	-0.507199	-0.375354	0.176079	0.305064	0.117043	0.213203	0.253646	0.26273	0.389134	0.379843	0.374691	0.554161	0.495565	0.232679	0.245774	0.152314	0.0685538			-0.259946	-1.4691	0.732538	-0.616332	0.821571	0.189691	0.0358173	0.481116	-0.023877	-0.0135622	0.478981	-0.105738	-0.530478	0.05628	-0.380269	-0.549917
INOS13	-0.152626	-0.201354	-0.132615	-0.123693	-0.122671	-0.124289	-0.141121	-0.0763693	0.0174359	0.019828	0.0686541	0.15869	0.130408	0.167023	-0.0173427	-0.0467533	-0.0224253			0.319262	-0.341387	-0.0672771	-0.00825988	0.0131883	0.135432	-0.45884	-1.22831	0.137194	2.46248	1.31145	-0.178226	0.280779	-1.10383	1.69585	-0.520349
INOS14	-0.480508	-0.416171	-0.0172448	-0.030866	-0.0499592	-0.0541022	-0.0802606	0.0233474	0.0568535	0.0669785	0.153666	0.263625	0.264912	0.317479	0.00228706	-0.171265	-0.0166312			-0.133894	-0.958563	0.789871	0.618585	0.0829279	0.483501	-1.29089	1.43511	0.178088	1.29427	0.715569	0.00488113	0.19843	-0.992796	-75.8844	-0.902892
INOS15	-0.254323	-0.322898	0.0170243	-0.00655778	-0.0292743	-0.0385264	-0.0603464	0.0212129	0.057738	0.0661887	0.129888	0.21417	0.186594	0.206352	-0.00550151	-0.463721	-0.022045			0.269639	-1.05272	-1.3852	3.46406	0.316049	0.566365	-1.35152	1.72183	0.146364	0.962396	0.648874	-0.128755	0.105883	-1.02666	83.2897	-0.952461
INOS16	0.0805682	0.042248	0.00881845	-0.00579139	-0.0108823	-0.00829892	-0.0163536	-0.00840901	-0.00160475	-0.00673235	0.0155063	0.0443958	0.0474284	0.0871298	0.00474734	-0.00916769	0.0103338			-0.475624	-0.79127	-1.65674	0.879051	-0.237395	0.970569	-0.4858	-0.809162	3.19525	-3.30326	1.86307	0.0683074	0.837081	-0.945514	-2.93112	-2.1272
INOS17	-0.233935	-0.285303	-0.0873658	0.00273196	-0.0524905	-0.0107307	-0.0141581	0.0165241	0.0345672	0.0442266	0.0459651	0.163672	0.157702	-0.0137911	-0.00787904	-0.0138255	-0.0129947			0.219582	-0.693779	-1.03127	-20.2135	-0.795568	0.319404	-2.16711	1.09193	0.279436	0.0393103	2.56078	-0.0364714	-1.08745	-0.428686	0.754716	-0.060088
INOS18	0.0203952	-0.146095	0.046657	0.0368589	0.000876171	-0.00735679	-0.0784333	0.12325	0.130674	0.127126	0.25883	0.407891	0.395941	0.48068	0.0733189	-0.123728	-0.000391562			-8.1632	-1.31936	-0.210003	-0.976229	-9.39652	9.66135	-2.5714	0.0602359	-0.0271495	1.03601	0.575901	-0.0292964	0.214018	-0.847468	-2.68754	-0.996835
INOS19	0.137438	-0.0792305	0.0767696	0.0562403	0.035551	0.0471073	-0.00931281	0.130181	0.131979	0.147633	0.240398	0.35182	0.339888	0.369382	0.0533444	-0.015596	0.0415483			-1.57648	-1.96894	-0.267415	-0.367874	0.325065	-1.19769	-14.9787	0.0138061	0.118612	0.62835	0.463489	-0.0339159	0.0867758	-0.855585	-1.29237	-3.66403
INOS20	0.31648	0.146524	0.444008	0.410862	0.404216	0.409046	0.336895	0.452734	0.30941	0.415717	0.4238	0.477704	0.566505	0.60144	0.332596	0.334305	0.180631			-0.537019	2.03027	-0.0746507	-0.0161773	0.0119512	-0.176389	0.343841	-0.316575	0.343582	0.0194426	0.127193	0.18589	0.0616677	-0.447001	0.00513954	-0.459683
INOS21	0.171693	-0.0824916	0.294299	0.253459	0.24575	0.258527	0.172615	0.304724	0.200817	0.276926	0.345387	0.389018	0.468031	0.509291	0.206822	0.207925	0.0853234			-1.48046	-4.56763	-0.138771	-0.0304157	0.0519932	-0.332315	0.76534	-0.340985	0.378993	0.247218	0.126325	0.20311	0.0881563	-0.593901	0.00533031	-0.589643
INOS22	0.254634	0.193988	0.155273	0.102679	0.0872074	0.0971367	0.0530342	0.168963	0.162475	0.163929	0.244132	0.338874	0.323897	0.353239	0.0586116	-0.0156873	0.0422853			-0.23817	-0.199572	-0.338719	-0.15068	0.113858	-0.454025	2.18592	-0.0383945	0.00894488	0.489255	0.38808	-0.0441964	0.0905896	-0.834074	-1.26765	-3.69551
INOS23	0.139364	-0.0872702	0.119408	0.0585403	0.0348052	0.0433884	-0.0150637	0.141455	0.163637	0.179833	0.28556	0.395285	0.388748	0.437728	0.0946976	0.0332801	0.112282			-1.6262	-2.36825	-0.509744	-0.405449	0.246605	-1.34718	-10.3905	0.156807	0.0989793	0.587915	0.384242	-0.0165363	0.125995	-0.783661	-0.648565	2.37384
INOS24	0.0538126	-0.103047	-0.0293275	-0.0377578	-0.0539573	-0.0572408	-0.0820146	0.0114211	0.04129	0.053678	0.12882	0.189683	0.188365	0.223681	-0.0217529	-0.0662428	-0.0257995			-2.91491	-0.715395	0.287451	0.429037	0.0608536	0.4328	-1.13926	2.61525	0.300026	1.39986	0.472461	-0.00694442	0.187486	-1.09725	2.04523	-0.610531
INOS25	-0.0146676	-0.00295915	0.0138489	0.00880828	0.00284444	0.01541	0.00637026	0.0724726	0.0824431	0.0805511	0.153401	0.252139	0.250475	0.175242	0.0138159	-0.0105285	0.0520449			-0.798253	-5.68003	-0.363973	-0.677072	4.41758	-0.586614	10.3767	0.137577	-0.0229496	0.904388	0.643667	-0.00660158	-0.300361	-0.921161	-1.76206	-5.94324
INOS26	-0.00386899	-0.0153551	0.0208049	0.0498143	0.0359643	0.0623823	0.0555916	0.148482	0.190866	0.188023	0.258249	0.342135	0.328815	0.326883	0.0692256	0.111234	0.17023			2.96875	-2.35492	1.39435	-0.278033	0.734561	-0.108857	1.67095	0.285448	-0.0148984	0.373499	0.324827	-0.0389315	-0.0058774	-0.788225	0.606833	0.530378
INOS27	0.132863	0.0145294	0.195116	0.150334	0.136483	0.146035	0.093019	0.162378	0.0980225	0.0775364	0.164291	0.264525	0.272942	0.316379	0.0384604	0.0503706	0.0874695			-0.890644	12.4291	-0.229514	-0.0921327	0.0699849	-0.363037	0.745646	-0.396332	-0.208994	1.11889	0.610096	0.0318222	0.159141	-0.878436	0.309675	0.73652
INOS28	0.304261	0.16438	0.254509	0.208972	0.18023	0.192647	0.148924	0.287079	0.208757	0.270803	0.34447	0.356272	0.403664	0.436542	0.179808	0.225877	0.123778			-0.459741	0.548298	-0.178919	-0.13754	0.0688955	-0.226959	0.927687	-0.272826	0.297219	0.27203	0.0342621	0.133022	0.0814477	-0.588109	0.256211	-0.45201
INOS29	0.184829	0.00804179	0.17543	0.110784	0.0992825	0.100944	0.0500938	0.132019	0.0423554	0.0969979	0.147575	0.113398	0.200066	0.23075	0.0327709	0.0368334	-0.0601738			-0.956491	20.8148	-0.368499	-0.103822	0.0167326	-0.503745	1.63543	-0.67917	1.29009	0.521429	-0.231594	0.764284	0.153367	-0.857981	0.12397	-2.63367
INOS30	-0.146811	-0.253428	-0.0849537	-0.0614078	-0.0939587	-0.0842007	-0.12849	0.0583021	0.115438	0.164106	0.265372	0.385634	0.378771	0.430783	0.0983935	0.0613914	0.117243			0.726224	-0.664782	-0.277162	0.530078	-0.103854	0.525996	-1.45375	0.979997	0.421595	0.617079	0.453182	-0.0177986	0.137318	-0.771593	-0.376063	0.909765
INOS31	0.0929816	0.0275328	0.0372258	0.00477391	-0.00939353	-0.00714472	-0.0456695	0.0382093	0.0445928	0.0516444	0.120465	0.190468	0.208471	0.242184	-0.0134548	-0.056716	-0.0182112			-0.70389	0.352052	-0.871758	-2.96768	-0.2394	5.39206	-1.83665	0.167067	0.158134	1.33258	0.581113	0.0945158	0.161719	-1.05556	3.21531	-0.678906
INOS32	0.0224767	-0.014769	0.0132302	-0.00179187	-0.00800409	-0.00889696	-0.0182695	0.0152118	0.0161777	0.0103708	0.0321473	0.0431939	0.0412705	0.0774494	0.0261911	0.0231366	-0.0105779			-1.65708	-1.89581	-1.13544	3.46689	0.111552	1.05345	-1.83263	0.0634959	-0.358947	2.0998	0.343622	-0.0445272	0.876627	-0.66183	-0.116626	-1.45719
INOS33	-0.010643	-0.0534224	-0.0393965	-0.0438294	-0.049253	-0.0548248	-0.0612179	-0.0368862	-0.0230487	-0.0174439	0.017882	0.0511771	0.0585331	0.0988843	-0.0132092	-0.0388908	-0.0263376			4.01947	-0.262547	0.112519	0.123744	0.113127	0.116608	-0.39746	-0.375139	-0.243172	-2.02511	1.86194	0.143736	0.689376	-1.13358	1.94422	-0.322782
INOS34	0.0440122	-0.115094	0.0379309	-0.0330054	-0.0469515	-0.042225	-0.0688407	-0.012599	0.0272849	0.0376699	0.0821897	0.126061	0.126564	0.156806	0.00853114	0.00288484	0.0198242			-3.61505	-1.32956	-1.87015	0.422538	-0.100668	0.630331	-0.816983	-3.16564	0.380613	1.18184	0.533779	0.00399453	0.238941	-0.945594	-0.661846	5.87186
INOS35																				#DIV/0!	#DIV/0!	#DIV/0!	#DIV/0!	#DIV/0!	#DIV/0!	#DIV/0!	#DIV/0!	#DIV/0!	#DIV/0!	#DIV/0!	#DIV/0!	#DIV/0!	#DIV/0!	#DIV/0!	#DIV/0!
INDS1	0.69778	0.660091	0.706301	0.676015	0.685665	0.67342	0.706832	0.697817	0.721673	0.6979	0.696006	0.666355	0.658272	0.530346	0.47795	0.555849	0.502426			-0.0540127	0.0700045	-0.0428795	0.0142757	-0.01786	0.0496162	-0.012754	0.0341869	-0.0329413	-0.00271397	-0.0426016	-0.0121312	-0.194335	-0.0987966	0.162985	-0.0961108
INDS2	0.195437	0.161959	0.392116	0.249237	0.465696	0.604084	0.549832	0.539425	0.723277	0.64342	0.680802	0.469315	0.541992	0.43292	0.300255	0.387099	0.317488			-0.171296	1.42108	-0.364379	0.868486	0.297163	-0.0898094	-0.0189268	0.34083	-0.110411	0.0580994	-0.310643	0.154857	-0.201244	-0.306441	0.289232	-0.179827
INDS3	0.449007	0.375529	0.445503	0.385471	0.41244	0.386984	0.456401	0.458403	0.51226	0.421052	0.394325	0.18385	0.179907	0.0670699	0.0632417	0.124953	0.0817781			-0.163646	0.186335	-0.134751	0.0699636	-0.06172	0.179377	0.00438774	0.117487	-0.17805	-0.0634774	-0.53376	-0.0214453	-0.627197	-0.0570778	0.975806	-0.345531
INDS4	0.27053	0.1995	0.252776	0.219502	0.195882	0.0880736	-0.0734875	0.178124	-0.0404469	-0.27366	0.26484	-0.239512	0.0502267	0.0639728	-0.162892	-0.295098	-0.226677			-0.262559	0.267049	-0.131637	-0.107607	-0.550374	-1.83439	-3.42387	-1.22707	5.76592	-1.96777	-1.90436	-1.2097	0.273681	-3.54627	0.811619	-0.231859
INDS5	0.156095	0.0710742	0.193678	0.121427	0.0957772	0.10579	0.0709601	0.0727787	0.220165	-0.0121196	0.128739	-0.101725	-0.000819351	-0.00188072	-0.0257579	-0.0308088	-0.028445			-0.544674	1.72501	-0.373048	-0.211234	0.104546	-0.329238	0.0256282	2.02513	-1.05505	-11.6224	-1.79016	-0.991945	1.29537	12.6958	0.196093	-0.0767246
INDS6	0.0645055	-0.0380236	0.0824272	-0.0380893	-0.0315873	0.0735962	0.193121	0.241055	0.377345	0.364046	0.338239	-0.0434784	-0.0534668	0.0800753	0.0204921	0.063702	0.0303553			-1.58946	-3.16779	-1.4621	-0.170704	-3.32993	1.62406	0.248205	0.565392	-0.0352436	-0.0708887	-1.12854	0.229732	-2.49766	-0.744089	2.10861	-0.52348
INDS7	0.132777	0.0856962	0.150633	0.108454	0.12003	0.125466	0.129036	0.125847	0.229871	0.271897	0.352444	0.14453	0.198893	-0.0234074	-0.0737572	0.0179515	-0.0131196			-0.354586	0.757753	-0.280013	0.106738	0.0452924	0.0284489	-0.0247089	0.826583	0.182828	0.296238	-0.58992	0.376138	-1.11769	2.15103	-1.24339	-1.73083
INDS8	0.712911	0.638606	0.698546	0.638345	0.677893	0.63247	0.591322	0.588208	0.710024	0.558322	0.588828	0.123554	0.279546	0.311767	0.225319	0.257661	0.241816			-0.104227	0.0938596	-0.0861806	0.0619545	-0.0670054	-0.0650602	-0.00526583	0.207097	-0.213658	0.054638	-0.79017	1.26254	0.115261	-0.277284	0.14354	-0.0614959
INDS9	0.475791	0.45838	0.517598	0.464321	0.493012	0.440218	0.377548	0.43164	0.532142	0.525227	0.577265	0.154761	0.396595	0.325611	0.167786	0.255098	0.154164			-0.0365946	0.12919	-0.102931	0.0617924	-0.107084	-0.142363	0.143271	0.23284	-0.0129946	0.0990758	-0.731907	1.56263	-0.178983	-0.484703	0.520374	-0.395665
INDS10	0.426153	0.353539	0.440759	0.356381	0.385299	0.392486	0.35685	0.349819	0.492351	0.370589	0.395575	0.0097592	0.179292	0.028265	-0.15844	-0.00751309	-0.0982337			-0.170394	0.246707	-0.19144	0.0811439	0.018653	-0.0907956	-0.0197029	0.407447	-0.247308	0.0674215	-0.975329	17.3716	-0.842352	-6.60551	-0.952581	12.075
INDS11	0.43719	0.355531	0.431635	0.332099	0.347974	0.357801	0.46264	0.498067	0.604594	0.566388	0.567661	0.373252	0.37026	0.169888	-0.0239451	0.167482	0.0552557			-0.186783	0.21406	-0.230602	0.0477998	0.0282426	0.293009	0.0765757	0.213881	-0.0631941	0.00224862	-0.342474	-0.00801591	-0.541165	-1.14095	-7.99442	-0.67008
INDS12	0.614511	0.565188	0.613499	0.522231	0.614231	0.54532	0.444943	0.424538	0.648923	0.626684	0.666146	0.420378	0.519323	0.41757	0.307596	0.453057	0.388885			-0.0802648	0.0854789	-0.148767	0.176168	-0.112191	-0.184069	-0.0458601	0.528539	-0.0342707	0.0629697	-0.36894	0.235371	-0.195933	-0.263367	0.472896	-0.141641
INDS13	0.382748	0.31182	0.389015	0.34662	0.37201	0.37266	0.342073	0.32262	0.362462	0.22885	0.243877	0.0209776	0.0198905	-0.0178493	-0.101927	-0.0324319	-0.0692435			-0.185312	0.247562	-0.108983	0.0732509	0.00174821	-0.0820787	-0.0568662	0.123496	-0.368625	0.0656623	-0.913983	-0.0518186	-1.89738	4.71041	-0.681812	1.13505
INDS14	0.262593	0.165453	0.292425	0.263604	0.250909	0.282892	0.300179	0.295876	0.35326	0.264087	0.290951	0.330799	0.340146	-0.0534954	-0.160699	-0.0761197	-0.126745			-0.369925	0.767414	-0.0985595	-0.0481581	0.12747	0.0611077	-0.0143371	0.193949	-0.25243	0.101726	0.136957	0.0282547	-1.15727	2.00397	-0.526321	0.665078
INDS15	0.450728	0.328721	0.438603	0.376814	0.400747	0.424636	0.386399	0.353722	0.381438	0.117778	0.0993479	-0.258084	-0.296687	-0.0123756	-0.183843	-0.0756526	-0.142859			-0.27069	0.334273	-0.140878	0.0635152	0.0596099	-0.0900454	-0.0845679	0.0783547	-0.691225	-0.156485	-3.59778	0.149576	-0.958287	13.8553	-0.588494	0.888359
INDS16	0.0178234	-0.0521074	0.115685	-0.0509371	-0.0500056	0.166364	0.250715	0.250619	0.305943	0.262639	0.30096	-0.0301941	-0.0245078	-0.0679803	-0.180636	-0.085877	-0.144175			-3.92353	-3.22013	-1.44031	-0.0182865	-4.3269	0.507027	-0.000381765	0.22075	-0.141544	0.145906	-1.10033	-0.188324	1.77382	1.65717	-0.524584	0.678849
INDS17	0.279219	0.168568	0.270233	0.178217	0.20711	0.177348	0.311965	0.295087	0.430519	0.419942	0.409642	0.23735	0.26211	0.254004	-0.00447704	0.162861	0.160844			-0.396289	0.603113	-0.340507	0.162123	-0.143699	0.759052	-0.0541039	0.458959	-0.0245688	-0.0245275	-0.420591	0.104316	-0.0309245	-1.01763	-37.3769	-0.0123864
INDS18	0.0416778	-0.0702877	0.0660111	-0.0670875	-0.0379555	0.000740086	0.196166	0.25506	0.337078	0.203905	0.181427	-0.0335255	-0.0529056	0.00122963	-0.215881	-0.00301934	-0.117089			-2.68645	-1.93916	-2.01631	-0.434238	-1.0195	264.058	0.300226	0.321565	-0.395081	-0.110237	-1.18479	0.578071	-1.02324	-176.565	-0.986014	37.7795
INDS19	0.103932	0.0250796	0.0773064	0.0714483	0.0987373	0.0926513	0.160522	0.161009	0.200013	0.170347	0.200395	0.0439443	0.0324138	-0.0385967	-0.0687852	-0.054784	-0.0687599			-0.758691	2.08244	-0.0757773	0.381941	-0.061639	0.732535	0.0030358	0.242248	-0.14832	0.176393	-0.780711	-0.262389	-2.19075	0.782151	-0.203549	0.255109
INDS20	0.540275	0.487636	0.559181	0.486058	0.528168	0.523558	0.491901	0.487841	0.643964	0.623884	0.672188	0.417472	0.445221	0.126429	-0.0727739	0.0428519	-0.0872998			-0.0974312	0.14672	-0.130769	0.0866367	-0.00872909	-0.0604644	-0.00825304	0.320027	-0.0311811	0.0774247	-0.378936	0.0664697	-0.716031	-1.57561	-1.58884	-3.03725
INDS21	0.653454	0.61422	0.670884	0.607808	0.645876	0.637613	0.604248	0.604142	0.737289	0.72849	0.770107	0.513848	0.57471	0.268024	0.112992	0.257104	0.0789832			-0.060041	0.0922541	-0.0940204	0.0626318	-0.0127936	-0.0523267	-0.000176337	0.220391	-0.0119341	0.0571265	-0.332758	0.118445	-0.533636	-0.578428	1.27543	-0.692797
INDS22	0.469023	0.385679	0.477358	0.397288	0.416999	0.428811	0.509259	0.512957	0.558592	0.418431	0.371411	-0.134103	-0.0927378	0.023713	-0.0388284	0.136967	0.0744982			-0.177697	0.237707	-0.167735	0.0496125	0.0283277	0.187607	0.00726074	0.0889657	-0.250918	-0.112372	-1.36106	-0.308457	-1.2557	-2.63743	-4.52749	-0.456086
INDS23	0.665701	0.581752	0.648724	0.573493	0.605281	0.590631	0.553807	0.550479	0.697418	0.719696	0.734326	0.47716	0.486502	0.0918949	-0.0956293	0.0259459	-0.0769254			-0.126105	0.11512	-0.115967	0.055429	-0.0242034	-0.0623476	-0.00600844	0.266929	0.0319425	0.0203288	-0.350207	0.0195786	-0.811111	-2.04064	-1.27132	-3.96484
INDS24	-0.189958	-0.179075	-0.186244	-0.163355	-0.171021	-0.168832	-0.204651	-0.149659	-0.139152	-0.140258	-0.145052	-0.145719	-0.117775	-0.0772103	-0.094436	-0.125117	-0.0492786			-0.0572919	0.0400382	-0.122901	0.04693	-0.0127977	0.212154	-0.268709	-0.0702069	0.00794311	0.0341803	0.00459886	-0.191767	-0.344423	0.223101	0.324886	-0.60614
INDS25	-0.184539	-0.168549	-0.129035	-0.144297	-0.145654	-0.135346	-0.129474	-0.134618	-0.138735	-0.13153	-0.111196	-0.198933	-0.149968	-0.0800263	-0.0568553	-0.0185308	-0.0392064			-0.0866473	-0.23444	0.118281	0.00940101	-0.0707699	-0.0433827	0.0397316	0.0305805	-0.0519339	-0.154596	0.789028	-0.246136	-0.466379	-0.289542	-0.67407	1.11574
INDS26	-0.162195	-0.108631	-0.0437325	-0.0963752	-0.0875493	-0.0415625	0.0556219	0.0581969	0.1907	0.19005	0.242677	0.229364	0.261124	0.0162991	-0.0332517	0.00641012	-0.0528849			-0.330242	-0.597423	1.20374	-0.0915787	-0.525267	-2.33827	0.046294	2.2768	-0.00340824	0.276912	-0.0548574	0.138469	-0.937581	-3.0401	-1.19278	-9.25023
INDS27	0.31607	0.236571	0.32439	0.204357	0.20782	0.206319	0.255643	0.256002	0.392306	0.378237	0.392228	0.324963	0.346876	-0.0581399	-0.212483	-0.0811272	-0.143468			-0.251523	0.371214	-0.370026	0.016947	-0.00722303	0.239065	0.00140253	0.532435	-0.0358615	0.0369889	-0.171494	0.0674321	-1.16761	2.65468	-0.618194	0.768436
INDS28	0.466577	0.386636	0.464743	0.397508	0.430298	0.421947	0.491228	0.490206	0.609745	0.624921	0.660922	0.415142	0.427016	0.170542	-0.030531	0.18754	0.142077			-0.171334	0.202017	-0.144671	0.0824881	-0.0194073	0.164193	-0.00207941	0.243855	0.0248892	0.0576079	-0.371874	0.0286014	-0.600618	-1.17902	-7.14261	-0.242419
INDS29	-0.222355	-0.241599	-0.222279	-0.227244	-0.234177	-0.23161	-0.220921	-0.209837	-0.199696	-0.226903	-0.219894	-0.238805	-0.242566	-0.155052	-0.181775	-0.12858	-0.16758			0.0865468	-0.0799657	0.0223368	0.0305079	-0.0109609	-0.0461519	-0.050173	-0.048328	0.136246	-0.0308905	0.0860007	0.0157494	-0.360784	0.172346	-0.292642	0.303314
INDS30	-0.509783	-0.562911	-0.516707	-0.56871	-0.49792	-0.502262	-0.483107	-0.432907	-0.391954	-0.447971	-0.401107	-0.443214	-0.413708	-0.201844	-0.377459	-0.166862	-0.279625			0.104216	-0.08208	0.100642	-0.124474	0.00872008	-0.0381372	-0.103911	-0.0946004	0.142918	-0.104614	0.104978	-0.0665737	-0.512111	0.870054	-0.557933	0.675789
INDS31	-0.0571441	-0.0571805	-0.0573271	-0.02909		-0.0571449	-0.0572047	-0.0572869	-0.057279	-0.0573216	-0.0572965	-0.0571336	-0.0570288	-0.0284672	-0.028297	-0.0277483	-0.0281367			0.000637511	0.00256402	-0.492562	-1	#DIV/0!	0.00104682	0.00143705	-0.000138247	0.000744453	-0.000438321	-0.00284355	-0.00183436	-0.500827	-0.00597901	-0.0193915	0.0139983
INDS32	-0.206644	-0.251614	-0.258396	-0.266524	-0.277072	-0.26826	-0.229492	-0.211473	-0.203255	-0.232907	-0.223428	-0.236888	-0.244162	0.0198258	-0.143646	0.0124834	0.0100776			0.217617	0.0269541	0.0314557	0.0395793	-0.0318044	-0.144519	-0.078516	-0.0388602	0.145884	-0.0406983	0.0602452	0.0307044	-1.0812	-8.24544	-1.0869	-0.192718
INDS33	-0.254147	-0.260966	-0.239884	-0.248643	-0.239847	-0.227884	-0.200656	-0.189099	-0.176612	-0.205407	-0.198209	-0.209743	-0.222078	0.0389759	-0.0188988	0.00833282	-0.0200924			0.0268304	-0.0807855	0.036515	-0.0353782	-0.0498763	-0.119483	-0.057596	-0.0660356	0.163046	-0.0350469	0.0581959	0.0588065	-1.17551	-1.48488	-1.44092	-3.41124
INDS34	0.24777	0.166049	0.227812	0.153853	0.177771	0.115851	-0.00419945	0.173434	0.0444149	0.10375	0.404082	0.0343431	0.169478	0.115883	0.0554158	0.15568	0.0782524			-0.329825	0.371951	-0.32465	0.15546	-0.348314	-1.03625	-42.2993	-0.74391	1.33593	2.89477	-0.91501	3.93486	-0.316239	-0.521794	1.80931	-0.497352
INDS35																				#DIV/0!	#DIV/0!	#DIV/0!	#DIV/0!	#DIV/0!	#DIV/0!	#DIV/0!	#DIV/0!	#DIV/0!	#DIV/0!	#DIV/0!	#DIV/0!	#DIV/0!	#DIV/0!	#DIV/0!	#DIV/0!
IRES1	-0.0413789	0.0883569	-0.560113	-0.589987	-0.633607	-0.650968	-0.65592	-0.630131	-0.653738	-0.635045	-0.626034	-0.727192	-0.658333	-0.617802	-0.575599	-0.632668	-0.491782			-3.13532	-7.33921	0.0533346	0.0739338	0.0274011	0.00760634	-0.0393177	0.0374649	-0.0285945	-0.01419	0.161585	-0.0946906	-0.0615669	-0.068312	0.0991476	-0.222685
IRES2	-0.231449	-0.1482	-0.23217	-0.258641	-0.0783611	-0.148031	-0.249956	-0.217983	-0.216764	-0.113502	-0.11487	-0.204443	-0.211506	-0.247151	-0.172167	-0.232236	-0.151365			-0.359688	0.5666	0.114017	-0.697028	0.889091	0.688538	-0.127916	-0.00559342	-0.476378	0.0120522	0.779775	0.0345486	0.168531	-0.303395	0.348901	-0.348227
IRES3	-0.203734	0.00209115	-0.306708	-0.325384	-0.515243	-0.541458	-0.608291	-0.609066	-0.629003	-0.638676	-0.496609	-0.393693	-0.418806	-0.504773	-0.664998	-0.624787	-0.501727			-1.01026	-147.669	0.0608938	0.58349	0.0508797	0.123431	0.00127461	0.032734	0.0153775	-0.22244	-0.207237	0.0637859	0.205268	0.317421	-0.0604682	-0.196963
IRES4	-0.136413	-0.120213	-0.102476	-0.111734	-0.108354	-0.16123	-0.14003	-0.106765	-0.103056	-0.118537	-0.108659	-0.0884761	-0.0890472	-0.0865572	-0.0959895	-0.0890197	-0.0840007			-0.118756	-0.147546	0.0903403	-0.0302525	0.487996	-0.131491	-0.237559	-0.0347329	0.150214	-0.0833301	-0.185746	0.00645518	-0.0279634	0.108972	-0.0726096	-0.0563809
IRES5	-0.0652795	-0.0603461	-0.0681449	-0.0480319	-0.0442564	-0.0440231	-0.0493954	-0.0433105	-0.0436259	-0.0491268	-0.0526761	-0.0477924	-0.0618205	-0.0572108	-0.0428658	-0.0433661	-0.0400829			-0.0755728	0.129234	-0.29515	-0.0786044	-0.00527288	0.122036	-0.123189	0.00728315	0.126093	0.0722476	-0.0927111	0.29352	-0.0745659	-0.250739	0.0116718	-0.0757093
IRES6	-0.228846	-0.190735	-0.247108	-0.271729	-0.331336	-0.317917	-0.272147	-0.387692	-0.437432	-0.401881	-0.445522	-0.392627	-0.424381	-0.331835	-0.474933	-0.463464	-0.431595			-0.166538	0.295557	0.0996393	0.219361	-0.0404999	-0.143969	0.424568	0.128298	-0.0812711	0.108591	-0.118726	0.0808758	-0.218074	0.431233	-0.0241479	-0.0687626
IRES7	-0.617599	-0.48961	-0.449944	-0.435397	-0.483627	-0.539199	-0.508402	-0.545322	-0.622965	-0.575343	-0.620467	-0.781965	-0.68152	-0.732858	-0.650102	-0.69828	-0.60075			-0.207236	-0.0810147	-0.0323308	0.110772	0.114907	-0.0571158	0.0726197	0.14238	-0.0764445	0.0784293	0.260285	-0.128452	0.0753293	-0.112923	0.074108	-0.139671
IRES8	-0.0518279	-0.0635966	-0.0505724	-0.0586482	-0.0856667	-0.127929	-0.128722	-0.10926	-0.148008	-0.137644	-0.162371	-0.84451	-0.460671	-0.715911	-0.602226	-0.598039	-0.539866			0.227072	-0.204793	0.159688	0.460687	0.493335	0.00619478	-0.151189	0.354639	-0.0700266	0.179646	4.20112	-0.454511	0.554062	-0.158799	-0.00695245	-0.0972732
IRES9	-0.788847	-0.756293	-0.769123	-0.799469	-0.81381	-0.790126	-0.778402	-0.75633	-0.817547	-0.818082	-0.771275	-0.90185	-0.860365	-0.865153	-0.868771	-0.826351	-0.83571			-0.0412677	0.0169649	0.0394546	0.0179387	-0.029103	-0.0148382	-0.0283551	0.0809387	0.000655083	-0.0572155	0.169297	-0.0459992	0.00556445	0.00418194	-0.0488272	0.0113261
IRES10	-0.245458	-0.202471	-0.246072	-0.270821	-0.265095	-0.207425	-0.274316	-0.248581	-0.382383	-0.342433	-0.370512	-0.28321	-0.238704	-0.327757	-0.23045	-0.212473	-0.284973			-0.175133	0.215349	0.100575	-0.0211419	-0.217546	0.32248	-0.0938134	0.538263	-0.104475	0.0819966	-0.235624	-0.157149	0.373066	-0.296885	-0.0780083	0.34122
IRES11	-0.109384	-0.0992479	-0.188513	-0.222643	-0.0622495	-0.119486	-0.216297	-0.234012	-0.36887	-0.301629	-0.35427	-0.596394	-0.564885	-0.47329	-0.556801	-0.543577	-0.474658			-0.0926631	0.899415	0.181047	-0.720406	0.919467	0.810228	0.0819011	0.576289	-0.182288	0.174523	0.683444	-0.0528335	-0.162149	0.176448	-0.0237484	-0.126789
IRES12	-0.226265	-0.151447	-0.224268	-0.266868	-0.290269	-0.261555	-0.260181	-0.243114	-0.300935	-0.313473	-0.302389	-0.54371	-0.297045	-0.307563	-0.347798	-0.250226	-0.290307			-0.330666	0.480841	0.18995	0.0876858	-0.098923	-0.00525053	-0.0655971	0.237834	0.041665	-0.0353608	0.798051	-0.453671	0.0354087	0.130821	-0.280542	0.160176
IRES13	-0.444638	-0.354661	-0.389694	-0.3182	-0.313996	-0.314284	-0.356949	-0.246789	-0.435405	-0.387045	-0.343888	-0.400013	-0.299995	-0.154635	-0.209183	-0.225716	-0.170591			-0.202362	0.0987803	-0.183463	-0.0132102	0.000916073	0.135753	-0.308614	0.764279	-0.111069	-0.111506	0.163208	-0.250037	-0.484541	0.352753	0.0790349	-0.244219
IRES14	-0.703076	-0.618629	-0.635546	-0.552319	-0.635254	-0.644426	-0.55855	-0.487606	-0.6519	-0.639091	-0.620386	-0.795238	-0.807454	-0.550147	-0.610657	-0.663023	-0.555527			-0.12011	0.0273458	-0.130954	0.150158	0.0144373	-0.13326	-0.127014	0.33694	-0.0196486	-0.0292695	0.281844	0.015362	-0.318665	0.109988	0.0857537	-0.162129
IRES15	-0.286008	-0.231717	-0.221953	-0.322013	-0.277223	-0.370632	-0.354916	-0.342853	-0.310169	-0.307207	-0.313917	-0.105697	-0.199585	-0.229918	-0.220679	-0.119825	-0.206007			-0.189826	-0.0421351	0.450816	-0.139096	0.336947	-0.0424027	-0.0339897	-0.0953291	-0.00955022	0.0218418	-0.663296	0.888271	0.151981	-0.0401831	-0.457016	0.71923
IRES16	-0.243933	-0.194509	-0.278489	-0.331216	-0.386536	-0.401728	-0.410524	-0.411376	-0.544225	-0.515076	-0.468773	-0.501583	-0.459381	-0.354563	-0.397589	-0.357859	-0.535771			-0.202613	0.431756	0.189332	0.16702	0.0393049	0.0218935	0.00207626	0.322939	-0.053562	-0.0898941	0.0699905	-0.0841371	-0.228174	0.121351	-0.099927	0.497156
IRES17	-0.381348	-0.321841	-0.368172	-0.328453	-0.310431	-0.333031	-0.411027	-0.425918	-0.479695	-0.489933	-0.337926	-0.503926	-0.427157	-0.461323	-0.412732	-0.363044	-0.261812			-0.156043	0.143954	-0.10788	-0.0548707	0.0728016	0.2342	0.0362295	0.126262	0.0213414	-0.31026	0.491231	-0.152342	0.079984	-0.10533	-0.120388	-0.278844
IRES18	-0.15768	-0.171666	-0.291433	-0.375527	-0.220356	-0.290267	-0.366398	-0.337782	-0.337469	-0.280286	-0.262117	-0.335435	-0.174648	-0.190392	-0.226368	-0.26849	-0.225756			0.0886927	0.697681	0.288551	-0.41321	0.317269	0.262277	-0.0780991	-0.000927256	-0.169448	-0.0648223	0.279714	-0.479338	0.0901474	0.188955	0.186078	-0.159163
IRES19	-0.245365	-0.202621	-0.372604	-0.507076	-0.469456	-0.510658	-0.536191	-0.534818	-0.543672	-0.513916	-0.505897	-0.571183	-0.212971	-0.229991	-0.31622	-0.26597	-0.271962			-0.174203	0.838915	0.360899	-0.0741911	0.0877654	0.0500001	-0.00255996	0.0165545	-0.0547317	-0.0156027	0.129049	-0.62714	0.0799162	0.374924	-0.15891	0.0225296
IRES20	-0.419854	-0.345277	-0.349367	-0.507861	-0.55381	-0.62513	-0.649154	-0.623283	-0.654309	-0.656543	-0.594531	-0.700904	-0.489934	-0.50903	-0.511664	-0.421543	-0.402066			-0.177627	0.0118463	0.453661	0.0904749	0.128781	0.0384308	-0.0398535	0.0497779	0.00341407	-0.0944516	0.178918	-0.300996	0.0389767	0.00517424	-0.176133	-0.0462044
IRES21	-0.337236	-0.360262	-0.469543	-0.21721	-0.253601	-0.289863	-0.333345	-0.277353	-0.315605	-0.306214	-0.344832	-0.412927	-0.121825	-0.113061	-0.0606319	-0.107721	-0.129409			0.0682806	0.303336	-0.537402	0.167543	0.142987	0.150008	-0.16797	0.137918	-0.029754	0.126112	0.197474	-0.704971	-0.0719436	-0.463723	0.776642	0.201329
IRES22	-0.386753	-0.254398	-0.386191	-0.39003	-0.325544	-0.346527	-0.356316	-0.381492	-0.445741	-0.443037	-0.433084	-0.390744	-0.383148	-0.367059	-0.261658	-0.319712	-0.320615			-0.34222	0.518058	0.00994125	-0.165336	0.0644547	0.0282481	0.0706558	0.168416	-0.00606615	-0.0224657	-0.0977622	-0.0194411	-0.0419927	-0.28715	0.221872	0.00282319
IRES23	-0.253059	-0.235288	-0.324582	-0.469172	-0.417462	-0.451579	-0.461228	-0.440224	-0.409646	-0.388867	-0.358906	-0.435901	-0.206001	-0.292497	-0.330542	-0.299295	-0.248505			-0.0702273	0.37951	0.445466	-0.110216	0.0817251	0.0213678	-0.0455389	-0.0694605	-0.0507234	-0.0770483	0.214527	-0.527412	0.419878	0.130071	-0.0945326	-0.1697
IRES24	-0.174087	-0.168392	-0.207593	-0.15896	-0.183874	-0.189827	-0.204327	-0.191422	-0.267008	-0.315235	-0.280698	-0.307538	-0.240007	-0.196733	-0.198882	-0.202205	-0.140651			-0.0327117	0.232791	-0.234267	0.156731	0.032374	0.0763818	-0.0631555	0.394866	0.180617	-0.109558	0.0956191	-0.219585	-0.180303	0.010919	0.0167114	-0.304416
IRES25	-0.387012	-0.323961	-0.384353	-0.391255	-0.45415	-0.484573	-0.528872	-0.525316	-0.575316	-0.624192	-0.633296	-0.382294	-0.339332	-0.31763	-0.29247	-0.395662	-0.500442			-0.162918	0.186416	0.0179572	0.160754	0.0669889	0.0914182	-0.00672438	0.0951822	0.0849553	0.0145847	-0.396343	-0.112379	-0.0639541	-0.0792115	0.352829	0.264822
IRES26	-0.332425	-0.287341	-0.271359	-0.352317	-0.391743	-0.44611	-0.470997	-0.434657	-0.458354	-0.459162	-0.455833	-0.534953	-0.206904	-0.278604	-0.301442	-0.0135707	-0.0949546			-0.135622	-0.0556185	0.298341	0.111906	0.138783	0.0557853	-0.0771549	0.0545193	0.00176252	-0.00725021	0.173573	-0.61323	0.346539	0.0819707	-0.954981	5.99701
IRES27	-0.430392	-0.324565	-0.385308	-0.49808	-0.469687	-0.504471	-0.499641	-0.461162	-0.476771	-0.505213	-0.57598	-0.543516	-0.478044	-0.41608	-0.352202	-0.296609	-0.299681			-0.245885	0.187151	0.292679	-0.0570042	0.0740572	-0.00957315	-0.0770149	0.0338474	0.0596554	0.140075	-0.056363	-0.12046	-0.12962	-0.153523	-0.157845	0.0103557
IRES28	-0.780677	-0.752418	-0.736769	-0.735374	-0.748666	-0.776146	-0.768237	-0.753105	-0.787432	-0.769192	-0.766548	-0.739211	-0.746146	-0.757857	-0.740527	-0.685762	-0.655728			-0.0361982	-0.0207985	-0.00189216	0.0180745	0.0367052	-0.0101894	-0.0196981	0.0455814	-0.0231645	-0.00343671	-0.0356626	0.00938168	0.0156953	-0.0228678	-0.0739538	-0.0437965
IRES29	-0.306088	-0.257805	-0.336741	-0.466017	-0.465645	-0.513982	-0.538329	-0.537626	-0.527603	-0.537179	-0.496828	-0.655443	-0.45899	-0.358439	-0.397398	-0.40272	-0.377421			-0.157742	0.306185	0.383905	-0.000799334	0.103806	0.0473693	-0.00130559	-0.018642	0.0181492	-0.0751159	0.319255	-0.299725	-0.219072	0.108692	0.0133927	-0.0628219
IRES30	-0.454868	-0.303118	-0.454009	-0.621638	-0.735845	-0.799639	-0.807633	-0.797673	-0.863684	-0.856108	-0.835602	-0.891287	-0.913522	-0.828086	-0.85815	-0.828594	-0.827918			-0.333613	0.497794	0.36922	0.183719	0.0866959	0.00999703	-0.0123328	0.0827542	-0.00877177	-0.0239524	0.0666412	0.0249468	-0.0935234	0.0363046	-0.0344407	-0.000816647
IRES31	-0.235468	-0.224024	-0.304676	-0.352276	-0.35624	-0.389502	-0.399128	-0.405519	-0.374176	-0.379822	-0.380615	-0.398988	-0.29502	-0.357912	-0.33073	-0.303822	-0.306293			-0.0485996	0.360016	0.156231	0.0112528	0.09337	0.0247132	0.016013	-0.0772917	0.015089	0.0020886	0.0482697	-0.260579	0.213182	-0.0759456	-0.08136	0.00813333
IRES32	-0.290299	-0.360682	-0.359267	-0.481846	-0.384075	-0.430039	-0.46163	-0.444375	-0.392987	-0.384672	-0.394485	-0.480592	-0.184022	-0.267204	-0.219286	-0.214867	-0.212838			0.242449	-0.00392429	0.341192	-0.202909	0.119676	0.0734612	-0.0373803	-0.11564	-0.0211584	0.025509	0.218278	-0.617094	0.452026	-0.179333	-0.0201497	-0.0094445
IRES33	-0.133086	-0.124953	-0.403615	-0.499472	-0.558892	-0.543882	-0.54603	-0.539313	-0.646302	-0.592355	-0.61193	-0.700845	-0.654228	-0.717502	-0.622765	-0.606276	-0.643817			-0.0611112	2.23014	0.237497	0.118964	-0.0268573	0.00395037	-0.0123024	0.198382	-0.0834702	0.0330459	0.145302	-0.0665154	0.0967161	-0.132038	-0.0264765	0.0619205
IRES34	-0.354232	-0.310657	-0.383132	-0.470005	-0.463036	-0.501968	-0.521155	-0.506451	-0.520006	-0.507687	-0.450099	-0.631323	-0.350721	-0.348372	-0.435124	-0.401695	-0.365904			-0.123011	0.233294	0.226746	-0.0148286	0.0840798	0.0382236	-0.0282143	0.0267657	-0.0236913	-0.113432	0.402631	-0.444466	-0.00669746	0.249019	-0.0768266	-0.0890988
IRES35		-0.0285714	-0.0285714		-0.0289588	-0.0285714	-0.0324165	-0.0290929	-0.0314933	-0.0318103	-0.0301505	-0.0367533	-0.0323664	-0.0332074	-0.0337227	-0.0287269	-0.0286656			#DIV/0!	2.18637e-08	-1	#DIV/0!	-0.0133774	0.134578	-0.102529	0.0825096	0.0100644	-0.0521782	0.218994	-0.119359	0.0259824	0.0155173	-0.148142	-0.00213615
ITAS1	0.620097	0.626784	0.707743	0.67157	0.646546	0.65336	0.658705	0.646357	0.623365	0.618818	0.580796	0.63996	0.620418	0.63665	0.548966	0.552124	0.584925			0.010784	0.129166	-0.0511106	-0.0372612	0.0105383	0.00818063	-0.0187457	-0.0355714	-0.00729491	-0.0614424	0.101867	-0.0305363	0.0261627	-0.137727	0.00575349	0.0594077
ITAS2	0.47346	0.478416	0.232072	0.458533	0.458103	0.458352	0.131645	0.248977	0.173951	0.162526	0.0908331	0.136539	0.108606	0.073787	0.0992597	0.163514	0.130469			0.0104667	-0.514915	0.975819	-0.000937699	0.000544025	-0.712786	0.891276	-0.301336	-0.0656833	-0.441116	0.503183	-0.204574	-0.320602	0.345219	0.647336	-0.202091
ITAS3	0.567519	0.571808	0.668865	0.627991	0.591959	0.586282	0.585656	0.576248	0.544848	0.547943	0.481007	0.580188	0.561021	0.553004	0.466448	0.503673	0.536703			0.00755736	0.169737	-0.0611089	-0.0573774	-0.00958942	-0.00106798	-0.0160635	-0.0544908	0.00567942	-0.122158	0.206195	-0.0330353	-0.0142902	-0.15652	0.0798056	0.0655786
ITAS4	-0.288997	-0.238229	-0.288765	0.077765	-0.217847	-0.259273	-0.315781	0.0956946	-0.409385	-0.352163	-0.401985	0.160621	-0.296161	-0.0889396	-0.444308	-0.392051	-0.331392			-0.175671	0.212131	-1.2693	-3.80135	0.190161	0.217946	-1.30304	-5.27804	-0.139777	0.141477	-1.39957	-2.84385	-0.699692	3.99562	-0.117613	-0.154722
ITAS5	0.0736755	0.108698	0.128419	0.0649458	0.0617363	0.178713	0.158848	0.169635	0.0822422	0.130217	0.0428226	0.134487	0.0472812	0.157627	-0.216806	-0.181801	-0.161794			0.475357	0.181431	-0.494266	-0.0494174	1.89479	-0.111157	0.0679063	-0.515181	0.583339	-0.671145	2.14056	-0.648432	2.33382	-2.37544	-0.161458	-0.110047
ITAS6	0.489732	0.478867	0.531467	0.440046	0.398566	0.369859	0.350192	0.339978	0.297606	0.300047	0.260753	0.315257	0.284011	0.322614	0.259482	0.266092	0.293418			-0.0221855	0.109844	-0.172017	-0.0942623	-0.0720262	-0.0531742	-0.0291658	-0.124631	0.0082021	-0.130961	0.209027	-0.0991118	0.135918	-0.195687	0.0254735	0.102694
ITAS7	0.639831	0.633011	0.711884	0.65685	0.604776	0.582422	0.570652	0.558819	0.522272	0.524364	0.451627	0.558484	0.537099	0.570379	0.469823	0.465963	0.499229			-0.0106596	0.1246	-0.0773083	-0.0792782	-0.0369614	-0.0202101	-0.0207355	-0.0654008	0.00400561	-0.138713	0.236603	-0.0382902	0.0619616	-0.176298	-0.00821585	0.0713935
ITAS8	0.507189	0.528129	0.523179	0.550536	0.542202	0.544235	0.520766	0.516006	0.426904	0.419091	0.284013	0.383588	0.329104	0.253965	0.313934	0.389592	0.385485			0.0412862	-0.00937288	0.052289	-0.0151369	0.00374927	-0.0431234	-0.00913998	-0.172676	-0.0183016	-0.322312	0.350601	-0.142038	-0.228315	0.236132	0.241002	-0.0105432
ITAS9	0.341481	0.334113	0.308772	0.232671	0.200521	0.136268	-0.0208794	-0.06178	-0.171103	-0.158633	-0.378497	-0.329918	-0.459366	-0.463854	-0.341345	-0.384936	-0.388524			-0.0215754	-0.075847	-0.246463	-0.138177	-0.320431	-1.15322	1.9589	1.76956	-0.0728835	1.38599	-0.128347	0.392365	0.0097689	-0.26411	0.127704	0.00932079
ITAS10	0.376909	0.417988	0.398892	0.430523	0.38751	0.31899	0.265057	0.244143	0.167121	0.163177	0.0214455	0.211281	0.249302	0.231265	0.164733	0.279229	0.280218			0.108988	-0.045685	0.0792971	-0.0999077	-0.176821	-0.169076	-0.0789037	-0.315479	-0.0235985	-0.868576	8.85201	0.179956	-0.0723519	-0.287688	0.695045	0.00354236
ITAS11	0.619993	0.617754	0.638165	0.528312	0.534837	0.463828	0.367843	0.324059	0.297007	0.22944	0.2387	0.421128	0.400733	0.437073	0.36172	0.351831	0.395946			-0.00361112	0.0330415	-0.172139	0.0123506	-0.132768	-0.20694	-0.119031	-0.0834779	-0.227493	0.0403596	0.764257	-0.0484313	0.0906862	-0.172405	-0.0273377	0.125386
ITAS12	0.539188	0.533019	0.586949	0.461968	0.3668	0.303905	0.287806	0.296006	0.233639	0.196852	0.0708724	0.282141	0.17558	0.227997	0.11573	-0.00919939	0.167234			-0.0114408	0.101178	-0.212933	-0.206005	-0.171469	-0.0529754	0.0284912	-0.210695	-0.157452	-0.639971	2.98097	-0.377689	0.298538	-0.492404	-1.07949	-19.1788
ITAS13	0.425103	0.408803	0.370887	0.431035	0.378989	0.289307	0.212565	0.160347	0.0900113	0.111706	-0.157594	0.173354	-0.0515665	0.329623	0.174895	0.0489515	0.215305			-0.0383428	-0.0927482	0.162174	-0.120748	-0.236634	-0.265262	-0.245658	-0.438646	0.241024	-2.41079	-2.1	-1.29746	-7.39219	-0.469411	-0.720108	3.39833
ITAS14	0.437547	0.411103	0.455516	0.438981	0.450785	0.379848	0.325871	0.295829	0.240534	0.233167	0.0923985	0.230647	0.199499	0.191104	-0.461899	-0.601486	0.149896			-0.0604374	0.108034	-0.0362986	0.0268907	-0.157364	-0.142102	-0.0921891	-0.186915	-0.0306283	-0.603724	1.49622	-0.135043	-0.0420802	-3.41699	0.302204	-1.24921
ITAS15	-0.0285638	0.0167978	0.185706	0.044497	-0.139451	-0.238162	-0.34503	-0.408012	-0.429488	-0.418329	-0.644273	-0.515695	-0.34211	-0.305929	-0.501585	-0.524439	-0.190711			-1.58808	10.0554	-0.76039	-4.13393	0.707859	0.448719	0.182542	0.0526346	-0.0259822	0.540111	-0.19957	-0.336605	-0.105758	0.639548	0.0455627	-0.636351
ITAS16	0.318065	0.313833	0.405513	0.357442	0.311138	0.282775	0.277741	0.267343	0.227785	0.230293	0.187628	0.224466	0.21916	0.310241	0.153157	0.192586	0.235039			-0.013305	0.29213	-0.118544	-0.129541	-0.0911607	-0.0178008	-0.0374388	-0.147967	0.0110105	-0.185265	0.19634	-0.0236419	0.415593	-0.50633	0.257443	0.220436
ITAS17	0.452299	0.484424	0.556989	0.418733	0.340641	0.350748	0.364524	0.33589	0.295609	0.28865	0.224101	0.340043	0.285318	0.356453	0.214502	0.296022	0.256355			0.0710249	0.149798	-0.24822	-0.186497	0.0296721	0.039275	-0.0785525	-0.119921	-0.0235427	-0.223624	0.517364	-0.160935	0.249318	-0.398231	0.380041	-0.134001
ITAS18	0.577614	0.580524	0.65748	0.578833	0.538524	0.5265	0.510221	0.492619	0.446296	0.437652	0.347583	0.455364	0.44142	0.496636	0.394073	0.382153	0.422312			0.00503788	0.132563	-0.119619	-0.0696371	-0.022328	-0.030919	-0.0344996	-0.0940334	-0.0193682	-0.2058	0.310086	-0.0306229	0.125088	-0.206516	-0.0302482	0.105087
ITAS19	0.328042	0.330644	0.303719	0.187762	0.112771	0.160925	0.0447547	0.0243802	-0.0612795	-0.063558	-0.193922	-0.0154558	0.0816677	0.0795746	0.0523917	0.207744	0.241349			0.0079341	-0.0814323	-0.381789	-0.399397	0.427015	-0.721892	-0.455249	-3.5135	0.0371819	2.05111	-0.920299	-6.28395	-0.0256304	-0.341603	2.9652	0.161765
ITAS20	0.692536	0.693166	0.75893	0.688247	0.645257	0.633955	0.628688	0.623813	0.60653	0.59988	0.550145	0.633322	0.601158	0.658438	0.547914	0.53166	0.575749			0.000909386	0.0948748	-0.0931352	-0.0624628	-0.0175151	-0.00830866	-0.00775446	-0.0277049	-0.0109651	-0.0829073	0.151191	-0.0507864	0.0952833	-0.167858	-0.0296657	0.0829275
ITAS21	0.542957	0.539744	0.570544	0.467575	0.416087	0.414514	0.414735	0.406253	0.368971	0.369577	0.309639	0.404841	0.390955	0.401839	0.288448	0.261546	0.311096			-0.00591788	0.0570638	-0.180476	-0.110116	-0.00378104	0.000532504	-0.0204517	-0.0917693	0.00164368	-0.16218	0.307461	-0.0343013	0.0278396	-0.28218	-0.0932657	0.189454
ITAS22	0.554154	0.55164	0.640437	0.567991	0.515253	0.487574	0.478908	0.468385	0.43137	0.433398	0.354923	0.489749	0.471727	0.453147	0.364515	0.377646	0.412774			-0.00453624	0.160969	-0.113121	-0.0928494	-0.0537189	-0.0177748	-0.0219714	-0.0790278	0.00470048	-0.181068	0.379874	-0.0367995	-0.0393861	-0.195593	0.0360223	0.0930202
ITAS23	0.583274	0.58581	0.68554	0.628753	0.590771	0.567543	0.571378	0.567781	0.547747	0.541486	0.518701	0.57038	0.530996	0.578982	0.470235	0.483528	0.522308			0.00434776	0.170243	-0.0828364	-0.0604076	-0.0393186	0.00675807	-0.0062953	-0.0352861	-0.0114295	-0.0420786	0.0996307	-0.0690476	0.0903696	-0.187825	0.0282686	0.0802015
ITAS24	0.121456	0.175493	0.214391	0.189915	0.173566	0.137504	0.15157	0.148833	0.118963	0.110687	0.109343	0.141392	0.115512	0.105311	0.0503902	0.0541829	0.0768973			0.444906	0.221655	-0.114165	-0.0860852	-0.207771	0.102296	-0.0180615	-0.200696	-0.0695654	-0.0121448	0.293111	-0.183036	-0.0883165	-0.52151	0.0752669	0.419217
ITAS25	0.225343	0.205769	0.202343	0.234399	0.217857	0.192299	0.23806	0.234101	0.190848	0.174012	0.149245	0.202682	0.178224	0.124791	0.0592199	0.0635542	0.0862961			-0.0868622	-0.0166514	0.158424	-0.0705694	-0.117317	0.237965	-0.016628	-0.184762	-0.0882147	-0.14233	0.358045	-0.120672	-0.29981	-0.525446	0.0731902	0.357836
ITAS26	0.604799	0.604962	0.682769	0.616056	0.574728	0.572459	0.57666	0.573881	0.550036	0.546529	0.496108	0.594797	0.555795	0.592879	0.497379	0.509591	0.550595			0.000269118	0.128615	-0.0977086	-0.0670863	-0.00394691	0.00733819	-0.00481888	-0.0415512	-0.0063756	-0.0922565	0.198926	-0.0655707	0.0667215	-0.161079	0.024554	0.0804632
ITAS27	0.658675	0.651573	0.720915	0.632059	0.576114	0.533999	0.51495	0.491528	0.455309	0.452412	0.376225	0.470084	0.449	0.499864	0.387724	0.359767	0.395729			-0.010783	0.106423	-0.123255	-0.0885115	-0.0731027	-0.0356729	-0.0454844	-0.073686	-0.00636313	-0.1684	0.249474	-0.0448514	0.113284	-0.224341	-0.0721075	0.0999611
ITAS28	0.628954	0.627162	0.743139	0.709827	0.666865	0.667376	0.67147	0.669974	0.63921	0.642502	0.575732	0.650343	0.630795	0.682247	0.549333	0.554825	0.620443			-0.00285004	0.184924	-0.0448253	-0.060525	0.000766906	0.00613345	-0.00222781	-0.0459187	0.00515011	-0.103921	0.129593	-0.0300586	0.0815675	-0.194818	0.00999663	0.118267
ITAS29	0.65146	0.654213	0.736718	0.676894	0.63972	0.618699	0.618777	0.612035	0.574872	0.570881	0.49678	0.609571	0.594097	0.638445	0.542226	0.52759	0.565114			0.00422549	0.126113	-0.0812032	-0.0549188	-0.0328592	0.000126165	-0.0108957	-0.0607205	-0.00694221	-0.129802	0.227045	-0.0253845	0.0746468	-0.150709	-0.0269921	0.071123
ITAS30	0.783226	0.78622	0.846053	0.809026	0.776202	0.762864	0.762803	0.755457	0.73081	0.733025	0.687241	0.755582	0.740612	0.779079	0.704247	0.693432	0.722556			0.00382342	0.0761017	-0.0437643	-0.0405727	-0.0171827	-7.98802e-05	-0.00963117	-0.0326254	0.00303203	-0.0624595	0.0994429	-0.0198134	0.0519402	-0.096052	-0.0153564	0.0419987
ITAS31	0.0417453	0.0484872	0.203036	0.238972	0.214074	0.212489	0.221994	0.207615	0.172661	0.171541	0.1226	0.231751	0.214175	0.234394	0.148634	0.150123	0.161072			0.1615	3.18742	0.17699	-0.104184	-0.00740489	0.0447302	-0.0647715	-0.168358	-0.00648672	-0.285305	0.890304	-0.07584	0.0944031	-0.36588	0.0100198	0.0729369
ITAS32	0.295201	0.287453	0.336177	0.266534	0.231356	0.21925	0.231522	0.225782	0.182773	0.18166	0.131159	0.248704	0.231312	0.253534	0.173859	0.170259	0.183778			-0.0262456	0.169499	-0.207162	-0.131983	-0.0523243	0.0559701	-0.0247902	-0.19049	-0.00608834	-0.277999	0.896202	-0.0699303	0.09607	-0.314256	-0.0207088	0.0794035
ITAS33	0.066136	0.0758579	0.168125	0.187385	0.158518	0.162031	0.170647	0.164156	0.125799	0.113663	0.081856	0.216467	0.199307	0.224395	0.162957	0.160718	0.17053			0.146999	1.21632	0.114556	-0.154054	0.0221653	0.0531747	-0.0380398	-0.233662	-0.096473	-0.279835	1.64449	-0.0792733	0.125875	-0.273793	-0.0137388	0.0610493
ITAS34	0.669384	0.67122	0.745192	0.65764	0.592765	0.470857	0.468005	0.467503	0.444108	0.436676	0.377329	0.467334	0.412378	0.461421	0.317464	0.283398	0.333798			0.00274315	0.110206	-0.11749	-0.0986481	-0.205661	-0.00605583	-0.00107356	-0.0500416	-0.0167353	-0.135906	0.238532	-0.117595	0.118929	-0.311988	-0.107305	0.17784
ITAS35	-0.0285347	-0.0286231	-0.0285414		-0.0285733	-0.0287389	-0.0286383	-0.0285739	-0.0285786		-0.0285714	-0.0285714	-0.0285714	-0.0285714						0.0030991	-0.00285572	-1	#DIV/0!	0.00579665	-0.00350176	-0.00224734	0.000164731	-1	#DIV/0!	3.64292e-16	-9.71445e-16	9.71445e-16	-1	#DIV/0!	#DIV/0!
JPNS1	0.539748	0.557654	0.602017	0.573192	0.568635	0.568614	0.525606	0.489247	0.488187	0.495906	0.477657	0.440954	0.491652	0.436672	0.342697	0.326648	0.361455			0.0331739	0.0795528	-0.0478807	-0.00794906	-3.82644e-05	-0.0756354	-0.0691752	-0.00216674	0.0158108	-0.0367982	-0.0768412	0.114975	-0.111828	-0.215208	-0.0468292	0.106557
JPNS2	0.39612	0.41521	0.403787	0.347526	0.350392	0.349042	0.225156	0.164624	0.26886	0.341768	0.353748	0.168653	0.254227	0.144415	0.0220937	-0.0307604	0.0693062			0.0481922	-0.0275105	-0.139332	0.00824438	-0.00385047	-0.354933	-0.268843	0.633174	0.271174	0.035054	-0.523239	0.507397	-0.431946	-0.847012	-2.39227	-3.2531
JPNS3	0.507695	0.532084	0.573288	0.545846	0.542731	0.541208	0.494562	0.454572	0.451087	0.454038	0.434718	0.404073	0.459896	0.351434	0.246684	0.204882	0.27069			0.0480398	0.0774393	-0.0478691	-0.00570672	-0.00280633	-0.0861875	-0.0808594	-0.00766627	0.00654117	-0.0425527	-0.0704933	0.138151	-0.23584	-0.298065	-0.169454	0.321195
JPNS4	0.0972989	0.105758	0.167907	0.143071	0.145152	0.152652	0.132766	0.112906	0.096587	0.0904088	0.0763311	-0.000296113	0.0344984	-0.00902602	-0.0802751	-0.0760719	-0.0682795			0.0869347	0.587664	-0.147916	0.014542	0.0516698	-0.130269	-0.149585	-0.144537	-0.063965	-0.155712	-1.00388	-117.504	-1.26164	7.89375	-0.0523604	-0.102435
JPNS5	0.0405272	0.00245851	0.0466721	0.0364154	0.0481656	0.039917	0.0332842	0.0385646	0.0352974	0.0360468	0.0515005	0.0355066	0.0354779	0.020781	0.00882882	-0.0100925	-0.00116723			-0.939337	17.9839	-0.219761	0.32267	-0.171254	-0.166165	0.158643	-0.0847198	0.0212331	0.428709	-0.310558	-0.000807431	-0.414256	-0.575149	-2.14313	-0.884347
JPNS6	0.303055	0.303698	0.359386	0.300392	0.306647	0.315715	0.287658	0.241661	0.228054	0.214695	0.204674	0.0930644	0.143416	0.0435282	-0.0253581	0.00495291	0.016998			0.00212192	0.183366	-0.164152	0.0208235	0.0295721	-0.0888678	-0.159901	-0.0563062	-0.0585811	-0.0466721	-0.545305	0.541035	-0.696489	-1.58257	-1.19532	2.43192
JPNS7	0.49905	0.509022	0.537071	0.49181	0.488998	0.495362	0.4272	0.349184	0.348002	0.344407	0.320867	0.248064	0.312662	0.179317	0.0739137	0.00566212	0.0854602			0.0199812	0.0551036	-0.0842729	-0.00571729	0.0130127	-0.137599	-0.182623	-0.00338552	-0.0103292	-0.0683506	-0.226893	0.260407	-0.426482	-0.587805	-0.923396	14.0933
JPNS8	0.469494	0.510862	0.486536	0.448375	0.472668	0.462257	0.373879	0.334121	0.331383	0.402516	0.42367	0.256419	0.35719	0.219417	0.131526	0.0232517	0.211315			0.0881138	-0.0476181	-0.0784351	0.0541808	-0.0220269	-0.191186	-0.10634	-0.0081957	0.214657	0.0525529	-0.394768	0.392997	-0.385715	-0.400567	-0.823216	8.08815
JPNS9	0.346388	0.377221	0.431622	0.395518	0.40816	0.419004	0.32265	0.261335	0.28197	0.296601	0.26442	-0.377944	-0.174932	-0.131573	-0.31394	-0.400104	-0.170639			0.089014	0.144214	-0.0836482	0.031965	0.0265664	-0.22996	-0.190034	0.078959	0.0518875	-0.108498	-2.42933	-0.537147	-0.247865	1.38605	0.27446	-0.573512
JPNS10	-0.0165388	0.0317919	0.0621065	0.0311228	0.0136204	0.0421518	-0.0767061	-0.194895	-0.174847	-0.179121	-0.21164	-0.297027	-0.230652	-0.316693	-0.405867	-0.424348	-0.398164			-2.92226	0.953532	-0.49888	-0.562364	2.09474	-2.81976	1.5408	-0.102865	0.0244432	0.181548	0.403455	-0.223467	0.373035	0.281579	0.045537	-0.0617042
JPNS11	0.344791	0.356295	0.444263	0.3732	0.3893	0.404794	0.396597	0.316961	0.299823	0.32459	0.315709	0.205521	0.260864	0.172725	0.126876	0.123094	0.152077			0.0333662	0.246896	-0.159957	0.0431415	0.0398	-0.0202498	-0.200798	-0.0540709	0.082605	-0.0273607	-0.349017	0.269282	-0.337875	-0.265443	-0.0298063	0.235455
JPNS12	0.39447	0.417777	0.431862	0.379193	0.374036	0.390386	0.28609	0.133455	0.133833	0.128505	0.0987725	-0.082592	0.0479582	-0.158275	-0.3231	-0.38875	-0.269749			0.059083	0.0337146	-0.121958	-0.0135994	0.0437121	-0.26716	-0.533521	0.00283204	-0.0398143	-0.23137	-1.83618	-1.58066	-4.30027	1.04138	0.203187	-0.306113
JPNS13	0.274405	0.278316	0.291208	0.264151	0.268183	0.276479	0.216747	0.151802	0.145102	0.150115	0.139821	-0.295504	-0.160029	-0.108393	-0.4263	-0.425447	-0.147761			0.0142554	0.0463206	-0.092912	0.015261	0.0309348	-0.216044	-0.299635	-0.0441354	0.0345444	-0.0685707	-3.11344	-0.458453	-0.322668	2.93291	-0.00199945	-0.652692
JPNS14	-0.395795	-0.328413	-0.337621	-0.357378	-0.384368	-0.345901	-0.474086	-0.602194	-0.545827	-0.575311	-0.618967	-0.781975	-0.741459	-0.81804	-0.843965	-0.861812	-0.820401			-0.170244	0.0280362	0.0585196	0.0755215	-0.10008	0.370585	0.270222	-0.0936033	0.0540177	0.0758816	0.263355	-0.0518125	0.103284	0.0316914	0.0211475	-0.048051
JPNS15	0.00630248	0.151497	0.310945	0.23789	0.136433	-0.0220107	-0.185894	-0.267045	-0.367614	-0.282039	-0.388513	-0.475859	-0.394162	-0.304793	-0.46748	-0.539831	-0.492476			23.0377	1.05248	-0.234945	-0.426488	-1.16133	7.4456	0.436545	0.3766	-0.232785	0.377513	0.224822	-0.171683	-0.226732	0.533764	0.154768	-0.0877223
JPNS16	0.274663	0.276525	0.309469	0.259109	0.264354	0.278816	0.251663	0.212369	0.204188	0.189884	0.17979	0.0880606	0.138369	0.0612789	0.203841	0.176203	0.219003			0.00677649	0.119138	-0.162732	0.020245	0.0547062	-0.0973891	-0.156137	-0.0385229	-0.0700513	-0.0531605	-0.510203	0.571297	-0.557135	2.32644	-0.135582	0.242897
JPNS17	0.343959	0.38076	0.448454	0.392486	0.386841	0.392952	0.311728	0.235588	0.257118	0.248544	0.229266	0.0931805	0.170949	0.0787713	0.0396429	0.000342428	0.0866126			0.106991	0.177786	-0.124802	-0.0143833	0.0157985	-0.206702	-0.244253	0.0913891	-0.0333463	-0.0775644	-0.593569	0.834595	-0.53921	-0.496735	-0.991362	251.937
JPNS18	0.406455	0.423994	0.47482	0.420937	0.428475	0.444592	0.422022	0.358497	0.321329	0.314078	0.305221	0.239567	0.303195	0.208922	0.131723	0.128841	0.157387			0.0431507	0.119876	-0.113482	0.0179091	0.0376128	-0.0507645	-0.150527	-0.103677	-0.0225648	-0.0281998	-0.215102	0.265596	-0.310934	-0.36951	-0.0218783	0.221558
JPNS19	0.374108	0.382399	0.415683	0.38659	0.382896	0.387995	0.319332	0.247798	0.251457	0.250654	0.231365	0.0996387	0.142062	0.0594876	0.0669702	0.0834867	0.113964			0.0221598	0.0870403	-0.0699877	-0.00955644	0.0133184	-0.17697	-0.224012	0.0147662	-0.00319342	-0.0769534	-0.569344	0.42577	-0.581256	0.125784	0.246626	0.365058
JPNS20	0.456392	0.467543	0.469158	0.417404	0.430252	0.433463	0.367444	0.257813	0.249308	0.254288	0.231851	0.170549	0.251695	0.0812433	-0.0880345	-0.163273	-0.0333742			0.0244343	0.00345291	-0.110312	0.0307807	0.00746426	-0.152307	-0.298362	-0.0329885	0.0199761	-0.0882336	-0.264402	0.475791	-0.677215	-2.08359	0.854655	-0.795593
JPNS21	0.268042	0.290864	0.329699	0.296891	0.292492	0.294636	0.242831	0.187341	0.193186	0.188659	0.172492	0.141254	0.210696	0.0730862	-0.0542879	-0.0788921	-0.0244708			0.0851434	0.133516	-0.0995064	-0.0148181	0.00732962	-0.175828	-0.228511	0.0311993	-0.0234363	-0.0856937	-0.181094	0.491606	-0.65312	-1.74279	0.453216	-0.689819
JPNS22	0.336535	0.369624	0.394187	0.350061	0.347489	0.351297	0.288433	0.22059	0.212763	0.210699	0.191949	0.16676	0.242461	0.0637221	0.0683153	0.0326078	0.0986948			0.098323	0.0664542	-0.111941	-0.00734927	0.0109602	-0.178949	-0.235214	-0.0354822	-0.0096986	-0.0889886	-0.131228	0.453953	-0.737187	0.0720818	-0.522687	2.02673
JPNS23	0.301985	0.316101	0.387322	0.305326	0.306771	0.324378	0.285954	0.211434	0.206583	0.190492	0.17559	0.151356	0.234609	0.114552	0.0665928	0.0647459	0.113276			0.0467426	0.22531	-0.2117	0.00473206	0.0573947	-0.118453	-0.260604	-0.0229432	-0.0778904	-0.078227	-0.138016	0.550047	-0.511731	-0.41867	-0.0277337	0.749545
JPNS24	-0.194338	-0.189562	0.0564385	-0.136827	-0.12098	-0.0432617	-0.0416083	-0.0946132	-0.0924631	-0.0753152	-0.103161	-0.110651	-0.0465549	-0.154357	-0.209217	-0.187212	-0.186542			-0.024572	-1.29773	-3.42436	-0.115817	-0.642407	-0.0382176	1.2739	-0.0227251	-0.185456	0.36972	0.0726085	-0.579265	2.31559	0.355414	-0.10518	-0.00358091
JPNS25	0.0710938	0.0975724	0.097059	0.0685889	0.0717816	0.0710909	0.0463314	0.0117286	0.0141568	0.0141177	0.00398854	-0.050022	-0.0284045	-0.0630537	-0.0865182	-0.0908327	-0.0772039			0.372446	-0.00526152	-0.293328	0.0465474	-0.00962105	-0.34828	-0.746853	0.207027	-0.00275821	-0.71748	-13.5414	-0.43216	1.21985	0.372135	0.0498684	-0.150043
JPNS26	0.236717	0.248907	0.300876	0.231959	0.245439	0.25604	0.226191	0.173159	0.161182	0.157135	0.142574	0.0405288	0.107378	-0.0410783	0.000277126	0.013359	0.04886			0.0514984	0.208787	-0.229056	0.0581163	0.0431914	-0.116578	-0.234459	-0.0691641	-0.0251087	-0.0926653	-0.715736	1.64942	-1.38256	-1.00675	47.2055	2.65746
JPNS27	0.376981	0.393187	0.44099	0.404542	0.41379	0.41579	0.352048	0.283994	0.286079	0.278514	0.258887	0.215549	0.297231	0.1652	0.227647	0.167893	0.263146			0.0429877	0.121578	-0.0826501	0.0228609	0.00483339	-0.153303	-0.19331	0.00734251	-0.0264429	-0.0704714	-0.167403	0.378949	-0.444203	0.378008	-0.262485	0.567343
JPNS28	0.588787	0.588668	0.622796	0.587106	0.582294	0.586084	0.53427	0.475428	0.474273	0.459604	0.442667	0.392022	0.460164	0.348743	0.246753	0.227089	0.285188			-0.000201866	0.0579744	-0.0573063	-0.00819568	0.0065086	-0.0884064	-0.110135	-0.00243014	-0.0309289	-0.0368519	-0.114408	0.17382	-0.242132	-0.292452	-0.0796904	0.255842
JPNS29	0.2035	0.231566	0.26548	0.219871	0.220389	0.226068	0.163056	0.0919172	0.0951657	0.0946125	0.072862	0.034086	0.104291	-0.0222488	-0.128531	-0.162923	-0.0999618			0.137918	0.146452	-0.171796	0.00235435	0.0257695	-0.27873	-0.436285	0.0353412	-0.00581253	-0.22989	-0.532184	2.05965	-1.21333	4.77697	0.267581	-0.386449
JPNS30	0.633698	0.645263	0.678283	0.637892	0.638478	0.645743	0.590542	0.515278	0.510696	0.503019	0.483773	0.437178	0.506122	0.410151	0.322272	0.247538	0.353009			0.0182488	0.0511736	-0.059549	0.000918533	0.0113787	-0.0854839	-0.12745	-0.00889255	-0.0150318	-0.0382608	-0.0963172	0.157704	-0.189621	-0.214261	-0.231896	0.426078
JPNS31	0.247775	0.269654	0.341632	0.297203	0.290542	0.297325	0.270062	0.229472	0.244584	0.224212	0.215819	0.119712	0.165278	0.105708	-0.00272939	-0.025898	0.00371568			0.0883031	0.266927	-0.130051	-0.0224131	0.0233486	-0.0916941	-0.150302	0.0658564	-0.0832901	-0.0374355	-0.445313	0.380634	-0.360424	-1.02582	8.48856	-1.14347
JPNS32	0.0880144	0.094118	0.112391	0.0932114	0.0907504	0.0925925	0.0667605	0.0413424	0.0465965	0.0456316	0.0373733	-0.00220016	0.0184705	-0.0245323	-0.0347586	-0.0429509	-0.028388			0.069348	0.194145	-0.170648	-0.0264023	0.0202981	-0.278985	-0.380735	0.127086	-0.0207082	-0.180977	-1.05887	-9.39504	-2.32819	0.416851	0.235692	-0.339059
JPNS33	0.0925266	0.108122	0.132773	0.114445	0.113107	0.113238	0.0824361	0.055705	0.0597264	0.0594757	0.0514933	-0.0303083	0.00101911	-0.0631029	-0.0348842	-0.0431612	-0.0284927			0.168548	0.227994	-0.138041	-0.0116907	0.00116328	-0.272013	-0.324265	0.0721926	-0.00419867	-0.134212	-1.58859	-1.03362	-62.9196	-0.447186	0.237272	-0.339854
JPNS34	0.502067	0.514083	0.55002	0.510937	0.512215	0.518874	0.452137	0.374748	0.376131	0.368621	0.348064	0.292014	0.360068	0.230004	0.151035	0.0659131	0.176966			0.0239315	0.0699059	-0.0710578	0.00250196	0.0130003	-0.128618	-0.171163	0.00368964	-0.019965	-0.0557675	-0.161036	0.233054	-0.361222	-0.343337	-0.56359	1.68483
JPNS35	0.182406	0.197636	0.246668	0.211173	0.210145	0.224456	0.200541	0.146977	0.159729	0.13495	0.127838	-0.00860777	0.0462967	-0.037551	-0.0328029	-0.0507739	-0.0153052			0.0834919	0.248093	-0.143897	-0.00486613	0.0680979	-0.106545	-0.267099	0.0867628	-0.155133	-0.0526955	-1.06733	-6.37848	-1.81109	-0.126445	0.547851	-0.698563
KORS1	0.391795	0.36405	0.351815	0.321459	0.28169	0.295117	0.291498	0.292118	0.283315	0.310739	0.324872	0.202321	0.217219	0.231357	0.242606	0.219305	0.296881			-0.0708149	-0.0336074	-0.0862842	-0.123715	0.0476676	-0.0122631	0.00212442	-0.0301324	0.0967939	0.0454845	-0.377228	0.0736352	0.0650828	0.0486236	-0.0960459	0.353736
KORS2	-0.155951	-0.19516	-0.217097	-0.19989	-0.21946	-0.220714	-0.221854	-0.240779	-0.216071	-0.232087	-0.262782	-0.213002	-0.194829	-0.187886	-0.194696	-0.191534	-0.183426			0.251424	0.112404	-0.0792586	0.0978994	0.00571451	0.00516485	0.0853056	-0.102615	0.074121	0.132257	-0.189433	-0.0853192	-0.0356353	0.036242	-0.0162369	-0.0423357
KORS3	0.213545	0.199173	0.184218	0.160054	0.111148	0.133977	0.126376	0.122856	0.121218	0.152863	0.15718	0.157656	0.183048	0.161235	0.167779	0.189875	0.291675			-0.0672987	-0.0750883	-0.13117	-0.305556	0.205388	-0.0567358	-0.0278531	-0.0133277	0.261057	0.0282372	0.00303148	0.161059	-0.119163	0.0405826	0.1317	0.536143
KORS4	-0.327296	-0.329908	-0.328826	-0.268699	-0.35221	-0.357785	-0.341327	-0.275713	-0.345859	-0.251828	-0.297772	-0.224195	-0.0851139	-0.130428	-0.297158	-0.328778	-0.348943			0.00797916	-0.00327762	-0.182855	0.310796	0.0158305	-0.046001	-0.192232	0.254418	-0.271878	0.182444	-0.247094	-0.620357	0.53239	1.27833	0.10641	0.0613341
KORS5	-0.119804	-0.109796	-0.121604	-0.0985574	-0.173178	-0.138828	-0.149415	-0.162318	-0.137909	-0.145802	-0.172298	-0.0883909	-0.0116947	-0.0121843	-0.0240369	-0.0350276	-0.0261481			-0.0835377	0.107546	-0.189521	0.757127	-0.19835	0.0762574	0.0863571	-0.150375	0.0572317	0.181728	-0.48699	-0.867693	0.0418624	0.972776	0.457243	-0.253499
KORS6	-0.0317586	-0.0229641	-0.0375215	-0.0167702	-0.0511547	-0.0184227	-0.024597	-0.0244258	-0.0140231	-0.0195826	-0.0714642	-0.0329373	-0.0279644	-0.0395504	-0.0261521	-0.0240493	0.00829679			-0.276917	0.633917	-0.55305	2.05033	-0.639863	0.33515	-0.00696062	-0.425891	0.396455	2.64937	-0.539108	-0.150979	0.414311	-0.338764	-0.0804078	-1.34499
KORS7	-0.193134	-0.197461	-0.204439	-0.167259	-0.212393	-0.186472	-0.204221	-0.225837	-0.218241	-0.216456	-0.207567	-0.104558	-0.0756187	-0.0933132	-0.082648	-0.0522388	0.0629606			0.0224038	0.0353409	-0.181866	0.269849	-0.122043	0.0951818	0.105847	-0.0336345	-0.00818038	-0.0410677	-0.496269	-0.276775	0.233995	-0.114294	-0.367936	-2.20525
KORS8	-0.138649	-0.202817	-0.253791	-0.240043	-0.288921	-0.274547	-0.303004	-0.322759	-0.319114	-0.340665	-0.309303	-0.486182	-0.396878	-0.267136	-0.366157	-0.347923	-0.234828			0.462812	0.251329	-0.0541705	0.203623	-0.0497519	0.103653	0.0651941	-0.0112918	0.0675333	-0.0920614	0.571863	-0.183684	-0.326906	0.370676	-0.0497986	-0.325057
KORS9	-0.31311	-0.384604	-0.400084	-0.406954	-0.47523	-0.453134	-0.479261	-0.49626	-0.476703	-0.502451	-0.478884	-0.678393	-0.56152	-0.507852	-0.628875	-0.648021	-0.573383			0.228337	0.0402468	0.017173	0.167773	-0.0464948	0.057657	0.0354692	-0.0394086	0.0540132	-0.0469049	0.416614	-0.172279	-0.0955772	0.238304	0.0304453	-0.115178
KORS10	-0.377106	-0.359574	-0.407231	-0.38965	-0.42431	-0.356008	-0.369101	-0.415017	-0.378123	-0.395455	-0.415366	-0.567036	-0.545382	-0.539926	-0.596717	-0.598846	-0.506002			-0.0464905	0.132538	-0.0431713	0.0889504	-0.160972	0.0367762	0.124402	-0.0888991	0.0458362	0.0503514	0.365146	-0.0381875	-0.0100038	0.105183	0.0035685	-0.155039
KORS11	-0.267496	-0.303886	-0.371303	-0.383474	-0.454365	-0.387702	-0.396159	-0.428005	-0.376442	-0.413734	-0.430143	-0.316522	-0.28251	-0.270452	-0.325555	-0.327357	-0.243043			0.136038	0.22185	0.0327785	0.184867	-0.146717	0.0218139	0.0803861	-0.120472	0.0990635	0.0396621	-0.264147	-0.107456	-0.0426838	0.203747	0.00553375	-0.25756
KORS12	-0.184002	-0.232137	-0.294852	-0.289494	-0.369694	-0.333496	-0.380101	-0.434342	-0.399711	-0.431605	-0.470964	-0.521913	-0.490457	-0.492838	-0.555906	-0.548635	-0.380737			0.261602	0.27016	-0.0181713	0.277035	-0.0979123	0.139747	0.1427	-0.0797315	0.079792	0.0911936	0.108179	-0.0602701	0.00485463	0.12797	-0.0130805	-0.306028
KORS13	-0.174867	-0.237069	-0.30292	-0.327588	-0.40357	-0.332772	-0.349338	-0.368238	-0.347942	-0.354367	-0.415593	-0.500114	-0.476595	-0.479541	-0.470894	-0.461504	-0.339468			0.355711	0.277772	0.0814312	0.231946	-0.17543	0.0497835	0.0541028	-0.0551165	0.0184631	0.172778	0.203374	-0.0470276	0.0061817	-0.0180328	-0.0199392	-0.264431
KORS14	-0.642978	-0.655446	-0.664636	-0.667932	-0.733733	-0.699553	-0.733217	-0.778428	-0.744669	-0.767879	-0.771172	-0.848055	-0.83199	-0.821495	-0.854202	-0.86193	-0.797235			0.0193899	0.0140217	0.00495891	0.0985146	-0.0465834	0.0481221	0.0616614	-0.0433688	0.0311688	0.00428798	0.0996964	-0.0189436	-0.0126135	0.0398128	0.00904708	-0.075058
KORS15	-0.291904	-0.328284	-0.366973	-0.405831	-0.485688	-0.433231	-0.443493	-0.47769	-0.445287	-0.460596	-0.487715	-0.469312	-0.394915	-0.354251	-0.423612	-0.574116	-0.584782			0.124632	0.117851	0.105888	0.196772	-0.108005	0.0236869	0.0771094	-0.0678326	0.0343789	0.0588785	-0.037733	-0.158523	-0.10297	0.195796	0.355288	0.0185795
KORS16	-0.269357	-0.287211	-0.34911	-0.38586	-0.454089	-0.384076	-0.404276	-0.432081	-0.416223	-0.424009	-0.462891	-0.0983029	-0.0882447	-0.10452	-0.0956222	-0.087517	-0.0517943			0.0662849	0.215519	0.105267	0.176823	-0.154183	0.0525932	0.0687771	-0.0367019	0.0187061	0.0917016	-0.787633	-0.102318	0.184437	-0.0851327	-0.0847623	-0.40818
KORS17	-0.209766	-0.245741	-0.281959	-0.285281	-0.331734	-0.306703	-0.311779	-0.312749	-0.276426	-0.286697	-0.282358	-0.273035	-0.23864	-0.223653	-0.283	-0.217615	-0.155682			0.171503	0.147382	0.0117812	0.162832	-0.0754532	0.0165474	0.00311317	-0.116142	0.0371581	-0.0151357	-0.0330206	-0.12597	-0.0628047	0.265356	-0.231044	-0.284599
KORS18	-0.0333637	-0.0403153	-0.0756217	-0.0697908	-0.110337	-0.0732007	-0.0788299	-0.0783759	-0.0537302	-0.073123	-0.07561	-0.0158223	-0.00131814	-0.0342059	-0.0353903	-0.014301	0.0478279			0.20836	0.875755	-0.0771065	0.580975	-0.336574	0.0769002	-0.00575913	-0.314454	0.360928	0.0340121	-0.790739	-0.916691	24.9501	0.0346272	-0.595905	-4.34437
KORS19	-0.205347	-0.185348	-0.219455	-0.21187	-0.255869	-0.211254	-0.215259	-0.218037	-0.199529	-0.205307	-0.213521	-0.183238	-0.159455	-0.133541	-0.135723	-0.0374543	-0.0236857			-0.0973917	0.184014	-0.034563	0.207673	-0.174368	0.0189592	0.012906	-0.0848867	0.0289578	0.0400079	-0.141826	-0.129794	-0.162517	0.0163422	-0.724039	-0.367611
KORS20	-0.385408	-0.398691	-0.420177	-0.409951	-0.4716	-0.424635	-0.438829	-0.451633	-0.429949	-0.434653	-0.47594	-0.353501	-0.298378	-0.361286	-0.318119	-0.188736	-0.0442931			0.0344642	0.053892	-0.024338	0.150381	-0.0995867	0.0334287	0.0291758	-0.0480107	0.0109386	0.0949887	-0.257256	-0.155935	0.210833	-0.119481	-0.406712	-0.765318
KORS21	-0.383442	-0.406652	-0.422746	-0.410693	-0.47185	-0.433248	-0.451162	-0.466839	-0.446576	-0.45309	-0.478211	-0.435029	-0.409804	-0.407213	-0.390742	-0.29469	-0.178325			0.0605294	0.0395772	-0.0285111	0.148912	-0.0818095	0.0413487	0.0347459	-0.0434042	0.0145863	0.0554443	-0.0902985	-0.0579839	-0.00632294	-0.0404498	-0.245819	-0.394873
KORS22	-0.172715	-0.179228	-0.194753	-0.171304	-0.216729	-0.189176	-0.206881	-0.228679	-0.221153	-0.22464	-0.238378	-0.0933788	-0.0604282	-0.103829	-0.0887028	-0.02789	0.110748			0.0377099	0.0866238	-0.120404	0.265167	-0.127131	0.0935928	0.105364	-0.0329122	0.0157667	0.0611555	-0.608274	-0.35287	0.718223	-0.145684	-0.68558	-4.9709
KORS23	-0.126457	-0.150553	-0.203263	-0.196911	-0.24311	-0.236874	-0.229665	-0.255103	-0.22624	-0.23436	-0.268707	-0.234635	-0.194468	-0.170381	-0.154394	-0.0693971	0.01963			0.190542	0.350111	-0.0312482	0.234615	-0.0256513	-0.0304315	0.110759	-0.113141	0.0358892	0.146556	-0.1268	-0.171187	-0.12386	-0.0938313	-0.55052	-1.28287
KORS24	-0.268041	-0.302858	-0.223957	-0.263744	-0.253383	-0.2344	-0.229911	-0.222216	-0.254072	-0.24589	-0.205985	-0.279125	-0.223617	-0.259928	-0.273249	-0.324592	-0.218433			0.129892	-0.260522	0.177655	-0.0392832	-0.0749169	-0.0191545	-0.0334653	0.143351	-0.0322013	-0.162288	0.355075	-0.198867	0.162382	0.0512514	0.187896	-0.327052
KORS25	-0.146077	-0.180984	-0.11262	-0.106779	-0.110736	-0.111109	-0.107731	-0.15637	-0.121683	-0.13435	-0.0988714	-0.175723	-0.151021	-0.185568	-0.16773	-0.128499	-0.0731151			0.238969	-0.377739	-0.0518631	0.0370631	0.00336887	-0.0304041	0.451482	-0.221826	0.104096	-0.264074	0.777291	-0.140577	0.228761	-0.096129	-0.233893	-0.431005
KORS26	-0.174117	-0.223248	-0.261877	-0.233767	-0.294687	-0.262113	-0.276093	-0.271738	-0.280435	-0.273123	-0.328541	-0.306274	-0.295258	-0.260383	-0.25458	-0.218785	-0.0929195			0.282171	0.173033	-0.107342	0.260604	-0.110538	0.0533346	-0.0157721	0.0320061	-0.0260735	0.202902	-0.067775	-0.035966	-0.118119	-0.0222875	-0.140604	-0.575293
KORS27	-0.175267	-0.155516	-0.183543	-0.168856	-0.205236	-0.159898	-0.16487	-0.16083	-0.128661	-0.145147	-0.124841	-0.147887	-0.114342	-0.128404	-0.112219	-0.0725525	0.0461068			-0.11269	0.18022	-0.0800231	0.215454	-0.220906	0.0310896	-0.0245009	-0.200022	0.128139	-0.139898	0.1846	-0.22683	0.122981	-0.126046	-0.353473	-1.6355
KORS28	-0.00194497	-0.0630666	-0.123466	-0.0943903	-0.162183	-0.105791	-0.11264	-0.135255	-0.121858	-0.131	-0.199977	-0.0765097	-0.00989751	-0.0276612	0.0090792	0.10153	0.168928			31.4254	0.957703	-0.235493	0.718218	-0.347704	0.0647388	0.200772	-0.0990517	0.0750246	0.526539	-0.617408	-0.870637	1.79477	-1.32823	10.1826	0.663828
KORS29	-0.0951521	-0.116601	-0.172164	-0.177904	-0.226007	-0.175218	-0.18461	-0.182851	-0.14347	-0.16499	-0.164983	-0.0268653	-0.0104357	-0.0400124	-0.0324341	0.00307204	0.0959484			0.225422	0.47652	0.0333371	0.270389	-0.224726	0.0536067	-0.00953076	-0.215373	0.149998	-4.38074e-05	-0.837163	-0.611556	2.8342	-0.189399	-1.09472	30.2328
KORS30	-0.261295	-0.276811	-0.266821	-0.224477	-0.301641	-0.262844	-0.289424	-0.321425	-0.306586	-0.329913	-0.347945	-0.189106	-0.138566	-0.147095	-0.146889	-0.082428	0.0919502			0.0593793	-0.0360909	-0.158696	0.343748	-0.12862	0.101126	0.110567	-0.0461663	0.0760875	0.054655	-0.456507	-0.267257	0.0615566	-0.00140284	-0.438842	-2.11552
KORS31	-0.0689921	-0.0732878	-0.0533472	-0.0304327	-0.0342063	-0.0488473	-0.0499408	-0.0387251	-0.0435812	-0.0465719	-0.0541728	-0.0295339	-0.0298495	-0.0290715	-0.0286245	-0.0277469	-0.0288759			0.0622641	-0.272087	-0.429535	0.123997	0.428022	0.0223851	-0.22458	0.1254	0.0686238	0.163207	-0.454821	0.0106865	-0.0260623	-0.015377	-0.0306599	0.0406896
KORS32	-0.051527	-0.0948051	-0.0937943	-0.0925217	-0.103681	-0.0950523	-0.10066	-0.11085	-0.11758	-0.116772	-0.120435	-0.0804484	-0.0647841	-0.095151	-0.0646918	-0.0584505	-0.0307798			0.839909	-0.0106611	-0.0135682	0.120613	-0.0832241	0.0589976	0.101226	0.0607219	-0.00687834	0.0313706	-0.332017	-0.194713	0.468741	-0.320115	-0.096477	-0.473404
KORS33	-0.0419863	-0.0528089	-0.0679838	-0.105582	-0.120117	-0.12039	-0.129428	-0.145162	-0.149877	-0.149164	-0.158869	-0.0855163	-0.0791053	-0.0901213	-0.0847831	-0.0783868	-0.0567524			0.257765	0.287354	0.553042	0.137669	0.00227482	0.0750719	0.121563	0.0324789	-0.00475732	0.0650672	-0.461718	-0.0749692	0.139258	-0.0592334	-0.0754434	-0.275996
KORS34	-0.203307	-0.196506	-0.170652	-0.238891	-0.319322	-0.288215	-0.295969	-0.33876	-0.305488	-0.322723	-0.338356	-0.153869	-0.132701	-0.147085	-0.136195	-0.119185	-0.0471929			-0.0334515	-0.131568	0.399871	0.336686	-0.0974176	0.0269047	0.144579	-0.0982186	0.0564179	0.0484421	-0.545244	-0.137577	0.108399	-0.0740377	-0.124899	-0.604035
KORS35																				#DIV/0!	#DIV/0!	#DIV/0!	#DIV/0!	#DIV/0!	#DIV/0!	#DIV/0!	#DIV/0!	#DIV/0!	#DIV/0!	#DIV/0!	#DIV/0!	#DIV/0!	#DIV/0!	#DIV/0!	#DIV/0!
LTUS1	-0.28442	-0.575508	-0.307897	-0.438261	-0.456606	-0.781859	-0.747157	-0.66448	-0.625271	-0.745005	-0.75961	-0.68159	-0.843638	-0.858639	-0.871076	-0.896635	-0.807301			1.02344	-0.465	0.423403	0.0418591	0.712326	-0.0443832	-0.110657	-0.0590068	0.191492	0.0196028	-0.102709	0.237749	0.0177805	0.014485	0.0293424	-0.0996327
LTUS2	-0.187033	-0.587675	-0.410259	-0.475015	-0.546562	-0.545159	-0.576879	-0.550318	-0.345244	-0.59871	-0.649474	-0.512995	-0.45567	-0.45155	-0.401399	-0.366696	-0.283967			2.14209	-0.301895	0.157843	0.15062	-0.00256592	0.0581848	-0.0460428	-0.372647	0.734164	0.08479	-0.210138	-0.111746	-0.00904137	-0.111064	-0.0864549	-0.225608
LTUS3	-0.379769	-0.410508	-0.41413	-0.43921	-0.466389	-0.549929	-0.540156	-0.492683	-0.532408	-0.503796	-0.533017	-0.395113	-0.430934	-0.447175	-0.393948	-0.422541	-0.392341			0.0809408	0.008824	0.0605617	0.0618808	0.17912	-0.0177701	-0.0878885	0.0806304	-0.053741	0.0580014	-0.258724	0.0906596	0.0376898	-0.11903	0.072582	-0.0714729
LTUS4	-0.512423	-0.425311	-0.435018	-0.455103	-0.451374	-0.46362	-0.424545	-0.421955	-0.571578	-0.467782	-0.31301	-0.404828	-0.365808	-0.704181	-0.527417	-0.297455	-0.299658			-0.170001	0.0228239	0.0461701	-0.00819281	0.0271298	-0.0842825	-0.0061007	0.354596	-0.181595	-0.330863	0.293338	-0.0963879	0.925004	-0.251021	-0.436016	0.00740749
LTUS5	-0.183565	-0.0690969	-0.083931	-0.119668	-0.149765	-0.167919	-0.166846	-0.169011	-0.123902	-0.132123	-0.142613	-0.217607	-0.088096	-0.109137	-0.0860642	-0.0424185	-0.0581975			-0.623584	0.214686	0.425795	0.251498	0.121218	-0.00639086	0.0129755	-0.266899	0.0663491	0.0794009	0.525852	-0.59516	0.238842	-0.211412	-0.50713	0.371986
LTUS6	-0.267794	-0.0481521	-0.143602	-0.106614	-0.0939529	-0.271497	-0.258004	-0.273773	-0.368012	-0.446312	-0.48714	-0.534412	-0.588472	-0.596825	-0.544775	-0.49656	-0.188909			-0.82019	1.98227	-0.257573	-0.118759	1.88971	-0.0496968	0.0611171	0.344225	0.212763	0.0914787	0.0970415	0.101157	0.0141949	-0.0872129	-0.0885042	-0.619565
LTUS7	-0.194997	-0.218488	-0.270545	-0.256238	-0.247626	-0.222148	-0.215979	-0.25965	-0.392335	-0.558989	-0.587129	-0.255052	-0.146084	-0.136757	-0.128893	-0.220578	-0.135158			0.120466	0.238261	-0.0528822	-0.0336106	-0.10289	-0.0277667	0.2022	0.511012	0.424777	0.0503405	-0.565594	-0.427238	-0.0638487	-0.0575032	0.711328	-0.387255
LTUS8	-0.22746	-0.813713	-0.637651	-0.672635	-0.731022	-0.74666	-0.791832	-0.756298	-0.8056	-0.800868	-0.823449	-0.720123	-0.740725	-0.544647	-0.506974	-0.587678	-0.490285			2.5774	-0.21637	0.054864	0.0868043	0.0213913	0.060499	-0.0448757	0.0651894	-0.00587498	0.0281964	-0.125479	0.0286083	-0.264711	-0.0691696	0.159188	-0.165724
LTUS9	-0.665928	-0.683727	-0.647392	-0.726959	-0.771742	-0.763071	-0.7854	-0.718548	-0.744974	-0.727034	-0.76423	-0.58969	-0.525628	-0.717246	-0.681467	-0.689923	-0.646995			0.0267278	-0.0531434	0.122905	0.0616028	-0.0112359	0.0292624	-0.0851185	0.036778	-0.0240815	0.0511607	-0.228387	-0.108636	0.364549	-0.049884	0.0124089	-0.0622211
LTUS10	-0.370359	-0.323591	-0.293881	-0.361805	-0.354611	-0.353035	-0.336914	-0.378434	-0.357925	-0.375812	-0.473748	-0.323072	-0.430956	-0.433813	-0.402007	-0.397767	-0.310806			-0.126276	-0.0918141	0.231126	-0.019882	-0.00444464	-0.0456655	0.123237	-0.0541948	0.0499759	0.260598	-0.318051	0.33393	0.00662915	-0.0733165	-0.0105477	-0.218624
LTUS11	-0.362541	-0.366797	-0.380126	-0.302638	-0.324328	-0.53601	-0.580941	-0.535215	-0.720867	-0.583693	-0.601421	-0.46795	-0.299162	-0.271131	-0.264941	-0.175276	-0.11123			0.0117403	0.0363383	-0.203848	0.0716723	0.652677	0.083825	-0.0787102	0.346873	-0.190289	0.030371	-0.221927	-0.360697	-0.0936966	-0.0228319	-0.338432	-0.365401
LTUS12	-0.036503	-0.0929771	-0.366254	-0.202336	-0.0732253	-0.272018	-0.277293	-0.361243	-0.571519	-0.489878	-0.526081	-0.504281	-0.466937	-0.505994	-0.604466	-0.52591	-0.488569			1.54711	2.93919	-0.447554	-0.6381	2.71481	0.0193914	0.302748	0.582092	-0.142848	0.0739001	-0.041437	-0.074054	0.083644	0.194612	-0.12996	-0.0710025
LTUS13	-0.175995	-0.267313	-0.149441	-0.191605	-0.195744	-0.364408	-0.340002	-0.258753	-0.211455	-0.329871	-0.375451	-0.370577	-0.454144	-0.44164	-0.341771	-0.413815	-0.390362			0.518869	-0.440952	0.282143	0.0216037	0.861653	-0.0669738	-0.238967	-0.182792	0.560009	0.138175	-0.0129819	0.225507	-0.0275341	-0.226132	0.210795	-0.0566744
LTUS14	-0.129659	-0.135735	-0.236247	-0.255934	-0.301271	-0.334843	-0.324165	-0.270154	-0.249898	-0.330601	-0.260391	-0.372985	-0.426646	-0.379092	-0.471764	-0.34956	-0.255288			0.04686	0.740498	0.0833349	0.177144	0.111433	-0.0318895	-0.166616	-0.0749804	0.322946	-0.212373	0.432406	0.14387	-0.111461	0.244458	-0.259037	-0.269688
LTUS15	-0.201072	-0.165033	-0.0911994	-0.219048	-0.217025	-0.346838	-0.175878	-0.141097	-0.367807	-0.411043	-0.301387	-0.321718	-0.340584	-0.395227	-0.32192	-0.345776	-0.134516			-0.179235	-0.447386	1.40186	-0.00923686	0.598147	-0.492909	-0.197758	1.60677	0.117552	-0.266775	0.0674564	0.0586431	0.16044	-0.185481	0.0741037	-0.610973
LTUS16	0.118857	0.150235	0.0625178	-0.275544	-0.405714	-0.424042	-0.493341	-0.475707	-0.507319	-0.617481	-0.671743	-0.609524	-0.602577	-0.642599	-0.595153	-0.510636	-0.478667			0.263998	-0.583866	-5.40744	0.472415	0.0451729	0.163426	-0.0357446	0.0664525	0.217145	0.087876	-0.0926228	-0.0113977	0.0664185	-0.073835	-0.142009	-0.0626071
LTUS17	-0.27777	-0.191055	-0.233644	-0.234728	-0.25176	-0.253218	-0.238766	-0.315504	-0.316456	-0.385259	-0.50488	-0.364762	-0.27778	-0.213571	-0.100384	-0.211871	-0.102157			-0.312183	0.222915	0.0046421	0.0725585	0.00579288	-0.0570765	0.321396	0.00301667	0.217419	0.310495	-0.277527	-0.238462	-0.23115	-0.529975	1.11061	-0.517835
LTUS18	-0.164834	-0.190268	-0.591879	-0.373092	-0.198747	-0.48398	-0.498167	-0.585111	-0.485442	-0.28296	-0.558554	0.033437	-0.139551	-0.125402	0.115753	-0.196952	0.0470524			0.154305	2.11076	-0.369647	-0.467299	1.43516	0.0293119	0.174529	-0.170342	-0.417109	0.973969	-1.05986	-5.17355	-0.101393	-1.92306	-2.70149	-1.2389
LTUS19	-0.398042	-0.334389	-0.367695	-0.361167	-0.339214	-0.334507	-0.343444	-0.41947	-0.547324	-0.5162	-0.557062	-0.572033	-0.407061	-0.466358	-0.286784	-0.295731	-0.124841			-0.159917	0.0996021	-0.0177518	-0.0607854	-0.013874	0.0267162	0.221362	0.304799	-0.0568658	0.0791599	0.0268746	-0.288395	0.145669	-0.385056	0.0311996	-0.577855
LTUS20	-0.566861	-0.554433	-0.64496	-0.626063	-0.567226	-0.548062	-0.553014	-0.544072	-0.669135	-0.652694	-0.68076	-0.516854	-0.579938	-0.51621	-0.506405	-0.636843	-0.562079			-0.0219235	0.163277	-0.029299	-0.0939785	-0.033787	0.00903564	-0.0161688	0.229864	-0.0245691	0.0429993	-0.240769	0.122053	-0.109887	-0.0189945	0.257577	-0.117399
LTUS21	-0.245262	-0.319645	-0.238268	-0.351768	-0.371388	-0.481632	-0.460325	-0.390247	-0.372619	-0.451467	-0.477169	-0.367993	-0.414833	-0.421285	-0.416977	-0.503969	-0.438301			0.303275	-0.254585	0.476356	0.0557747	0.296843	-0.0442391	-0.152236	-0.0451702	0.211604	0.0569297	-0.228799	0.127285	0.0155543	-0.010226	0.208625	-0.130302
LTUS22	-0.190178	-0.197872	-0.227507	-0.218313	-0.216756	-0.199228	-0.196329	-0.195187	-0.210256	-0.203167	-0.247352	-0.177615	-0.146705	-0.136766	-0.128769	-0.222513	-0.123796			0.0404542	0.149771	-0.0404138	-0.00713111	-0.0808636	-0.0145542	-0.00581397	0.0772031	-0.0337175	0.217478	-0.281932	-0.17403	-0.0677482	-0.0584714	0.728	-0.443644
LTUS23	-0.377208	-0.420578	-0.467515	-0.444896	-0.420045	-0.490923	-0.535471	-0.622357	-0.737091	-0.706484	-0.729438	-0.738257	-0.37306	-0.498606	-0.378376	-0.470696	-0.386702			0.114977	0.111602	-0.0483818	-0.0558577	0.168737	0.0907454	0.16226	0.184355	-0.0415239	0.0324901	0.0120896	-0.494675	0.336529	-0.241131	0.24399	-0.178447
LTUS24	-0.104644	-0.130782	-0.184434	-0.154807	-0.158944	-0.123873	-0.12831	-0.151583	-0.197842	-0.217693	-0.362457	-0.197702	-0.107634	-0.096922	-0.101352	-0.114991	-0.103333			0.249777	0.410239	-0.160637	0.0267239	-0.220648	0.0358123	0.181381	0.305175	0.100339	0.664993	-0.45455	-0.455573	-0.0995264	0.0457033	0.134571	-0.101382
LTUS25	-0.173299	-0.100631	-0.0831852	-0.172336	-0.153195	-0.132272	-0.14219	-0.137018	-0.138556	-0.129232	-0.224928	-0.142832	-0.122084	-0.0871974	-0.136979	-0.171549	-0.135502			-0.419321	-0.173367	1.07172	-0.111072	-0.136576	0.0749817	-0.036371	0.0112236	-0.0672981	0.740506	-0.36499	-0.145262	-0.285757	0.570908	0.252372	-0.210124
LTUS26	-0.586647	-0.484914	-0.504048	-0.483655	-0.437313	-0.443276	-0.462588	-0.574804	-0.558957	-0.594447	-0.706465	-0.752939	-0.744221	-0.816933	-0.722212	-0.715841	-0.420241			-0.173414	0.0394586	-0.0404588	-0.0958171	0.0136361	0.0435666	0.242584	-0.0275699	0.0634933	0.188441	0.065783	-0.0115784	0.0977024	-0.115947	-0.00882056	-0.412941
LTUS27	-0.204268	-0.237418	-0.279328	-0.282085	-0.281019	-0.324889	-0.358675	-0.40531	-0.505555	-0.482327	-0.539494	-0.516449	-0.289044	-0.391199	-0.280033	-0.328419	-0.259114			0.162288	0.176526	0.00986931	-0.00377886	0.156108	0.103993	0.130022	0.247328	-0.045946	0.118524	-0.0427152	-0.440324	0.353421	-0.284167	0.172788	-0.211026
LTUS28	-0.0877828	-0.121983	-0.210872	-0.181928	-0.17889	-0.143207	-0.121162	-0.123927	-0.278949	-0.27778	-0.413156	-0.300414	0.00999402	0.0381647	0.0278447	-0.126265	0.100048			0.389599	0.728699	-0.13726	-0.0166965	-0.199471	-0.153933	0.0228153	1.25092	-0.00419319	0.487352	-0.272881	-1.03327	2.81875	-0.270407	-5.5346	-1.79237
LTUS29	-0.0443618	-0.0934458	-0.192103	-0.167644	-0.165861	-0.080812	-0.0899513	-0.150697	-0.313953	-0.320621	-0.423712	-0.351325	0.039932	0.0877038	0.118019	-0.0482072	0.0978162			1.10645	1.05577	-0.127324	-0.0106323	-0.512774	0.113094	0.675313	1.08334	0.0212401	0.321536	-0.170839	-1.11366	1.19633	0.345657	-1.40847	-3.02908
LTUS30	-0.167251	-0.238354	-0.345169	-0.338395	-0.295068	-0.241131	-0.218677	-0.217863	-0.32334	-0.345081	-0.390282	-0.0736747	0.126267	0.173698	0.168934	-0.0997898	0.126595			0.425125	0.448135	-0.0196226	-0.128038	-0.182795	-0.0931211	-0.00372034	0.484141	0.06724	0.130986	-0.811227	-2.71385	0.375634	-0.0274284	-1.5907	-2.26862
LTUS31	-0.247357	-0.084368	-0.49788	-0.17272	-0.105363	-0.201699	-0.219291	-0.215812	-0.228468	-0.265485	-0.2752	-0.126813	-0.0935124	-0.0845899	-0.106817	-0.120875	-0.112377			-0.658922	4.9013	-0.65309	-0.389978	0.91433	0.0872167	-0.015865	0.0586431	0.162023	0.0365961	-0.539197	-0.262596	-0.0954152	0.262761	0.131614	-0.0703104
LTUS32	-0.0813039	-0.136725	-0.159913	-0.120746	-0.119373	-0.0959493	-0.0900877	-0.0882922	-0.117344	-0.119337	-0.166354	-0.122846	-0.068963	-0.0637054	-0.117041	-0.169396	-0.126343			0.681659	0.169593	-0.244928	-0.0113739	-0.19622	-0.0610902	-0.0199315	0.329042	0.0169803	0.393994	-0.261541	-0.438622	-0.0762384	0.837232	0.447318	-0.254156
LTUS33	-0.129486	-0.141654	-0.185708	-0.165197	-0.160485	-0.13885	-0.128146	-0.12725	-0.200497	-0.202189	-0.275432	-0.216764	-0.0766306	-0.0686778	-0.0685155	-0.164095	-0.0628185			0.0939753	0.310995	-0.110446	-0.0285234	-0.134813	-0.0770894	-0.00698738	0.575608	0.00843706	0.362252	-0.213003	-0.646479	-0.10378	-0.00236408	1.39501	-0.617182
LTUS34	-0.105726	-0.11607	-0.1594	-0.12587	-0.155526	-0.126632	-0.166229	-0.114751	-0.129732	-0.139128	-0.183771	-0.114731	-0.0772125	-0.0630388	-0.114661	-0.214068	-0.12829			0.0978341	0.373318	-0.210354	0.235609	-0.18578	0.312685	-0.30968	0.130556	0.0724191	0.320878	-0.375682	-0.327014	-0.183567	0.818888	0.866974	-0.400704
LTUS35	-0.0285714	-0.0285714	-0.0285714	-0.0285714	-0.0285714	-0.0285714	-0.0285714	-0.0285714	-0.0285714	-0.0285714	-0.0285714	-0.0285714	-0.0285714	-0.0285714	-0.0285715	-0.0285714	-0.0285714			-1.27372e-08	2.58722e-09	-1.79329e-08	2.21016e-08	-1.82467e-08	-4.13206e-09	2.8688e-08	-4.52722e-09	-1.65365e-08	2.63993e-09	7.37237e-09	4.20775e-08	-6.45303e-10	1.60201e-06	-1.56616e-06	-9.45254e-08
LUXS1	-0.321129	-0.322598	-0.31734	-0.478594	-0.649915	-0.506449	-0.530492	-0.538929	-0.504738	-0.410459	-0.445379	-0.363068	-0.343321	-0.355283	-0.366657	-0.380027	-0.375628			0.00457429	-0.0162972	0.508141	0.357966	-0.220746	0.0474745	0.0159046	-0.0634432	-0.186787	0.0850742	-0.184812	-0.0543883	0.034843	0.0320135	0.0364631	-0.0115744
LUXS2	-0.430336	-0.432957	-0.400298	-0.355925	-0.370369	-0.398203	-0.363126	-0.325554	-0.324661	-0.302111	-0.314135	-0.306011	-0.275357	-0.277502	-0.240104	-0.256914	-0.245272			0.00609181	-0.0754331	-0.110849	0.0405807	0.0751519	-0.0880878	-0.103469	-0.00274177	-0.0694598	0.0398	-0.0258601	-0.100174	0.00779053	-0.134767	0.0700127	-0.0453137
LUXS3	-0.443949	-0.445152	-0.439809	-0.421532	-0.435373	-0.462715	-0.47427	-0.470465	-0.480469	-0.477978	-0.500755	-0.50452	-0.492246	-0.501145	-0.542292	-0.553161	-0.538863			0.00271032	-0.0120032	-0.0415561	0.0328346	0.0628017	0.0249712	-0.00802217	0.0212645	-0.00518543	0.0476521	0.00752039	-0.0243292	0.018078	0.0821058	0.0200426	-0.0258477
LUXS4	-0.537273	-0.481699	-0.440389	-0.288304	-0.314854	-0.325294	-0.308522	-0.280713	-0.28272	-0.256306	-0.263533	-0.296241	-0.310407	-0.300304	-0.311303	-0.318574	-0.289558			-0.103438	-0.0857589	-0.345342	0.0920903	0.0331575	-0.0515599	-0.0901359	0.00715248	-0.0934282	0.0281943	0.124113	0.0478203	-0.0325465	0.0366262	0.0233572	-0.0910808
LUXS5																				#DIV/0!	#DIV/0!	#DIV/0!	#DIV/0!	#DIV/0!	#DIV/0!	#DIV/0!	#DIV/0!	#DIV/0!	#DIV/0!	#DIV/0!	#DIV/0!	#DIV/0!	#DIV/0!	#DIV/0!	#DIV/0!
LUXS6	-0.335908	-0.337418	-0.35881	-0.376322	-0.371186	-0.394081	-0.346551	-0.373984	-0.365874	-0.33029	-0.331862	-0.229481	-0.273415	-0.300775	-0.309602	-0.293611	-0.297295			0.0044959	0.0633974	0.0488048	-0.0136479	0.0616811	-0.120609	0.0791592	-0.021686	-0.0972568	0.0047594	-0.308503	0.191446	0.10007	0.0293469	-0.0516501	0.0125465
LUXS7	-0.488369	-0.472033	-0.440773	-0.430022	-0.380807	-0.492447	-0.540433	-0.3568	-0.34275	-0.319846	-0.318251	-0.426116	-0.354659	-0.464198	-0.560733	-0.51163	-0.493622			-0.0334505	-0.0662242	-0.0243895	-0.114448	0.293166	0.0974445	-0.339789	-0.0393781	-0.0668243	-0.0049857	0.33893	-0.167695	0.308859	0.207961	-0.0875702	-0.0351974
LUXS8																				#DIV/0!	#DIV/0!	#DIV/0!	#DIV/0!	#DIV/0!	#DIV/0!	#DIV/0!	#DIV/0!	#DIV/0!	#DIV/0!	#DIV/0!	#DIV/0!	#DIV/0!	#DIV/0!	#DIV/0!	#DIV/0!
LUXS9	-0.646493	-0.529648	-0.540614	-0.520101	-0.52354	-0.53555	-0.520171	-0.56785	-0.568413	-0.535603	-0.560608	-0.455988	-0.412775	-0.478001	-0.525866	-0.502595	-0.477698			-0.180737	0.0207049	-0.0379438	0.00661321	0.0229394	-0.0287161	0.0916599	0.000991737	-0.0577232	0.0466866	-0.186619	-0.0947683	0.158018	0.100135	-0.0442513	-0.0495383
LUXS10	-0.427627	-0.430977	-0.385751	-0.414461	-0.45917	-0.444967	-0.415399	-0.430973	-0.424632	-0.380217	-0.396555	-0.584962	-0.587189	-0.624689	-0.599441	-0.574956	-0.567216			0.00783247	-0.104938	0.0744257	0.107872	-0.0309312	-0.06645	0.037491	-0.0147129	-0.104597	0.0429714	0.475109	0.00380681	0.0638629	-0.0404163	-0.0408464	-0.0134624
LUXS11	-0.611433	-0.604303	-0.58892	-0.69342	-0.71213	-0.673189	-0.701929	-0.658384	-0.664472	-0.654933	-0.637408	-0.831878	-0.751288	-0.679056	-0.711535	-0.729551	-0.634441			-0.0116614	-0.0254562	0.177445	0.0269814	-0.0546827	0.0426936	-0.0620368	0.00924718	-0.0143555	-0.0267596	0.305097	-0.096878	-0.0961433	0.0478291	0.0253203	-0.130369
LUXS12	-0.811811	-0.81893	-0.757583	-0.758114	-0.755409	-0.729614	-0.725836	-0.725869	-0.722163	-0.711898	-0.725456	-0.787624	-0.767205	-0.766119	-0.775984	-0.760089	-0.742913			0.00876929	-0.0749116	0.000701663	-0.00356842	-0.0341475	-0.00517787	4.52033e-05	-0.00510557	-0.0142135	0.0190448	0.085695	-0.0259254	-0.00141531	0.0128775	-0.0204843	-0.0225975
LUXS13	-0.371246	-0.392743	-0.323385	-0.298298	-0.335333	-0.340762	-0.323615	-0.360838	-0.351053	-0.296942	-0.327818	-0.39153	-0.407719	-0.453189	-0.457039	-0.454944	-0.43719			0.0579037	-0.176598	-0.0775783	0.124155	0.0161906	-0.0503182	0.11502	-0.0271175	-0.154137	0.103979	0.19435	0.0413483	0.111523	0.00849565	-0.00458509	-0.039024
LUXS14	-0.246623	-0.239324	-0.247248	-0.231172	-0.242448	-0.256746	-0.251237	-0.290668	-0.295865	-0.255309	-0.20387	-0.303318	-0.366084	-0.410274	-0.42248	-0.412662	-0.399374			-0.029597	0.0331126	-0.0650199	0.048777	0.0589743	-0.0214571	0.156948	0.0178768	-0.137074	-0.201476	0.487799	0.20693	0.120712	0.0297492	-0.0232387	-0.0322012
LUXS15	-0.231009	-0.275049	-0.235507	-0.253538	-0.22689	-0.234553	-0.227441	-0.237032	-0.229593	-0.187767	-0.206743	-0.223453	-0.305538	-0.183759	-0.279747	-0.273808	-0.350457			0.190646	-0.143766	0.0765644	-0.105103	0.0337722	-0.0303225	0.0421697	-0.0313847	-0.182172	0.101059	0.0808261	0.367344	-0.398573	0.522361	-0.0212299	0.279939
LUXS16	-0.200161	-0.201825	-0.158414	-0.171303	-0.118273	-0.131945	-0.120305	-0.12421	-0.126468	-0.111995	-0.109876	-0.130957	-0.158724	-0.148493	-0.15451	-0.151113	-0.150959			0.00831266	-0.215089	0.0813596	-0.309569	0.115602	-0.0882213	0.0324556	0.0181852	-0.114443	-0.0189233	0.191864	0.212035	-0.0644561	0.0405176	-0.0219842	-0.00102432
LUXS17	-0.662471	-0.669148	-0.609305	-0.554277	-0.57105	-0.610815	-0.590335	-0.490819	-0.497765	-0.484304	-0.531984	-0.537671	-0.510683	-0.524912	-0.611693	-0.638105	-0.618553			0.0100785	-0.0894313	-0.0903122	0.0302601	0.0696345	-0.0335286	-0.168575	0.014151	-0.0270421	0.0984512	0.0106897	-0.0501938	0.0278614	0.165326	0.0431785	-0.0306414
LUXS18	-0.573611	-0.602679	-0.596873	-0.589188	-0.605519	-0.6529	-0.675573	-0.697556	-0.686544	-0.686509	-0.685924	-0.766808	-0.679598	-0.739152	-0.781425	-0.756637	-0.727984			0.0506759	-0.00963421	-0.0128759	0.027718	0.0782484	0.0347269	0.0325397	-0.015787	-5.01781e-05	-0.000852927	0.117921	-0.113731	0.0876306	0.0571917	-0.0317215	-0.0378697
LUXS19	-0.326032	-0.380706	-0.376595	-0.375085	-0.392517	-0.426309	-0.431441	-0.484929	-0.501111	-0.471462	-0.513223	-0.507193	-0.572253	-0.61898	-0.654754	-0.63683	-0.612086			0.167696	-0.0107984	-0.00401151	0.046477	0.08609	0.0120375	0.123976	0.0333688	-0.0591663	0.0885784	-0.0117494	0.128274	0.0816546	0.057796	-0.0273756	-0.0388554
LUXS20	-0.558944	-0.709901	-0.595755	-0.678711	-0.695408	-0.720417	-0.751486	-0.684553	-0.683471	-0.664974	-0.685756	-0.696914	-0.637311	-0.711441	-0.729046	-0.705824	-0.686866			0.270077	-0.160792	0.139245	0.0246	0.035964	0.0431264	-0.0890681	-0.00158079	-0.0270621	0.0312523	0.0162702	-0.0855235	0.116316	0.024745	-0.0318523	-0.0268597
LUXS21	-0.688442	-0.753816	-0.731193	-0.688251	-0.708293	-0.753015	-0.765294	-0.771372	-0.767204	-0.755513	-0.636668	-0.694718	-0.617549	-0.68656	-0.697959	-0.677097	-0.653616			0.0949595	-0.0300114	-0.058728	0.0291205	0.0631402	0.0163063	0.00794176	-0.00540381	-0.0152384	-0.157304	0.0911783	-0.11108	0.111751	0.0166033	-0.0298909	-0.034679
LUXS22	-0.592551	-0.600001	-0.59175	-0.565141	-0.579268	-0.607885	-0.624865	-0.612949	-0.624945	-0.633848	-0.669804	-0.658543	-0.631371	-0.657189	-0.701422	-0.703962	-0.685311			0.0125727	-0.0137516	-0.0449667	0.0249985	0.0494023	0.0279319	-0.0190694	0.0195708	0.0142457	0.0567267	-0.0168122	-0.0412613	0.0408925	0.0673063	0.00362177	-0.0264954
LUXS23	-0.59243	-0.545548	-0.521702	-0.470401	-0.452911	-0.543586	-0.554745	-0.610648	-0.593511	-0.579649	-0.592576	-0.664662	-0.64316	-0.696017	-0.729978	-0.70938	-0.648102			-0.0791356	-0.0437099	-0.0983345	-0.0371806	0.200204	0.0205296	0.100772	-0.0280634	-0.0233571	0.0223017	0.121648	-0.0323502	0.0821843	0.0487926	-0.0282176	-0.0863813
LUXS24	-0.450983	-0.466282	-0.423403	-0.414804	-0.437542	-0.440306	-0.282558	-0.351531	-0.368347	-0.326253	-0.323819	-0.392352	-0.514865	-0.573677	-0.61669	-0.614239	-0.578976			0.0339227	-0.0919584	-0.02031	0.0548152	0.0063183	-0.35827	0.244103	0.0478371	-0.114278	-0.00745993	0.21164	0.312251	0.114228	0.0749778	-0.0039751	-0.0574091
LUXS25	-0.212344	-0.266272	-0.237679	-0.321527	-0.341141	-0.332752	-0.325571	-0.367486	-0.370953	-0.331098	-0.338041	-0.358549	-0.363156	-0.317936	-0.303183	-0.279633	-0.258374			0.253963	-0.107384	0.35278	0.0610027	-0.0245907	-0.0215813	0.128745	0.00943393	-0.107439	0.0209703	0.0606657	0.0128497	-0.124519	-0.0464022	-0.077678	-0.0760232
LUXS26	-0.542784	-0.54591	-0.539614	-0.538018	-0.530727	-0.556932	-0.590185	-0.633654	-0.637397	-0.616986	-0.65015	-0.648339	-0.629422	-0.708733	-0.756675	-0.743769	-0.708867			0.00575904	-0.0115337	-0.0029572	-0.013552	0.0493759	0.0597078	0.0736526	0.00590766	-0.0320234	0.0537526	-0.00278522	-0.0291783	0.126007	0.0676438	-0.0170562	-0.0469258
LUXS27	-0.66981	-0.66916	-0.684198	-0.725803	-0.644774	-0.650956	-0.674968	-0.787489	-0.784385	-0.78735	-0.800608	-0.795364	-0.73246	-0.7573	-0.794009	-0.766352	-0.739389			-0.000969955	0.0224728	0.0608079	-0.11164	0.00958795	0.0368863	0.166706	-0.00394141	0.00378015	0.0168386	-0.00654974	-0.0790887	0.0339129	0.0484738	-0.0348324	-0.0351827
LUXS28	-0.895122	-0.89135	-0.881777	-0.867244	-0.866068	-0.875482	-0.903071	-0.900071	-0.90191	-0.901164	-0.894707	-0.929463	-0.871224	-0.904747	-0.924692	-0.909376	-0.892694			-0.00421389	-0.0107397	-0.0164817	-0.00135579	0.0108696	0.0315132	-0.00332241	0.00204331	-0.000826911	-0.0071651	0.0388465	-0.0626587	0.0384778	0.0220452	-0.0165636	-0.0183441
LUXS29	-0.590561	-0.624792	-0.639371	-0.618383	-0.628014	-0.662083	-0.68749	-0.690426	-0.69068	-0.68295	-0.701471	-0.750699	-0.658655	-0.734722	-0.773429	-0.746914	-0.715271			0.0579624	0.0233343	-0.0328256	0.0155744	0.0542486	0.0383749	0.00427054	0.000367897	-0.0111927	0.0271203	0.0701781	-0.122612	0.11549	0.052682	-0.0342821	-0.0423649
LUXS30	-0.787527	-0.767568	-0.761488	-0.742478	-0.745792	-0.760724	-0.806921	-0.792155	-0.797046	-0.791038	-0.791314	-0.827407	-0.684084	-0.754111	-0.78997	-0.751042	-0.696579			-0.0253432	-0.00792099	-0.0249647	0.0044631	0.0200217	0.0607283	-0.0182999	0.00617483	-0.00753823	0.000349099	0.0456111	-0.173219	0.102365	0.0475514	-0.0492775	-0.0725166
LUXS31	-0.379895	-0.379742	-0.393222	-0.351392	-0.342921	-0.385357	-0.40544	-0.412085	-0.379723	-0.391309	-0.434859	-0.433589	-0.446997	-0.483061	-0.562159	-0.540947	-0.514706			-0.00040212	0.0354977	-0.106377	-0.0241062	0.123747	0.0521145	0.0163918	-0.0785328	0.0305121	0.111292	-0.00291989	0.0309238	0.080679	0.163743	-0.0377331	-0.0485095
LUXS32	-0.609287	-0.618378	-0.597572	-0.588624	-0.601303	-0.620606	-0.626749	-0.656766	-0.628652	-0.643141	-0.676157	-0.68447	-0.669203	-0.710266	-0.750991	-0.730013	-0.70356			0.0149211	-0.0336459	-0.0149744	0.0215394	0.0321026	0.0098991	0.0478926	-0.0428072	0.0230476	0.0513358	0.0122953	-0.022306	0.0613624	0.0573373	-0.0279335	-0.036237
LUXS33	-0.221408	-0.229657	-0.241311	-0.214159	-0.219112	-0.248945	-0.237767	-0.23936	-0.231105	-0.206472	-0.236972	-0.299642	-0.318694	-0.362956	-0.388516	-0.366021	-0.354139			0.0372578	0.050745	-0.112516	0.0231248	0.136155	-0.0448994	0.00669643	-0.0344883	-0.106587	0.14772	0.26446	0.0635831	0.138887	0.0704219	-0.057901	-0.0324619
LUXS34	-0.492644	-0.555461	-0.511139	-0.516845	-0.562436	-0.537274	-0.541096	-0.609943	-0.613255	-0.587164	-0.612712	-0.68514	-0.640251	-0.694632	-0.734223	-0.714916	-0.695222			0.12751	-0.0797935	0.0111646	0.0882091	-0.044737	0.0071138	0.127236	0.00542928	-0.0425451	0.0435117	0.118209	-0.0655179	0.0849357	0.0569956	-0.0262955	-0.0275468
LUXS35	-0.0884472	-0.0900197	-0.0895698	-0.0902628	-0.091147	-0.0905581	-0.0917368	-0.0888555	-0.0885093	-0.0873672	-0.088011	-0.0899378	-0.089775	-0.091395	-0.0918351	-0.0913899	-0.0907858			0.0177788	-0.004998	0.00773739	0.00979558	-0.00646084	0.0130157	-0.0314078	-0.00389624	-0.0129041	0.00736952	0.0218926	-0.00181056	0.0180448	0.00481571	-0.00484792	-0.00661018
LVAS1	-0.206147	0.0795013	0.00122602	-0.327278	-0.328335	-0.515975	-0.411234	-0.292164	-0.450544	-0.560372	-0.467224	-0.779654	-0.881711	-0.803048	-0.847279	-0.836393	-0.844256			-1.38565	-0.984579	-267.944	0.0032279	0.57149	-0.202996	-0.289544	0.542095	0.243765	-0.166225	0.668696	0.1309	-0.0892167	0.0550787	-0.0128473	0.00940038
LVAS2	0.0308284	0.0798259	0.25074	0.179896	-0.00985733	0.0915047	0.150637	-0.447762	-0.581384	-0.660713	-0.671733	-0.343974	-0.333946	-0.369286	-0.411159	-0.384174	-0.339481			1.58936	2.14108	-0.28254	-1.05479	-10.2829	0.646224	-3.97245	0.298423	0.136449	0.0166781	-0.487931	-0.029151	0.105824	0.11339	-0.0656322	-0.116334
LVAS3	0.078465	0.0639727	0.00677376	0.0171934	0.0274078	0.0242522	0.0633547	-0.181566	-0.546172	-0.525032	-0.360358	-0.237417	-0.179867	-0.437567	-0.387175	-0.388729	-0.12221			-0.184698	-0.894115	1.53824	0.594087	-0.115136	1.61233	-3.86586	2.00812	-0.0387069	-0.313644	-0.341164	-0.2424	1.43272	-0.115165	0.00401434	-0.685616
LVAS4	-0.435834	-0.39378	-0.33739	-0.331154	-0.374755	-0.405964	-0.361289	-0.330547	-0.379161	-0.416603	-0.369156	-0.224109	-0.211504	-0.19714	-0.217621	-0.176636	-0.268311			-0.0964915	-0.143202	-0.0184813	0.131663	0.0832791	-0.110047	-0.0850908	0.147074	0.0987485	-0.113891	-0.392916	-0.0562454	-0.0679103	0.10389	-0.188333	0.519008
LVAS5	-0.0291248	-0.054282	-0.0791396	-0.0557913	-0.0346951	-0.0463409	-0.0352113	-0.0356258	-0.0340684	-0.0383004	-0.0321386	-0.0446364	-0.0900155	-0.0981604	-0.0812523	-0.088967	-0.0598833			0.863777	0.457934	-0.295026	-0.378128	0.335662	-0.240168	0.0117702	-0.0437145	0.12422	-0.16088	0.38887	1.01664	0.0904829	-0.172249	0.0949469	-0.326904
LVAS6	-0.469585	-0.0940327	0.160688	-0.473064	-0.433149	-0.428422	-0.341171	-0.525583	-0.624793	-0.632028	-0.637067	-0.831476	-0.848564	-0.875362	-0.862296	-0.829119	-0.815406			-0.799753	-2.70885	-3.94399	-0.0843758	-0.0109132	-0.203656	0.540526	0.188762	0.0115791	0.00797365	0.305161	0.0205525	0.0315799	-0.014926	-0.0384762	-0.0165387
LVAS7	0.00857209	0.0381344	-0.0682046	-0.0579025	-0.0142169	-0.00675887	0.0306472	-0.0685023	-0.118121	-0.355742	-0.236695	-0.358185	-0.159971	-0.386378	-0.384497	-0.442619	-0.371929			3.44867	-2.78853	-0.151047	-0.754469	-0.524588	-5.53436	-3.23519	0.724342	2.01166	-0.334644	0.513274	-0.553385	1.4153	-0.00486727	0.151163	-0.159707
LVAS8	-0.093277	-0.0416383	-0.170973	-0.152058	-0.140303	-0.123488	-0.100571	-0.131126	-0.0685119	-0.0442971	-0.131929	-0.110613	-0.0665036	-0.0428975	-0.0518839	-0.0661281	-0.0473463			-0.553606	3.10614	-0.110629	-0.0773061	-0.119848	-0.185581	0.303813	-0.47751	-0.353438	1.97827	-0.161573	-0.398772	-0.35496	0.209486	0.27454	-0.284022
LVAS9	-0.213603	-0.320824	-0.296083	-0.420824	-0.382891	-0.286688	-0.248834	-0.314948	-0.371628	-0.342376	-0.328274	-0.441692	-0.465871	-0.531358	-0.565837	-0.539966	-0.49247			0.501966	-0.0771161	0.421301	-0.0901387	-0.251254	-0.132039	0.265694	0.179966	-0.0787126	-0.0411877	0.345498	0.0547413	0.140569	0.0648877	-0.0457221	-0.0879601
LVAS10	-0.0219981	-0.0229453	-0.0811737	-0.276958	-0.294687	-0.31397	-0.291153	-0.301853	-0.348043	-0.26055	-0.279374	-0.365061	-0.35237	-0.334887	-0.362576	-0.39703	-0.288905			0.0430583	2.5377	2.41191	0.0640146	0.0654347	-0.072673	0.0367528	0.15302	-0.251386	0.072248	0.306713	-0.0347656	-0.0496132	0.0826806	0.0950262	-0.272336
LVAS11	0.23927	0.291572	0.151669	0.125684	0.217291	0.201558	0.194326	0.0718729	0.042054	-0.00704842	-0.166709	-0.315344	-0.17663	-0.450937	-0.639831	-0.574378	-0.0649567			0.218587	-0.479822	-0.171325	0.728865	-0.0724069	-0.0358832	-0.630142	-0.414884	-1.1676	22.6519	0.891589	-0.439883	1.55301	0.418893	-0.102297	-0.886909
LVAS12	-0.196915	-0.15795	-0.413414	-0.39251	-0.457651	-0.46184	0.092161	0.0964826	0.0251169	-0.297615	-0.389159	-0.446137	-0.218207	-0.573362	-0.270079	-0.136195	-0.0770196			-0.197878	1.61738	-0.0505643	0.165959	0.00915399	-1.19955	0.0468913	-0.739675	-12.8492	0.307589	0.146415	-0.510898	1.62761	-0.528954	-0.495722	-0.434491
LVAS13	-0.218797	-0.0900741	-0.0800373	-0.253517	-0.252858	-0.318177	-0.318893	-0.276058	-0.332689	-0.37851	-0.349725	-0.461766	-0.493989	-0.442899	-0.435117	-0.425528	-0.433006			-0.588321	-0.111428	2.16748	-0.00260013	0.258324	0.00225077	-0.134324	0.205143	0.13773	-0.0760481	0.320368	0.0697832	-0.103425	-0.0175705	-0.0220365	0.0175722
LVAS14	-0.260062	-0.353871	-0.222886	-0.289114	-0.329322	-0.356338	-0.273066	-0.354915	-0.361198	-0.352867	-0.365595	-0.298073	-0.326444	-0.33568	-0.469711	-0.508038	-0.380489			0.360718	-0.37015	0.297136	0.139075	0.0820345	-0.233687	0.299739	0.0177045	-0.0230652	0.03607	-0.184691	0.0951813	0.028292	0.399283	0.0815966	-0.251061
LVAS15	-0.286569	-0.337146	-0.274803	-0.154356	-0.157003	-0.150123	-0.231242	-0.238494	-0.213317	-0.202583	-0.217702	-0.605229	-0.660218	-0.444191	-0.318626	-0.348429	-0.317502			0.176489	-0.184915	-0.438304	0.0171514	-0.0438234	0.540354	0.0313632	-0.105567	-0.0503184	0.0746305	1.78007	0.0908574	-0.327206	-0.282682	0.0935365	-0.0887622
LVAS16	-0.0627277	-0.0858336	-0.106485	-0.101055	-0.08525	-0.0744483	-0.185188	-0.187738	-0.191271	-0.231236	-0.245479	-0.258045	-0.303002	-0.448353	-0.453522	-0.455917	-0.376147			0.368354	0.240603	-0.0509979	-0.156399	-0.126706	1.48747	0.0137681	0.0188217	0.208942	0.0615956	0.0511887	0.174223	0.479703	0.0115283	0.00528104	-0.174965
LVAS17	0.0460868	0.135027	0.233374	0.158599	0.0890522	0.0749641	0.132696	0.0146353	-0.0793027	-0.101296	-0.189251	-0.505663	-0.473471	-0.515578	-0.590748	-0.5295	-0.464184			1.92984	0.728353	-0.32041	-0.438505	-0.158201	0.770123	-0.889708	-6.41859	0.27734	0.86829	1.67191	-0.0636628	0.0889326	0.145797	-0.103678	-0.123355
LVAS18	0.355946	0.389937	0.325808	0.270108	0.340815	0.312714	0.312387	0.181569	0.163288	0.118828	-0.133267	-0.141256	-0.111283	-0.0932121	-0.183197	-0.0618328	0.0342595			0.0954969	-0.164462	-0.170958	0.261773	-0.0824523	-0.00104723	-0.418768	-0.100681	-0.272283	-2.12151	0.0599486	-0.212189	-0.162385	0.965373	-0.662478	-1.55407
LVAS19	-0.0371981	-0.0820676	-0.0195285	-0.181212	-0.123262	-0.0980966	-0.00991779	-0.148852	-0.219153	-0.389254	-0.251227	-0.331864	-0.167736	-0.220198	-0.21607	-0.193238	-0.163863			1.20623	-0.762044	8.27936	-0.31979	-0.204163	-0.898898	14.0086	0.472291	0.776172	-0.354593	0.320972	-0.494565	0.312769	-0.0187493	-0.105666	-0.152018
LVAS20	-0.0665439	0.107886	-0.173039	-0.0992044	-0.0482833	0.0698243	0.149097	-0.0676041	-0.194101	-0.247277	-0.320236	-0.601618	-0.596999	-0.653615	-0.674874	-0.613486	-0.535105			-2.62127	-2.60391	-0.426693	-0.513295	-2.44614	1.13532	-1.45342	1.87114	0.27396	0.295051	0.878668	-0.00767747	0.0948354	0.0325256	-0.0909633	-0.127763
LVAS21	0.224864	0.260887	0.249017	0.191036	0.113483	0.0246239	0.0696684	0.132426	0.0445933	-0.0828308	-0.0671629	-0.0947485	-0.33571	-0.206629	-0.282489	-0.251593	-0.0956046			0.160196	-0.0454963	-0.23284	-0.405961	-0.783016	1.8293	0.900809	-0.66326	-2.85747	-0.189155	0.410726	2.54317	-0.384501	0.367132	-0.109373	-0.620002
LVAS22	0.000129466	0.0202071	-0.0358225	-0.0273197	0.039805	0.0823405	0.124203	0.0110619	-0.0480857	-0.139183	-0.100675	-0.317465	-0.231106	-0.214478	-0.244166	-0.211295	-0.150154			155.08	-2.77277	-0.237361	-2.45701	1.0686	0.508411	-0.910938	-5.34698	1.89447	-0.276672	2.15337	-0.272028	-0.0719469	0.138419	-0.134624	-0.289365
LVAS23	-0.117418	-0.276977	0.0140541	-0.110113	0.0742543	0.120193	0.18238	-0.120171	-0.280824	-0.528831	-0.25416	-0.50039	-0.255243	-0.401865	-0.474996	-0.383713	-0.296626			1.35889	-1.05074	-8.83494	-1.67435	0.618672	0.517388	-1.6589	1.33687	0.883145	-0.519394	0.9688	-0.489911	0.574437	0.18198	-0.192177	-0.226958
LVAS24	-0.635906	-0.668367	-0.634168	-0.417661	-0.330086	-0.34548	-0.345961	-0.365314	-0.313118	-0.336228	-0.346092	-0.294412	-0.194216	-0.1505	-0.17074	-0.183279	-0.0967864			0.0510462	-0.0511678	-0.341404	-0.209678	0.046635	0.00139121	0.0559416	-0.14288	0.0738069	0.0293371	-0.149324	-0.340328	-0.225088	0.134483	0.0734406	-0.471918
LVAS25	-0.0458794	-0.030206	-0.0562027	-0.0497347	-0.00255065	0.0302927	0.0611886	-0.0464808	-0.114764	-0.321926	-0.117372	-0.272653	-0.226658	-0.169448	-0.16834	-0.19545	-0.173598			-0.341621	0.860643	-0.115083	-0.948715	-12.8765	1.01991	-1.75963	1.46906	1.80511	-0.635405	1.32297	-0.168694	-0.252406	-0.00653714	0.161042	-0.111805
LVAS26	-0.190027	-0.341787	0.165936	0.147458	0.157457	0.222222	0.24544	-0.00592082	-0.0691933	-0.297578	-0.278851	-0.614712	-0.337372	-0.541842	-0.472886	-0.37615	-0.285057			0.798623	-1.4855	-0.11136	0.0678113	0.411319	0.104479	-1.02412	10.6864	3.30067	-0.0629296	1.20444	-0.451171	0.606068	-0.127261	-0.204566	-0.242171
LVAS27	0.0510036	0.0824379	0.0493519	0.0421139	0.102365	0.114886	0.139346	0.0228585	-0.0588465	-0.136008	-0.123395	-0.312508	-0.233202	-0.21119	-0.247364	-0.209502	-0.143566			0.616315	-0.401345	-0.146661	1.43068	0.122318	0.212901	-0.835959	-3.57438	1.31124	-0.0927388	1.53258	-0.253773	-0.0943892	0.171287	-0.153062	-0.314726
LVAS28	0.191346	0.258404	0.0877567	0.0537887	0.161533	0.126646	0.164182	0.0936921	0.0208385	0.0140737	-0.0476313	-0.260647	-0.370722	-0.27284	-0.398583	-0.359992	-0.216852			0.350452	-0.66039	-0.38707	2.0031	-0.215976	0.296389	-0.42934	-0.777585	-0.324633	-4.38443	4.47217	0.422319	-0.264031	0.460867	-0.096821	-0.397621
LVAS29	0.260146	0.299404	0.200715	0.141354	0.227619	0.253077	0.304831	0.162293	0.0895553	0.0339243	-0.00635116	-0.276076	-0.246206	-0.180876	-0.286368	-0.21155	-0.0843409			0.150906	-0.329619	-0.295748	0.61028	0.111843	0.204501	-0.467599	-0.448186	-0.621192	-1.18722	42.4687	-0.108195	-0.265348	0.583227	-0.261264	-0.60132
LVAS30	0.408194	0.453872	0.363094	0.339893	0.420001	0.443756	0.476402	0.359562	0.244721	0.164732	0.266685	-0.3255	-0.0834513	0.00917498	-0.16561	-0.0495419	0.136919			0.111902	-0.200008	-0.0638973	0.235685	0.0565598	0.0735677	-0.245255	-0.319392	-0.326859	0.618905	-2.22054	-0.743621	-1.10994	-19.0501	-0.700851	-3.76369
LVAS31	-0.0299609	-0.139138	-0.0810711	-0.075155	-0.142132	-0.160992	-0.00655154	-0.0444914	-0.0688354	-0.0929441	-0.15779	-0.296127	-0.209143	-0.165649	-0.159459	-0.141525	-0.117342			3.64396	-0.417331	-0.0729738	0.891191	0.132688	-0.959305	5.79098	0.54716	0.350237	0.697691	0.876714	-0.293739	-0.207965	-0.0373654	-0.11247	-0.170872
LVAS32	-0.0602556	-0.0750152	-0.0948705	-0.0938181	-0.0598391	-0.0487207	-0.02439	-0.0843041	-0.121383	-0.132737	-0.112552	-0.238596	-0.194763	-0.192529	-0.196501	-0.19062	-0.168381			0.24495	0.264683	-0.0110933	-0.36218	-0.185805	-0.499391	2.4565	0.43982	0.093541	-0.152066	1.11986	-0.183708	-0.0114744	0.0206346	-0.029931	-0.116666
LVAS33	-0.101116	-0.113443	-0.162979	-0.14956	-0.13476	-0.118412	-0.0986374	-0.137509	-0.165374	-0.17427	-0.183114	-0.293445	-0.263484	-0.288498	-0.296407	-0.278194	-0.23645			0.121904	0.436664	-0.0823383	-0.0989552	-0.12131	-0.167001	0.394087	0.20264	0.0537927	0.050752	0.602523	-0.102102	0.0949349	0.0274145	-0.0614464	-0.150052
LVAS34	-0.181396	-0.110148	-0.164448	-0.154127	-0.300208	-0.302522	0.093319	-0.00840574	-0.078953	-0.155955	-0.244685	-0.632836	-0.228958	-0.222029	-0.231145	-0.210494	-0.173244			-0.39278	0.492981	-0.0627662	0.947806	0.00770591	-1.30847	-1.09008	8.39274	0.975296	0.568944	1.58632	-0.638203	-0.0302656	0.0410578	-0.0893412	-0.176965
LVAS35	-0.0285714	-0.0285714	-0.0285714	-0.0285714	-0.0285714	-0.0285714	-0.0285714	-0.0285714	-0.0285714	-0.0285714	-0.0285714	-0.0285714	-0.0285714	-0.0285714	-0.0285717	-0.0285715	-0.0285714			1.07531e-09	-1.89773e-09	3.66081e-07	-2.53496e-07	-1.08896e-07	2.07718e-08	-1.80628e-08	6.0712e-09	-1.02252e-08	-8.17857e-10	8.27159e-08	1.2758e-07	2.14049e-07	8.42393e-06	-6.3021e-06	-2.54621e-06
MEXS1	0.510235	0.586113	0.489745	0.398188	0.215214	0.318658	0.475362	0.364085	0.304635	0.399624	0.554021	0.105588	0.381798	0.293731	0.457499	0.469422	0.26034			0.14871	-0.164418	-0.18695	-0.459515	0.480654	0.491762	-0.23409	-0.163285	0.311813	0.386355	-0.809415	2.61591	-0.230663	0.557545	0.0260619	-0.445404
MEXS2	-0.65094	-0.653676	-0.687766	-0.697903	-0.726644	-0.724986	-0.698764	-0.67947	-0.683039	-0.633602	-0.566983	-0.6894	-0.619136	-0.669468	-0.645102	-0.689492	-0.710216			0.00420356	0.052151	0.0147386	0.0411831	-0.00228233	-0.0361682	-0.0276119	0.00525159	-0.0723774	-0.105143	0.215909	-0.101921	0.0812949	-0.0363965	0.0688107	0.0300564
MEXS3	0.156834	0.256561	0.158768	0.0356998	-0.128411	-0.0557618	0.158064	0.0138463	0.0195367	0.144599	0.319165	-0.150693	0.0934348	-0.0366597	0.232676	0.153679	0.0796343			0.635882	-0.38117	-0.775145	-4.59697	-0.565756	-3.83463	-0.912401	0.41097	6.40136	1.20725	-1.47215	-1.62003	-1.39236	-7.34693	-0.339517	-0.481813
MEXS4	-0.345565	-0.331323	-0.301666	-0.303379	-0.318592	-0.349343	-0.367299	-0.362724	-0.412757	-0.40094	-0.346792	-0.352067	-0.357415	-0.208694	-0.16163	-0.174832	-0.167777			-0.0412141	-0.0895104	0.0056793	0.0501449	0.0965228	0.0513995	-0.0124563	0.137936	-0.0286298	-0.135052	0.0152099	0.015192	-0.416101	-0.22552	0.0816854	-0.0403532
MEXS5	-0.233986	-0.219285	-0.279517	-0.291665	-0.215168	-0.236633	-0.252978	-0.254425	-0.312027	-0.293733	-0.25531	-0.246317	-0.270579	-0.262388	-0.216227	-0.226787	-0.240797			-0.0628254	0.274673	0.0434615	-0.262279	0.0997582	0.0690747	0.00571836	0.226405	-0.0586301	-0.130809	-0.0352264	0.0985009	-0.0302737	-0.175924	0.0488371	0.0617722
MEXS6	-0.246001	-0.219532	-0.224017	-0.236909	-0.211219	-0.220569	-0.230639	-0.239508	-0.283392	-0.266201	-0.291375	-0.249832	-0.263567	-0.306529	-0.388818	-0.303612	-0.331561			-0.107597	0.0204311	0.0575449	-0.108438	0.0442662	0.0456579	0.0384507	0.183227	-0.0606615	0.0945673	-0.142575	0.0549762	0.163003	0.268453	-0.21914	0.0920531
MEXS7	-0.0518914	-0.0816795	-0.0731179	-0.0925305	-0.114182	-0.118824	-0.134128	-0.116325	-0.10485	-0.127317	-0.13855	-0.136188	-0.128442	-0.148621	-0.0893463	-0.23169	-0.228222			0.574047	-0.10482	0.265497	0.233991	0.0406564	0.128794	-0.132727	-0.0986454	0.214269	0.0882312	-0.0170471	-0.0568772	0.157106	-0.398832	1.59316	-0.0149688
MEXS8	0.151581	0.271177	0.0351999	0.121498	0.160401	0.0596902	-0.0467129	-0.101613	-0.396884	-0.376572	-0.210418	-0.242246	-0.273827	-0.426138	-0.312632	-0.372357	-0.433706			0.788992	-0.870196	2.45165	0.320198	-0.627868	-1.78259	1.17527	2.90583	-0.0511791	-0.441226	0.151257	0.130368	0.556232	-0.266361	0.191039	0.164758
MEXS9	-0.151791	-0.160304	-0.127004	-0.224005	-0.32295	-0.341858	-0.279969	-0.32598	-0.407497	-0.385183	-0.245716	-0.31376	-0.35542	-0.407544	-0.323596	-0.376466	-0.370331			0.0560832	-0.207729	0.763762	0.441706	0.0585499	-0.181038	0.164344	0.250067	-0.0547595	-0.36208	0.276921	0.132776	0.146654	-0.205984	0.163381	-0.0162959
MEXS10	-0.5614	-0.532109	-0.517483	-0.544923	-0.536959	-0.568521	-0.578015	-0.589168	-0.626603	-0.613126	-0.610268	-0.585175	-0.612606	-0.647451	-0.607114	-0.619461	-0.624385			-0.052175	-0.0274871	0.0530263	-0.0146159	0.0587794	0.0166987	0.0192955	0.0635397	-0.0215091	-0.00465989	-0.041118	0.0468759	0.0568796	-0.0623003	0.0203365	0.00794842
MEXS11	-0.259579	-0.188035	-0.16904	-0.17509	-0.111876	-0.131427	-0.176122	-0.231288	-0.346297	-0.329436	-0.242485	-0.333526	-0.383623	-0.457957	-0.193144	-0.334747	-0.487422			-0.275617	-0.101018	0.0357896	-0.361034	0.174748	0.340078	0.313224	0.497258	-0.0486889	-0.26394	0.375451	0.150205	0.193767	-0.578248	0.733143	0.45609
MEXS12	-0.571729	-0.555819	-0.593923	-0.641246	-0.685608	-0.656058	-0.641519	-0.62698	-0.673586	-0.649123	-0.619841	-0.657176	-0.69593	-0.715997	-0.745582	-0.739718	-0.755679			-0.0278267	0.0685547	0.0796785	0.06918	-0.0430997	-0.0221622	-0.0226629	0.0743338	-0.0363176	-0.0451103	0.0602331	0.0589719	0.0288343	0.0413205	-0.00786568	0.0215768
MEXS13	-0.497178	-0.497585	-0.500031	-0.533163	-0.536087	-0.555697	-0.539978	-0.543617	-0.555967	-0.531251	-0.482448	-0.513228	-0.503725	-0.537705	-0.502032	-0.521603	-0.467629			0.000820533	0.00491503	0.0662588	0.00548515	0.0365805	-0.0282871	0.00673799	0.0227187	-0.0444553	-0.0918643	0.063799	-0.0185156	0.0674576	-0.0663434	0.0389832	-0.103476
MEXS14	-0.653426	-0.634463	-0.64226	-0.629777	-0.587909	-0.597179	-0.623741	-0.630298	-0.67445	-0.69876	-0.71132	-0.691226	-0.695713	-0.75493	-0.804688	-0.785357	-0.740543			-0.0290205	0.0122896	-0.0194368	-0.0664803	0.0157678	0.0444784	0.010513	0.0700498	0.0360438	0.0179744	-0.0282488	0.00649089	0.0851175	0.0659103	-0.0240226	-0.0570621
MEXS15	-0.775698	-0.745001	-0.757113	-0.75965	-0.743782	-0.768139	-0.774252	-0.77845	-0.811002	-0.800372	-0.804177	-0.765004	-0.780183	-0.837297	-0.790683	-0.811207	-0.82835			-0.0395737	0.016258	0.00334993	-0.0208885	0.0327487	0.00795727	0.00542205	0.0418172	-0.0131071	0.00475312	-0.0487112	0.0198416	0.0732058	-0.0556723	0.0259579	0.0211318
MEXS16	-0.464086	-0.441293	-0.447838	-0.444519	-0.409227	-0.419796	-0.433546	-0.440072	-0.490694	-0.492712	-0.596215	-0.539019	-0.571559	-0.646888	-0.645798	-0.497486	-0.606423			-0.0491142	0.0148322	-0.00741169	-0.0793923	0.0258262	0.032753	0.0150539	0.115031	0.00411214	0.210068	-0.0959315	0.0603693	0.131794	-0.00168465	-0.229657	0.218974
MEXS17	0.011324	-0.0266319	0.0105406	-0.0253557	-0.0610792	-0.070236	-0.0967827	-0.067003	-0.0555622	-0.0841073	-0.10104	-0.145844	-0.157159	-0.266969	-0.210401	-0.276671	-0.201745			-3.35182	-1.39579	-3.40553	1.40889	0.149916	0.377965	-0.307697	-0.170751	0.513751	0.201328	0.443427	0.0775766	0.698725	-0.211891	0.314973	-0.270813
MEXS18	-0.166966	-0.171165	-0.176457	-0.194744	-0.19834	-0.198408	-0.221209	-0.202029	-0.170568	-0.169767	-0.154256	-0.231145	-0.21562	-0.227389	-0.345874	-0.424648	-0.399313			0.0251517	0.0309128	0.103634	0.0184651	0.000347431	0.114919	-0.0867056	-0.155726	-0.00469559	-0.0913651	0.498448	-0.0671654	0.0545829	0.521066	0.227751	-0.0596598
MEXS19	-0.271011	-0.24262	-0.200766	-0.257408	-0.270804	-0.308284	-0.330171	-0.353828	-0.425339	-0.264961	-0.247316	-0.249129	-0.279022	-0.317474	-0.259553	-0.283164	-0.321126			-0.10476	-0.172509	0.282131	0.0520414	0.138403	0.0709941	0.0716528	0.202106	-0.37706	-0.0665943	0.00733205	0.119988	0.137813	-0.182445	0.0909664	0.134065
MEXS20	-0.398758	-0.340603	-0.316139	-0.389204	-0.403861	-0.476933	-0.481396	-0.50275	-0.535787	-0.566611	-0.581436	-0.544327	-0.554923	-0.619107	-0.505422	-0.547335	-0.545917			-0.14584	-0.0718255	0.231114	0.0376598	0.180934	0.00935745	0.0443579	0.0657138	0.0575287	0.0261642	-0.0638215	0.0194658	0.115662	-0.183627	0.0829262	-0.00258967
MEXS21	-0.404006	-0.347804	-0.322554	-0.39626	-0.41296	-0.482418	-0.492316	-0.512484	-0.550097	-0.568097	-0.582978	-0.546394	-0.553227	-0.617729	-0.495273	-0.536501	-0.529801			-0.139112	-0.0725988	0.228509	0.0421446	0.168195	0.0205175	0.0409661	0.0733943	0.0327211	0.0261948	-0.0627551	0.0125059	0.116593	-0.198236	0.0832429	-0.0124867
MEXS22	0.0384752	0.0150484	0.045963	0.0289356	0.00380366	-0.00325239	-0.0135609	0.00343294	-0.127373	-0.0888506	0.0171685	0.0123983	-0.00103275	0.0197382	-0.0113242	-0.0237792	-0.0194551			-0.608881	2.05435	-0.370458	-0.868548	-1.85507	3.16952	-1.25315	-38.103	-0.302436	-1.19323	-0.277846	-1.0833	-20.1123	-1.57372	1.09986	-0.181844
MEXS23	-0.38909	-0.338561	-0.337036	-0.411012	-0.428062	-0.471735	-0.492432	-0.509625	-0.581593	-0.575579	-0.569739	-0.568878	-0.59595	-0.640167	-0.565087	-0.601234	-0.622809			-0.129865	-0.00450314	0.219489	0.041483	0.102026	0.0438738	0.034915	0.141217	-0.0103405	-0.010147	-0.00151036	0.0475883	0.0741955	-0.117282	0.0639679	0.0358843
MEXS24	-0.0978556	-0.089276	-0.0742934	-0.0805665	-0.0863027	-0.104725	-0.108487	-0.117262	-0.138736	-0.1317	-0.111336	-0.125602	-0.142414	-0.16114	-0.130606	-0.138416	-0.14431			-0.0876764	-0.167823	0.0844359	0.0711987	0.213458	0.035926	0.0808825	0.183131	-0.0507153	-0.154621	0.12813	0.133849	0.131497	-0.189492	0.0597969	0.0425879
MEXS25	-0.139831	-0.21364	-0.247063	-0.17776	-0.0833979	-0.121326	-0.170323	-0.220202	-0.301963	-0.275021	-0.193958	-0.206202	-0.27252	-0.219269	-0.122409	-0.167437	-0.173838			0.527845	0.156445	-0.280505	-0.530841	0.454787	0.40384	0.292855	0.371299	-0.0892229	-0.294751	0.0631262	0.321613	-0.195402	-0.441741	0.367854	0.0382276
MEXS26	-0.23343	-0.199633	-0.20179	-0.261937	-0.27434	-0.301655	-0.325111	-0.334716	-0.399024	-0.349498	-0.308724	-0.330836	-0.323965	-0.380998	-0.309936	-0.324394	-0.354308			-0.144783	0.0108068	0.298064	0.0473539	0.0995644	0.0777577	0.0295452	0.192126	-0.124118	-0.116666	0.0716267	-0.0207692	0.176045	-0.186513	0.046647	0.0922132
MEXS27	0.0707763	0.044825	0.0786106	0.0499097	0.0306928	0.0254156	-0.00527649	0.00726127	0.0132976	0.00093362	-0.00301635	-0.0278248	-0.0229939	0.00804657	0.046788	0.0192404	-0.0192167			-0.366667	0.753724	-0.365103	-0.385033	-0.171937	-1.20761	-2.37616	0.831308	-0.92979	-4.23081	8.22466	-0.173618	-1.34994	4.81465	-0.588774	-1.99876
MEXS28	0.0258484	-0.000540828	0.0182694	-0.0135366	-0.0486681	-0.0559893	-0.0769003	-0.0484542	-0.0221578	-0.0611179	-0.0816458	-0.0840473	-0.0774785	-0.0743129	-0.0307737	-0.0796878	-0.0863289			-1.02092	-34.7805	-1.74094	2.59529	0.150432	0.373483	-0.369909	-0.542706	1.7583	0.335873	0.029414	-0.0781566	-0.0408577	-0.58589	1.58948	0.0833379
MEXS29																				#DIV/0!	#DIV/0!	#DIV/0!	#DIV/0!	#DIV/0!	#DIV/0!	#DIV/0!	#DIV/0!	#DIV/0!	#DIV/0!	#DIV/0!	#DIV/0!	#DIV/0!	#DIV/0!	#DIV/0!	#DIV/0!
MEXS30	0.152718	0.0875242	0.0915966	0.0334755	-0.0262687	-0.0271413	-0.0714739	-0.00773009	0.0346915	-0.0561837	-0.147107	-0.121011	-0.100825	-0.147664	0.0265365	-0.148433	-0.140198			-0.42689	0.0465291	-0.634534	-1.78472	0.0332179	1.6334	-0.891847	-5.48786	-2.61952	1.61832	-0.177392	-0.166812	0.46456	-1.17971	-6.59354	-0.0554807
MEXS31	-0.0632552	-0.0635394	-0.0638159	-0.0646305	-0.0644332	-0.0675192	-0.0681738	-0.0682928	-0.0802628	-0.0666834	-0.062006	-0.0599328	-0.0600647	-0.0621197	-0.0581882	-0.0547685	-0.0550807			0.00449389	0.00435138	0.0127642	-0.00305299	0.0478948	0.00969556	0.00174574	0.175273	-0.169187	-0.0701435	-0.0334354	0.00220181	0.0342129	-0.0632887	-0.058771	0.00570038
MEXS32	-0.109891	-0.104036	-0.119517	-0.120808	-0.109758	-0.119283	-0.133051	-0.136091	-0.23195	-0.143483	-0.0955554	-0.0853274	-0.0899355	-0.1043	-0.0877113	-0.0962973	-0.110095			-0.0532753	0.148805	0.0107975	-0.0914672	0.0867864	0.11542	0.0228436	0.704384	-0.381406	-0.334031	-0.107038	0.0540047	0.159726	-0.159052	0.0978892	0.14328
MEXS33	-0.0571429	-0.0572378	-0.0571429	-0.0571429	-0.0572452	-0.0571448	-0.0572664	-0.0572761	-0.057266	-0.0574491	-0.0574876	-0.058264	-0.0580113	-0.0590419	-0.0574421	-0.0571738	-0.0572517			0.00166159	-0.0016586	-9.69109e-08	0.00179048	-0.00175313	0.00212722	0.00016997	-0.00017695	0.00319754	0.000669711	0.0135067	-0.00433826	0.0177668	-0.0270969	-0.00466989	0.00136185
MEXS34	-0.0421997	-0.0559923	-0.0434337	-0.0456108	-0.0622302	-0.0697339	-0.07239	-0.0565647	-0.0444887	-0.0498209	-0.0523647	-0.0578418	-0.0615853	-0.0614481	-0.0278327	-0.0335698	-0.0397298			0.326842	-0.224291	0.0501254	0.364374	0.120579	0.0380887	-0.218611	-0.213491	0.119856	0.0510592	0.104594	0.0647203	-0.00222787	-0.547054	0.206128	0.183498
MEXS35	-0.0571429	-0.0571429			-0.0571429	-0.0571429	-0.0572877	-0.057143	-0.0571429	-0.0571429	-0.0571429	-0.0571431	-0.0571436							6.30975e-07	-1	#DIV/0!	#DIV/0!	-6.01629e-07	0.00253513	-0.00252693	-1.7027e-06	7.85203e-07	-2.63132e-07	4.41823e-06	8.08764e-06	-1	#DIV/0!	#DIV/0!	#DIV/0!
MLTS1	0.153146	-0.378893	0.0158867	-0.119273	-0.101785	-0.204415	-0.206749	-0.231494	-0.29912	-0.295386	-0.287442	-0.447004	-0.471411	-0.298973	-0.414677	-0.457796	-0.477394			-3.47406	-1.04193	-8.5077	-0.146619	1.0083	0.0114172	0.119686	0.292128	-0.0124833	-0.0268916	0.555108	0.0546027	-0.365791	0.387003	0.103981	0.0428092
MLTS2	-0.182631	-0.202748	-0.334883	-0.399952	-0.234378	-0.253383	-0.316757	-0.339897	-0.313729	-0.331175	-0.323811	-0.307081	-0.312178	-0.370102	-0.385669	-0.462788	-0.347369			0.110151	0.651719	0.194302	-0.413985	0.0810896	0.250112	0.0730536	-0.0769885	0.0556071	-0.0222348	-0.0516666	0.0165977	0.185547	0.042061	0.199964	-0.249401
MLTS3	0.172038	-0.120028	-0.0112729	-0.14557	-0.0833473	-0.15927	-0.18899	-0.223981	-0.307933	-0.30102	-0.273889	-0.429635	-0.47755	-0.347417	-0.416565	-0.444616	-0.471508			-1.69768	-0.906081	11.9132	-0.427441	0.910924	0.1866	0.185147	0.374818	-0.0224493	-0.09013	0.568645	0.111524	-0.272501	0.199034	0.0673401	0.0604834
MLTS4	-0.36374	-0.360176	-0.299645	-0.276047	-0.289169	-0.264609	-0.194872	-0.228282	-0.220177	-0.196584	-0.192132	-0.407656	-0.347241	-0.322609	-0.387375	-0.325789	-0.36935			-0.00979601	-0.16806	-0.0787543	0.0475344	-0.0849316	-0.263548	0.171446	-0.0355018	-0.107155	-0.0226498	1.12175	-0.1482	-0.0709364	0.200756	-0.158984	0.133709
MLTS5	-0.0846488	-0.0761309	-0.0457369	-0.0476854	-0.084642	-0.0841649	-0.0695507	-0.0416744	-0.0514103	-0.0508692	-0.0453733	-0.0807332	-0.10373	-0.111659	-0.111779	-0.0886892	-0.0750473			-0.100626	-0.399234	0.0426025	0.77501	-0.00563612	-0.173639	-0.400805	0.233617	-0.0105253	-0.10804	0.779312	0.28485	0.0764382	0.0010743	-0.206566	-0.153817
MLTS6	-0.0576596	-0.0690597	-0.0935204	-0.0856095	-0.0782749	-0.0816055	-0.0888684	-0.095838	-0.11288	-0.106234	-0.0960555	-0.0708011	-0.0931338	-0.0941274	-0.101364	-0.0874756	-0.104403			0.197714	0.354196	-0.0845904	-0.0856745	0.0425495	0.0890003	0.0784264	0.177821	-0.0588738	-0.0958149	-0.262915	0.315428	0.0106685	0.0768864	-0.137019	0.193509
MLTS7	-0.588616	-0.610473	-0.667726	-0.606226	-0.579695	-0.653934	-0.688678	-0.643499	-0.664729	-0.648418	-0.677827	-0.547166	-0.519699	-0.580586	-0.610333	-0.588818	-0.608036			0.0371332	0.093784	-0.0921043	-0.0437641	0.128067	0.0531298	-0.0656025	0.0329912	-0.024537	0.045354	-0.192764	-0.0501993	0.117159	0.051236	-0.035252	0.0326389
MLTS8	-0.547316	-0.264659	-0.42353	-0.603404	-0.687867	-0.820275	-0.523706	-0.535724	-0.416587	-0.526183	-0.709925	-0.541921	-0.201645	-0.432849	-0.419526	-0.328651	-0.424301			-0.516443	0.600289	0.424701	0.139977	0.192491	-0.361549	0.0229492	-0.222385	0.26308	0.349198	-0.23665	-0.627908	1.1466	-0.0307803	-0.216614	0.291039
MLTS9	-0.476041	-0.365411	-0.312648	-0.38875	-0.350782	-0.360866	-0.41096	-0.434658	-0.151836	-0.15986	-0.150391	-0.287823	-0.190932	-0.292449	-0.404545	-0.340004	-0.342322			-0.232396	-0.144394	0.243412	-0.0976672	0.0287458	0.138817	0.0576647	-0.650678	0.0528518	-0.0592336	0.913826	-0.336634	0.531696	0.383299	-0.159539	0.00681786
MLTS10	-0.230223	-0.236328	-0.243486	-0.156976	-0.215411	-0.201226	-0.189976	-0.235285	-0.25775	-0.286183	-0.286033	-0.426568	-0.399057	-0.471489	-0.318189	-0.321243	-0.495328			0.0265146	0.0302895	-0.355299	0.372259	-0.0658494	-0.0559096	0.2385	0.0954774	0.110312	-0.00052114	0.491322	-0.0644929	0.181506	-0.325139	0.00959895	0.54191
MLTS11	-0.117629	-0.118644	-0.161511	-0.14485	-0.188547	-0.307856	-0.312837	-0.377762	-0.299961	-0.389259	-0.402443	-0.387546	-0.460569	-0.547935	-0.551169	-0.450926	-0.453788			0.00862957	0.361309	-0.103155	0.301665	0.632787	0.0161781	0.207537	-0.205953	0.297697	0.0338713	-0.0370164	0.188423	0.189692	0.00590148	-0.181872	0.00634713
MLTS12	-0.196652	-0.192014	-0.237403	-0.217745	-0.233882	-0.319853	-0.325535	-0.379502	-0.333186	-0.3927	-0.398354	-0.384094	-0.444444	-0.505512	-0.5042	-0.427346	-0.436691			-0.0235827	0.236383	-0.0828052	0.0741095	0.367583	0.0177663	0.165777	-0.122042	0.17862	0.0143974	-0.0357966	0.157123	0.137403	-0.00259518	-0.152428	0.0218667
MLTS13	-0.489171	-0.512525	-0.438434	-0.525852	-0.549328	-0.329103	-0.374839	-0.35629	-0.328762	-0.382533	-0.368399	-0.486153	-0.542332	-0.541481	-0.607173	-0.610323	-0.607074			0.0477421	-0.144561	0.199387	0.0446448	-0.4009	0.138973	-0.0494856	-0.0772626	0.163557	-0.0369486	0.319637	0.115556	-0.00156794	0.121318	0.00518884	-0.00532394
MLTS14	-0.701335	-0.696696	-0.72525	-0.679748	-0.679054	-0.686893	-0.716632	-0.675801	-0.645456	-0.6751	-0.664238	-0.673726	-0.642215	-0.512205	-0.619868	-0.621731	-0.515972			-0.00661434	0.0409849	-0.06274	-0.00102067	0.0115443	0.0432945	-0.0569756	-0.0449034	0.0459273	-0.0160891	0.0142833	-0.0467704	-0.20244	0.210194	0.00300622	-0.170105
MLTS15	-0.220958	-0.227394	-0.238308	-0.25745	-0.234868	-0.172953	-0.211378	-0.210438	-0.190638	-0.192589	-0.192273	-0.293932	-0.319531	-0.347984	-0.325476	-0.296033	-0.307016			0.0291276	0.0479952	0.0803233	-0.0877124	-0.263616	0.22217	-0.00444821	-0.0940874	0.0102299	-0.00164033	0.528723	0.0870929	0.0890468	-0.0646821	-0.0904615	0.0371024
MLTS16	-0.111345	-0.144929	-0.176056	-0.149732	-0.146689	-0.178925	-0.196464	-0.236303	-0.264524	-0.268904	-0.239021	-0.284273	-0.643676	-0.431542	-0.422804	-0.334933	-0.298727			0.301615	0.214776	-0.14952	-0.0203203	0.219754	0.0980226	0.202784	0.119427	0.0165571	-0.111129	0.189324	1.26428	-0.329566	-0.0202482	-0.20783	-0.1081
MLTS17	-0.13923	-0.0787947	-0.184274	-0.262607	-0.242014	-0.316438	-0.374625	-0.366016	-0.383112	-0.368519	-0.354795	-0.507026	-0.590767	-0.700503	-0.724835	-0.634172	-0.580832			-0.434069	1.33866	0.425092	-0.078419	0.30752	0.183883	-0.0229799	0.0467065	-0.0380892	-0.037243	0.429069	0.165161	0.185753	0.0347344	-0.12508	-0.084111
MLTS18	-0.285864	-0.273354	-0.329895	-0.312513	-0.310321	-0.433778	-0.443906	-0.51614	-0.449905	-0.529691	-0.537515	-0.493274	-0.55591	-0.657132	-0.684673	-0.571965	-0.554524			-0.0437633	0.20684	-0.0526884	-0.00701531	0.397839	0.0233484	0.162722	-0.128326	0.177339	0.0147715	-0.0823064	0.126979	0.182083	0.0419118	-0.164616	-0.0304942
MLTS19	-0.642359	-0.600955	-0.527676	-0.463463	-0.580907	-0.545936	-0.478642	-0.531898	-0.551767	-0.557756	-0.533001	-0.507859	-0.519622	-0.51962	-0.563286	-0.55145	-0.555667			-0.0644566	-0.121938	-0.12169	0.253405	-0.0602011	-0.123263	0.111264	0.0373556	0.0108535	-0.0443828	-0.0471714	0.0231629	-3.07639e-06	0.0840326	-0.0210107	0.00764711
MLTS20	-0.731762	-0.604729	-0.493716	-0.280009	-0.442683	-0.41959	-0.378717	-0.267078	-0.30237	-0.312721	-0.267989	-0.433003	-0.473574	-0.544333	-0.601378	-0.585484	-0.538349			-0.173599	-0.183574	-0.432855	0.580962	-0.052166	-0.0974137	-0.294782	0.132144	0.0342332	-0.143041	0.615747	0.0936963	0.149415	0.104798	-0.0264288	-0.0805065
MLTS21	-0.285983	-0.288011	-0.209176	-0.295665	-0.302155	-0.150071	-0.218286	-0.286354	-0.362578	-0.390176	-0.385693	-0.608373	-0.627307	-0.743052	-0.79762	-0.755013	-0.731886			0.00709074	-0.273723	0.413477	0.0219487	-0.503332	0.454554	0.31183	0.266188	0.0761145	-0.0114897	0.577351	0.0311232	0.184511	0.0734371	-0.0534171	-0.0306317
MLTS22	-0.343437	-0.40204	-0.427026	-0.454263	-0.437217	-0.481736	-0.500873	-0.520866	-0.551992	-0.539142	-0.510365	-0.630268	-0.651695	-0.560797	-0.609003	-0.612736	-0.621875			0.170636	0.0621466	0.0637839	-0.0375244	0.101824	0.0397247	0.0399157	0.0597577	-0.0232792	-0.0533751	0.234937	0.0339959	-0.13948	0.0859603	0.0061291	0.0149153
MLTS23	-0.279809	-0.259111	-0.521847	-0.453118	-0.237847	-0.354539	-0.410595	-0.469927	-0.450452	-0.532517	-0.528962	-0.439483	-0.507434	-0.586261	-0.609729	-0.569689	-0.517002			-0.0739721	1.01399	-0.131705	-0.475087	0.490614	0.15811	0.144502	-0.0414419	0.182182	-0.00667457	-0.16916	0.154614	0.155346	0.0400294	-0.0656681	-0.0924847
MLTS24	-0.466993	-0.405501	-0.308954	-0.304434	-0.147142	-0.196773	-0.404289	-0.325154	-0.367502	-0.539959	-0.537107	-0.584772	-0.627847	-0.699517	-0.709844	-0.661806	-0.669354			-0.131676	-0.238094	-0.0146301	-0.516672	0.337307	1.05459	-0.19574	0.130242	0.469265	-0.00528172	0.088744	0.0736627	0.114152	0.0147631	-0.0676747	0.0114046
MLTS25	-0.375527	-0.351443	-0.245255	-0.271382	-0.355592	-0.387431	-0.393175	-0.422366	-0.436827	-0.390028	-0.352716	-0.324319	-0.323366	-0.314181	-0.236714	-0.282789	-0.275807			-0.0641327	-0.30215	0.106532	0.310298	0.0895388	0.0148257	0.0742456	0.0342374	-0.107133	-0.0956642	-0.0805113	-0.00293662	-0.0284048	-0.246567	0.19464	-0.0246887
MLTS26	-0.496281	-0.488418	-0.411411	-0.353372	-0.435758	-0.657658	-0.671896	-0.751824	-0.730335	-0.763697	-0.771386	-0.718295	-0.73967	-0.724568	-0.62528	-0.682728	-0.53032			-0.0158448	-0.157666	-0.141073	0.233141	0.509228	0.0216496	0.11896	-0.0285825	0.045681	0.0100682	-0.0688262	0.0297578	-0.0204173	-0.13703	0.0918758	-0.223234
MLTS27	-0.508949	-0.572799	-0.56477	-0.523663	-0.543547	-0.540363	-0.546402	-0.687358	-0.663628	-0.667793	-0.64811	-0.812521	-0.637706	-0.749375	-0.799284	-0.737682	-0.696158			0.125454	-0.0140167	-0.0727853	0.0379714	-0.00585912	0.0111764	0.257972	-0.0345231	0.00627595	-0.0294751	0.253677	-0.215152	0.175111	0.0666012	-0.0770717	-0.0562895
MLTS28	-0.851243	-0.888061	-0.922498	-0.896867	-0.890085	-0.897106	-0.911661	-0.903908	-0.888536	-0.845318	-0.822124	-0.85605	-0.859094	-0.919592	-0.865207	-0.802634	-0.867119			0.0432521	0.0387782	-0.0277846	-0.00756133	0.00788776	0.0162243	-0.00850387	-0.0170061	-0.0486393	-0.0274382	0.0412653	0.00355654	0.0704202	-0.0591407	-0.0723214	0.0803422
MLTS29	-0.215944	-0.294842	-0.396543	-0.332385	-0.389544	-0.429993	-0.487183	-0.494948	-0.485881	-0.486572	-0.452098	-0.603213	-0.643725	-0.672758	-0.704751	-0.65273	-0.618003			0.365361	0.344935	-0.161792	0.171967	0.103836	0.133002	0.015938	-0.0183178	0.0014207	-0.070849	0.334252	0.0671603	0.0451017	0.0475551	-0.073816	-0.0532019
MLTS30	-0.663949	-0.714661	-0.758489	-0.731601	-0.724222	-0.73689	-0.751497	-0.741614	-0.692844	-0.620183	-0.558692	-0.803463	-0.794986	-0.793283	-0.823986	-0.777758	-0.761287			0.0763787	0.0613264	-0.0354486	-0.0100865	0.0174921	0.0198224	-0.0131515	-0.0657619	-0.104873	-0.0991494	0.438114	-0.0105504	-0.00214239	0.038703	-0.0561026	-0.0211769
MLTS31	-0.522151	-0.537039	-0.181777	-0.146152	-0.163976	-0.183242	-0.223617	-0.239283	-0.23138	-0.298226	-0.226824	-0.535869	-0.593366	-0.696981	-0.679908	-0.610328	-0.599475			0.0285121	-0.66152	-0.195982	0.121954	0.117493	0.220342	0.0700549	-0.0330272	0.2889	-0.239422	1.36249	0.107298	0.174622	-0.0244953	-0.102338	-0.0177808
MLTS32	0.00667109	-0.11362	-0.218843	-0.0673333	-0.181905	-0.214743	-0.278832	-0.283118	-0.325694	-0.326877	-0.287164	-0.500138	-0.582369	-0.707369	-0.754706	-0.672488	-0.649622			-18.0317	0.926099	-0.692321	1.70156	0.180524	0.298441	0.0153721	0.150383	0.00363227	-0.121491	0.741644	0.164416	0.214641	0.06692	-0.108941	-0.0340014
MLTS33	-0.151206	-0.182169	-0.228677	-0.168457	-0.231046	-0.253863	-0.296865	-0.312787	-0.30094	-0.319572	-0.299405	-0.442314	-0.453189	-0.514413	-0.522934	-0.480898	-0.445548			0.204773	0.255304	-0.263341	0.371541	0.0987574	0.169391	0.0536328	-0.0378759	0.0619136	-0.0631075	0.477311	0.0245868	0.135096	0.0165643	-0.0803852	-0.0735079
MLTS34	-0.166576	-0.181283	-0.266333	-0.208837	-0.234583	-0.269326	-0.348882	-0.341305	-0.358429	-0.513109	-0.349466	-0.753747	-0.776149	-0.866324	-0.900751	-0.875613	-0.85735			0.0882937	0.469154	-0.215881	0.123285	0.148103	0.29539	-0.0217169	0.0501723	0.431548	-0.318924	1.15685	0.0297214	0.116183	0.0397393	-0.0279085	-0.0208573
MLTS35	-0.0338315	-0.0309529	-0.0496959	-0.0541262	-0.028228	-0.0290063	-0.040138	-0.0357138	-0.047158	-0.0469395	-0.0470253	-0.0471412	-0.0487918	-0.0573446	-0.0480947	-0.0539903	-0.0489515			-0.085087	0.605533	0.0891474	-0.478478	0.0275718	0.383769	-0.110225	0.320443	-0.00463377	0.00182834	0.00246373	0.0350142	0.175291	-0.161304	0.122585	-0.0933288
NETS1	-0.109867	-0.317821	-0.200595	-0.109396	-0.159944	-0.27433	0.264172	0.217202	0.228076	0.262772	-0.0709868	-0.216293	-0.106508	-0.163736	-0.0524288	-0.0359911	0.0562876			1.89278	-0.368845	-0.454641	0.462061	0.71517	-1.96297	-0.177801	0.0500651	0.152126	-1.27015	2.04695	-0.507578	0.537315	-0.679796	-0.313525	-2.56393
NETS2	-0.607091	-0.592767	-0.342879	-0.527276	-0.540845	-0.504574	-0.531341	-0.522505	-0.52522	-0.513737	-0.507132	-0.434289	-0.320399	-0.299886	-0.339295	-0.418663	-0.398528			-0.0235949	-0.421561	0.537789	0.0257342	-0.0670646	0.0530498	-0.016629	0.00519495	-0.0218623	-0.0128575	-0.143638	-0.262245	-0.0640218	0.131413	0.233919	-0.0480928
NETS3	-0.155144	-0.281934	-0.0518259	-0.0627474	-0.0807008	-0.262702	0.245122	0.276586	0.193945	0.148008	-0.11991	-0.192013	-0.237838	-0.0697525	-0.12349	-0.159955	-0.038559			0.817244	-0.816177	0.210734	0.286121	2.25526	-1.93308	0.128363	-0.298792	-0.236857	-1.81016	0.601311	0.238653	-0.706723	0.7704	0.295291	-0.758939
NETS4	-0.197812	-0.180034	-0.194549	-0.179038	-0.172175	-0.202804	-0.218021	-0.168294	-0.216222	-0.218172	-0.152025	-0.0820695	-0.0586143	-0.0636994	-0.1034	-0.102851	-0.0665342			-0.0898718	0.0806196	-0.0797242	-0.0383356	0.177894	0.0750368	-0.228084	0.284785	0.00901769	-0.303186	-0.460158	-0.285797	0.0867552	0.623246	-0.00530412	-0.353103
NETS5	-0.0447963	-0.0335355	-0.0389485	-0.0351855	-0.0358683	-0.035317	-0.0469174	-0.0456541	-0.0442192	-0.0537555	-0.036595	-0.0365162	-0.0413746	-0.0310861	-0.0525783	-0.0470711	-0.0424506			-0.251377	0.16141	-0.0966131	0.0194054	-0.0153697	0.328463	-0.0269247	-0.0314301	0.21566	-0.319232	-0.00215385	0.133046	-0.248666	0.691375	-0.104742	-0.098161
NETS6	0.0458704	0.0773558	0.187211	0.0463355	0.0962108	0.0464367	-0.118218	-0.119529	-0.130598	-0.146953	-0.203627	-0.240285	-0.186848	-0.159521	-0.146698	-0.142219	-0.10968			0.686399	1.42013	-0.752496	1.07639	-0.517344	-3.54579	0.0110884	0.0926037	0.125234	0.385662	0.180023	-0.222391	-0.146249	-0.0803874	-0.0305329	-0.228792
NETS7	0.215562	0.230398	0.351637	0.18525	0.239673	0.177261	-0.076294	-0.00846253	-0.166895	-0.200369	-0.377009	-0.325843	-0.345263	-0.255997	-0.26833	-0.256519	-0.159599			0.0688248	0.526218	-0.473177	0.293778	-0.260404	-1.43041	-0.88908	18.7216	0.200571	0.881573	-0.135716	0.0595983	-0.258544	0.0481755	-0.0440143	-0.37783
NETS8	-0.45663	-0.518698	-0.395824	-0.497405	-0.511596	-0.513082	-0.491233	-0.47048	-0.432001	-0.379975	-0.424994	-0.496294	-0.344148	-0.365917	-0.4944	-0.478262	-0.32097			0.135926	-0.236889	0.25663	0.0285303	0.0029058	-0.042584	-0.0422484	-0.0817848	-0.120431	0.118478	0.167768	-0.306565	0.0632559	0.351125	-0.0326423	-0.328882
NETS9	-0.656802	-0.636221	-0.567057	-0.607464	-0.594943	-0.589451	-0.563704	-0.566908	-0.564034	-0.552398	-0.579576	-0.663017	-0.534047	-0.572919	-0.627545	-0.597034	-0.556615			-0.0313352	-0.108711	0.071257	-0.0206115	-0.00923093	-0.0436794	0.00568327	-0.00506928	-0.0206305	0.0492006	0.143969	-0.19452	0.0727878	0.0953472	-0.0486193	-0.0676999
NETS10	-0.309351	-0.281892	-0.285359	-0.280299	-0.29291	-0.28356	-0.143181	-0.254576	-0.261616	-0.258867	-0.28172	-0.316817	-0.213029	-0.32452	-0.287452	-0.258532	-0.228005			-0.0887628	0.0122983	-0.0177315	0.0449892	-0.031919	-0.495061	0.778009	0.0276532	-0.0105096	0.088283	0.124581	-0.327597	0.523364	-0.114227	-0.100606	-0.118078
NETS11	0.305062	0.335356	0.41554	0.24108	0.312439	0.240816	-0.0346149	-0.048826	-0.0823051	-0.110561	-0.239752	-0.4037	-0.281843	-0.200921	-0.209293	-0.19782	-0.114692			0.0993067	0.239099	-0.41984	0.295998	-0.229238	-1.14374	0.410548	0.68568	0.343305	1.16851	0.683824	-0.301851	-0.287115	0.0416681	-0.05482	-0.420221
NETS12	-0.214124	-0.257815	0.110291	-0.172052	-0.229603	-0.177341	-0.0809788	-0.0991094	-0.12307	-0.153718	-0.440712	-0.384973	-0.279429	-0.411146	-0.578066	-0.56365	-0.41172			0.204045	-1.42779	-2.55998	0.3345	-0.227619	-0.543373	0.223893	0.241757	0.249028	1.86703	-0.126477	-0.274158	0.471379	0.405985	-0.0249378	-0.269547
NETS13	-0.462751	-0.486105	-0.349904	-0.282988	-0.30057	-0.334008	-0.161533	-0.218943	-0.254135	-0.196734	-0.457693	-0.357185	-0.268728	-0.213823	-0.144334	-0.157131	-0.0707308			0.0504671	-0.280188	-0.19124	0.0621306	0.111247	-0.516378	0.355404	0.160736	-0.225869	1.32646	-0.219598	-0.247648	-0.204315	-0.324982	0.0886559	-0.54986
NETS14	0.233635	0.272605	0.0968346	-0.272104	-0.177696	-0.0439702	-0.0690947	0.00134929	-0.162666	-0.197492	-0.402606	-0.346865	-0.291425	-0.308342	-0.258895	-0.243681	-0.274704			0.166799	-0.644781	-3.80999	-0.346955	-0.752554	0.5714	-1.01953	-121.557	0.214092	1.03859	-0.13845	-0.15983	0.0580495	-0.160367	-0.0587637	0.127311
NETS15	-0.361545	-0.342048	-0.290391	-0.321001	-0.345176	-0.373146	-0.320837	-0.312674	-0.347259	-0.379497	-0.370046	-0.368781	-0.376222	-0.407317	-0.33823	-0.345637	-0.317917			-0.0539265	-0.151022	0.10541	0.075312	0.0810305	-0.140184	-0.0254443	0.110611	0.0928362	-0.0249036	-0.00342024	0.0201793	0.0826495	-0.169614	0.0218973	-0.0801987
NETS16	-0.017524	-0.0107	0.0224843	-0.0459086	-0.0302998	-0.0443311	-0.0996863	-0.0835912	-0.110494	-0.12377	-0.116857	-0.126188	-0.153328	-0.0939576	-0.0901784	-0.0822917	-0.0750032			-0.38941	-3.10134	-3.04181	-0.339997	0.463085	1.24867	-0.161458	0.321841	0.120147	-0.0558551	0.0798561	0.215071	-0.387211	-0.0402223	-0.0874572	-0.0885691
NETS17	-0.09265	0.0294876	0.0794956	-0.222917	-0.254294	-0.299553	-0.275574	-0.273301	-0.297801	-0.279861	-0.3385	-0.22364	-0.149369	-0.0665321	-0.212787	-0.210571	-0.023153			-1.31827	1.6959	-3.80414	0.140755	0.177981	-0.0800502	-0.00824874	0.0896452	-0.0602398	0.209527	-0.339319	-0.332103	-0.554578	2.19826	-0.010415	-0.890046
NETS18	0.501099	0.528097	0.59673	0.423521	0.473864	0.422042	0.075966	0.0685488	0.00614147	-0.0382956	-0.219185	-0.628343	-0.351721	-0.138424	-0.161762	-0.136669	0.0718032			0.0538776	0.129964	-0.290264	0.118867	-0.10936	-0.820004	-0.0976385	-0.910407	-7.23556	4.72352	1.86672	-0.440241	-0.606438	0.168597	-0.155121	-1.52538
NETS19	0.231826	0.268313	0.376891	0.231196	0.299955	0.242633	-0.0482505	0.0357439	-0.154195	-0.19562	-0.402907	-0.387098	-0.446983	-0.292549	-0.325988	-0.302275	-0.13801			0.157392	0.404668	-0.38657	0.297406	-0.191101	-1.19886	-1.7408	-5.31388	0.268657	1.05964	-0.0392374	0.154702	-0.345502	0.114302	-0.0727435	-0.543427
NETS20	0.206214	0.27156	0.434119	0.396836	0.365568	0.34202	0.168482	0.257789	0.0667819	0.0137915	-0.229371	-0.238447	-0.354434	-0.209023	-0.269447	-0.237527	-0.0893144			0.316884	0.598612	-0.0858823	-0.0787938	-0.0644136	-0.507391	0.530065	-0.740944	-0.793485	-17.6313	0.0395684	0.486428	-0.410261	0.289076	-0.118464	-0.623983
NETS21	0.0406847	0.137189	0.20682	0.00693676	0.0307016	0.00828796	-0.0825451	-0.0609588	-0.0973119	-0.117102	-0.193737	-0.289603	-0.290091	-0.226934	-0.228514	-0.20751	-0.111449			2.37199	0.507564	-0.96646	3.42593	-0.730048	-10.9596	-0.26151	0.596357	0.203372	0.654424	0.494827	0.00168375	-0.217716	0.00696457	-0.0919153	-0.462923
NETS22	0.209726	0.236849	0.312534	0.126854	0.190821	0.147061	-0.0892169	-0.016079	-0.16565	-0.201178	-0.397719	-0.412952	-0.471316	-0.29538	-0.32374	-0.305208	-0.112198			0.129327	0.319552	-0.594112	0.504262	-0.229328	-1.60667	-0.819776	9.30223	0.21448	0.97695	0.0382999	0.141334	-0.373288	0.0960117	-0.0572436	-0.632388
NETS23	0.0476555	0.0894562	0.246354	0.152523	0.205478	0.147282	-0.214886	-0.207105	-0.0115061	-0.0198619	-0.229126	-0.184128	-0.125056	-0.102284	-0.198095	-0.189247	-0.106194			0.877142	1.7539	-0.380877	0.347193	-0.283224	-2.45901	-0.0362127	-0.944443	0.726204	10.536	-0.196388	-0.320822	-0.182091	0.936713	-0.0446658	-0.43886
NETS24	-0.0276465	-0.060039	0.0810023	-0.369057	-0.342423	-0.330168	-0.242483	-0.336188	-0.396846	-0.330551	-0.379244	-0.41124	-0.480978	-0.28435	-0.379394	-0.441001	-0.253991			1.17167	-2.34916	-5.55613	-0.0721687	-0.0357899	-0.265576	0.386438	0.18043	-0.167055	0.147309	0.084369	0.169579	-0.408808	0.334248	0.162382	-0.424058
NETS25	0.175969	0.19066	0.210907	0.0809186	0.147041	0.0991603	-0.104097	-0.0774878	-0.153714	-0.179376	-0.293576	-0.277648	-0.297601	-0.175095	-0.184982	-0.205264	-0.151527			0.0834861	0.106198	-0.61633	0.817143	-0.325627	-2.04979	-0.25562	0.983722	0.166942	0.636656	-0.0542568	0.0718639	-0.411643	0.0564634	0.109643	-0.261795
NETS26	-0.134611	-0.0215462	0.248665	0.262957	0.233478	0.211196	0.0222742	0.0606201	0.0509738	0.00460475	-0.175362	-0.234656	-0.1832	-0.147776	-0.42985	-0.117211	-0.039044			-0.839937	-12.541	0.0574753	-0.112109	-0.0954347	-0.894533	1.72154	-0.159128	-0.909664	-39.0829	0.33812	-0.219283	-0.193359	1.90879	-0.727321	-0.666891
NETS27	0.210907	0.230029	0.350082	0.206919	0.268974	0.215614	-0.0625558	0.017543	-0.162197	-0.200953	-0.39854	-0.372777	-0.40719	-0.285564	-0.303376	-0.276558	-0.15999			0.0906639	0.521903	-0.408942	0.299901	-0.198381	-1.29013	-1.28044	-10.2457	0.238941	0.983257	-0.0646455	0.0923174	-0.298696	0.0623734	-0.0883978	-0.421496
NETS28	0.259918	0.372881	0.594102	0.548891	0.582711	0.583703	0.42382	0.459068	0.295987	0.236227	0.0260649	-0.089623	-0.242876	0.0182778	-0.0957388	-0.0977968	0.145007			0.434613	0.593273	-0.0761002	0.0616165	0.00170145	-0.273912	0.0831692	-0.355245	-0.2019	-0.889662	-4.43846	1.70998	-1.07526	-6.23799	0.0214967	-2.48274
NETS29	0.383007	0.416609	0.514345	0.366018	0.427126	0.374004	0.107575	0.186763	-0.0310298	-0.0930696	-0.346114	-0.298742	-0.432989	-0.185816	-0.245345	-0.208533	0.0471802			0.0877319	0.234598	-0.288381	0.166954	-0.124371	-0.712368	0.736117	-1.16615	1.99936	2.71887	-0.136867	0.44937	-0.570853	0.320367	-0.150042	-1.22625
NETS30	0.559072	0.592496	0.671015	0.521354	0.584316	0.541891	0.144907	0.17535	-0.0612618	-0.16244	-0.534595	-0.532274	-0.623588	-0.314007	-0.378174	-0.341758	0.00307484			0.0597843	0.132523	-0.223037	0.120768	-0.0726075	-0.732589	0.210085	-1.34937	1.65157	2.29103	-0.00434277	0.171555	-0.496451	0.20435	-0.0962936	-1.009
NETS31	0.178659	0.211517	0.254227	0.0857631	0.132815	0.0828931	-0.408153	-0.406929	-0.375487	-0.403275	-0.480199	-0.627655	-0.381786	-0.434936	-0.258313	-0.282881	-0.157209			0.183916	0.201921	-0.662652	0.54863	-0.375877	-5.92384	-0.00299715	-0.0772661	0.0740044	0.190749	0.307073	-0.391727	0.139215	-0.406089	0.0951076	-0.444256
NETS32	0.236996	0.277664	0.290879	0.0676613	0.123903	0.0851611	-0.109468	-0.0564621	-0.166458	-0.197965	-0.340005	-0.359758	-0.391579	-0.276651	-0.293786	-0.276011	-0.159685			0.171599	0.0475935	-0.76739	0.831224	-0.312679	-2.28542	-0.484213	1.94814	0.189279	0.717503	0.0580946	0.0884524	-0.2935	0.0619398	-0.060503	-0.421454
NETS33	0.0270634	0.0463739	0.150284	0.0529191	0.0842707	0.048852	-0.260183	-0.25692	-0.227345	-0.217899	-0.285192	-0.26402	-0.27733	-0.208538	-0.225286	-0.210413	-0.146064			0.713526	2.24072	-0.647874	0.592444	-0.420296	-6.32593	-0.0125396	-0.115114	-0.0415492	0.308829	-0.0742383	0.0504125	-0.248052	0.0803145	-0.0660197	-0.30582
NETS34	0.255993	0.294173	0.42768	0.278207	0.345533	0.293831	-0.0172172	0.0802391	-0.135364	-0.18521	-0.397004	-0.418339	-0.498681	-0.273046	-0.322834	-0.290617	-0.0355077			0.149144	0.453839	-0.349498	0.242001	-0.149629	-1.0586	-5.6604	-2.68701	0.368229	1.14354	0.0537418	0.19205	-0.452464	0.182343	-0.0997954	-0.87782
NETS35																				#DIV/0!	#DIV/0!	#DIV/0!	#DIV/0!	#DIV/0!	#DIV/0!	#DIV/0!	#DIV/0!	#DIV/0!	#DIV/0!	#DIV/0!	#DIV/0!	#DIV/0!	#DIV/0!	#DIV/0!	#DIV/0!
NORS1	0.403982	0.362885	0.295601	0.0251048	0.0550628	0.478849	-0.186244	-0.123886	0.0727816	0.36955	-0.0677483	0.548144	0.572678	0.571384	0.507633	0.5226	0.432182			-0.101728	-0.185416	-0.915072	1.19332	7.69643	-1.38894	-0.33482	-1.58749	4.07752	-1.18333	-9.09089	0.0447577	-0.00225928	-0.111573	0.029484	-0.173017
NORS2	-0.832061	-0.836498	-0.808356	-0.811772	-0.785248	-0.769744	-0.82182	-0.850952	-0.870919	-0.846821	-0.823733	-0.909988	-0.855523	-0.83016	-0.881914	-0.906133	-0.870401			0.0053326	-0.0336424	0.00422596	-0.0326744	-0.0197441	0.0676542	0.0354476	0.0234649	-0.0276699	-0.0272648	0.104712	-0.0598517	-0.029646	0.0623416	0.0274618	-0.0394335
NORS3	0.174096	0.138673	0.0482076	-0.148217	-0.150933	0.288082	-0.290388	-0.251139	-0.160421	0.100391	-0.259493	0.303125	0.335856	0.374949	0.354832	0.305274	0.276859			-0.203469	-0.652366	-4.07455	0.018325	-2.90868	-2.008	-0.135159	-0.361228	-1.6258	-3.58483	-2.16814	0.107977	0.116398	-0.0536521	-0.139665	-0.0930798
NORS4	-0.114013	-0.111132	-0.126578	-0.125228	-0.123915	-0.121641	-0.150761	-0.151252	-0.119856	-0.123704	-0.114368	-0.11887	-0.101933	-0.0759505	-0.0704781	-0.070786	-0.0749301			-0.0252722	0.138992	-0.0106709	-0.0104867	-0.0183472	0.239392	0.00325919	-0.207576	0.0321072	-0.075469	0.0393587	-0.142482	-0.254897	-0.0720524	0.0043688	0.0585441
NORS5	-0.0496298	-0.0506367			-0.0887609	-0.0959829	-0.113088	-0.108451	-0.0601878	-0.0694361	-0.0672664	-0.0856675	-0.0443781	-0.0581648	-0.0369818	-0.0465049	-0.0376118			0.0202864	-1	#DIV/0!	#DIV/0!	0.0813649	0.178206	-0.0409994	-0.445024	0.153657	-0.0312466	0.273555	-0.481972	0.310663	-0.36419	0.257507	-0.191228
NORS6	0.151911	0.00206502	0.144677	0.104644	0.0824273	0.10704	-0.0259833	-0.0469678	-0.0308403	0.0311489	0.0779791	-0.0417028	0.0451645	0.0226882	0.00181936	-0.0236229	-0.0504935			-0.986406	69.0608	-0.276705	-0.212309	0.298595	-1.24274	0.807611	-0.343373	-2.01001	1.50343	-1.5348	-2.08301	-0.497655	-0.91981	-13.9842	1.13748
NORS7	-0.0913572	-0.10011	-0.177573	-0.190984	-0.17142	-0.164997	-0.31808	-0.329984	-0.340827	-0.271426	-0.23866	-0.340137	-0.231945	-0.231675	-0.280448	-0.307584	-0.301278			0.0958102	0.773781	0.0755191	-0.102438	-0.0374689	0.927797	0.0374242	0.0328598	-0.203625	-0.120719	0.425195	-0.318083	-0.00116566	0.210522	0.0967598	-0.0205019
NORS8	-0.467982	-0.621322	-0.513884	-0.53631	-0.570706	-0.515421	-0.482794	-0.280356	-0.493525	-0.456592	-0.493916	-0.505312	-0.337294	-0.457476	-0.385219	-0.375597	-0.3752			0.327662	-0.172918	0.0436391	0.0641343	-0.0968711	-0.0633009	-0.419305	0.760351	-0.0748347	0.0817447	0.0230725	-0.332504	0.356315	-0.157948	-0.0249795	-0.00105562
NORS9	-0.72482	-0.715261	-0.627131	-0.391994	-0.209396	-0.543504	-0.538184	-0.560408	-0.423244	-0.357908	-0.33235	-0.555259	-0.500232	-0.520373	-0.577645	-0.511749	-0.482185			-0.013188	-0.123214	-0.374941	-0.465818	1.59558	-0.00978904	0.0412936	-0.244757	-0.154369	-0.07141	0.670704	-0.0991005	0.0402626	0.11006	-0.114078	-0.0577693
NORS10	-0.0849357	-0.129556	-0.0697277	-0.087257	-0.0959442	-0.0894197	-0.141486	-0.143094	-0.134901	-0.125113	-0.0994341	-0.134753	-0.109789	-0.117641	-0.108734	-0.118854	-0.11819			0.525345	-0.461796	0.251397	0.0995582	-0.0680028	0.582268	0.0113655	-0.0572558	-0.0725561	-0.205247	0.355194	-0.185252	0.0715145	-0.0757131	0.0930716	-0.00558732
NORS11	0.0773764	-0.0411886	0.109966	0.0689007	0.0390206	0.0478969	-0.0819728	-0.0816419	-0.0853609	-0.0347496	0.0201572	-0.0836169	-0.00150508	-0.0422109	-0.065171	-0.0785341	-0.0975492			-1.53232	-3.66982	-0.373438	-0.433669	0.227476	-2.71144	-0.00403568	0.0455518	-0.592909	-1.58007	-5.14825	-0.982	27.0456	0.543938	0.205047	0.242126
NORS12	-0.568298	-0.52642	-0.390731	-0.464978	-0.627286	-0.52181	-0.367336	-0.38745	-0.510704	-0.503745	-0.523364	-0.401489	-0.171944	-0.130941	-0.207029	-0.307601	-0.113806			-0.0736898	-0.257758	0.190019	0.349066	-0.168146	-0.296035	0.0547576	0.318114	-0.0136252	0.0389465	-0.23287	-0.571735	-0.238466	0.58109	0.485785	-0.630022
NORS13	-0.602585	-0.589489	-0.586938	-0.592031	-0.591306	-0.552681	-0.641909	-0.651128	-0.661505	-0.619166	-0.583318	-0.631558	-0.584795	-0.58762	-0.618952	-0.629125	-0.618144			-0.0217323	-0.00432727	0.00867653	-0.0012249	-0.0653203	0.161444	0.0143621	0.0159373	-0.0640032	-0.0578986	0.0827009	-0.0740449	0.0048312	0.0533193	0.0164364	-0.0174537
NORS14	-0.0620299	-0.128995	-0.14142	-0.0650936	-0.0832389	-0.0744916	-0.142255	-0.144332	-0.139447	-0.124531	-0.0950059	-0.143309	-0.106234	-0.121439	-0.4787	-0.279389	-0.111018			1.07956	0.0963196	-0.539714	0.278758	-0.105087	0.909677	0.014602	-0.0338476	-0.106967	-0.237088	0.508426	-0.258712	0.143136	2.94188	-0.41636	-0.60264
NORS15	-0.487746	-0.49679	-0.49312	-0.415854	-0.390185	-0.32791	-0.407585	-0.407528	-0.389455	-0.356615	-0.290495	-0.297529	-0.304822	-0.288728	-0.292955	-0.293568	-0.31384			0.0185412	-0.00738574	-0.156688	-0.061726	-0.159605	0.242978	-0.000139266	-0.044348	-0.0843221	-0.185411	0.024216	0.0245091	-0.0527985	0.0146432	0.00209019	0.0690564
NORS16	-0.177522	-0.166877	-0.177257	-0.153291	-0.181856	-0.170946	-0.23664	-0.243501	-0.224724	-0.209622	-0.177455	-0.212526	-0.174004	-0.19716	-0.164988	-0.163584	-0.165215			-0.0599654	0.0622	-0.135202	0.186346	-0.0599964	0.3843	0.0289919	-0.0771095	-0.0672053	-0.153452	0.197636	-0.18126	0.133078	-0.163175	-0.00851286	0.00997067
NORS17	-0.364452	-0.271145	-0.0752939	-0.0922364	-0.267566	-0.238234	-0.224893	-0.201451	-0.239906	-0.196406	-0.168874	-0.0984018	-0.0602579	-0.105077	-0.224753	-0.265864	-0.205221			-0.256022	-0.722311	0.225019	1.90087	-0.109624	-0.0559991	-0.104236	0.19089	-0.181321	-0.140177	-0.417307	-0.387634	0.743783	1.13894	0.18292	-0.228099
NORS18	0.135284	-0.00176371	0.203144	0.168312	0.157137	0.161045	0.0281971	0.0277954	0.0418918	0.112366	0.17546	0.0958993	0.208474	0.207524	0.124727	0.0978091	0.106224			-1.01304	-116.18	-0.171466	-0.0663926	0.0248717	-0.824912	-0.0142482	0.50715	1.68229	0.561501	-0.453439	1.17389	-0.00456053	-0.398975	-0.215814	0.0860376
NORS19	-0.0051982	-0.0475179	-0.0463769	-0.0872649	-0.144257	-0.124418	-0.202237	-0.205277	-0.177293	-0.136073	-0.0680624	-0.172411	-0.107204	-0.122452	-0.160889	-0.175277	-0.177433			8.14123	-0.0240135	0.881648	0.653098	-0.13753	0.62547	0.0150312	-0.136325	-0.232494	-0.49981	1.53314	-0.378207	0.142228	0.3139	0.0894279	0.0122975
NORS20	0.129684	0.0931968	0.051717	0.0246613	-0.017192	0.0170557	-0.22315	-0.229562	-0.208269	-0.0997615	-0.0490666	-0.165679	-0.0422454	-0.0538629	-0.111049	-0.144256	-0.138115			-0.281357	-0.445078	-0.523148	-1.69712	-1.99208	-14.0836	0.0287324	-0.0927537	-0.520998	-0.508161	2.37661	-0.745016	0.275003	1.0617	0.299029	-0.0425687
NORS21	-0.0305399	-0.0747547	-0.0751411	-0.0604775	-0.146556	-0.114254	-0.242521	-0.251349	-0.232967	-0.169513	-0.0993217	-0.237327	-0.133101	-0.140101	-0.184411	-0.209973	-0.206314			1.44778	0.00516809	-0.195147	1.42331	-0.220403	1.12264	0.0364005	-0.0731338	-0.272374	-0.414075	1.38948	-0.439167	0.0525936	0.316271	0.138617	-0.0174271
NORS22	-0.165378	-0.152127	-0.161417	-0.165221	-0.214209	-0.188998	-0.234817	-0.24209	-0.230053	-0.216941	-0.195494	-0.235173	-0.198911	-0.197528	-0.207365	-0.23623	-0.241822			-0.0801255	0.0610674	0.0235686	0.2965	-0.117694	0.242432	0.0309696	-0.0497177	-0.0569966	-0.0988623	0.202968	-0.154191	-0.00695399	0.0498015	0.139195	0.023675
NORS23	0.0692389	0.0485083	0.00992217	-0.0420689	-0.0676137	-0.0712444	-0.189056	-0.194774	-0.169857	-0.135876	-0.0691516	-0.184825	-0.125964	-0.158884	-0.139331	-0.156537	-0.160801			-0.299407	-0.795454	-5.23989	0.607216	0.0536967	1.65362	0.0302465	-0.127928	-0.200058	-0.491067	1.67275	-0.318469	0.261343	-0.123061	0.123492	0.0272357
NORS24	-0.668241	-0.75993	-0.611964	-0.825047	-0.776811	-0.804354	-0.797942	-0.753544	-0.802318	-0.783959	-0.815522	-0.791668	-0.505933	-0.636853	-0.470273	-0.481514	-0.474342			0.13721	-0.19471	0.348197	-0.0584651	0.0354565	-0.00797142	-0.0556411	0.0647265	-0.0228822	0.0402605	-0.0292495	-0.360927	0.258768	-0.261567	0.0239022	-0.0148933
NORS25	-0.18912	-0.176089	-0.193128	-0.197072	-0.197848	-0.183545	-0.309646	-0.318469	-0.333323	-0.273395	-0.232783	-0.325036	-0.238483	-0.19323	-0.237698	-0.250464	-0.254271			-0.0689063	0.0967642	0.0204231	0.00393688	-0.0722904	0.687024	0.0284932	0.0466434	-0.179791	-0.148545	0.396302	-0.266287	-0.189752	0.23013	0.0537052	0.0151981
NORS26	0.02291	-0.0275989	-0.196493	-0.610516	-0.532255	-0.562036	-0.568075	-0.537055	-0.584822	-0.553122	-0.576811	-0.577109	-0.0716166	-0.303502	-0.138061	-0.246498	-0.134582			-2.20466	6.1196	2.10706	-0.128188	0.0559533	0.0107436	-0.0546053	0.0889426	-0.0542042	0.0428271	0.00051771	-0.875905	3.23787	-0.545106	0.78542	-0.454023
NORS27	-0.188795	-0.174647	-0.196048	-0.198917	-0.199397	-0.183803	-0.301881	-0.308716	-0.303156	-0.261804	-0.241243	-0.30877	-0.23493	-0.244399	-0.263797	-0.27417	-0.279174			-0.0749385	0.122542	0.0146335	0.00241288	-0.0782032	0.642411	0.0226435	-0.0180107	-0.136406	-0.0785345	0.279909	-0.239143	0.0403067	0.0793724	0.0393201	0.0182502
NORS28	-0.177859	-0.165897	-0.20735	-0.205174	-0.214785	-0.0919167	-0.286127	-0.312253	-0.327085	-0.234313	-0.214856	-0.203641	-0.0606165	-0.0362899	-0.143446	-0.160426	-0.136164			-0.0672556	0.249874	-0.0104983	0.0468435	-0.572052	2.11289	0.0913086	0.047501	-0.283632	-0.0830379	-0.0521971	-0.702337	-0.401321	2.95279	0.118371	-0.151239
NORS29	0.0459467	0.0669608	0.0212183	-0.012827	-0.0138896	-0.00372763	-0.17613	-0.18831	-0.205681	-0.126848	-0.0803136	-0.20486	-0.0661385	-0.0712387	-0.123348	-0.175096	-0.168369			0.457356	-0.683123	-1.60452	0.0828487	-0.731625	46.2497	0.0691546	0.0922506	-0.383282	-0.366849	1.55075	-0.677152	0.0771137	0.731478	0.419526	-0.0384167
NORS30	-0.249004	-0.218747	-0.250238	-0.254635	-0.172041	-0.195915	-0.395962	-0.41551	-0.42815	-0.328272	-0.260812	-0.413492	-0.228851	-0.218516	-0.319637	-0.388121	-0.345929			-0.121514	0.143965	0.017571	-0.324362	0.138769	1.02109	0.0493669	0.0304205	-0.233278	-0.205502	0.585405	-0.44654	-0.045162	0.462765	0.214255	-0.108708
NORS31	-0.472991	-0.592017	-0.438513	-0.440404	-0.389319	-0.365042	-0.468392	-0.459859	-0.473476	-0.414081	-0.357136	-0.382026	-0.343006	-0.382562	-0.408219	-0.407998	-0.389225			0.251646	-0.259291	0.00431375	-0.115997	-0.0623558	0.283117	-0.0182179	0.029611	-0.125444	-0.137521	0.0696935	-0.10214	0.115322	0.0670657	-0.000542568	-0.0460122
NORS32	-0.134592	-0.136205	-0.118812	-0.120865	-0.12507	-0.125075	-0.153511	-0.156091	-0.157263	-0.153837	-0.130155	-0.141366	-0.12475	-0.179529	-0.157794	-0.160723	-0.161812			0.0119823	-0.127698	0.0172828	0.0347866	4.05324e-05	0.227354	0.0168042	0.00750823	-0.0217848	-0.153939	0.0861304	-0.117537	0.439114	-0.12107	0.0185661	0.00677275
NORS33	-0.171038	-0.115764	-0.0870642	-0.0849198	-0.090541	-0.0954665	-0.122997	-0.122258	-0.122382	-0.117735	-0.0997195	-0.114657	-0.101307	-0.108714	-0.10089	-0.547421	-0.14409			-0.32317	-0.247914	-0.0246298	0.0661934	0.0544008	0.288375	-0.00600687	0.0010125	-0.0379719	-0.153014	0.149799	-0.116435	0.0731083	-0.0719649	4.42592	-0.736783
NORS34	-0.175649	-0.171546	-0.194062	-0.197936	-0.197234	-0.181292	-0.304684	-0.313927	-0.314051	-0.26427	-0.234765	-0.317314	-0.234787	-0.239832	-0.258838	-0.272175	-0.276611			-0.0233582	0.131254	0.0199586	-0.00354453	-0.0808263	0.680624	0.0303361	0.000395887	-0.158515	-0.111645	0.351621	-0.260079	0.0214858	0.0792496	0.051525	0.0163008
NORS35	-0.0285714	-0.0285731	-0.0571429	-0.0571429	-0.0285715	-0.0392734	-0.028584	-0.0285714	-0.0285714	-0.0285714	-0.0285714	-0.0285714	-0.0285715	-0.0285715						5.86958e-05	0.999883	3.79684e-07	-0.499999	0.374568	-0.272179	-0.000440013	-4.04872e-07	-1.56941e-08	3.14882e-10	-5.99192e-09	7.06564e-07	2.45316e-07	-1	#DIV/0!	#DIV/0!
POLS1	0.38413	0.406775	0.449426	0.513738	0.534049	0.53156	0.431382	0.4191	0.412735	0.411047	0.450218	0.307843	0.489673	0.426354	0.44668	0.408055	0.165733			0.0589503	0.104851	0.143099	0.0395364	-0.00466168	-0.18846	-0.0284698	-0.0151891	-0.00409006	0.095297	-0.316236	0.590658	-0.129307	0.0476728	-0.0864718	-0.593845
POLS2	0.17573	0.261111	0.394633	0.325865	0.303879	0.31496	0.324988	0.337887	0.308111	0.24925	0.24394	-0.148098	0.134015	-0.139151	-0.236507	-0.127626	0.0358174			0.485864	0.511359	-0.174257	-0.0674706	0.0364664	0.0318373	0.0396905	-0.0881244	-0.191039	-0.0213011	-1.60711	-1.90491	-2.03832	0.69965	-0.460371	-1.28064
POLS3	0.145294	0.205003	0.279369	0.351798	0.350308	0.344541	0.336821	0.321565	0.285925	0.290901	0.281847	0.0983865	0.321637	0.291001	0.276051	0.290958	0.150165			0.410947	0.362758	0.259257	-0.00423321	-0.0164644	-0.0224058	-0.0452945	-0.110833	0.0174035	-0.0311238	-0.650922	2.26911	-0.0952498	-0.0513744	0.0540017	-0.483896
POLS4	-0.318859	-0.272511	-0.361077	-0.255377	-0.230213	-0.200681	-0.207719	-0.179078	-0.227147	-0.228023	-0.182819	-0.127872	-0.129599	-0.110318	-0.150513	-0.086622	0.00176724			-0.145355	0.324998	-0.292736	-0.0985368	-0.128279	0.035069	-0.137884	0.268426	0.00385694	-0.198244	-0.300552	0.0135068	-0.148776	0.364358	-0.42449	-1.0204
POLS5	-0.319939	-0.22679	-0.0184566	-0.0163346	-0.166267	-0.176809	-0.176386	-0.193369	-0.217187	-0.210115	-0.175462	-0.102134	-0.0176394	-0.0184796	-0.0153438	-0.0534579	-0.00649709			-0.291147	-0.918618	-0.114974	9.17881	0.063408	-0.00239601	0.0962881	0.123171	-0.0325619	-0.164921	-0.417913	-0.827292	0.0476306	-0.169692	2.48402	-0.878464
POLS6	0.18551	0.242655	0.291087	0.349365	0.329174	0.315923	0.296583	0.276055	0.242245	0.174263	0.238259	-0.215045	0.211258	0.226217	0.22326	0.22883	0.272265			0.308038	0.199593	0.20021	-0.0577948	-0.040256	-0.0612165	-0.0692158	-0.122473	-0.280635	0.367239	-1.90257	-1.98239	0.0708108	-0.0130731	0.0249505	0.189814
POLS7	0.0564273	0.096114	0.148598	0.212278	0.144965	0.148034	0.047986	0.0356658	-0.0209942	0.0346712	0.0435629	-0.142147	-0.0376424	0.109487	0.107801	0.0934231	0.153726			0.703326	0.546056	0.428539	-0.317097	0.0211685	-0.675844	-0.256746	-1.58864	-2.65146	0.256457	-4.26303	-0.735187	-3.9086	-0.015394	-0.133377	0.64548
POLS8	0.12973	0.242169	0.287302	0.384236	0.442444	0.439551	0.432139	0.420989	0.394898	0.367039	0.357945	0.113689	0.350704	0.264056	0.225977	0.219567	0.305141			0.866718	0.186372	0.337394	0.15149	-0.00653768	-0.0168636	-0.0258004	-0.0619769	-0.0705459	-0.0247783	-0.682383	2.08475	-0.247069	-0.144208	-0.0283644	0.389738
POLS9	-0.22822	-0.270621	0.103709	-0.0126203	-0.137478	-0.143634	-0.245558	-0.248785	-0.332435	-0.337155	-0.31613	-0.168003	0.181191	-0.0633811	0.118374	0.00651737	0.133845			0.185787	-1.38323	-1.12169	9.89346	0.0447738	0.709612	0.0131399	0.336235	0.0141981	-0.0623597	-0.468563	-2.0785	-1.3498	-2.86765	-0.944942	19.5367
POLS10	0.140707	0.267732	0.283618	0.269247	0.234307	0.208931	0.187908	0.128298	0.152539	0.0955079	0.126075	-0.289804	0.31793	0.217506	0.278161	0.266508	0.370924			0.90276	0.0593392	-0.050673	-0.129767	-0.108303	-0.100621	-0.31723	0.188939	-0.373877	0.320047	-3.29866	-2.09705	-0.315869	0.278868	-0.0418917	0.391793
POLS11	0.342692	0.389995	0.438502	0.494817	0.476635	0.449019	0.432833	0.412366	0.385635	0.308695	0.362974	-0.291351	0.36973	0.390398	0.347466	0.336529	0.383183			0.138032	0.12438	0.128426	-0.0367457	-0.0579401	-0.0360462	-0.0472863	-0.0648234	-0.199515	0.175835	-1.80268	-2.26902	0.0559016	-0.109972	-0.031475	0.138632
POLS12	-0.416312	-0.271202	-0.104531	-0.132656	-0.20672	-0.216717	-0.257063	-0.299371	-0.311306	-0.402582	-0.45683	-0.425347	-0.510066	-0.49596	-0.543997	-0.450137	-0.257913			-0.348561	-0.614564	0.269056	0.558321	0.0483568	0.186171	0.16458	0.03987	0.293202	0.13475	-0.0689159	0.199176	-0.0276546	0.0968558	-0.172539	-0.427033
POLS13	-0.441332	-0.330455	-0.230328	-0.142072	-0.203703	-0.255839	-0.347262	-0.346532	-0.38112	-0.394615	-0.354223	-0.274353	-0.303569	-0.351611	-0.0786692	-0.023756	-0.00138297			-0.251233	-0.302997	-0.383176	0.433802	0.255943	0.357345	-0.00210224	0.0998109	0.03541	-0.102357	-0.225482	0.106492	0.158259	-0.776261	-0.698027	-0.941784
POLS14	-0.538055	-0.524	-0.373627	-0.260151	-0.31747	-0.338753	-0.398706	-0.495704	-0.503609	-0.514044	-0.534325	-0.533631	-0.500569	-0.682551	-0.730966	-0.728203	-0.65102			-0.0261215	-0.286972	-0.303714	0.220331	0.0670362	0.176984	0.243282	0.0159459	0.0207217	0.0394537	-0.0012989	-0.0619571	0.36355	0.0709331	-0.00377995	-0.105991
POLS15	-0.725327	-0.674362	-0.702969	-0.699877	-0.70243	-0.72027	-0.737627	-0.753624	-0.765086	-0.767232	-0.769441	-0.694311	-0.654735	-0.722071	-0.733438	-0.744558	-0.637273			-0.0702659	0.0424217	-0.00439948	0.00364801	0.0253973	0.0240987	0.0216867	0.0152094	0.00280501	0.00287948	-0.0976421	-0.0570004	0.102845	0.0157421	0.0151616	-0.144092
POLS16	-0.00385643	0.0648472	0.104859	0.129609	0.114414	0.106388	0.068267	0.0954328	0.0654183	0.0351974	0.0729025	-0.0372559	0.150218	0.117953	0.10161	0.0758093	0.0872619			-17.8154	0.61701	0.236038	-0.117235	-0.0701536	-0.35832	0.397935	-0.314509	-0.461963	1.07124	-1.51104	-5.03207	-0.214789	-0.138557	-0.253918	0.151071
POLS17	0.223378	0.270108	0.399313	0.338088	0.270369	0.275295	0.239948	0.206245	0.180883	0.124453	0.0977117	0.0980438	0.0674843	0.123024	-8.56968e-05	0.0170035	0.184406			0.2092	0.478346	-0.153327	-0.200299	0.0182205	-0.128397	-0.140462	-0.122968	-0.311973	-0.214869	0.00339939	-0.311693	0.823009	-1.0007	-199.415	9.84515
POLS18	0.324872	0.380263	0.45672	0.525636	0.498368	0.470921	0.457801	0.431798	0.41096	0.327999	0.395059	-0.378558	0.479743	0.455628	0.412569	0.418858	0.451978			0.170502	0.201065	0.150892	-0.0518767	-0.0550723	-0.0278602	-0.0568013	-0.0482592	-0.20187	0.204451	-1.95823	-2.26729	-0.050268	-0.0945031	0.0152433	0.0790703
POLS19	-0.0892877	0.0217328	-0.238027	-0.421551	-0.461311	-0.467138	-0.473481	-0.498139	-0.519264	-0.511977	-0.510637	-0.395929	-0.312353	-0.346046	-0.378138	-0.376111	-0.294238			-1.2434	-11.9524	0.771023	0.0943171	0.0126309	0.0135802	0.0520763	0.0424086	-0.014034	-0.00261625	-0.224637	-0.211089	0.107868	0.0927417	-0.00536278	-0.217683
POLS20	0.0653726	0.19553	0.280335	0.369931	0.343246	0.333299	0.31385	0.293608	0.283115	0.251691	0.179847	-0.106134	0.351201	0.290639	0.259391	0.150643	0.338564			1.991	0.433718	0.319605	-0.0721359	-0.028978	-0.0583533	-0.0644967	-0.0357363	-0.110993	-0.285448	-1.59013	-4.30904	-0.172444	-0.107514	-0.419243	1.24746
POLS21	-0.0215093	0.0807995	0.193189	0.406236	0.412259	0.398279	0.35659	0.328404	0.292762	0.291364	0.303177	-0.195595	0.391942	0.348774	0.298539	0.197268	0.304295			-4.75649	1.39096	1.1028	0.0148244	-0.0339106	-0.104671	-0.079043	-0.108532	-0.00477382	0.0405438	-1.64515	-3.00384	-0.110139	-0.144033	-0.339222	0.54255
POLS22	0.040095	0.0970852	0.146013	0.18607	0.159312	0.145429	0.149603	0.133265	0.0990533	0.0997381	0.122561	-0.0297903	0.201218	0.142918	0.103051	0.132856	0.217438			1.42138	0.503963	0.274342	-0.143805	-0.0871442	0.0287041	-0.109214	-0.256717	0.00691332	0.228829	-1.24307	-7.75447	-0.289733	-0.278954	0.289227	0.636645
POLS23	0.111702	0.203823	0.282199	0.333291	0.318326	0.330603	0.326256	0.319078	0.289285	0.285004	0.286201	0.0940106	0.399022	0.355733	0.272028	0.252999	0.345654			0.824715	0.384527	0.181048	-0.0449001	0.0385675	-0.0131499	-0.0220015	-0.0933695	-0.0147985	0.00419932	-0.671523	3.24444	-0.108489	-0.235302	-0.0699513	0.366227
POLS24	-0.0358724	-0.0225426	-0.0343242	0.00700649	-0.00294836	0.00320564	0.00209129	-0.00523421	-0.0164251	-0.0217426	0.000690663	-0.0526206	0.0330104	-0.00483646	0.0104042	0.00200433	0.0302275			-0.371589	0.522636	-1.20413	-1.4208	-2.08727	-0.347623	-3.50286	2.13804	0.323739	-1.03177	-77.1885	-1.62733	-1.14651	-3.15119	-0.807352	14.0811
POLS25	-0.0244479	-0.00550065	-0.0119847	0.0145084	-0.0314506	-0.0142641	-0.0185951	-0.0295683	-0.118266	-0.129724	-0.113543	-0.165122	-0.16317	-0.0108276	-0.00831594	-0.00827553	0.0145623			-0.775006	1.17878	-2.21058	-3.16774	-0.546461	0.303633	0.590108	2.99975	0.0968856	-0.124734	0.454266	-0.0118164	-0.933643	-0.231966	-0.00485883	-2.75968
POLS26	0.0411803	0.133664	0.170738	0.277188	0.244762	0.255195	0.247323	0.227679	0.199058	0.191559	0.192009	0.0276437	0.355722	0.279535	0.2869	0.243227	0.334969			2.24583	0.277367	0.623468	-0.116979	0.0426243	-0.0308471	-0.0794281	-0.125708	-0.0376701	0.00234943	-0.856029	11.8681	-0.214175	0.0263475	-0.152223	0.377186
POLS27	0.0166119	0.0776995	0.147291	0.235587	0.188152	0.177876	0.174243	0.159566	0.131645	0.159581	0.176513	-0.0358531	0.162949	0.156582	0.0766264	0.0780135	0.132022			3.67735	0.895645	0.599467	-0.201348	-0.0546147	-0.0204273	-0.0842306	-0.174981	0.212211	0.106101	-1.20312	-5.54491	-0.0390777	-0.510629	0.0181016	0.692294
POLS28	0.064712	0.114945	0.177852	0.258963	0.224097	0.194017	0.192128	0.183032	0.144622	0.146498	0.16347	-0.0155783	0.214503	0.188973	0.117446	0.138333	0.21516			0.776254	0.547277	0.456061	-0.134639	-0.134227	-0.00973658	-0.0473395	-0.209854	0.0129686	0.115851	-1.0953	-14.7694	-0.119016	-0.378506	0.177846	0.555376
POLS29	0.0325816	0.100624	0.155575	0.234563	0.215502	0.194054	0.174845	0.177567	0.177293	0.142394	0.153834	-0.00161071	0.236066	0.196129	0.18674	0.120746	0.212084			2.08836	0.546103	0.507718	-0.0812624	-0.0995272	-0.098987	0.0155666	-0.00154167	-0.196845	0.0803431	-1.01047	-147.56	-0.169178	-0.0478688	-0.353401	0.756444
POLS30	0.259228	0.344089	0.41054	0.45973	0.417482	0.397594	0.392898	0.366361	0.34085	0.313756	0.320992	0.110732	0.449056	0.434467	0.337689	0.332404	0.429443			0.327362	0.19312	0.119818	-0.0918969	-0.0476387	-0.0118098	-0.0675419	-0.0696355	-0.0794887	0.0230633	-0.655032	3.05533	-0.0324876	-0.22275	-0.0156519	0.291931
POLS31	0.00305191	0.0331491	0.0564533	0.0858068	0.0500675	0.0480136	0.0398275	0.0254418	0.0067915	0.00419542	0.041754	-0.0574612	0.0769405	0.0587872	0.0268549	0.0275403	0.0636231			9.86177	0.703011	0.51996	-0.416509	-0.0410232	-0.170494	-0.361201	-0.733057	-0.382254	8.95228	-2.37618	-2.339	-0.235939	-0.543185	0.0255222	1.31018
POLS32	-0.0141643	0.0198764	0.0570117	0.100486	0.0622066	0.0540567	0.0459142	0.0331499	0.0133952	0.010969	0.0483485	-0.0570708	0.0843655	0.0623866	0.0301733	0.0231144	0.0594831			-2.40327	1.86831	0.762554	-0.380944	-0.131014	-0.150629	-0.278003	-0.595921	-0.181119	3.40772	-2.1804	-2.47826	-0.26052	-0.51635	-0.233945	1.57342
POLS33	-0.0352698	-0.0199996	-0.00933572	0.0221727	0.00080635	-0.000312543	-0.00267455	-0.0117799	-0.0248829	-0.0268545	0.00549359	-0.0559028	0.0385108	0.0229157	0.0101401	0.00245182	0.0275646			-0.432952	-0.533205	-3.37504	-0.963633	-1.3876	7.5574	3.40443	1.11233	0.0792353	-1.20457	-11.176	-1.68889	-0.404954	-0.557505	-0.758205	10.2425
POLS34	0.0366084	0.115942	0.16388	0.243315	0.225958	0.199173	0.203505	0.17368	0.130951	0.117833	0.134439	-0.026868	0.210512	0.183336	0.127797	0.100472	0.162763			2.16709	0.413468	0.484713	-0.0713353	-0.118541	0.0217503	-0.146556	-0.24602	-0.100174	0.140925	-1.19985	-8.83505	-0.129095	-0.302937	-0.213815	0.619982
POLS35		-0.0297381				-0.0288655	-0.0305173	-0.0298205	-0.0297543	-0.0295691	-0.0291776	-0.0304228	-0.0292785	-0.0292111	-0.0286236	-0.0285902	-0.0285882			#DIV/0!	-1	#DIV/0!	#DIV/0!	#DIV/0!	0.0572223	-0.0228313	-0.00222122	-0.00622427	-0.0132397	0.0426754	-0.0376121	-0.00230439	-0.0201115	-0.00116423	-7.27778e-05
PORS1	0.58115	0.55544	0.559425	0.451889	0.576263	0.555674	0.559523	0.567509	0.558806	0.550651	0.55457	0.524388	0.610639	0.640293	0.289787	-0.00845736	0.198312			-0.0442394	0.00717497	-0.192226	0.27523	-0.0357283	0.00692646	0.0142738	-0.0153351	-0.0145951	0.0071172	-0.0544232	0.164478	0.0485635	-0.547416	-1.02918	-24.4485
PORS2	0.178844	0.0903366	0.0878204	0.101706	0.136338	0.0504942	0.0262292	0.0297465	0.00510037	-0.00852339	0.0696557	-0.285873	0.0526066	0.17846	-0.129827	-0.109223	-0.243524			-0.494884	-0.0278545	0.158116	0.340512	-0.629641	-0.480549	0.134099	-0.828539	-2.67113	-9.1723	-5.10409	-1.18402	2.39235	-1.72749	-0.158706	1.22961
PORS3	0.542222	0.514681	0.528855	0.430731	0.542846	0.519163	0.512667	0.52731	0.518542	0.519456	0.532001	0.528384	0.593434	0.600632	0.307598	0.152392	0.294246			-0.0507929	0.0275377	-0.185541	0.260292	-0.0436276	-0.0125138	0.0285633	-0.0166274	0.00176248	0.0241496	-0.00679897	0.123113	0.0121283	-0.487875	-0.504574	0.930847
PORS4	-0.269366	-0.231305	-0.288451	-0.309555	-0.32975	-0.35335	-0.378433	-0.32938	-0.405443	-0.407837	-0.375019	-0.302963	-0.281829	-0.283683	-0.377718	-0.344787	-0.352246			-0.141298	0.247057	0.0731632	0.0652392	0.07157	0.0709861	-0.129623	0.230928	0.00590556	-0.0804672	-0.192141	-0.0697564	0.00657881	0.331478	-0.0871848	0.0216355
PORS5	-0.140869	-0.115749	-0.0998778	-0.137666	-0.171514	-0.172653	-0.188419	-0.17383	-0.20239	-0.19606	-0.18682	-0.160045	-0.135831	-0.128527	-0.155116	-0.128834	-0.138202			-0.178318	-0.137121	0.378345	0.245867	0.00664428	0.0913127	-0.0774286	0.164301	-0.031278	-0.0471284	-0.143321	-0.151296	-0.0537729	0.20688	-0.169434	0.0727131
PORS6	0.036237	0.0463908	0.0854625	0.101267	0.0234517	-0.0519671	-0.179004	-0.307955	-0.31918	-0.332388	-0.258053	0.0849494	-0.124982	0.309835	0.30577	0.171917	0.160462			0.280206	0.842231	0.184926	-0.768416	-3.21592	2.44456	0.720383	0.0364491	0.0413827	-0.22364	-1.32919	-2.47126	-3.47903	-0.0131201	-0.437757	-0.0666312
PORS7	0.230483	0.134175	0.1359	0.150324	0.193456	0.0885504	0.0290209	0.0676581	0.0601294	0.042564	0.0392595	-0.19417	0.22051	0.302594	0.31817	0.0586283	-0.0512138			-0.417852	0.0128555	0.106139	0.286925	-0.542271	-0.672267	1.33136	-0.111275	-0.292127	-0.0776363	-5.9458	-2.13565	0.372248	0.0514767	-0.815733	-1.87353
PORS8	0.168836	0.0931911	0.0509292	0.0783379	0.151503	0.0297523	-0.00561688	0.00605939	-0.0403623	-0.0538436	0.0548519	-0.183869	-0.0520092	0.165007	-0.442403	-0.467611	-0.423708			-0.448038	-0.453498	0.538174	0.933968	-0.803619	-1.18879	-2.07878	-7.66111	0.334008	-2.01873	-4.3521	-0.71714	-4.17266	-3.68111	0.0569791	-0.0938876
PORS9	-0.145661	-0.064216	0.220949	-0.173225	-0.211674	-0.302459	-0.33162	-0.285316	-0.307137	-0.336787	-0.328409	-0.27267	-0.427291	-0.366889	-0.445753	-0.40399	-0.45183			-0.559141	-4.44071	-1.78401	0.221959	0.428894	0.0964128	-0.139631	0.0764811	0.0965374	-0.0248782	-0.169722	0.567058	-0.141358	0.214953	-0.0936908	0.118416
PORS10	0.0172211	0.0304048	0.0670149	0.0543277	0.0060829	-0.125518	-0.242872	-0.257379	-0.298643	-0.316017	-0.297408	-0.377387	-0.396572	-0.322724	-0.260598	-0.362274	-0.402242			0.765558	1.20409	-0.189319	-0.888033	-21.6346	0.934952	0.0597332	0.160325	0.0581765	-0.058886	0.268919	0.0508366	-0.186217	-0.192506	0.390164	0.110325
PORS11	-0.183848	-0.115114	0.039484	-0.0649749	-0.0212488	-0.377432	-0.436395	-0.462111	-0.488245	-0.505992	-0.460975	-0.636034	-0.225247	-0.111544	0.00123271	-0.0990599	-0.255268			-0.373863	-1.343	-2.6456	-0.67297	16.7626	0.156221	0.058927	0.0565534	0.036349	-0.0889677	0.379759	-0.645857	-0.504792	-1.01105	-81.3596	1.5769
PORS12	-0.47753	-0.383693	-0.246954	-0.323473	-0.365185	-0.45221	-0.504344	-0.51375	-0.51867	-0.518561	-0.459821	-0.637264	-0.300242	-0.481545	-0.545896	-0.603436	-0.587745			-0.196505	-0.356377	0.309853	0.12895	0.238304	0.115287	0.0186487	0.00957673	-0.000210057	-0.113275	0.385896	-0.528858	0.603859	0.133633	0.105405	-0.0260021
[truncated: 1,003 more rows]

## Sheet: GVCFDI
No.	Sector	2008	2009	2010	2011	2012	2013	2014	2015	2016	2017	2018	2019	2020	2021	2022	2023
[truncated: 2,205 more rows]
