# Supplementary material for: Is China decoupling from the global value chain? A quantitative analysis framework based on the global production network
Source: Research Square preprint supplement (doi:10.21203/rs.3.rs-5355384/v1), 2025-04-10
Supplement: Supplementary file 4 [file d9bce9456a182f6ff2bae91e.xlsx]

## Sheet: FISC和GVCFDI
Sector	2017	2018	2019	2020	2021	2022	2023				2018	2019	2020	2021	2022	2023
AUSS1	0.234696	0.221648	0.294339	0.313433	0.327007	0.340338	0.277676				-0.0555969	0.327961	0.0648695	0.0433088	0.040765	-0.184117
AUSS2	-0.844765	-0.810592	-0.826784	-0.822093	-0.796074	-0.781109	-0.796645				-0.040452	0.0199758	-0.00567444	-0.0316502	-0.0187981	0.0198899
AUSS3	-0.104279	-0.0910032	-0.066336	-0.0668438	-0.0583353	-0.0488381	-0.0569499				-0.127314	-0.271059	0.0076551	-0.12729	-0.162803	0.166096
AUSS4	-0.144685	-0.478859	-0.155723	-0.149661	-0.14169	-0.138925	-0.137952				2.30966	-0.674804	-0.0389253	-0.0532583	-0.0195174	-0.00700538
AUSS5	-0.0312533	-0.186752	-0.0366737	-0.0723294	-0.0341554	0.00253588	-0.0163173				4.97543	-0.803623	0.97224	-0.52778	-1.07425	-7.43457
AUSS6	-0.335578	-0.342874	-0.334344	-0.342648	-0.315715	-0.311746	-0.317619				0.0217411	-0.0248768	0.0248372	-0.0786043	-0.0125709	0.0188409
AUSS7	-0.311549	-0.168003	-0.16219	-0.162463	-0.16085	-0.165604	-0.159261				-0.460749	-0.034604	0.00168641	-0.00993154	0.0295603	-0.0383012
AUSS8	-0.488889	-0.449933	-0.423933	-0.386511	-0.314245	-0.330914	-0.319015				-0.0796812	-0.057787	-0.0882732	-0.18697	0.0530435	-0.0359577
AUSS9	-0.210429	-0.209144	-0.193505	-0.185398	-0.168506	-0.173569	-0.178778				-0.00610788	-0.0747774	-0.0418947	-0.0911132	0.0300465	0.0300156
AUSS10	-0.297681	-0.314626	-0.310333	-0.308985	-0.290685	-0.286362	-0.288264				0.0569234	-0.0136437	-0.00434278	-0.0592267	-0.014871	0.00663863
AUSS11	-0.338658	-0.348265	-0.336531	-0.347537	-0.313414	-0.308881	-0.317162				0.0283681	-0.0336921	0.0327056	-0.0981853	-0.0144647	0.0268108
AUSS12	-0.341373	-0.344653	-0.379974	-0.343713	-0.386048	-0.294918	-0.306702				0.00960704	0.102484	-0.0954309	0.123169	-0.236058	0.0399563
AUSS13	-0.343633	-0.304494	-0.294224	-0.327822	-0.291617	-0.287313	-0.282965				-0.113899	-0.0337261	0.11419	-0.110441	-0.0147566	-0.0151357
AUSS14	-0.240569	-0.213279	-0.204628	-0.215174	-0.203992	-0.195646	-0.195139				-0.113442	-0.0405579	0.051534	-0.0519658	-0.0409159	-0.00258662
AUSS15	-0.0924111	-0.0613275	-0.0605793	-0.0749931	-0.107795	-0.0983319	-0.0896883				-0.336363	-0.0121992	0.237932	0.4374	-0.0877879	-0.0879027
AUSS16	-0.21404	-0.208426	-0.215716	-0.204696	-0.194286	-0.195248	-0.195596				-0.0262329	0.0349805	-0.0510866	-0.0508576	0.00495406	0.00178055
AUSS17	-0.555035	-0.475382	-0.447174	-0.449761	-0.359594	-0.376212	-0.37485				-0.143511	-0.0593378	0.00578565	-0.200478	0.0462126	-0.00362025
AUSS18	-0.41538	-0.429685	-0.425091	-0.432763	-0.393669	-0.389884	-0.402674				0.0344392	-0.0106931	0.0180488	-0.0903348	-0.00961623	0.0328052
AUSS19	-0.206452	-0.256539	-0.193817	-0.201026	-0.185041	-0.180908	-0.182519				0.242611	-0.244493	0.0371944	-0.0795201	-0.0223315	0.00890486
AUSS20	-0.333921	-0.328257	-0.316509	-0.326238	-0.271684	-0.277013	-0.278559				-0.0169623	-0.0357908	0.03074	-0.167221	0.0196144	0.00557956
AUSS21	-0.426313	-0.451569	-0.430427	-0.461914	-0.394197	-0.407889	-0.409566				0.0592414	-0.0468192	0.0731532	-0.1466	0.0347337	0.00411223
AUSS22	-0.222014	-0.208598	-0.200817	-0.208209	-0.1897	-0.18278	-0.184582				-0.0604324	-0.0372996	0.0368117	-0.0888976	-0.0364811	0.00986018
AUSS23	-0.322647	-0.420098	-0.302832	-0.303841	-0.278508	-0.279937	-0.277742				0.302036	-0.27914	0.00333375	-0.0833759	0.00513059	-0.00784087
AUSS24	-0.165291	-0.170836	-0.176348	-0.154154	-0.14	-0.135679	-0.144545				0.0335425	0.0322694	-0.125856	-0.0918144	-0.0308685	0.0653466
AUSS25	-0.185983	-0.177283	-0.175631	-0.171131	-0.0955218	-0.122334	-0.122616				-0.0467779	-0.00931699	-0.0256259	-0.44182	0.280689	0.00230962
AUSS26	-0.223099	-0.215751	-0.202204	-0.213082	-0.182132	-0.161368	-0.165905				-0.032936	-0.0627898	0.0537964	-0.145252	-0.114001	0.0281131
AUSS27	-0.199421	-0.202152	-0.196892	-0.203698	-0.169655	-0.169937	-0.170709				0.0136958	-0.0260202	0.0345655	-0.167128	0.00166505	0.00454382
AUSS28	-0.136962	-0.187406	-0.168884	-0.247872	-0.185986	-0.184126	-0.19762				0.36831	-0.0988373	0.467709	-0.249668	-0.00999979	0.0732833
AUSS29	-0.132035	-0.14077	-0.134329	-0.150229	-0.0898513	-0.0884481	-0.0971197				0.0661551	-0.0457544	0.118371	-0.401905	-0.0156172	0.0980414
AUSS30	-0.0303931	-0.088211	-0.0746212	-0.100718	0.00738285	-0.000812939	-0.0108389				1.90234	-0.15406	0.349722	-1.0733	-1.11011	12.3329
AUSS31	-0.223365	-0.212072	-0.203335	-0.210371	-0.189986	-0.183082	-0.184319				-0.0505603	-0.0411982	0.0346023	-0.0969008	-0.0363363	0.00675254
AUSS32	-0.176593	-0.712581	-0.0988704	-0.312638	-0.10121	-0.0909883	-0.10742				3.03516	-0.86125	2.1621	-0.67627	-0.100998	0.180595
AUSS33	-0.232807	-0.209163	-0.190223	-0.197024	-0.185451	-0.17859	-0.181164				-0.101561	-0.0905489	0.0357494	-0.0587378	-0.0369954	0.0144137
AUSS34	-0.221587	-0.211964	-0.203104	-0.21494	-0.183978	-0.17828	-0.18031				-0.0434263	-0.0417987	0.0582742	-0.144048	-0.0309701	0.011386
AUSS35	-0.0725843	-0.0656552	-0.0668967	-0.0552933	-0.0478215	-0.0486437	-0.0603386				-0.095462	0.0189088	-0.173453	-0.13513	0.017194	0.240418
AUTS1	0.400765	0.292201	-0.0413821	0.320302	0.336836	0.220015	0.288547				-0.270891	-1.14162	-8.74012	0.0516177	-0.346817	0.311484
AUTS2	-0.170324	-0.0706513	-0.0908679	-0.139937	-0.143794	-0.172299	-0.166091				-0.585195	0.286146	0.540005	0.0275607	0.198241	-0.0360353
AUTS3	0.218292	0.140051	-0.250329	0.160662	0.112299	0.1388	0.136833				-0.358426	-2.78742	-1.6418	-0.301026	0.235991	-0.0141695
AUTS4	-0.315452	-0.175062	-0.113359	-0.128869	-0.113731	-0.109395	-0.150016				-0.445044	-0.352462	0.13682	-0.117467	-0.0381264	0.371322
AUTS5	-0.0919953	-0.108335	-0.0808184	-0.080112	-0.0750914	-0.0636381	-0.0630584				0.17761	-0.253993	-0.00874085	-0.0626693	-0.152525	-0.00910964
AUTS6	0.0494843	0.108415	0.0224729	0.170546	0.0773838	0.00363086	0.100777				1.19091	-0.792715	6.58899	-0.54626	-0.95308	26.7557
AUTS7	-0.470266	-0.00587639	-0.125298	0.0855097	-0.00446591	0.0128671	-0.0578704				-0.987504	20.3223	-1.68245	-1.05223	-3.88118	-5.49754
AUTS8	-0.294732	-0.120016	-0.0773844	-0.057947	-0.0864917	-0.0765611	-0.0754422				-0.592798	-0.355214	-0.25118	0.492599	-0.114815	-0.0146149
AUTS9	-0.612497	-0.65345	-0.710213	-0.76833	-0.757559	-0.722265	-0.585713				0.0668611	0.086868	0.0818296	-0.0140182	-0.0465898	-0.18906
AUTS10	-0.342907	-0.387528	-0.31728	-0.392268	-0.404519	-0.365847	-0.345327				0.130125	-0.181272	0.236346	0.0312307	-0.0955988	-0.0560899
AUTS11	-0.143921	-0.280525	0.0773604	0.228761	0.170855	0.149573	0.165924				0.949164	-1.27577	1.95708	-0.253129	-0.124561	0.109318
AUTS12	-0.676416	-0.654358	-0.596348	-0.61545	-0.683443	-0.697945	-0.645441				-0.0326113	-0.0886516	0.0320317	0.110477	0.0212186	-0.0752266
AUTS13	-0.619332	-0.585074	-0.594401	-0.56952	-0.573833	-0.582593	-0.478227				-0.0553151	0.0159426	-0.041859	0.00757212	0.0152662	-0.179141
AUTS14	-0.57352	-0.556531	-0.558568	-0.715184	-0.781286	-0.659393	-0.622036				-0.0296222	0.00365964	0.280389	0.0924268	-0.156016	-0.0566533
AUTS15	-0.780965	-0.756111	-0.759773	-0.782012	-0.79273	-0.786643	-0.696606				-0.0318253	0.00484354	0.0292706	0.0137063	-0.00767934	-0.114457
AUTS16	-0.215468	-0.215377	-0.17245	-0.195663	-0.206518	-0.21805	-0.207197				-0.000422839	-0.199312	0.134611	0.0554746	0.0558431	-0.0497728
AUTS17	-0.336048	-0.332225	-0.259844	-0.27412	-0.342043	-0.344114	-0.290874				-0.011376	-0.217868	0.0549418	0.247785	0.00605686	-0.154719
AUTS18	0.28059	0.253792	0.112567	0.310814	0.249054	0.268919	0.260824				-0.0955074	-0.556461	1.76116	-0.198703	0.0797579	-0.030102
AUTS19	-0.490836	-0.471063	-0.499543	-0.467661	-0.465902	-0.443182	-0.287321				-0.040285	0.0604595	-0.063822	-0.00376184	-0.048766	-0.351686
AUTS20	-0.187078	-0.12438	-0.135895	-0.0616429	-0.239136	-0.124609	-0.124849				-0.335144	0.0925794	-0.546392	2.87938	-0.478918	0.00192507
AUTS21	-0.0386438	-0.047625	-0.127825	-0.00413189	-0.0567023	-0.0434155	-0.0617137				0.23241	1.684	-0.967676	12.7231	-0.234326	0.421466
AUTS22	0.000485013	0.0132507	-0.122864	0.0673075	-0.0217954	0.0259291	0.0169736				26.3202	-10.2723	-1.54782	-1.32382	-2.18966	-0.345383
AUTS23	-0.155205	-0.217916	-0.116764	-0.0800403	-0.171761	-0.112854	-0.109154				0.404054	-0.464178	-0.314514	1.14593	-0.342958	-0.0327876
AUTS24	-0.0961098	-0.0868248	-0.0844991	-0.0437056	-0.0432348	-0.0466004	-0.0499039				-0.0966088	-0.0267855	-0.482769	-0.0107713	0.0778451	0.0708889
AUTS25	-0.058071	-0.0549055	-0.12146	-0.0398879	-0.0675617	-0.0589612	-0.0636728				-0.0545105	1.21216	-0.671595	0.69379	-0.127299	0.0799097
AUTS26	-0.0461686	-0.0597949	0.0491903	0.0458017	-0.070775	-0.0462495	-0.0373537				0.295143	-1.82265	-0.0688877	-2.54525	-0.346528	-0.192343
AUTS27	-0.0265311	-0.0331058	-0.131932	0.0222182	-0.0406888	-0.0336238	-0.0420705				0.247813	2.98515	-1.16841	-2.83133	-0.173635	0.251212
AUTS28	0.200273	0.138166	-0.0321887	0.218252	0.143864	0.145591	0.130618				-0.310109	-1.23297	-7.7804	-0.340836	0.0120012	-0.10284
AUTS29	0.284551	0.224692	0.0698551	0.318112	0.235616	0.242481	0.21105				-0.21036	-0.689108	3.55387	-0.25933	0.0291388	-0.129623
AUTS30	0.196151	0.184016	-0.0838692	0.280952	0.170051	0.155933	0.135634				-0.0618623	-1.45577	-4.34988	-0.394731	-0.0830263	-0.130175
AUTS31	-0.0580438	-0.0556825	-0.103223	-0.0380855	-0.0689677	-0.0602413	-0.0670677				-0.0406813	0.853773	-0.631036	0.810867	-0.126529	0.113317
AUTS32	-0.0568773	-0.0554603	-0.104015	-0.0380631	-0.06878	-0.0603449	-0.066886				-0.0249143	0.875486	-0.634061	0.806998	-0.122639	0.108396
AUTS33	-0.0553532	-0.0411396	-0.0604434	-0.0402447	-0.0485021	-0.0445692	-0.111112				-0.256779	0.469226	-0.334175	0.205179	-0.0810877	1.49303
AUTS34	-0.204434	-0.187064	-0.0602008	0.0153976	-0.141953	-0.165469	-0.168394				-0.0849651	-0.678181	-1.25577	-10.2192	0.165657	0.0176765
AUTS35	-0.0290284	-0.0316283	-0.0316185	-0.0313994	-0.0316019	-0.0295259	-0.0291728				0.0895673	-0.000309999	-0.00693178	0.00645063	-0.0656919	-0.0119601
BELS1	0.188874	-0.306859	-0.344949	-0.331943	-0.303834	-0.325357	-0.325519				-2.62468	0.124131	-0.0377042	-0.0846817	0.0708378	0.000500303
BELS2	-0.11468	-0.186094	-0.228073	-0.228124	-0.228095	-0.249826	-0.154963				0.622733	0.225576	0.000225434	-0.000126603	0.0952691	-0.379717
BELS3	0.115511	-0.0736201	-0.00382437	0.0484888	-0.00647239	-0.137544	-0.155107				-1.63734	-0.948053	-13.6789	-1.13348	20.2509	0.127692
BELS4	-0.195694	-0.162018	-0.138893	-0.143179	-0.135358	-0.157324	-0.206419				-0.172086	-0.142731	0.0308614	-0.0546296	0.162281	0.312066
BELS5	-0.0390558	-0.0311729	-0.0371979	-0.0302966	-0.0526065	-0.0520799	-0.0491246				-0.201838	0.193277	-0.185527	0.736382	-0.0100103	-0.0567461
BELS6	-0.065361	-0.269437	-0.138206	-0.190291	-0.136469	-0.192584	-0.134561				3.12229	-0.487057	0.376867	-0.282843	0.411196	-0.301284
BELS7	-0.074751	-0.183264	-0.169668	-0.172644	-0.171817	-0.2275	-0.175749				1.45165	-0.0741867	0.0175405	-0.00478853	0.32408	-0.227477
BELS8	-0.603267	-0.648457	-0.553317	-0.4825	-0.528867	-0.503836	-0.608161				0.0749097	-0.146717	-0.127987	0.0960978	-0.0473303	0.207062
BELS9	-0.672607	-0.737328	-0.692293	-0.701458	-0.67407	-0.716066	-0.739832				0.0962241	-0.0610786	0.0132396	-0.0390455	0.0623032	0.0331894
BELS10	-0.233783	-0.401355	-0.411133	-0.348261	-0.284182	-0.332517	-0.334554				0.716784	0.0243624	-0.152924	-0.183996	0.170085	0.00612458
BELS11	0.0538077	-0.341494	-0.0849795	-0.169973	-0.080612	-0.162762	-0.0693774				-7.34657	-0.751154	1.00016	-0.525735	1.01907	-0.573749
BELS12	-0.666921	-0.676914	-0.646213	-0.645443	-0.672909	-0.710847	-0.689023				0.0149834	-0.045354	-0.00119148	0.0425537	0.0563787	-0.0307018
BELS13	-0.106507	-0.179737	-0.190044	-0.160304	-0.162803	-0.214424	-0.394595				0.687561	0.0573498	-0.156492	0.0155878	0.317081	0.840252
BELS14	-0.24295	-0.291723	-0.254372	-0.294006	-0.312382	-0.29502	-0.238713				0.200752	-0.128034	0.155809	0.0625016	-0.0555792	-0.190858
BELS15	-0.375162	-0.373186	-0.408595	-0.345142	-0.354664	-0.424402	-0.383799				-0.00526882	0.0948832	-0.155296	0.0275899	0.196632	-0.0956709
BELS16	-0.162193	-0.328045	-0.437142	-0.447552	-0.389603	-0.208224	-0.175812				1.02256	0.332565	0.0238139	-0.129481	-0.465548	-0.155656
BELS17	-0.514094	-0.72201	-0.504264	-0.418531	-0.53016	-0.523046	-0.521462				0.404433	-0.301584	-0.170016	0.266717	-0.0134184	-0.0030288
BELS18	0.0647044	-0.456512	-0.0585417	-0.207347	-0.122755	-0.243441	-0.133732				-8.05534	-0.871763	2.54187	-0.407975	0.983146	-0.45066
BELS19	-0.105626	-0.447157	-0.152395	-0.173421	-0.187049	-0.270362	-0.192069				3.23341	-0.659191	0.137969	0.0785823	0.445411	-0.289586
BELS20	0.0841041	-0.174755	0.0488437	-0.0613582	0.00939501	-0.126768	-0.0205698				-3.07784	-1.2795	-2.25621	-1.15312	-14.4931	-0.837737
BELS21	0.0985768	-0.207397	0.00343684	-0.113333	-0.0641448	-0.114036	-0.0349747				-3.10391	-1.01657	-33.9758	-0.434013	0.777793	-0.693302
BELS22	-0.0525875	-0.192372	-0.152545	-0.19152	-0.205808	-0.327288	-0.202731				2.65813	-0.207031	0.255498	0.0746043	0.590261	-0.380573
BELS23	0.0798915	-0.266907	0.104097	0.0313184	0.026041	-0.0708811	-0.0147763				-4.34087	-1.39001	-0.699142	-0.168508	-3.7219	-0.791534
BELS24	-0.216245	-0.297429	-0.343267	-0.257998	-0.292395	-0.337897	-0.130174				0.375426	0.154116	-0.248405	0.133324	0.155618	-0.614752
BELS25	-0.0880653	-0.115154	-0.130938	-0.0995678	-0.0926604	-0.113274	-0.111957				0.307595	0.137067	-0.239578	-0.0693744	0.222463	-0.011629
BELS26	0.0284118	-0.677741	0.186038	0.0480512	0.0185991	0.0484352	0.118248				-24.8542	-1.2745	-0.741713	-0.612932	1.60417	1.44137
BELS27	-0.0344494	-0.193846	-0.156136	-0.180899	-0.196279	-0.297701	-0.200376				4.62698	-0.194535	0.158598	0.0850212	0.516721	-0.326921
BELS28	0.183322	-0.0644047	0.0229568	-0.0658597	-0.106858	-0.331896	-0.0848433				-1.35132	-1.35645	-3.86886	0.622511	2.10595	-0.744368
BELS29	0.0875474	-0.123365	-0.0548097	-0.109334	-0.158546	-0.337008	-0.14284				-2.40912	-0.555709	0.99479	0.450108	1.12561	-0.576153
BELS30	0.246743	-0.0455031	0.038501	-0.0625773	-0.0861386	-0.393115	-0.0379455				-1.18442	-1.84612	-2.62534	0.376514	3.56375	-0.903475
BELS31	-0.203796	-0.165417	-0.161707	-0.446705	-0.261238	-0.202641	-0.17181				-0.188325	-0.0224272	1.76244	-0.415188	-0.224304	-0.152149
BELS32	-0.105273	-0.180632	-0.170092	-0.174236	-0.172223	-0.227177	-0.184536				0.715842	-0.0583489	0.0243628	-0.0115525	0.319086	-0.187697
BELS33	-0.0835518	-0.0955248	-0.101314	-0.0864354	-0.0846947	-0.101485	-0.0972631				0.1433	0.0606025	-0.146855	-0.0201393	0.198247	-0.0416029
BELS34	0.0212295	-0.171418	-0.114721	-0.163046	-0.180044	-0.316528	-0.175275				-9.07454	-0.330752	0.421235	0.104249	0.758062	-0.446256
BELS35	-0.0293536	-0.0345112	-0.0360768	-0.0305273	-0.0303011	-0.0297892	-0.0293413				0.175708	0.0453649	-0.153824	-0.00741244	-0.0168931	-0.0150361
BGRS1	-0.422573	-0.201528	-0.480928	-0.365525	-0.353215	-0.615154	-0.52355				-0.523093	1.38641	-0.239959	-0.0336774	0.741584	-0.148912
BGRS2	-0.641381	-0.712769	-0.429284	-0.673425	-0.576612	-0.660169	-0.565685				0.111304	-0.397724	0.568718	-0.143763	0.14491	-0.143121
BGRS3	-0.238745	-0.235496	-0.225397	-0.204097	-0.225471	-0.246597	-0.130613				-0.0136106	-0.0428802	-0.0945013	0.104722	0.0936971	-0.470336
BGRS4	-0.163751	-0.386526	-0.157168	-0.203954	-0.20418	-0.10881	-0.0891949				1.36045	-0.593383	0.297681	0.00110825	-0.467086	-0.180272
BGRS5	-0.0993321	-0.274662	-0.335712	-0.369838	-0.266035	-0.24191	-0.237751				1.76509	0.222271	0.101652	-0.280671	-0.0906811	-0.0171936
BGRS6	-0.365373	-0.282204	-0.200498	-0.197005	-0.218864	-0.180841	-0.138516				-0.227628	-0.289527	-0.0174215	0.110957	-0.173731	-0.234044
BGRS7	-0.225558	-0.251472	-0.0855225	-0.085988	-0.0874575	-0.0959098	-0.0580842				0.114888	-0.659913	0.00544309	0.0170892	0.0966449	-0.394387
BGRS8	-0.398236	-0.539209	-0.519524	-0.117072	-0.0797247	-0.0927746	-0.0280699				0.353995	-0.0365073	-0.774655	-0.319013	0.163687	-0.69744
BGRS9	-0.270075	-0.27955	-0.124675	-0.129641	-0.0914528	-0.179026	-0.222666				0.0350816	-0.554015	0.0398286	-0.294567	0.957573	0.243764
BGRS10	-0.130469	-0.24576	-0.180986	-0.204636	-0.17479	-0.105649	-0.0510711				0.883667	-0.263566	0.130672	-0.14585	-0.395565	-0.516597
BGRS11	-0.345631	-0.17835	-0.460476	-0.185501	-0.150949	-0.348651	-0.164387				-0.483987	1.58186	-0.597155	-0.186263	1.30973	-0.528507
BGRS12	-0.760228	-0.827234	-0.753771	-0.770572	-0.73679	-0.753127	-0.654702				0.0881404	-0.0888054	0.0222891	-0.04384	0.0221726	-0.130688
BGRS13	-0.434079	-0.527619	-0.498876	-0.495588	-0.411932	-0.331844	-0.322077				0.21549	-0.0544774	-0.00658895	-0.168802	-0.194421	-0.0294331
BGRS14	-0.445687	-0.562611	-0.488614	-0.561443	-0.534531	-0.54458	-0.404101				0.262346	-0.131524	0.149051	-0.0479333	0.0187996	-0.257958
BGRS15	-0.405285	-0.579958	-0.53537	-0.568514	-0.52647	-0.498413	-0.37459				0.430989	-0.0768813	0.0619087	-0.0739535	-0.0532936	-0.248434
BGRS16	-0.0720634	-0.15129	-0.118361	-0.0736396	-0.0951256	-0.0461552	-0.11256				1.0994	-0.217651	-0.377841	0.291772	-0.514797	1.43873
BGRS17	-0.300175	-0.387891	-0.309309	-0.32326	-0.196633	-0.301598	-0.143371				0.292217	-0.20259	0.0451061	-0.391718	0.533808	-0.524628
BGRS18	-0.0658564	-0.0567943	-0.0851974	-0.208926	-0.152915	-0.0577512	0.0128184				-0.137605	0.500104	1.45226	-0.268091	-0.622331	-1.22196
BGRS19	-0.0547511	-0.0227671	-0.0350387	-0.126717	-0.0685823	-0.0879705	-0.0087158				-0.584171	0.539007	2.61649	-0.458777	0.2827	-0.900924
BGRS20	-0.268531	-0.279532	-0.203121	-0.198914	-0.192029	-0.229104	-0.05108				0.0409693	-0.273356	-0.0207119	-0.0346129	0.193073	-0.777045
BGRS21	-0.271512	-0.299675	-0.249358	-0.237316	-0.256208	-0.264716	-0.181047				0.103726	-0.167906	-0.0482925	0.0796101	0.0332066	-0.316072
BGRS22	-0.0901956	-0.111206	-0.0660306	-0.0556009	-0.055887	-0.0540269	-0.0484119				0.232941	-0.406231	-0.157953	0.00514591	-0.0332827	-0.103929
BGRS23	0.0327368	0.0758583	0.0305716	-0.100619	-0.032325	-0.0844961	0.0488913				1.31722	-0.596991	-4.29127	-0.67874	1.61396	-1.57862
BGRS24	-0.15716	-0.213307	-0.191548	-0.173122	-0.151479	-0.158779	-0.155003				0.357254	-0.102004	-0.0961997	-0.125012	0.0481869	-0.023777
BGRS25	-0.375098	-0.181643	-0.170017	-0.0977845	-0.0805856	-0.0657224	-0.0368848				-0.515744	-0.0640054	-0.424856	-0.175886	-0.18444	-0.438779
BGRS26	-0.0490807	0.0765045	-0.0289318	-0.0352077	-0.0853409	-0.132631	0.0030914				-2.55875	-1.37817	0.216921	1.42393	0.554134	-1.02331
BGRS27	-0.244051	-0.273104	-0.0312505	-0.0717607	-0.0825618	-0.0987578	-0.0503812				0.119047	-0.885573	1.2963	0.150515	0.196168	-0.489851
BGRS28	0.0283389	-0.00100559	0.00442026	-0.0605132	0.000486902	-0.0401054	0.0750464				-1.03548	-5.39571	-14.69	-1.00805	-83.3685	-2.87123
BGRS29	-0.204786	-0.208901	0.12726	0.11009	0.0681674	0.00368428	0.0937899				0.0200965	-1.60919	-0.134926	-0.380801	-0.945953	24.4568
BGRS30	-0.37387	-0.415552	0.108191	0.107081	0.0693789	0.00895172	0.153666				0.111487	-1.26036	-0.0102658	-0.352088	-0.870973	16.1661
BGRS31	-0.119176	-0.118061	-0.109043	-0.103489	-0.0899877	-0.0877052	-0.0798246				-0.00935639	-0.0763897	-0.0509346	-0.130458	-0.0253652	-0.0898531
BGRS32	-0.134686	-0.184485	-0.0292727	-0.0436901	-0.0536944	-0.045328	-0.0191375				0.369744	-0.841327	0.492522	0.228981	-0.155814	-0.577801
BGRS33	0.0733074	-0.00898147	0.0308265	0.0126761	0.0266185	0.0709507	0.125316				-1.12252	-4.43223	-0.588793	1.0999	1.66547	0.76624
BGRS34	-0.11539	-0.180351	0.101242	0.0390363	0.0319885	-0.00210339	0.0582908				0.562963	-1.56136	-0.614428	-0.180544	-1.06575	-28.7128
BGRS35											#DIV/0!	#DIV/0!	#DIV/0!	#DIV/0!	#DIV/0!	#DIV/0!
BRAS1	-0.221645	-0.322243	-0.183282	-0.360971	-0.410384	-0.190294	-0.324236				0.453871	-0.431229	0.969479	0.13689	-0.536304	0.703871
BRAS2	0.0247044	-0.478802	-0.562615	-0.535978	-0.607518	-0.430281	-0.394377				-20.3812	0.175046	-0.0473452	0.133477	-0.29174	-0.083444
BRAS3	0.0253856	-0.0975957	0.085956	-0.306446	-0.308652	-0.127472	-0.246554				-4.84453	-1.88074	-4.56515	0.0071968	-0.587003	0.934182
BRAS4	0.0702146	0.0134774	-0.0276253	-0.000289705	-0.154037	-0.0940357	0.00321638				-0.808054	-3.04975	-0.989513	530.704	-0.389527	-1.0342
BRAS5	-0.225313	-0.191632	-0.182642	-0.192992	-0.143785	-0.0998107	-0.0633139				-0.149485	-0.0469102	0.0566683	-0.25497	-0.305834	-0.36566
BRAS6	0.172507	0.0527507	0.0414889	0.0354201	-0.048069	-0.0480656	0.00232006				-0.694211	-0.213491	-0.146274	-2.35711	-6.93227e-05	-1.04827
BRAS7	0.354031	0.102097	0.0243311	0.0309837	-0.136845	-0.0182273	0.0393879				-0.711617	-0.761686	0.273421	-5.41669	-0.866804	-3.16093
BRAS8	0.119811	0.105105	0.0741265	-0.069937	-0.169478	-0.0443102	-0.0962659				-0.122742	-0.294737	-1.94348	1.42329	-0.738549	1.17255
BRAS9	-0.326583	-0.413829	-0.309812	-0.453768	-0.448333	-0.259606	-0.401421				0.267146	-0.251354	0.464658	-0.0119772	-0.420952	0.546267
BRAS10	0.070872	-0.0526168	0.0948807	-0.168065	-0.148336	-0.0489909	-0.142356				-1.74242	-2.80324	-2.77132	-0.117387	-0.66973	1.90576
BRAS11	0.223379	0.18224	0.184225	0.00226416	-0.137223	0.00571155	-0.05201				-0.18417	0.0108923	-0.98771	-61.6068	-1.04162	-10.1061
BRAS12	0.466892	0.325414	0.256708	0.19659	-0.167747	-0.0449623	0.0853916				-0.303021	-0.211134	-0.23419	-1.85328	-0.731963	-2.89918
BRAS13	-0.0656976	-0.253407	-0.269147	-0.267407	-0.351281	-0.30938	-0.28045				2.85717	0.0621145	-0.00646404	0.313655	-0.119279	-0.0935093
BRAS14	0.182869	0.00912951	-0.0257702	-0.0254051	-0.0985978	-0.0516369	-0.024004				-0.950076	-3.82273	-0.0141663	2.88103	-0.476288	-0.535138
BRAS15	0.143981	-0.0150368	-0.0580759	-0.0654705	-0.120149	-0.0672904	-0.0557597				-1.10444	2.86224	0.127326	0.83517	-0.439945	-0.171357
BRAS16	0.199355	0.00529058	-0.0225512	-0.0247725	-0.209306	-0.176735	-0.0928157				-0.973461	-5.26251	0.0985041	7.4491	-0.155611	-0.474833
BRAS17	0.240274	0.100872	0.0338926	0.0494147	-0.115853	-0.0406814	0.0168027				-0.58018	-0.664004	0.457981	-3.3445	-0.648853	-1.41303
BRAS18	0.25272	0.0309332	-0.0134156	-0.013194	-0.190149	-0.152886	-0.0684713				-0.877599	-1.4337	-0.0165143	13.4118	-0.195971	-0.55214
BRAS19	0.0781419	-0.0422016	-0.0625469	-0.137757	-0.101236	-0.103677	-0.155956				-1.54006	0.4821	1.20246	-0.265113	0.0241082	0.504257
BRAS20	0.0884255	0.107893	0.180378	-0.0692094	-0.211327	0.0698457	-0.0804258				0.220162	0.671814	-1.38369	2.05344	-1.33051	-2.15148
BRAS21	0.183818	0.16818	0.242106	-0.0341706	-0.190535	0.126936	-0.0331676				-0.0850695	0.43956	-1.14114	4.57598	-1.66621	-1.26129
BRAS22	0.307275	0.0510883	0.00533383	-0.00156628	-0.101705	-0.0336839	0.00485887				-0.833738	-0.895596	-1.29365	63.9341	-0.668808	-1.14425
BRAS23	0.248199	0.0110503	-0.109047	-0.133296	-0.353038	-0.239273	-0.169917				-0.955478	-10.8683	0.222366	1.64853	-0.322246	-0.28986
BRAS24	-0.0826642	-0.208048	-0.224717	-0.244183	-0.277862	-0.218022	-0.221912				1.51678	0.0801216	0.0866251	0.137926	-0.215358	0.0178403
BRAS25	0.255512	0.0172503	-0.0143064	-0.021089	-0.0731048	-0.0374576	-0.0120385				-0.932487	-1.82935	0.474088	2.4665	-0.487617	-0.67861
BRAS26	0.127858	-0.233014	-0.295003	-0.303087	-0.406608	-0.314322	-0.277871				-2.82244	0.266034	0.0274024	0.341556	-0.226967	-0.115964
BRAS27	0.279696	0.0552357	-0.00681002	-0.00999307	-0.125806	-0.0531168	-0.0134107				-0.802515	-1.12329	0.467406	11.5893	-0.577788	-0.747525
BRAS28	0.420572	0.166405	0.0988494	0.104914	-0.116587	0.0360563	0.09294				-0.604336	-0.405971	0.0613543	-2.11126	-1.30927	1.57763
BRAS29	0.294926	0.0978049	0.0243441	0.0303969	-0.129268	-0.0284957	0.0174978				-0.668375	-0.751095	0.248632	-5.25267	-0.779561	-1.61405
BRAS30	0.585541	0.332455	0.224777	0.240545	-0.10971	0.143487	0.218757				-0.432226	-0.323887	0.0701509	-1.45609	-2.30788	0.524571
BRAS31	0.113706	0.00422886	-0.00991617	-0.0109105	-0.0195194	-0.0139097	0.00324227				-0.962809	-3.34488	0.100278	0.789038	-0.287388	-1.23309
BRAS32	0.203214	0.0255345	-0.0225636	-0.023895	-0.0977739	-0.0536254	-0.0233473				-0.874347	-1.88365	0.0590086	3.09181	-0.451537	-0.564622
BRAS33	-0.0108666	-0.0137984	-0.0132372	-0.0174931	-0.0189597	-0.00823576	-0.0113244				0.269798	-0.0406676	0.321507	0.0838422	-0.565618	0.375022
BRAS34	0.484274	0.211522	0.135543	0.166011	-0.103698	0.0490482	0.123182				-0.563219	-0.359203	0.224787	-1.62465	-1.47299	1.51145
BRAS35	-0.0286114	-0.0289829	-0.0288629	-0.0286236	-0.0285694	-0.028497	-0.0285195				0.012987	-0.00414255	-0.00829065	-0.00189248	-0.00253435	0.000790257
CANS1	0.111438	-0.458545	-0.399554	-0.124572	-0.206188	-0.13945	-0.247198				-5.1148	-0.128648	-0.688223	0.655178	-0.323677	0.772667
CANS2	-0.704166	-0.808892	-0.799009	-0.752371	-0.788125	-0.838299	-0.828566				0.148724	-0.0122189	-0.0583691	0.0475217	0.0636616	-0.0116099
CANS3	-0.034604	-0.157478	-0.120236	0.0691302	-0.13226	-0.103451	-0.20725				3.55087	-0.236493	-1.57496	-2.91321	-0.217824	1.00337
CANS4	-0.164286	-0.0536269	-0.0431805	-0.0392467	-0.0714693	-0.0656027	-0.0709098				-0.673577	-0.194798	-0.0911009	0.821028	-0.0820853	0.0808963
CANS5	-0.0304407	-0.0296966	-0.0304442	-0.0345474	-0.0292742	-0.0248516	-0.0297343				-0.0244455	0.0251746	0.134779	-0.152638	-0.151075	0.196474
CANS6	-0.0123781	0.00105935	-0.22692	-0.163348	-0.199397	-0.339142	-0.380447				-1.08558	-215.208	-0.280153	0.22069	0.700839	0.121793
CANS7	-0.0924566	-0.382228	-0.210786	-0.0851477	-0.16972	-0.260016	-0.292544				3.13413	-0.448533	-0.596046	0.993239	0.532031	0.125099
CANS8	-0.0786214	-0.163752	-0.143086	-0.204865	-0.418906	-0.410859	-0.412373				1.0828	-0.126204	0.431757	1.0448	-0.0192095	0.00368426
CANS9	-0.560048	-0.652314	-0.602147	-0.625593	-0.616583	-0.58466	-0.612128				0.164748	-0.076907	0.038938	-0.0144028	-0.051774	0.0469821
CANS10	-0.404311	-0.64705	-0.452678	-0.421252	-0.428062	-0.468283	-0.42255				0.600375	-0.300398	-0.0694221	0.0161668	0.0939594	-0.0976591
CANS11	0.00829614	-0.00842278	0.0170603	0.11308	-0.110529	-0.122783	-0.158626				-2.01526	-3.0255	5.62825	-1.97744	0.110861	0.291927
CANS12	-0.378296	-0.645086	-0.663129	-0.569482	-0.643262	-0.554648	-0.654306				0.705241	0.0279697	-0.14122	0.129558	-0.137758	0.179679
CANS13	-0.0888315	-0.212677	-0.183209	-0.107629	-0.357616	-0.360348	-0.285256				1.39416	-0.13856	-0.412535	2.32268	0.00764126	-0.208388
CANS14	-0.273001	-0.291252	-0.2901	-0.289103	-0.388657	-0.328715	-0.247334				0.0668504	-0.00395445	-0.00343626	0.344354	-0.154228	-0.247572
CANS15	-0.521276	-0.692567	-0.674942	-0.700082	-0.705271	-0.712958	-0.74603				0.328601	-0.0254491	0.0372482	0.00741091	0.0108996	0.0463877
CANS16	-0.10301	-0.1759	-0.157468	-0.286461	-0.125954	-0.276618	-0.0975452				0.707602	-0.104789	0.819172	-0.56031	1.19619	-0.647365
CANS17	-0.299046	-0.3659	-0.368559	-0.281721	-0.486385	-0.502336	-0.461385				0.223557	0.00726522	-0.235613	0.726476	0.0327933	-0.0815196
CANS18	0.160488	0.155846	0.175312	0.309271	0.00427557	-0.0233974	-0.0732814				-0.0289275	0.124906	0.76412	-0.986175	-6.47235	2.13203
CANS19	-0.0517621	-0.159355	-0.144049	-0.0310912	-0.269999	-0.274089	-0.282323				2.0786	-0.0960461	-0.784163	7.68409	0.0151477	0.0300413
CANS20	0.157086	-0.0393118	-0.0310148	-0.0159589	-0.282208	-0.286336	-0.379037				-1.25026	-0.211056	-0.485442	16.6834	0.0146271	0.323747
CANS21	-0.0203806	0.0439389	0.0468324	0.0427842	-0.0901555	-0.09953	-0.0604845				-3.15591	0.0658536	-0.0864403	-3.10722	0.103981	-0.392298
CANS22	-0.00913714	-0.117547	-0.0929624	0.068422	-0.068778	-0.0232582	-0.0660535				11.8648	-0.20915	-1.73602	-2.0052	-0.661836	1.84
CANS23	0.0723	-0.103419	-0.122947	0.117216	-0.388135	-0.446504	-0.414003				-2.43042	0.188823	-1.95339	-4.31128	0.150383	-0.0727884
CANS24	-0.0175657	-0.0792937	-0.0824435	-0.0226692	-0.124317	-0.12897	-0.117715				3.51412	0.0397227	-0.725033	4.48395	0.0374276	-0.0872689
CANS25	-0.13467	-0.199874	-0.180392	-0.0976709	-0.202526	-0.279314	-0.299694				0.484176	-0.0974754	-0.458562	1.07355	0.379153	0.0729652
CANS26	0.106739	-0.0116796	-0.0094937	0.0563001	-0.237472	-0.242643	-0.174546				-1.10942	-0.187156	-6.93025	-5.21798	0.0217731	-0.280646
CANS27	-0.124067	-0.231173	-0.212699	-0.0466984	-0.320277	-0.314507	-0.33792				0.863286	-0.0799163	-0.780448	5.85842	-0.018015	0.074442
CANS28	-0.344207	-0.442694	-0.416127	-0.173439	-0.563839	-0.578522	-0.601366				0.286126	-0.0600121	-0.583205	2.25093	0.0260404	0.0394869
CANS29	-0.0631373	-0.0822649	-0.0686591	0.0823952	-0.231499	-0.243862	-0.257654				0.302952	-0.165391	-2.20006	-3.80962	0.053402	0.0565564
CANS30	0.0456735	-0.102415	-0.0461164	0.278614	-0.29755	-0.348618	-0.356126				-3.24234	-0.549713	-7.04154	-2.06797	0.171626	0.021538
CANS31	-0.138521	-0.364615	-0.342446	-0.153359	-0.231036	-0.341755	-0.353014				1.6322	-0.0608012	-0.552167	0.506505	0.479231	0.0329432
CANS32	-0.0873718	-0.229212	-0.209142	-0.0922376	-0.138095	-0.222342	-0.228446				1.62341	-0.0875612	-0.558971	0.497165	0.610068	0.0274517
CANS33	0.308086	0.130571	0.165508	0.36746	0.376018	0.243981	0.252412				-0.576187	0.267571	1.2202	0.0232897	-0.351146	0.0345554
CANS34	-0.0953786	-0.189878	-0.170388	-0.00479759	-0.298878	-0.313476	-0.324156				0.990779	-0.102644	-0.971843	61.2975	0.0488436	0.0340692
CANS35											#DIV/0!	#DIV/0!	#DIV/0!	#DIV/0!	#DIV/0!	#DIV/0!
SWIS1	0.156549	0.0954432	-0.0159615	-0.0611046	-0.231573	-0.223161	-0.196412				-0.390332	-1.16724	2.82825	2.78978	-0.0363252	-0.119863
SWIS2	-0.487859	-0.363644	-0.387556	-0.164973	-0.244913	-0.234269	-0.233245				-0.254614	0.0657578	-0.574325	0.484561	-0.0434605	-0.00436807
SWIS3	-0.0520516	-0.102134	-0.213942	-0.264111	-0.370843	-0.356808	-0.310623				0.962177	1.09471	0.234499	0.404121	-0.0378475	-0.129438
SWIS4	-0.132619	-0.293847	-0.0741688	-0.08855	-0.0873084	-0.0856685	-0.0873286				1.21573	-0.747594	0.193898	-0.0140208	-0.018783	0.0193782
SWIS5	-0.050393	-0.254562	-0.0445514	-0.0398027	-0.0612567	-0.0544114	-0.0508097				4.05154	-0.824988	-0.106589	0.539009	-0.111749	-0.0661936
SWIS6	0.112724	0.0985525	0.00899753	-0.0213024	-0.196858	-0.182629	-0.167331				-0.125722	-0.908703	-3.36759	8.24111	-0.072281	-0.0837687
SWIS7	-0.177348	-0.210835	-0.327929	-0.334834	-0.398352	-0.393856	-0.343232				0.18882	0.555382	0.0210559	0.189699	-0.0112869	-0.128534
SWIS8	-0.268326	-0.155124	-0.168486	-0.144609	-0.151793	-0.129622	-0.140652				-0.42188	0.0861351	-0.141716	0.049677	-0.146057	0.0850887
SWIS9	-0.798467	-0.7537	-0.760656	-0.769804	-0.789054	-0.780752	-0.765996				-0.0560668	0.00922932	0.012027	0.0250055	-0.010521	-0.0188995
SWIS10	-0.0466824	-0.0559991	-0.309099	-0.370812	-0.390606	-0.360216	-0.256876				0.199577	4.51972	0.199653	0.0533816	-0.0778028	-0.286885
SWIS11	0.0965074	0.0743579	-0.0317639	-0.0649558	-0.220368	-0.213002	-0.186475				-0.229511	-1.42718	1.04495	2.39259	-0.0334268	-0.124539
SWIS12	-0.0869974	-0.409618	-0.469966	-0.546243	-0.414717	-0.533803	-0.464757				3.70839	0.147327	0.162302	-0.240782	0.287148	-0.129348
SWIS13	-0.523099	-0.490025	-0.41905	-0.454398	-0.353095	-0.395953	-0.309553				-0.0632275	-0.14484	0.0843531	-0.222939	0.121379	-0.218207
SWIS14	-0.267067	-0.118563	-0.24143	-0.602113	-0.707296	-0.714328	-0.62731				-0.556056	1.0363	1.49394	0.17469	0.0099422	-0.121818
SWIS15	-0.374792	-0.319803	-0.41784	-0.496677	-0.393672	-0.358917	-0.281418				-0.146718	0.306555	0.188678	-0.20739	-0.0882838	-0.215925
SWIS16	-0.240385	-0.0948334	-0.230209	-0.085256	-0.399918	-0.303049	-0.442759				-0.605494	1.4275	-0.629658	3.69079	-0.242222	0.461015
SWIS17	-0.413496	-0.615004	-0.218292	-0.209067	-0.347999	-0.336356	-0.297899				0.487329	-0.645055	-0.0422635	0.664535	-0.0334561	-0.114335
SWIS18	0.0931412	0.0629711	-0.0503086	-0.0961393	-0.27097	-0.25649	-0.225482				-0.323918	-1.79892	0.910992	1.81851	-0.0534372	-0.120892
SWIS19	-0.139682	-0.102103	-0.1925	-0.197585	-0.304257	-0.306954	-0.314873				-0.269032	0.885344	0.0264172	0.539879	0.00886304	0.0257986
SWIS20	-0.102093	-0.161897	-0.0891001	-0.123394	-0.300029	-0.298748	-0.22749				0.585787	-0.44965	0.384886	1.43148	-0.00427074	-0.23852
SWIS21	-0.163498	-0.193621	-0.319936	-0.322957	-0.412802	-0.406926	-0.350525				0.184241	0.652386	0.0094413	0.278197	-0.0142359	-0.138602
SWIS22	-0.181932	-0.204351	-0.300521	-0.249638	-0.325332	-0.34245	-0.312093				0.123226	0.470612	-0.169315	0.303213	0.0526181	-0.0886459
SWIS23	0.0435701	-0.0751527	-0.0170561	-0.0760436	-0.222787	-0.224983	-0.182208				-2.72487	-0.773048	3.45845	1.92973	0.00985539	-0.190124
SWIS24	-0.121617	-0.173613	-0.176538	-0.197273	-0.25185	-0.287825	-0.264183				0.427539	0.0168426	0.117457	0.276655	0.142847	-0.0821411
SWIS25	-0.125359	-0.0843381	0.0136613	-0.0495903	-0.205819	-0.287358	-0.258035				-0.327227	-1.16198	-4.62998	3.1504	0.396166	-0.102042
SWIS26	0.0121139	0.044209	0.0913576	0.00106306	-0.238239	-0.195834	-0.173201				2.64944	1.06649	-0.988364	-225.107	-0.177991	-0.115572
SWIS27	-0.326529	-0.288824	-0.401251	-0.39617	-0.457139	-0.482068	-0.392578				-0.115472	0.389259	-0.0126624	0.153896	0.054533	-0.185639
SWIS28	-0.581037	-0.604535	-0.776411	-0.750637	-0.793022	-0.80111	-0.678276				0.0404401	0.284311	-0.0331963	0.0564661	0.0101983	-0.153329
SWIS29	-0.169758	-0.186374	-0.263602	-0.268594	-0.33628	-0.330884	-0.314713				0.0978837	0.414369	0.0189386	0.252	-0.0160473	-0.0488716
SWIS30	-0.0365561	-0.0625198	-0.386032	-0.345631	-0.449232	-0.469658	-0.296867				0.710242	5.17455	-0.104655	0.299742	0.0454699	-0.367908
SWIS31	-0.190996	-0.186606	-0.345054	-0.340182	-0.430825	-0.425998	-0.315453				-0.0229847	0.849104	-0.01412	0.266455	-0.0112047	-0.259497
SWIS32	-0.186544	-0.161566	-0.224945	-0.229887	-0.279761	-0.273892	-0.261571				-0.133895	0.392274	0.0219706	0.216949	-0.0209785	-0.044983
SWIS33	-0.195718	-0.235434	-0.196421	-0.205152	-0.26548	-0.257062	-0.233202				0.202929	-0.165709	0.0444518	0.294067	-0.0317106	-0.0928186
SWIS34	-0.193206	-0.188636	-0.348999	-0.343675	-0.434983	-0.431884	-0.344133				-0.0236575	0.850122	-0.0152543	0.26568	-0.0071231	-0.203183
SWIS35	-0.0301554	-0.0309162	-0.0308082	-0.0292887	-0.0293217	-0.0288587	-0.0287966				0.0252316	-0.00349298	-0.0493217	0.00112485	-0.0157903	-0.00215211
PRCS1	0.902599	0.920645	0.932993	0.90648	0.895989	0.881346	0.873416				0.0199932	0.0134127	-0.0284174	-0.0115738	-0.0163425	-0.00899723
PRCS2	0.916031	0.907058	0.925324	0.893049	0.898333	0.887138	0.862911				-0.00979562	0.0201381	-0.0348802	0.00591686	-0.0124623	-0.0273088
PRCS3	0.866618	0.901796	0.911759	0.877308	0.869927	0.849501	0.839247				0.0405921	0.0110484	-0.0377851	-0.00841364	-0.0234801	-0.0120703
PRCS4	0.651438	0.792526	0.76415	0.611138	0.609665	0.539488	0.506328				0.216578	-0.0358046	-0.200238	-0.00241031	-0.115107	-0.0614657
PRCS5	0.571806	0.658434	0.674673	0.524157	0.552778	0.47829	0.430645				0.151499	0.0246634	-0.223094	0.0546035	-0.134753	-0.0996152
PRCS6	0.722808	0.793233	0.816389	0.764523	0.765063	0.727303	0.663022				0.0974321	0.0291919	-0.0635304	0.000705589	-0.0493546	-0.0883828
PRCS7	0.756637	0.824402	0.880546	0.855463	0.831681	0.81085	0.778566				0.0895606	0.0681026	-0.0284857	-0.0278	-0.0250474	-0.0398151
PRCS8	0.870239	0.898246	0.898606	0.842806	0.85742	0.834288	0.797667				0.0321823	0.000401443	-0.0620965	0.0173404	-0.0269786	-0.0438958
PRCS9	0.871785	0.929203	0.919512	0.881716	0.880094	0.860794	0.844831				0.065862	-0.0104294	-0.041104	-0.00183961	-0.0219291	-0.0185452
PRCS10	0.789105	0.907026	0.86294	0.822595	0.834488	0.810276	0.765871				0.149436	-0.0486047	-0.0467534	0.0144581	-0.0290143	-0.0548019
PRCS11	0.848763	0.868466	0.896401	0.867206	0.856967	0.826965	0.836121				0.0232141	0.0321658	-0.0325691	-0.0118066	-0.0350099	0.0110717
PRCS12	0.902619	0.918709	0.937292	0.910349	0.923814	0.911417	0.884268				0.0178263	0.0202275	-0.0287457	0.0147911	-0.0134189	-0.0297877
PRCS13	0.811865	0.851534	0.843175	0.800506	0.825846	0.796094	0.742124				0.048862	-0.00981695	-0.0506046	0.0316543	-0.0360253	-0.0677941
PRCS14	0.846102	0.901708	0.908412	0.897038	0.889099	0.870575	0.84088				0.0657202	0.00743522	-0.0125213	-0.00884981	-0.0208352	-0.0341092
PRCS15	0.769517	0.807071	0.819911	0.836608	0.806482	0.780826	0.750581				0.0488016	0.0159096	0.0203648	-0.0360107	-0.0318121	-0.0387345
PRCS16	0.671783	0.72783	0.776411	0.752987	0.812632	0.776725	0.719126				0.0834296	0.066748	-0.03017	0.0792114	-0.0441852	-0.0741568
PRCS17	0.86241	0.883155	0.897123	0.863445	0.869099	0.854738	0.825727				0.024055	0.0158154	-0.0375398	0.00654778	-0.0165241	-0.0339415
PRCS18	0.582162	0.764822	0.793311	0.756626	0.756223	0.71101	0.650905				0.313762	0.0372495	-0.0462429	-0.000533344	-0.0597876	-0.084534
PRCS19											#DIV/0!	#DIV/0!	#DIV/0!	#DIV/0!	#DIV/0!	#DIV/0!
PRCS20	0.849531	0.897898	0.881527	0.860964	0.855881	0.837521	0.804453				0.0569338	-0.0182321	-0.0233264	-0.00590457	-0.0214508	-0.0394834
PRCS21	0.659374	0.759662	0.855385	0.832616	0.826924	0.801865	0.762109				0.152095	0.126007	-0.0266184	-0.00683543	-0.0303042	-0.0495793
PRCS22	0.762807	0.836576	0.87351	0.843066	0.824654	0.797771	0.772656				0.0967079	0.0441488	-0.0348525	-0.0218398	-0.0325988	-0.031481
PRCS23	0.777934	0.84242	0.854375	0.83026	0.825931	0.79954	0.776726				0.0828941	0.0141913	-0.0282254	-0.00521327	-0.0319536	-0.0285342
PRCS24	0.54995	0.664832	0.486613	0.462005	0.481436	0.426758	0.372435				0.208895	-0.268067	-0.0505681	0.0420567	-0.113573	-0.127291
PRCS25	0.49428	0.623327	0.696276	0.636679	0.586506	0.501774	0.564398				0.261081	0.117033	-0.0855945	-0.078804	-0.144469	0.124806
PRCS26	0.674718	0.775957	0.806487	0.802451	0.797211	0.768576	0.748241				0.150046	0.0393457	-0.00500487	-0.00652986	-0.0359197	-0.0264571
PRCS27	0.723511	0.747641	0.827933	0.793069	0.815211	0.79744	0.76531				0.0333506	0.107394	-0.0421107	0.0279206	-0.0217993	-0.0402922
PRCS28	0.844707	0.896977	0.921229	0.893846	0.890374	0.872797	0.845217				0.0618788	0.0270377	-0.0297245	-0.00388431	-0.0197413	-0.0315992
PRCS29	0.796875	0.886306	0.894126	0.8422	0.845495	0.815806	0.771086				0.112227	0.00882348	-0.0580746	0.00391195	-0.035114	-0.0548175
PRCS30	0.861196	0.900405	0.926192	0.9175	0.899451	0.887097	0.867779				0.0455288	0.0286388	-0.00938398	-0.0196719	-0.0137354	-0.0217769
PRCS31	0.591351	0.767824	0.846297	0.70456	0.744751	0.721737	0.682395				0.298424	0.102201	-0.167479	0.0570433	-0.030901	-0.0545112
PRCS32	0.519803	0.733006	0.793573	0.544499	0.658326	0.630224	0.577737				0.410161	0.0826283	-0.313864	0.209049	-0.0426876	-0.0832821
PRCS33	0.355738	0.688044	0.664751	0.365764	0.502769	0.469632	0.409088				0.934131	-0.0338533	-0.449773	0.374572	-0.0659085	-0.128918
PRCS34	0.698939	0.850667	0.817228	0.799946	0.774661	0.753053	0.712424				0.217083	-0.0393095	-0.0211469	-0.0316081	-0.0278934	-0.0539532
PRCS35											#DIV/0!	#DIV/0!	#DIV/0!	#DIV/0!	#DIV/0!	#DIV/0!
CYPS1	0.00199758	-0.409921	-0.382561	-0.244249	-0.433147	-0.467165	-0.466609				-206.209	-0.0667445	-0.361542	0.77338	0.0785388	-0.00119086
CYPS2	-0.277051	-0.318757	-0.339421	-0.345606	-0.394127	-0.366172	-0.376932				0.150533	0.0648264	0.0182241	0.140393	-0.0709302	0.0293852
CYPS3	-0.0897339	-0.481171	-0.457918	-0.365312	-0.528127	-0.546802	-0.542244				4.3622	-0.0483273	-0.202232	0.445687	0.0353615	-0.00833603
CYPS4	-0.0101169	-0.0850126	-0.0821583	-0.128969	-0.141651	-0.143954	-0.0712876				7.40299	-0.0335743	0.569765	0.098332	0.016258	-0.504789
CYPS5	-0.0439325	-0.0599485	-0.0453336	-0.0458776	-0.0588022	-0.0464552	-0.0441468				0.36456	-0.243791	0.0120005	0.281719	-0.209976	-0.0496906
CYPS6	-0.3144	-0.346831	-0.401048	-0.387849	-0.451783	-0.403857	-0.408325				0.103152	0.156318	-0.032911	0.164845	-0.106082	0.0110639
CYPS7	-0.427287	-0.641353	-0.638077	-0.661667	-0.720366	-0.708716	-0.696035				0.500987	-0.00510714	0.0369698	0.0887137	-0.0161717	-0.0178928
CYPS8	-0.150581	-0.165845	-0.0918882	-0.091228	-0.114144	-0.0778172	-0.0973949				0.101367	-0.445939	-0.00718528	0.251197	-0.318255	0.251586
CYPS9	-0.252503	-0.5271	-0.488888	-0.408965	-0.360651	-0.50517	-0.612174				1.08751	-0.0724959	-0.163479	-0.118136	0.400715	0.211817
CYPS10	-0.380371	-0.350276	-0.322847	-0.45989	-0.34487	-0.374599	-0.341909				-0.0791207	-0.078306	0.424483	-0.250104	0.0862035	-0.087266
CYPS11	-0.300025	-0.63716	-0.408162	-0.384415	-0.459717	-0.639702	-0.415939				1.12369	-0.359405	-0.0581783	0.195886	0.391513	-0.349792
CYPS12	-0.309269	-0.342835	-0.405463	-0.387197	-0.45506	-0.403046	-0.405621				0.108534	0.182676	-0.0450478	0.175267	-0.114302	0.00638821
CYPS13	-0.311247	-0.430554	-0.460735	-0.483837	-0.451114	-0.397985	-0.418455				0.383317	0.0700994	0.0501416	-0.0676333	-0.117771	0.0514321
CYPS14	-0.346988	-0.400076	-0.437789	-0.379766	-0.46697	-0.353871	-0.383694				0.152996	0.0942647	-0.132536	0.229625	-0.242197	0.0842759
CYPS15	-0.105269	-0.0559662	-0.0579677	-0.0487897	-0.0326687	-0.0312174	-0.0650387				-0.46835	0.035763	-0.158329	-0.330418	-0.0444246	1.08341
CYPS16	-0.215924	-0.257554	-0.181988	-0.208987	-0.29405	-0.222022	-0.247067				0.192798	-0.293397	0.148355	0.407024	-0.244952	0.112806
CYPS17	-0.556824	-0.539895	-0.516187	-0.550385	-0.591744	-0.610854	-0.587288				-0.0304018	-0.043912	0.0662498	0.0751467	0.0322929	-0.0385781
CYPS18	-0.40367	-0.413143	-0.480599	-0.456511	-0.556557	-0.484565	-0.48646				0.0234657	0.163277	-0.0501219	0.219155	-0.129353	0.00391202
CYPS19	-0.413321	-0.38149	-0.391356	-0.431879	-0.498137	-0.483064	-0.458824				-0.0770119	0.0258615	0.103546	0.153418	-0.0302603	-0.0501781
CYPS20	-0.614203	-0.466764	-0.622359	-0.571011	-0.656566	-0.538096	-0.648596				-0.240049	0.333348	-0.0825059	0.149831	-0.180439	0.205352
CYPS21	-0.589576	-0.405337	-0.543634	-0.47773	-0.57407	-0.439142	-0.558939				-0.312495	0.34119	-0.121228	0.201662	-0.235038	0.272799
CYPS22	-0.502228	-0.695869	-0.647733	-0.615687	-0.704691	-0.719703	-0.705639				0.385563	-0.0691733	-0.049474	0.14456	0.0213032	-0.0195409
CYPS23	-0.532125	-0.54133	-0.580334	-0.520002	-0.556371	-0.497587	-0.573239				0.0172982	0.0720524	-0.10396	0.069939	-0.105656	0.152038
CYPS24	-0.801292	-0.833212	-0.867082	-0.829232	-0.857418	-0.892318	-0.759042				0.0398354	0.0406504	-0.0436516	0.0339897	0.0407039	-0.14936
CYPS25	-0.501984	-0.486582	-0.247817	-0.0576818	-0.121627	-0.115616	-0.228723				-0.0306826	-0.490697	-0.767241	1.10859	-0.0494208	0.978299
CYPS26	-0.790845	-0.693706	-0.834931	-0.796479	-0.859543	-0.772943	-0.843622				-0.12283	0.203581	-0.0460541	0.0791786	-0.100751	0.0914409
CYPS27	-0.463118	-0.644607	-0.621751	-0.618382	-0.672973	-0.669711	-0.654381				0.391885	-0.0354574	-0.0054175	0.0882796	-0.00484661	-0.022891
CYPS28	-0.751396	-0.925388	-0.852182	-0.864957	-0.872273	-0.809221	-0.899283				0.231558	-0.0791087	0.0149907	0.00845905	-0.0722851	0.111295
CYPS29	-0.48391	-0.481403	-0.428898	-0.498354	-0.590832	-0.571497	-0.559734				-0.00518077	-0.109065	0.16194	0.185567	-0.0327261	-0.0205817
CYPS30	-0.582738	-0.798629	-0.634348	-0.688347	-0.78742	-0.823484	-0.765859				0.370477	-0.205703	0.0851243	0.14393	0.045799	-0.0699765
CYPS31	-0.308209	-0.338825	-0.535304	-0.346597	-0.378931	-0.50083	-0.464545				0.0993356	0.579883	-0.352522	0.0932899	0.321691	-0.07245
CYPS32	-0.396908	-0.616336	-0.605469	-0.591783	-0.634263	-0.606543	-0.586107				0.552843	-0.0176316	-0.022604	0.0717838	-0.0437055	-0.0336913
CYPS33	-0.190134	-0.209172	-0.201213	-0.223438	-0.202188	-0.176722	-0.172899				0.100126	-0.03805	0.110457	-0.0951047	-0.125954	-0.0216304
CYPS34	-0.530525	-0.73807	-0.669645	-0.684756	-0.741287	-0.739943	-0.71962				0.391208	-0.0927085	0.0225653	0.0825569	-0.00181253	-0.0274658
CYPS35	-0.308925	-0.302532	-0.305652	-0.307365	-0.335323	-0.317172	-0.308653				-0.0206952	0.0103136	0.0056053	0.0909607	-0.0541303	-0.0268583
CZES1	-0.257003	-0.122593	-0.0510845	-0.170789	-0.292894	-0.310537	0.294291				-0.52299	-0.5833	2.34326	0.714947	0.0602382	-1.94768
CZES2	0.0207313	-0.117364	-0.00208887	-0.064343	-0.0631627	-0.205809	-0.0742603				-6.66121	-0.982202	29.8028	-0.0183433	2.25839	-0.639178
CZES3	-0.234327	-0.108018	-0.0619627	-0.2144	-0.271494	-0.214352	0.217531				-0.53903	-0.426365	2.46015	0.266296	-0.210474	-2.01483
CZES4	-0.283797	-0.325321	-0.304876	-0.308272	-0.336867	-0.385117	-0.327525				0.146316	-0.0628467	0.0111402	0.0927571	0.143231	-0.149544
CZES5	-0.0607232	-0.0410734	-0.0531025	-0.0523255	-0.0748951	-0.0722724	-0.050931				-0.323595	0.292867	-0.0146313	0.43133	-0.0350178	-0.295292
CZES6	-0.140126	-0.394252	-0.318461	-0.330059	-0.233239	-0.281696	-0.275575				1.81356	-0.192242	0.0364204	-0.29334	0.207754	-0.0217282
CZES7	-0.12104	-0.215885	-0.17836	-0.223932	-0.17419	-0.176884	-0.134203				0.783578	-0.173818	0.255503	-0.22213	0.0154663	-0.241293
CZES8	-0.0125688	-0.145654	-0.136693	-0.13978	-0.125449	-0.121106	-0.0835614				10.5885	-0.0615264	0.0225885	-0.10253	-0.0346153	-0.310016
CZES9	-0.633289	-0.572893	-0.636558	-0.62423	-0.648431	-0.622439	-0.615609				-0.0953695	0.11113	-0.0193681	0.0387702	-0.0400851	-0.0109717
CZES10	-0.692968	-0.709719	-0.707203	-0.749221	-0.750539	-0.754683	-0.733029				0.0241717	-0.00354439	0.0594137	0.0017599	0.00552093	-0.0286921
CZES11	-0.332415	-0.295334	-0.109835	-0.346489	-0.443152	-0.46442	-0.259522				-0.111552	-0.628097	2.15462	0.278977	0.0479932	-0.441192
CZES12	-0.691702	-0.721128	-0.622102	-0.693045	-0.731477	-0.72718	-0.73008				0.0425416	-0.137321	0.114037	0.0554539	-0.00587437	0.00398765
CZES13	-0.621834	-0.698335	-0.651196	-0.702813	-0.679554	-0.678206	-0.696431				0.123025	-0.0675013	0.079264	-0.0330947	-0.00198365	0.0268733
CZES14	-0.710368	-0.751686	-0.719786	-0.801701	-0.875408	-0.85332	-0.823184				0.0581643	-0.0424376	0.113804	0.0919381	-0.0252317	-0.0353162
CZES15	-0.849317	-0.839063	-0.841674	-0.871576	-0.897571	-0.899482	-0.868165				-0.0120725	0.00311129	0.0355273	0.0298253	0.002129	-0.0348169
CZES16	-0.177635	-0.387931	-0.376977	-0.440444	-0.383755	-0.352698	-0.298684				1.18386	-0.0282387	0.168359	-0.12871	-0.080927	-0.153147
CZES17	0.12499	-0.223592	-0.100506	-0.179246	-0.179831	-0.341571	-0.18246				-2.78888	-0.550492	0.783425	0.00326306	0.899404	-0.465823
CZES18	0.00674892	-0.0808426	-0.0223802	-0.0862628	-0.134455	-0.113269	-0.0184083				-12.9786	-0.723164	2.85443	0.558666	-0.157568	-0.837481
CZES19	-0.673635	-0.711195	-0.708717	-0.744476	-0.750181	-0.761435	-0.716396				0.0557569	-0.00348295	0.050455	0.00766274	0.0150019	-0.0591493
CZES20	-0.139913	-0.330612	-0.277457	-0.318893	-0.300818	-0.343965	-0.175518				1.36298	-0.160779	0.149344	-0.0566808	0.143432	-0.489721
CZES21	-0.582095	-0.647788	-0.627754	-0.643198	-0.662295	-0.684166	-0.6069				0.112856	-0.0309271	0.0246032	0.0296907	0.0330222	-0.112934
CZES22	-0.128924	-0.203862	-0.17164	-0.188294	-0.166374	-0.178122	-0.134893				0.581254	-0.158059	0.0970291	-0.116412	0.0706101	-0.242693
CZES23	0.0567915	-0.497505	-0.430742	-0.516928	-0.462882	-0.409885	-0.377819				-9.76021	-0.134195	0.200088	-0.104553	-0.114495	-0.078232
CZES24	-0.0734344	-0.0826605	-0.0430887	-0.0433523	-0.0421235	-0.0388923	-0.0348919				0.125637	-0.478726	0.00611583	-0.028343	-0.0767081	-0.10286
CZES25	-0.102505	-0.115905	-0.0995164	-0.0909033	-0.0769131	-0.0627903	-0.0561055				0.130721	-0.141393	-0.0865496	-0.153902	-0.183621	-0.106462
CZES26	0.1267	-0.161814	-0.0549645	-0.164506	-0.107991	-0.0117939	0.00879559				-2.27714	-0.660322	1.99296	-0.343545	-0.890788	-1.74577
CZES27	-0.0587286	-0.12359	-0.101812	-0.124654	-0.130939	-0.124144	-0.0506077				1.10442	-0.176206	0.224347	0.0504214	-0.0518934	-0.592346
CZES28	0.00414037	-0.141506	-0.113356	-0.161736	-0.167576	-0.177916	-0.0897232				-35.1771	-0.19893	0.426797	0.0361084	0.0617007	-0.495699
CZES29	-0.130642	-0.239791	-0.195113	-0.231471	-0.25589	-0.247276	-0.121097				0.835483	-0.18632	0.18634	0.105494	-0.0336633	-0.510274
CZES30	0.0611374	-0.15886	-0.088905	-0.12806	-0.0952992	-0.134589	0.0593375				-3.59842	-0.440358	0.440415	-0.255824	0.41228	-1.44088
CZES31	-0.0333964	-0.152014	-0.113479	-0.15284	-0.127167	-0.0979652	-0.0880043				3.5518	-0.253498	0.346861	-0.167975	-0.229631	-0.101678
CZES32	-0.11141	-0.154866	-0.13925	-0.162095	-0.144714	-0.144703	-0.117633				0.390047	-0.100832	0.164056	-0.107229	-7.87705e-05	-0.18707
CZES33	-0.0862896	-0.176239	-0.192082	-0.206748	-0.193197	-0.163389	-0.0763537				1.04241	0.0898976	0.076349	-0.065544	-0.154284	-0.532689
CZES34	-0.348415	-0.465482	-0.359056	-0.365138	-0.392429	-0.404495	-0.430933				0.335998	-0.228636	0.0169377	0.0747425	0.0307462	0.0653625
CZES35	-0.0301073	-0.0379899	-0.0321515	-0.0334589	-0.0334483	-0.0301354	-0.0293956				0.261816	-0.153681	0.0406619	-0.000316959	-0.0990434	-0.0245519
GERS1	0.439797	0.395436	0.485513	0.476012	0.453887	0.433863	0.390246				-0.100867	0.227791	-0.0195688	-0.0464796	-0.0441178	-0.100531
GERS2	-0.3204	-0.269038	-0.306333	-0.369608	-0.403452	-0.503131	-0.479252				-0.160306	0.138625	0.206554	0.0915674	0.247064	-0.0474603
GERS3	0.214597	0.189432	0.278797	0.240293	0.205136	0.229976	0.155899				-0.117269	0.471754	-0.138106	-0.146308	0.12109	-0.322109
GERS4	-0.138728	-0.0685153	-0.105122	-0.109755	-0.116401	-0.122396	-0.0711016				-0.506118	0.534285	0.0440685	0.0605597	0.051501	-0.419086
GERS5	-0.0321604	-0.0295684	-0.0263164	-0.017122	-0.0268179	-0.0347196	-0.0216421				-0.0805939	-0.109982	-0.349379	0.566279	0.294643	-0.376659
GERS6	0.175352	0.221508	0.21406	0.134176	0.0830694	0.0655108	0.139133				0.263214	-0.0336203	-0.373185	-0.380893	-0.211373	1.12382
GERS7	0.309558	0.419533	0.364202	0.245015	0.165764	0.149383	0.237514				0.355263	-0.131887	-0.327255	-0.323451	-0.098822	0.589963
GERS8	-0.280994	-0.367591	-0.240405	-0.29197	-0.297802	-0.318625	-0.32748				0.308182	-0.346	0.214495	0.0199741	0.0699211	0.0277916
GERS9	-0.507156	-0.633844	-0.543825	-0.569854	-0.551627	-0.562878	-0.5546				0.249801	-0.142021	0.0478633	-0.0319854	0.0203962	-0.0147067
GERS10	-0.0411262	0.183345	0.101779	0.196387	0.0857244	0.0416113	0.174852				-5.4581	-0.444877	0.929547	-0.563492	-0.514592	3.20203
GERS11	0.356194	0.442411	0.429264	0.342235	0.252451	0.241572	0.327585				0.242051	-0.0297158	-0.202741	-0.262345	-0.0430932	0.356055
GERS12	0.0794703	0.317352	0.243368	0.259113	0.100316	0.0788688	0.273589				2.99334	-0.233129	0.0646933	-0.612849	-0.213793	2.46891
GERS13	-0.311799	-0.117163	-0.219036	-0.235473	-0.312305	-0.328919	-0.125954				-0.624236	0.8695	0.0750439	0.326287	0.053197	-0.617067
GERS14	-0.338399	-0.445026	-0.314724	-0.643404	-0.72326	-0.752922	-0.574581				0.315091	-0.292797	1.04435	0.124115	0.0410106	-0.236864
GERS15	-0.618222	-0.564135	-0.619168	-0.65894	-0.715189	-0.713324	-0.595882				-0.0874877	0.0975525	0.0642352	0.085362	-0.0026075	-0.16464
GERS16	-0.0991479	0.0697921	-0.17006	0.0198948	0.0468173	0.0464602	0.081319				-1.70392	-3.43666	-1.11699	1.35325	-0.00762904	0.750295
GERS17	0.0910162	0.307077	0.2377	0.213173	0.170911	0.160224	0.247044				2.37387	-0.225926	-0.103186	-0.198253	-0.0625251	0.541865
GERS18	0.474505	0.584742	0.559893	0.488993	0.418466	0.407372	0.488479				0.23232	-0.0424956	-0.126632	-0.144228	-0.0265124	0.199098
GERS19	-0.44736	-0.231999	-0.301568	-0.336413	-0.433474	-0.429778	-0.348398				-0.481404	0.299867	0.115546	0.288517	-0.00852603	-0.189353
GERS20	0.326469	0.438969	0.439599	0.285029	0.159687	0.0994278	0.232235				0.344599	0.00143528	-0.351616	-0.439753	-0.377357	1.33571
GERS21	0.176309	0.315196	0.26209	0.240619	0.177315	0.124334	0.177416				0.787744	-0.168486	-0.0819222	-0.26309	-0.298796	0.426935
GERS22	0.0317067	0.0506657	0.0470123	0.0185296	8.53988e-05	0.000656492	0.0274182				0.597948	-0.0721077	-0.605855	-0.995391	6.68737	40.7647
GERS23	0.423028	0.470812	0.464201	0.31289	0.239186	0.233554	0.288633				0.112956	-0.0140415	-0.325959	-0.235561	-0.0235434	0.235826
GERS24	-0.348624	-0.244839	-0.368456	-0.298163	-0.437411	-0.424221	-0.317194				-0.297698	0.504889	-0.190778	0.46702	-0.0301541	-0.25229
GERS25	0.0535295	0.100326	0.0741389	0.0104693	0.00397621	-0.00560794	0.0284732				0.87422	-0.26102	-0.858788	-0.620204	-2.41037	-6.07731
GERS26	0.472137	0.5585	0.552651	0.40846	0.334277	0.324233	0.376576				0.18292	-0.0104721	-0.260908	-0.181616	-0.0300483	0.161437
GERS27	0.332874	0.468975	0.429454	0.327691	0.240776	0.223994	0.303099				0.408864	-0.0842702	-0.236959	-0.265234	-0.0697023	0.353157
GERS28	0.407461	0.503517	0.331134	0.367783	0.290108	0.256236	0.323058				0.235742	-0.342358	0.110679	-0.211198	-0.116757	0.260781
GERS29	0.491565	0.604146	0.572779	0.480873	0.392029	0.360479	0.447876				0.229027	-0.0519203	-0.160456	-0.184756	-0.080477	0.242446
GERS30	0.567775	0.670538	0.642204	0.54137	0.443437	0.4121	0.50765				0.180992	-0.0422553	-0.157013	-0.180898	-0.070668	0.23186
GERS31	0.340914	0.474194	0.420113	0.304562	0.220094	0.193526	0.281639				0.390948	-0.114047	-0.275049	-0.277341	-0.120713	0.455305
GERS32	0.12942	0.200531	0.194524	0.117709	0.0686932	0.0462761	0.100499				0.549457	-0.0299568	-0.394887	-0.416414	-0.326336	1.17173
GERS33	0.0270174	0.0427488	0.0448846	0.00931543	-0.00421717	-0.00846912	0.0157514				0.582266	0.0499615	-0.792458	-1.45271	1.00824	-2.85987
GERS34	0.352221	0.46972	0.45411	0.336386	0.25698	0.231273	0.324818				0.333595	-0.0332325	-0.259242	-0.236055	-0.100036	0.40448
GERS35	-0.0285716	-0.0285714	-0.0285714								-6.90228e-06	-4.96262e-08	-1	#DIV/0!	#DIV/0!	#DIV/0!
DENS1	-0.448828	-0.449911	-0.317664	-0.330562	-0.178701	-0.189631	-0.212889				0.00241257	-0.293941	0.0406019	-0.459403	0.0611651	0.122649
DENS2	-0.0788218	-0.369996	-0.179117	-0.439039	-0.229232	-0.463613	-0.387669				3.69407	-0.515895	1.45114	-0.477879	1.02246	-0.16381
DENS3	-0.348011	-0.216847	-0.571802	-0.276047	-0.0638649	-0.0301628	-0.428632				-0.376897	1.63689	-0.517233	-0.768645	-0.527709	13.2106
DENS4	-0.120633	-0.0979984	-0.17764	-0.0792833	-0.0949916	-0.0902142	-0.0864338				-0.187632	0.812685	-0.553686	0.198129	-0.0502926	-0.0419044
DENS5	-0.0361956	-0.0613893	-0.0583846	-0.0536162	-0.0459601	-0.0454422	-0.0399087				0.696044	-0.0489441	-0.081673	-0.142794	-0.0112688	-0.121769
DENS6	-0.157147	0.0273556	-0.230761	0.0081733	-0.045321	-0.0396786	-0.0878134				-1.17408	-9.43561	-1.03542	-6.545	-0.124499	1.21312
DENS7	0.0569331	0.00618165	0.0307318	0.0617764	-0.104877	-0.112523	-0.173972				-0.891422	3.97146	1.01018	-2.69768	0.0729133	0.5461
DENS8	-0.379212	-0.394266	-0.378503	-0.364688	-0.187241	-0.144433	-0.0314822				0.0396993	-0.0399799	-0.0364993	-0.486572	-0.228628	-0.782029
DENS9	-0.661964	-0.798293	-0.774249	-0.766962	-0.816867	-0.798588	-0.863762				0.205946	-0.0301185	-0.00941169	0.0650676	-0.0223763	0.0816107
DENS10	-0.137443	-0.0392166	-0.161879	-0.0520327	-0.0689928	-0.0643607	-0.0925113				-0.714671	3.12781	-0.67857	0.32595	-0.0671386	0.437389
DENS11	-0.129244	0.129625	-0.218187	0.106855	0.00980765	0.0184193	0.00461975				-2.00294	-2.68322	-1.48974	-0.908215	0.878058	-0.74919
DENS12	-0.1165	-0.15639	-0.18055	-0.122458	-0.253409	-0.324706	-0.151664				0.342406	0.154487	-0.321749	1.06935	0.281355	-0.532921
DENS13	-0.133778	0.100618	-0.212696	0.0923813	0.0197267	0.0251587	-0.0370837				-1.75213	-3.1139	-1.43433	-0.786464	0.275362	-2.47399
DENS14	-0.364533	-0.248341	-0.139574	-0.3975	-0.474971	-0.491936	-0.333998				-0.318741	-0.437975	1.84796	0.194896	0.0357159	-0.321054
DENS15	-0.301664	-0.217282	-0.19897	-0.252008	-0.249253	-0.267232	-0.0707439				-0.279721	-0.0842793	0.266563	-0.010931	0.0721289	-0.735271
DENS16	-0.247259	-0.159311	-0.167589	-0.248529	-0.207701	-0.21964	-0.269805				-0.355695	0.0519645	0.482967	-0.164277	0.0574793	0.228396
DENS17	-0.175896	-0.167733	-0.210181	-0.58913	-0.50403	-0.493661	-0.612975				-0.0464073	0.253071	1.80296	-0.14445	-0.0205722	0.241692
DENS18	-0.099034	0.268473	-0.229798	0.28936	0.144722	0.155907	0.0894411				-3.71091	-1.85595	-2.25919	-0.499856	0.0772891	-0.426317
DENS19	0.0796172	0.0398348	0.0546975	0.0646434	-0.0532092	-0.0383407	-0.119755				-0.499671	0.373108	0.181836	-1.82312	-0.279434	2.12345
DENS20	0.125256	0.114295	-0.0547191	0.437496	0.305427	0.251679	0.271924				-0.0875107	-1.47875	-8.9953	-0.301873	-0.175977	0.0804373
DENS21	-0.152116	0.0874066	-0.234139	0.111189	0.0220047	0.0647574	-0.0427613				-1.5746	-3.67873	-1.47489	-0.802097	1.94289	-1.66033
DENS22	-0.0137112	-0.0299446	-0.0112174	-0.0168968	-0.128757	-0.121085	-0.182457				1.18396	-0.625393	0.506301	6.62017	-0.0595824	0.506853
DENS23	0.148022	0.0722136	-0.0419257	0.306319	0.208915	0.173745	0.161106				-0.512144	-1.58058	-8.30622	-0.317983	-0.168346	-0.0727452
DENS24	-0.704209	-0.833827	-0.612706	-0.795412	-0.691332	-0.615598	-0.632497				0.184061	-0.265188	0.298196	-0.13085	-0.109548	0.0274507
DENS25	-0.0609176	-0.0809294	-0.087673	-0.0675302	-0.086998	-0.0921197	-0.106483				0.328506	0.0833269	-0.229749	0.288283	0.058871	0.155916
DENS26	-0.323678	-0.637835	-0.188625	-0.458428	-0.190742	-0.0765164	-0.0610664				0.970586	-0.704273	1.43036	-0.583921	-0.598849	-0.201917
DENS27	0.124994	0.0631966	0.109495	0.178571	-0.0676507	-0.0675439	-0.147006				-0.494402	0.73261	0.630862	-1.37884	-0.0015785	1.17646
DENS28	0.280495	0.288401	0.324489	0.319958	0.177641	0.171215	0.116206				0.0281834	0.125132	-0.0139634	-0.444798	-0.0361727	-0.321288
DENS29	0.198884	0.197138	0.226883	0.260926	0.0607228	0.0796201	-0.0661619				-0.00878231	0.150884	0.150049	-0.76728	0.311206	-1.83097
DENS30	0.282775	0.269078	0.328376	0.395328	0.134133	0.0884964	-0.0260952				-0.0484358	0.220375	0.203888	-0.660703	-0.340236	-1.29487
DENS31	-0.0390441	-0.0437639	-0.0308003	-0.00478253	-0.111973	-0.118187	-0.16795				0.120885	-0.296216	-0.844725	22.4129	0.0554998	0.421049
DENS32	-0.0685198	-0.0728797	-0.0616026	-0.0536707	-0.130889	-0.132236	-0.168793				0.0636303	-0.154737	-0.128758	1.43873	0.0102932	0.276455
DENS33	-0.0800399	-0.0810715	-0.0903935	-0.0791437	-0.12342	-0.124934	-0.153976				0.0128889	0.114985	-0.124453	0.559443	0.012265	0.232461
DENS34	0.0718098	0.0484757	0.106477	0.096804	-0.0856893	-0.0669473	-0.139874				-0.324944	1.19651	-0.0908486	-1.88518	-0.21872	1.08931
DENS35	-0.0403946	-0.0467947	-0.0666247	-0.0598031	-0.0808258	-0.0816637	-0.10209				0.15844	0.423765	-0.102387	0.351531	0.0103672	0.250124
SPAS1	0.64398	0.456907	0.633809	0.649196	0.612173	0.612672	0.692358				-0.290496	0.387175	0.0242756	-0.0570285	0.00081525	0.130063
SPAS2	-0.106611	-0.301099	-0.415643	-0.335995	-0.438058	-0.36032	-0.37185				1.82427	0.380418	-0.191626	0.303763	-0.17746	0.0320003
SPAS3	0.618531	0.424364	0.610022	0.632449	0.587773	0.60672	0.689286				-0.313917	0.437499	0.0367635	-0.0706397	0.032235	0.136087
SPAS4	-0.205773	-0.219586	-0.175636	-0.137032	-0.226936	-0.231335	-0.260136				0.0671287	-0.20015	-0.219795	0.656078	0.0193878	0.124497
SPAS5	-0.049744	-0.114349	-0.109616	-0.141455	-0.0985101	-0.096378	-0.104858				1.29876	-0.0413952	0.290466	-0.303596	-0.0216438	0.0879886
SPAS6	0.166746	0.026893	0.169795	0.195585	0.139432	0.155382	0.221004				-0.838718	5.31373	0.151887	-0.287103	0.114389	0.422328
SPAS7	0.390283	0.101988	0.390345	0.462491	0.37662	0.387184	0.511461				-0.738681	2.82735	0.184827	-0.18567	0.0280484	0.320977
SPAS8	0.0408841	-0.356302	-0.300116	-0.167215	-0.172683	-0.12671	-0.150566				-9.71493	-0.157691	-0.442833	0.0326992	-0.266227	0.188275
SPAS9	0.196853	-0.548684	-0.450183	-0.578154	-0.568063	-0.568639	-0.401077				-3.78728	-0.179522	0.284264	-0.0174539	0.00101367	-0.294672
SPAS10	-0.245323	-0.380898	-0.364969	-0.175729	-0.23201	-0.0982001	-0.0699903				0.552636	-0.0418198	-0.518508	0.320268	-0.576742	-0.287269
SPAS11	0.0848337	-0.42328	0.169305	-0.0575933	-0.00914032	-0.0414924	0.147854				-5.98953	-1.39998	-1.34017	-0.841295	3.53949	-4.56339
SPAS12	0.0351738	-0.41758	-0.0283501	-0.0126184	-0.184915	-0.24961	-0.0900553				-12.8719	-0.932108	-0.55491	13.6545	0.349863	-0.639216
SPAS13	0.0340444	-0.0976098	-0.0710531	0.222284	0.108237	0.139254	0.149113				-3.86713	-0.27207	-4.12842	-0.513069	0.286567	0.0707965
SPAS14	0.0203133	0.0203497	0.0679715	0.110053	-0.326256	-0.455658	0.179959				0.00179157	2.34017	0.619105	-3.96453	0.396629	-1.39494
SPAS15	-0.555649	-0.595349	-0.587217	-0.388862	-0.553824	-0.503248	-0.513324				0.0714478	-0.0136588	-0.337788	0.424215	-0.0913199	0.0200211
SPAS16	0.19659	0.0712399	0.12656	0.099788	0.115714	0.0981216	0.155034				-0.637622	0.776536	-0.211537	0.159603	-0.152037	0.580021
SPAS17	0.448264	0.117113	0.354749	0.311467	0.283322	0.31657	0.363705				-0.73874	2.02911	-0.122008	-0.0903613	0.117349	0.148893
SPAS18	0.344793	0.195671	0.438689	0.468718	0.392974	0.404405	0.467189				-0.432497	1.24197	0.068453	-0.161598	0.0290887	0.155251
SPAS19	-0.0171196	-0.000311731	0.020687	0.252441	0.148585	0.287478	0.315175				-0.981791	-67.3615	11.2029	-0.411408	0.934776	0.0963447
SPAS20	0.563812	0.411485	0.597852	0.518751	0.486573	0.480911	0.562691				-0.270173	0.452912	-0.132308	-0.0620305	-0.0116355	0.170052
SPAS21	0.287001	0.121631	0.33494	0.356416	0.272504	0.292773	0.347264				-0.576201	1.75375	0.0641179	-0.235433	0.0743809	0.186121
SPAS22	0.424235	0.191571	0.494571	0.469109	0.415823	0.466454	0.589284				-0.548433	1.58166	-0.0514823	-0.113589	0.121761	0.263326
SPAS23	0.555459	0.411122	0.567426	0.486437	0.491545	0.506141	0.566447				-0.259851	0.380189	-0.142731	0.0105006	0.0296948	0.119149
SPAS24	0.0712224	-0.0248852	0.0614106	0.0447502	0.0232287	0.0198	0.0693863				-1.3494	-3.46776	-0.271295	-0.480925	-0.147604	2.50435
SPAS25	0.15825	-0.0127035	0.206415	0.173031	0.118687	0.17513	0.316809				-1.08027	-17.2487	-0.161731	-0.314073	0.475565	0.808994
SPAS26	0.558171	0.463691	0.604223	0.510258	0.515022	0.518429	0.572117				-0.169266	0.303071	-0.155514	0.00933719	0.00661526	0.103558
SPAS27	0.29166	0.0474185	0.30676	0.368158	0.267161	0.27981	0.405487				-0.837419	5.4692	0.200151	-0.274331	0.0473473	0.449153
SPAS28	0.466801	0.29392	0.513705	0.562529	0.481353	0.482129	0.590561				-0.370353	0.747771	0.0950425	-0.144305	0.0016119	0.224904
SPAS29	0.511865	0.342625	0.575978	0.620632	0.527084	0.537961	0.611335				-0.330634	0.681072	0.0775272	-0.15073	0.0206361	0.136393
SPAS30	0.548707	0.260114	0.579492	0.643788	0.569163	0.583748	0.690315				-0.525951	1.22784	0.110953	-0.115916	0.0256253	0.182557
SPAS31	0.33798	0.233483	0.394007	0.290608	0.296334	0.309691	0.362511				-0.309181	0.68752	-0.262429	0.0197028	0.0450734	0.170557
SPAS32	0.128616	-0.0112373	0.185152	0.204627	0.135909	0.153831	0.259814				-1.08737	-17.4766	0.105182	-0.335822	0.131868	0.68896
SPAS33	0.236511	0.110717	0.278771	0.214693	0.191626	0.190988	0.263166				-0.531873	1.51786	-0.229857	-0.107446	-0.00332917	0.377923
SPAS34	0.351333	0.180586	0.438905	0.45744	0.379373	0.395624	0.491001				-0.485999	1.43045	0.0422299	-0.170659	0.0428347	0.241081
SPAS35	-0.0285714	-0.0285716	-0.0285715	-0.0285715	-0.0285716	-0.0285714	-0.0285718				5.57125e-06	-1.70695e-06	-1.91416e-06	2.88015e-06	-6.08343e-06	1.55676e-05
ESTS1	-0.428778	-0.570797	-0.489962	-0.451645	-0.549529	-0.509772	-0.45258				0.331218	-0.141618	-0.0782035	0.216729	-0.0723481	-0.112192
ESTS2	-0.350187	-0.348802	-0.104236	0.0171108	-0.199468	-0.140793	-0.249248				-0.00395569	-0.701161	-1.16415	-12.6574	-0.294157	0.770309
ESTS3	-0.273432	-0.257378	-0.160382	-0.230586	-0.298846	-0.174133	-0.0357299				-0.0587155	-0.376862	0.437731	0.29603	-0.417316	-0.794812
ESTS4	-0.163395	-0.370879	-0.220318	-0.160527	-0.38875	-0.0973615	-0.0878503				1.26983	-0.405956	-0.271387	1.42171	-0.749552	-0.0976893
ESTS5	-0.0610393	-0.270401	-0.0897534	-0.063358	-0.0639609	-0.0411774	-0.0510655				3.42995	-0.668073	-0.294088	0.00951609	-0.356209	0.240132
ESTS6	-0.721225	-0.841417	-0.795359	-0.747545	-0.777603	-0.752918	-0.759024				0.166649	-0.0547392	-0.0601158	0.0402091	-0.0317454	0.00811042
ESTS7	-0.481352	-0.594717	-0.387398	-0.363466	-0.426649	-0.408807	-0.271466				0.235512	-0.3486	-0.0617776	0.173835	-0.0418188	-0.335956
ESTS8	-0.309034	-0.383163	-0.255792	-0.206176	-0.221101	-0.100432	-0.269916				0.239872	-0.332418	-0.193972	0.072389	-0.545764	1.68755
ESTS9	-0.524134	-0.352569	-0.318342	-0.336799	-0.38644	-0.470415	-0.438184				-0.327331	-0.0970797	0.0579805	0.14739	0.217303	-0.0685146
ESTS10	-0.444585	-0.4722	-0.330149	-0.308556	-0.337577	-0.338805	-0.334162				0.0621131	-0.300828	-0.0654029	0.0940552	0.00363723	-0.013705
ESTS11	-0.345289	-0.612239	-0.0900224	0.0302737	-0.198368	-0.128183	-0.268358				0.773123	-0.852962	-1.33629	-7.55248	-0.353812	1.09355
ESTS12	-0.503562	-0.762088	-0.601345	-0.610385	-0.667671	-0.708218	-0.748415				0.513395	-0.210924	0.0150327	0.0938522	0.0607289	0.0567572
ESTS13	-0.468908	-0.228457	-0.610281	-0.507021	-0.466327	-0.433448	-0.141049				-0.51279	1.67132	-0.169201	-0.0802612	-0.0705071	-0.674588
ESTS14	-0.875776	-0.561934	-0.636553	-0.662859	-0.680062	-0.711825	-0.632824				-0.358359	0.13279	0.0413249	0.0259539	0.0467048	-0.110983
ESTS15	-0.515112	-0.362645	-0.314165	-0.311336	-0.398981	-0.307682	-0.201788				-0.295989	-0.133685	-0.00900338	0.281512	-0.228831	-0.344166
ESTS16	-0.505434	-0.508871	-0.464482	-0.379051	-0.554512	-0.492244	-0.45525				0.00680086	-0.0872315	-0.183927	0.462895	-0.112292	-0.0751553
ESTS17	-0.255529	-0.388442	-0.445717	-0.393469	-0.589485	-0.559965	-0.43493				0.52015	0.147449	-0.117224	0.498175	-0.0500779	-0.22329
ESTS18	-0.455555	-0.427526	0.0385643	0.205977	-0.138577	-0.0181445	-0.313362				-0.0615261	-1.0902	4.34114	-1.67278	-0.869066	16.2704
ESTS19	-0.413312	-0.271328	-0.049048	-0.0136346	-0.165529	-0.0935488	-0.218232				-0.343527	-0.81923	-0.722014	11.1403	-0.43485	1.33281
ESTS20	-0.384161	-0.472744	-0.419186	-0.42159	-0.546269	-0.516909	-0.476665				0.230587	-0.113292	0.00573568	0.295736	-0.0537473	-0.0778553
ESTS21	-0.291074	-0.282215	-0.0845093	-0.0297242	-0.158177	-0.121445	-0.175374				-0.0304352	-0.70055	-0.648272	4.3215	-0.232225	0.444066
ESTS22	-0.189683	-0.0591471	0.0645916	-0.0187002	-0.297015	-0.266382	0.140752				-0.688179	-2.09205	-1.28951	14.883	-0.103136	-1.52838
ESTS23	-0.477987	-0.253747	-0.138661	-0.245162	-0.41341	-0.369237	-0.376219				-0.469134	-0.453548	0.768069	0.686273	-0.10685	0.0189087
ESTS24	-0.507764	-0.532767	-0.50622	-0.352212	-0.404683	-0.476558	-0.186747				0.0492418	-0.049829	-0.304231	0.148976	0.177608	-0.608134
ESTS25	-0.193777	-0.15992	-0.113886	-0.0625764	-0.221332	-0.199	-0.194421				-0.174721	-0.287857	-0.450534	2.53699	-0.100899	-0.0230111
ESTS26	-0.721449	-0.484622	-0.164536	-0.493236	-0.399448	-0.569261	-0.283301				-0.328266	-0.660486	1.99774	-0.190148	0.425119	-0.502335
ESTS27	-0.129659	-0.276269	-0.208124	-0.0656333	-0.241068	-0.217482	-0.0269311				1.13073	-0.246662	-0.684643	2.67296	-0.0978413	-0.876169
ESTS28	-0.161448	-0.181969	0.128588	0.107034	-0.174328	-0.148231	0.00382764				0.127102	-1.70665	-0.167617	-2.62871	-0.1497	-1.02582
ESTS29	-0.146884	-0.19784	0.236632	0.223861	-0.12535	-0.0930989	0.0311526				0.346912	-2.19608	-0.0539715	-1.55994	-0.257286	-1.33462
ESTS30	-0.0731172	-0.0243506	0.130553	0.100027	-0.377713	-0.341403	0.200242				-0.666965	-6.36141	-0.233819	-4.7761	-0.0961321	-1.58653
ESTS31	-0.185705	-0.122274	-0.0569367	-0.0970847	-0.230987	-0.20698	-0.0310297				-0.341565	-0.534353	0.705134	1.37923	-0.103934	-0.850083
ESTS32	-0.146518	-0.0661095	-0.0398615	-0.0757694	-0.14521	-0.128158	-0.0400063				-0.548798	-0.397038	0.900816	0.916473	-0.117431	-0.687835
ESTS33	-0.0915333	-0.186245	-0.165024	-0.0548036	-0.0762724	-0.073837	-0.0408665				1.03472	-0.113942	-0.667905	0.391741	-0.0319314	-0.446531
ESTS34	-0.493702	-0.484764	-0.0249549	-0.0704238	-0.269577	-0.243541	0.00894336				-0.0181036	-0.948522	1.82205	2.82792	-0.0965795	-1.03672
ESTS35											#DIV/0!	#DIV/0!	#DIV/0!	#DIV/0!	#DIV/0!	#DIV/0!
FINS1	-0.224253	0.186945	0.101924	0.246458	0.193969	0.262222	0.427957				-1.83364	-0.454794	1.41807	-0.212972	0.351873	0.632042
FINS2	-0.190924	0.155356	0.00797125	-0.0927193	-0.228667	-0.216777	-0.0568989				-1.81371	-0.948691	-12.6317	1.46623	-0.0519967	-0.737524
FINS3	0.0116656	-0.0472884	0.204658	0.303928	0.00402297	0.00498639	0.354606				-5.05365	-5.32787	0.485052	-0.986763	0.23948	70.1147
FINS4	-0.117129	-0.0572002	-0.0373253	-0.0462135	-0.0606098	-0.0578828	-0.0293965				-0.51165	-0.347462	0.238128	0.311516	-0.0449912	-0.492138
FINS5	-0.0434536	-0.0500951	-0.0388288	-0.044366	-0.0498477	-0.0493287	-0.0342807				0.152842	-0.224899	0.142606	0.123557	-0.0104126	-0.305056
FINS6	0.238743	0.0805099	0.477413	0.426311	0.230048	0.213953	0.484087				-0.662776	4.92987	-0.107039	-0.460377	-0.0699603	1.26258
FINS7	-0.703624	-0.44344	-0.486912	-0.345943	-0.436847	-0.339235	0.0289995				-0.369777	0.0980337	-0.289517	0.262771	-0.223447	-1.08549
FINS8	-0.303448	-0.0796264	-0.124281	-0.0930587	-0.253771	-0.393728	-0.269169				-0.737594	0.560801	-0.251223	1.727	0.551506	-0.316358
FINS9	-0.47669	-0.20691	-0.465572	-0.381903	-0.344998	-0.371874	-0.260559				-0.565945	1.25012	-0.179712	-0.0966344	0.0779022	-0.299337
FINS10	0.0898892	-0.0870578	0.245783	0.190137	-0.0115812	-0.019285	0.245804				-1.9685	-3.82322	-0.226403	-1.06091	0.665199	-13.7459
FINS11	0.273343	0.00923751	0.41338	0.352034	0.113145	0.10126	0.361792				-0.966205	43.7502	-0.148402	-0.678597	-0.10504	2.5729
FINS12	-0.481122	-0.393919	-0.312128	-0.34708	-0.496439	-0.543759	-0.282777				-0.181249	-0.207634	0.111982	0.43033	0.0953175	-0.479959
FINS13	-0.37613	-0.0936421	-0.0516982	0.114056	0.00625396	-0.0383988	0.100506				-0.751038	-0.447917	-3.2062	-0.945168	-7.13991	-3.61742
FINS14	0.000490591	-0.215368	0.163652	-0.518732	-0.788081	-0.836918	-0.11251				-439.997	-1.75987	-4.16972	0.519245	0.0619699	-0.865567
FINS15	-0.408056	-0.0730863	-0.0732257	-0.040377	-0.0743617	-0.0830918	-0.0364719				-0.820892	0.00190733	-0.448595	0.841683	0.117401	-0.561066
FINS16	-0.0283408	-0.0792712	0.100625	0.0440703	-0.0556657	-0.0623346	0.084249				1.79707	-2.26937	-0.562033	-2.26311	0.119802	-2.35156
FINS17	-0.36056	-0.0583219	-0.176354	0.00611825	-0.122943	-0.0202857	0.146089				-0.838246	2.0238	-1.03469	-21.0944	-0.834999	-8.20161
FINS18	0.363938	0.0305297	0.47943	0.438796	0.174273	0.139063	0.416789				-0.916113	14.7037	-0.0847536	-0.602838	-0.202042	1.99713
FINS19	-0.338933	-0.0401827	-0.144354	-0.0241262	-0.103327	-0.0344303	0.164006				-0.881444	2.59246	-0.832868	3.28277	-0.666783	-5.76343
FINS20	-0.0619517	-0.0100568	0.281434	0.286173	0.0694002	0.00319334	0.117272				-0.837668	-28.9846	0.0168371	-0.757488	-0.953987	35.7238
FINS21	0.109997	-0.12363	0.254584	0.200789	-0.0241485	-0.0397581	0.191287				-2.12394	-3.05924	-0.211303	-1.12027	0.646398	-5.81128
FINS22	0.0671309	-0.112385	0.197026	0.126405	-0.0478853	-0.0749445	0.185655				-2.67412	-2.75313	-0.358435	-1.37882	0.565083	-3.47723
FINS23	-0.473095	-0.174605	-0.279721	-0.156065	-0.242805	-0.16391	0.101439				-0.63093	0.602018	-0.442069	0.555794	-0.324929	-1.61887
FINS24	-0.112853	-0.0921424	-0.359856	-0.356091	-0.421762	-0.516638	-0.0414334				-0.183521	2.90543	-0.0104621	0.184423	0.224952	-0.919802
FINS25	-0.0351214	-0.181409	0.0809652	-0.0338552	-0.0907406	-0.12499	0.0881338				4.16519	-1.44631	-1.41815	1.68025	0.37744	-1.70513
FINS26	-0.453089	-0.193606	-0.254565	-0.136444	-0.227215	-0.145915	0.115027				-0.572697	0.314862	-0.46401	0.665255	-0.357812	-1.78832
FINS27	0.0179248	-0.218864	0.206935	0.13274	-0.1649	-0.178734	0.146996				-13.2101	-1.94549	-0.358542	-2.24228	0.08389	-1.82243
FINS28	0.258127	-0.0674433	0.380929	0.321084	0.00558699	-0.0268813	0.285107				-1.26128	-6.64814	-0.157104	-0.9826	-5.81141	-11.6062
FINS29	0.297621	-0.0643982	0.449924	0.397263	0.0129581	-0.0287515	0.353568				-1.21638	-7.98658	-0.117044	-0.967382	-3.21881	-13.2974
FINS30	0.239515	-0.24519	0.534632	0.451545	-0.0852448	-0.14417	0.47951				-2.0237	-3.18048	-0.155409	-1.18878	0.691246	-4.32601
FINS31	0.0498671	-0.218982	0.273879	0.197534	-0.155216	-0.175702	0.206974				-5.39131	-2.25069	-0.278754	-1.78577	0.131986	-2.17798
FINS32	-0.0668933	-0.128477	0.0170372	-0.218808	-0.380711	-0.421667	-0.0892186				0.920623	-1.13261	-13.8429	0.739933	0.107579	-0.788414
FINS33	-0.0492925	-0.113509	0.0590864	0.00324187	-0.108257	-0.113845	0.0179308				1.30276	-1.52055	-0.945134	-34.3933	0.0516249	-1.1575
FINS34	-0.259599	-0.155362	-0.0753073	-0.113855	-0.277554	-0.320012	-0.134879				-0.401529	-0.51528	0.511866	1.4378	0.152973	-0.578518
FINS35	-0.0324619	-0.0377914	-0.0547992	-0.0429273	-0.0385486	-0.0335246	-0.0297613				0.16418	0.450042	-0.216643	-0.102002	-0.13033	-0.112255
FRAS1	0.544645	0.575094	0.550381	0.551652	0.488197	0.484758	0.642227				0.055905	-0.0429716	0.0023095	-0.115027	-0.00704588	0.324842
FRAS2	0.0520663	-0.0980725	-0.298534	-0.388458	-0.349489	-0.257114	0.140895				-2.88361	2.04401	0.301219	-0.100316	-0.264313	-1.54799
FRAS3	0.45361	0.487416	0.468087	0.433493	0.363272	0.392628	0.585985				0.0745274	-0.0396564	-0.0739057	-0.161988	0.0808102	0.492469
FRAS4	-0.163274	-0.181115	-0.194124	-0.247924	-0.192906	-0.192982	-0.208883				0.109265	0.07183	0.277142	-0.221916	0.000395722	0.0823968
FRAS5	-0.0353072	-0.0512122	-0.0474317	-0.0392243	-0.0605967	-0.0523381	-0.0415613				0.450475	-0.073821	-0.173035	0.544876	-0.136288	-0.205908
FRAS6	0.142644	0.141239	0.125199	0.114778	0.0844957	0.0629898	0.197068				-0.00985186	-0.113569	-0.0832342	-0.263833	-0.25452	2.12856
FRAS7	0.355838	0.438899	0.407364	0.41655	0.303841	0.297287	0.518351				0.233426	-0.0718505	0.0225485	-0.270578	-0.0215689	0.743603
FRAS8	0.0414537	0.18005	0.204335	0.112531	0.150047	0.189987	0.328985				3.3434	0.134876	-0.449282	0.333386	0.26618	0.731626
FRAS9	-0.375438	-0.361395	-0.0518616	-0.18812	-0.116799	0.168951	0.270395				-0.0374056	-0.856496	2.62735	-0.379126	-2.44651	0.60044
FRAS10	-0.0369667	-0.0987986	-0.00424811	0.171221	0.118001	0.0878615	0.230359				1.67263	-0.957002	-41.3053	-0.310828	-0.255416	1.62184
FRAS11	0.3263	0.379035	0.355526	0.349607	0.281807	0.258996	0.416841				0.161614	-0.0620227	-0.0166495	-0.193932	-0.0809435	0.609448
FRAS12	0.143138	0.0456571	0.134708	0.321632	0.320287	0.271951	0.34962				-0.681028	1.95043	1.38762	-0.0041826	-0.150914	0.285599
FRAS13	-0.273698	-0.292186	-0.196561	0.0396916	0.19751	0.0693213	0.198123				0.0675499	-0.327274	-1.20193	3.97612	-0.649024	1.85803
FRAS14	-0.353416	-0.478506	-0.378062	-0.637888	-0.722412	-0.699325	-0.412138				0.353947	-0.20991	0.687256	0.132506	-0.0319588	-0.410663
FRAS15	-0.571474	-0.668395	-0.613475	-0.637279	-0.571619	-0.535792	-0.488415				0.169598	-0.0821677	0.0388017	-0.103031	-0.0626762	-0.0884251
FRAS16	0.0203462	0.0244912	0.0323652	0.0382797	-0.137673	-0.178898	0.0608286				0.203727	0.321502	0.182742	-4.59649	0.299441	-1.34002
FRAS17	0.33555	0.405237	0.379989	0.386953	0.299312	0.352816	0.57999				0.207679	-0.0623038	0.0183284	-0.226491	0.178758	0.643888
FRAS18	0.273141	0.352221	0.325857	0.322922	0.232997	0.201598	0.373507				0.289518	-0.0748487	-0.0090088	-0.278472	-0.134761	0.852732
FRAS19	-0.386417	-0.489946	-0.426289	-0.339662	-0.156677	-0.22319	-0.103599				0.267919	-0.129925	-0.203212	-0.538726	0.424524	-0.535827
FRAS20	0.492088	0.436324	0.484016	0.530235	0.440703	0.392186	0.572502				-0.113321	0.109303	0.0954915	-0.168854	-0.110091	0.459772
FRAS21	0.0911471	-0.0409484	0.0256055	0.120931	0.0730395	0.0669399	0.174287				-1.44926	-1.62531	3.72286	-0.396024	-0.0835112	1.60363
FRAS22	0.434072	0.475399	0.448225	0.394847	0.298894	0.341961	0.556603				0.0952073	-0.0571603	-0.119088	-0.243013	0.144089	0.627681
FRAS23	0.443257	0.393771	0.426842	0.46228	0.37379	0.347965	0.505661				-0.111641	0.0839848	0.0830222	-0.19142	-0.0690899	0.453197
FRAS24	-0.336528	-0.374518	-0.251041	-0.294775	-0.334407	-0.2422	-0.273874				0.112888	-0.329697	0.17421	0.134448	-0.275733	0.130777
FRAS25	0.0202444	-0.314494	-0.198414	0.0105499	-0.000998621	-0.0101405	0.0434563				-16.5349	-0.369101	-1.05317	-1.09466	9.15448	-5.28543
FRAS26	0.438386	0.525137	0.499032	0.491155	0.40132	0.40506	0.590219				0.197888	-0.0497116	-0.0157847	-0.182906	0.0093213	0.457114
FRAS27	0.435162	0.482058	0.436609	0.460966	0.343827	0.329652	0.544104				0.107767	-0.0942815	0.0557866	-0.254116	-0.0412267	0.65054
FRAS28	0.55337	0.60358	0.568732	0.588717	0.481229	0.456012	0.63851				0.090734	-0.0577352	0.0351401	-0.18258	-0.052402	0.400204
FRAS29	0.556723	0.607973	0.576506	0.594029	0.484255	0.472354	0.658177				0.0920565	-0.0517572	0.0303944	-0.184795	-0.0245764	0.393397
FRAS30	0.658815	0.706033	0.677172	0.689664	0.590474	0.573429	0.744073				0.0716709	-0.0408782	0.0184474	-0.143824	-0.0288667	0.297585
FRAS31	-0.0634867	-0.0633734	-0.0511191	-0.0804125	-0.0664073	-0.064138	-0.052886				-0.0017858	-0.193366	0.573043	-0.174167	-0.0341717	-0.175435
FRAS32	0.300002	0.411897	0.381625	0.387062	0.272405	0.264008	0.481769				0.37298	-0.0734936	0.0142477	-0.296225	-0.0308258	0.824829
FRAS33	0.062526	0.105854	0.092244	0.0878061	0.0431595	0.0276202	0.160219				0.692959	-0.128572	-0.0481107	-0.508468	-0.360044	4.8008
FRAS34	0.389055	0.417381	0.380478	0.376074	0.270187	0.271211	0.49489				0.072808	-0.0884166	-0.0115736	-0.281561	0.00379149	0.824741
FRAS35		-0.0285714	-0.0285714								#DIV/0!	1.09288e-15	-1	#DIV/0!	#DIV/0!	#DIV/0!
UKGS1	0.226074	0.223749	0.173207	0.21186	0.198985	0.193175	0.210463				-0.0102832	-0.225889	0.223164	-0.0607715	-0.0291979	0.0894891
UKGS2	0.190419	-0.333354	0.0100252	-0.0391936	-0.0325675	-0.0694726	-0.0802772				-2.75064	-1.03007	-4.90949	-0.16906	1.13319	0.155523
UKGS3	0.253727	0.19729	0.156273	0.164216	0.189573	0.199053	0.225883				-0.222431	-0.207901	0.0508229	0.154414	0.0500064	0.134793
UKGS4	-0.0997547	-0.149615	-0.155261	-0.0820457	-0.0792525	-0.0800681	-0.114378				0.499827	0.037735	-0.471561	-0.0340449	0.0102919	0.428503
UKGS5	-0.0332388	-0.0265063	-0.0286531	-0.026481	-0.0199511	-0.0193092	-0.021015				-0.202549	0.0809907	-0.0758065	-0.246588	-0.0321756	0.0883406
UKGS6	-0.145136	-0.20105	-0.246402	-0.210908	-0.153327	-0.189694	-0.184284				0.385249	0.225577	-0.144051	-0.273015	0.237189	-0.0285217
UKGS7	-0.188527	-0.281388	-0.3406	-0.278571	-0.188899	-0.22572	-0.203838				0.492563	0.210429	-0.182118	-0.321901	0.194927	-0.0969421
UKGS8	-0.256183	-0.019757	-0.0606029	-0.0537067	-0.298243	-0.384679	-0.0965205				-0.922879	2.06741	-0.113793	4.55318	0.289818	-0.749088
UKGS9	-0.369933	-0.40459	-0.388562	-0.370606	-0.296679	-0.391596	-0.486451				0.0936854	-0.0396166	-0.0462113	-0.199475	0.319931	0.242226
UKGS10	-0.112799	-0.188926	-0.238938	-0.206204	-0.153819	-0.191437	-0.18429				0.674888	0.264718	-0.136999	-0.254046	0.244566	-0.0373346
UKGS11	-0.057696	-0.175328	-0.235425	-0.183103	-0.111467	-0.160942	-0.15489				2.03883	0.342769	-0.222246	-0.391232	0.443852	-0.0376026
UKGS12	0.0028305	-0.137665	-0.189631	-0.153598	-0.0911622	-0.155777	-0.138793				-49.6364	0.377476	-0.190017	-0.406487	0.708795	-0.109028
UKGS13	-0.0185884	-0.14859	-0.197642	-0.166646	-0.114326	-0.170262	-0.150795				6.99371	0.330113	-0.156829	-0.313956	0.489265	-0.114336
UKGS14	-0.0943641	-0.112795	-0.141543	-0.139041	-0.472765	-0.544601	-0.117489				0.195319	0.254867	-0.0176748	2.40017	0.15195	-0.784267
UKGS15	-0.317264	-0.556262	-0.534777	-0.577332	-0.663023	-0.590537	-0.608397				0.75331	-0.0386243	0.079575	0.148427	-0.109326	0.0302432
UKGS16	-0.0910339	-0.0973698	-0.102863	-0.121401	-0.124144	-0.1188	-0.113165				0.0696001	0.0564126	0.180222	0.0225956	-0.0430489	-0.0474303
UKGS17	-0.0335395	-0.0613637	-0.177687	-0.174365	-0.168404	-0.22595	-0.185355				0.829595	1.89563	-0.0186931	-0.0341888	0.341718	-0.179664
UKGS18	0.0617119	-0.0995993	-0.193102	-0.0973567	-0.00581347	-0.0681264	-0.0581991				-2.61394	0.938786	-0.495827	-0.940287	10.7187	-0.14572
UKGS19	-0.0689798	-0.109063	-0.212154	-0.209203	-0.191281	-0.239476	-0.207651				0.581087	0.94524	-0.0139107	-0.0856663	0.251956	-0.132894
UKGS20	0.0962738	-0.00709084	-0.0958242	0.00480282	0.034409	-0.0573185	-0.048427				-1.07365	12.5138	-1.05012	6.16434	-2.6658	-0.155125
UKGS21	-0.104938	-0.104594	-0.133429	-0.147009	-0.139117	-0.151075	-0.135469				-0.00327027	0.275675	0.101779	-0.0536797	0.0859528	-0.103297
UKGS22	-0.207162	-0.215613	-0.255024	-0.182265	-0.174207	-0.227831	-0.208213				0.040793	0.182785	-0.285301	-0.0442135	0.30782	-0.0861064
UKGS23	0.15833	0.120538	-0.0101661	0.0639369	0.0248771	-0.0282936	-0.00434729				-0.23869	-1.08434	-7.28924	-0.610912	-2.13734	-0.846351
UKGS24	-0.318263	-0.0893889	-0.262342	-0.310632	-0.316684	-0.330275	-0.177414				-0.719136	1.93484	0.184072	0.0194836	0.0429178	-0.46283
UKGS25	-0.223064	-0.238873	-0.258417	-0.150031	-0.121248	-0.186923	-0.226995				0.0708754	0.081816	-0.419423	-0.19185	0.541659	0.214381
UKGS26	0.189704	-0.0266711	-0.112528	0.0211205	0.00796396	-0.098036	-0.0755053				-1.14059	3.2191	-1.18769	-0.622927	-13.31	-0.22982
UKGS27	-0.317573	-0.432327	-0.491536	-0.448623	-0.365051	-0.440915	-0.418958				0.361347	0.136956	-0.0873052	-0.186286	0.207818	-0.0497974
UKGS28	-0.450329	-0.545021	-0.618613	-0.553916	-0.466159	-0.585897	-0.550329				0.210273	0.135027	-0.104584	-0.15843	0.256862	-0.0607071
UKGS29	-0.254203	-0.326234	-0.375933	-0.350532	-0.296125	-0.344535	-0.321597				0.28336	0.152344	-0.0675681	-0.155214	0.163479	-0.0665764
UKGS30	0.175537	-0.00639849	-0.204979	-0.134073	-0.0192586	-0.19576	-0.120505				-1.03645	31.0355	-0.345916	-0.856358	9.16483	-0.384426
UKGS31	-0.127581	-0.17954	-0.277577	-0.253868	-0.201259	-0.278198	-0.240304				0.407263	0.546048	-0.0854147	-0.207229	0.382289	-0.136213
UKGS32	-0.119211	-0.174914	-0.268246	-0.247999	-0.199385	-0.274202	-0.237264				0.467266	0.533581	-0.0754785	-0.196023	0.375236	-0.134712
UKGS33	-0.0897475	-0.107562	-0.136591	-0.139673	-0.136296	-0.154454	-0.141449				0.198494	0.269881	0.0225672	-0.0241769	0.133223	-0.0841983
UKGS34	-0.107936	-0.147465	-0.234124	-0.21484	-0.185677	-0.250423	-0.216594				0.36623	0.587654	-0.0823655	-0.135741	0.348701	-0.135087
UKGS35	-0.0298335	-0.032058	-0.0305896	-0.0286442	-0.0278907	-0.0271621	-0.0278316				0.0745645	-0.0458053	-0.0635959	-0.0263081	-0.0261228	0.024651
GRCS1	-0.110658	0.241651	0.103763	0.272802	-0.102001	-0.194561	-0.229289				-3.18376	-0.57061	1.6291	-1.3739	0.90744	0.178496
GRCS2	-0.647735	-0.686642	-0.609501	-0.499302	-0.546067	-0.565577	-0.561769				0.0600655	-0.112345	-0.180802	0.0936592	0.0357292	-0.00673293
GRCS3	-0.307308	0.176788	0.0690224	0.25245	0.168691	0.10796	0.234689				-1.57528	-0.609574	2.65751	-0.331786	-0.360012	1.17385
GRCS4	-0.315251	-0.0383359	-0.0547553	-0.00621465	-0.0316272	-0.143151	-0.1067				-0.878396	0.428304	-0.886501	4.08913	3.52621	-0.254633
GRCS5	-0.0488381	-0.0346879	-0.0340012	-0.0284165	-0.0308185	-0.0349653	-0.0321539				-0.289736	-0.0197983	-0.164249	0.084529	0.134554	-0.0804052
GRCS6	-0.083062	-0.0618725	-0.029872	0.0220504	0.00122198	-0.0801771	-0.00997748				-0.255105	-0.517201	-1.73816	-0.944583	-66.6127	-0.875557
GRCS7	0.132832	0.00630111	0.0448048	0.0997926	0.0526901	-0.0462914	0.0236039				-0.952563	6.11061	1.22728	-0.472003	-1.87856	-1.5099
GRCS8	-0.819047	-0.844439	-0.781327	-0.650834	-0.727651	-0.803907	-0.780026				0.0310021	-0.0747385	-0.167015	0.118029	0.104798	-0.0297061
GRCS9	-0.3483	-0.173399	-0.289145	-0.276367	-0.345983	-0.324931	-0.372192				-0.502156	0.667513	-0.044192	0.251896	-0.0608461	0.14545
GRCS10	-0.194864	-0.23137	-0.344812	-0.3244	-0.309288	-0.235611	-0.378176				0.187341	0.490302	-0.0591963	-0.0465867	-0.238214	0.605087
GRCS11	0.032521	0.0036025	0.0559868	0.185634	0.134688	-0.0211034	0.116211				-0.889225	14.5411	2.31567	-0.274442	-1.15668	-6.50673
GRCS12	0.0185281	-0.134708	-0.47214	-0.463842	-0.581876	-0.360054	-0.423982				-8.27046	2.50492	-0.0175766	0.254471	-0.381219	0.177553
GRCS13	-0.0384839	-0.061763	-0.0294776	0.00912468	-0.00849282	-0.0745987	-0.0206971				0.604903	-0.52273	-1.30955	-1.93075	7.78373	-0.722554
GRCS14	-0.316216	-0.0403712	-0.0228828	0.045799	-0.0638133	-0.0658545	-0.0527619				-0.87233	-0.43319	-3.00146	-2.39333	0.0319873	-0.198811
GRCS15	-0.145507	-0.0426735	-0.129453	-0.0478738	-0.0669043	-0.0764975	-0.0658369				-0.706726	2.03357	-0.630184	0.397512	0.143387	-0.139359
GRCS16	-0.0829403	-0.0303723	-0.0298213	-0.00755259	-0.0216747	-0.0344774	-0.028228				-0.633806	-0.0181398	-0.746738	1.86983	0.590678	-0.181261
GRCS17	-0.339398	0.040016	-0.129711	-0.10987	-0.159159	0.134665	0.0365403				-1.1179	-4.24149	-0.152963	0.44861	-1.8461	-0.728658
GRCS18	0.0439276	-0.0556123	0.0421739	0.181369	0.114094	-0.097083	0.039319				-2.266	-1.75836	3.30051	-0.370931	-1.8509	-1.405
GRCS19	-0.231708	-0.204334	-0.191079	-0.0335767	-0.135964	-0.212781	-0.173722				-0.118138	-0.0648707	-0.824279	3.04936	0.564979	-0.183565
GRCS20	-0.349255	-0.388261	-0.254165	0.384372	0.00919475	-0.367993	-0.155515				0.111684	-0.345376	-2.51229	-0.976078	-41.022	-0.577396
GRCS21	-0.446191	-0.605419	0.0776285	-0.541605	0.0808151	-0.138953	-0.12895				0.356862	-1.12822	-7.97689	-1.14921	-2.7194	-0.0719932
GRCS22	0.136473	0.10057	0.163491	0.207639	0.0741335	-0.0149415	0.11085				-0.263077	0.625637	0.270031	-0.642969	-1.20155	-8.41895
GRCS23	-0.349536	-0.36017	-0.287685	0.142099	-0.145345	-0.34968	-0.21355				0.030424	-0.201253	-1.49394	-2.02285	1.40586	-0.389297
GRCS24	-0.720896	-0.823221	-0.71923	-0.815463	-0.748737	-0.577757	-0.694898				0.141942	-0.126322	0.1338	-0.0818255	-0.228357	0.202751
GRCS25	-0.217171	-0.087755	-0.0296348	0.00806009	-0.0800518	-0.1537	-0.107801				-0.595917	-0.6623	-1.27198	-10.9319	0.920014	-0.298631
GRCS26	-0.327908	-0.266887	-0.169409	0.23083	-0.0711227	-0.321283	-0.0690922				-0.186092	-0.365239	-2.36256	-1.30812	3.51731	-0.784949
GRCS27	-0.206645	-0.259737	-0.186131	0.211292	-0.0481654	-0.255135	-0.102656				0.256927	-0.283386	-2.13518	-1.22796	4.29707	-0.597641
GRCS28	-0.334727	-0.174324	-0.10686	0.365826	0.0593561	-0.22907	0.00850133				-0.479206	-0.387002	-4.42341	-0.837748	-4.85924	-1.03711
GRCS29	0.161937	0.066046	0.195984	0.380205	0.343401	0.0425905	0.268365				-0.592149	1.96738	0.939985	-0.0968002	-0.875975	5.30106
GRCS30	0.233488	0.129576	0.229385	0.387447	0.220563	5.87747e-05	0.208051				-0.445042	0.770272	0.689072	-0.430728	-0.999734	3538.81
GRCS31	-0.0476849	-0.0406558	-0.0370023	-0.0260038	-0.0342499	-0.0332963	-0.0299495				-0.147408	-0.0898645	-0.297238	0.317113	-0.027844	-0.100516
GRCS32	-0.13399	-0.0310267	-0.0418749	-0.0384754	-0.0353308	0.0124455	0.0109349				-0.76844	0.34964	-0.0811831	-0.08173	-1.35226	-0.121377
GRCS33	0.475994	0.369618	0.361996	0.444085	0.420854	0.426141	0.419561				-0.223482	-0.0206226	0.226768	-0.0523103	0.0125617	-0.0154407
GRCS34	0.0431188	0.0109106	0.0797373	0.167459	-0.0301096	-0.146731	0.000913913				-0.746964	6.30825	1.10013	-1.1798	3.87325	-1.00623
GRCS35	-0.0297316	-0.0302095	-0.0306895	-0.0302165	-0.0319396	-0.0286854	-0.0306555				0.0160723	0.0158899	-0.0154113	0.0570243	-0.101885	0.0686767
HRVS1	0.0876338	-0.439827	-0.607307	-0.610399	-0.752514	-0.837047	-0.725467				-6.01892	0.380786	0.00509141	0.232824	0.112334	-0.133301
HRVS2	-0.587159	-0.48534	-0.433064	-0.322874	-0.347797	-0.26094	-0.354032				-0.17341	-0.107711	-0.254443	0.0771924	-0.249736	0.35676
HRVS3	0.265718	-0.0468173	-0.48465	-0.422679	-0.552189	-0.607146	-0.433097				-1.17619	9.35194	-0.127868	0.306402	0.0995257	-0.286667
HRVS4	-0.104447	-0.147586	-0.170061	-0.101011	-0.422721	-0.431139	-0.309005				0.413023	0.152288	-0.406034	3.18491	0.0199144	-0.283283
HRVS5	-0.04503	-0.148056	-0.129589	-0.148559	-0.163014	-0.182784	-0.109833				2.28794	-0.124728	0.146385	0.097301	0.121276	-0.399112
HRVS6	-0.447612	-0.378836	-0.425597	-0.313105	-0.463694	-0.668751	-0.491348				-0.15365	0.123433	-0.264316	0.480953	0.442226	-0.265276
HRVS7	-0.327453	-0.514603	-0.407607	-0.429169	-0.544718	-0.597811	-0.453552				0.571529	-0.207918	0.0528975	0.26924	0.0974684	-0.241311
HRVS8	-0.027108	-0.440024	-0.457305	0.0528411	-0.0561523	-0.486375	-0.286776				15.2323	0.0392729	-1.11555	-2.06266	7.66171	-0.410382
HRVS9	-0.40284	-0.433086	-0.402118	-0.579102	-0.460917	-0.390873	-0.349233				0.0750811	-0.0715039	0.440128	-0.204083	-0.151966	-0.10653
HRVS10	-0.309927	-0.220225	-0.273828	-0.402176	-0.228822	-0.301851	-0.23518				-0.28943	0.243401	0.468716	-0.431039	0.319152	-0.220876
HRVS11	-0.680813	-0.384774	-0.676848	-0.663445	-0.676604	-0.758257	-0.661305				-0.434832	0.759082	-0.0198018	0.0198335	0.120681	-0.127861
HRVS12	-0.569972	-0.560731	-0.588997	-0.579414	-0.594336	-0.648198	-0.588156				-0.0162127	0.0504099	-0.016271	0.0257536	0.0906263	-0.0926296
HRVS13	0.103717	-0.422491	-0.433066	-0.272376	-0.405672	-0.419567	-0.339825				-5.0735	0.0250304	-0.371051	0.489379	0.0342527	-0.190058
HRVS14	-0.419361	-0.460227	-0.41294	-0.500191	-0.521768	-0.516301	-0.330768				0.0974471	-0.102747	0.211291	0.0431382	-0.0104769	-0.35935
HRVS15	-0.324997	-0.352676	-0.440665	-0.359938	-0.165909	-0.339252	-0.209239				0.0851659	0.249489	-0.183193	-0.539063	1.04481	-0.383234
HRVS16	-0.0361914	-0.0861418	-0.00461623	0.0169326	-0.0947732	-0.0909529	0.0136719				1.38017	-0.946411	-4.66806	-6.59708	-0.0403092	-1.15032
HRVS17	0.153626	-0.405819	0.188027	0.246297	0.00389796	-0.097459	0.122665				-3.64161	-1.46333	0.309905	-0.984174	-26.0026	-2.25863
HRVS18	0.0319632	-0.175855	0.186401	0.284327	-0.124672	-0.175915	0.249239				-6.5018	-2.05997	0.525356	-1.43848	0.411029	-2.41681
HRVS19	0.191097	-0.163843	0.117865	0.121878	-0.113356	-0.00510471	0.0958883				-1.85738	-1.71938	0.0340503	-1.93008	-0.954968	-19.7843
HRVS20	0.420555	0.282678	0.427597	0.321827	0.367022	0.185324	0.270687				-0.327845	0.512664	-0.247358	0.140431	-0.495059	0.46061
HRVS21	0.281441	-0.193937	-0.385027	-0.339575	-0.569864	-0.673579	-0.549772				-1.68909	0.985319	-0.118049	0.678169	0.181999	-0.183804
HRVS22	0.165405	0.122705	0.264777	0.158432	0.0947458	0.134514	0.236568				-0.25815	1.15783	-0.40164	-0.401979	0.419734	0.758693
HRVS23	-0.541909	-0.554669	-0.117231	-0.126956	-0.0524133	-0.0672563	0.017319				0.0235466	-0.788647	0.0829591	-0.587154	0.28319	-1.25751
HRVS24	-0.346391	-0.319261	-0.304771	-0.318985	-0.458363	-0.559605	-0.370348				-0.07832	-0.0453882	0.0466403	0.436941	0.220879	-0.338197
HRVS25	-0.182071	-0.195295	-0.1908	-0.113838	-0.14711	-0.202492	-0.143228				0.0726291	-0.0230151	-0.403364	0.292275	0.37646	-0.292673
HRVS26	-0.293717	-0.665849	-0.0163308	0.0609754	0.163763	0.0145926	0.270711				1.26698	-0.975474	-4.73376	1.68572	-0.910892	17.5513
HRVS27	0.286684	-0.119044	0.183564	0.278648	-0.0624288	0.068805	0.191175				-1.41525	-2.54198	0.51799	-1.22404	-2.10214	1.77851
HRVS28	0.385735	0.208369	0.467045	0.510028	0.280528	0.156864	0.460973				-0.459812	1.24143	0.0920306	-0.449975	-0.440825	1.93868
HRVS29	0.424192	0.114209	-0.0586818	0.0045716	-0.269744	-0.415312	-0.243419				-0.730762	-1.51381	-1.0779	-60.0044	0.539649	-0.413889
HRVS30	0.458658	-0.274826	0.316661	0.453072	-0.112959	0.178943	0.36438				-1.59919	-2.15223	0.430779	-1.24932	-2.58414	1.03629
HRVS31	-0.244223	-0.288037	-0.140334	-0.19886	-0.102122	-0.149954	-0.0296341				0.179401	-0.51279	0.417044	-0.486463	0.468385	-0.80238
HRVS32	-0.0684829	-0.317704	0.0743522	0.120871	-0.0872912	0.0177984	0.0751264				3.63918	-1.23403	0.625651	-1.72219	-1.2039	3.22096
HRVS33	-0.56152	-0.656459	-0.341071	-0.459098	-0.0247338	-0.17206	-0.014388				0.169076	-0.480439	0.346049	-0.946125	5.95648	-0.916378
HRVS34	0.0642269	-0.430681	0.182495	0.0583687	-0.00879356	-0.302566	0.123073				-7.70561	-1.42374	-0.680163	-1.15066	33.4077	-1.40676
HRVS35	-0.0255731	-0.0355397	-0.0277385	-0.0299423	-0.0384934	-0.0304215	-0.0280206				0.389727	-0.219507	0.0794504	0.285587	-0.209696	-0.0789204
HUNS1	-0.0626722	-0.256606	-0.299689	-0.339338	-0.472695	-0.459023	-0.233731				3.09442	0.167893	0.1323	0.392993	-0.0289232	-0.490809
HUNS2	-0.349877	-0.232816	-0.202617	-0.146177	-0.199191	-0.179805	-0.174312				-0.334577	-0.129711	-0.278554	0.362669	-0.0973245	-0.0305526
HUNS3	-0.144638	-0.207731	-0.353937	-0.319939	-0.376091	-0.346998	-0.24964				0.436209	0.703825	-0.0960584	0.175509	-0.0773547	-0.280573
HUNS4	-0.307365	-0.314258	-0.277522	-0.259946	-0.311308	-0.24504	-0.196108				0.0224263	-0.1169	-0.0633309	0.197588	-0.212869	-0.199691
HUNS5	-0.0985306	-0.111988	-0.0875147	-0.089967	-0.115882	-0.111929	-0.0950651				0.136578	-0.218533	0.0280222	0.288049	-0.0341125	-0.150666
HUNS6	-0.235721	-0.228574	-0.137555	-0.169255	-0.167495	-0.150889	-0.176587				-0.0303176	-0.398204	0.230448	-0.0103965	-0.0991452	0.170313
HUNS7	-0.235136	-0.20211	-0.329425	-0.458355	-0.4755	-0.504385	-0.604922				-0.140457	0.62993	0.39138	0.0374052	0.0607456	0.199327
HUNS8	-0.272448	-0.228934	-0.153391	-0.191938	-0.246099	-0.129582	-0.21499				-0.159714	-0.329979	0.251301	0.282182	-0.473455	0.659097
HUNS9	-0.599465	-0.54399	-0.496997	-0.524666	-0.53431	-0.481983	-0.520193				-0.0925398	-0.0863867	0.0556723	0.0183824	-0.0979348	0.0792775
HUNS10	-0.524287	-0.562773	-0.581499	-0.539368	-0.552304	-0.555199	-0.596702				0.0734075	0.0332739	-0.0724521	0.0239832	0.00524226	0.0747524
HUNS11	-0.550811	-0.571212	-0.385955	-0.56766	-0.510446	-0.464773	-0.407191				0.0370385	-0.324323	0.470793	-0.10079	-0.0894763	-0.123893
HUNS12	-0.665574	-0.689274	-0.642742	-0.682305	-0.659103	-0.620916	-0.661418				0.0356073	-0.067508	0.0615524	-0.0340042	-0.0579377	0.0652283
HUNS13	-0.611816	-0.710068	-0.651243	-0.717545	-0.67175	-0.630885	-0.69516				0.160592	-0.082844	0.101808	-0.0638212	-0.0608346	0.101881
HUNS14	-0.736176	-0.782449	-0.748332	-0.824064	-0.837212	-0.824334	-0.870825				0.0628561	-0.0436033	0.101201	0.0159557	-0.0153821	0.056398
HUNS15	-0.897573	-0.898105	-0.879875	-0.898709	-0.915025	-0.903041	-0.889445				0.000592662	-0.0202986	0.0214052	0.0181551	-0.0130965	-0.0150561
HUNS16	-0.169639	-0.351724	-0.279051	-0.332553	-0.293481	-0.260616	-0.277263				1.07336	-0.206618	0.191727	-0.117492	-0.111981	0.0638725
HUNS17	-0.325262	-0.300146	-0.314625	-0.353419	-0.28502	-0.288017	-0.425085				-0.0772167	0.04824	0.123302	-0.193537	0.0105169	0.475903
HUNS18	-0.203383	-0.223531	-0.182229	-0.229994	-0.220215	-0.163779	-0.233426				0.0990643	-0.184771	0.262116	-0.0425166	-0.256279	0.425253
HUNS19	-0.239948	-0.295331	-0.337618	-0.429725	-0.368192	-0.459542	-0.521842				0.23081	0.143186	0.272814	-0.14319	0.248104	0.135569
HUNS20	-0.319883	-0.383639	-0.308977	-0.47597	-0.504672	-0.602034	-0.678032				0.199312	-0.194615	0.540468	0.0603023	0.192921	0.126235
HUNS21	-0.108744	-0.136044	-0.09273	-0.112329	-0.125955	-0.143514	-0.117894				0.251048	-0.318384	0.211351	0.12131	0.139401	-0.178519
HUNS22	-0.266736	-0.326273	-0.313358	-0.3148	-0.30027	-0.32456	-0.339971				0.223205	-0.0395832	0.00460184	-0.0461551	0.0808918	0.0474829
HUNS23	-0.368137	-0.438012	-0.394923	-0.435731	-0.362554	-0.400933	-0.525789				0.189808	-0.0983747	0.103333	-0.167941	0.105859	0.311413
HUNS24	-0.121994	-0.125743	-0.0851871	-0.0640553	-0.0578823	-0.0661272	-0.0557342				0.030731	-0.322528	-0.248064	-0.0963697	0.142442	-0.157167
HUNS25	-0.370021	-0.364063	-0.270989	-0.180643	-0.200496	-0.135846	-0.208541				-0.0161021	-0.255652	-0.333395	0.109903	-0.32245	0.535126
HUNS26	-0.169181	-0.271607	-0.193476	-0.285758	-0.211243	-0.243534	-0.334297				0.605426	-0.287664	0.47697	-0.26076	0.152859	0.372693
HUNS27	-0.230027	-0.268059	-0.243602	-0.290658	-0.27782	-0.266828	-0.274499				0.165337	-0.0912386	0.193166	-0.0441674	-0.039566	0.02875
HUNS28	-0.242887	-0.232022	-0.201589	-0.271528	-0.299751	-0.300215	-0.295724				-0.0447321	-0.131166	0.346938	0.103942	0.00154839	-0.0149597
HUNS29	-0.313075	-0.332778	-0.301915	-0.363913	-0.37383	-0.351768	-0.378891				0.0629339	-0.0927433	0.205349	0.0272503	-0.0590164	0.0771036
HUNS30	-0.518074	-0.554565	-0.525407	-0.548235	-0.540931	-0.515523	-0.506689				0.0704365	-0.0525789	0.043449	-0.0133232	-0.0469704	-0.0171373
HUNS31	-0.213511	-0.200623	-0.191038	-0.207731	-0.204267	-0.236459	-0.250917				-0.0603607	-0.0477768	0.0873813	-0.0166745	0.157595	0.0611458
HUNS32	-0.229237	-0.2542	-0.239912	-0.251504	-0.228838	-0.250727	-0.250986				0.108897	-0.0562055	0.0483147	-0.0901197	0.0956507	0.00103321
HUNS33	-0.118597	-0.116676	-0.0940503	-0.103384	-0.0921114	-0.0872782	-0.0803579				-0.0161998	-0.193917	0.0992388	-0.109034	-0.0524708	-0.0792906
HUNS34	-0.32718	-0.37813	-0.35091	-0.377588	-0.367865	-0.358479	-0.379813				0.155724	-0.0719844	0.0760247	-0.0257494	-0.0255147	0.0595117
HUNS35	-0.0285714	-0.0285714									1.93515e-07	-1	#DIV/0!	#DIV/0!	#DIV/0!	#DIV/0!
INOS1	0.522024	0.62088	0.64843	0.737352	0.587647	0.576563	0.41533				0.18937	0.0443717	0.137134	-0.20303	-0.0188617	-0.279645
INOS2	0.340912	0.536069	0.45034	0.473784	-0.0149543	-0.159539	0.00319351				0.572458	-0.159923	0.05206	-1.03156	9.66845	-1.02002
INOS3	-0.0580401	0.150588	0.359121	0.451202	0.102658	0.0232564	-0.189925				-3.59456	1.38479	0.256404	-0.772479	-0.773457	-9.16659
INOS4	-0.149519	0.0335623	-0.0284466	-0.00378815	-0.151585	-0.147901	-0.20123				-1.22447	-1.84758	-0.866833	39.0156	-0.0243014	0.360566
INOS5	-0.0839204	-0.054861	-0.0610697	-0.0556909	-0.199227	-0.162942	-0.210113				-0.346274	0.113172	-0.0880772	2.57738	-0.18213	0.289496
INOS6	0.298082	0.406313	0.358058	0.414146	0.072658	-0.02888	0.0412984				0.36309	-0.118762	0.156644	-0.824559	-1.39748	-2.43
INOS7	0.268606	0.224512	-0.475352	-0.181684	-0.375028	0.0491014	-0.11034				-0.164157	-3.11727	-0.617792	1.06418	-1.13093	-3.2472
INOS8	-0.286867	0.425229	0.475228	0.496056	0.178788	0.171029	0.238093				-2.48232	0.117582	0.0438265	-0.639581	-0.0433991	0.392123
INOS9	0.24225	-0.097511	0.339357	0.426112	0.0948063	-0.256352	0.0144361				-1.40252	-4.48019	0.255644	-0.777508	-3.70396	-1.05631
INOS10	0.261917	0.369628	0.375672	0.429542	0.0832417	-0.0394258	0.0219441				0.411238	0.0163514	0.143398	-0.806208	-1.47363	-1.55659
INOS11	0.374052	0.486878	0.439692	0.482886	0.146657	0.0443662	0.114079				0.301632	-0.0969153	0.0982359	-0.696291	-0.697483	1.57129
INOS12	0.374331	0.570321	0.495527	0.232564	0.245774	0.152314	0.0685538				0.523575	-0.131145	-0.530673	0.0568014	-0.380269	-0.549917
INOS13	0.090455	0.178912	0.130227	0.166749	-0.0173427	-0.0467533	-0.0224253				0.977908	-0.272118	0.280452	-1.10401	1.69585	-0.520349
INOS14	0.171715	0.286809	0.264809	0.317327	0.00228706	-0.171265	-0.0166312				0.670261	-0.0767071	0.198325	-0.992793	-75.8844	-0.902892
INOS15	0.149324	0.235429	0.186448	0.206112	-0.00550151	-0.465499	-0.022045				0.576636	-0.208051	0.105467	-1.02669	83.613	-0.952642
INOS16	0.0221758	0.0484577	0.0471917	0.0867781	0.00474734	-0.00620275	0.0146633				1.18517	-0.0261258	0.83884	-0.945293	-2.30657	-3.36401
INOS17	0.0453201	0.183282	0.15754	-0.0141458	-0.00787904	-0.0138255	-0.0129947				3.04417	-0.140452	-1.08979	-0.44301	0.754716	-0.060088
INOS18	0.274694	0.429923	0.395884	0.480606	0.0733189	-0.123728	-0.000391562				0.565099	-0.0791758	0.214008	-0.847445	-2.68754	-0.996835
INOS19	0.256211	0.3737	0.33981	0.369258	0.0533444	-0.015596	0.0415483				0.458562	-0.0906887	0.08666	-0.855536	-1.29237	-3.66403
INOS20	0.423484	0.506487	0.566474	0.601395	0.332596	0.334305	0.259736				0.196	0.118438	0.0616464	-0.44696	0.00513954	-0.223058
INOS21	0.345218	0.420514	0.467984	0.509222	0.206822	0.207925	0.165697				0.21811	0.112886	0.0881183	-0.593846	0.00533031	-0.20309
INOS22	0.260067	0.360288	0.323812	0.353103	0.0586116	-0.0156873	0.0422853				0.385366	-0.101242	0.0904581	-0.83401	-1.26765	-3.69551
INOS23	0.300223	0.416508	0.388684	0.437635	0.0946976	0.0332801	0.112282				0.387329	-0.0668026	0.12594	-0.783615	-0.648565	2.37384
INOS24	0.14774	0.211827	0.188224	0.223462	-0.0217529	-0.0662428	-0.0257995				0.43378	-0.111425	0.18721	-1.09735	2.04523	-0.610531
INOS25	0.172192	0.273488	0.25036	0.174969	0.0138159	-0.0105285	0.0520449				0.588274	-0.0845675	-0.301131	-0.921038	-1.76206	-5.94324
INOS26	0.275085	0.359659	0.32872	0.326727	0.0692256	0.111234	0.17023				0.307447	-0.086023	-0.00606314	-0.788124	0.606833	0.530378
INOS27	0.182403	0.286881	0.27284	0.316225	0.0384604	0.0503706	0.0874695				0.572785	-0.048945	0.159012	-0.878377	0.309675	0.73652
INOS28	0.346626	0.384961	0.4036	0.436444	0.179808	0.225877	0.186028				0.110594	0.0484178	0.0813771	-0.588016	0.256211	-0.176419
INOS29	0.14701	0.141846	0.19992	0.230525	0.0327709	0.0368334	-0.0185187				-0.0351257	0.409413	0.153088	-0.857842	0.12397	-1.50277
INOS30	0.28064	0.406615	0.378703	0.430686	0.0983935	0.0613914	0.117243				0.448888	-0.0686465	0.137266	-0.771542	-0.376063	0.909765
INOS31	0.139879	0.212079	0.208339	0.241979	-0.0134548	-0.056716	-0.0182112				0.516165	-0.0176363	0.161466	-1.0556	3.21531	-0.678906
INOS32	0.0398636	0.045714	0.0410323	0.0770957	0.0261911	0.0277403	0.00135762				0.146759	-0.102413	0.878903	-0.660278	0.0591476	-0.95106
INOS33	0.0311958	0.0588308	0.0583015	0.0985398	-0.0132092	-0.0388908	-0.024951				0.885859	-0.0089973	0.690176	-1.13405	1.94422	-0.358434
INOS34	0.101841	0.140222	0.126373	0.156514	0.00853114	0.00288484	0.0198242				0.376875	-0.0987657	0.238507	-0.945493	-0.661846	5.87186
INOS35											#DIV/0!	#DIV/0!	#DIV/0!	#DIV/0!	#DIV/0!	#DIV/0!
INDS1	0.711959	0.690824	0.669826	0.528795	0.501084	0.589292	0.502426				-0.0296866	-0.0303955	-0.210548	-0.0524053	0.176035	-0.147408
INDS2	0.685621	0.509182	0.563707	0.43292	0.33778	0.435364	0.317488				-0.257342	0.107085	-0.232013	-0.219763	0.288898	-0.270753
INDS3	0.42549	0.197461	0.204634	0.0631599	0.0871999	0.158718	0.0817781				-0.53592	0.0363232	-0.691352	0.380622	0.82016	-0.484758
INDS4	0.288293	-0.136762	0.0631902	0.0622718	-0.101882	-0.283078	-0.190411				-1.47439	-1.46205	-0.0145336	-2.63609	1.77848	-0.327356
INDS5	0.144062	-0.0641448	0.00469273	-0.000669196	-0.018304	-0.0303426	-0.0250359				-1.44526	-1.07316	-1.1426	26.3523	0.6577	-0.174893
INDS6	0.365192	0.00375571	-0.0318034	0.0800753	0.0513055	0.100952	0.0303553				-0.989716	-9.468	-3.51782	-0.359284	0.96766	-0.699309
INDS7	0.378807	0.186172	0.219603	-0.0316231	-0.0501871	0.0517561	-0.015424				-0.50853	0.17957	-1.144	0.587037	-2.03126	-1.29801
INDS8	0.595238	0.189489	0.314226	0.311767	0.258816	0.305228	0.241816				-0.681658	0.658276	-0.00782566	-0.169841	0.179324	-0.207752
INDS9	0.597587	0.152255	0.396595	0.323793	0.195904	0.301037	0.176348				-0.745217	1.6048	-0.183567	-0.394971	0.536655	-0.4142
INDS10	0.421271	0.0075961	0.179292	0.0227954	-0.127347	0.0672376	-0.0982337				-0.981969	22.6032	-0.872859	-6.58651	-1.52799	-2.46099
INDS11	0.586073	0.415528	0.391216	0.16451	0.025281	0.23931	0.0552557				-0.290996	-0.058509	-0.579492	-0.846325	8.46601	-0.769104
INDS12	0.686976	0.488037	0.554385	0.416865	0.355261	0.507358	0.388885				-0.289586	0.135949	-0.248058	-0.147779	0.428127	-0.233509
INDS13	0.289178	0.0873619	0.0198905	-0.0215423	-0.079868	0.0100354	-0.0692435				-0.697896	-0.77232	-2.08304	2.7075	-1.12565	-7.89993
INDS14	0.332411	0.379789	0.364761	-0.0575105	-0.139921	-0.025593	-0.126745				0.142527	-0.0395695	-1.15767	1.43296	-0.817089	3.95235
INDS15	0.157702	-0.226505	-0.303586	-0.0191611	-0.161531	-0.0163305	-0.142859				-2.43629	0.340307	-0.936884	7.43018	-0.898902	7.74801
INDS16	0.301743	0.00407748	-0.00888167	-0.0717392	-0.160663	-0.0323476	-0.144175				-0.986487	-3.17823	7.07722	1.23955	-0.798662	3.45704
INDS17	0.440009	0.312552	0.29964	0.252991	0.0549255	0.238154	0.160844				-0.289669	-0.0413118	-0.155683	-0.782895	3.33594	-0.324623
INDS18	0.216617	0.0342532	-0.0213944	-0.00704395	-0.173736	0.0882782	-0.117089				-0.841872	-1.6246	-0.670758	23.6645	-1.50812	-2.32636
INDS19	0.233158	0.0775576	0.0479193	-0.0391467	-0.0524709	-0.0318365	-0.0687599				-0.667361	-0.382146	-1.81693	0.340366	-0.393254	1.15978
INDS20	0.688318	0.458728	0.462981	0.124505	-0.0446499	0.102632	-0.0872998				-0.333553	0.00927244	-0.73108	-1.35862	-3.29859	-1.85061
INDS21	0.781606	0.55686	0.594757	0.268024	0.161897	0.320786	0.0789832				-0.287544	0.0680538	-0.549355	-0.395963	0.981424	-0.753782
INDS22	0.406715	-0.0668531	-0.0572322	0.0184256	-0.00781676	0.192236	0.0716546				-1.16437	-0.143911	-1.32195	-1.42423	-25.5929	-0.627258
INDS23	0.746974	0.511255	0.503428	0.0900783	-0.0677396	0.0853565	-0.0769254				-0.315565	-0.01531	-0.82107	-1.75201	-2.26007	-1.90123
INDS24	-0.139137	-0.149024	-0.116762	-0.0789871	-0.0895075	-0.126488	-0.0451245				0.0710612	-0.216491	-0.323519	0.133191	0.413154	-0.64325
INDS25	-0.100153	-0.21054	-0.139259	-0.0818908	-0.0378561	0.00387047	-0.0408756				1.10218	-0.338565	-0.411952	-0.537725	-1.10224	-11.5609
INDS26	0.268194	0.272126	0.280355	0.0153227	-0.00882669	0.041258	-0.0528849				0.0146624	0.0302381	-0.945345	-1.57605	-5.67423	-2.28181
INDS27	0.418192	0.37985	0.374407	-0.0706055	-0.186059	-0.0198706	-0.148614				-0.0916832	-0.0143297	-1.18858	1.6352	-0.893203	6.4791
INDS28	0.677727	0.465156	0.452847	0.164651	0.021885	0.25646	0.139329				-0.313653	-0.0264625	-0.63641	-0.867082	10.7185	-0.456723
INDS29	-0.19489	-0.199069	-0.223677	-0.164828	-0.165048	-0.0998922	-0.172701				0.0214428	0.123619	-0.263099	0.00133165	-0.394768	0.72887
INDS30	-0.365557	-0.37738	-0.382828	-0.219671	-0.328598	-0.0811413	-0.287392				0.0323443	0.0144345	-0.426188	0.495865	-0.753068	2.54187
INDS31	-0.0572519	-0.0571316	-0.203676	-0.0323846	-0.0530731	-0.0461263	-0.02835				-0.00210242	2.56504	-0.841	0.63884	-0.130892	-0.385382
INDS32	-0.197687	-0.193304	-0.222472	0.0149375	-0.114206	0.0711735	0.00684031				-0.0221696	0.150893	-1.06714	-8.6456	-1.6232	-0.903892
INDS33	-0.173673	-0.176632	-0.205982	0.0380425	-0.00463523	0.0243087	-0.00720954				0.0170395	0.166165	-1.18469	-1.12184	-6.24434	-1.29658
INDS34	0.425113	0.171851	0.18316	0.111737	0.0797239	0.197066	0.0782524				-0.595751	0.0658066	-0.38995	-0.286505	1.47186	-0.602913
INDS35											#DIV/0!	#DIV/0!	#DIV/0!	#DIV/0!	#DIV/0!	#DIV/0!
IRES1	-0.626518	-0.711912	-0.658523	-0.612936	-0.575601	-0.626683	-0.491782				0.136299	-0.0749927	-0.0692263	-0.0609128	0.0887471	-0.215263
IRES2	-0.114292	-0.203484	-0.212377	-0.247296	-0.147911	-0.232237	-0.151365				0.780389	0.0437035	0.164416	-0.401886	0.570111	-0.348228
IRES3	-0.496969	-0.394679	-0.52774	-0.496717	-0.655818	-0.616855	-0.491587				-0.205829	0.337138	-0.0587846	0.320305	-0.0594106	-0.203075
IRES4	-0.108531	-0.0901603	-0.0902278	-0.0831415	-0.0954004	-0.0882889	-0.0838593				-0.169264	0.000748799	-0.0785379	0.147447	-0.0745441	-0.0501716
IRES5	-0.052645	-0.0487272	-0.06288	-0.0563881	-0.0427901	-0.0432506	-0.0400634				-0.0744185	0.29045	-0.103243	-0.24115	0.0107631	-0.0736913
IRES6	-0.445817	-0.390426	-0.424846	-0.332426	-0.474936	-0.463464	-0.431595				-0.124246	0.0881601	-0.217536	0.428695	-0.0241549	-0.0687628
IRES7	-0.609127	-0.770653	-0.681673	-0.733064	-0.650103	-0.690209	-0.594809				0.265176	-0.115461	0.0753906	-0.113171	0.0616922	-0.13822
IRES8	-0.168001	-0.837217	-0.462093	-0.719651	-0.599883	-0.592632	-0.539866				3.98341	-0.448061	0.557374	-0.166425	-0.0120878	-0.0890368
IRES9	-0.771679	-0.902188	-0.860465	-0.865527	-0.856654	-0.826351	-0.83571				0.169124	-0.0462465	0.00588338	-0.0102524	-0.0353732	0.0113261
IRES10	-0.370723	-0.284437	-0.239627	-0.327307	-0.228727	-0.212474	-0.283678				-0.232751	-0.15754	0.365904	-0.301186	-0.0710591	0.335121
IRES11	-0.354573	-0.589536	-0.565133	-0.472125	-0.556803	-0.543577	-0.474658				0.662666	-0.0413941	-0.164576	0.179354	-0.0237519	-0.126789
IRES12	-0.302599	-0.533673	-0.297608	-0.305338	-0.342065	-0.248815	-0.286353				0.763628	-0.442339	0.0259735	0.120283	-0.272608	0.150868
IRES13	-0.344111	-0.399546	-0.302079	-0.154777	-0.206553	-0.224469	-0.169567				0.161097	-0.243945	-0.487627	0.334516	0.0867423	-0.244589
IRES14	-0.620784	-0.801726	-0.809603	-0.550506	-0.61066	-0.666946	-0.556275				0.291473	0.00982459	-0.32003	0.109272	0.0921714	-0.165936
IRES15	-0.313888	-0.107374	-0.200149	-0.228749	-0.219378	-0.118346	-0.205464				-0.657922	0.864033	0.142893	-0.0409634	-0.460539	0.736127
IRES16	-0.470446	-0.495583	-0.459749	-0.355078	-0.397593	-0.355934	-0.539306				0.0534305	-0.0723059	-0.227671	0.119737	-0.10478	0.515186
IRES17	-0.330227	-0.49489	-0.427492	-0.461614	-0.405791	-0.356001	-0.254703				0.498638	-0.136188	0.0798177	-0.12093	-0.122698	-0.284544
IRES18	-0.26154	-0.334253	-0.175417	-0.176655	-0.224348	-0.267257	-0.224803				0.278021	-0.475198	0.00705593	0.269979	0.191265	-0.158851
IRES19	-0.501234	-0.562787	-0.213723	-0.229331	-0.314385	-0.261601	-0.269941				0.122803	-0.620241	0.0730268	0.370879	-0.167897	0.0318826
IRES20	-0.587013	-0.687317	-0.492239	-0.513712	-0.51167	-0.423719	-0.412596				0.170871	-0.283826	0.0436242	-0.00397459	-0.171891	-0.0262513
IRES21	-0.34145	-0.408229	-0.120416	-0.113502	-0.0585412	-0.106242	-0.128853				0.195576	-0.705028	-0.0574169	-0.484229	0.814827	0.212826
IRES22	-0.422493	-0.387506	-0.382601	-0.367291	-0.252554	-0.30031	-0.316012				-0.0828097	-0.0126592	-0.0400144	-0.312389	0.189095	0.0522853
IRES23	-0.355323	-0.429854	-0.231708	-0.292814	-0.330552	-0.296088	-0.240889				0.209753	-0.460961	0.263719	0.128882	-0.104262	-0.186427
IRES24	-0.281399	-0.308779	-0.241894	-0.195882	-0.197506	-0.201689	-0.139065				0.0973014	-0.216613	-0.190216	0.00829405	0.021179	-0.310496
IRES25	-0.60753	-0.379099	-0.330863	-0.315136	-0.271256	-0.37266	-0.496827				-0.375999	-0.127238	-0.0475338	-0.139243	0.373834	0.33319
IRES26	-0.42963	-0.524165	-0.208871	-0.281715	-0.30145	-0.0150037	-0.0901882				0.220037	-0.601516	0.348748	0.0700542	-0.950228	5.01107
IRES27	-0.523292	-0.535906	-0.476949	-0.416511	-0.350601	-0.295414	-0.299666				0.0241064	-0.110014	-0.126718	-0.158244	-0.157405	0.014393
IRES28	-0.76694	-0.739768	-0.746804	-0.758363	-0.733935	-0.685762	-0.655728				-0.0354289	0.00951191	0.0154769	-0.0322113	-0.0656366	-0.0437966
IRES29	-0.485165	-0.638641	-0.454714	-0.358883	-0.390287	-0.396514	-0.369618				0.316337	-0.287998	-0.21075	0.0875061	0.015955	-0.0678318
IRES30	-0.828286	-0.876822	-0.907925	-0.829061	-0.854571	-0.819653	-0.814704				0.0585979	0.035472	-0.0868615	0.0307704	-0.0408603	-0.00603889
IRES31	-0.375698	-0.392596	-0.294772	-0.35766	-0.307573	-0.282526	-0.303748				0.0449785	-0.249174	0.213345	-0.14004	-0.0814359	0.0751178
IRES32	-0.38877	-0.472796	-0.183865	-0.266711	-0.185753	-0.184599	-0.209745				0.216131	-0.611112	0.450585	-0.303543	-0.00621378	0.136217
IRES33	-0.595271	-0.67276	-0.651221	-0.714607	-0.556523	-0.52848	-0.634372				0.130174	-0.0320157	0.0973349	-0.221219	-0.0503889	0.200371
IRES34	-0.446542	-0.621094	-0.350102	-0.348792	-0.43262	-0.399411	-0.362669				0.390898	-0.436314	-0.00374066	0.240338	-0.076764	-0.0919898
IRES35	-0.0301538	-0.0372013	-0.0325493	-0.0331883	-0.0337001	-0.0287258	-0.0286841				0.233719	-0.125051	0.0196313	0.0154227	-0.147605	-0.00145033
ITAS1	0.580796	0.63996	0.644456	0.63665	0.555756	0.553441	0.584925				0.101867	0.00702628	-0.0121137	-0.127061	-0.00416534	0.0568868
ITAS2	0.0908331	0.136539	0.108606	0.073787	0.0992597	0.174932	0.130469				0.503183	-0.204574	-0.320602	0.345219	0.76237	-0.254172
ITAS3	0.481007	0.580188	0.589928	0.553004	0.474186	0.504391	0.536703				0.206195	0.0167881	-0.0625907	-0.142528	0.0636993	0.064062
ITAS4	-0.359177	0.160621	-0.286903	0.00172414	-0.461082	-0.400279	-0.336672				-1.44719	-2.78621	-1.00601	-268.427	-0.131871	-0.158906
ITAS5	0.0810971	0.138785	0.0472812	0.165464	-0.221153	-0.186934	-0.165205				0.711339	-0.659319	2.49958	-2.33656	-0.154728	-0.116242
ITAS6	0.260753	0.315257	0.310877	0.322614	0.273922	0.273855	0.293418				0.209027	-0.013893	0.0377524	-0.150928	-0.000246235	0.0714378
ITAS7	0.451627	0.558484	0.572472	0.570379	0.476309	0.466127	0.499229				0.236603	0.0250471	-0.00365667	-0.164925	-0.0213777	0.0710163
ITAS8	0.284013	0.383588	0.329104	0.253965	0.313934	0.389766	0.385485				0.350601	-0.142038	-0.228315	0.236132	0.241555	-0.0109842
ITAS9	-0.378497	-0.329918	-0.46266	-0.467052	-0.34214	-0.394748	-0.361799				-0.128347	0.402348	0.00949411	-0.267448	0.15376	-0.0834672
ITAS10	0.0214455	0.211281	0.249302	0.231265	0.164733	0.281576	0.280218				8.85201	0.179956	-0.0723519	-0.287688	0.709289	-0.00482033
ITAS11	0.342458	0.421128	0.434581	0.437073	0.371826	0.354584	0.395946				0.229722	0.0319455	0.00573418	-0.149283	-0.0463706	0.116649
ITAS12	0.0708724	0.281489	0.271238	0.227544	0.122771	-0.0126559	0.167221				2.97176	-0.0364142	-0.161091	-0.460451	-1.10308	-14.213
ITAS13	-0.157594	0.173354	0.0107602	0.329623	0.184375	0.0489515	0.215305				-2.1	-0.937929	29.6336	-0.44065	-0.7345	3.39833
ITAS14	0.0923985	0.230647	0.230526	0.191104	-0.46284	-0.607077	0.149896				1.49622	-0.000521732	-0.171009	-3.42192	0.311634	-1.24692
ITAS15	-0.644631	-0.523966	-0.345343	-0.306389	-0.503114	-0.533146	-0.190941				-0.187185	-0.340906	-0.112795	0.642073	0.0596922	-0.641859
ITAS16	0.187628	0.229503	0.243113	0.311146	0.170462	0.192694	0.235039				0.223182	0.0593032	0.279842	-0.452147	0.130419	0.219753
ITAS17	0.224101	0.341558	0.34684	0.356453	0.221387	0.296293	0.256355				0.524124	0.015464	0.0277169	-0.378915	0.338348	-0.134795
ITAS18	0.347583	0.455364	0.478546	0.496636	0.402448	0.382319	0.422312				0.310086	0.0509083	0.0378015	-0.189651	-0.0500169	0.104607
ITAS19	-0.193922	-0.0154558	0.0816677	0.0795746	0.0523917	0.216904	0.241349				-0.920299	-6.28395	-0.0256304	-0.341603	3.14005	0.112701
ITAS20	0.550145	0.634191	0.637308	0.658438	0.55207	0.531836	0.575721				0.15277	0.00491555	0.0331549	-0.161547	-0.03665	0.0825158
ITAS21	0.309639	0.404841	0.419277	0.401839	0.300721	0.266557	0.311096				0.307461	0.0356584	-0.0415918	-0.251637	-0.113608	0.167093
ITAS22	0.354923	0.489749	0.508694	0.453147	0.373643	0.377813	0.412774				0.379874	0.0386825	-0.109195	-0.175449	0.0111614	0.0925349
ITAS23	0.518701	0.571285	0.565442	0.578982	0.476885	0.483686	0.522308				0.101377	-0.010228	0.0239455	-0.176339	0.0142625	0.0798476
ITAS24	0.109343	0.145856	0.135412	0.117273	0.0617805	0.0649735	0.0768973				0.333934	-0.0716018	-0.133956	-0.473191	0.0516826	0.183517
ITAS25	0.149245	0.20787	0.2038	0.137388	0.0711916	0.0751	0.0862961				0.39281	-0.0195815	-0.325869	-0.48182	0.0549004	0.149083
ITAS26	0.496108	0.595671	0.589871	0.592879	0.503265	0.509749	0.550595				0.200688	-0.00973585	0.00509849	-0.15115	0.0128833	0.0801287
ITAS27	0.376225	0.470084	0.486233	0.499864	0.396217	0.360047	0.395729				0.249474	0.0343548	0.0280342	-0.20735	-0.0912894	0.0991046
ITAS28	0.575732	0.650343	0.660835	0.682247	0.554348	0.554974	0.620443				0.129593	0.0161328	0.0324016	-0.187468	0.00112917	0.117968
ITAS29	0.49678	0.609571	0.625301	0.638445	0.547673	0.527735	0.565114				0.227045	0.0258056	0.0210194	-0.142177	-0.0364044	0.0708283
ITAS30	0.687241	0.755582	0.765091	0.779079	0.706859	0.693551	0.722537				0.0994429	0.0125851	0.0182825	-0.0926993	-0.0188275	0.0417945
ITAS31	0.1226	0.231751	0.244119	0.236053	0.166475	0.162501	0.161072				0.890304	0.0533694	-0.0330407	-0.294759	-0.0238715	-0.00878885
ITAS32	0.131159	0.248704	0.260934	0.254926	0.190919	0.182182	0.183778				0.896202	0.0491779	-0.0230285	-0.251078	-0.0457633	0.00875839
ITAS33	0.081856	0.216467	0.221975	0.231201	0.180096	0.176194	0.17053				1.64449	0.025442	0.041562	-0.221041	-0.0216631	-0.0321467
ITAS34	0.377329	0.468625	0.467757	0.461421	0.323747	0.283666	0.333798				0.241952	-0.00185139	-0.013545	-0.29837	-0.123803	0.176727
ITAS35	-0.0285714	-0.0285714	-0.0285714	-0.0285714							-7.28584e-16	-2.7929e-15	3.64292e-16	-1	#DIV/0!	#DIV/0!
JPNS1	0.477111	0.440111	0.491287	0.435808	0.341571	0.324908	0.361148				-0.07755	0.116279	-0.112927	-0.216234	-0.0487832	0.111537
JPNS2	0.353748	0.168653	0.254227	0.144415	0.0217593	-0.0310312	0.0693062				-0.523239	0.507397	-0.431946	-0.849327	-2.42611	-3.23344
JPNS3	0.434068	0.403117	0.459484	0.350295	0.245204	0.202425	0.270279				-0.0713062	0.13983	-0.237634	-0.300008	-0.174461	0.335206
JPNS4	0.075057	-0.00254742	0.0333884	-0.0117127	-0.0826762	-0.0796205	-0.0687123				-1.03394	-14.1068	-1.3508	6.0587	-0.0369603	-0.137002
JPNS5	0.051061	0.0346938	0.0350742	0.0231716	0.00947837	-0.00791241	0.00210571				-0.320542	0.0109643	-0.339354	-0.59095	-1.83479	-1.26613
JPNS6	0.203324	0.0908915	0.142392	0.0410055	-0.0278685	0.00219307	0.0163809				-0.552971	0.566611	-0.712023	-1.67963	-1.07869	6.4694
JPNS7	0.319878	0.246549	0.31152	0.177599	0.0716847	0.00207233	0.0847907				-0.229239	0.26352	-0.429895	-0.596368	-0.971091	39.9157
JPNS8	0.423386	0.255569	0.356722	0.218368	0.129726	0.0201819	0.210883				-0.396369	0.395794	-0.387849	-0.405928	-0.844427	9.44912
JPNS9	0.263236	-0.383825	-0.177996	-0.135883	-0.329274	-0.42508	-0.17736				-2.4581	-0.536257	-0.236598	1.42322	0.290962	-0.58276
JPNS10	-0.213911	-0.300924	-0.232348	-0.319514	-0.414964	-0.441004	-0.402327				0.406772	-0.227884	0.375149	0.298736	0.0627532	-0.0877038
JPNS11	0.314666	0.203833	0.260094	0.170867	0.124895	0.120727	0.151551				-0.352222	0.276012	-0.343057	-0.269052	-0.0333685	0.255317
JPNS12	0.0967436	-0.0840088	0.0479582	-0.16051	-0.325328	-0.396259	-0.270554				-1.86837	-1.57087	-4.34687	1.02684	0.218028	-0.317228
JPNS13	0.138494	-0.30109	-0.162635	-0.111107	-0.440338	-0.443541	-0.149114				-3.17404	-0.459846	-0.316833	2.96319	0.00727518	-0.663811
JPNS14	-0.627035	-0.789772	-0.747305	-0.825551	-0.857352	-0.881281	-0.827744				0.259534	-0.0537707	0.104704	0.0385211	0.0279099	-0.0607492
JPNS15	-0.3909	-0.481049	-0.402276	-0.309562	-0.475247	-0.575895	-0.493687				0.230619	-0.163753	-0.230473	0.535222	0.211781	-0.142749
JPNS16	0.178403	0.0858807	0.13734	0.0588467	0.202187	0.174014	0.218532				-0.518614	0.59919	-0.571524	2.43583	-0.139344	0.255834
JPNS17	0.227838	0.0919972	0.170949	0.0765197	0.0373098	-0.00312535	0.0859188				-0.596217	0.858193	-0.552381	-0.512416	-1.08377	-28.491
JPNS18	0.304113	0.238019	0.30251	0.207257	0.129756	0.126395	0.156839				-0.217334	0.27095	-0.314874	-0.373939	-0.0258999	0.240861
JPNS19	0.230137	0.0974218	0.140213	0.0570618	0.0647127	0.0808027	0.113371				-0.576679	0.439238	-0.593035	0.134081	0.248637	0.403065
JPNS20	0.230513	0.168692	0.250955	0.0792801	-0.0904141	-0.16769	-0.0342029				-0.268191	0.487657	-0.684087	-2.14044	0.854684	-0.796034
JPNS21	0.171207	0.139293	0.209821	0.0707363	-0.0568686	-0.0833396	-0.025167				-0.186406	0.506336	-0.662874	-1.80395	0.465475	-0.698019
JPNS22	0.190605	0.164895	0.241653	0.0613682	0.0660535	0.0289034	0.0980491				-0.134885	0.465497	-0.746048	0.0763478	-0.562424	2.3923
JPNS23	0.174017	0.150254	0.234336	0.112439	0.0643215	0.0618386	0.112651				-0.136555	0.559594	-0.52018	-0.427942	-0.0386011	0.82169
JPNS24	-0.104997	-0.108382	-0.0465549	-0.157063	-0.211708	-0.189316	-0.187093				0.0322432	-0.570458	2.37371	0.347919	-0.10577	-0.0117383
JPNS25	0.00248962	-0.0528329	-0.0296431	-0.0656518	-0.0889108	-0.0943706	-0.0776166				-22.2213	-0.438927	1.21474	0.354278	0.0614075	-0.177534
JPNS26	0.141905	0.0405288	0.107378	-0.0418836	-0.000175102	0.0130673	0.0482384				-0.714395	1.64942	-1.39006	-0.995819	-75.6271	2.69152
JPNS27	0.257736	0.213911	0.296547	0.163439	0.226162	0.165132	0.262693				-0.170038	0.386305	-0.44886	0.38377	-0.269851	0.590807
JPNS28	0.442003	0.391062	0.459764	0.347692	0.245319	0.224559	0.284763				-0.115251	0.175681	-0.243759	-0.294437	-0.0846245	0.268098
JPNS29	0.070996	0.0313196	0.103163	-0.024855	-0.131128	-0.16761	-0.100757				-0.558853	2.29389	-1.24093	4.27572	0.278215	-0.398858
JPNS30	0.483204	0.436379	0.50557	0.409348	0.321167	0.245476	0.352661				-0.0969054	0.158556	-0.190323	-0.215418	-0.235676	0.436643
JPNS31	0.214919	0.117772	0.164357	0.103506	-0.00515263	-0.0289107	0.00323845				-0.452018	0.395553	-0.370233	-1.04978	4.61088	-1.11202
JPNS32	0.036289	-0.00436816	0.0173846	-0.0271472	-0.0371336	-0.0456039	-0.0287533				-1.12037	-4.97985	-2.56156	0.36786	0.228104	-0.369499
JPNS33	0.0504135	-0.0329738	-0.000152928	-0.0657679	-0.0372596	-0.0458182	-0.0288591				-1.65407	-0.995362	429.057	-0.433469	0.229704	-0.370139
JPNS34	0.347152	0.290683	0.35909	0.228519	0.14919	0.0626928	0.176406				-0.162663	0.235331	-0.363615	-0.347144	-0.57978	1.81382
JPNS35	0.126369	-0.0112544	0.0450537	-0.0403118	-0.0353375	-0.0543588	-0.0159514				-1.08906	-5.00319	-1.89475	-0.123395	0.538275	-0.706554
KORS1	0.323751	0.202805	0.217219	0.231357	0.242606	0.219305	0.296881				-0.373578	0.0710742	0.0650828	0.0486236	-0.0960459	0.353736
KORS2	-0.262782	-0.212961	-0.194829	-0.190006	-0.197533	-0.194932	-0.183446				-0.18959	-0.0851423	-0.0247575	0.0396146	-0.0131681	-0.058919
KORS3	0.155376	0.158239	0.183048	0.161235	0.167779	0.189875	0.291675				0.0184237	0.156784	-0.119163	0.0405826	0.1317	0.536143
KORS4	-0.305556	-0.152743	-0.0851139	-0.269353	-0.290849	-0.336871	-0.334765				-0.500116	-0.442763	2.16462	0.0798045	0.158234	-0.00625162
KORS5	-0.177212	-0.0896906	-0.0116947	-0.010676	-0.0212095	-0.0307683	-0.0231756				-0.493879	-0.86961	-0.0871073	0.986651	0.450684	-0.246773
KORS6	-0.0760621	-0.0327588	-0.0279644	-0.0395504	-0.0261521	-0.0240493	0.00829679				-0.569315	-0.146354	0.414311	-0.338764	-0.0804078	-1.34499
KORS7	-0.213164	-0.10391	-0.0756187	-0.0933132	-0.082648	-0.0522388	0.0629606				-0.512537	-0.272264	0.233995	-0.114294	-0.367936	-2.20525
KORS8	-0.309303	-0.487931	-0.396878	-0.269578	-0.370115	-0.328192	-0.234828				0.577517	-0.18661	-0.320753	0.372941	-0.113268	-0.28448
KORS9	-0.480245	-0.680665	-0.56152	-0.510774	-0.633912	-0.654032	-0.574949				0.417328	-0.175041	-0.0903731	0.241081	0.0317406	-0.120917
KORS10	-0.424827	-0.566581	-0.545382	-0.542697	-0.60098	-0.603423	-0.505952				0.333676	-0.0374158	-0.00492398	0.107396	0.00406544	-0.161531
KORS11	-0.440065	-0.31627	-0.28251	-0.273449	-0.330207	-0.332471	-0.243058				-0.28131	-0.106745	-0.032075	0.207564	0.00685754	-0.268935
KORS12	-0.480589	-0.521056	-0.490457	-0.495315	-0.559474	-0.550637	-0.380787				0.0842017	-0.0587249	0.00990468	0.129533	-0.0157961	-0.30846
KORS13	-0.424883	-0.499771	-0.476595	-0.482488	-0.475689	-0.46665	-0.339523				0.176256	-0.046373	0.0123654	-0.0140924	-0.019002	-0.272425
KORS14	-0.778688	-0.847314	-0.831729	-0.823098	-0.85661	-0.864517	-0.797206				0.088131	-0.0183939	-0.0103769	0.0407142	0.00923075	-0.0778601
KORS15	-0.497069	-0.47191	-0.401078	-0.357473	-0.438546	-0.599135	-0.587234				-0.0506133	-0.150097	-0.108719	0.226794	0.366185	-0.019864
KORS16	-0.472875	-0.0980813	-0.0882447	-0.10452	-0.0956222	-0.087517	-0.0517943				-0.792585	-0.10029	0.184437	-0.0851327	-0.0847623	-0.40818
KORS17	-0.283801	-0.272386	-0.23864	-0.223653	-0.283	-0.217615	-0.155682				-0.0402225	-0.123889	-0.0628047	0.265356	-0.231044	-0.284599
KORS18	-0.0793069	-0.0153972	-0.00131814	-0.0342059	-0.0353903	-0.014301	0.0478279				-0.805853	-0.914391	24.9501	0.0346272	-0.595905	-4.34437
KORS19	-0.219323	-0.183231	-0.159455	-0.134701	-0.137362	-0.0374543	-0.0236857				-0.164558	-0.129763	-0.155239	0.019751	-0.727331	-0.367611
KORS20	-0.481918	-0.352926	-0.298378	-0.364317	-0.322347	-0.189506	-0.0442931				-0.267663	-0.154559	0.220992	-0.115203	-0.412106	-0.766271
KORS21	-0.484202	-0.434863	-0.409804	-0.41021	-0.395246	-0.297263	-0.178325				-0.101897	-0.057625	0.000988765	-0.0364788	-0.247903	-0.400111
KORS22	-0.245422	-0.0926631	-0.0604282	-0.103829	-0.0887028	-0.02789	0.110748				-0.622434	-0.347872	0.718223	-0.145684	-0.68558	-4.9709
KORS23	-0.270481	-0.234342	-0.194468	-0.170381	-0.154394	-0.0693971	0.01963				-0.133611	-0.17015	-0.12386	-0.0938313	-0.55052	-1.28287
KORS24	-0.204381	-0.273406	-0.220502	-0.262989	-0.276369	-0.333055	-0.219002				0.337728	-0.1935	0.192684	0.0508735	0.205113	-0.342445
KORS25	-0.100845	-0.17551	-0.151021	-0.187747	-0.170448	-0.129119	-0.0731151				0.74039	-0.139534	0.243186	-0.0921376	-0.242474	-0.433738
KORS26	-0.33035	-0.306117	-0.295258	-0.263254	-0.258982	-0.221638	-0.0929195				-0.0733564	-0.0354707	-0.108395	-0.016226	-0.144196	-0.580761
KORS27	-0.129317	-0.147169	-0.114342	-0.128404	-0.112219	-0.0725525	0.0461068				0.138048	-0.223058	0.122981	-0.126046	-0.353473	-1.6355
KORS28	-0.208085	-0.0759237	-0.00989751	-0.0276612	0.0090792	0.10153	0.168928				-0.635132	-0.869639	1.79477	-1.32823	10.1826	0.663828
KORS29	-0.16993	-0.0262387	-0.0104357	-0.0400124	-0.0324341	0.00307204	0.0959484				-0.845591	-0.602279	2.8342	-0.189399	-1.09472	30.2328
KORS30	-0.356846	-0.187981	-0.138566	-0.147095	-0.146889	-0.082428	0.0919502				-0.473215	-0.262873	0.0615566	-0.00140284	-0.438842	-2.11552
KORS31	-0.0560314	-0.0294397	-0.029392	-0.0290043	-0.0285318	-0.027559	-0.0287805				-0.474585	-0.00162183	-0.013192	-0.016289	-0.034096	0.0443244
KORS32	-0.124034	-0.080322	-0.0647841	-0.095151	-0.0646918	-0.0584505	-0.0307798				-0.352419	-0.193446	0.468741	-0.320115	-0.096477	-0.473404
KORS33	-0.163726	-0.0853865	-0.0791053	-0.0901213	-0.0847831	-0.0783868	-0.0567524				-0.478479	-0.0735629	0.139258	-0.0592334	-0.0754434	-0.275996
KORS34	-0.346022	-0.15346	-0.132701	-0.147085	-0.136195	-0.119185	-0.0471929				-0.556501	-0.135277	0.108399	-0.0740377	-0.124899	-0.604035
KORS35											#DIV/0!	#DIV/0!	#DIV/0!	#DIV/0!	#DIV/0!	#DIV/0!
LTUS1	-0.702173	-0.616737	-0.831881	-0.850773	-0.866254	-0.899285	-0.798807				-0.121673	0.348841	0.0227098	0.0181968	0.0381313	-0.111731
LTUS2	-0.649923	-0.513237	-0.457702	-0.446736	-0.399378	-0.365816	-0.281481				-0.210311	-0.108205	-0.0239595	-0.106009	-0.0840341	-0.230541
LTUS3	-0.518853	-0.381684	-0.558879	-0.445114	-0.392831	-0.425997	-0.389742				-0.26437	0.464246	-0.203559	-0.117461	0.0844301	-0.0851071
LTUS4	-0.31305	-0.404791	-0.367371	-0.703831	-0.525077	-0.299498	-0.298099				0.293055	-0.0924415	0.915859	-0.253974	-0.429611	-0.00467238
LTUS5	-0.143119	-0.215663	-0.0885848	-0.109081	-0.0860502	-0.0425095	-0.0582098				0.506876	-0.589244	0.23137	-0.211133	-0.505992	0.369338
LTUS6	-0.487748	-0.534455	-0.591807	-0.597028	-0.545213	-0.50036	-0.18907				0.095759	0.107309	0.00882205	-0.0867875	-0.0822675	-0.622132
LTUS7	-0.586341	-0.245157	-0.145183	-0.13524	-0.125712	-0.218613	-0.128515				-0.581887	-0.407794	-0.0684862	-0.0704571	0.739007	-0.412133
LTUS8	-0.822376	-0.718811	-0.741976	-0.53691	-0.50195	-0.586908	-0.47833				-0.125934	0.0322272	-0.276378	-0.0651136	0.169256	-0.184999
LTUS9	-0.76584	-0.591128	-0.528588	-0.717761	-0.68225	-0.687192	-0.639634				-0.228131	-0.105798	0.357884	-0.0494754	0.00724338	-0.0692067
LTUS10	-0.473194	-0.322653	-0.432981	-0.433389	-0.39634	-0.396931	-0.305733				-0.31814	0.341942	0.000942319	-0.0854856	0.00148942	-0.229756
LTUS11	-0.598166	-0.460583	-0.299415	-0.270419	-0.26191	-0.172939	-0.10868				-0.230009	-0.349921	-0.0968416	-0.031469	-0.339701	-0.371566
LTUS12	-0.522837	-0.504451	-0.467536	-0.505404	-0.60402	-0.531306	-0.48821				-0.0351665	-0.0731787	0.080994	0.195124	-0.120384	-0.0811134
LTUS13	-0.355429	-0.347182	-0.450407	-0.438604	-0.339907	-0.416612	-0.387758				-0.0232049	0.297324	-0.0262054	-0.225026	0.225667	-0.0692589
LTUS14	-0.249809	-0.37352	-0.428739	-0.378764	-0.471258	-0.353196	-0.255374				0.495224	0.147834	-0.116562	0.244199	-0.250526	-0.276961
LTUS15	-0.302546	-0.321987	-0.433673	-0.394873	-0.321388	-0.349326	-0.133418				0.0642592	0.346863	-0.0894679	-0.186097	0.086927	-0.618069
LTUS16	-0.673209	-0.610094	-0.605904	-0.642532	-0.594384	-0.515647	-0.478613				-0.0937514	-0.00686804	0.0604506	-0.0749344	-0.132469	-0.0718203
LTUS17	-0.504162	-0.364498	-0.278309	-0.211531	-0.0959541	-0.208882	-0.0926674				-0.277023	-0.236459	-0.239941	-0.546383	1.17689	-0.556364
LTUS18	-0.557839	0.0381093	-0.118375	-0.1054	0.122207	-0.193932	0.0606565				-1.06832	-4.1062	-0.109613	-2.15947	-2.58691	-1.31277
LTUS19	-0.555556	-0.56779	-0.407038	-0.465542	-0.281657	-0.296049	-0.114118				0.0220215	-0.28312	0.143733	-0.394992	0.0510973	-0.61453
LTUS20	-0.677891	-0.513495	-0.57177	-0.510091	-0.501557	-0.634098	-0.553567				-0.242511	0.113488	-0.107873	-0.0167311	0.26426	-0.127002
LTUS21	-0.45401	-0.348244	-0.411356	-0.417194	-0.415226	-0.507403	-0.434388				-0.232959	0.181227	0.0141915	-0.00471561	0.221993	-0.1439
LTUS22	-0.235898	-0.177495	-0.145895	-0.135299	-0.125579	-0.220332	-0.115808				-0.247578	-0.178031	-0.0726281	-0.0718389	0.754526	-0.474394
LTUS23	-0.726868	-0.734486	-0.365332	-0.49812	-0.374395	-0.468254	-0.378517				0.0104812	-0.502602	0.36347	-0.248384	0.250697	-0.191641
LTUS24	-0.363043	-0.197067	-0.105153	-0.0965165	-0.100219	-0.113503	-0.101465				-0.457181	-0.466406	-0.0821371	0.0383643	0.13255	-0.106062
LTUS25	-0.22589	-0.142847	-0.122024	-0.0868808	-0.135069	-0.170527	-0.132206				-0.367626	-0.145769	-0.288005	0.554651	0.262516	-0.224724
LTUS26	-0.705408	-0.75085	-0.744012	-0.816105	-0.718818	-0.720245	-0.412984				0.0644185	-0.00910621	0.0968974	-0.11921	0.00198635	-0.426606
LTUS27	-0.538603	-0.51517	-0.284037	-0.390382	-0.277436	-0.326848	-0.253453				-0.0435065	-0.448654	0.374406	-0.289323	0.178103	-0.224554
LTUS28	-0.412019	-0.297743	0.0121378	0.041294	0.0338595	-0.122134	0.113362				-0.277357	-1.04077	2.40209	-0.180037	-4.60708	-1.92817
LTUS29	-0.421942	-0.346334	0.0509175	0.089489	0.123483	-0.0438968	0.109742				-0.17919	-1.14702	0.75753	0.379866	-1.35549	-3.50001
LTUS30	-0.388151	-0.0693721	0.134428	0.175327	0.176896	-0.0931443	0.143975				-0.821276	-2.93778	0.304249	0.00894813	-1.52655	-2.54572
LTUS31	-0.276302	-0.126566	-0.0924096	-0.084401	-0.106048	-0.119654	-0.111064				-0.541929	-0.269869	-0.086664	0.256474	0.128303	-0.071792
LTUS32	-0.166029	-0.122351	-0.068796	-0.0629875	-0.114878	-0.168441	-0.122665				-0.263074	-0.437715	-0.0844307	0.823818	0.46626	-0.271761
LTUS33	-0.274904	-0.215683	-0.0758516	-0.0671836	-0.0652568	-0.162152	-0.0548663				-0.215427	-0.648318	-0.114276	-0.0286789	1.48483	-0.661638
LTUS34	-0.173317	-0.114559	-0.0762527	-0.0612949	-0.11131	-0.212239	-0.121327				-0.339022	-0.334378	-0.196161	0.815976	0.906738	-0.428346
LTUS35	-0.0285714	-0.0285714	-0.0285714	-0.0285714	-0.0285715	-0.0285714	-0.0285714				7.35526e-09	4.24355e-08	-1.05326e-09	1.60487e-06	-1.56845e-06	-9.50877e-08
LUXS1	-0.446163	-0.366194	-0.341993	-0.353012	-0.365279	-0.380074	-0.375626				-0.179237	-0.0660878	0.0322173	0.0347498	0.0405054	-0.0117045
LUXS2	-0.315215	-0.309052	-0.275573	-0.276805	-0.239502	-0.255952	-0.245014				-0.0195516	-0.108328	0.00447132	-0.134764	0.0686858	-0.0427369
LUXS3	-0.50142	-0.505186	-0.492634	-0.501145	-0.539753	-0.553215	-0.538858				0.00750973	-0.0248469	0.0172768	0.0770402	0.0249412	-0.025952
LUXS4	-0.263018	-0.299505	-0.321728	-0.299432	-0.310493	-0.317491	-0.289208				0.138725	0.0741975	-0.0692991	0.0369387	0.0225397	-0.0890843
LUXS5											#DIV/0!	#DIV/0!	#DIV/0!	#DIV/0!	#DIV/0!	#DIV/0!
LUXS6	-0.332233	-0.232018	-0.273358	-0.299839	-0.308582	-0.292344	-0.296883				-0.30164	0.178176	0.0968737	0.0291595	-0.0526209	0.0155239
LUXS7	-0.315864	-0.427786	-0.35551	-0.464198	-0.559323	-0.511682	-0.493619				0.354337	-0.168954	0.305726	0.204923	-0.0851767	-0.035302
LUXS8											#DIV/0!	#DIV/0!	#DIV/0!	#DIV/0!	#DIV/0!	#DIV/0!
LUXS9	-0.561108	-0.459074	-0.411734	-0.478001	-0.524214	-0.502647	-0.477695				-0.181843	-0.103122	0.160946	0.0966806	-0.041142	-0.0496418
LUXS10	-0.397026	-0.587983	-0.588269	-0.624688	-0.599455	-0.575005	-0.567212				0.480968	0.000485733	0.0619097	-0.0403935	-0.0407869	-0.0135533
LUXS11	-0.632593	-0.828179	-0.75065	-0.679019	-0.709197	-0.727877	-0.634433				0.309182	-0.0936143	-0.0954242	0.0444433	0.0263392	-0.128379
LUXS12	-0.7265	-0.788581	-0.767176	-0.766119	-0.775984	-0.760112	-0.742898				0.0854533	-0.0271448	-0.00137765	0.0128775	-0.020454	-0.0226479
LUXS13	-0.328309	-0.393782	-0.464388	-0.453189	-0.455773	-0.454992	-0.437188				0.199425	0.179301	-0.0241155	0.00570242	-0.00171491	-0.0391306
LUXS14	-0.20428	-0.306609	-0.36545	-0.40865	-0.420795	-0.412706	-0.399372				0.500928	0.191909	0.11821	0.0297202	-0.0192234	-0.0323087
LUXS15	-0.207106	-0.225901	-0.31905	-0.183443	-0.279011	-0.27278	-0.349736				0.0907469	0.412349	-0.425034	0.52097	-0.0223328	0.282117
LUXS16	-0.109962	-0.132093	-0.159121	-0.148306	-0.154274	-0.150813	-0.150872				0.201262	0.204618	-0.0679694	0.0402412	-0.0224357	0.000389546
LUXS17	-0.532712	-0.537821	-0.510634	-0.524912	-0.609903	-0.638136	-0.618548				0.00959182	-0.0505514	0.0279615	0.161915	0.0462908	-0.0306952
LUXS18	-0.682551	-0.756286	-0.679924	-0.739152	-0.774658	-0.756671	-0.72798				0.10803	-0.100971	0.0871102	0.0480368	-0.0232196	-0.0379173
LUXS19	-0.513775	-0.509953	-0.572635	-0.61898	-0.6521	-0.636884	-0.612081				-0.00743877	0.122917	0.0809317	0.0535076	-0.0233336	-0.0389442
LUXS20	-0.68193	-0.695332	-0.637671	-0.711441	-0.725428	-0.705873	-0.686861				0.0196526	-0.082926	0.115687	0.0196595	-0.0269558	-0.0269341
LUXS21	-0.633059	-0.692909	-0.617914	-0.68656	-0.69481	-0.677149	-0.653611				0.0945418	-0.108232	0.111093	0.0120169	-0.0254197	-0.0347599
LUXS22	-0.667017	-0.657476	-0.631729	-0.657189	-0.698067	-0.704011	-0.685306				-0.0143049	-0.0391605	0.0403027	0.0622017	0.00851467	-0.0265692
LUXS23	-0.591265	-0.663813	-0.643518	-0.696017	-0.726343	-0.709428	-0.648098				0.122699	-0.0305735	0.0815823	0.0435707	-0.0232877	-0.0864509
LUXS24	-0.324429	-0.395682	-0.515282	-0.573677	-0.614386	-0.614293	-0.578971				0.219625	0.302264	0.113326	0.0709613	-0.00015091	-0.0574999
LUXS25	-0.338473	-0.361958	-0.36256	-0.317702	-0.302396	-0.278538	-0.258107				0.0693866	0.00166195	-0.123725	-0.0481776	-0.078898	-0.0733499
LUXS26	-0.647138	-0.647822	-0.629784	-0.708733	-0.752464	-0.743812	-0.708863				0.00105715	-0.0278441	0.12536	0.0617024	-0.0114978	-0.0469873
LUXS27	-0.797889	-0.792763	-0.726281	-0.7573	-0.790059	-0.76645	-0.739385				-0.00642441	-0.0838623	0.0427097	0.0432581	-0.0298826	-0.0353122
LUXS28	-0.894911	-0.92781	-0.864783	-0.904744	-0.922422	-0.909423	-0.892692				0.0367631	-0.0679311	0.0462092	0.0195396	-0.0140921	-0.0183974
LUXS29	-0.695775	-0.745012	-0.658977	-0.734722	-0.766311	-0.746946	-0.715268				0.0707655	-0.115481	0.114943	0.0429943	-0.0252701	-0.0424106
LUXS30	-0.789155	-0.821999	-0.684366	-0.754111	-0.782524	-0.751065	-0.696577				0.0416184	-0.167437	0.101912	0.037678	-0.0402024	-0.0725477
LUXS31	-0.435543	-0.436991	-0.445973	-0.483061	-0.560764	-0.541038	-0.514702				0.00332642	0.0205538	0.083161	0.160856	-0.0351765	-0.0486764
LUXS32	-0.673496	-0.684368	-0.665324	-0.710266	-0.748229	-0.730119	-0.703555				0.016143	-0.0278266	0.0675491	0.053449	-0.0242044	-0.0363828
LUXS33	-0.237463	-0.302919	-0.318417	-0.361687	-0.387066	-0.36606	-0.35358				0.27565	0.0511625	0.13589	0.0701684	-0.0542705	-0.0340936
LUXS34	-0.61027	-0.68384	-0.64061	-0.694632	-0.730511	-0.714964	-0.695218				0.120554	-0.0632164	0.0843281	0.051652	-0.021282	-0.0276186
LUXS35	-0.0880204	-0.0900717	-0.0898078	-0.09138	-0.0918169	-0.0913671	-0.09078				0.0233051	-0.00293046	0.0175063	0.00478171	-0.00489894	-0.00642525
LVAS1	-0.394613	-0.761316	-0.878394	-0.792664	-0.840754	-0.829271	-0.842492				0.929272	0.153783	-0.0975986	0.0606689	-0.0136579	0.0159425
LVAS2	-0.674104	-0.343398	-0.333683	-0.368057	-0.409786	-0.384674	-0.339498				-0.490586	-0.0282899	0.103014	0.113377	-0.0612814	-0.117441
LVAS3	-0.351872	-0.236033	-0.294671	-0.436664	-0.386404	-0.388519	-0.12173				-0.329206	0.24843	0.481869	-0.115101	0.00547282	-0.686682
LVAS4	-0.367068	-0.218381	-0.211182	-0.197038	-0.217285	-0.176884	-0.267685				-0.405067	-0.0329631	-0.066977	0.102756	-0.185936	0.513339
LVAS5	-0.0321479	-0.0446349	-0.0899438	-0.0981254	-0.0812288	-0.0890169	-0.0598809				0.388425	1.0151	0.0909638	-0.172194	0.0958775	-0.327308
LVAS6	-0.638846	-0.831459	-0.848055	-0.87541	-0.862356	-0.831272	-0.815469				0.301501	0.0199604	0.0322564	-0.0149118	-0.0360463	-0.0190099
LVAS7	-0.199246	-0.357801	-0.305307	-0.385941	-0.383553	-0.441167	-0.371263				0.795774	-0.146712	0.264109	-0.00618862	0.150211	-0.158451
LVAS8	-0.132312	-0.110578	-0.0653707	-0.0428867	-0.0518752	-0.0661027	-0.0472961				-0.164257	-0.408829	-0.343945	0.209585	0.274264	-0.284506
LVAS9	-0.329661	-0.441238	-0.464001	-0.530534	-0.565722	-0.539805	-0.490473				0.338457	0.0515895	0.143391	0.0663244	-0.0458113	-0.0913888
LVAS10	-0.280255	-0.364923	-0.351922	-0.334479	-0.361964	-0.39738	-0.288518				0.302113	-0.0356286	-0.049565	0.0821722	0.0978453	-0.273949
LVAS11	-0.146812	-0.313987	-0.176312	-0.449542	-0.635955	-0.574888	-0.063636				1.1387	-0.438473	1.54969	0.414672	-0.0960235	-0.889307
LVAS12	-0.389335	-0.444827	-0.217561	-0.573517	-0.268449	-0.136226	-0.0757589				0.142531	-0.51091	1.63613	-0.531924	-0.492546	-0.443872
LVAS13	-0.327748	-0.457319	-0.492797	-0.440347	-0.433441	-0.424065	-0.432601				0.395339	0.0775787	-0.106434	-0.0156829	-0.0216322	0.020129
LVAS14	-0.366844	-0.297958	-0.325947	-0.335334	-0.468816	-0.510046	-0.380313				-0.18778	0.0939354	0.0287981	0.398058	0.0879446	-0.254355
LVAS15	-0.218322	-0.604631	-0.65923	-0.443573	-0.318109	-0.348812	-0.317304				1.76945	0.0903009	-0.327135	-0.282848	0.0965184	-0.0903295
LVAS16	-0.246447	-0.257956	-0.302657	-0.447712	-0.452732	-0.456879	-0.37599				0.046698	0.173288	0.479274	0.0112133	0.00915971	-0.177048
LVAS17	-0.188741	-0.505707	-0.473377	-0.515666	-0.590773	-0.530121	-0.464206				1.67937	-0.0639297	0.0893348	0.14565	-0.102665	-0.12434
LVAS18	-0.102738	-0.141302	-0.111334	-0.0933003	-0.183206	-0.0618617	0.0363279				0.375355	-0.212083	-0.161978	0.963621	-0.662339	-1.58724
LVAS19	-0.250825	-0.330703	-0.167523	-0.218862	-0.214655	-0.192487	-0.163287				0.31846	-0.493435	0.306461	-0.019223	-0.10327	-0.151699
LVAS20	-0.319604	-0.60165	-0.597032	-0.653697	-0.674912	-0.615251	-0.535128				0.882489	-0.00767676	0.0949125	0.0324534	-0.0883975	-0.130229
LVAS21	-0.0451033	-0.0935007	-0.333036	-0.194083	-0.276313	-0.244317	-0.0955919				1.07304	2.56186	-0.417233	0.423689	-0.115797	-0.608738
LVAS22	-0.1004	-0.31517	-0.230844	-0.213218	-0.242824	-0.211326	-0.149415				2.13912	-0.267555	-0.0763586	0.138858	-0.129718	-0.292964
LVAS23	-0.253306	-0.497993	-0.255295	-0.401952	-0.475018	-0.383769	-0.296655				0.965974	-0.487353	0.574459	0.181779	-0.192095	-0.226997
LVAS24	-0.347607	-0.294339	-0.194035	-0.150397	-0.170573	-0.183537	-0.0967583				-0.15324	-0.340777	-0.224899	0.134152	0.0760046	-0.472814
LVAS25	-0.117249	-0.271443	-0.226531	-0.169076	-0.167946	-0.194441	-0.173228				1.31511	-0.165459	-0.253629	-0.00668281	0.157758	-0.109097
LVAS26	-0.277748	-0.611028	-0.337417	-0.541047	-0.469725	-0.37649	-0.285081				1.19993	-0.447788	0.603497	-0.131821	-0.19849	-0.242792
LVAS27	-0.123123	-0.31044	-0.232991	-0.209744	-0.245744	-0.209533	-0.142781				1.52139	-0.24948	-0.0997769	0.171638	-0.147356	-0.318576
LVAS28	-0.0471567	-0.259624	-0.368642	-0.262885	-0.393315	-0.354438	-0.215759				4.50557	0.419904	-0.286883	0.496148	-0.0988447	-0.391263
LVAS29	-0.00567279	-0.276118	-0.246251	-0.180964	-0.286379	-0.211578	-0.0843557				47.6741	-0.108166	-0.265123	0.582519	-0.261197	-0.601302
LVAS30	0.267249	-0.317129	-0.0834904	0.00909009	-0.165621	-0.0495671	0.136909				-2.18664	-0.736731	-1.10888	-19.2199	-0.700719	-3.76209
LVAS31	-0.157672	-0.296068	-0.208581	-0.163399	-0.158307	-0.139807	-0.117179				0.877745	-0.295497	-0.216614	-0.0311644	-0.11686	-0.16185
LVAS32	-0.112454	-0.237768	-0.194731	-0.19196	-0.195902	-0.189699	-0.168096				1.11436	-0.181006	-0.0142305	0.0205391	-0.0316642	-0.113882
LVAS33	-0.182999	-0.293121	-0.263458	-0.28801	-0.295819	-0.278097	-0.236243				0.601762	-0.101199	0.0931944	0.0271137	-0.0599101	-0.150502
LVAS34	-0.244835	-0.632655	-0.228816	-0.220946	-0.230135	-0.209027	-0.172767				1.584	-0.638325	-0.0343946	0.0415894	-0.0917199	-0.173469
LVAS35	-0.0285714	-0.0285714	-0.0285714	-0.0285714	-0.0285717	-0.0285715	-0.0285714				8.27062e-08	1.27593e-07	2.13954e-07	8.44016e-06	-6.31632e-06	-2.54814e-06
MEXS1	0.553972	0.105588	0.381767	0.29368	0.457499	0.469422	0.26034				-0.809398	2.61561	-0.230734	0.557815	0.0260619	-0.445404
MEXS2	-0.567123	-0.6894	-0.621062	-0.669509	-0.645119	-0.689515	-0.658884				0.21561	-0.099126	0.0780066	-0.0364306	0.068819	-0.044424
MEXS3	0.319084	-0.150693	0.0934331	-0.036763	0.232676	0.153679	0.0796343				-1.47227	-1.62002	-1.39347	-7.3291	-0.339517	-0.481813
MEXS4	-0.347288	-0.352067	-0.357648	-0.20876	-0.161669	-0.174876	-0.167804				0.013759	0.0158537	-0.416299	-0.225575	0.0816923	-0.0404397
MEXS5	-0.25571	-0.246317	-0.270776	-0.262468	-0.216277	-0.226844	-0.240831				-0.0367338	0.0993012	-0.0306832	-0.175985	0.0488548	0.0616616
MEXS6	-0.291858	-0.249832	-0.263782	-0.306626	-0.388879	-0.303612	-0.331599				-0.143994	0.0558357	0.162424	0.268251	-0.219262	0.0921795
MEXS7	-0.13855	-0.136188	-0.128442	-0.148621	-0.0893463	-0.23169	-0.228222				-0.0170471	-0.0568772	0.157106	-0.398832	1.59316	-0.0149689
MEXS8	-0.210418	-0.242246	-0.273905	-0.426138	-0.31267	-0.37241	-0.43373				0.151257	0.130691	0.555789	-0.266272	0.191067	0.164656
MEXS9	-0.245716	-0.31376	-0.355499	-0.40764	-0.323596	-0.376525	-0.370331				0.276921	0.133028	0.146669	-0.206171	0.163565	-0.0164516
MEXS10	-0.610715	-0.585175	-0.612804	-0.647527	-0.607156	-0.619509	-0.624408				-0.0418188	0.0472147	0.0566628	-0.0623472	0.0203457	0.00790858
MEXS11	-0.242884	-0.333526	-0.383863	-0.458053	-0.193189	-0.334808	-0.487449				0.373191	0.150925	0.19327	-0.578239	0.733063	0.455903
MEXS12	-0.620228	-0.657176	-0.696079	-0.716052	-0.745582	-0.739745	-0.755691				0.0595711	0.0591982	0.0286928	0.0412413	-0.00782942	0.0215556
MEXS13	-0.48298	-0.513228	-0.503962	-0.537803	-0.502088	-0.521666	-0.467665				0.0626288	-0.0180544	0.0671507	-0.0664097	0.0389935	-0.103517
MEXS14	-0.711664	-0.691226	-0.695876	-0.754985	-0.804688	-0.785357	-0.740559				-0.028719	0.00672769	0.0849409	0.0658332	-0.0240226	-0.0570416
MEXS15	-0.804393	-0.765004	-0.78029	-0.837329	-0.790704	-0.811229	-0.828359				-0.0489669	0.0199808	0.0731008	-0.055684	0.0259584	0.0211156
MEXS16	-0.59669	-0.539019	-0.571778	-0.646968	-0.645838	-0.497486	-0.60645				-0.0966506	0.0607747	0.131503	-0.00174671	-0.229705	0.219028
MEXS17	-0.10104	-0.145844	-0.157172	-0.266969	-0.210401	-0.276671	-0.201745				0.443427	0.0776709	0.698577	-0.211891	0.314973	-0.270813
MEXS18	-0.15439	-0.231145	-0.216008	-0.227482	-0.345916	-0.4247	-0.373074				0.497154	-0.0654889	0.0531195	0.52063	0.227755	-0.121559
MEXS19	-0.247704	-0.249129	-0.279223	-0.317567	-0.259609	-0.283228	-0.321164				0.00575212	0.120798	0.137321	-0.182505	0.0909802	0.133941
MEXS20	-0.581652	-0.544327	-0.555073	-0.619159	-0.505422	-0.547335	-0.545917				-0.0641705	0.0197405	0.115456	-0.183696	0.0829262	-0.00258967
MEXS21	-0.583197	-0.546394	-0.553376	-0.617781	-0.495273	-0.536501	-0.529801				-0.063106	0.0127788	0.116387	-0.198304	0.0832429	-0.0124867
MEXS22	0.0171685	0.0123983	-0.00103275	0.0197382	-0.0113242	-0.0237792	-0.0194551				-0.277846	-1.0833	-20.1123	-1.57372	1.09986	-0.181844
MEXS23	-0.570015	-0.568878	-0.596157	-0.640243	-0.565131	-0.601282	-0.622829				-0.00199439	0.0479522	0.0739492	-0.117317	0.0639686	0.035836
MEXS24	-0.110525	-0.125602	-0.142518	-0.16119	-0.130637	-0.138451	-0.144334				0.136415	0.134679	0.131019	-0.189546	0.0598117	0.0424899
MEXS25	-0.194265	-0.206202	-0.27272	-0.219338	-0.122409	-0.167437	-0.173838				0.0614512	0.322582	-0.195739	-0.441916	0.367854	0.0382276
MEXS26	-0.308991	-0.330836	-0.324211	-0.381101	-0.309998	-0.324464	-0.354343				0.0706977	-0.0200253	0.17547	-0.186571	0.0466644	0.0920882
MEXS27	-0.00301635	-0.0278248	-0.0229939	0.00804657	0.046788	0.0192404	-0.0192167				8.22466	-0.173618	-1.34994	4.81465	-0.588774	-1.99876
MEXS28	-0.0816458	-0.0840473	-0.0774785	-0.0743129	-0.0307737	-0.0796878	-0.0863289				0.029414	-0.0781566	-0.0408577	-0.58589	1.58948	0.0833379
MEXS29											#DIV/0!	#DIV/0!	#DIV/0!	#DIV/0!	#DIV/0!	#DIV/0!
MEXS30	-0.147107	-0.121011	-0.100825	-0.147664	0.0265365	-0.148433	-0.140198				-0.177392	-0.166812	0.46456	-1.17971	-6.59354	-0.0554807
MEXS31	-0.0619129	-0.05975	-0.0599238	-0.0616991	-0.0576903	-0.0537534	-0.0547014				-0.0349348	0.00290884	0.0296271	-0.0649739	-0.068243	0.0176369
MEXS32	-0.0949032	-0.0838916	-0.0887817	-0.104331	-0.0877317	-0.096321	-0.110114				-0.116029	0.0582898	0.175139	-0.159101	0.0979041	0.143195
MEXS33	-0.0574898	-0.0582118	-0.0579975	-0.058928	-0.0574024	-0.0570835	-0.0572339				0.0125592	-0.00368139	0.0160429	-0.025889	-0.00555468	0.00263441
MEXS34	-0.0523647	-0.0578418	-0.0615853	-0.0614481	-0.0278327	-0.0335698	-0.0397298				0.104594	0.0647203	-0.00222787	-0.547054	0.206128	0.183498
MEXS35	-0.0571429	-0.0571431	-0.0571436								4.39012e-06	7.6278e-06	-1	#DIV/0!	#DIV/0!	#DIV/0!
MLTS1	-0.287935	-0.44667	-0.471266	-0.298521	-0.412917	-0.456672	-0.475592				0.551286	0.0550664	-0.366556	0.38321	0.105964	0.0414301
MLTS2	-0.324665	-0.30723	-0.312226	-0.369065	-0.385338	-0.462039	-0.346634				-0.0537005	0.0162615	0.182043	0.0440918	0.199051	-0.249773
MLTS3	-0.27437	-0.42937	-0.477407	-0.347015	-0.41485	-0.443543	-0.4698				0.56493	0.111877	-0.273126	0.195482	0.0691654	0.0591985
MLTS4	-0.192905	-0.407607	-0.347385	-0.322285	-0.387266	-0.325471	-0.369543				1.11299	-0.147746	-0.0722534	0.201626	-0.159568	0.13541
MLTS5	-0.0454655	-0.0807725	-0.10339	-0.111583	-0.111758	-0.0886437	-0.0750532				0.776565	0.280016	0.0792389	0.00157191	-0.206825	-0.153316
MLTS6	-0.096494	-0.070828	-0.0931461	-0.0940716	-0.101346	-0.0874357	-0.10445				-0.265985	0.315104	0.00993567	0.0773278	-0.137255	0.194589
MLTS7	-0.678487	-0.544052	-0.519575	-0.578466	-0.609493	-0.588528	-0.605527				-0.198139	-0.0449905	0.113345	0.053636	-0.034397	0.0288838
MLTS8	-0.710188	-0.542197	-0.201715	-0.432717	-0.419412	-0.328279	-0.424527				-0.236544	-0.627967	1.14519	-0.030747	-0.217288	0.29319
MLTS9	-0.151017	-0.287984	-0.191	-0.292317	-0.404399	-0.339585	-0.336217				0.90696	-0.33677	0.530455	0.383426	-0.160272	-0.0099165
MLTS10	-0.286949	-0.393074	-0.3991	-0.471275	-0.31792	-0.320729	-0.495469				0.369838	0.0153308	0.180842	-0.325404	0.00883489	0.544822
MLTS11	-0.402858	-0.387142	-0.460293	-0.544289	-0.550271	-0.449568	-0.451241				-0.0390111	0.188951	0.182482	0.0109906	-0.183006	0.00372104
MLTS12	-0.398958	-0.383904	-0.444282	-0.503189	-0.503582	-0.426354	-0.435042				-0.0377332	0.157274	0.132588	0.000780331	-0.153358	0.0203789
MLTS13	-0.36889	-0.485798	-0.542098	-0.540748	-0.604138	-0.609965	-0.604128				0.316917	0.115892	-0.00249064	0.117226	0.00964598	-0.00956969
MLTS14	-0.664593	-0.673703	-0.641427	-0.512044	-0.61968	-0.621427	-0.516163				0.0137074	-0.047908	-0.201712	0.21021	0.00281852	-0.169391
MLTS15	-0.193152	-0.294037	-0.319592	-0.347761	-0.324975	-0.295703	-0.306842				0.522307	0.086912	0.088138	-0.0655209	-0.0900741	0.0376676
MLTS16	-0.239948	-0.284408	-0.641503	-0.430599	-0.422585	-0.334377	-0.298604				0.185288	1.25557	-0.328765	-0.0186125	-0.208735	-0.106984
MLTS17	-0.355496	-0.506551	-0.570328	-0.697686	-0.724307	-0.632552	-0.577755				0.424913	0.125905	0.223306	0.0381559	-0.12668	-0.0866294
MLTS18	-0.537822	-0.492688	-0.555445	-0.653288	-0.683999	-0.571601	-0.551016				-0.0839186	0.127375	0.176153	0.0470106	-0.164325	-0.0360124
MLTS19	-0.533636	-0.507753	-0.519548	-0.519205	-0.561667	-0.550431	-0.554384				-0.048504	0.0232305	-0.000660561	0.0817825	-0.0200034	0.00718178
MLTS20	-0.268414	-0.432448	-0.473247	-0.5416	-0.598148	-0.585055	-0.534784				0.61112	0.0943457	0.144433	0.104409	-0.0218899	-0.0859241
MLTS21	-0.38633	-0.607683	-0.601073	-0.738994	-0.796838	-0.752951	-0.727497				0.572962	-0.0108761	0.229457	0.078275	-0.0550769	-0.0338059
MLTS22	-0.510764	-0.629822	-0.651433	-0.560292	-0.607004	-0.612456	-0.619797				0.233099	0.0343122	-0.139908	0.083371	0.00898274	0.0119853
MLTS23	-0.529418	-0.439575	-0.499234	-0.584538	-0.609311	-0.568115	-0.515636				-0.169703	0.135722	0.170869	0.0423801	-0.0676116	-0.0923725
MLTS24	-0.537574	-0.584583	-0.612994	-0.69678	-0.709594	-0.660687	-0.667223				0.0874463	0.0485998	0.136684	0.0183904	-0.0689225	0.00989237
MLTS25	-0.353613	-0.324598	-0.323304	-0.314117	-0.236632	-0.282378	-0.275575				-0.0820549	-0.00398397	-0.0284173	-0.246675	0.193319	-0.0240917
MLTS26	-0.771371	-0.718316	-0.740045	-0.723946	-0.62432	-0.682175	-0.527669				-0.0687793	0.0302491	-0.0217537	-0.137615	0.0926689	-0.22649
MLTS27	-0.61825	-0.80266	-0.637962	-0.745221	-0.798107	-0.734956	-0.690454				0.298278	-0.205191	0.168128	0.070966	-0.0791252	-0.0605513
MLTS28	-0.822245	-0.854561	-0.858414	-0.91825	-0.8472	-0.760122	-0.861997				0.0393025	0.00450911	0.0697052	-0.0773758	-0.102784	0.134025
MLTS29	-0.452429	-0.603253	-0.643977	-0.672746	-0.700232	-0.652204	-0.613267				0.333364	0.0675086	0.0446732	0.0408569	-0.0685896	-0.0597001
MLTS30	-0.558411	-0.803499	-0.79522	-0.793266	-0.816867	-0.777052	-0.755891				0.438904	-0.0103037	-0.00245836	0.0297517	-0.0487402	-0.0272332
MLTS31	-0.227746	-0.535822	-0.581115	-0.694277	-0.67938	-0.609429	-0.598124				1.35272	0.0845283	0.194734	-0.0214574	-0.102962	-0.0185502
MLTS32	-0.287603	-0.499329	-0.555058	-0.703205	-0.753762	-0.670477	-0.645338				0.736171	0.111608	0.266905	0.0718948	-0.110492	-0.0374947
MLTS33	-0.300258	-0.441906	-0.453105	-0.513791	-0.520816	-0.479879	-0.444183				0.471752	0.0253437	0.133934	0.0136718	-0.0786005	-0.0743856
MLTS34	-0.350056	-0.752704	-0.755433	-0.863311	-0.900256	-0.873398	-0.853294				1.15024	0.00362474	0.142803	0.0427949	-0.0298338	-0.0230183
MLTS35	-0.0471254	-0.0471414	-0.0487991	-0.0573385	-0.0480804	-0.0539784	-0.0489488				0.000339396	0.0351649	0.174991	-0.161465	0.122671	-0.0931794
NETS1	-0.0710854	-0.215957	-0.0864824	-0.163593	-0.0522457	-0.0180844	0.0741596				2.038	-0.59954	0.891632	-0.680636	-0.653858	-5.10074
NETS2	-0.509065	-0.451678	-0.313661	-0.300862	-0.340346	-0.419988	-0.399641				-0.11273	-0.305564	-0.0408051	0.131234	0.234006	-0.0484484
NETS3	-0.0818612	-0.174253	-0.21998	-0.0473778	-0.101371	-0.141612	-0.0168107				1.12864	0.262416	-0.784627	1.13964	0.396964	-0.88129
NETS4	-0.147863	-0.0845348	-0.0856755	-0.0633359	-0.10128	-0.103295	-0.0653327				-0.428289	0.0134934	-0.260747	0.599097	0.019892	-0.367512
NETS5	-0.0368477	-0.0365711	-0.0430689	-0.0309016	-0.0516337	-0.046023	-0.042281				-0.0075059	0.177676	-0.282509	0.670907	-0.108662	-0.0813085
NETS6	-0.186824	-0.225662	-0.181153	-0.149686	-0.137976	-0.136277	-0.101689				0.207885	-0.19724	-0.173701	-0.0782333	-0.0123158	-0.2538
NETS7	-0.34871	-0.313011	-0.333462	-0.237128	-0.249199	-0.242626	-0.143227				-0.102376	0.0653372	-0.288892	0.0509044	-0.0263744	-0.409681
NETS8	-0.426929	-0.515018	-0.417244	-0.367443	-0.495903	-0.484136	-0.323336				0.206334	-0.189846	-0.119357	0.349604	-0.0237271	-0.332138
NETS9	-0.581571	-0.682733	-0.574125	-0.574854	-0.628894	-0.604334	-0.561715				0.173947	-0.159079	0.00126927	0.0940066	-0.0390519	-0.070522
NETS10	-0.283887	-0.327044	-0.236446	-0.325142	-0.288382	-0.261097	-0.228607				0.152023	-0.277023	0.375124	-0.113057	-0.0946151	-0.124436
NETS11	-0.206999	-0.372091	-0.268902	-0.181624	-0.191238	-0.184578	-0.0981484				0.797548	-0.277321	-0.324571	0.0529338	-0.0348284	-0.468254
NETS12	-0.44114	-0.364004	-0.27935	-0.41166	-0.57909	-0.567584	-0.41172				-0.174857	-0.232562	0.473633	0.406719	-0.0198689	-0.27461
NETS13	-0.45972	-0.357185	-0.451514	-0.213823	-0.130883	-0.15871	-0.0590175				-0.223038	0.264091	-0.526431	-0.38789	0.212608	-0.628143
NETS14	-0.372337	-0.332842	-0.293212	-0.314829	-0.259705	-0.248599	-0.275907				-0.106074	-0.119064	0.0737248	-0.175093	-0.0427621	0.109847
NETS15	-0.372441	-0.382336	-0.375882	-0.408073	-0.339307	-0.349043	-0.309675				0.0265678	-0.0168817	0.0856415	-0.168515	0.0286954	-0.112789
NETS16	-0.1154	-0.12246	-0.1499	-0.0905772	-0.0866942	-0.0802415	-0.0718868				0.0611789	0.224068	-0.395748	-0.0428692	-0.0744306	-0.10412
NETS17	-0.33863	-0.223803	-0.140113	-0.066	-0.212787	-0.210571	-0.00658306				-0.339093	-0.373944	-0.528952	2.22404	-0.010415	-0.968737
NETS18	-0.174373	-0.57192	-0.323224	-0.0903224	-0.125586	-0.0944336	0.104968				2.27986	-0.434844	-0.720558	0.390422	-0.248057	-2.11155
NETS19	-0.371254	-0.368359	-0.426854	-0.259756	-0.301347	-0.277968	-0.112494				-0.00779901	0.158799	-0.391464	0.160116	-0.0775807	-0.595301
NETS20	-0.187767	-0.216818	-0.33241	-0.175149	-0.243798	-0.212404	-0.0642685				0.15472	0.533128	-0.473093	0.391947	-0.128771	-0.697423
NETS21	-0.179987	-0.276923	-0.27964	-0.209921	-0.210911	-0.195243	-0.0984513				0.538571	0.00981056	-0.249315	0.00471654	-0.074288	-0.49575
NETS22	-0.367936	-0.392799	-0.450032	-0.265553	-0.299877	-0.278301	-0.0829408				0.0675752	0.145704	-0.409925	0.129258	-0.0719494	-0.701975
NETS23	-0.229267	-0.148441	-0.116535	-0.0910981	-0.182696	-0.189345	-0.09654				-0.35254	-0.214939	-0.218278	1.00548	0.0363972	-0.490138
NETS24	-0.371547	-0.4279	-0.496659	-0.294335	-0.373774	-0.438901	-0.247111				0.151671	0.16069	-0.40737	0.26989	0.174243	-0.436978
NETS25	-0.272825	-0.26724	-0.288309	-0.165975	-0.174679	-0.196335	-0.138827				-0.0204683	0.0788379	-0.424315	0.0524423	0.123975	-0.29291
NETS26	-0.145205	-0.185082	-0.167225	-0.129158	-0.414845	-0.100761	-0.0233259				0.274622	-0.0964814	-0.227636	2.21191	-0.757113	-0.768502
NETS27	-0.36868	-0.357046	-0.391513	-0.260116	-0.280468	-0.259888	-0.143035				-0.0315572	0.0965343	-0.335613	0.0782426	-0.0733785	-0.44963
NETS28	0.085218	-0.0546206	-0.206649	0.0713898	-0.0595299	-0.0562873	0.173859				-1.64095	2.78336	-1.34546	-1.83387	-0.0544696	-4.08877
NETS29	-0.302001	-0.268794	-0.402406	-0.134423	-0.212397	-0.169548	0.0824807				-0.109956	0.49708	-0.665951	0.580056	-0.20174	-1.48648
NETS30	-0.489609	-0.503798	-0.593245	-0.257126	-0.343012	-0.298421	0.0468423				0.0289809	0.177546	-0.566578	0.334024	-0.129997	-1.15697
NETS31	-0.482086	-0.617013	-0.375048	-0.425671	-0.239606	-0.234838	-0.142472				0.279881	-0.392156	0.134979	-0.437111	-0.0198962	-0.393318
NETS32	-0.313145	-0.344929	-0.376965	-0.253655	-0.271007	-0.259429	-0.14094				0.101501	0.0928751	-0.327111	0.0684046	-0.0427206	-0.45673
NETS33	-0.286281	-0.253614	-0.268458	-0.194997	-0.210871	-0.200844	-0.134712				-0.114111	0.0585294	-0.273638	0.0814061	-0.0475538	-0.32927
NETS34	-0.366567	-0.394549	-0.471882	-0.228669	-0.294635	-0.25753	0.00101325				0.0763361	0.196004	-0.515411	0.288478	-0.125934	-1.00393
NETS35											#DIV/0!	#DIV/0!	#DIV/0!	#DIV/0!	#DIV/0!	#DIV/0!
NORS1	-0.065308	0.551712	0.572678	0.571384	0.507633	0.524504	0.432182				-9.44785	0.0380005	-0.00225928	-0.111573	0.0332355	-0.176019
NORS2	-0.82949	-0.906195	-0.855524	-0.830189	-0.881914	-0.906133	-0.870401				0.0924719	-0.0559165	-0.0296129	0.0623048	0.0274618	-0.0394335
NORS3	-0.258053	0.30833	0.335856	0.374949	0.354832	0.308132	0.276859				-2.19483	0.0892749	0.116398	-0.0536521	-0.13161	-0.101492
NORS4	-0.114189	-0.117999	-0.101428	-0.0742372	-0.0685533	-0.0700353	-0.0747122				0.0333655	-0.140432	-0.268079	-0.0765641	0.0216186	0.0667788
NORS5	-0.0685302	-0.0684033	-0.0444312	-0.0579352	-0.0365879	-0.0460703	-0.0375648				-0.00185212	-0.350452	0.303931	-0.368469	0.259166	-0.18462
NORS6	0.0893427	-0.0254338	0.0451645	0.0226882	0.00181936	-0.0236229	-0.0504935				-1.28468	-2.77577	-0.497655	-0.91981	-13.9842	1.13748
NORS7	-0.225987	-0.32282	-0.231945	-0.231675	-0.280448	-0.307584	-0.301278				0.428487	-0.281503	-0.00116566	0.210522	0.0967598	-0.0205019
NORS8	-0.489058	-0.498934	-0.337295	-0.455407	-0.385219	-0.37279	-0.3752				0.0201933	-0.323968	0.350172	-0.154121	-0.0322638	0.00646356
NORS9	-0.342362	-0.560618	-0.500127	-0.51993	-0.579369	-0.51115	-0.482198				0.637499	-0.1079	0.0395967	0.114321	-0.117747	-0.0566403
NORS10	-0.099011	-0.129417	-0.109789	-0.117641	-0.108734	-0.116758	-0.11819				0.307096	-0.15166	0.0715145	-0.0757131	0.0737974	0.0122619
NORS11	0.0308703	-0.0691829	-0.00150508	-0.0422109	-0.065171	-0.0760019	-0.0975492				-3.24108	-0.978245	27.0456	0.543938	0.166191	0.283511
NORS12	-0.523692	-0.401489	-0.168138	-0.130964	-0.205375	-0.307601	-0.113806				-0.233349	-0.581212	-0.221096	0.568186	0.497751	-0.630022
NORS13	-0.579637	-0.623312	-0.584796	-0.587634	-0.618952	-0.629125	-0.618144				0.075349	-0.061793	0.00485229	0.053295	0.0164364	-0.0174537
NORS14	-0.0944538	-0.136652	-0.106234	-0.121439	-0.477424	-0.277129	-0.111018				0.446761	-0.222598	0.143136	2.93138	-0.419534	-0.599399
NORS15	-0.291356	-0.294247	-0.304823	-0.288751	-0.292955	-0.291657	-0.31384				0.0099244	0.0359424	-0.0527262	0.0145606	-0.00443206	0.0760601
NORS16	-0.17543	-0.206275	-0.174004	-0.19716	-0.164988	-0.161477	-0.165215				0.175826	-0.156447	0.133078	-0.163175	-0.0212813	0.0231468
NORS17	-0.168874	-0.0984018	-0.0602579	-0.105077	-0.224753	-0.265864	-0.205221				-0.417307	-0.387634	0.743783	1.13894	0.18292	-0.228099
NORS18	0.187907	0.114922	0.208474	0.207524	0.124727	0.0978091	0.106224				-0.388411	0.814054	-0.00456053	-0.398975	-0.215814	0.0860376
NORS19	-0.0580894	-0.160761	-0.107204	-0.122452	-0.160889	-0.175277	-0.177433				1.76748	-0.333146	0.142228	0.3139	0.0894279	0.0122975
NORS20	-0.032395	-0.145418	-0.0422454	-0.0538629	-0.111049	-0.144256	-0.138115				3.4889	-0.70949	0.275003	1.0617	0.299029	-0.0425687
NORS21	-0.0836034	-0.219794	-0.133101	-0.140101	-0.184411	-0.209973	-0.206314				1.629	-0.394428	0.0525936	0.316271	0.138617	-0.0174271
NORS22	-0.189159	-0.227743	-0.198911	-0.197528	-0.207365	-0.232045	-0.241822				0.203975	-0.126597	-0.00695399	0.0498015	0.119014	0.0421361
NORS23	-0.0563154	-0.174063	-0.125964	-0.158884	-0.139331	-0.151457	-0.160801				2.09085	-0.276331	0.261343	-0.123061	0.0870317	0.06169
NORS24	-0.818163	-0.78825	-0.502888	-0.634783	-0.470273	-0.47929	-0.474342				-0.0365613	-0.36202	0.262276	-0.259159	0.019173	-0.0103221
NORS25	-0.220682	-0.310772	-0.238483	-0.19323	-0.237698	-0.24634	-0.254271				0.408233	-0.23261	-0.189752	0.23013	0.0363545	0.0321946
NORS26	-0.57465	-0.566209	-0.0665496	-0.299893	-0.119835	-0.246498	-0.134582				-0.0146883	-0.882465	3.50631	-0.600407	1.05697	-0.454023
NORS27	-0.228212	-0.296265	-0.23493	-0.244399	-0.263797	-0.274148	-0.279174				0.298199	-0.207029	0.0403067	0.0793724	0.0392387	0.01833
NORS28	-0.204335	-0.183304	-0.0606165	-0.0363043	-0.143446	-0.160426	-0.136164				-0.102923	-0.669311	-0.401083	2.95122	0.118371	-0.151239
NORS29	-0.0636085	-0.184495	-0.0661385	-0.0712387	-0.123348	-0.175096	-0.168369				1.90047	-0.641515	0.0771137	0.731478	0.419526	-0.0384167
NORS30	-0.254399	-0.398244	-0.228851	-0.218516	-0.319637	-0.388121	-0.345929				0.565431	-0.42535	-0.045162	0.462765	0.214255	-0.108708
NORS31	-0.35279	-0.374108	-0.343006	-0.382581	-0.408219	-0.407717	-0.389225				0.0604278	-0.0831358	0.115376	0.0670142	-0.00123006	-0.0453555
NORS32	-0.129877	-0.137418	-0.12475	-0.179552	-0.157794	-0.159352	-0.161812				0.0580628	-0.092187	0.439296	-0.121181	0.0098757	0.0154365
NORS33	-0.0994586	-0.113293	-0.101307	-0.108714	-0.10089	-0.547962	-0.14409				0.139097	-0.105794	0.0731083	-0.0719649	4.43128	-0.737043
NORS34	-0.223138	-0.303578	-0.234787	-0.239832	-0.258838	-0.271683	-0.276611				0.360498	-0.226601	0.0214858	0.0792496	0.0496236	0.0181417
NORS35	-0.0285714	-0.0285714	-0.0285715	-0.0285715							-6.59019e-09	7.04881e-07	2.41242e-07	-1	#DIV/0!	#DIV/0!
POLS1	0.450218	0.306803	0.34716	0.426445	0.445636	0.405569	0.201056				-0.318545	0.13154	0.22838	0.0450018	-0.0899091	-0.504263
POLS2	0.24394	-0.125781	0.130036	-0.139151	-0.236507	-0.127626	0.0358174				-1.51562	-2.03383	-2.07009	0.69965	-0.460371	-1.28064
POLS3	0.281847	0.126641	0.117516	0.291001	0.274227	0.287661	0.179437				-0.550676	-0.0720494	1.47626	-0.0576419	0.0489895	-0.376221
POLS4	-0.181091	-0.131655	-0.200083	-0.10679	-0.16594	-0.0886251	0.0016753				-0.272986	0.519749	-0.46627	0.553886	-0.465921	-1.0189
POLS5	-0.175354	-0.10427	-0.0796077	-0.0176799	-0.0143254	-0.0584068	-0.00597883				-0.405375	-0.236523	-0.777913	-0.189733	3.07715	-0.897635
POLS6	0.238259	-0.190801	0.209034	0.226217	0.221264	0.226958	0.272105				-1.80081	-2.09556	0.0822022	-0.0218954	0.0257359	0.198919
POLS7	0.0435629	-0.144183	-0.369972	0.109626	0.105121	0.0886362	0.153526				-4.30977	1.56599	-1.29631	-0.0410935	-0.156821	0.732088
POLS8	0.357945	0.148399	0.347575	0.264056	0.225977	0.215304	0.305141				-0.585414	1.34217	-0.240291	-0.144208	-0.0472292	0.417255
POLS9	-0.316278	-0.144804	-0.398892	-0.0650311	0.115608	0.000212827	0.16238				-0.542161	1.7547	-0.836971	-2.77773	-0.998159	761.968
POLS10	0.126075	-0.253511	0.235309	0.217506	0.276447	0.264134	0.37079				-3.0108	-1.9282	-0.0756606	0.270989	-0.0445402	0.403792
POLS11	0.362974	-0.25044	0.367024	0.390398	0.345899	0.334951	0.383052				-1.68996	-2.46552	0.0636861	-0.113985	-0.0316491	0.143606
POLS12	-0.45683	-0.426841	-0.515293	-0.49596	-0.548152	-0.458445	-0.258412				-0.0656458	0.207224	-0.0375179	0.105234	-0.163654	-0.436329
POLS13	-0.354223	-0.276448	-0.471137	-0.351611	-0.0811985	-0.0284514	-0.00181436				-0.219567	0.704253	-0.253696	-0.769067	-0.649607	-0.936229
POLS14	-0.537765	-0.546784	-0.559245	-0.684042	-0.750565	-0.763841	-0.655176				0.0167711	0.0227902	0.223152	0.0972497	0.0176883	-0.142261
POLS15	-0.770422	-0.696415	-0.663143	-0.722071	-0.736784	-0.753553	-0.637906				-0.0960605	-0.0477761	0.0888617	0.020376	0.0227591	-0.153469
POLS16	0.0729025	-0.0277408	0.138251	0.117953	0.104884	0.0745835	0.0871394				-1.38052	-5.98367	-0.146818	-0.110801	-0.288894	0.168347
POLS17	0.0977117	0.0980438	0.0623666	0.123024	-0.00191951	0.0130773	0.184143				0.00339939	-0.36389	0.9726	-1.0156	-7.81282	13.0811
POLS18	0.395059	-0.325966	0.476986	0.455628	0.411237	0.417554	0.451866				-1.82511	-2.4633	-0.0447781	-0.0974286	0.0153618	0.082174
POLS19	-0.510637	-0.398018	-0.320935	-0.346046	-0.381634	-0.383917	-0.294725				-0.220547	-0.193667	0.078242	0.102843	0.00598324	-0.23232
POLS20	0.179847	-0.0536702	0.343178	0.290639	0.257246	0.145042	0.338389				-1.29842	-7.3942	-0.153097	-0.114895	-0.436172	1.33304
POLS21	0.303177	-0.163499	0.361473	0.348774	0.298539	0.194158	0.304146				-1.53928	-3.21086	-0.0351311	-0.144033	-0.34964	0.566489
POLS22	0.122561	-0.00105926	0.198167	0.142918	0.100239	0.128089	0.217244				-1.00864	-188.08	-0.278799	-0.298631	0.277847	0.696035
POLS23	0.286201	0.136289	0.395563	0.355733	0.272028	0.249468	0.345654				-0.523801	1.90239	-0.100693	-0.235302	-0.0829333	0.385567
POLS24	0.000690663	-0.0447449	0.0343727	-0.00483646	0.0151749	0.00439924	0.0302275				-65.7855	-1.76819	-1.14071	-4.13761	-0.710098	5.87106
POLS25	-0.113503	-0.170151	-0.155731	-0.0107166	-0.00577425	-0.0107748	0.014442				0.49909	-0.0847499	-0.931185	-0.461187	0.866015	-2.34035
POLS26	0.192009	0.0681116	0.349762	0.279535	0.286665	0.239576	0.334969				-0.64527	4.13513	-0.200785	0.0255072	-0.164264	0.398173
POLS27	0.176513	-0.0089193	0.16018	0.156582	0.0738337	0.073282	0.131823				-1.05053	-18.9588	-0.0224627	-0.528465	-0.00747223	0.798845
POLS28	0.16347	0.0164625	0.211372	0.188973	0.114651	0.133586	0.214966				-0.899293	11.8396	-0.10597	-0.393295	0.165152	0.609195
POLS29	0.153834	0.0273447	0.230439	0.196129	0.184454	0.115994	0.211899				-0.822245	7.42718	-0.14889	-0.0595262	-0.371151	0.826814
POLS30	0.320992	0.159275	0.445344	0.434467	0.335849	0.329052	0.429314				-0.503803	1.79607	-0.0244239	-0.226986	-0.020237	0.304697
POLS31	0.041754	-0.0423353	0.0799371	0.0587872	0.0244952	0.0235143	0.0634488				-2.01392	-2.88819	-0.264581	-0.583324	-0.0400456	1.6983
POLS32	0.0483485	-0.0411579	0.0874058	0.0623866	0.0277524	0.0191972	0.0593117				-1.85127	-3.12367	-0.286242	-0.555155	-0.308269	2.0896
POLS33	0.00549359	-0.045593	0.0410745	0.0229157	0.012673	-0.000739331	0.0274248				-9.29931	-1.90089	-0.442096	-0.44697	-1.05834	-38.0941
POLS34	0.134439	-0.000597714	0.207563	0.183336	0.125135	0.0956971	0.162565				-1.00445	-348.262	-0.116723	-0.317453	-0.235252	0.698743
POLS35	-0.0291835	-0.0305268	-0.0292692	-0.0291931	-0.0286315	-0.0285906	-0.028588				0.046032	-0.041197	-0.00260166	-0.0192361	-0.00142987	-9.11198e-05
PORS1	0.553947	0.527496	0.615585	0.640281	0.301593	0.00556291	0.198449				-0.0477499	0.166994	0.0401179	-0.528968	-0.981555	34.6735
PORS2	0.0703525	-0.280009	0.0585674	0.183952	-0.129926	-0.109243	-0.230425				-4.98008	-1.20916	2.14086	-1.7063	-0.159192	1.1093
PORS3	0.531306	0.53134	0.588265	0.600616	0.31739	0.161909	0.294362				6.45484e-05	0.107134	0.0209964	-0.471559	-0.489875	0.818077
PORS4	-0.373075	-0.312529	-0.297021	-0.287604	-0.377721	-0.345029	-0.348665				-0.16229	-0.0496193	-0.0317065	0.313337	-0.0865494	0.010537
PORS5	-0.190241	-0.165988	-0.145795	-0.129793	-0.152139	-0.129127	-0.137705				-0.127486	-0.121655	-0.109757	0.172168	-0.151254	0.0664311
PORS6	-0.255646	0.0893403	-0.11194	0.309759	0.305774	0.174218	0.16046				-1.34947	-2.25296	-3.76719	-0.0128635	-0.430239	-0.0789729
PORS7	0.0365656	-0.195449	0.220479	0.302486	0.321921	0.0587123	-0.0511411				-6.34516	-2.12807	0.371948	0.0642511	-0.817619	-1.87105
PORS8	0.0624669	-0.178392	-0.0444646	0.164908	-0.444387	-0.469711	-0.416094				-3.85578	-0.750748	-4.70875	-3.69475	0.0569867	-0.114149
PORS9	-0.337417	-0.275746	-0.379491	-0.322262	-0.415534	-0.402539	-0.452724				-0.182775	0.376235	-0.150803	0.289429	-0.0312736	0.124671
PORS10	-0.303245	-0.387394	-0.423172	-0.324343	-0.261353	-0.358531	-0.398763				0.277494	0.092355	-0.233542	-0.194211	0.371831	0.112213
PORS11	-0.428083	-0.619507	-0.127484	0.0797017	0.0648833	-0.0990367	-0.255238				0.447165	-0.794217	-1.62519	-0.185923	-2.52638	1.57721
PORS12	-0.458173	-0.631185	-0.286767	-0.468211	-0.53408	-0.592993	-0.57533				0.377613	-0.545669	0.632725	0.140681	0.110308	-0.0297863
PORS13	-0.370895	-0.410026	-0.41758	-0.462769	-0.408792	-0.376221	-0.317644				0.105504	0.0184213	0.108219	-0.11664	-0.0796774	-0.155697
PORS14	-0.357855	-0.579012	-0.574778	-0.720835	-0.799556	-0.675524	-0.421986				0.618009	-0.00731197	0.254109	0.109208	-0.155126	-0.37532
PORS15	-0.677343	-0.666318	-0.667118	-0.642618	-0.663823	-0.656298	-0.722256				-0.016277	0.00120026	-0.0367243	0.0329975	-0.0113359	0.1005
PORS16	0.0233473	-0.270397	-0.327977	-0.314494	-0.193089	0.0485967	-0.226448				-12.5815	0.212945	-0.0411096	-0.386034	-1.25168	-5.65974
PORS17	0.332388	0.249601	0.410367	0.267327	0.189317	0.166855	0.251116				-0.249068	0.644093	-0.348566	-0.291814	-0.118646	0.504997
PORS18	-0.453325	0.0405572	-0.263065	0.335965	0.319008	0.312001	0.274693				-1.08947	-7.48626	-2.27712	-0.0504729	-0.0219669	-0.119574
PORS19	-0.00291839	0.045418	0.163441	0.176009	0.191758	0.190303	0.163343				-16.5627	2.59859	0.0768977	0.0894763	-0.00758498	-0.141668
PORS20	-0.0258191	-0.366177	0.41455	0.504515	0.481644	0.448426	0.369526				13.1824	-2.1321	0.21702	-0.0453333	-0.0689678	-0.175949
PORS21	0.16152	0.118318	0.355151	0.369808	0.374339	0.389888	0.357862				-0.267468	2.00166	0.0412682	0.012252	0.0415396	-0.0821416
PORS22	0.0835938	0.0865658	0.19241	0.159232	0.175187	0.177079	0.155183				0.0355534	1.2227	-0.172432	0.100202	0.0107983	-0.123653
PORS23	-0.0536098	-0.239887	0.277956	0.352208	0.355674	0.325578	0.253154				3.47469	-2.15869	0.267137	0.00984222	-0.084618	-0.222446
PORS24	-0.202716	-0.156355	-0.107324	-0.130743	-0.164837	-0.171336	-0.0624707				-0.228699	-0.313589	0.218204	0.260771	0.0394303	-0.635391
PORS25	-0.395539	-0.496695	0.138316	-0.222198	-0.213885	0.0768385	-0.0132598				0.255741	-1.27847	-2.60645	-0.0374139	-1.35925	-1.17257
PORS26	0.0841056	0.00065587	0.375068	0.358592	0.367204	0.36742	0.312126				-0.992202	570.863	-0.0439267	0.0240156	0.000586558	-0.150493
PORS27	0.166112	0.0774114	0.329214	0.387691	0.388873	0.372753	0.318721				-0.533982	3.25278	0.177627	0.00304942	-0.041454	-0.144953
PORS28	0.320526	0.287546	0.502723	0.546994	0.53915	0.526349	0.485801				-0.102892	0.74832	0.0880614	-0.0143396	-0.0237424	-0.077036
PORS29	0.0985475	0.0688275	0.407471	0.4427	0.443392	0.43749	0.411127				-0.30158	4.92017	0.0864585	0.00156328	-0.0133101	-0.0602605
PORS30	0.37522	0.2441	0.549018	0.610934	0.593547	0.581709	0.534804				-0.349448	1.24915	0.112776	-0.0284591	-0.0199442	-0.0806333
PORS31	0.0783126	0.0542018	0.177483	0.184568	0.201223	0.197116	0.163853				-0.307878	2.27448	0.0399228	0.0902382	-0.020412	-0.168748
PORS32	-0.00421161	-0.00123503	0.0920598	0.100859	0.109822	0.108592	0.0850925				-0.706756	-75.5407	0.095584	0.088861	-0.0111995	-0.2164
PORS33	0.0275651	0.0491463	0.181033	0.19576	0.224414	0.219463	0.183408				0.78292	2.68356	0.081348	0.146374	-0.0220618	-0.164288
PORS34	0.214291	-0.0558175	0.403367	0.277348	0.184616	0.0949112	0.189842				-1.26048	-8.22654	-0.312418	-0.334353	-0.485899	1.00021
PORS35	-0.0286713	-0.0291187	-0.029492	-0.0286814	-0.0290866	-0.0286046	-0.0286973				0.0156066	0.0128187	-0.0274844	0.0141272	-0.0165705	0.00324013
ROMS1	0.494248	0.26792	0.0953775	-0.0385734	-0.118937	-0.146201	-0.373596				-0.457923	-0.644007	-1.40443	2.0834	0.229226	1.55537
ROMS2	0.122221	-0.106662	-0.0783142	0.0153512	-0.0838991	-0.0875373	-0.0331263				-1.87269	-0.265771	-1.19602	-6.46533	0.043364	-0.621575
ROMS3	0.048992	-0.000702809	0.0463873	-0.0201648	-0.0119338	-0.0518088	-0.0381306				-1.01435	-67.0028	-1.4347	-0.408184	3.34134	-0.264012
ROMS4	-0.163596	-0.209614	-0.238442	-0.205595	-0.242296	-0.269828	-0.300848				0.281296	0.137528	-0.137759	0.178512	0.11363	0.114963
ROMS5	-0.0686242	-0.253749	-0.273004	-0.314291	-0.311057	-0.321518	-0.302318				2.69767	0.0758804	0.151232	-0.0102892	0.0336285	-0.0597159
ROMS6	0.145248	-0.0472778	-0.00203069	0.0788289	0.0723453	0.0363144	0.0557644				-1.3255	-0.957048	-39.8187	-0.0822487	-0.498041	0.535601
ROMS7	0.0641459	-0.124114	-0.104349	-0.0740448	-0.0969423	-0.117502	-0.100911				-2.93487	-0.159243	-0.290415	0.309238	0.212078	-0.141194
ROMS8	0.0396281	-0.351023	-0.0594496	-0.0582018	-0.066273	-0.0817451	-0.0559968				-9.85794	-0.830639	-0.0209889	0.138677	0.23346	-0.314983
ROMS9	-0.124965	-0.196377	-0.190783	-0.0708472	-0.0473614	-0.052632	-0.0358741				0.571451	-0.0284828	-0.628651	-0.331499	0.111286	-0.318397
ROMS10	-0.392503	-0.543389	-0.557533	-0.466906	-0.495865	-0.497259	-0.457043				0.384419	0.0260291	-0.16255	0.0620232	0.00281279	-0.0808757
ROMS11	0.232416	0.0521108	0.13249	0.254605	0.211491	0.186735	0.222027				-0.775786	1.54246	0.921691	-0.169336	-0.117054	0.188995
ROMS12	-0.311653	-0.474324	-0.424969	-0.250836	-0.367247	-0.349442	-0.250103				0.52196	-0.104054	-0.409754	0.464091	-0.0484824	-0.284277
ROMS13	-0.156957	-0.418659	-0.13245	0.0717559	-0.237961	-0.0951389	-0.321643				1.66735	-0.683632	-1.54176	-4.31626	-0.600191	2.38078
ROMS14	-0.553772	-0.664868	-0.685314	-0.76389	-0.752048	-0.783648	-0.668908				0.200616	0.0307516	0.114658	-0.0155023	0.042019	-0.146419
ROMS15	-0.705586	-0.814884	-0.817941	-0.807581	-0.836347	-0.860389	-0.823425				0.154905	0.00375063	-0.0126652	0.0356199	0.0287459	-0.0429616
ROMS16	-0.252331	-0.328183	-0.361381	-0.336954	-0.27739	-0.28276	-0.261173				0.300607	0.101159	-0.0675945	-0.176773	0.0193615	-0.0763452
ROMS17	-0.0241784	-0.233228	-0.217615	-0.0681794	-0.18134	-0.184986	-0.0976589				8.64611	-0.0669424	-0.686697	1.65974	0.0201055	-0.472073
ROMS18	0.241886	-0.0106444	0.0792818	0.256661	0.189971	0.181615	0.220691				-1.04401	-8.4482	2.23732	-0.259837	-0.0439859	0.215158
ROMS19	0.0224883	-0.110686	-0.0764518	0.00216748	-0.0380968	-0.0603639	-0.0333616				-5.92194	-0.309292	-1.02835	-18.5765	0.584489	-0.447324
ROMS20	0.161047	-0.138599	-0.0986716	0.0806942	-0.0142812	-0.01604	0.0641598				-1.86061	-0.288076	-1.81781	-1.17698	0.123154	-4.99999
ROMS21	0.144459	-0.117503	-0.0860489	0.0937917	-0.0130381	-0.0249701	0.0677858				-1.8134	-0.267685	-2.08998	-1.13901	0.915172	-3.71468
ROMS22	0.11068	-0.0220283	0.00776184	0.0555614	0.0397732	0.00248296	0.0140118				-1.19903	-1.35236	6.15828	-0.284158	-0.937572	4.6432
ROMS23	0.046449	-0.562114	-0.0941792	-0.0263587	-0.0884874	-0.10557	-0.0533053				-13.1017	-0.832455	-0.720121	2.35704	0.193052	-0.495072
ROMS24	0.0903782	-0.171808	-0.0480098	-0.0146036	-0.0142933	-0.0431985	-0.0362544				-2.90099	-0.720562	-0.695819	-0.0212495	2.02228	-0.160749
ROMS25	-0.11295	-0.0489216	-0.0484632	-0.0391644	-0.0350532	-0.0337015	-0.033026				-0.566874	-0.00936957	-0.191875	-0.104971	-0.038563	-0.0200421
ROMS26	0.00164283	-0.133996	-0.106835	-0.0486141	-0.0805317	-0.0905723	-0.0624996				-82.5637	-0.202702	-0.544959	0.656551	0.124679	-0.309947
ROMS27	-0.0049942	-0.133698	-0.118319	-0.0658077	-0.0975916	-0.109484	-0.080782				25.7708	-0.115031	-0.443811	0.482982	0.121862	-0.262159
ROMS28	0.139169	0.0044477	0.0103199	0.0935242	0.0335019	-0.0369921	-0.014407				-0.968041	1.32028	8.0625	-0.641783	-2.10418	-0.61054
ROMS29	0.111502	-0.0780954	-0.0467777	0.0423842	-0.0251411	-0.0526982	-0.0129821				-1.7004	-0.401019	-1.90608	-1.59317	1.0961	-0.753651
ROMS30	0.15944	-0.0454844	-0.043279	0.114135	0.0299998	0.011939	0.0973523				-1.28528	-0.048488	-3.63719	-0.737155	-0.602033	7.15417
ROMS31	-0.028853	-0.0422951	-0.0410936	-0.0424138	-0.0416024	-0.0340146	-0.0329086				0.465884	-0.0284077	0.0321268	-0.0191316	-0.182387	-0.0325172
ROMS32	0.0099967	-0.118926	-0.104305	-0.0227158	-0.0805354	-0.106881	-0.084874				-12.8966	-0.122942	-0.782218	2.54535	0.327137	-0.205905
ROMS33	0.00171337	-0.083643	-0.0577314	0.0049305	-0.0393764	-0.0660852	-0.0464841				-49.8178	-0.309787	-1.0854	-8.98629	0.678297	-0.296603
ROMS34	0.0957781	-0.478998	-0.0106473	0.0620328	0.0391129	0.00658528	0.0431672				-6.00112	-0.977772	-6.82613	-0.36948	-0.831634	5.55511
ROMS35											#DIV/0!	#DIV/0!	#DIV/0!	#DIV/0!	#DIV/0!	#DIV/0!
RUSS1	0.278719	0.480547	0.572448	0.592181	0.205868	0.16531	0.513969				0.724129	0.191243	0.0344712	-0.652357	-0.197008	2.10912
RUSS2	-0.429053	-0.632812	-0.20068	-0.3847	-0.595494	-0.395897	-0.479199				0.474904	-0.682876	0.916986	0.547942	-0.335178	0.210412
RUSS3	-0.0811507	0.0188236	0.162788	0.151935	-0.110399	-0.176107	0.145917				-1.23196	7.6481	-0.0666721	-1.72662	0.595196	-1.82857
RUSS4	-0.0489103	-0.0211253	-0.0141117	-0.00402667	-0.0266119	-0.0300566	-0.0272925				-0.568082	-0.331999	-0.714658	5.6089	0.129443	-0.091962
RUSS5	-0.0350301	-0.0321603	-0.0401204	-0.041115	-0.0798106	-0.0843993	-0.0539278				-0.0819237	0.247515	0.024789	0.941157	0.0574943	-0.361039
RUSS6	-0.0200517	0.0274068	0.0953394	0.079872	0.0232979	0.021476	0.0363898				-2.36681	2.47868	-0.162235	-0.708309	-0.0781991	0.694438
RUSS7	-0.0954875	-0.503052	-0.0106289	-0.0205861	-0.117302	-0.101603	-0.0519554				4.26825	-0.978871	0.936795	4.69811	-0.133833	-0.488642
RUSS8	-0.0144855	-0.0399373	0.0480637	-0.271492	-0.187368	-0.143381	-0.0583878				1.75706	-2.20348	-6.6486	-0.309861	-0.234761	-0.592779
RUSS9	-0.209422	-0.155395	-0.143116	-0.17039	-0.310724	-0.249042	-0.226599				-0.257982	-0.0790153	0.190569	0.823604	-0.198511	-0.0901172
RUSS10	-0.0993884	0.021441	0.0692821	0.0709501	-0.246731	-0.170733	-0.117269				-1.21573	2.23128	0.0240755	-4.47753	-0.308019	-0.313146
RUSS11	0.168475	0.22144	0.332761	0.305113	0.215412	0.267995	0.307289				0.314381	0.502712	-0.0830859	-0.293994	0.244109	0.146621
RUSS12	-0.0505108	0.00344578	-0.181184	-0.0240503	-0.216068	-0.130313	-0.161863				-1.06822	-53.5815	-0.86726	7.98401	-0.396889	0.242104
RUSS13	-0.184476	-0.242129	-0.188223	-0.208599	-0.281538	-0.232614	-0.224563				0.312521	-0.222634	0.108258	0.349659	-0.173773	-0.0346118
RUSS14	0.00289901	0.0726326	0.149867	0.109145	-0.0391493	-0.0475684	0.0106787				24.0542	1.06336	-0.271719	-1.35869	0.215051	-1.22449
RUSS15	-0.0950353	-0.0692423	-0.0286402	-0.0376644	-0.223409	-0.185929	-0.136368				-0.271404	-0.586377	0.315089	4.93157	-0.167765	-0.266558
RUSS16	-0.0984527	-0.0701629	-0.00638767	0.00318492	-0.02361	-0.0157709	-0.0208819				-0.287344	-0.908959	-1.4986	-8.41306	-0.332023	0.324075
RUSS17	-0.195848	-0.248127	-0.0840605	-0.145209	-0.33029	-0.208309	-0.1776				0.266932	-0.661219	0.72743	1.27459	-0.369315	-0.147418
RUSS18	-0.0648228	0.0396603	0.176108	0.145426	0.00665019	0.00308772	0.0169662				-1.61183	3.44041	-0.174219	-0.954271	-0.535695	4.49475
RUSS19	-0.155214	-0.0698245	-0.0334796	-0.0421585	-0.0933224	-0.0263806	-0.0131682				-0.55014	-0.520517	0.259229	1.21361	-0.717318	-0.500839
RUSS20	-0.0144152	0.114703	0.213837	0.165197	-0.160174	-0.128625	0.0518996				-8.95705	0.864269	-0.22746	-1.96959	-0.196967	-1.40349
RUSS21	-0.125632	-0.0268252	0.0946531	0.0608131	-0.160653	-0.180313	-0.0029303				-0.786478	-4.52851	-0.357516	-3.64174	0.122376	-0.983749
RUSS22	-0.182811	-0.187303	-0.103986	-0.102903	-0.119758	-0.108588	-0.140039				0.0245692	-0.444823	-0.0104219	0.163803	-0.0932741	0.28964
RUSS23	-0.050328	0.0345123	0.0940127	0.0507586	-0.314708	-0.26096	-0.159482				-1.68575	1.72403	-0.460088	-7.20009	-0.170786	-0.388864
RUSS24	-0.134945	-0.0455043	-0.232834	-0.197351	-0.224542	-0.275282	-0.10858				-0.662795	4.11676	-0.152397	0.13778	0.225973	-0.60557
RUSS25	-0.0965748	-0.0840292	-0.0268966	-0.035404	-0.147036	-0.124713	-0.0572874				-0.129906	-0.679913	0.316298	3.15308	-0.151815	-0.540648
RUSS26	-0.185993	-0.259329	-0.145547	-0.148988	-0.327086	-0.252778	-0.206975				0.394289	-0.438756	0.0236473	1.19538	-0.227183	-0.181198
RUSS27	-0.159678	-0.169138	0.0205362	-0.000241533	-0.133647	-0.111412	-0.0961404				0.0592434	-1.12142	-1.01176	552.328	-0.166372	-0.137073
RUSS28	-0.209044	-0.304202	-0.167141	-0.201648	-0.357981	-0.265335	-0.242557				0.455204	-0.450561	0.206457	0.775274	-0.258801	-0.0858472
RUSS29	0.0564382	0.103482	0.294288	0.278272	0.113074	0.1451	0.187597				0.833537	1.84387	-0.0544248	-0.593658	0.283233	0.292879
RUSS30	0.0842286	0.0768684	0.206524	0.182006	-0.0884385	-0.104626	0.0310456				-0.0873841	1.68672	-0.118717	-1.48591	0.183036	-1.29673
RUSS31	-0.31553	-0.426958	-0.223787	-0.277325	-0.420586	-0.325131	-0.325847				0.353146	-0.475858	0.239237	0.516582	-0.226958	0.00220429
RUSS32	-0.0920694	-0.0796973	-0.0547834	-0.0419873	-0.0356796	-0.038336	-0.0573657				-0.134378	-0.312607	-0.233576	-0.150228	0.0744511	0.496394
RUSS33	-0.0419202	-0.0315977	-0.0239663	-0.0196545	-0.0179011	-0.0195501	-0.0185864				-0.246242	-0.241515	-0.179912	-0.0892102	0.0921155	-0.0492915
RUSS34	-0.19935	-0.102786	0.0472839	0.0400489	-0.0987425	-0.105756	-0.0413026				-0.484395	-1.46002	-0.153011	-3.46555	0.0710325	-0.609455
RUSS35			-0.0295054	-0.0307794	-0.0289604	-0.0286487	-0.0287728				#DIV/0!	#DIV/0!	0.0431756	-0.0590972	-0.0107631	0.0043323
SVKS1	0.111227	0.152027	0.130962	-0.0976841	-0.179222	-0.0506582	-0.0845956				0.366824	-0.138562	-1.7459	0.834714	-0.717344	0.669928
SVKS2	-0.334528	-0.500884	-0.422942	-0.285319	-0.312016	-0.263491	-0.231637				0.497288	-0.155609	-0.325395	0.0935683	-0.15552	-0.120891
SVKS3	-0.147426	-0.157857	-0.156165	-0.136461	-0.144454	-0.201432	-0.287847				0.0707534	-0.0107189	-0.126177	0.0585764	0.394438	0.429003
SVKS4	-0.274514	-0.24764	-0.224548	-0.28605	-0.170934	-0.173012	-0.22909				-0.0978977	-0.0932493	0.273894	-0.402433	0.0121569	0.324127
SVKS5	-0.130386	-0.161463	-0.191345	-0.129536	-0.16533	-0.14669	-0.102627				0.238345	0.185066	-0.323022	0.276321	-0.112744	-0.300383
SVKS6	-0.178139	-0.226902	-0.230181	-0.216519	-0.244481	-0.230967	-0.229055				0.27374	0.0144482	-0.0593503	0.129142	-0.0552752	-0.0082789
SVKS7	-0.247058	-0.297455	-0.297572	-0.242793	-0.271079	-0.264241	-0.261625				0.203988	0.000390506	-0.184085	0.116502	-0.025225	-0.00990052
SVKS8	-0.0686252	-0.297479	-0.248568	-0.124329	-0.643027	-0.580347	-0.66586				3.33484	-0.164419	-0.499817	4.17196	-0.0974766	0.147348
SVKS9	-0.374681	-0.396214	-0.359516	-0.410077	-0.462693	-0.469608	-0.527238				0.0574714	-0.0926212	0.140635	0.128309	0.0149441	0.122719
SVKS10	-0.564536	-0.656008	-0.642286	-0.562097	-0.604464	-0.607397	-0.60182				0.162032	-0.0209183	-0.124848	0.0753734	0.00485182	-0.00918274
SVKS11	-0.216906	-0.276909	-0.27649	-0.296837	-0.320879	-0.383332	-0.247484				0.276627	-0.00151077	0.0735905	0.0809916	0.194631	-0.354386
SVKS12	-0.725978	-0.716651	-0.708863	-0.673813	-0.743125	-0.744228	-0.708173				-0.0128473	-0.0108679	-0.0494446	0.102865	0.00148418	-0.0484465
SVKS13	-0.738475	-0.772058	-0.735179	-0.693116	-0.682643	-0.672429	-0.697736				0.0454758	-0.047767	-0.0572146	-0.0151105	-0.0149617	0.0376353
SVKS14	-0.645991	-0.704661	-0.691226	-0.668139	-0.830555	-0.839958	-0.752818				0.0908211	-0.0190654	-0.0334009	0.243088	0.0113209	-0.103743
SVKS15	-0.898777	-0.850543	-0.850543	-0.826785	-0.888488	-0.88853	-0.85758				-0.0536659	8.48793e-08	-0.0279332	0.0746309	4.72568e-05	-0.034833
SVKS16	-0.217861	-0.221918	-0.249794	-0.193438	-0.227168	-0.21137	-0.149402				0.0186222	0.125618	-0.225611	0.174369	-0.0695443	-0.293171
SVKS17	-0.274367	-0.424304	-0.377432	-0.203995	-0.413395	-0.423763	-0.3528				0.546482	-0.110468	-0.459519	1.0265	0.025079	-0.167457
SVKS18	-0.217064	-0.371882	-0.352817	-0.245315	-0.364456	-0.362934	-0.296074				0.713238	-0.0512658	-0.304698	0.485667	-0.0041755	-0.184222
SVKS19	-0.14636	-0.198699	-0.218102	-0.180392	-0.199498	-0.163176	-0.175585				0.357602	0.0976539	-0.172904	0.105917	-0.182066	0.0760436
SVKS20	-0.181842	-0.282851	-0.26774	-0.183467	-0.287357	-0.269366	-0.219609				0.555482	-0.0534243	-0.314759	0.566263	-0.0626083	-0.184719
SVKS21	-0.230499	-0.362065	-0.342187	-0.241822	-0.352442	-0.359968	-0.281883				0.570791	-0.0549019	-0.293306	0.457444	0.0213553	-0.216923
SVKS22	-0.264564	-0.331682	-0.319364	-0.254792	-0.288207	-0.303904	-0.269261				0.253691	-0.037138	-0.202191	0.131146	0.0544654	-0.113992
SVKS23	0.0461048	-0.328009	-0.255801	-0.0501235	-0.136501	-0.104911	0.00373139				-8.11442	-0.220139	-0.804053	1.72329	-0.231429	-1.03557
SVKS24	-0.104068	-0.110375	-0.0971427	-0.113583	-0.0926772	-0.0897548	-0.0899834				0.0606098	-0.119885	0.169242	-0.184059	-0.031534	0.0025476
SVKS25	-0.160916	-0.184332	-0.177005	-0.0928047	-0.108019	-0.131518	-0.131448				0.145517	-0.0397533	-0.475693	0.163934	0.217555	-0.000533628
SVKS26	0.0617945	-0.213173	-0.110819	0.118631	0.0243553	-0.0586999	0.0910665				-4.44971	-0.480147	-2.07049	-0.794697	-3.41015	-2.55139
SVKS27	-0.235986	-0.38915	-0.225691	-0.168546	-0.21267	-0.198844	-0.195928				0.649039	-0.420042	-0.2532	0.261795	-0.0650142	-0.0146614
SVKS28	-0.230231	-0.301874	-0.287752	-0.106076	-0.277939	-0.258211	-0.248226				0.31118	-0.0467827	-0.631363	1.62018	-0.070977	-0.0386707
SVKS29	-0.41721	-0.744272	-0.355135	-0.276237	-0.353536	-0.353827	-0.315737				0.783927	-0.522842	-0.222164	0.279827	0.00082548	-0.107651
SVKS30	-0.321765	-0.489656	-0.468761	-0.273688	-0.495943	-0.503462	-0.401507				0.521781	-0.0426733	-0.416145	0.812072	0.0151597	-0.202506
SVKS31	-0.176042	-0.20123	-0.20787	-0.149245	-0.191568	-0.171409	-0.169591				0.143082	0.0329986	-0.282027	0.283577	-0.105228	-0.0106065
SVKS32	-0.179916	-0.287056	-0.182712	-0.173558	-0.162924	-0.164648	-0.14381				0.595495	-0.363495	-0.0501033	-0.0612702	0.0105861	-0.126561
SVKS33	-0.168193	-0.24155	-0.172633	-0.176661	-0.168995	-0.157716	-0.147925				0.436149	-0.285313	0.0233352	-0.0433932	-0.066742	-0.0620787
SVKS34	-0.23658	-0.59313	-0.212065	-0.0493647	-0.177907	-0.187454	-0.149623				1.5071	-0.642465	-0.767219	2.60393	0.0536653	-0.201819
SVKS35											#DIV/0!	#DIV/0!	#DIV/0!	#DIV/0!	#DIV/0!	#DIV/0!
SVNS1	-0.500024	-0.668875	-0.676664	-0.683487	-0.748049	-0.748205	-0.62299				0.337687	0.0116445	0.0100832	0.0944597	0.000208879	-0.167353
SVNS2	-0.362356	-0.447215	-0.379249	-0.218223	-0.299338	-0.346923	-0.264694				0.234187	-0.151976	-0.424592	0.371709	0.158966	-0.237022
SVNS3	-0.208462	-0.284905	-0.234054	-0.314428	-0.443722	-0.544052	-0.188985				0.366702	-0.178484	0.343396	0.411205	0.22611	-0.652634
SVNS4	-0.295684	-0.377484	-0.322797	-0.45123	-0.392738	-0.406169	-0.219367				0.276648	-0.144874	0.397877	-0.129628	0.0341998	-0.459913
SVNS5	-0.27394	-0.107471	-0.113366	-0.137052	-0.228257	-0.166408	-0.115953				-0.607685	0.0548554	0.20893	0.665478	-0.27096	-0.303203
SVNS6	-0.639375	-0.467234	-0.430155	-0.415293	-0.520784	-0.551707	-0.467349				-0.269233	-0.0793595	-0.0345505	0.254018	0.0593764	-0.152903
SVNS7	-0.276786	-0.351931	-0.282541	-0.253614	-0.239074	-0.446285	-0.197023				0.271491	-0.19717	-0.10238	-0.0573298	0.866721	-0.558526
SVNS8	-0.0503738	-0.0353231	-0.0427864	-0.0387645	-0.0413933	-0.045077	-0.0379472				-0.29878	0.211286	-0.0939996	0.0678139	0.0889926	-0.15817
SVNS9	-0.603759	-0.636407	-0.664326	-0.867173	-0.899395	-0.900967	-0.871125				0.0540745	0.0438696	0.305344	0.0371578	0.00174746	-0.0331224
SVNS10	-0.583831	-0.584707	-0.489028	-0.577423	-0.513531	-0.460405	-0.394059				0.00150074	-0.163635	0.180756	-0.110651	-0.103452	-0.144104
SVNS11	-0.334444	-0.404452	-0.194204	-0.161165	-0.280525	-0.344663	-0.140206				0.209327	-0.519834	-0.170124	0.740606	0.228634	-0.593207
SVNS12	-0.833098	-0.798837	-0.729315	-0.694308	-0.736947	-0.76167	-0.651886				-0.0411243	-0.0870287	-0.0480002	0.061412	0.0335476	-0.144136
SVNS13	-0.705632	-0.706134	-0.65854	-0.662087	-0.5891	-0.543022	-0.537947				0.000710358	-0.0673997	0.00538556	-0.110238	-0.0782183	-0.00934587
SVNS14	-0.725755	-0.671065	-0.630503	-0.721263	-0.815773	-0.691429	-0.561535				-0.0753556	-0.0604442	0.143949	0.131034	-0.152424	-0.187864
SVNS15	-0.847823	-0.813663	-0.775263	-0.764146	-0.80325	-0.764086	-0.685306				-0.0402919	-0.047194	-0.0143394	0.051174	-0.0487569	-0.103105
SVNS16	-0.37619	-0.390264	-0.287819	-0.313789	-0.266688	-0.241999	-0.173458				0.0374124	-0.262502	0.0902309	-0.150104	-0.0925751	-0.283228
SVNS17	-0.536418	-0.507187	-0.512591	-0.430686	-0.513381	-0.564534	-0.443343				-0.0544929	0.0106553	-0.159786	0.192008	0.0996377	-0.214673
SVNS18	-0.448662	-0.594544	-0.132837	-0.0505989	-0.0666575	-0.222831	-0.0919292				0.32515	-0.776573	-0.61909	0.317371	2.34293	-0.587449
SVNS19	-0.239721	-0.434453	-0.247319	-0.29652	-0.206396	-0.203354	-0.168324				0.812326	-0.430735	0.19894	-0.30394	-0.0147381	-0.17226
SVNS20	-0.326636	-0.288274	-0.11249	-0.355826	-0.198801	-0.187588	-0.2255				-0.117447	-0.609781	2.16319	-0.441298	-0.0564052	0.202107
SVNS21	-0.171431	-0.30218	-0.188023	-0.263503	-0.176558	-0.219895	-0.155105				0.762693	-0.377779	0.401442	-0.329957	0.245454	-0.294641
SVNS22	-0.288079	-0.416532	-0.302677	-0.254752	-0.241892	-0.3078	-0.221614				0.445897	-0.273341	-0.158336	-0.0504821	0.272469	-0.280007
SVNS23	-0.24855	-0.550713	-0.221983	-0.318352	-0.127573	-0.0915918	-0.0988311				1.2157	-0.596918	0.434129	-0.59927	-0.282044	0.0790398
SVNS24	-0.111994	-0.11782	-0.0964772	-0.102921	-0.100581	-0.0953239	-0.0810733				0.0520193	-0.181146	0.0667916	-0.0227377	-0.0522664	-0.149496
SVNS25	-0.162594	-0.173008	-0.143235	-0.0958886	-0.0893384	-0.0882628	-0.086139				0.064051	-0.172089	-0.330552	-0.0683104	-0.0120395	-0.024062
SVNS26	-0.499871	-0.731768	-0.40795	-0.5967	-0.38825	-0.448392	-0.418392				0.463912	-0.442515	0.462681	-0.349338	0.154905	-0.0669054
SVNS27	-0.256747	-0.302872	-0.248335	-0.231323	-0.217465	-0.221148	-0.163647				0.179652	-0.180065	-0.0685051	-0.0599083	0.0169335	-0.26001
SVNS28	-0.267864	-0.367911	-0.275258	-0.236876	-0.226689	-0.287944	-0.206337				0.373502	-0.251835	-0.139441	-0.0430044	0.270214	-0.283412
SVNS29	-0.193325	-0.304222	-0.190207	-0.155453	-0.150314	-0.212753	-0.151168				0.573634	-0.374775	-0.182717	-0.0330605	0.415392	-0.289465
SVNS30	-0.361051	-0.598431	-0.40684	-0.30774	-0.281491	-0.460464	-0.315891				0.657468	-0.320155	-0.243586	-0.0852945	0.635804	-0.313973
SVNS31	-0.231175	-0.264207	-0.229026	-0.216526	-0.20515	-0.206477	-0.155424				0.14289	-0.133159	-0.0545766	-0.0525412	0.00646821	-0.247257
SVNS32	-0.227036	-0.256584	-0.226531	-0.209533	-0.198532	-0.198819	-0.149122				0.130147	-0.117129	-0.0750335	-0.0525015	0.00144488	-0.249964
SVNS33	-0.198724	-0.234661	-0.175702	-0.171199	-0.169309	-0.170974	-0.127671				0.180838	-0.251251	-0.0256297	-0.0110388	0.00983159	-0.25327
SVNS34	-0.382178	-0.522607	-0.28195	-0.248975	-0.235527	-0.298431	-0.213779				0.367444	-0.460493	-0.116955	-0.0540125	0.26708	-0.283658
SVNS35	-0.0285714	-0.0285714	-0.0285714	-0.0285714							-1.77855e-07	6.31689e-07	-5.77081e-07	-1	#DIV/0!	#DIV/0!
SWES1	0.0349842	0.170359	0.24161	0.172111	-0.0106513	0.134771	0.039037				3.8696	0.418238	-0.287649	-1.06189	-13.653	-0.710345
SWES2	-0.292948	-0.204439	-0.149449	-0.13422	-0.30475	-0.160559	-0.140737				-0.302132	-0.268981	-0.1019	1.27053	-0.473145	-0.123461
SWES3	0.150286	-0.00647403	0.144387	0.226363	-0.108809	-0.0189	-0.163295				-1.04308	-23.3026	0.56775	-1.48068	-0.8263	7.63995
SWES4	-0.0952139	-0.0902678	-0.0489707	-0.0414192	-0.0816577	-0.0498418	-0.0753123				-0.051947	-0.457495	-0.154206	0.971496	-0.389625	0.511027
SWES5	-0.042029	-0.054595	-0.058811	-0.0500109	-0.0498847	-0.0476022	-0.0396709				0.298984	0.0772231	-0.149633	-0.00252368	-0.0457554	-0.166616
SWES6	0.262545	-0.202422	0.237719	0.353526	-0.00230057	0.177474	-0.0823575				-1.771	-2.17437	0.487164	-1.00651	-78.1436	-1.46405
SWES7	-0.422612	-0.111731	-0.141713	-0.192026	-0.478117	-0.280306	-0.389822				-0.735618	0.268335	0.355036	1.48986	-0.41373	0.390705
SWES8	-0.524589	-0.579315	-0.474819	-0.537728	-0.517792	-0.443707	-0.421132				0.104321	-0.180379	0.132491	-0.0370735	-0.143079	-0.0508797
SWES9	-0.441966	-0.645431	-0.594416	-0.501454	-0.660951	-0.573221	-0.610088				0.460363	-0.0790405	-0.156392	0.31807	-0.132733	0.0643154
SWES10	-0.0299749	-0.294576	-0.0570307	-0.0179308	-0.233296	-0.0927473	-0.227965				8.82743	-0.806397	-0.685594	12.0109	-0.602448	1.45791
SWES11	0.265361	0.0251654	0.248641	0.355358	-0.0503326	0.095963	-0.132083				-0.905165	8.88024	0.429204	-1.14164	-2.90658	-2.3764
SWES12	-0.501862	-0.300726	-0.387476	-0.46293	-0.727428	-0.596498	-0.51831				-0.40078	0.288471	0.194731	0.571357	-0.17999	-0.131079
SWES13	-0.244084	-0.149634	-0.00882376	0.11528	-0.199923	-0.115789	-0.236761				-0.386957	-0.941031	-14.0648	-2.73423	-0.420832	1.04476
SWES14	-0.58967	-0.107674	-0.0325115	-0.581594	-0.646769	-0.598538	-0.37095				-0.8174	-0.698056	16.8889	0.112062	-0.0745713	-0.380241
SWES15	-0.294665	-0.0894167	-0.238885	0.198652	-0.415177	-0.237548	-0.546049				-0.696548	1.6716	-1.83158	-3.08997	-0.427841	1.29869
SWES16	0.0915744	-0.0875053	-0.016591	0.0275028	-0.111695	-0.0952988	-0.144877				-1.95557	-0.8104	-2.65769	-5.06121	-0.146794	0.520234
SWES17	0.20072	-0.0544568	0.157766	0.267472	-0.11827	0.0466015	-0.156261				-1.27131	-3.89708	0.695372	-1.44218	-1.39403	-4.35314
SWES18	0.486431	0.283667	0.478031	0.583234	0.165505	0.371004	0.102361				-0.416841	0.685186	0.220076	-0.716229	1.24165	-0.724097
SWES19	-0.0041602	0.0530861	0.206692	0.275299	-0.0193312	0.141383	-0.0214046				-13.7605	2.89353	0.331924	-1.07022	-8.31369	-1.15139
SWES20	0.0337221	0.111495	0.315542	0.305746	-0.0517149	0.14431	-0.0741714				2.30628	1.83011	-0.0310454	-1.16914	-3.79049	-1.51397
SWES21	-0.0426708	-0.207705	-0.0343891	0.0888117	-0.186349	-0.124019	-0.207868				3.86763	-0.834433	-3.58255	-3.09825	-0.334482	0.676103
SWES22	0.0785135	-0.110683	0.14249	0.273938	-0.188534	-0.0252965	-0.250664				-2.40973	-2.28737	0.922502	-1.68824	-0.865825	8.90903
SWES23	0.0475241	0.0509028	0.284242	0.376613	-0.026834	0.160776	-0.0700269				0.0710938	4.58401	0.324975	-1.07125	-6.99151	-1.43556
SWES24	-0.373151	-0.362286	-0.339184	-0.281663	-0.389378	-0.367595	-0.201573				-0.0291181	-0.0637659	-0.169587	0.382423	-0.055942	-0.451643
SWES25	-0.179968	-0.17216	0.00185569	-0.0183911	-0.121408	-0.0959122	-0.131089				-0.0433867	-1.01078	-10.9106	5.60144	-0.21	0.36676
SWES26	-0.293917	-0.38385	0.232191	0.0122758	-0.476688	-0.127824	0.0145072				0.305985	-1.6049	-0.947131	-39.8314	-0.731849	-1.11349
SWES27	0.230991	-0.048288	0.218248	0.284689	-0.17525	-0.0450833	-0.249225				-1.20905	-5.51972	0.304428	-1.61558	-0.742749	4.5281
SWES28	0.436354	0.131397	0.339374	0.480157	0.0431614	0.242717	-0.032593				-0.698875	1.58281	0.414829	-0.91011	4.62347	-1.13428
SWES29	0.449721	0.188202	0.436957	0.575532	0.0930827	0.323326	0.020966				-0.581513	1.32174	0.317137	-0.838267	2.47353	-0.935155
SWES30	0.377441	0.141754	0.474218	0.588136	-0.0415554	0.233865	-0.1525				-0.624435	2.34536	0.240222	-1.07066	-6.62779	-1.65209
SWES31	0.22541	-0.0833274	0.104724	0.266161	-0.186064	-0.0111325	-0.198325				-1.36967	-2.25678	1.54155	-1.69907	-0.940169	16.815
SWES32	0.0769192	-0.124916	-0.0252893	0.073613	-0.164973	-0.114486	-0.211203				-2.62399	-0.797549	-3.91083	-3.24108	-0.30603	0.844794
SWES33	-0.0416534	-0.134987	-0.0499479	0.0378196	-0.152203	-0.124927	-0.199926				2.24071	-0.629979	-1.75718	-5.02444	-0.179204	0.600339
SWES34	0.0658968	-0.058361	0.211679	0.341342	-0.117882	0.22076	-0.114765				-1.88564	-4.62707	0.612544	-1.34535	-2.87273	-1.51986
SWES35	-0.0418116	-0.0317569									-0.240476	-1	#DIV/0!	#DIV/0!	#DIV/0!	#DIV/0!
TURS1	0.555655	0.507071	0.464829	0.503241	0.372023	0.354246	0.420048				-0.0874361	-0.0833052	0.0826377	-0.260746	-0.0477862	0.185753
TURS2	0.0339191	-0.115461	-0.15586	-0.385283	-0.351706	-0.245099	-0.162889				-4.40402	0.349885	1.47199	-0.0871498	-0.303113	-0.335417
TURS3	0.236316	0.189594	0.148615	0.0637196	-0.0232631	-0.0129834	0.140863				-0.197708	-0.216144	-0.571242	-1.36509	-0.441889	-11.8495
TURS4	-0.126917	-0.366667	-0.149013	-0.528097	-0.53594	-0.500312	-0.398289				1.88902	-0.593602	2.54397	0.0148513	-0.0664764	-0.20392
TURS5	-0.0649013	-0.211125	-0.0849198	-0.261722	-0.241762	-0.232035	-0.181367				2.25301	-0.597774	2.08199	-0.0762643	-0.0402324	-0.218363
TURS6	0.0161601	-0.0965515	-0.0869475	-0.0925104	-0.0928088	-0.0452815	0.047885				-6.9747	-0.0994702	0.06398	0.00322566	-0.512099	-2.0575
TURS7	0.102121	-0.0382937	-0.0524741	-0.146561	-0.14847	-0.132676	0.00482762				-1.37499	0.370305	1.79301	0.0130269	-0.106377	-1.03639
TURS8	-0.0634114	-0.232029	-0.12397	-0.341375	-0.396077	-0.368924	-0.237622				2.65911	-0.465715	1.7537	0.16024	-0.0685567	-0.355904
TURS9	0.018951	-0.234047	0.00362917	-0.245391	-0.353877	-0.31241	-0.142802				-13.3501	-1.01551	-68.6162	0.442096	-0.117179	-0.542903
TURS10	-0.114564	-0.436796	-0.0345533	-0.316616	-0.484877	-0.496878	-0.358136				2.81269	-0.920894	8.16309	0.531437	0.0247517	-0.279227
TURS11	-0.241237	-0.172201	0.0914523	0.0327945	-0.315234	-0.334299	-0.0612354				-0.286176	-1.53108	-0.641403	-10.6124	0.0604786	-0.816824
TURS12	-0.49518	-0.718153	-0.704582	-0.788916	-0.813734	-0.798098	-0.654764				0.450286	-0.0188961	0.119693	0.0314579	-0.019215	-0.179594
TURS13	-0.342403	-0.107785	-0.0833654	-0.345712	-0.466152	-0.4477	-0.338481				-0.685211	-0.226557	3.14694	0.348383	-0.0395821	-0.243957
TURS14	-0.376308	-0.395812	-0.0790302	-0.432339	-0.473465	-0.422814	-0.220993				0.0518298	-0.800334	4.47056	0.0951251	-0.10698	-0.477327
TURS15	-0.630095	-0.748819	-0.598336	-0.64257	-0.697954	-0.68326	-0.570459				0.188421	-0.200961	0.0739289	0.0861909	-0.0210523	-0.165092
TURS16	-0.0397713	-0.284865	-0.0933591	-0.221355	-0.34529	-0.275959	-0.205995				6.16257	-0.672269	1.37101	0.559891	-0.200792	-0.253532
TURS17	-0.418608	-0.570906	-0.498344	-0.609853	-0.649497	-0.615538	-0.476678				0.363821	-0.1271	0.22376	0.0650063	-0.052285	-0.225592
TURS18	-0.0137064	-0.18	0.0194339	-0.217591	-0.233699	-0.194407	-0.139777				12.1325	-1.10797	-12.1965	0.0740264	-0.168128	-0.281011
TURS19	-0.0593445	-0.215764	-0.192378	-0.335914	-0.377768	-0.341306	-0.163552				2.63578	-0.108386	0.746116	0.124597	-0.0965204	-0.520804
TURS20	-0.163115	-0.423521	-0.28597	-0.478906	-0.553749	-0.501925	-0.291677				1.59645	-0.324779	0.67467	0.15628	-0.0935877	-0.418883
TURS21	-0.195358	-0.433354	-0.298275	-0.552556	-0.610061	-0.578422	-0.382263				1.21826	-0.311705	0.852504	0.104071	-0.0518623	-0.339128
TURS22	-0.0874027	-0.138069	-0.138557	-0.220811	-0.24882	-0.228428	-0.082829				0.579688	0.00353219	0.593651	0.126848	-0.0819571	-0.637395
TURS23	-0.0966712	-0.323478	-0.217861	-0.507623	-0.562132	-0.484276	-0.304738				2.34617	-0.326505	1.33003	0.107382	-0.138502	-0.370735
TURS24	-0.170574	-0.29025	-0.184527	-0.299512	-0.303512	-0.291135	-0.233644				0.701607	-0.364247	0.623134	0.0133534	-0.0407781	-0.197474
TURS25	-0.0680188	-0.151238	-0.12613	-0.187335	-0.214316	-0.220476	-0.112484				1.22347	-0.166017	0.485254	0.144025	0.028745	-0.489813
TURS26	-0.0964362	-0.214168	-0.148953	-0.363902	-0.408908	-0.344908	-0.154839				1.22083	-0.304507	1.44307	0.123677	-0.156515	-0.551072
TURS27	0.0268343	-0.236689	-0.207646	-0.299353	-0.305622	-0.304146	-0.225203				-9.82041	-0.122708	0.441651	0.020944	-0.00482842	-0.259556
TURS28	0.160402	-0.113664	0.0939218	-0.269038	-0.397435	-0.327212	-0.0956412				-1.70862	-1.82631	-3.86449	0.477245	-0.176691	-0.707709
TURS29	-0.0160732	-0.240415	-0.104961	-0.319866	-0.415076	-0.397559	-0.257423				13.9575	-0.563418	2.04748	0.297654	-0.0422006	-0.352492
TURS30	0.253573	0.0148856	0.0726369	-0.134912	-0.227468	-0.183079	0.125693				-0.941297	3.87968	-2.85735	0.686048	-0.195143	-1.68655
TURS31	0.0219018	-0.0182117	-0.0696856	-0.065463	-0.085804	-0.0586243	-0.0251514				-1.83152	2.82642	-0.0605949	0.310725	-0.316764	-0.570974
TURS32	-0.00564439	-0.0679022	-0.0867986	-0.148354	-0.114378	-0.0927499	-0.04334				11.03	0.278289	0.709177	-0.229017	-0.189096	-0.532722
TURS33	-0.111239	-0.212801	-0.189324	-0.136786	-0.2481	-0.179661	-0.0783231				0.913002	-0.110326	-0.277502	0.813785	-0.275852	-0.564051
TURS34	0.1173	-0.0277795	-0.100146	-0.134256	-0.218541	-0.163832	-0.0322294				-1.23682	2.60502	0.34061	0.627789	-0.250337	-0.803278
TURS35	-0.0286256	-0.0288696	-0.0288461	-0.0286449	-0.0286278	-0.0285915	-0.0285954				0.00852095	-0.00081209	-0.00697432	-0.000599552	-0.00126781	0.000137561
TAPS1	0.206218	0.107531	0.106865	0.0863846	0.100432	0.0730339	0.209555				-0.478559	-0.00618922	-0.191649	0.162613	-0.272802	1.86928
TAPS2	-0.231189	-0.236055	-0.237974	-0.225481	-0.232334	-0.231573	-0.218095				0.0210488	0.0081286	-0.0524994	0.0303935	-0.00327468	-0.0582005
TAPS3	0.0625862	-0.0143796	-0.0297248	-0.0510512	-0.0415685	-0.0605085	0.100914				-1.22976	1.06715	0.717458	-0.185748	0.455633	-2.66777
TAPS4	-0.57713	-0.510464	-0.51889	-0.468829	-0.457524	-0.534929	-0.412425				-0.115513	0.0165063	-0.0964775	-0.0241133	0.169184	-0.22901
TAPS5	-0.151107	-0.191737	-0.15608	-0.14748	-0.108942	-0.109997	-0.118911				0.268885	-0.185971	-0.0550953	-0.261314	0.00968843	0.0810385
TAPS6	-0.127933	-0.18211	-0.166321	-0.17548	-0.172409	-0.172053	-0.125037				0.423482	-0.0867004	0.0550695	-0.0174978	-0.00206861	-0.273266
TAPS7	-0.259506	-0.298241	-0.275428	-0.277938	-0.255976	-0.25382	-0.20537				0.149262	-0.0764908	0.00911454	-0.0790201	-0.00842254	-0.190884
TAPS8	-0.606885	-0.619982	-0.603993	-0.568036	-0.603291	-0.600421	-0.556943				0.0215798	-0.0257892	-0.0595322	0.0620648	-0.00475767	-0.0724117
TAPS9	-0.7784	-0.785802	-0.769115	-0.739814	-0.774838	-0.774529	-0.744769				0.00950901	-0.0212352	-0.0380976	0.0473413	-0.000398228	-0.0384232
TAPS10	-0.570764	-0.706082	-0.648237	-0.63542	-0.588522	-0.547589	-0.508334				0.237081	-0.0819236	-0.0197712	-0.0738067	-0.069553	-0.071686
TAPS11	-0.602027	-0.704435	-0.634706	-0.604058	-0.54257	-0.505297	-0.465307				0.170104	-0.0989856	-0.0482876	-0.101791	-0.0686969	-0.079142
TAPS12	-0.508077	-0.664464	-0.565721	-0.521994	-0.478631	-0.439115	-0.381932				0.307802	-0.148606	-0.0772934	-0.0830725	-0.0825605	-0.130223
TAPS13	-0.408546	-0.730536	-0.482839	-0.487467	-0.564549	-0.465702	-0.484983				0.788135	-0.339062	0.00958637	0.158126	-0.175089	0.0414019
TAPS14	-0.927332	-0.958863	-0.93942	-0.926594	-0.927253	-0.930272	-0.933723				0.0340017	-0.0202775	-0.0136526	0.000710961	0.00325552	0.00370963
TAPS15	-0.511289	-0.576637	-0.579258	-0.603845	-0.581648	-0.633875	-0.669864				0.12781	0.00454586	0.0424451	-0.0367581	0.0897914	0.0567753
TAPS16	-0.1421	-0.0786122	-0.0694196	-0.0802281	-0.071923	-0.0766762	-0.0658238				-0.446783	-0.116936	0.155698	-0.103519	0.0660881	-0.141535
TAPS17	-0.495468	-0.656928	-0.570204	-0.542838	-0.537348	-0.523187	-0.480767				0.325874	-0.132015	-0.0479925	-0.0101134	-0.026355	-0.0810786
TAPS18	-0.157765	-0.221753	-0.209323	-0.230645	-0.224042	-0.214385	-0.0463608				0.405589	-0.0560529	0.10186	-0.0286265	-0.043102	-0.78375
TAPS19	-0.205554	-0.181738	-0.157492	-0.164718	-0.171128	-0.163297	-0.0782661				-0.115863	-0.133408	0.0458782	0.0389151	-0.0457615	-0.520712
TAPS20	-0.565061	-0.726451	-0.662243	-0.635622	-0.588659	-0.590181	-0.573825				0.285615	-0.0883852	-0.0401981	-0.0738857	0.0025855	-0.0277135
TAPS21	-0.351127	-0.576192	-0.450917	-0.404733	-0.325567	-0.319577	-0.279586				0.64098	-0.217419	-0.102423	-0.1956	-0.0183985	-0.125136
TAPS22	-0.342458	-0.405815	-0.381203	-0.383474	-0.356035	-0.367997	-0.308304				0.185007	-0.0606483	0.00595656	-0.0715534	0.0335979	-0.16221
TAPS23	-0.132187	-0.389382	-0.244831	-0.18816	-0.18481	-0.186478	-0.121195				1.94569	-0.371234	-0.231467	-0.0178054	0.00902294	-0.350081
TAPS24	-0.420274	-0.543383	-0.419729	-0.343115	-0.42597	-0.477899	-0.193837				0.292925	-0.227564	-0.182532	0.241478	0.121909	-0.594397
TAPS25	-0.296772	-0.45539	-0.293412	-0.141253	-0.139922	-0.136664	-0.0925092				0.534479	-0.355692	-0.518585	-0.00942187	-0.0232819	-0.323091
TAPS26	-0.225616	-0.36845	-0.169377	-0.160693	-0.282828	-0.272994	-0.151656				0.633087	-0.540298	-0.0512695	0.760049	-0.0347724	-0.44447
TAPS27	-0.278935	-0.283129	-0.282823	-0.298706	-0.286919	-0.27055	-0.165765				0.0150362	-0.00107872	0.0561589	-0.0394616	-0.0570492	-0.387303
TAPS28	-0.418863	-0.649676	-0.55893	-0.504608	-0.421197	-0.437042	-0.449074				0.551044	-0.139679	-0.097189	-0.165298	0.0376185	0.0275308
TAPS29	-0.233353	-0.349643	-0.330473	-0.347522	-0.339564	-0.333475	-0.178517				0.498346	-0.0548271	0.0515898	-0.0229011	-0.0179301	-0.464678
TAPS30	-0.348134	-0.474687	-0.439299	-0.434655	-0.39864	-0.396583	-0.293519				0.363519	-0.0745517	-0.0105703	-0.0828591	-0.00515937	-0.25988
TAPS31	-0.206811	-0.292731	-0.26074	-0.227774	-0.194454	-0.199231	-0.240447				0.415456	-0.109285	-0.126432	-0.146288	0.0245652	0.206875
TAPS32	-0.083081	-0.0937963	-0.0797716	-0.0737563	-0.0612608	-0.0687506	-0.0878226				0.128973	-0.149522	-0.0754072	-0.169416	0.122262	0.277408
TAPS33	-0.0615897	-0.0670035	-0.0592784	-0.0538394	-0.0441573	-0.0433623	-0.0584614				0.0879019	-0.115294	-0.0917546	-0.179832	-0.0180041	0.348207
TAPS34	-0.324741	-0.407712	-0.343862	-0.29368	-0.312628	-0.247962	-0.15503				0.255498	-0.156605	-0.145938	0.0645221	-0.206847	-0.374784
TAPS35	-0.0292254	-0.0310795	-0.0311864	-0.0289552	-0.0293169	-0.0286743	-0.0289351				0.0634417	0.0034388	-0.0715445	0.0124917	-0.0219182	0.00909558
USAS1	0.746138	0.773718	0.800728	0.759526	0.672714	0.691514	0.766585				0.0369644	0.0349097	-0.0514561	-0.114298	0.0279459	0.108561
USAS2	0.754156	0.762562	0.783303	0.731484	0.735786	0.773393	0.818941				0.0111465	0.0271997	-0.0661552	0.00588166	0.0511111	0.0588942
USAS3	0.708205	0.755435	0.785339	0.717496	0.659927	0.664069	0.751193				0.0666896	0.0395846	-0.0863867	-0.0802355	0.00627632	0.131197
USAS4	0.239798	0.232702	0.186904	0.271747	0.214766	0.214672	0.301763				-0.0295932	-0.19681	0.453939	-0.209682	-0.000439039	0.405696
USAS5	0.0717127	0.0531487	0.0715448	0.0227979	0.011024	0.00985927	0.017908				-0.258866	0.346126	-0.681348	-0.516446	-0.105657	0.816357
USAS6	0.651361	0.659785	0.693292	0.674928	0.636731	0.628785	0.718824				0.0129331	0.0507851	-0.0264887	-0.0565936	-0.0124792	0.143196
USAS7	0.717758	0.741459	0.784219	0.630773	0.576815	0.580813	0.681402				0.033021	0.0576702	-0.195667	-0.0855425	0.00693149	0.173185
USAS8	0.712563	0.709172	0.739944	0.726327	0.725301	0.755009	0.814493				-0.00475882	0.0433909	-0.0184032	-0.00141146	0.040959	0.0787856
USAS9	0.605508	0.594322	0.690611	0.680437	0.634707	0.63957	0.719219				-0.0184737	0.162014	-0.0147322	-0.0672064	0.00766202	0.124535
USAS10	0.581237	0.583277	0.627183	0.638507	0.57524	0.570795	0.67411				0.00350912	0.0752745	0.0180554	-0.0990856	-0.00772732	0.181001
USAS11	0.697213	0.717486	0.739981	0.730301	0.677074	0.672656	0.76153				0.0290763	0.0313526	-0.0130817	-0.0728837	-0.00652526	0.132125
USAS12	0.74703	0.726568	0.788103	0.772431	0.711348	0.735775	0.809908				-0.027391	0.0846938	-0.0198857	-0.0790789	0.0343382	0.100756
USAS13	0.540215	0.584046	0.605752	0.634409	0.566531	0.564551	0.68467				0.0811362	0.0371642	0.0473076	-0.106993	-0.00349639	0.212769
USAS14	0.635812	0.375486	0.557472	0.513577	0.276847	0.472797	0.700888				-0.409439	0.484669	-0.0787396	-0.460944	0.707794	0.482429
USAS15	0.612606	0.525654	0.50131	0.705815	0.659547	0.666845	0.762274				-0.141938	-0.0463118	0.407941	-0.0655514	0.0110646	0.143105
USAS16	0.528327	0.492917	0.548663	0.568303	0.494662	0.487127	0.606573				-0.0670232	0.113094	0.0357959	-0.12958	-0.0152313	0.245204
USAS17	0.751741	0.746893	0.796019	0.757351	0.710908	0.714096	0.78566				-0.00644956	0.0657736	-0.0485766	-0.0613221	0.00448347	0.100217
USAS18	0.818028	0.834548	0.854656	0.817071	0.783695	0.782344	0.84873				0.0201944	0.0240943	-0.0439764	-0.0408478	-0.00172395	0.0848548
USAS19	0.431557	0.562191	0.53928	0.411925	0.384185	0.399479	0.513318				0.302705	-0.0407532	-0.236157	-0.0673416	0.0398086	0.284967
USAS20	0.776125	0.781762	0.824451	0.810322	0.778606	0.778783	0.843495				0.00726293	0.054606	-0.0171375	-0.0391395	0.000226641	0.0830946
USAS21	0.774825	0.791454	0.821719	0.734574	0.681238	0.676346	0.771616				0.0214618	0.0382406	-0.106052	-0.0726086	-0.00718103	0.14086
USAS22	0.761729	0.774295	0.817581	0.741853	0.725324	0.74206	0.82363				0.016496	0.0559046	-0.0926254	-0.0222806	0.0230738	0.109924
USAS23	0.658126	0.657321	0.709701	0.711204	0.6774	0.691102	0.768507				-0.00122263	0.0796857	0.00211832	-0.0475302	0.0202265	0.112003
USAS24	0.387278	0.285004	0.354073	0.293682	0.223561	0.271266	0.351054				-0.264084	0.242342	-0.170561	-0.238764	0.213385	0.294135
USAS25	0.514305	0.543904	0.621273	0.448167	0.462066	0.559708	0.684845				0.0575506	0.142249	-0.278631	0.0310118	0.211316	0.223575
USAS26	0.727819	0.725159	0.776704	0.758334	0.732735	0.735696	0.804183				-0.00365413	0.0710801	-0.0236502	-0.0337575	0.00404177	0.0930914
USAS27	0.762908	0.773754	0.816491	0.759382	0.71037	0.711104	0.789081				0.0142175	0.0552322	-0.069944	-0.0645419	0.00103375	0.109656
USAS28	0.828905	0.853575	0.875116	0.874122	0.837076	0.837307	0.877925				0.0297624	0.0252359	-0.0011358	-0.0423811	0.000276038	0.0485113
USAS29	0.844131	0.873066	0.88142	0.858228	0.830295	0.83324	0.886015				0.0342782	0.00956887	-0.0263118	-0.0325471	0.00354579	0.0633371
USAS30	0.900365	0.905485	0.924703	0.911028	0.89392	0.894632	0.929188				0.00568716	0.0212234	-0.0147884	-0.0187782	0.000796265	0.0386253
USAS31	0.72672	-0.0368008	-0.0700319	0.807483	0.773469	0.778648	0.843997				-1.05064	0.903	-12.5302	-0.0421241	0.00669638	0.0839261
USAS32	0.469868	0.45504	0.540019	0.570136	0.492033	0.497325	0.607573				-0.0315575	0.18675	0.0557701	-0.13699	0.0107558	0.221682
USAS33	0.614792	0.277722	0.47706	0.53741	0.469669	0.471175	0.585609				-0.548267	0.71776	0.126505	-0.126051	0.00320684	0.242868
USAS34	0.76419	0.780793	0.823669	0.775779	0.745648	0.755985	0.829419				0.0217257	0.0549132	-0.0581425	-0.0388393	0.0138629	0.0971377
USAS35	0.106902	0.118563	0.144323	-0.0284543	-0.0278541	-0.0262637	-0.0281853				0.109089	0.217265	-1.19716	-0.0210924	-0.057098	0.0731646
BANS1	-0.141625	0.759875	0.384844	0.653397	0.707281	0.568848	0.724153				-6.36539	-0.493543	0.697823	0.0824664	-0.195726	0.273017
BANS2	-0.234562	0.571169	0.179473	0.485835	0.586844	0.454436	0.585873				-3.43504	-0.685779	1.707	0.207907	-0.225628	0.289233
BANS3	-0.366392	0.518068	-0.00953774	0.369134	0.510767	0.331579	0.54582				-2.41397	-1.01841	-39.7025	0.383688	-0.350821	0.646123
BANS4	-0.78624	0.204235	-0.542947	-0.0810998	0.16641	-0.219536	0.208946				-1.25976	-3.65845	-0.85063	-3.05192	-2.31924	-1.95176
BANS5	-0.286316	0.349759	-0.0803425	0.271356	0.38579	0.245134	0.398124				-2.22158	-1.22971	-4.37749	0.42171	-0.364591	0.624103
BANS6	-0.279255	0.195969	-0.112884	0.133129	0.0725624	-0.019756	0.0939809				-1.70176	-1.57603	-2.17935	-0.454947	-1.27226	-5.75708
BANS7	-0.35727	0.180011	-0.193478	0.11447	0.110746	-0.0127956	0.128417				-1.50385	-2.07481	-1.59164	-0.0325318	-1.11554	-11.036
BANS8	-0.0550934	-0.040429	-0.0436438	-0.0360045	-0.00147639	-0.0516223	0.0217411				-0.266173	0.0795178	-0.175038	-0.958994	33.9651	-1.42116
BANS9	-0.291264	0.327963	-0.103369	0.265281	0.508547	0.329294	0.536572				-2.126	-1.31518	-3.56636	0.917011	-0.352481	0.629462
BANS10	-0.330617	0.331531	-0.133918	0.214615	0.650825	0.540453	0.666417				-2.00277	-1.40394	-2.60259	2.03252	-0.169588	0.233072
BANS11	-0.0150088	0.704067	0.413372	0.648126	0.774837	0.714264	0.786241				-47.9101	-0.412879	0.567898	0.195504	-0.0781751	0.100772
BANS12	-0.170262	0.642112	0.300381	0.583879	0.421401	0.258516	0.470703				-4.77133	-0.532199	0.943794	-0.278273	-0.386532	0.820789
BANS13	-0.0945164	-0.0512054	-0.0768264	-0.0524792	-0.027273	-0.0388294	-0.0184801				-0.458238	0.500355	-0.316912	-0.480307	0.423729	-0.524071
BANS14	-0.0995907	-0.0512573	-0.0809755	-0.1342	-0.00196629	-0.253402	-0.244457				-0.48532	0.579784	0.657285	-0.985348	127.873	-0.0353006
BANS15	-0.30451	0.198328	-0.165741	0.124465	0.0168732	-0.033272	0.044748				-1.6513	-1.83569	-1.75096	-0.864434	-2.97188	-2.34492
BANS16	-0.250691	0.431667	0.0207415	0.368383	0.257935	0.0956012	0.310602				-2.72191	-0.95195	16.7606	-0.299819	-0.629359	2.24894
BANS17	-0.524754	0.401982	-0.193156	0.266042	0.437229	0.265464	0.493752				-1.76604	-1.48051	-2.37734	0.643457	-0.392848	0.859958
BANS18	-0.388843	0.499808	-0.0360504	0.449148	0.441508	0.256542	0.496897				-2.28537	-1.07213	-13.4589	-0.0170091	-0.418941	0.936902
BANS19	-0.459508	-0.00676758	-0.332245	-0.135843	0.00874675	-0.180279	0.0557056				-0.985272	48.0937	-0.591136	-1.06439	-21.611	-1.309
BANS20	-0.506744	0.524436	-0.118949	0.37805	0.552354	0.349083	0.604504				-2.03491	-1.22681	-4.17825	0.461061	-0.368008	0.73169
BANS21	-0.247587	0.534593	0.090353	0.455388	0.544143	0.409723	0.572897				-3.15922	-0.830987	4.0401	0.1949	-0.247032	0.398255
BANS22	-0.378001	0.455529	0.00676062	0.339725	0.54003	0.404863	0.580715				-2.2051	-0.985159	49.2506	0.589609	-0.250295	0.434349
BANS23	-0.443242	0.519885	-0.0702733	0.384934	0.447458	0.242034	0.488706				-2.17291	-1.13517	-6.47767	0.162428	-0.45909	1.01916
BANS24	-0.255154	0.0560111	-0.155277	0.00640488	0.0943938	-0.0147668	0.0973864				-1.21952	-3.77225	-1.04125	13.7378	-1.15644	-7.59494
BANS25	-0.268145	-0.267689	-0.189824	-0.105766	-0.0502269	-0.0739548	-0.0379184				-0.0017002	-0.29088	-0.442822	-0.525111	0.472413	-0.487276
BANS26	-0.214725	0.158139	-0.107841	0.12105	0.202179	0.110906	0.230524				-1.73648	-1.68194	-2.12249	0.670207	-0.451449	1.07856
BANS27	-0.686443	-0.325068	-0.283644	-0.505261	-0.0184409	-0.280599	-0.322066				-0.526446	-0.127432	0.781322	-0.963502	14.2161	0.147781
BANS28	-0.416697	0.654655	0.142473	0.536315	0.569401	0.385345	0.609577				-2.57106	-0.782369	2.76432	0.0616912	-0.323246	0.581901
BANS29	-0.496025	0.194509	-0.295068	0.0803005	0.193123	-0.0323053	0.215591				-1.39213	-2.51699	-1.27214	1.405	-1.16728	-7.67355
BANS30	-0.228891	0.361038	-0.053791	0.228787	0.344469	0.198963	0.361617				-2.57734	-1.14899	-5.25325	0.505632	-0.422406	0.817508
BANS31	-0.564529	0.278723	-0.339985	0.0985084	0.228729	-0.00962606	0.287402				-1.49373	-2.21979	-1.28974	1.32193	-1.04208	-30.8567
BANS32	-0.392721	0.379366	-0.144526	0.235488	0.334892	0.149226	0.376798				-1.96599	-1.38097	-2.62938	0.42212	-0.554406	1.52502
BANS33	-0.421763	0.346719	-0.177683	0.215496	0.379473	0.203878	0.421238				-1.82207	-1.51247	-2.21281	0.76093	-0.462734	1.06612
BANS34	-0.363641	0.606934	0.111782	0.485587	0.410811	0.227393	0.44748				-2.66905	-0.815825	3.34405	-0.15399	-0.446479	0.967874
BANS35											#DIV/0!	#DIV/0!	#DIV/0!	#DIV/0!	#DIV/0!	#DIV/0!
MALS1	-0.479197	0.0113434	-0.207283	0.0913354	0.173894	-0.0252989	0.312827				-1.02367	-19.2734	-1.44063	0.903907	-1.14548	-13.3652
MALS2	-0.501387	-0.230161	-0.140877	-0.103654	-0.280544	-0.114504	-0.150119				-0.540952	-0.38792	-0.26422	1.70653	-0.59185	0.311037
MALS3	-0.726906	-0.451727	-0.555166	-0.381319	-0.402828	-0.480434	-0.154197				-0.378562	0.228985	-0.313143	0.0564059	0.192653	-0.679046
MALS4	-0.189141	-0.160665	-0.155186	-0.100589	-0.144648	-0.133892	-0.127072				-0.150553	-0.0341005	-0.35182	0.438017	-0.0743616	-0.0509359
MALS5	-0.0629638	-0.0505645	-0.0506674	-0.0382096	-0.0456447	-0.0394225	-0.0571341				-0.196928	0.00203509	-0.245875	0.194589	-0.136319	0.449276
MALS6	-0.0863619	0.0226203	-0.0525007	-0.171594	-0.0730708	-0.0708656	-0.0636836				-1.26192	-3.32096	2.26841	-0.574165	-0.0301786	-0.101347
MALS7	-0.175982	-0.115187	-0.13824	-0.232052	-0.172997	-0.154424	-0.130939				-0.345464	0.200138	0.678622	-0.254492	-0.107357	-0.152085
MALS8	-0.144408	-0.103185	0.249379	-0.0303772	-0.230454	-0.0087536	0.0311002				-0.285462	-3.41682	-1.12181	6.58642	-0.962016	-4.55284
MALS9	-0.538094	-0.511921	-0.21605	-0.510781	-0.644262	-0.536482	-0.502851				-0.0486391	-0.577964	1.36418	0.261328	-0.167293	-0.0626883
MALS10	-0.569363	-0.785437	-0.317235	-0.617223	-0.169368	-0.272936	-0.530759				0.379502	-0.596103	0.945632	-0.725596	0.611491	0.944631
MALS11	-0.440717	-0.0369799	-0.0156433	-0.3404	-0.0291599	-0.0296873	-0.00993396				-0.916092	-0.576977	20.76	-0.914336	0.0180876	-0.66538
MALS12	-0.60975	-0.43657	-0.532917	-0.694568	-0.650468	-0.659055	-0.630433				-0.284018	0.220692	0.303333	-0.0634926	0.0132002	-0.0434282
MALS13	-0.390358	-0.283888	-0.341117	-0.373699	-0.37678	-0.355622	-0.301851				-0.272748	0.20159	0.095514	0.00824526	-0.0561539	-0.151204
MALS14	-0.870487	-0.761492	-0.844417	-0.899087	-0.856194	-0.879141	-0.851522				-0.125211	0.108898	0.0647429	-0.0477075	0.0268008	-0.0314157
MALS15	-0.017583	0.0968779	0.00539837	-0.213096	-0.232629	-0.168294	-0.13061				-6.50976	-0.944277	-40.474	0.0916632	-0.276553	-0.22392
MALS16	-0.142137	-0.10392	-0.134818	-0.139575	-0.0792048	-0.0710914	-0.0703591				-0.268872	0.29732	0.0352847	-0.432528	-0.102435	-0.0103015
MALS17	-0.532324	-0.221904	-0.352105	-0.464828	-0.396862	-0.363908	-0.327997				-0.583141	0.586747	0.320141	-0.146219	-0.0830364	-0.0986797
MALS18	-0.156588	0.0192358	-0.0528042	-0.272184	-0.178151	-0.188905	-0.171104				-1.12284	-3.74511	4.15458	-0.345476	0.0603637	-0.0942301
MALS19	-0.48323	-0.276135	-0.370313	-0.56714	-0.406387	-0.382936	-0.392146				-0.428563	0.341059	0.531512	-0.283444	-0.0577057	0.0240496
MALS20	-0.454981	-0.297748	-0.412459	-0.637915	-0.548868	-0.544991	-0.515702				-0.345581	0.385261	0.546614	-0.139591	-0.00706464	-0.0537417
MALS21	-0.45063	-0.301263	-0.40906	-0.638007	-0.547414	-0.539837	-0.512856				-0.331462	0.357817	0.55969	-0.141994	-0.0138414	-0.04998
MALS22	-0.2507	-0.115424	-0.0946532	-0.131728	-0.114319	-0.337873	-0.451151				-0.539592	-0.179955	0.391687	-0.132154	1.95552	0.335268
MALS23	-0.396875	-0.199189	-0.279947	-0.450673	-0.318959	-0.302701	-0.290033				-0.498106	0.405433	0.609849	-0.292261	-0.0509701	-0.0418514
MALS24	-0.377237	-0.287347	-0.331796	-0.42197	-0.32068	-0.389657	-0.236894				-0.238284	0.154688	0.271775	-0.240041	0.215095	-0.392046
MALS25	-0.0946666	-0.00561024	-0.0473745	-0.316139	-0.110019	-0.135768	-0.121373				-0.940737	7.44428	5.67319	-0.651993	0.234048	-0.106027
MALS26	-0.329123	-0.150072	-0.213753	-0.371377	-0.139954	-0.181286	-0.201832				-0.544027	0.424341	0.737411	-0.623148	0.295325	0.113334
MALS27	-0.242754	-0.159131	-0.189863	-0.352597	-0.245892	-0.219302	-0.213716				-0.344478	0.193124	0.857117	-0.302627	-0.108137	-0.0254715
MALS28	-0.244116	-0.115775	-0.215731	-0.395654	-0.330994	-0.326521	-0.306565				-0.52574	0.863371	0.834013	-0.163424	-0.013515	-0.0611176
MALS29	-0.326869	-0.117504	-0.123136	-0.186586	-0.170234	-0.156809	-0.150997				-0.640516	0.0479318	0.515281	-0.0876418	-0.0788596	-0.0370648
MALS30	-0.174828	0.0200024	0.00522622	-0.176205	-0.186956	-0.167564	-0.138548				-1.11441	-0.73872	-34.7155	0.0610145	-0.103721	-0.173164
MALS31	0.252121	0.491285	0.48657	-0.053028	-0.0538589	-0.0444145	-0.0272659				0.948605	-0.00959784	-1.10898	0.0156694	-0.175356	-0.386103
MALS32	-0.0663328	0.253271	0.23543	-0.0253228	0.0161962	0.0267843	0.0342968				-4.81819	-0.070442	-1.10756	-1.63959	0.653738	0.280483
MALS33	-0.0452749	-0.100993	-0.0829671	-0.0670276	-0.0319753	-0.031645	-0.0291198				1.23066	-0.178486	-0.192119	-0.522953	-0.0103297	-0.0797959
MALS34	-0.0180381	0.027366	0.0056303	-0.134135	-0.0719328	-0.044069	-0.0494186				-2.51712	-0.79426	-24.8237	-0.463727	-0.387359	0.121391
MALS35		-0.0285714									#DIV/0!	-1	#DIV/0!	#DIV/0!	#DIV/0!	#DIV/0!
PHIS1	0.519459	0.0060219	0.64407	0.563519	0.394264	0.337145	0.543066				-0.988407	105.955	-0.125066	-0.300354	-0.144875	0.610778
PHIS2	-0.27437	-0.2994	-0.340156	-0.324663	0.0337806	-0.0171626	0.0894312				0.0912255	0.136128	-0.0455468	-1.10405	-1.50806	-6.21081
PHIS3	0.0905718	-0.447632	0.378938	0.152797	-0.131548	-0.169667	0.177071				-5.94228	-1.84654	-0.596776	-1.86093	0.289772	-2.04364
PHIS4	-0.184666	-0.165378	-0.167714	-0.140511	-0.141341	-0.0745798	-0.0893167				-0.104445	0.0141258	-0.162201	0.00590715	-0.472341	0.197599
PHIS5	-0.0784256	-0.0681681	-0.0674571	-0.0554259	-0.0555009	-0.0331679	-0.0363637				-0.130793	-0.0104299	-0.178353	0.00135318	-0.40239	0.0963533
PHIS6	-0.270217	-0.266485	-0.282909	-0.265086	-0.328909	-0.28884	-0.202338				-0.0138128	0.0616341	-0.0630014	0.240766	-0.121823	-0.299483
PHIS7	-0.43839	-0.455973	-0.474207	-0.3585	-0.122077	-0.129524	-0.0840657				0.0401068	0.0399894	-0.244	-0.659479	0.0610025	-0.350964
PHIS8	0.0110939	-0.115424	-0.00130964	0.0485071	-0.10463	-0.166691	0.102685				-11.4043	-0.988654	-38.0385	-3.15702	0.593137	-1.61602
PHIS9	-0.575309	-0.642867	-0.670587	-0.642999	-0.477408	-0.325278	-0.262592				0.11743	0.0431197	-0.0411402	-0.25753	-0.318657	-0.192716
PHIS10	-0.41576	-0.435085	-0.444704	-0.362154	-0.197189	-0.0963923	-0.0614157				0.0464813	0.0221081	-0.18563	-0.455512	-0.511167	-0.362857
PHIS11	-0.388814	-0.419205	-0.452015	-0.407786	-0.167529	-0.250846	-0.1568				0.0781631	0.0782687	-0.0978495	-0.589175	0.49733	-0.374914
PHIS12	-0.483347	-0.536279	-0.555284	-0.529537	-0.379591	-0.165862	-0.17376				0.109511	0.0354389	-0.046368	-0.283163	-0.563051	0.0476208
PHIS13	-0.104777	-0.173574	-0.167527	-0.175703	-0.159744	-0.0836432	-0.118834				0.656603	-0.0348366	0.0488051	-0.0908298	-0.476393	0.420732
PHIS14	-0.779013	-0.836262	-0.856465	-0.849838	-0.874738	-0.826424	-0.812441				0.0734893	0.0241586	-0.00773749	0.0293001	-0.0552333	-0.0169192
PHIS15	-0.488081	-0.297135	-0.330928	-0.366627	-0.420819	-0.318033	-0.505487				-0.391218	0.113729	0.107878	0.147812	-0.244252	0.589417
PHIS16	-0.563675	-0.600095	-0.614871	-0.58471	-0.529838	-0.405986	-0.38926				0.0646118	0.0246229	-0.0490526	-0.0938445	-0.233756	-0.0411978
PHIS17	0.0844979	-0.340018	0.00312839	0.121953	-0.0614913	-0.0895885	0.173051				-5.02398	-1.0092	37.9828	-1.50422	0.456929	-2.93162
PHIS18	-0.114808	-0.188993	-0.0772772	-0.165544	-0.189586	-0.18727	-0.146804				0.646162	-0.59111	1.14221	0.145232	-0.0122189	-0.216082
PHIS19	-0.151758	-0.19176	-0.191296	-0.147021	-0.158694	-0.151937	-0.0728968				0.263592	-0.00242102	-0.231448	0.0794021	-0.0425839	-0.520216
PHIS20	0.199258	-0.179126	0.0789477	0.232533	0.0190076	-0.0422016	0.277162				-1.89897	-1.44074	1.94541	-0.918258	-3.22025	-7.56756
PHIS21	0.0171624	-0.151555	-0.179443	0.0387657	0.139501	0.114647	0.423186				-9.8306	0.184017	-1.21603	2.59858	-0.178164	2.6912
PHIS22	-0.294562	-0.213051	-0.0959945	-0.622262	-0.436779	-0.385111	-0.563697				-0.276721	-0.549429	5.48226	-0.298078	-0.118294	0.463727
PHIS23	-0.0163061	-0.289381	-0.0968946	-0.0835562	-0.210665	-0.206779	0.0190294				16.7468	-0.665166	-0.137659	1.52124	-0.0184477	-1.09203
PHIS24	-0.0987082	-0.211638	-0.129971	-0.104407	-0.148004	-0.134127	-0.0687889				1.14407	-0.385879	-0.196694	0.417572	-0.0937609	-0.487135
PHIS25	-0.0990192	-0.168612	-0.107668	-0.0742475	-0.073832	-0.115117	-0.0671187				0.70282	-0.361445	-0.310403	-0.00559626	0.559177	-0.416953
PHIS26	-0.235999	-0.438858	-0.275185	-0.315635	-0.324311	-0.0943128	0.0396065				0.859577	-0.372952	0.146993	0.0274869	-0.70919	-1.41995
PHIS27	-0.147811	-0.387135	-0.090022	-0.069191	-0.234324	-0.240182	-0.0606609				1.61913	-0.767466	-0.231399	2.38663	0.0249979	-0.747437
PHIS28	0.0856494	-0.213965	0.00024931	0.163016	0.15177	0.0445481	0.239024				-3.49815	-1.00117	652.87	-0.0689859	-0.706477	4.36552
PHIS29	0.175662	-0.304155	0.11759	0.00317931	0.0595821	-0.143882	0.0974718				-2.73148	-1.38661	-0.972963	17.7405	-3.41485	-1.67744
PHIS30	-0.109244	-0.546959	0.209589	-0.015032	0.0217884	-0.25547	0.0458153				4.00678	-1.38319	-1.07172	-2.44947	-12.7251	-1.17934
PHIS31	-0.230187	-0.0790638	-0.0782511	-0.083832	-0.0889304	-0.0747578	-0.0539211				-0.656523	-0.0102792	0.0713202	0.0608177	-0.159368	-0.278722
PHIS32	-0.148997	-0.306117	-0.061759	-0.19847	-0.230339	-0.262123	-0.196465				1.05452	-0.79825	2.21362	0.160571	0.13799	-0.250485
PHIS33	-0.122448	-0.130461	-0.121775	-0.125223	-0.129489	-0.115711	-0.0738884				0.0654482	-0.0665822	0.0283157	0.0340661	-0.106403	-0.361441
PHIS34	-0.142185	-0.162216	-0.159509	-0.129019	-0.128795	-0.12572	-0.0754979				0.140879	-0.0166839	-0.191151	-0.00173974	-0.0238695	-0.399477
PHIS35											#DIV/0!	#DIV/0!	#DIV/0!	#DIV/0!	#DIV/0!	#DIV/0!
THAS1	0.668581	0.293761	0.22686	0.414247	0.415263	0.462008	0.342484				-0.56062	-0.22774	0.826	0.00245453	0.112566	-0.258705
THAS2	0.148465	0.0301575	0.105521	0.0841006	0.0714256	0.0926256	0.135609				-0.796872	2.499	-0.202995	-0.150712	0.296811	0.464056
THAS3	0.585212	0.346389	0.489131	0.448674	0.277403	0.335984	0.0700899				-0.408097	0.412085	-0.082712	-0.381728	0.211176	-0.791389
THAS4	-0.160822	-0.0517093	0.124929	0.0742958	-0.146956	-0.249585	-0.20965				-0.678469	-3.41599	-0.405297	-2.97798	0.698369	-0.160008
THAS5	0.0532435	-0.155457	-0.183945	-0.172142	-0.0256622	-0.0252689	-0.13172				-3.91974	0.183251	-0.0641626	-0.850924	-0.0153249	4.2127
THAS6	-0.103755	-0.224118	-0.178886	-0.168547	-0.166442	-0.180127	-0.208351				1.16007	-0.20182	-0.057798	-0.0124902	0.0822233	0.156687
THAS7	0.299244	-0.0360599	0.14654	0.154635	0.134301	0.141551	0.120798				-1.1205	-5.06379	0.0552438	-0.131498	0.0539854	-0.146609
THAS8	-0.11384	-0.313795	-0.152231	-0.191274	-0.22824	-0.162482	-0.0495917				1.75646	-0.514873	0.256478	0.19326	-0.288108	-0.694787
THAS9	0.291826	-0.00341555	-0.636991	-0.621797	-0.588955	-0.58995	-0.574846				-1.0117	185.497	-0.0238527	-0.052818	0.00168937	-0.0256025
THAS10	0.301304	-0.221473	0.143056	0.103576	0.0079949	0.0276829	0.0764349				-1.73505	-1.64593	-0.27597	-0.922812	2.46256	1.76109
THAS11	-0.16223	-0.465886	0.377363	0.402214	0.294656	0.296253	0.0902246				1.87176	-1.80999	0.0658541	-0.267415	0.00542081	-0.695448
THAS12	-0.328034	-0.758437	0.550275	0.543155	0.499078	0.403223	0.468504				1.31207	-1.72554	-0.0129397	-0.0811491	-0.192066	0.1619
THAS13	0.0669463	-0.183019	-0.140563	-0.166866	-0.19533	-0.162109	-0.176389				-3.73382	-0.231975	0.187127	0.170576	-0.170075	0.0880856
THAS14	0.133668	-0.0683338	-0.45947	-0.454129	-0.484219	-0.525867	-0.593449				-1.51122	5.72391	-0.0116245	0.0662579	0.0860111	0.128516
THAS15	0.168919	-0.418374	-0.239522	-0.36492	-0.433809	-0.479268	-0.45543				-3.47678	-0.427492	0.523532	0.188778	0.10479	-0.049738
THAS16	0.0581743	-0.0611973	-0.191162	-0.0256785	-0.179737	-0.115852	-0.176301				-2.05197	2.12369	-0.865671	5.99951	-0.355437	0.521777
THAS17	0.271283	-0.0970252	0.405826	0.309168	0.231385	0.333287	0.189702				-1.35765	-5.18269	-0.238177	-0.251587	0.440399	-0.430815
THAS18	0.0883238	-0.0548825	0.0585687	-0.0223901	-0.0362465	-0.0173399	-0.086385				-1.62138	-2.06716	-1.38229	0.618865	-0.521611	3.98185
THAS19	-0.100354	-0.0983325	0.0422578	0.0283287	-0.00747666	-0.00805357	-0.0383413				-0.0201457	-1.42974	-0.329622	-1.26392	0.077162	3.76078
THAS20	0.210125	-0.555415	0.183557	0.119396	0.065802	0.0807117	0.198116				-3.64327	-1.33049	-0.349544	-0.448876	0.226584	1.45462
THAS21	0.249045	-0.0602104	0.172276	0.0259284	-0.105119	0.0237719	0.103051				-1.24177	-3.86123	-0.849495	-5.05419	-1.22614	3.33498
THAS22	0.373753	0.00201293	0.269471	0.181351	0.116205	0.171212	-0.255332				-0.994614	132.87	-0.327011	-0.359224	0.473351	-2.49133
THAS23	0.139793	0.0177357	0.13335	0.132129	0.00819151	0.0107873	-0.157439				-0.873129	6.51875	-0.00915393	-0.938004	0.316882	-15.5949
THAS24	-0.155769	-0.119659	-0.226629	-0.257533	-0.313916	-0.347619	-0.255089				-0.23182	0.893955	0.136364	0.218935	0.107364	-0.266183
THAS25	0.0459393	-0.280681	-0.128973	-0.088995	-0.0680584	-0.0874042	-0.0734849				-7.10982	-0.540499	-0.309972	-0.235256	0.284253	-0.159252
THAS26	0.0847343	-0.346984	-0.018376	-0.0363779	-0.0638055	-0.0515553	-0.010499				-5.09497	-0.947041	0.979636	0.753964	-0.191992	-0.796354
THAS27	-0.156738	-0.313762	0.203196	0.175244	0.148033	0.193308	0.119587				1.00183	-1.64761	-0.137563	-0.155275	0.305846	-0.381368
THAS28	0.314168	-0.360899	0.234277	0.222629	0.175157	0.184997	0.280489				-2.14874	-1.64915	-0.0497193	-0.213236	0.0561814	0.516178
THAS29	0.0851916	-0.335745	0.0283148	0.00396425	-0.0405266	-0.0293418	0.0281303				-4.94106	-1.08433	-0.859994	-11.223	-0.275988	-1.95871
THAS30	0.453546	-0.00163769	0.288321	0.271355	0.225349	0.262882	0.282076				-1.00361	-177.054	-0.0588442	-0.169543	0.166557	0.0730129
THAS31	-0.0318577	-0.0309711	-0.0421569	-0.0324912	-0.0338101	-0.0307967	-0.0418681				-0.0278295	0.361169	-0.229279	0.0405924	-0.0891258	0.359498
THAS32	-0.0299637	-0.034601	-0.0554491	-0.0902196	-0.0488905	-0.0620294	-0.0965179				0.154766	0.602527	0.627072	-0.458094	0.268741	0.556002
THAS33	0.0225383	-0.108939	0.00969328	0.00212036	-0.00673215	-0.00722141	0.0102566				-5.83351	-1.08898	-0.781254	-4.175	0.0726757	-2.42031
THAS34	0.366065	-0.00993438	0.217542	0.204585	0.154313	0.162928	0.156077				-1.02714	-22.8979	-0.0595637	-0.245728	0.0558278	-0.0420474
THAS35											#DIV/0!	#DIV/0!	#DIV/0!	#DIV/0!	#DIV/0!	#DIV/0!
VIES1	0.498996	0.5028	0.486749	0.438167	0.57759	0.543591	0.474522				0.00762501	-0.0319238	-0.0998097	0.318196	-0.058863	-0.127061
VIES2	-0.34614	-0.364854	-0.328494	-0.42377	-0.358077	-0.38199	-0.395328				0.0540629	-0.0996554	0.290038	-0.15502	0.0667823	0.0349169
VIES3	0.333184	0.340769	0.341187	0.299601	0.399207	0.309543	0.297639				0.0227663	0.00122496	-0.121884	0.332462	-0.224605	-0.0384571
VIES4	-0.691725	-0.670669	-0.664168	-0.622316	-0.618097	-0.555851	-0.575383				-0.0304401	-0.00969334	-0.0630135	-0.00678089	-0.100705	0.0351381
VIES5	-0.325243	-0.295824	-0.292403	-0.361443	-0.245189	-0.213647	-0.274646				-0.0904529	-0.0115638	0.236116	-0.32164	-0.128642	0.285511
VIES6	-0.552509	-0.54225	-0.475966	-0.566351	-0.416034	-0.434836	-0.530019				-0.018567	-0.12224	0.189899	-0.265413	0.0451924	0.218894
VIES7	-0.735763	-0.720352	-0.713433	-0.721687	-0.65821	-0.653423	-0.689981				-0.0209451	-0.00960482	0.0115699	-0.0879576	-0.00727191	0.0559481
VIES8	-0.503661	-0.500126	-0.503688	-0.470572	-0.319256	-0.303824	-0.386483				-0.00701824	0.00712175	-0.0657483	-0.321557	-0.0483386	0.272065
VIES9	-0.450693	-0.435795	-0.446562	-0.426824	-0.385128	-0.399303	-0.435097				-0.0330561	0.0247075	-0.0441994	-0.0976898	0.0368055	0.0896419
VIES10	-0.773574	-0.73719	-0.717916	-0.709322	-0.692395	-0.692917	-0.719021				-0.047033	-0.0261457	-0.0119705	-0.0238643	0.000754011	0.0376725
VIES11	-0.0760894	-0.122824	-0.121358	-0.0802207	0.119735	0.166181	0.0515903				0.614209	-0.0119386	-0.338974	-2.49257	0.387909	-0.689554
VIES12	-0.782044	-0.741164	-0.69038	-0.76015	-0.732228	-0.722953	-0.701005				-0.0522733	-0.0685192	0.101061	-0.036733	-0.0126668	-0.030359
VIES13	-0.10808	-0.101686	-0.100276	-0.116048	-0.11537	-0.0616433	-0.091722				-0.0591569	-0.0138695	0.157288	-0.00584294	-0.46569	0.487947
VIES14	-0.911596	-0.883219	-0.858047	-0.897215	-0.881844	-0.874191	-0.860577				-0.031129	-0.0284999	0.0456481	-0.0171319	-0.00867817	-0.015573
VIES15	-0.311972	-0.372835	-0.365226	-0.330301	-0.405486	-0.354189	-0.427795				0.195093	-0.0204093	-0.0956252	0.227623	-0.126507	0.207816
VIES16	-0.709143	-0.698903	-0.64123	-0.716755	-0.590422	-0.598867	-0.682305				-0.0144399	-0.0825198	0.117782	-0.176257	0.0143026	0.139327
VIES17	-0.542432	-0.516563	-0.532179	-0.588781	-0.553389	-0.542149	-0.549015				-0.0476904	0.0302289	0.106359	-0.0601099	-0.0203106	0.0126635
VIES18	-0.243965	-0.255286	-0.265256	-0.181641	-0.110638	-0.129345	-0.0951908				0.0464014	0.0390562	-0.315224	-0.390899	0.169089	-0.264057
VIES19	-0.355936	-0.341381	-0.375671	-0.367601	-0.248559	-0.221908	-0.298175				-0.0408918	0.100445	-0.0214815	-0.323835	-0.10722	0.343687
VIES20	-0.785975	-0.762956	-0.747187	-0.65581	-0.724506	-0.719311	-0.725088				-0.0292873	-0.0206683	-0.122295	0.104751	-0.00717082	0.00803121
VIES21	-0.489654	-0.489133	-0.544677	-0.477844	-0.374485	-0.391001	-0.514813				-0.00106288	0.113555	-0.122702	-0.216302	0.0441011	0.316654
VIES22	-0.348561	-0.364983	-0.431474	-0.297804	-0.191599	-0.199053	-0.349325				0.0471119	0.182176	-0.309799	-0.356628	0.0389042	0.754937
VIES23	-0.735893	-0.723631	-0.720011	-0.69242	-0.612246	-0.615952	-0.664073				-0.0166622	-0.00500311	-0.0383206	-0.115787	0.00605219	0.0781244
VIES24	-0.555435	-0.547342	-0.556814	-0.461805	-0.391851	-0.390357	-0.477268				-0.0145697	0.0173056	-0.17063	-0.15148	-0.00381405	0.222646
VIES25	-0.263906	-0.267179	-0.29981	-0.210422	-0.16233	-0.154508	-0.24466				0.0124039	0.122129	-0.29815	-0.22855	-0.048184	0.583478
VIES26	-0.427489	-0.415754	-0.438463	-0.423943	-0.299447	-0.281324	-0.372699				-0.0274527	0.0546228	-0.0331153	-0.293662	-0.0605207	0.3248
VIES27	-0.269337	-0.265411	-0.290318	-0.287267	-0.214897	-0.213992	-0.264701				-0.0145773	0.093842	-0.0105079	-0.251928	-0.00421062	0.236968
VIES28	-0.430496	-0.411944	-0.418993	-0.414127	-0.462155	-0.444275	-0.447986				-0.0430943	0.0171105	-0.0116137	0.115974	-0.0386884	0.00835437
VIES29	-0.485857	-0.467756	-0.49337	-0.422801	-0.46344	-0.446484	-0.47758				-0.0372563	0.0547595	-0.143035	0.0961185	-0.0365858	0.0696447
VIES30	-0.608979	-0.604719	-0.621229	-0.563907	-0.438455	-0.449909	-0.550994				-0.00699492	0.0273014	-0.0922718	-0.222469	0.0261246	0.224678
VIES31	-0.0500021	-0.0516536	-0.0624929	-0.0597629	-0.0571059	-0.0427	-0.0551484				0.033029	0.209846	-0.0436849	-0.0444597	-0.252265	0.291532
VIES32	-0.10188	-0.114654	-0.155949	-0.118929	-0.10452	-0.0975458	-0.120505				0.125385	0.360174	-0.237385	-0.121156	-0.066727	0.235365
VIES33	-0.0597981	-0.0538151	-0.0514217	-0.0632855	-0.0745699	-0.0467717	-0.0597312				-0.100053	-0.0444745	0.230716	0.17831	-0.372781	0.27708
VIES34	-0.396476	-0.393766	-0.418606	-0.381447	-0.290877	-0.293449	-0.372784				-0.00683526	0.063083	-0.0887682	-0.237438	0.00884154	0.270353
VIES35	-0.105368	-0.101665	-0.121989	-0.108047	-0.0747662	-0.0591903	-0.10606				-0.0351434	0.199919	-0.11429	-0.308022	-0.208328	0.791854
KAZS1	-0.14979	0.287493	-0.45122	0.147421	-0.375555	-0.497411	-0.611594				-2.91931	-2.5695	-1.32672	-3.54749	0.324469	0.229555
KAZS2	-0.625768	-0.68151	-0.721623	-0.699853	-0.718473	-0.772384	-0.752035				0.0890774	0.0588597	-0.0301687	0.0266056	0.0750363	-0.0263457
KAZS3	-0.30029	-0.0301007	-0.417144	-0.307726	-0.370209	-0.437929	-0.467852				-0.899761	12.8583	-0.262304	0.203048	0.182925	0.068329
KAZS4	-0.123527	-0.111881	-0.129979	-0.107626	-0.0757107	-0.127617	-0.120125				-0.0942732	0.161759	-0.171971	-0.296542	0.685587	-0.058709
KAZS5	-0.0496923	-0.063776	-0.0805791	-0.0533937	-0.0617708	-0.0381267	-0.0488473				0.283418	0.263471	-0.337376	0.156895	-0.382771	0.281183
KAZS6	-0.101931	-0.100149	-0.125456	-0.0997605	-0.0779461	-0.0881559	-0.089976				-0.0174812	0.2527	-0.20482	-0.218668	0.130986	0.020646
KAZS7	-0.252267	-0.197536	-0.211658	-0.145229	-0.211962	-0.182789	-0.165824				-0.216955	0.0714891	-0.313853	0.45951	-0.137636	-0.0928122
KAZS8	-0.35211	-0.437607	-0.411573	-0.357522	-0.417482	-0.439494	-0.417436				0.242811	-0.0594909	-0.131328	0.167709	0.0527268	-0.0501899
KAZS9	-0.424531	-0.469854	-0.492508	-0.483255	-0.428713	-0.529116	-0.550042				0.10676	0.0482151	-0.0187871	-0.112864	0.234197	0.0395481
KAZS10	-0.243719	-0.230041	-0.0425476	-0.0537601	0.0850283	-0.162195	-0.0693019				-0.0561199	-0.815044	0.263527	-2.58162	-2.90754	-0.572725
KAZS11	-0.170075	-0.255356	-0.146679	-0.204269	-0.212098	-0.44363	-0.332359				0.501431	-0.425589	0.392622	0.0383311	1.09162	-0.250818
KAZS12	-0.665363	-0.528253	-0.704733	-0.747936	-0.649453	-0.615057	-0.540497				-0.206069	0.334084	0.0613037	-0.131673	-0.0529624	-0.121225
KAZS13	-0.448377	-0.506118	-0.465387	-0.376186	-0.472492	-0.551315	-0.508055				0.128778	-0.0804788	-0.191669	0.256004	0.166824	-0.0784665
KAZS14	-0.0979427	-0.115706	-0.160836	-0.133421	-0.133344	-0.177718	-0.168641				0.181368	0.390039	-0.170456	-0.000578941	0.33278	-0.0510717
KAZS15	-0.094222	-0.141759	-0.415726	-0.49972	-0.34254	-0.208349	-0.210587				0.504523	1.93263	0.20204	-0.314537	-0.391751	0.0107401
KAZS16	-0.0772673	-0.0778562	-0.102145	-0.119232	-0.103707	-0.0837304	-0.0808704				0.00762178	0.311976	0.167279	-0.130211	-0.192625	-0.0341574
KAZS17	-0.360393	-0.443213	-0.491341	-0.377582	-0.433803	-0.572186	-0.513215				0.229805	0.10859	-0.231527	0.148898	0.319	-0.103063
KAZS18	-0.213205	-0.333687	-0.210278	-0.0688399	-0.122785	-0.180087	-0.08498				0.565099	-0.369832	-0.672625	0.783626	0.466692	-0.528118
KAZS19	-0.286826	-0.335844	-0.340352	-0.317343	-0.307831	-0.354856	-0.310371				0.170901	0.0134221	-0.067605	-0.0299728	0.152763	-0.125362
KAZS20	-0.27366	-0.431207	-0.485148	-0.447918	-0.484358	-0.553474	-0.427289				0.5757	0.125094	-0.0767387	0.0813539	0.142695	-0.227987
KAZS21	-0.437205	-0.454525	-0.477743	-0.390697	-0.49675	-0.625454	-0.575036				0.0396164	0.0510812	-0.182201	0.271445	0.259091	-0.0806109
KAZS22	-0.19949	-0.274404	-0.23031	-0.219661	-0.252196	-0.292875	-0.232784				0.375526	-0.160691	-0.0462371	0.148116	0.161301	-0.205177
KAZS23	-0.38327	-0.507389	-0.543876	-0.505424	-0.586017	-0.647518	-0.587605				0.323843	0.0719117	-0.0707001	0.159458	0.104946	-0.0925268
KAZS24	-0.216186	-0.199923	-0.160897	-0.200446	-0.148819	-0.128644	-0.128668				-0.0752258	-0.195206	0.245801	-0.257559	-0.135567	0.000187199
KAZS25	-0.244478	-0.268953	-0.267167	-0.190252	-0.201234	-0.238037	-0.202405				0.100111	-0.00664235	-0.287889	0.0577211	0.182889	-0.149691
KAZS26	-0.323329	-0.374908	-0.394506	-0.387587	-0.395823	-0.468877	-0.356074				0.159528	0.0522735	-0.017539	0.0212491	0.184564	-0.240583
KAZS27	-0.234041	-0.247262	-0.326419	-0.191429	-0.220941	-0.24854	-0.208915				0.0564886	0.320134	-0.413549	0.154168	0.124914	-0.159428
KAZS28	-0.279525	-0.37891	-0.336434	-0.185605	-0.216844	-0.553156	-0.418507				0.355551	-0.112101	-0.448317	0.168309	1.55094	-0.243419
KAZS29	-0.201535	-0.226107	-0.272132	-0.17615	-0.27188	-0.313375	-0.191625				0.121926	0.203553	-0.352702	0.543452	0.152623	-0.388512
KAZS30	-0.264164	-0.410987	-0.382545	-0.253731	-0.338259	-0.476722	-0.270941				0.555801	-0.0692051	-0.336727	0.333139	0.409338	-0.431659
KAZS31	-0.0450177	-0.0473522	-0.0410306	-0.0308025	-0.0313858	-0.0285714					0.0518561	-0.133501	-0.249279	0.0189367	-0.0896713	-1
KAZS32	-0.0738428	-0.0328296	-0.0528237	0.0700433	0.20153	0.11915	0.106032				-0.555412	0.609027	-2.32598	1.87723	-0.408775	-0.110092
KAZS33	-0.11157	-0.110765	-0.110835	0.0103487	-0.0640448	-0.102868	-0.0929764				-0.00721968	0.000634313	-1.09337	-7.18871	0.606181	-0.0961542
KAZS34	-0.251783	-0.26457	-0.280343	-0.274011	-0.198991	-0.339617	-0.274131				0.050784	0.0596167	-0.022585	-0.273784	0.706691	-0.192822
KAZS35											#DIV/0!	#DIV/0!	#DIV/0!	#DIV/0!	#DIV/0!	#DIV/0!
MONS1	-0.13679	-0.621174	-0.62873	-0.750432	-0.563567	-0.622372	-0.624047				3.54109	0.0121636	0.193567	-0.24901	0.104344	0.00269199
MONS2	-0.992643	-0.983527	-0.980959	-0.981577	-0.982754	-0.982892	-0.986162				-0.00918352	-0.00261145	0.000630235	0.001199	0.000140712	0.00332644
MONS3	-0.471976	-0.540497	-0.446746	-0.426736	-0.490143	-0.562574	-0.589343				0.145177	-0.173453	-0.0447909	0.148587	0.147776	0.047582
MONS4	-0.467314	-0.332919	-0.379439	-0.357001	-0.384712	-0.382364	-0.42572				-0.28759	0.139734	-0.059134	0.0776208	-0.0061032	0.113389
MONS5	-0.305509	-0.242007	-0.258416	-0.239803	-0.262631	-0.256011	-0.28367				-0.207856	0.0678047	-0.0720277	0.0951959	-0.0252098	0.108042
MONS6	-0.581507	-0.486091	-0.465489	-0.508842	-0.519414	-0.542025	-0.502107				-0.164084	-0.0423836	0.0931331	0.0207783	0.0435311	-0.0736461
MONS7	-0.399989	-0.34104	-0.343966	-0.331724	-0.383107	-0.396548	-0.409803				-0.147377	0.00857919	-0.0355909	0.154897	0.0350845	0.0334259
MONS8	-0.518753	-0.584124	-0.376568	-0.38287	-0.360186	-0.317845	-0.245713				0.126016	-0.35533	0.0167365	-0.0592471	-0.117554	-0.226941
MONS9	-0.408353	-0.539564	-0.326387	-0.327939	-0.321547	-0.298143	-0.411567				0.321318	-0.395091	0.00475392	-0.0194913	-0.0727847	0.380435
MONS10	-0.303869	-0.48328	-0.28293	-0.284873	-0.281219	-0.285115	-0.276759				0.590422	-0.414563	0.00686782	-0.0128283	0.0138544	-0.0293052
MONS11	-0.710523	-0.671411	-0.636677	-0.675941	-0.664645	-0.679956	-0.711484				-0.0550468	-0.0517326	0.0616695	-0.0167109	0.0230361	0.0463678
MONS12	-0.649359	-0.578565	-0.587943	-0.701407	-0.656596	-0.663949	-0.780832				-0.109021	0.0162092	0.192985	-0.063887	0.0111975	0.176042
MONS13	-0.51188	-0.471154	-0.406048	-0.418286	-0.402466	-0.400972	-0.46374				-0.0795604	-0.138184	0.0301386	-0.0378205	-0.00371231	0.15654
MONS14	-0.357821	-0.28413	-0.210508	-0.205837	-0.195315	-0.186788	-0.240626				-0.205944	-0.259114	-0.0221915	-0.0511156	-0.0436576	0.288231
MONS15	-0.0775497	-0.0689723	-0.0498535	-0.0518111	-0.0574223	-0.0570181	-0.0648684				-0.110605	-0.277195	0.0392672	0.1083	-0.00703915	0.137681
MONS16	-0.266804	-0.223725	-0.239866	-0.248711	-0.208572	-0.209666	-0.198653				-0.161464	0.0721456	0.0368747	-0.161387	0.00524636	-0.0525277
MONS17	-0.837614	-0.82931	-0.780933	-0.791236	-0.791765	-0.813279	-0.828352				-0.00991289	-0.0583348	0.0131938	0.000668454	0.0271723	0.0185327
MONS18	-0.852426	-0.847123	-0.786472	-0.837917	-0.804808	-0.821675	-0.84252				-0.00622114	-0.071597	0.0654129	-0.0395134	0.0209572	0.0253693
MONS19	-0.544342	-0.567201	-0.464451	-0.496409	-0.531439	-0.599404	-0.609005				0.0419952	-0.181154	0.0688094	0.0705671	0.127888	0.0160181
MONS20	-0.779042	-0.815382	-0.712962	-0.733125	-0.756842	-0.811853	-0.8338				0.0466468	-0.12561	0.02828	0.0323507	0.0726858	0.0270333
MONS21	-0.748703	-0.787797	-0.682562	-0.698763	-0.729208	-0.7849	-0.812378				0.0522157	-0.133582	0.0237354	0.0435696	0.0763738	0.0350085
MONS22	-0.643135	-0.680774	-0.597885	-0.585985	-0.649555	-0.709932	-0.741513				0.0585234	-0.121757	-0.0199027	0.108483	0.0929513	0.0444849
MONS23	-0.900373	-0.879699	-0.852369	-0.845918	-0.85373	-0.88425	-0.894477				-0.0229611	-0.0310678	-0.00756825	0.00923535	0.0357487	0.0115655
MONS24	-0.0614015	-0.0765247	-0.0649864	-0.0597846	-0.0641806	-0.0762299	-0.10048				0.2463	-0.150779	-0.0800448	0.073531	0.18774	0.318119
MONS25	-0.683911	-0.660247	-0.597928	-0.562433	-0.61714	-0.743092	-0.757361				-0.0346011	-0.0943878	-0.0593632	0.0972679	0.204091	0.0192014
MONS26	-0.733305	-0.728805	-0.654862	-0.637986	-0.674399	-0.795224	-0.810387				-0.00613734	-0.101458	-0.0257701	0.0570751	0.179159	0.0190681
MONS27	-0.694025	-0.684971	-0.570822	-0.596858	-0.647977	-0.702766	-0.746063				-0.0130464	-0.166648	0.0456124	0.085646	0.0845539	0.0616095
MONS28	-0.855872	-0.845894	-0.770266	-0.794447	-0.801853	-0.837732	-0.870103				-0.011659	-0.089406	0.031393	0.00932272	0.0447446	0.0386418
MONS29	-0.580609	-0.565881	-0.485306	-0.510384	-0.534062	-0.560665	-0.572176				-0.0253669	-0.142389	0.0516755	0.0463934	0.0498124	0.0205302
MONS30	-0.830199	-0.812897	-0.717874	-0.724528	-0.745773	-0.784439	-0.805748				-0.0208413	-0.116895	0.00926931	0.0293234	0.0518459	0.027165
MONS31	-0.493959	-0.581802	-0.49222	-0.482075	-0.536703	-0.603546	-0.634622				0.177834	-0.153973	-0.0206119	0.113318	0.124545	0.0514895
MONS32	-0.320243	-0.316121	-0.281872	-0.3008	-0.34185	-0.348909	-0.378134				-0.0128692	-0.108341	0.0671514	0.136467	0.0206511	0.0837592
MONS33	-0.343025	-0.392972	-0.366199	-0.377285	-0.404804	-0.431502	-0.432793				0.145608	-0.0681305	0.0302748	0.0729392	0.0659511	0.00299179
MONS34	-0.454198	-0.425397	-0.395553	-0.432283	-0.450248	-0.437855	-0.448598				-0.063412	-0.0701544	0.0928565	0.0415578	-0.0275232	0.0245337
MONS35	-1.60591e-16	-0.0285714	-0.0285714								1.77914e+14	4.12864e-15	-1	#DIV/0!	#DIV/0!	#DIV/0!
SRIS1	0.119762	-0.13422	0.245091	0.66321	0.572563	0.497472	0.733604				-2.12073	-2.82604	1.70597	-0.13668	-0.131149	0.474666
SRIS2	0.399541	0.427861	0.384915	0.303022	0.377624	0.23456	0.37526				0.0708804	-0.100374	-0.212756	0.246193	-0.378853	0.599844
SRIS3	-0.530167	-0.636197	-0.290042	0.344656	0.054804	0.0345171	0.533534				0.199994	-0.5441	-2.18829	-0.840989	-0.370172	14.4571
SRIS4	-0.625125	-0.23758	0.0523663	-0.205974	0.341928	0.277478	0.385164				-0.619947	-1.22042	-4.93333	-2.66006	-0.188491	0.388088
SRIS5	-0.170276	-0.13644	-0.171497	-0.0740741	-0.0646416	-0.0818118	-0.034133				-0.198717	0.256948	-0.568075	-0.127339	0.265623	-0.582786
SRIS6	-0.128053	-0.0852366	-0.0475495	-0.0195279	0.0725916	-0.0207248	0.214391				-0.334365	-0.442147	-0.589315	-4.71733	-1.2855	-11.3446
SRIS7	-0.221407	-0.15006	-0.0194014	0.0499326	0.177295	0.0360975	0.332114				-0.322245	-0.870709	-3.57366	2.55069	-0.796399	8.20046
SRIS8	-0.336829	-0.528458	-0.237666	-0.225375	-0.0682509	-0.132304	-0.469303				0.56892	-0.550265	-0.0517149	-0.697168	0.938491	2.54716
SRIS9	-0.327068	-0.414605	-0.186542	0.315182	0.139492	0.0996793	0.508861				0.267643	-0.550073	-2.68961	-0.557424	-0.285413	4.10498
SRIS10	-0.323641	-0.271391	-0.247854	-0.206895	0.0254745	-0.0579649	-0.180392				-0.161443	-0.0867273	-0.165257	-1.12313	-3.27541	2.1121
SRIS11	0.297184	0.350042	0.393095	0.382548	0.498749	0.382264	0.516935				0.177863	0.122993	-0.0268298	0.303754	-0.233554	0.352298
SRIS12	-0.0881716	-0.026832	0.0570141	0.0837696	0.214851	0.0568509	0.193349				-0.695684	-3.12485	0.469279	1.56479	-0.735394	2.40098
SRIS13	-0.060541	-0.0713009	-0.0644651	-0.0566481	-0.0801862	-0.0943093	-0.0766093				0.17773	-0.0958729	-0.121259	0.415516	0.176129	-0.18768
SRIS14	-0.193636	-0.163756	-0.108674	-0.00552084	-0.0252579	-0.00921915	0.165212				-0.15431	-0.336367	-0.949198	3.57501	-0.635	-18.9206
SRIS15	-0.114334	-0.131873	-0.0984038	-0.094017	-0.0752298	-0.0956277	-0.16506				0.153406	-0.253799	-0.0445803	-0.199827	0.271141	0.726064
SRIS16	-0.202295	-0.156901	0.00638539	0.0280697	0.108577	-0.0114993	0.247142				-0.224392	-1.0407	3.39592	2.86813	-1.10591	-22.4918
SRIS17	-0.2961	-0.313691	-0.158118	0.238868	0.0978571	-0.15364	0.312771				0.0594061	-0.495942	-2.51069	-0.59033	-2.57004	-3.03575
SRIS18	-0.170115	-0.100858	0.165128	0.245136	0.343062	0.235468	0.467123				-0.407116	-2.63722	0.484523	0.399477	-0.313628	0.983802
SRIS19	-0.208097	-0.228884	-0.213422	-0.0883485	-0.167072	-0.192126	-0.0043383				0.0998927	-0.0675531	-0.586039	0.891062	0.149958	-0.97742
SRIS20	-0.0308151	-0.2213	0.0398149	0.423457	0.354271	0.266265	0.59966				6.18154	-1.17991	9.63564	-0.163383	-0.248413	1.25212
SRIS21	-0.209954	-0.13758	-0.117446	0.349866	0.217899	0.126698	0.519731				-0.344711	-0.146343	-3.97895	-0.377194	-0.418544	3.10211
SRIS22	-0.403613	-0.39258	-0.224742	-0.0799074	0.0181493	-0.0607871	0.238307				-0.0273351	-0.427525	-0.644449	-1.22713	-4.34928	-4.92035
SRIS23	-0.28926	-0.130162	0.162479	0.528203	0.412881	0.380776	0.701244				-0.550016	-2.24828	2.2509	-0.218328	-0.0777582	0.841616
SRIS24	-0.147307	-0.144385	-0.0677174	-0.0633279	-0.0664385	-0.0681238	-0.0326256				-0.0198408	-0.530993	-0.064821	0.0491188	0.0253669	-0.521083
SRIS25	-0.750216	-0.608556	-0.460989	0.0331718	0.172733	0.0745105	0.358026				-0.188826	-0.242488	-1.07196	4.20722	-0.568637	3.80504
SRIS26	-0.552796	-0.243009	-0.255605	-0.445876	-0.45547	-0.436214	-0.28274				-0.5604	0.0518311	0.744396	0.0215176	-0.0422777	-0.351833
SRIS27	-0.363233	-0.504511	-0.284119	0.0245023	0.138569	-0.0514153	0.188431				0.388946	-0.436843	-1.08624	4.65536	-1.37104	-4.66489
SRIS28	-0.0921005	0.0801319	0.272093	0.51991	0.52549	0.489366	0.744561				-1.87005	2.39556	0.910784	0.0107334	-0.0687446	0.521482
SRIS29	-0.00267816	0.105397	0.271965	0.394496	0.489668	0.376272	0.63651				-40.3541	1.58039	0.450539	0.24125	-0.231577	0.691622
SRIS30	-0.565179	-0.25773	-0.323679	-0.474323	-0.145097	0.0740553	0.40704				-0.543985	0.255884	0.465413	-0.694098	-1.51039	4.49643
SRIS31	0.162785	0.158898	0.177522	0.0662715	0.0638341	0.0778364	0.148174				-0.0238741	0.117206	-0.626686	-0.0367792	0.219355	0.903661
SRIS32	-0.0922237	-0.0836903	-0.083149	-0.0910666	-0.0504611	-0.0382717	-0.0327341				-0.092529	-0.00646834	0.0952219	-0.445888	-0.24156	-0.144693
SRIS33	-0.221995	-0.196918	-0.0442535	0.0633171	0.170274	0.0397156	0.328829				-0.112962	-0.775269	-2.43078	1.68923	-0.766755	7.27961
SRIS34	-0.238177	-0.15369	0.0757156	0.158726	0.240733	0.212678	0.54265				-0.354725	-1.49265	1.09635	0.516655	-0.116542	1.55151
SRIS35											#DIV/0!	#DIV/0!	#DIV/0!	#DIV/0!	#DIV/0!	#DIV/0!
PAKS1	0.751015	0.731098	0.864956	0.731521	0.793872	0.833692	0.777471				-0.0265203	0.183092	-0.154268	0.0852361	0.0501588	-0.0674368
PAKS2	0.283518	0.276055	0.605571	0.297318	0.386745	0.457537	0.337294				-0.0263207	1.19366	-0.509028	0.300778	0.183045	-0.262804
PAKS3	0.0308932	-0.0539526	0.329325	-0.0480287	0.117326	0.234258	0.136848				-2.74642	-7.10397	-1.14584	-3.44284	0.99663	-0.415825
PAKS4	-0.0542481	-0.241981	0.325746	-0.39121	-0.181098	-0.226093	-0.439146				3.46064	-2.34616	-2.20097	-0.537081	0.248455	0.942324
PAKS5	-0.0386907	-0.145163	-0.218069	-0.216425	-0.0540081	-0.150472	-0.210493				2.75189	0.502234	-0.00753888	-0.750454	1.7861	0.398888
PAKS6	-0.100451	-0.115412	-0.0125026	-0.090883	-0.0632942	-0.0392693	-0.067885				0.14894	-0.891669	6.2691	-0.303564	-0.379575	0.728706
PAKS7	-0.0712416	-0.118761	0.147234	-0.0874297	-0.000441562	0.116759	0.0521896				0.667023	-2.23975	-1.59381	-0.99495	-265.423	-0.553016
PAKS8	0.398209	0.36374	0.596872	0.317588	0.396536	0.421547	0.230161				-0.0865598	0.64093	-0.467913	0.248586	0.0630755	-0.454008
PAKS9	0.387009	0.325103	0.627036	0.28497	0.39662	0.490573	0.340992				-0.159961	0.928729	-0.545528	0.391795	0.236883	-0.304911
PAKS10	-0.085511	-0.103815	0.104742	-0.0864104	-0.0587072	-0.00424483	-0.027625				0.214055	-2.00893	-1.82499	-0.3206	-0.927695	5.50792
PAKS11	0.326227	0.346235	0.452263	0.319159	0.358686	0.411288	0.335352				0.0613301	0.306234	-0.294308	0.123848	0.146653	-0.184629
PAKS12	0.0102842	-0.0441457	0.21202	-0.0599375	0.112794	0.270959	0.201569				-5.29257	-5.80274	-1.2827	-2.88186	1.40225	-0.256091
PAKS13	-0.0332441	-0.0868505	0.0391298	-0.0767359	-0.00293872	0.0828964	-0.00188837				1.61251	-1.45054	-2.96106	-0.961703	-29.2083	-1.02278
PAKS14	-0.0527833	-0.0885289	0.034767	-0.077962	-0.0507017	-0.00590996	-0.0611984				0.677212	-1.39272	-3.24241	-0.349661	-0.883437	9.35512
PAKS15	-0.0516048	-0.0865409	0.0164132	-0.0813004	-0.0429116	0.0527663	-0.0238991				0.676994	-1.18966	-5.95336	-0.472184	-2.22965	-1.45292
PAKS16	0.0919765	-0.0137672	0.404149	0.0243199	0.197072	0.306297	0.134296				-1.14968	-30.356	-0.939824	7.10333	0.554235	-0.561549
PAKS17	0.0938635	-0.0571975	0.426781	-0.083737	0.223566	0.272446	0.22978				-1.60937	-8.46153	-1.19621	-3.66985	0.21864	-0.156602
PAKS18	-0.101208	-0.147757	0.0794377	-0.121996	0.0389877	0.183137	0.0968372				0.459929	-1.53763	-2.53575	-1.31958	3.69729	-0.47123
PAKS19	-0.0920832	-0.147367	0.0925665	-0.146817	-0.0891697	-0.00952124	-0.0918127				0.600366	-1.62814	-2.58607	-0.392647	-0.893223	8.64294
PAKS20	0.258834	0.159416	0.531177	0.15486	0.313696	0.399249	0.290251				-0.384098	2.33202	-0.708458	1.02567	0.272726	-0.273008
PAKS21	0.422041	0.314472	0.6583	0.342416	0.501366	0.586495	0.494791				-0.254879	1.09335	-0.479848	0.464202	0.169795	-0.156359
PAKS22	-0.126556	-0.162208	0.0930117	-0.163044	-0.0920915	-0.060283	-0.0637355				0.281708	-1.57341	-2.75294	-0.435174	-0.345401	0.0572704
PAKS23	0.411173	0.333789	0.589721	0.319866	0.413731	0.411025	0.140102				-0.188203	0.766746	-0.457597	0.293451	-0.00654009	-0.65914
PAKS24	-0.0547955	-0.0501626	-0.0384779	-0.0682136	-0.0643486	-0.0460992	-0.0552937				-0.0845492	-0.232936	0.772799	-0.05666	-0.283602	0.19945
PAKS25	-0.135761	-0.152724	0.0380708	-0.174946	-0.0813943	0.0699719	0.107181				0.124947	-1.24928	-5.59529	-0.534747	-1.85967	0.531768
PAKS26	0.298086	0.230545	0.487099	0.229475	0.301643	0.307524	0.0625053				-0.226581	1.11282	-0.528894	0.31449	0.019497	-0.796747
PAKS27	0.193734	0.120639	0.369961	0.140115	0.235192	0.255814	0.113741				-0.377298	2.06668	-0.621271	0.678566	0.0876817	-0.555376
PAKS28	0.152568	0.0941079	0.47536	0.229071	0.2215	0.386872	0.410452				-0.383173	4.05122	-0.51811	-0.0330493	0.746596	0.0609517
PAKS29	0.372341	0.314127	0.610907	0.368011	0.45124	0.507695	0.375353				-0.156345	0.944775	-0.397599	0.226158	0.125111	-0.260673
PAKS30	0.45528	0.412826	0.649051	0.463522	0.444662	0.461619	0.3793				-0.0932487	0.572216	-0.285846	-0.0406881	0.0381344	-0.178326
PAKS31	-0.0474547	-0.0590424	-0.036151	-0.0467821	-0.0576585	-0.0448236	-0.0597264				0.244186	-0.387711	0.294073	0.232492	-0.222602	0.332476
PAKS32	-0.0656709	-0.100786	0.133426	-0.0745876	0.0592751	0.118158	0.0180445				0.534714	-2.32386	-1.55902	-1.7947	0.99338	-0.847285
PAKS33	-0.0710143	-0.102234	0.0869274	-0.0760864	0.0215993	0.0750941	-0.00640141				0.43963	-1.85028	-1.87529	-1.28388	2.47669	-1.08525
PAKS34	0.127203	0.124872	0.375514	0.127077	0.151495	0.154653	0.0666423				-0.0183253	2.0072	-0.661593	0.192155	0.0208438	-0.569085
PAKS35											#DIV/0!	#DIV/0!	#DIV/0!	#DIV/0!	#DIV/0!	#DIV/0!
FIJS1	-0.743979	-0.584858	-0.369104	-0.0822197	-0.475884	-0.673022	-0.697324				-0.213879	-0.368899	-0.777245	4.78795	0.414258	0.0361087
FIJS2	-0.342498	-0.47051	-0.679319	-0.749428	-0.767173	-0.603689	-0.644416				0.37376	0.443792	0.103205	0.0236775	-0.213099	0.0674633
FIJS3	-0.883563	-0.663196	-0.453257	-0.442595	-0.523017	-0.559026	-0.558003				-0.249408	-0.316556	-0.0235227	0.181705	0.0688477	-0.00182913
FIJS4	-0.321885	-0.133247	-0.0887046	-0.230704	-0.0778469	-0.16411	-0.159762				-0.586042	-0.334283	1.60081	-0.662568	1.10811	-0.0264956
FIJS5	-0.166186	-0.137843	-0.111691	-0.118538	-0.0688304	-0.105773	-0.118129				-0.170552	-0.189724	0.0613006	-0.419337	0.536714	0.116816
FIJS6	-0.599637	-0.80317	-0.810964	-0.799996	-0.656557	-0.627727	-0.605821				0.339427	0.00970415	-0.0135246	-0.1793	-0.043912	-0.0348971
FIJS7	-0.302228	-0.191748	-0.126941	-0.0876464	-0.166634	-0.253795	-0.253529				-0.365551	-0.337981	-0.30955	0.901205	0.523072	-0.00104958
FIJS8											#DIV/0!	#DIV/0!	#DIV/0!	#DIV/0!	#DIV/0!	#DIV/0!
FIJS9	-0.449242	-0.481907	-0.453998	-0.408192	-0.45655	-0.46687	-0.496801				0.0727102	-0.0579131	-0.100894	0.118467	0.0226044	0.064111
FIJS10	-0.464399	-0.474807	-0.387414	-0.371699	-0.323917	-0.434981	-0.446587				0.0224117	-0.184061	-0.0405641	-0.128549	0.34288	0.0266796
FIJS11	-0.679411	-0.561594	-0.432664	-0.433877	-0.464207	-0.473865	-0.497542				-0.173411	-0.229578	0.00280325	0.0699051	0.0208048	0.0499651
FIJS12	-0.161556	-0.671765	-0.560493	-0.332501	-0.38705	-0.646493	-0.645802				3.15809	-0.165642	-0.40677	0.164057	0.670309	-0.00107019
FIJS13	-0.215101	-0.206026	-0.223426	-0.165114	-0.183312	-0.198182	-0.215097				-0.0421904	0.0844571	-0.26099	0.11021	0.0811213	0.0853507
FIJS14											#DIV/0!	#DIV/0!	#DIV/0!	#DIV/0!	#DIV/0!	#DIV/0!
FIJS15	-0.142235	-0.154905	-0.157586	-0.114596	-0.126661	-0.109653	-0.117593				0.0890826	0.0173077	-0.272807	0.105285	-0.134278	0.0724053
FIJS16	-0.401609	-0.388732	-0.388185	-0.289602	-0.325944	-0.339787	-0.361631				-0.0320656	-0.00140514	-0.253958	0.125487	0.0424727	0.0642872
FIJS17	-0.531041	-0.535629	-0.401752	-0.276239	-0.36585	-0.480839	-0.508174				0.00864042	-0.249944	-0.312413	0.324395	0.314307	0.0568487
FIJS18	-0.440177	-0.661823	-0.672178	-0.279366	-0.551345	-0.794192	-0.786585				0.503537	0.0156469	-0.584387	0.97356	0.440462	-0.00957873
FIJS19	-0.279496	-0.480892	-0.677627	-0.485464	-0.446154	-0.460805	-0.487231				0.720572	0.409103	-0.283582	-0.0809746	0.032838	0.0573471
FIJS20	-0.756049	-0.561652	-0.551743	-0.390396	-0.327508	-0.400217	-0.413041				-0.257122	-0.0176431	-0.292431	-0.161089	0.222009	0.0320418
FIJS21	-0.48579	-0.647533	-0.713762	-0.35122	-0.729988	-0.712708	-0.560268				0.332948	0.10228	-0.507931	1.07843	-0.0236719	-0.213888
FIJS22	-0.777454	-0.834273	-0.698882	-0.540396	-0.487971	-0.618097	-0.698243				0.0730834	-0.162287	-0.226771	-0.0970111	0.266667	0.129666
FIJS23	-0.279752	-0.396443	-0.473053	-0.0856259	-0.216176	-0.272401	-0.294073				0.417125	0.193245	-0.818993	1.52465	0.260093	0.0795596
FIJS24	-0.629602	-0.654372	-0.471963	-0.34915	-0.365371	-0.386195	-0.275907				0.0393422	-0.278754	-0.260217	0.046457	0.056995	-0.285576
FIJS25	-0.767534	-0.801885	-0.795665	-0.465119	-0.454196	-0.727632	-0.742848				0.044755	-0.00775716	-0.415433	-0.0234843	0.602022	0.0209114
FIJS26	-0.773577	-0.828158	-0.863699	-0.914073	-0.927331	-0.868341	-0.614283				0.0705569	0.0429153	0.0583239	0.0145037	-0.0636121	-0.292579
FIJS27	-0.485571	-0.485028	-0.330603	-0.169835	-0.245829	-0.42938	-0.461381				-0.00111895	-0.318383	-0.486286	0.447451	0.746665	0.0745289
FIJS28	-0.382781	-0.260305	-0.101029	0.0784503	-0.0205015	-0.25407	-0.215187				-0.319965	-0.611881	-1.77651	-1.26133	11.3928	-0.153042
FIJS29	-0.606798	-0.53142	-0.385446	-0.259366	-0.356795	-0.544021	-0.572567				-0.124223	-0.274687	-0.327102	0.375646	0.524741	0.0524737
FIJS30	-0.297997	-0.579872	-0.63189	-0.0568553	-0.175936	-0.574176	-0.571742				0.945896	0.0897058	-0.910023	2.09445	2.26355	-0.004239
FIJS31	-0.162738	-0.283886	-0.258673	-0.173068	-0.183875	-0.190478	-0.154078				0.744437	-0.0888109	-0.330939	0.0624439	0.0359108	-0.1911
FIJS32	-0.217158	-0.357482	-0.367583	-0.228621	-0.243572	-0.351621	-0.33592				0.646182	0.0282539	-0.378042	0.0653952	0.443605	-0.0446529
FIJS33	-0.280281	-0.495007	-0.480239	-0.278168	-0.322136	-0.557448	-0.431824				0.766111	-0.029833	-0.420773	0.158063	0.730476	-0.225356
FIJS34	-0.617339	-0.674799	-0.457191	-0.276205	-0.30397	-0.377388	-0.436782				0.0930768	-0.322478	-0.395865	0.100523	0.241532	0.157381
FIJS35											#DIV/0!	#DIV/0!	#DIV/0!	#DIV/0!	#DIV/0!	#DIV/0!
LAOS1	-0.485157	-0.409088	-0.845446	-0.631707	-0.778656	-0.741309	-0.771836				-0.156793	1.06666	-0.252812	0.232622	-0.0479639	0.0411803
LAOS2	-0.834491	-0.83092	-0.876006	-0.90359	-0.885981	-0.891518	-0.885342				-0.00427915	0.0542605	0.0314878	-0.0194877	0.0062503	-0.00692833
LAOS3	-0.31451	-0.281001	-0.470322	-0.532764	-0.600562	-0.518578	-0.533925				-0.106543	0.673737	0.132763	0.127257	-0.136512	0.0295954
LAOS4	-0.0582388	-0.0396159	-0.269127	-0.157488	-0.17029	-0.273394	-0.240904				-0.319769	5.79342	-0.41482	0.0812906	0.605459	-0.118839
LAOS5	-0.00215886	0.0119865	-0.167814	-0.0946494	-0.109697	-0.177243	-0.150375				-6.55224	-15.0003	-0.435987	0.158982	0.61575	-0.151586
LAOS6	-0.662787	-0.522846	-0.722904	-0.5388	-0.600586	-0.668808	-0.694755				-0.21114	0.382633	-0.254673	0.114674	0.113593	0.0387951
LAOS7	-0.148536	-0.771949	-0.797575	-0.838371	-0.780099	-0.793615	-0.837119				4.19704	0.0331973	0.0511497	-0.0695069	0.017326	0.0548185
LAOS8	-0.285593	-0.226894	-0.157595	-0.0888637	-0.286425	-0.361189	-0.451149				-0.205532	-0.305424	-0.436127	2.22319	0.261025	0.249067
LAOS9	-0.235495	-0.215817	-0.18058	-0.151619	-0.293045	-0.35057	-0.393318				-0.0835596	-0.163272	-0.160379	0.932774	0.196299	0.121939
LAOS10	-0.142925	-0.166301	-0.175172	-0.182552	-0.261802	-0.242943	-0.250406				0.163552	0.0533408	0.042131	0.434123	-0.072036	0.0307206
LAOS11	0.237367	-0.0399155	0.212127	0.3003	0.0463655	-0.218498	-0.391245				-1.16816	-6.31441	0.415663	-0.845603	-5.71252	0.790611
LAOS12	-0.159251	-0.248622	-0.162236	-0.100511	-0.277332	-0.378189	-0.450774				0.561195	-0.34746	-0.380465	1.75923	0.363668	0.191926
LAOS13	-0.0457201	-0.0507719	-0.0497785	-0.0577549	-0.0629153	-0.0599047	-0.0560253				0.110494	-0.019566	0.160237	0.08935	-0.0478504	-0.0647608
LAOS14	-0.115806	-0.144809	-0.146178	-0.170429	-0.232854	-0.213114	-0.217154				0.250439	0.00945882	0.165899	0.366278	-0.0847747	0.0189581
LAOS15	-0.0910107	-0.111163	-0.115639	-0.139743	-0.17959	-0.173263	-0.172437				0.221426	0.040267	0.20844	0.285148	-0.035232	-0.00476589
LAOS16	-0.288956	-0.32321	-0.281715	-0.263999	-0.509386	-0.534258	-0.591273				0.118543	-0.128382	-0.0628865	0.929496	0.0488272	0.106719
LAOS17	-0.789879	-0.831987	-0.825319	-0.624632	-0.862508	-0.838189	-0.877479				0.0533101	-0.00801475	-0.243163	0.380826	-0.0281959	0.0468744
LAOS18	-0.0585842	-0.181516	-0.158078	-0.125351	-0.296973	-0.464355	-0.578259				2.09839	-0.129124	-0.207035	1.36914	0.563631	0.245295
LAOS19	-0.257295	-0.188552	-0.253613	-0.175922	-0.272764	-0.356719	-0.420658				-0.267174	0.345054	-0.306338	0.550485	0.307795	0.17924
LAOS20	-0.226991	-0.173416	-0.263168	-0.187344	-0.289237	-0.33095	-0.422412				-0.236024	0.517555	-0.288119	0.54388	0.144218	0.276361
LAOS21	-0.141883	0.0539092	-0.132326	-0.0241189	-0.199106	-0.209234	-0.369254				-1.37995	-3.45461	-0.817731	7.25519	0.0508678	0.764786
LAOS22	-0.129938	-0.113214	-0.16851	-0.17408	-0.206911	-0.203511	-0.237902				-0.128703	0.488416	0.0330513	0.188601	-0.016434	0.168987
LAOS23	-0.0411114	-0.161641	-0.0283637	0.128438	-0.162129	-0.368843	-0.46695				2.93179	-0.824527	-5.52823	-2.26232	1.27499	0.265984
LAOS24	-0.187326	-0.24744	-0.170174	-0.157176	-0.293026	-0.345168	-0.389804				0.320904	-0.312259	-0.0763807	0.864312	0.177943	0.129317
LAOS25	-0.162465	-0.244475	-0.174517	-0.182527	-0.265973	-0.276936	-0.297978				0.504782	-0.286154	0.0458925	0.457172	0.0412186	0.0759827
LAOS26	-0.160517	-0.227713	-0.181911	-0.181493	-0.276273	-0.293631	-0.316163				0.418619	-0.201141	-0.00229518	0.522222	0.0628296	0.0767353
LAOS27	-0.176271	-0.146999	-0.125978	-0.0991599	-0.14149	-0.0624193	-0.115135				-0.166064	-0.142999	-0.212879	0.426883	-0.558842	0.844543
LAOS28	-0.166412	-0.0845489	-0.21643	-0.149209	-0.252452	-0.312251	-0.389777				-0.49193	1.55982	-0.310591	0.69194	0.23687	0.248283
LAOS29	-0.191522	-0.105278	-0.216684	-0.196429	-0.270871	-0.216325	-0.284242				-0.450311	1.05822	-0.0934762	0.378975	-0.201375	0.313963
LAOS30	-0.178109	-0.121089	-0.227175	-0.151508	-0.245131	-0.324885	-0.409826				-0.320138	0.876093	-0.333079	0.617944	0.325351	0.261449
LAOS31	0.0243395	0.0150421	0.0192936	-0.0520638	-0.070799	-0.0540111	-0.0709986				-0.381989	0.282641	-3.6985	0.359851	-0.237121	0.314517
LAOS32	0.032264	-0.00765242	-0.0430952	-0.021108	-0.038503	0.0264226	-0.00167817				-1.23718	4.63157	-0.5102	0.824092	-1.68625	-1.06351
LAOS33	-0.0286471	-0.0285971	-0.0312274	-0.032345	-0.0355459	-0.030254	-0.031118				-0.00174578	0.0919789	0.0357885	0.0989587	-0.148875	0.0285586
LAOS34	-0.0538666	-0.0791202	-0.0891844	0.0393072	0.0311304	0.0483038	0.0401929				0.468817	0.127201	-1.44074	-0.208025	0.551662	-0.167915
LAOS35											#DIV/0!	#DIV/0!	#DIV/0!	#DIV/0!	#DIV/0!	#DIV/0!
BRUS1	-0.15408	-0.200003	0.143157	-0.300355	-0.296301	-0.30219	-0.276866				0.298045	-1.71577	-3.09809	-0.0134973	0.0198756	-0.0838031
BRUS2	-0.90274	-0.870211	-0.89516	-0.900068	-0.967759	-0.939543	-0.939644				-0.0360338	0.0286709	0.00548193	0.0752072	-0.0291559	0.000106758
BRUS3	-0.298029	-0.322541	-0.333335	-0.355182	-0.368199	-0.388484	-0.387162				0.0822459	0.0334647	0.0655405	0.0366492	0.055093	-0.003403
BRUS4	-0.25518	-0.235251	-0.213229	-0.279049	-0.256928	-0.17467	-0.183689				-0.0780978	-0.0936074	0.30868	-0.079274	-0.320157	0.0516303
BRUS5											#DIV/0!	#DIV/0!	#DIV/0!	#DIV/0!	#DIV/0!	#DIV/0!
BRUS6	-0.243677	-0.264392	-0.221174	-0.171471	-0.206203	-0.170781	-0.177315				0.0850102	-0.163464	-0.224724	0.202557	-0.171785	0.0382634
BRUS7	-0.339741	-0.360557	-0.30906	-0.212794	-0.225298	-0.24173	-0.251761				0.0612684	-0.142825	-0.311481	0.0587619	0.0729337	0.0414962
BRUS8	-0.851138	-0.937001	-0.84437	-0.815992	-0.839229	-0.882013	-0.907659				0.10088	-0.098859	-0.0336089	0.0284771	0.0509806	0.0290761
BRUS9	-0.579426	-0.621946	-0.62287	-0.649313	-0.684991	-0.638138	-0.637				0.0733828	0.00148533	0.0424542	0.0549474	-0.0684	-0.00178282
BRUS10	-0.150122	-0.152507	-0.155099	-0.118617	-0.151456	-0.135038	-0.140263				0.0158869	0.0169958	-0.235218	0.276851	-0.108405	0.0386977
BRUS11	-0.429371	-0.445426	-0.442134	-0.348365	-0.405892	-0.405076	-0.402194				0.037392	-0.00739179	-0.212084	0.165136	-0.00200934	-0.00711472
BRUS12	-0.44375	-0.473723	-0.401336	-0.277085	-0.302815	-0.327106	-0.335421				0.0675456	-0.152805	-0.309594	0.0928616	0.0802174	0.0254181
BRUS13	-0.0713804	-0.0711186	-0.0695934	-0.0625801	-0.0658034	-0.063037	-0.0604451				-0.00366825	-0.0214453	-0.100775	0.0515069	-0.0420412	-0.0411161
BRUS14	-0.249612	-0.26934	-0.285445	-0.153257	-0.253215	-0.20545	-0.180923				0.0790335	0.0597935	-0.463096	0.652227	-0.188632	-0.119382
BRUS15	-0.187671	-0.192275	-0.181844	-0.149493	-0.0886881	-0.0912086	-0.0963976				0.0245327	-0.05425	-0.177904	-0.406741	0.0284199	0.0568915
BRUS16	-0.448378	-0.456048	-0.405443	-0.280042	-0.305966	-0.330554	-0.340952				0.0171067	-0.110964	-0.309295	0.0925721	0.0803617	0.0314559
BRUS17	-0.597258	-0.6356	-0.606006	-0.674935	-0.437442	-0.422586	-0.410155				0.0641957	-0.0465608	0.113743	-0.351875	-0.0339607	-0.0294165
BRUS18	-0.548182	-0.566021	-0.488195	-0.347117	-0.354269	-0.383897	-0.387986				0.0325427	-0.137497	-0.288978	0.0206014	0.0836339	0.0106501
BRUS19	-0.53043	-0.541786	-0.50283	-0.3655	-0.38754	-0.415183	-0.410535				0.0214101	-0.0719028	-0.273114	0.0602995	0.0713305	-0.0111949
BRUS20	-0.717579	-0.731827	-0.664589	-0.513975	-0.553036	-0.58112	-0.579168				0.0198558	-0.0918769	-0.226627	0.0759981	0.0507819	-0.00335967
BRUS21	-0.66777	-0.662233	-0.637638	-0.486035	-0.521602	-0.551334	-0.548809				-0.00829043	-0.0371401	-0.237758	0.0731785	0.0570016	-0.00458071
BRUS22	-0.710304	-0.727573	-0.689375	-0.690636	-0.576887	-0.59288	-0.593016				0.0243126	-0.0525016	0.00183027	-0.164703	0.0277242	0.000228212
BRUS23	-0.310211	-0.322312	-0.264773	-0.207774	-0.187448	-0.189115	-0.1894				0.039007	-0.17852	-0.215272	-0.0978318	0.00889386	0.00150739
BRUS24	-0.731941	-0.733304	-0.631823	-0.602316	-0.666441	-0.61228	-0.39776				0.00186174	-0.138388	-0.0467009	0.106464	-0.0812699	-0.350363
BRUS25	-0.564768	-0.590375	-0.451821	-0.402459	-0.277627	-0.433984	-0.506495				0.0453413	-0.234689	-0.109251	-0.310173	0.56319	0.167081
BRUS26	-0.658439	-0.684905	-0.608036	-0.604536	-0.523872	-0.531926	-0.374678				0.040195	-0.112233	-0.0057561	-0.133432	0.0153742	-0.29562
BRUS27	-0.771908	-0.782704	-0.763293	-0.692653	-0.651609	-0.653408	-0.649247				0.0139859	-0.0248003	-0.0925458	-0.0592561	0.00276143	-0.00636839
BRUS28	-0.816617	-0.81649	-0.794425	-0.709634	-0.674417	-0.672287	-0.703891				-0.000154877	-0.0270246	-0.106732	-0.0496268	-0.00315894	0.0470103
BRUS29	-0.349259	-0.347088	-0.250119	-0.321305	-0.222728	-0.240778	-0.244226				-0.00621881	-0.279378	0.284608	-0.306802	0.0810421	0.0143194
BRUS30	-0.802777	-0.813878	-0.806061	-0.736293	-0.744611	-0.733834	-0.735828				0.013829	-0.00960479	-0.0865541	0.0112972	-0.0144742	0.00271786
BRUS31	-0.484687	-0.504982	-0.354568	-0.462909	-0.354186	-0.418801	-0.455615				0.0418725	-0.29786	0.305558	-0.234869	0.182432	0.0879032
BRUS32	-0.36632	-0.413858	-0.234618	-0.35502	-0.204955	-0.280495	-0.328195				0.129772	-0.433095	0.513182	-0.422695	0.368569	0.170056
BRUS33	-0.444622	-0.475332	-0.405184	-0.498445	-0.221496	-0.287552	-0.331348				0.0690691	-0.147577	0.23017	-0.555626	0.298225	0.152308
BRUS34	-0.478412	-0.504421	-0.414192	-0.477241	-0.323369	-0.311746	-0.334917				0.0543638	-0.178875	0.152221	-0.322421	-0.0359419	0.0743274
BRUS35											#DIV/0!	#DIV/0!	#DIV/0!	#DIV/0!	#DIV/0!	#DIV/0!
BHUS1	-0.553526	-0.23451	-0.218093	-0.474726	-0.193641	-0.148691	-0.432397				-0.576335	-0.0700041	1.17671	-0.5921	-0.232129	1.90802
BHUS2	-0.887184	-0.790208	-0.832899	-0.666592	-0.751095	-0.663029	-0.645829				-0.109307	0.0540243	-0.199672	0.126768	-0.11725	-0.0259408
BHUS3	-0.321855	-0.252677	-0.186689	-0.187603	-0.250824	-0.228147	-0.280047				-0.214936	-0.261156	0.00489793	0.336994	-0.0904113	0.227484
BHUS4	-0.163457	-0.180988	-0.123337	-0.189719	-0.0714189	-0.108416	-0.140825				0.107249	-0.318535	0.538216	-0.623554	0.51803	0.298929
BHUS5	-0.0946988	-0.0979027	-0.0873394	-0.106287	-0.130712	-0.118941	-0.123393				0.0338323	-0.107896	0.21694	0.229809	-0.090056	0.037431
BHUS6	-0.187828	-0.233679	-0.237118	-0.198871	-0.1312	-0.150356	-0.136869				0.244115	0.0147188	-0.161299	-0.340278	0.146004	-0.0896982
BHUS7	-0.315449	-0.374938	-0.36233	-0.293362	-0.171445	-0.182885	-0.247461				0.188585	-0.0336261	-0.190345	-0.415587	0.066731	0.353096
BHUS8											#DIV/0!	#DIV/0!	#DIV/0!	#DIV/0!	#DIV/0!	#DIV/0!
BHUS9	-0.485397	-0.592744	-0.538871	-0.405869	-0.350707	-0.317512	-0.20935				0.221152	-0.0908866	-0.246816	-0.13591	-0.0946514	-0.340656
BHUS10	-0.430514	-0.414746	-0.324325	-0.37212	-0.314045	-0.306457	-0.16643				-0.0366244	-0.218016	0.147366	-0.156064	-0.0241611	-0.456924
BHUS11	-0.504326	-0.738694	-0.638125	-0.758499	-0.558084	-0.532254	-0.461594				0.464714	-0.136145	0.188637	-0.264225	-0.0462849	-0.132755
BHUS12	-0.65376	-0.814157	-0.786967	-0.820475	-0.8592	-0.862635	-0.868955				0.245345	-0.0333955	0.0425778	0.0471991	0.00399684	0.00732707
BHUS13	-0.247135	-0.215945	-0.238516	-0.276849	-0.129169	-0.142993	-0.152574				-0.126208	0.104524	0.160712	-0.53343	0.107023	0.0670011
BHUS14	-0.164527	-0.176054	-0.160515	-0.13741	-0.126469	-0.11281	-0.124286				0.0700576	-0.0882621	-0.143939	-0.0796252	-0.108002	0.101722
BHUS15	-0.0755601	-0.0756961	-0.0715637	-0.0627491	-0.0573623	-0.0666359	-0.0571434				0.0017998	-0.0545911	-0.123172	-0.085846	0.161667	-0.142454
BHUS16	-0.463605	-0.575276	-0.52665	-0.38987	-0.351784	-0.324252	-0.152604				0.240875	-0.0845271	-0.259716	-0.0976892	-0.0782637	-0.529366
BHUS17	-0.633769	-0.780032	-0.662499	-0.485114	-0.82098	-0.810877	-0.797227				0.230782	-0.150677	-0.267752	0.692344	-0.0123054	-0.0168342
BHUS18	-0.630652	-0.423301	-0.357995	-0.563718	-0.403129	-0.42131	-0.268543				-0.328787	-0.154278	0.57465	-0.284875	0.0451001	-0.362598
BHUS19	-0.351904	-0.316821	-0.299733	-0.321654	-0.305772	-0.298194	-0.270871				-0.0996947	-0.0539369	0.0731362	-0.049376	-0.0247821	-0.0916311
BHUS20	-0.557865	-0.430822	-0.39911	-0.502418	-0.368865	-0.356097	-0.215979				-0.227731	-0.0736075	0.258846	-0.26582	-0.034615	-0.393481
BHUS21	-0.574974	-0.433567	-0.42769	-0.49447	-0.337797	-0.325006	-0.139646				-0.245936	-0.013556	0.156142	-0.316851	-0.0378664	-0.570328
BHUS22	-0.369113	-0.501294	-0.416788	-0.373957	-0.249338	-0.251375	-0.185295				0.358106	-0.168575	-0.102767	-0.333245	0.00816986	-0.262875
BHUS23	-0.456444	-0.46573	-0.17889	-0.443934	-0.27179	-0.0601787	0.202604				0.0203447	-0.615894	1.4816	-0.387769	-0.778584	-4.36671
BHUS24	-0.127293	-0.133809	-0.0870401	-0.0929239	-0.109204	-0.113242	-0.0908927				0.0511921	-0.349521	0.0675999	0.1752	0.036973	-0.197358
BHUS25	-0.495919	-0.479787	-0.441728	-0.581189	-0.371059	-0.339581	-0.356754				-0.0325295	-0.0793247	0.315716	-0.361551	-0.0848327	0.0505705
BHUS26	-0.279373	-0.269263	-0.246896	-0.213431	-0.227467	-0.227609	-0.206309				-0.0361912	-0.0830666	-0.135542	0.0657612	0.000625782	-0.0935814
BHUS27	-0.448064	-0.415173	-0.451081	-0.530068	-0.463049	-0.488214	-0.440764				-0.0734069	0.0864886	0.175105	-0.126434	0.054347	-0.097192
BHUS28	-0.426477	-0.444353	-0.207376	-0.415937	-0.196566	-0.252481	-0.0534592				0.0419151	-0.533308	1.00572	-0.527415	0.284461	-0.788264
BHUS29	-0.32518	-0.394382	-0.340024	-0.276156	-0.310654	-0.144417	0.0305779				0.212809	-0.137831	-0.187834	0.124925	-0.53512	-1.21173
BHUS30	-0.470053	-0.387203	-0.39173	-0.322839	-0.457434	-0.403513	-0.364025				-0.176256	0.01169	-0.175862	0.41691	-0.117877	-0.0978604
BHUS31	-0.347013	-0.278059	-0.211111	-0.454962	-0.369359	-0.296489	-0.291672				-0.198705	-0.24077	1.15509	-0.188154	-0.197289	-0.0162479
BHUS32	-0.215171	-0.166961	-0.0734262	-0.306561	-0.210551	-0.193862	-0.200907				-0.224056	-0.560218	3.17509	-0.313183	-0.0792638	0.0363403
BHUS33	-0.083235	-0.159378	-0.0878768	-0.216372	-0.13769	-0.132454	-0.0960876				0.914801	-0.448628	1.46222	-0.363644	-0.0380276	-0.274556
BHUS34	-0.569323	-0.462374	-0.378925	-0.304742	-0.183232	-0.29867	-0.197235				-0.187853	-0.180479	-0.195771	-0.398731	0.630009	-0.339621
BHUS35											#DIV/0!	#DIV/0!	#DIV/0!	#DIV/0!	#DIV/0!	#DIV/0!
KGZS1	-0.155498	-0.668508	-0.460311	-0.663671	-0.65742	-0.815765	-0.772139				3.29915	-0.311435	0.441787	-0.0094179	0.240858	-0.0534786
KGZS2	-0.864638	-0.77594	-0.770408	-0.81044	-0.93696	-0.831147	-0.838617				-0.102584	-0.00713043	0.0519623	0.156113	-0.112933	0.00898842
KGZS3	-0.190321	-0.478469	-0.277821	-0.366187	-0.412614	-0.469617	-0.814596				1.51401	-0.419354	0.31807	0.126786	0.138151	0.734594
KGZS4	-0.17487	-0.245769	-0.27443	-0.176253	-0.343013	-0.417117	-0.343326				0.405434	0.11662	-0.357749	0.946142	0.216038	-0.176908
KGZS5	-0.19751	-0.24592	-0.329961	-0.277354	-0.244766	-0.189275	-0.0916014				0.2451	0.341744	-0.159434	-0.117495	-0.226711	-0.516041
KGZS6	-0.10705	-0.170712	-0.168745	-0.14062	-0.225093	-0.140321	-0.162375				0.594692	-0.0115262	-0.166669	0.600714	-0.376609	0.157171
KGZS7	-0.240208	-0.207866	-0.247383	-0.207889	-0.293712	-0.300231	-0.30899				-0.134642	0.190105	-0.159645	0.41283	0.0221966	0.0291723
KGZS8	-0.693364	-0.762625	-0.26902	-0.197288	-0.304483	-0.26067	-0.215673				0.0998902	-0.647244	-0.266642	0.543341	-0.143893	-0.172622
KGZS9	-0.727256	-0.216633	-0.336998	-0.33439	-0.291509	-0.319937	-0.213803				-0.702123	0.555618	-0.00773919	-0.128237	0.0975205	-0.331734
KGZS10	-0.29123	-0.351014	-0.301093	-0.364723	-0.421205	-0.429652	-0.397851				0.205281	-0.142217	0.211329	0.154863	0.020054	-0.0740159
KGZS11	-0.133146	-0.349541	-0.179608	-0.608546	-0.660894	-0.766003	-0.758045				1.62524	-0.486161	2.3882	0.0860209	0.159041	-0.0103889
KGZS12	-0.916486	-0.887449	-0.953692	-0.911633	-0.78539	-0.903457	-0.884219				-0.0316822	0.0746443	-0.0441017	-0.13848	0.150329	-0.0212935
KGZS13	-0.302695	-0.182713	-0.243919	-0.204856	-0.218949	-0.20333	-0.151858				-0.396379	0.334981	-0.160145	0.0687911	-0.0713357	-0.253144
KGZS14	-0.0520292	-0.186034	-0.133513	-0.136381	-0.192946	-0.0934618	-0.0755025				2.57556	-0.28232	0.0214875	0.414755	-0.515607	-0.192156
KGZS15	-0.398455	-0.328562	-0.275584	-0.412699	-0.452782	-0.403014	-0.298274				-0.175412	-0.161242	0.497544	0.0971246	-0.109917	-0.259891
KGZS16	-0.231148	-0.19309	-0.180635	-0.181446	-0.158487	-0.136545	-0.107457				-0.16465	-0.0645016	0.00448798	-0.126531	-0.138446	-0.213032
KGZS17	-0.309811	-0.322894	-0.28911	-0.452033	-0.694252	-0.568228	-0.579846				0.042229	-0.104628	0.563531	0.535845	-0.181525	0.0204469
KGZS18	-0.189755	-0.421051	-0.2979	-0.31138	-0.61367	-0.468646	-0.475326				1.21892	-0.292485	0.0452513	0.970807	-0.236322	0.0142529
KGZS19	-0.320981	-0.568611	-0.452458	-0.5758	-0.607766	-0.661331	-0.628848				0.771477	-0.204275	0.272606	0.0555144	0.0881355	-0.0491185
KGZS20	-0.122249	-0.553965	-0.368731	-0.571346	-0.565117	-0.6894	-0.65198				3.53146	-0.334379	0.549493	-0.0109014	0.219924	-0.054279
KGZS21	0.245891	-0.257634	0.134977	-0.398668	-0.490271	-0.694828	-0.569791				-2.04776	-1.52391	-3.95359	0.229772	0.417233	-0.179954
KGZS22	-0.282254	-0.553578	-0.409231	-0.537267	-0.502007	-0.546225	-0.533354				0.961277	-0.260753	0.31287	-0.0656288	0.0880826	-0.0235648
KGZS23	-0.268697	-0.488754	-0.366057	-0.459565	-0.6229	-0.549246	-0.550003				0.818977	-0.25104	0.255445	0.355414	-0.118244	0.00137794
KGZS24	-0.139989	-0.0563092	-0.042945	-0.0447322	-0.0457062	-0.0454357	-0.0341624				-0.597759	-0.237337	0.0416154	0.0217739	-0.00591757	-0.248114
KGZS25	-0.233205	-0.457753	-0.345271	-0.487921	-0.474259	-0.498702	-0.463766				0.962878	-0.245727	0.413155	-0.0280005	0.0515389	-0.0700539
KGZS26	-0.29602	-0.405878	-0.301715	-0.37545	-0.378282	-0.399779	-0.359632				0.371114	-0.256635	0.244386	0.00754215	0.0568289	-0.100424
KGZS27	-0.204957	-0.357966	-0.254156	-0.356331	-0.439353	-0.407718	-0.374757				0.746544	-0.289999	0.402015	0.232992	-0.0720046	-0.0808434
KGZS28	-0.280129	-0.39015	-0.337545	-0.304965	-0.293569	-0.349482	-0.533274				0.392754	-0.134834	-0.0965184	-0.0373678	0.190458	0.525898
KGZS29	-0.5492	-0.600834	-0.598329	-0.572846	-0.795702	-0.691096	-0.687741				0.0940176	-0.00416891	-0.0425907	0.389033	-0.131465	-0.00485427
KGZS30	-0.442917	-0.560896	-0.560354	-0.483633	-0.629473	-0.557053	-0.558868				0.266366	-0.000966132	-0.136914	0.30155	-0.115049	0.00325894
KGZS31	-0.677394	-0.637297	-0.48093	-0.639735	-0.580407	-0.55131	-0.732143				-0.0591939	-0.24536	0.330206	-0.0927385	-0.0501332	0.328008
KGZS32	-0.323	-0.238703	-0.241888	-0.255013	-0.216775	-0.179108	-0.197166				-0.260979	0.0133407	0.05426	-0.149943	-0.173763	0.100823
KGZS33	-0.238064	-0.201822	-0.194856	-0.0879405	-0.101705	-0.0970964	-0.0883349				-0.152235	-0.0345179	-0.548689	0.156519	-0.0453126	-0.0902352
KGZS34	-0.256246	-0.320835	-0.411972	-0.292848	-0.317735	-0.318309	-0.253203				0.25206	0.284061	-0.289154	0.0849807	0.00180698	-0.204537
KGZS35											#DIV/0!	#DIV/0!	#DIV/0!	#DIV/0!	#DIV/0!	#DIV/0!
CAMS1	-0.129655	-0.853556	-0.668562	-0.783104	-0.859457	-0.866531	-0.873675				5.58328	-0.216733	0.171325	0.0975016	0.00823057	0.00824417
CAMS2	-0.284211	-0.365931	-0.301766	-0.342216	-0.326534	-0.368223	-0.459816				0.287533	-0.175348	0.134043	-0.0458222	0.127669	0.248744
CAMS3	-0.4454	-0.485725	-0.342432	-0.442294	-0.461605	-0.590112	-0.425761				0.0905376	-0.295009	0.291626	0.0436606	0.278392	-0.278508
CAMS4	-0.832896	-0.624284	-0.665233	-0.803398	-0.783603	-0.698371	-0.783538				-0.250466	0.0655938	0.207693	-0.0246389	-0.10877	0.121951
[truncated: 556 more rows]
