# Supplementary material for: Is China decoupling from the global value chain? A quantitative analysis framework based on the global production network
Source: Research Square preprint supplement (doi:10.21203/rs.3.rs-5355384/v1), 2025-04-10
Supplement: Supplementary file 5 [file f45756a8ae8a715f659eab90.xlsx]

## Sheet: BISC和GVCBDI
Sector	2007	2008	2009	2010	2011	2012	2013	2014	2015	2016	2017	2018	2019	2020	2021	2022	2023			2008	2009	2010	2011	2012	2013	2014	2015	2016	2017	2018	2019	2020	2021	2022	2023
AUSS1	0.289742	0.262018	0.283133	0.293576	0.208588	0.206018	0.216792	0.239385	0.207916	0.280723	0.348997	0.396299	0.359349	0.394957	0.359062	0.212715	0.292548			-0.0956854	0.0805865	0.0368848	-0.289492	-0.0123196	0.0522963	0.104214	-0.131458	0.350177	0.243209	0.135537	-0.093238	0.0990894	-0.090883	-0.407581	0.375304
AUSS2	0.0643654	0.0904475	0.296179	0.366902	0.144943	0.144105	0.13803	0.346256	0.299766	0.410556	0.413271	0.603896	0.521816	0.575504	0.505386	0.351617	0.45202			0.405219	2.2746	0.238785	-0.604956	-0.00577747	-0.0421589	1.50856	-0.134264	0.369587	0.00661295	0.46126	-0.135917	0.102888	-0.121838	-0.304261	0.285547
AUSS3	0.554271	0.531848	0.534941	0.545945	0.475779	0.467618	0.469377	0.494507	0.496857	0.528639	0.535118	0.610508	0.570484	0.597623	0.571201	0.486776	0.532526			-0.0404544	0.00581603	0.0205699	-0.128522	-0.0171537	0.00376109	0.053541	0.00475097	0.0639666	0.0122554	0.140886	-0.0655585	0.0475719	-0.0442132	-0.147802	0.0939855
AUSS4	0.0466393	0.0339782	0.0350875	0.0492975	0.017329	0.0172167	0.0229879	0.035313	0.0163999	0.0388382	0.0855307	0.146716	0.116519	0.0949881	0.0629965	0.00445693	0.0349778			-0.271469	0.0326489	0.404988	-0.648481	-0.00648396	0.335208	0.536161	-0.535586	1.3682	1.20223	0.715358	-0.205821	-0.184782	-0.336796	-0.929251	6.84797
AUSS5	0.0346131	0.020955	-0.00474151	0.00399005	0.0129439	0.00660705	-0.00570105	-0.00449929	-0.00717584	-0.00430239	0.0133832	0.0574611	0.0353155	0.0398422	0.0101977	-0.0166125	-0.0022198			-0.394592	-1.22627	-1.84151	2.24405	-0.489563	-1.86287	-0.210797	0.594884	-0.400435	-4.11065	3.29352	-0.385402	0.128179	-0.744049	-2.62905	-0.866378
AUSS6	0.168736	0.153039	0.165873	0.171416	0.112989	0.105548	0.0898999	0.103359	0.0688575	0.103796	0.194716	0.249442	0.217177	0.237675	0.198386	0.106038	0.155879			-0.0930234	0.0838575	0.0334146	-0.340845	-0.0658576	-0.148257	0.14971	-0.333802	0.507408	0.875942	0.281056	-0.129347	0.0943829	-0.165304	-0.465498	0.470029
AUSS7	0.254878	0.212769	0.235657	0.223676	0.122848	0.106815	0.141746	0.16707	0.174904	0.219643	0.30264	0.304921	0.241036	0.27681	0.21449	0.138923	0.220194			-0.16521	0.107573	-0.0508416	-0.450777	-0.130508	0.327018	0.178658	0.0468924	0.255787	0.377872	0.00753958	-0.209514	0.148417	-0.225138	-0.352308	0.585006
AUSS8	0.179065	0.153707	0.31054	0.340028	0.11953	0.119078	0.145837	0.286213	-0.554172	-0.502621	-0.218038	0.222372	-0.444438	-0.35473	-0.276392	-0.277587	-0.322218			-0.141616	1.02034	0.0949561	-0.648471	-0.00377718	0.224714	0.962555	-2.93623	-0.093025	-0.566197	-2.01988	-2.99862	-0.201846	-0.220838	0.00432229	0.16078
AUSS9	0.174853	0.148394	0.188692	0.199654	0.121311	0.11905	0.0783736	0.09426	0.101304	0.154609	0.0417427	0.238611	0.188198	0.248537	0.192437	0.0760525	0.164879			-0.15132	0.27156	0.0580917	-0.392393	-0.0186403	-0.341673	0.202701	0.0747251	0.526195	-0.730011	4.71624	-0.211276	0.32061	-0.225718	-0.604794	1.16796
AUSS10	0.147114	0.120283	0.149472	0.145398	0.0859387	0.0766226	0.0393908	0.0443234	0.0331644	0.0508803	0.0672428	0.177372	0.137175	0.171158	0.105178	0.0234043	0.0726679			-0.182379	0.242671	-0.0272609	-0.40894	-0.108405	-0.485911	0.125221	-0.251763	0.534185	0.321589	1.63778	-0.226624	0.247734	-0.38549	-0.77748	2.1049
AUSS11	-0.0372849	-0.0528091	0.0835625	0.0592423	-0.0464859	-0.0471682	0.0580664	0.075548	0.0819832	0.113367	0.0851683	0.241925	0.179236	0.212881	0.196984	0.070869	0.158745			0.416366	-2.58235	-0.291042	-1.78468	0.0146777	-2.23105	0.301062	0.0851801	0.38281	-0.248739	1.84055	-0.259124	0.187713	-0.0746773	-0.64023	1.23998
AUSS12	-0.334036	-0.196106	-0.00321571	0.16338	-0.147847	-0.151866	-0.25721	-0.275471	-0.206262	0.0315149	0.33209	0.544598	0.55337	0.612265	0.585021	0.458213	0.539308			-0.412922	-0.983602	-51.8068	-1.90493	0.0271834	0.693667	0.0709968	-0.251239	-1.15279	9.53756	0.639911	0.016106	0.10643	-0.0444965	-0.216759	0.176981
AUSS13	-0.257021	-0.195608	-0.118502	-0.061719	-0.149006	-0.146964	-0.124556	-0.108315	0.0885095	0.118931	0.141557	0.215445	0.166474	0.218684	0.169503	0.060021	0.126544			-0.238939	-0.394188	-0.479174	1.41426	-0.0137056	-0.15247	-0.130391	-1.81715	0.343706	0.190243	0.521974	-0.227301	0.313622	-0.224897	-0.6459	1.10832
AUSS14	-0.248748	-0.190493	-0.117528	-0.0638277	-0.136928	-0.127451	-0.0461439	-0.0878219	0.0405539	0.0619385	0.105044	0.190642	0.0338037	0.008135	0.131304	0.0291105	0.0895708			-0.234193	-0.383031	-0.456917	1.14527	-0.0692104	-0.637948	0.903219	-1.46177	0.527313	0.695938	0.81488	-0.822685	-0.759346	15.1407	-0.778298	2.07693
AUSS15	-0.13359	-0.149389	-0.0658763	-0.00874935	-0.0953928	-0.072396	-0.00428627	0.0350123	0.164182	0.220003	0.307166	0.327053	0.260074	0.301417	0.228476	0.099523	0.17982			0.118263	-0.559029	-0.867185	9.90285	-0.241076	-0.940794	-9.16848	3.68927	0.339994	0.396189	0.0647433	-0.204794	0.158967	-0.241994	-0.564406	0.806818
AUSS16	-0.185932	-0.148484	-0.0980802	-0.0607612	-0.0986008	-0.0935087	-0.0828869	-0.0866715	-0.099173	-0.0731581	-0.00427507	0.0474468	0.068866	0.081395	0.0377601	-0.0224673	0.013893			-0.201403	-0.339458	-0.380494	0.622757	-0.0516428	-0.113592	0.0456589	0.14424	-0.262318	-0.941564	-12.0985	0.451435	0.181933	-0.536088	-1.595	-1.61837
AUSS17	0.0658094	0.0680488	0.189552	0.25528	0.202058	0.262831	0.279341	0.301861	0.318697	0.358973	0.447646	0.481136	0.414345	0.469597	0.435863	0.290351	0.376389			0.0340293	1.78553	0.346753	-0.208486	0.300774	0.0628131	0.0806198	0.0557744	0.126377	0.247019	0.0748134	-0.138819	0.133348	-0.0718358	-0.333848	0.296323
AUSS18	0.337243	0.338029	0.446387	0.467424	0.338327	0.367411	0.378621	0.42646	0.445771	0.493116	0.592745	0.643273	0.571841	0.616584	0.583325	0.405193	0.520132			0.0023316	0.320555	0.0471291	-0.276189	0.0859651	0.0305106	0.12635	0.0452825	0.106208	0.202041	0.0852434	-0.111045	0.0782453	-0.0539408	-0.305373	0.283664
AUSS19	0.00434717	-0.0321853	0.000287373	0.0410174	-0.0161216	-0.00451412	0.0573074	0.0773933	0.0867398	0.102784	0.13851	0.163573	-0.106714	0.225574	0.16084	0.0442881	0.113031			-8.40373	-1.00893	141.733	-1.39304	-0.719996	-13.6951	0.350493	0.120767	0.184968	0.347585	0.180949	-1.65239	-3.11383	-0.286975	-0.724645	1.55217
AUSS20	0.462513	0.425141	0.444992	0.463683	0.367694	0.361262	0.37632	0.409404	0.429694	0.46667	0.503185	0.550994	0.492134	0.524164	0.492594	0.345347	0.451635			-0.0808013	0.046694	0.0420022	-0.207014	-0.0174938	0.041681	0.0879156	0.0495605	0.0860505	0.0782473	0.0950129	-0.106825	0.0650833	-0.0602293	-0.298922	0.307772
AUSS21	0.453338	0.414025	0.430191	0.423667	0.324819	0.325322	0.318853	0.35009	0.353204	0.403947	0.45544	0.536365	0.475964	0.526956	0.506171	0.360473	0.456548			-0.0867187	0.0390478	-0.0151663	-0.233314	0.00154825	-0.0198861	0.0979669	0.00889561	0.143664	0.127474	0.177686	-0.112613	0.107134	-0.0394432	-0.287843	0.266524
AUSS22	0.501913	0.474134	0.492587	0.487177	0.397649	0.368751	0.372461	0.408793	0.38634	0.418675	0.457394	0.531496	0.474053	0.49446	0.453209	0.323236	0.439346			-0.0553448	0.0389175	-0.0109816	-0.183768	-0.072674	0.0100622	0.0975446	-0.0549246	0.0836972	0.0924778	0.162009	-0.108078	0.0430486	-0.0834261	-0.286783	0.35921
AUSS23	0.157062	0.106396	0.283572	0.319691	0.251748	0.25343	0.244368	0.27205	0.273458	0.314402	0.328089	0.411952	0.346413	0.408265	0.342574	0.192202	0.297422			-0.322586	1.66525	0.127372	-0.212528	0.00668077	-0.0357571	0.113283	0.0051758	0.149725	0.043535	0.255609	-0.159094	0.178549	-0.160901	-0.438949	0.547446
AUSS24	0.0736663	0.0513605	0.0674747	0.0649586	0.0203173	0.0227333	0.00922961	0.024283	0.0286792	0.0432526	0.0585026	0.141965	0.107766	0.126923	0.0738709	0.00308949	0.0540336			-0.302796	0.313749	-0.0372907	-0.687227	0.11891	-0.594004	1.63099	0.181037	0.508156	0.35258	1.42664	-0.240896	0.177766	-0.417987	-0.958177	16.4895
AUSS25	0.240233	0.153714	0.252661	-0.0619204	0.146337	0.0461716	0.197278	0.217262	0.216684	0.257191	0.226409	0.364409	0.306441	0.306937	0.141066	0.0781096	0.159044			-0.360147	0.64371	-1.24507	-3.36331	-0.684485	3.27271	0.101298	-0.00265975	0.186942	-0.119686	0.609518	-0.159074	0.00161822	-0.540408	-0.446289	1.03617
AUSS26	0.349146	0.324253	0.364799	0.378633	0.296467	0.306174	0.292536	0.320112	0.259788	0.300632	0.403632	0.452167	0.396374	0.427146	0.397992	0.280031	0.381713			-0.071297	0.125044	0.037921	-0.217008	0.0327446	-0.0445431	0.0942634	-0.188445	0.15722	0.342611	0.120244	-0.123389	0.0776321	-0.0682517	-0.29639	0.363108
AUSS27	0.183839	0.252479	0.320089	0.33439	0.251833	0.265883	0.25985	0.285388	0.288582	0.323321	0.406222	0.485731	0.426408	0.466295	0.429627	0.283075	0.371599			0.373365	0.267787	0.0446784	-0.24689	0.055792	-0.0226918	0.098281	0.0111911	0.120381	0.256403	0.195728	-0.122132	0.0935434	-0.0786366	-0.341116	0.312725
AUSS28	0.330787	0.387907	0.46084	0.490423	0.420974	0.439299	0.449162	0.475095	0.51371	0.556479	0.652176	0.643108	0.587127	0.626726	0.604794	0.481884	0.554558			0.172678	0.188018	0.0641935	-0.141611	0.0435303	0.0224524	0.0577358	0.0812773	0.0832565	0.171968	-0.0139039	-0.087048	0.0674462	-0.0349943	-0.203227	0.150813
AUSS29	0.41659	0.386105	0.440712	0.467504	0.392079	0.424127	0.438193	0.478826	0.519049	0.559955	0.678345	0.688318	0.620287	0.636806	0.570283	0.425615	0.516338			-0.0731765	0.14143	0.0607922	-0.161336	0.0817386	0.0331666	0.0927275	0.0840026	0.0788102	0.211427	0.0147033	-0.0988373	0.0266307	-0.104463	-0.253677	0.213158
AUSS30	0.457421	0.432769	0.475082	0.485002	0.402299	0.413284	0.431204	0.45948	0.468158	0.512751	0.580331	0.603953	0.543827	0.584141	0.561168	0.417036	0.502085			-0.0538924	0.097771	0.020881	-0.170521	0.0273047	0.0433615	0.0655732	0.0188886	0.0952506	0.131798	0.0407047	-0.0995544	0.0741301	-0.0393268	-0.256844	0.203939
AUSS31	0.315677	0.315486	0.391214	0.412881	0.332503	0.355526	0.337495	0.367083	0.373924	0.416778	0.462353	0.562528	0.492152	0.562614	0.544086	0.383822	0.478422			-0.000603249	0.240034	0.0553839	-0.194675	0.0692399	-0.0507144	0.0876675	0.0186375	0.114604	0.109351	0.216665	-0.125108	0.143173	-0.0329321	-0.294557	0.246468
AUSS32	0.226065	0.217413	0.266837	0.28126	0.199143	0.209719	0.209345	0.240797	0.252171	0.317316	0.399866	0.481459	0.415377	0.453324	0.424416	0.270415	0.360773			-0.0382728	0.227328	0.0540509	-0.291962	0.0531068	-0.0017818	0.150241	0.0472312	0.258339	0.26015	0.204051	-0.137253	0.0913549	-0.063768	-0.362854	0.334145
AUSS33	0.237668	0.234101	0.290318	0.316914	0.234067	0.25062	0.280962	0.312189	0.320452	0.375427	0.450368	0.43965	0.337078	0.528571	0.292508	0.376219	0.455504			-0.015009	0.24014	0.0916117	-0.261419	0.0707183	0.121071	0.111141	0.0264698	0.171554	0.199616	-0.0237996	-0.233304	0.568099	-0.446606	0.286182	0.210742
AUSS34	0.351312	0.33684	0.381602	0.393302	0.311329	0.318213	0.318909	0.35111	0.365243	0.40947	0.461103	0.539681	0.471455	0.509051	0.473456	0.331598	0.41771			-0.0411938	0.132889	0.0306596	-0.208421	0.0221111	0.0021869	0.100973	0.0402502	0.121092	0.126095	0.170413	-0.126418	0.0797447	-0.0699254	-0.299621	0.259687
AUSS35	0.0876899	0.0643207	0.0791578	0.069195	0.0122781	-0.00255489	-0.0200728	-0.0151328	-0.0158431	-0.00903516	0.00667038	0.036454	0.0184485	0.0264239	0.00195524	-0.0263053	-0.00961348			-0.266499	0.230675	-0.12586	-0.822559	-1.20809	6.85663	-0.246106	0.0469388	-0.429709	-1.73827	4.46507	-0.493925	0.432308	-0.926005	-14.4538	-0.634541
AUTS1	0.0322328	0.0398732	0.100585	0.0382124	0.0101018	-0.0875554	-0.135122	-0.155191	-0.63846	-0.206711	-0.165609	-0.203085	-0.154566	-0.098506	-0.177943	-0.170767	-0.190215			0.237038	1.52262	-0.620098	-0.735641	-9.6673	0.543279	0.148522	3.11402	-0.676235	-0.198839	0.226295	-0.238913	-0.362691	0.806421	-0.0403317	0.113886
AUTS2	-0.115233	-0.110586	-0.0808551	-0.0926456	-0.11244	-0.170907	-0.195872	-0.206632	-0.39697	-0.203165	-0.199837	-0.23119	-0.196828	-0.172034	-0.196343	-0.247174	-0.333292			-0.0403274	-0.268848	0.145823	0.213655	0.51999	0.146073	0.05493	0.92115	-0.488212	-0.0163783	0.156892	-0.14863	-0.125969	0.141303	0.258889	0.348412
AUTS3	0.257904	0.265171	0.319924	0.298693	0.258198	0.111754	0.0176838	-0.029228	-0.263401	-0.185774	-0.0293761	-0.139153	-0.032555	0.0720735	-0.136486	-0.084134	-0.0682376			0.0281794	0.20648	-0.0663608	-0.135574	-0.567178	-0.841761	-2.65281	8.01192	-0.294709	-0.841872	3.73693	-0.766048	-3.2139	-2.89371	-0.383571	-0.188941
AUTS4	-0.431351	-0.409229	-0.394094	-0.371053	-0.350277	-0.352441	-0.360706	-0.371204	-0.334387	-0.202003	-0.30363	-0.270635	-0.200573	-0.144493	-0.161381	-0.155283	-0.146986			-0.051285	-0.0369836	-0.0584671	-0.055991	0.00617707	0.0234499	0.0291045	-0.099182	-0.3959	0.503097	-0.108668	-0.258883	-0.279596	0.116875	-0.0377851	-0.0534342
AUTS5	-0.0902588	-0.0881337	-0.0746652	-0.0800835	-0.0855776	-0.115288	-0.127701	-0.136239	-0.179667	-0.197427	-0.174169	-0.183512	-0.15384	-0.134652	-0.160169	-0.154786	-0.151278			-0.0235449	-0.152819	0.072568	0.0686047	0.347174	0.107671	0.0668605	0.31876	0.0988468	-0.117806	0.0536449	-0.161688	-0.124731	0.189504	-0.0336072	-0.0226641
AUTS6	0.0798974	0.0708158	0.117467	0.104433	0.0713983	-0.0458385	-0.0848799	-0.0976255	-0.435055	-0.163904	-0.0850931	-0.122206	-0.097251	-0.0517551	-0.0699907	-0.100901	-0.196738			-0.113666	0.658773	-0.110958	-0.316327	-1.64201	0.851716	0.150161	3.45637	-0.623256	-0.480837	0.436144	-0.204204	-0.46782	0.352345	0.441628	0.949825
AUTS7	-0.225942	-0.212999	-0.142992	-0.233722	-0.239341	-0.290446	-0.268445	-0.248427	-0.285486	-0.290736	-0.314937	-0.30445	-0.236032	-0.179932	-0.218787	-0.373211	-0.433568			-0.057283	-0.328674	0.634513	0.0240403	0.213526	-0.0757506	-0.0745704	0.149177	0.0183903	0.0832371	-0.0332982	-0.224726	-0.237681	0.215945	0.70582	0.161723
AUTS8	-0.710714	-0.708554	-0.40942	-0.598993	-0.68498	-0.770324	-0.814557	-0.678425	-0.880411	-0.740341	-0.702485	-0.735528	-0.666123	-0.502438	-0.619812	-0.642199	-0.625919			-0.00303878	-0.422176	0.463029	0.143552	0.124594	0.0574208	-0.167124	0.297728	-0.159096	-0.0511324	0.0470363	-0.0943599	-0.245728	0.233609	0.0361196	-0.0253504
AUTS9	-0.594072	-0.596697	-0.669263	-0.73732	-0.728086	-0.725927	-0.735908	-0.726195	-0.65911	-0.628648	-0.67692	-0.630287	-0.56522	-0.59256	-0.639063	-0.633788	-0.678628			0.0044186	0.121612	0.10169	-0.0125235	-0.00296611	0.0137501	-0.0131992	-0.092378	-0.0462173	0.0767869	-0.0688898	-0.103234	0.0483715	0.0784776	-0.00825441	0.0707487
AUTS10	-0.472143	-0.4699	-0.486452	-0.493924	-0.492576	-0.488069	-0.503858	-0.499226	-0.443775	-0.343683	-0.458574	-0.294962	-0.266622	-0.307962	-0.286155	-0.318852	-0.222773			-0.00474999	0.035224	0.0153603	-0.00272913	-0.00914866	0.0323491	-0.0091936	-0.111073	-0.225546	0.334293	-0.356784	-0.0960809	0.155052	-0.0708118	0.114265	-0.301327
AUTS11	-0.0403675	-0.0320071	0.00799028	-0.110448	-0.112201	-0.21629	-0.219316	-0.219168	-0.322338	-0.26135	-0.419417	-0.349027	-0.284713	-0.288282	-0.312125	-0.466056	-0.495874			-0.207108	-1.24964	-14.8227	0.0158754	0.927702	0.0139914	-0.000675964	0.470734	-0.189206	0.604812	-0.167829	-0.184266	0.0125368	0.0827057	0.493174	0.0639786
AUTS12	-0.700715	-0.704514	-0.642074	-0.659612	-0.682947	-0.664465	-0.663174	-0.649588	-0.641223	-0.51435	-0.549346	-0.612192	-0.577884	-0.536296	-0.684105	-0.714982	-0.610157			0.00542135	-0.0886288	0.0273146	0.0353777	-0.0270629	-0.00194192	-0.0204871	-0.0128768	-0.197861	0.068039	0.114401	-0.0560405	-0.0719658	0.27561	0.0451347	-0.146612
AUTS13	-0.556483	-0.570938	-0.506597	-0.537136	-0.538114	-0.521569	-0.513806	-0.51152	-0.473317	-0.301663	-0.422269	-0.407899	-0.441707	-0.440705	-0.522932	-0.524648	-0.523412			0.0259751	-0.112693	0.0602813	0.00182175	-0.0307473	-0.0148839	-0.00444922	-0.0746843	-0.362662	0.399801	-0.0340295	0.0828834	-0.00226854	0.186581	0.00328103	-0.00235642
AUTS14	-0.575803	-0.545943	-0.495662	-0.553226	-0.537685	-0.545156	-0.562234	-0.557854	-0.69555	-0.367093	-0.514873	-0.490521	-0.431743	-0.445312	-0.434534	-0.401695	-0.536376			-0.0518574	-0.0920994	0.116135	-0.0280907	0.0138938	0.0313268	-0.00778945	0.246831	-0.472226	0.402566	-0.0472961	-0.119829	0.0314304	-0.0242042	-0.0755731	0.335283
AUTS15	-0.74807	-0.742757	-0.714998	-0.702754	-0.68695	-0.685617	-0.695632	-0.69467	-0.624446	-0.587426	-0.643456	-0.733781	-0.686512	-0.716941	-0.697582	-0.716107	-0.687589			-0.00710192	-0.0373725	-0.0171248	-0.0224881	-0.00194093	0.014608	-0.00138286	-0.101091	-0.0592848	0.0953837	0.140374	-0.0644194	0.0443254	-0.0270022	0.0265547	-0.0398231
AUTS16	-0.39195	-0.420489	-0.433335	-0.469505	-0.532505	-0.426961	-0.423809	-0.407778	-0.413773	-0.319427	-0.394738	-0.407082	-0.349228	-0.38457	-0.440303	-0.457131	-0.431695			0.0728122	0.0305505	0.0834692	0.134183	-0.198202	-0.00738362	-0.0378252	0.0147024	-0.228015	0.235771	0.0312694	-0.142118	0.1012	0.144923	0.0382195	-0.0556435
AUTS17	-0.568148	-0.558265	-0.457352	-0.596479	-0.632398	-0.751041	-0.789387	-0.675947	-0.886317	-0.815495	-0.89176	-0.846735	-0.783166	-0.764862	-0.821339	-0.880677	-0.887218			-0.0173961	-0.180762	0.304202	0.0602191	0.187607	0.051058	-0.143707	0.311222	-0.0799058	0.0935203	-0.0504897	-0.0750756	-0.0233724	0.0738394	0.0722462	0.00742668
AUTS18	-0.0320562	-0.0232721	0.0555434	0.0779723	0.0129616	-0.0377512	-0.023244	-0.0507034	-0.0102827	-0.248099	-0.336722	-0.398397	0.016742	0.108672	-0.153294	-0.0705859	-0.0825664			-0.274021	-3.38669	0.403807	-0.833767	-3.91254	-0.384283	1.18135	-0.797199	23.1278	0.35721	0.183161	-1.04202	5.49096	-2.41061	-0.539538	0.169729
AUTS19	-0.132937	-0.115633	-0.0398045	-0.105484	-0.10082	-0.182876	-0.234843	-0.252789	-0.145952	-0.325872	-0.304148	-0.346817	-0.23949	-0.171895	-0.321986	-0.320752	-0.21697			-0.130165	-0.65577	1.65004	-0.0442065	0.813878	0.284166	0.076418	-0.422634	1.23274	-0.0666652	0.140291	-0.309464	-0.282244	0.873153	-0.0038333	-0.323557
AUTS20	0.215015	0.19767	0.29548	0.285284	0.200528	0.00218788	-0.122129	-0.17993	0.0529543	-0.340736	-0.224319	-0.236636	-0.114631	-0.021045	-0.121293	-0.086286	-0.114465			-0.080665	0.494811	-0.0345062	-0.297095	-0.989089	-56.8206	0.473281	-1.29431	-7.43453	-0.341664	0.0549058	-0.515579	-0.816411	4.76352	-0.288615	0.326582
AUTS21	0.160317	0.136723	0.204531	0.231922	0.198551	0.0717449	-0.0331749	-0.0827018	-0.119296	-0.17754	-0.298304	-0.164567	-0.0206687	0.0825778	-0.042508	-0.25574	-0.312421			-0.147171	0.495957	0.133918	-0.143889	-0.638657	-1.4624	1.49291	0.442482	0.488234	0.680208	-0.448324	-0.874406	-4.9953	-1.51476	5.01629	0.221634
AUTS22	0.222905	0.22354	0.2652	0.285344	0.248016	0.196832	0.126409	0.100833	-0.0049045	-0.029625	-0.275225	-0.0336497	0.0768338	0.0327452	-0.0735511	-0.171576	-0.193897			0.00284751	0.186368	0.0759555	-0.130818	-0.206372	-0.357781	-0.202326	-1.04864	5.04038	8.2903	-0.877738	-3.28334	-0.573818	-3.24616	1.33274	0.130098
AUTS23	-0.106814	-0.17006	0.0459341	-0.156191	-0.213564	-0.304231	-0.172501	-0.205991	-0.492508	-0.291685	-0.421583	-0.25565	-0.166048	-0.097604	-0.156792	-0.227887	-0.238194			0.592107	-1.27011	-4.40033	0.367326	0.424543	-0.432994	0.194145	1.39092	-0.407756	0.445337	-0.393595	-0.350488	-0.412193	0.606409	0.453434	0.0452294
AUTS24	-0.0998649	-0.10351	-0.0859322	-0.0856761	-0.08122	-0.0626664	-0.0674489	-0.0682137	-0.0587431	-0.0590494	-0.0849302	-0.0757279	-0.0819508	-0.0719267	-0.0786923	-0.0859554	-0.0902228			0.0365039	-0.169821	-0.00298051	-0.0520105	-0.228436	0.0763165	0.0113391	-0.138837	0.00521433	0.43829	-0.108352	0.0821749	-0.122318	0.0940619	0.0922975	0.049647
AUTS25	-0.180822	-0.236191	-0.0275281	-0.16343	-0.184512	-0.333487	-0.214611	-0.117293	-0.412191	-0.184333	-0.295249	-0.184633	-0.101543	-0.0825067	-0.1534	-0.237432	-0.232952			0.306206	-0.88345	4.93683	0.128996	0.807406	-0.356465	-0.45346	2.51419	-0.552798	0.601718	-0.374654	-0.45003	-0.187467	0.859245	0.547797	-0.0188693
AUTS26	-0.0949579	-0.118952	-0.0916397	-0.0574287	-0.0817095	-0.112291	-0.173024	-0.19837	-0.144836	-0.284769	-0.440762	-0.268927	-0.164196	-0.101257	-0.182196	-0.323611	-0.306463			0.252684	-0.229609	-0.373321	0.422799	0.374274	0.540848	0.146489	-0.269871	0.966156	0.547786	-0.38986	-0.389438	-0.383319	0.799341	0.776175	-0.0529891
AUTS27	-0.0197897	-0.032612	0.0518278	0.0137943	-0.0473352	-0.178475	-0.236135	-0.255271	-0.148201	-0.321229	-0.294425	-0.305767	-0.238575	-0.179538	-0.22618	-0.211848	-0.217101			0.647926	-2.58922	-0.733844	-4.43151	2.77045	0.323067	0.08104	-0.419437	1.16753	-0.0834433	0.0385234	-0.219749	-0.247457	0.25979	-0.0633669	0.0247979
AUTS28	0.150108	0.134082	0.231782	0.215532	0.138238	-0.0669415	-0.169842	-0.223236	-0.0068333	-0.381902	-0.321314	-0.315757	-0.179023	-0.084016	-0.187166	-0.14999	-0.156215			-0.106764	0.72866	-0.0701106	-0.358617	-1.48425	1.53718	0.314374	-0.96939	54.8884	-0.158649	-0.0172935	-0.433035	-0.530698	1.22774	-0.198622	0.0414972
AUTS29	0.130073	0.1046	0.191618	0.227227	0.174874	0.137515	0.0980788	0.124314	-0.186096	-0.11269	-0.409567	-0.205213	-0.0103728	0.011133	-0.118293	-0.373237	-0.424788			-0.195839	0.831912	0.185833	-0.230402	-0.213631	-0.286778	0.267491	-2.49698	-0.394453	2.63446	-0.49895	-0.949453	-2.07329	-11.6254	2.15519	0.138118
AUTS30	0.105599	0.0830158	0.201616	0.182784	0.0871758	-0.150198	-0.264716	-0.326793	-0.0888355	-0.505859	-0.463072	-0.418094	-0.267194	-0.156692	-0.269537	-0.212304	-0.193018			-0.21386	1.42864	-0.0934021	-0.523067	-2.72293	0.762445	0.234506	-0.72816	4.69433	-0.0845819	-0.09713	-0.360923	-0.413566	0.720175	-0.212338	-0.0908423
AUTS31	0.0570018	0.0466767	0.12661	0.164153	0.111516	0.00702372	-0.0764055	-0.108826	-0.175444	-0.206409	-0.326119	-0.194562	-0.0700655	-0.0498255	-0.108253	-0.284373	-0.321198			-0.181136	1.71249	0.296527	-0.320659	-0.937016	-11.8782	0.424325	0.612143	0.1765	0.579962	-0.403402	-0.63988	-0.288873	1.17263	1.62694	0.129497
AUTS32	-0.0536213	-0.0572085	-0.0222615	-0.0194844	-0.0555804	-0.111582	-0.143634	-0.156147	-0.236038	-0.271314	-0.466091	-0.244337	-0.174481	-0.174859	-0.220275	-0.365317	-0.419305			0.0668989	-0.610871	-0.124747	1.85256	1.00758	0.287256	0.0871121	0.511644	0.149448	0.717905	-0.475775	-0.285898	0.0021667	0.259725	0.65846	0.147784
AUTS33	0.105176	0.0976424	0.165231	-0.0649286	0.0532759	-0.0906261	-0.171642	-0.20932	-0.265597	-0.304213	-0.472887	-0.256972	-0.134564	-0.125922	-0.195535	-0.391499	-0.465316			-0.0716321	0.692204	-1.39296	-1.82053	-2.70107	0.893964	0.21951	0.26886	0.14539	0.554462	-0.456588	-0.476348	-0.0642191	0.552821	1.00219	0.18855
AUTS34	0.0494727	0.0477223	0.136412	0.104899	0.0253647	-0.14422	-0.222542	-0.259443	-0.153165	-0.294918	-0.253243	-0.324182	-0.327753	-0.164176	-0.221826	-0.236899	-0.306139			-0.0353816	1.85845	-0.23101	-0.758199	-6.68585	0.543071	0.165817	-0.409641	0.925498	-0.14131	0.280122	0.0110157	-0.499086	0.351144	0.067949	0.292277
AUTS35																				#DIV/0!	#DIV/0!	#DIV/0!	#DIV/0!	#DIV/0!	#DIV/0!	#DIV/0!	#DIV/0!	#DIV/0!	#DIV/0!	#DIV/0!	#DIV/0!	#DIV/0!	#DIV/0!	#DIV/0!	#DIV/0!
BELS1	0.0555172	-0.0989977	-0.0614493	-0.179776	-0.310129	-0.29525	-0.265887	-0.334814	-0.400763	-0.512949	-0.512482	-0.400346	-0.400941	-0.335022	-0.478622	-0.530134	-0.382916			-2.78319	-0.379286	1.9256	0.725087	-0.0479765	-0.0994494	0.25923	0.196974	0.27993	-0.000909457	-0.218809	0.00148647	-0.164412	0.428629	0.107627	-0.2777
BELS2	-0.120918	-0.148768	-0.135395	-0.135671	-0.133486	-0.132753	-0.148349	-0.16104	-0.143005	-0.175333	-0.177954	-0.13935	-0.132941	-0.164442	-0.171423	-0.154087	-0.154301			0.230318	-0.0898913	0.00203645	-0.0161042	-0.00548854	0.117482	0.0855461	-0.111993	0.226065	0.0149483	-0.216933	-0.0459912	0.236956	0.0424513	-0.101129	0.00138763
BELS3	0.298235	0.0719824	0.116834	-0.133189	-0.348352	-0.307455	-0.26188	-0.389284	-0.49795	-0.713755	-0.719001	-0.579611	-0.519721	-0.414684	-0.642136	-0.709499	-0.478545			-0.758639	0.623088	-2.13999	1.61548	-0.117403	-0.148233	0.4865	0.279144	0.433386	0.00734988	-0.193866	-0.103329	-0.202102	0.548496	0.104903	-0.325516
BELS4	-0.0485689	-0.192878	-0.190953	-0.186362	-0.182373	-0.189171	-0.24267	-0.277146	-0.279795	-0.274196	-0.384678	-0.240231	-0.263798	-0.324871	-0.434281	-0.330306	-0.369305			2.97122	-0.00997828	-0.024043	-0.0214039	0.0372721	0.282809	0.142072	0.0095562	-0.020011	0.402933	-0.375502	0.0981	0.231517	0.336779	-0.23942	0.118071
BELS5	-0.0798315	-0.0843037	-0.0887115	-0.0843371	-0.0684351	-0.070215	-0.097118	-0.0740404	-0.0757481	-0.0901332	-0.0716674	-0.0875864	-0.0772364	-0.083787	-0.0725305	-0.0681089	-0.0773654			0.0560207	0.052285	-0.0493106	-0.188553	0.0260099	0.383151	-0.237625	0.0230651	0.189907	-0.204873	0.222124	-0.118169	0.0848119	-0.134347	-0.0609617	0.135907
BELS6	-0.112859	-0.180237	-0.166097	-0.165338	-0.198758	-0.201638	-0.194367	-0.200189	-0.216281	-0.355783	-0.370346	-0.248822	-0.134995	-0.163551	-0.269787	-0.228212	-0.162362			0.59701	-0.0784536	-0.00457157	0.202132	0.0144917	-0.0360574	0.0299539	0.0803834	0.645002	0.0409309	-0.328136	-0.457463	0.211534	0.649558	-0.154103	-0.288546
BELS7	-0.0769658	-0.246361	-0.23798	-0.206133	-0.197328	-0.200784	-0.286334	-0.3406	-0.360111	-0.328005	-0.329355	-0.225224	-0.198971	-0.257806	-0.316687	-0.248296	-0.216264			2.20091	-0.0340169	-0.133823	-0.0427149	0.0175139	0.426081	0.189519	0.0572832	-0.0891548	0.00411337	-0.316166	-0.116562	0.295696	0.228391	-0.215957	-0.129007
BELS8	-0.678251	-0.607392	-0.566824	-0.688633	-0.764913	-0.745935	-0.679967	-0.737199	-0.835929	-0.857018	-0.868591	-0.497856	0.0177137	-0.232107	-0.626382	-0.682871	-0.509243			-0.104472	-0.0667913	0.214897	0.11077	-0.0248094	-0.0884371	0.0841692	0.133925	0.0252285	0.0135045	-0.426823	-1.03558	-14.1032	1.69868	0.0901828	-0.254263
BELS9	-0.333595	-0.36378	-0.298119	-0.382969	-0.38706	-0.448654	-0.511644	-0.522811	-0.586375	-0.790728	-0.830386	-0.662007	-0.754779	-0.785356	-0.888196	-0.855854	-0.845848			0.090482	-0.180497	0.28462	0.0106816	0.159134	0.140397	0.0218245	0.121583	0.348502	0.0501527	-0.202771	0.140137	0.0405118	0.130947	-0.036414	-0.0116913
BELS10	-0.121997	-0.229276	-0.217399	-0.269345	-0.297788	-0.287734	-0.216252	-0.299825	-0.332745	-0.330266	-0.39729	-0.411229	-0.30354	-0.251688	-0.610085	-0.526461	-0.539233			0.879355	-0.0518017	0.238943	0.105598	-0.0337615	-0.248431	0.386463	0.109797	-0.00745208	0.20294	0.035084	-0.26187	-0.170824	1.42397	-0.137069	0.0242605
BELS11	-0.0859917	-0.2009	-0.223044	-0.202904	-0.196388	-0.199685	-0.27358	-0.325193	-0.336998	-0.417121	-0.503991	-0.279476	-0.191877	-0.252984	-0.336423	-0.2514	-0.214001			1.33627	0.110224	-0.0902976	-0.032111	0.0167889	0.370053	0.188661	0.0363	0.237755	0.208262	-0.445474	-0.313439	0.318467	0.329818	-0.252725	-0.148764
BELS12	-0.492666	-0.490839	-0.466946	-0.491808	-0.482288	-0.456552	-0.452422	-0.477045	-0.498419	-0.784889	-0.795466	-0.694745	-0.530743	-0.512003	-0.61654	-0.606512	-0.547225			-0.00370764	-0.0486786	0.0532435	-0.0193559	-0.0533626	-0.00904774	0.0544259	0.0448059	0.574756	0.0134753	-0.126618	-0.236061	-0.0353099	0.204172	-0.0162639	-0.0977516
BELS13	-0.0121424	-0.178298	-0.201942	-0.194151	-0.181942	-0.1815	-0.281678	-0.34429	-0.360827	-0.350588	-0.356542	-0.224351	-0.17857	-0.256321	-0.373116	-0.246718	-0.161923			13.6839	0.132612	-0.0385791	-0.0628881	-0.00242938	0.551947	0.222284	0.0480325	-0.0283781	0.0169837	-0.370757	-0.20406	0.435405	0.455659	-0.338764	-0.34369
BELS14	-0.0983358	-0.238038	-0.236738	-0.207123	-0.200061	-0.202676	-0.276987	-0.325702	-0.339753	-0.333491	-0.328642	-0.219019	-0.194118	-0.249287	-0.297259	-0.240681	-0.216224			1.42066	-0.00546041	-0.125097	-0.0340941	0.0130683	0.36665	0.175876	0.0431405	-0.0184323	-0.0145384	-0.333565	-0.113693	0.284206	0.192435	-0.190333	-0.101612
BELS15	-0.373296	-0.391686	-0.470742	-0.653211	-0.658722	-0.662317	-0.663946	-0.658982	-0.677633	-0.679286	-0.692557	-0.480194	-0.261953	-0.447272	-0.475064	-0.588736	-0.614831			0.0492624	0.201837	0.387618	0.00843715	0.00545761	0.00246037	-0.00747646	0.0283022	0.00243883	0.0195366	-0.306636	-0.454485	0.70745	0.0621367	0.239278	0.0443231
BELS16	-0.115278	-0.181005	-0.179981	-0.16581	-0.162766	-0.170026	-0.202068	-0.227726	-0.231502	-0.223829	-0.216493	-0.176002	-0.154364	-0.193243	-0.253991	-0.218484	-0.184596			0.570162	-0.00565931	-0.078734	-0.0183602	0.0446025	0.188456	0.126974	0.0165817	-0.0331414	-0.0327754	-0.187033	-0.122941	0.251862	0.314365	-0.139798	-0.155105
BELS17	-0.310139	-0.311648	-0.197551	-0.153624	-0.145015	-0.145417	-0.288169	-0.378085	-0.400604	-0.761427	-0.749179	-0.553705	-0.141323	-0.186313	-0.395081	-0.500801	-0.0711013			0.00486504	-0.366108	-0.222358	-0.0560406	0.00277398	0.981677	0.312024	0.0595595	0.900698	-0.0160855	-0.260918	-0.744767	0.318347	1.12052	0.267592	-0.858025
BELS18	0.105012	0.0336531	0.0811679	0.13131	0.174838	0.176195	-0.0506924	-0.195515	-0.241305	-0.51817	-0.543518	-0.0848922	0.0588302	-0.0569761	-0.260742	0.0230473	0.210213			-0.679532	1.4119	0.617763	0.331485	0.00776148	-1.28771	2.85688	0.234201	1.14737	0.0489181	-0.84381	-1.693	-1.96848	3.57633	-1.08839	8.12094
BELS19	-0.0624101	-0.261168	-0.236589	-0.183197	-0.164706	-0.177659	-0.297825	-0.372587	-0.390492	-0.380064	-0.385793	-0.193289	-0.13799	-0.24712	-0.409349	-0.245706	-0.19492			3.18471	-0.0941119	-0.225677	-0.10093	0.0786412	0.676384	0.251028	0.0480557	-0.0267049	0.0150727	-0.498982	-0.286097	0.790862	0.656475	-0.399763	-0.206698
BELS20	0.296181	-0.0118903	0.0112736	0.140776	0.18187	0.179596	-0.0742994	-0.23749	-0.282447	-0.24537	-0.262942	0.0901116	0.180938	0.0237377	-0.276163	0.0377959	0.237055			-1.04015	-1.94813	11.4873	0.291909	-0.0125054	-1.4137	2.1964	0.189301	-0.131271	0.0716121	-1.34271	1.00793	-0.868808	-12.634	-1.13686	5.27198
BELS21	0.0917703	-0.175558	-0.129191	-0.0312568	-0.0159052	-0.0161407	-0.187375	-0.293221	-0.317552	-0.298468	-0.309642	-0.0740015	-0.0150942	-0.0912068	-0.288246	-0.193833	-0.115014			-2.91302	-0.264113	-0.758057	-0.491147	0.0148076	10.6089	0.564891	0.0829759	-0.0600953	0.0374382	-0.76101	-0.796028	5.04249	2.16036	-0.327544	-0.406634
BELS22	0.157361	-0.0517442	0.0323542	-0.115667	-0.288566	-0.266349	-0.229482	-0.312174	-0.398517	-0.558197	-0.561901	-0.408712	-0.406586	-0.330632	-0.495922	-0.550794	-0.376534			-1.32882	-1.62527	-4.57501	1.4948	-0.0769909	-0.138418	0.360343	0.276587	0.400687	0.00663419	-0.272626	-0.00520279	-0.186809	0.499921	0.110646	-0.316379
BELS23	-0.217984	-0.157042	-0.131788	-0.0442348	-0.0305959	-0.0295541	-0.181664	-0.281521	-0.305196	-0.292073	-0.299978	-0.158336	-0.00451792	-0.124986	-0.300676	-0.123969	-0.00207177			-0.279569	-0.16081	-0.664349	-0.30833	-0.0340497	5.14682	0.549679	0.0840998	-0.0429994	0.0270659	-0.472175	-0.971466	26.6644	1.40568	-0.587698	-0.983288
BELS24	0.00611799	-0.165389	-0.164316	-0.125145	-0.110992	-0.119864	-0.241666	-0.289924	-0.302836	-0.297918	-0.298764	-0.226837	-0.168937	-0.20571	-0.256146	-0.3192	-0.19298			-28.0333	-0.00648758	-0.23839	-0.113091	0.0799358	1.01616	0.199689	0.0445351	-0.016241	0.00284275	-0.240751	-0.255246	0.217671	0.245177	0.246167	-0.395428
BELS25	-0.0804482	-0.202452	-0.200605	-0.276856	-0.215278	-0.167847	-0.225661	-0.260047	-0.271284	-0.268687	-0.267169	-0.363666	-0.371056	-0.189967	-0.291427	-0.415338	-0.292359			1.51655	-0.00912077	0.380101	-0.222418	-0.220327	0.344446	0.15238	0.0432136	-0.00957298	-0.0056522	0.361186	0.0203208	-0.488038	0.534095	0.425188	-0.296094
BELS26	0.00850053	-0.221546	-0.171528	-0.0613639	-0.0501998	-0.0422061	-0.236133	-0.355578	-0.382706	-0.357189	-0.368045	-0.173933	-0.0352371	-0.18857	-0.38955	-0.181962	-0.0505341			-27.0626	-0.225769	-0.642251	-0.181933	-0.159238	4.59477	0.505834	0.0762955	-0.0666751	0.0303908	-0.527415	-0.797409	4.35145	1.06582	-0.532893	-0.722281
BELS27	-0.0667546	-0.261656	-0.2193	-0.175491	-0.167407	-0.164711	-0.296843	-0.376753	-0.396315	-0.383878	-0.391029	-0.205518	-0.172991	-0.266692	-0.399856	-0.25978	-0.172974			2.91967	-0.161875	-0.19977	-0.0460621	-0.0161085	0.802208	0.269198	0.0519231	-0.0313821	0.0186292	-0.474416	-0.15827	0.541648	0.499321	-0.350316	-0.334152
BELS28	0.140475	-0.147156	-0.0800996	0.00918196	0.025096	0.0258413	-0.20156	-0.335046	-0.364903	-0.334406	-0.347609	0.00470328	0.0465152	-0.0763703	-0.356258	-0.0969377	0.0854453			-2.04756	-0.455683	-1.11463	1.73318	0.0296996	-8.79993	0.662261	0.0891138	-0.0835761	0.0394828	-1.01353	8.88994	-2.64184	3.66487	-0.7279	-1.88145
BELS29	0.0809812	0.0218445	0.0791508	0.120109	0.142213	0.153236	-0.0396273	-0.175202	-0.207855	-0.466014	-0.502019	0.00908088	0.12822	0.00270264	-0.220128	-0.0332241	0.064208			-0.730252	2.62337	0.517473	0.184027	0.0775131	-1.2586	3.42125	0.186373	1.24201	0.0772635	-1.01809	13.1198	-0.978922	-82.4494	-0.849069	-2.93257
BELS30	0.05123	-0.281808	-0.17514	-0.043297	-0.0207808	-0.00918318	-0.265583	-0.409103	-0.450423	-0.416844	-0.426182	-0.0299635	0.0408269	-0.140189	-0.459329	-0.19156	0.0503424			-6.50085	-0.378516	-0.752786	-0.52004	-0.558094	27.9206	0.540394	0.101001	-0.0745488	0.0224017	-0.929693	-2.36255	-4.43374	2.2765	-0.582956	-1.2628
BELS31	-0.00714133	-0.235199	-0.194749	-0.139131	-0.123197	-0.113053	-0.277529	-0.377776	-0.404632	-0.387418	-0.395894	-0.169952	-0.127872	-0.229568	-0.409342	-0.222815	-0.0915582			31.9349	-0.171983	-0.285588	-0.114527	-0.082335	1.45485	0.361215	0.0710895	-0.0425424	0.0218787	-0.570714	-0.247601	0.795299	0.783098	-0.455674	-0.589085
BELS32	-0.00780891	-0.082713	-0.205586	-0.20727	-0.199671	-0.201891	-0.286709	-0.344305	-0.353197	-0.348459	-0.354128	-0.225292	-0.198343	-0.266075	-0.343606	-0.255487	-0.214082			9.59213	1.48553	0.00819463	-0.0366648	0.0111199	0.420118	0.200883	0.0258266	-0.0134144	0.0162695	-0.363813	-0.119618	0.341489	0.291389	-0.256452	-0.162064
BELS33	-0.167658	-0.202944	-0.270963	-0.27298	-0.13443	-0.178238	-0.275402	-0.377649	-0.490181	-0.478954	-0.454829	-0.14617	-0.290084	-0.208726	-0.626942	-0.498113	-0.379327			0.210469	0.335156	0.00744592	-0.507547	0.325883	0.545132	0.371268	0.29798	-0.0229051	-0.0503688	-0.678627	0.984568	-0.280463	2.00366	-0.205488	-0.238471
BELS34	0.00119019	-0.238315	-0.162225	-0.100125	-0.0837766	-0.0741575	-0.258669	-0.368707	-0.400671	-0.385125	-0.394995	-0.135122	-0.0877154	-0.207788	-0.409215	-0.224447	-0.0729709			-201.232	-0.319284	-0.3828	-0.163281	-0.114819	2.4881	0.425402	0.0866922	-0.0388002	0.0256276	-0.657916	-0.350841	1.36888	0.96939	-0.451517	-0.674886
BELS35																				#DIV/0!	#DIV/0!	#DIV/0!	#DIV/0!	#DIV/0!	#DIV/0!	#DIV/0!	#DIV/0!	#DIV/0!	#DIV/0!	#DIV/0!	#DIV/0!	#DIV/0!	#DIV/0!	#DIV/0!	#DIV/0!
BGRS1	-0.205123	-0.163524	-0.11919	-0.240772	-0.273654	-0.335363	-0.4138	-0.340882	-0.348399	-0.32251	-0.352798	-0.142228	-0.210667	-0.193724	-0.46126	-0.685506	-0.480436			-0.202803	-0.271117	1.02008	0.136566	0.2255	0.233889	-0.176217	0.022053	-0.0743078	0.0939125	-0.596856	0.481191	-0.0804283	1.38102	0.48616	-0.299152
BGRS2	-0.520678	-0.545091	-0.506837	-0.572912	-0.54793	-0.569267	-0.633383	-0.576633	-0.617002	-0.568082	-0.566337	-0.496784	-0.495116	-0.550112	-0.654153	-0.665408	-0.672408			0.0468869	-0.0701793	0.130367	-0.0436038	0.0389406	0.112629	-0.0895987	0.0700082	-0.0792877	-0.00307059	-0.122812	-0.00335849	0.111076	0.189128	0.0172051	0.0105198
BGRS3	0.0379452	0.0466382	0.0843086	-0.0507532	-0.121151	-0.178863	-0.303613	-0.195897	-0.211606	-0.166971	-0.227677	0.0908089	-0.0153199	0.0310732	-0.350899	-0.641525	-0.396768			0.229092	0.807715	-1.60199	1.38707	0.476356	0.697468	-0.354781	0.0801888	-0.210933	0.363574	-1.39885	-1.1687	-3.02829	-12.2927	0.82823	-0.381523
BGRS4	-0.494284	-0.471257	-0.245018	-0.295604	-0.492177	-0.486633	-0.48412	-0.447812	-0.393922	-0.429393	-0.47795	-0.24244	-0.306494	-0.251338	-0.397846	-0.365307	-0.378798			-0.0465871	-0.480076	0.20646	0.664987	-0.0112647	-0.00516288	-0.074999	-0.120339	0.0900435	0.113084	-0.49275	0.264203	-0.179956	0.582909	-0.0817883	0.0369317
BGRS5	-0.17104	-0.150302	-0.358896	-0.368013	-0.18356	-0.192023	-0.205885	-0.183252	-0.183226	-0.185913	-0.185278	-0.151452	-0.16178	-0.164784	-0.211839	-0.196581	-0.218586			-0.121251	1.38784	0.0254021	-0.501214	0.0461045	0.0721901	-0.109931	-0.000140354	0.0146661	-0.00341444	-0.182573	0.0681974	0.0185644	0.285557	-0.0720256	0.111939
BGRS6	-0.188039	-0.18647	-0.178289	-0.229977	-0.242064	-0.304754	-0.315487	-0.226002	-0.226912	-0.2223	-0.226701	-0.204435	-0.20213	-0.187304	-0.426552	-0.462347	-0.489159			-0.00834168	-0.0438739	0.289907	0.052558	0.258983	0.0352198	-0.283641	0.00402548	-0.0203261	0.019799	-0.0982192	-0.0112749	-0.0733459	1.27732	0.0839153	0.0579929
BGRS7	-0.375101	-0.366863	-0.329316	-0.38962	-0.390094	-0.406876	-0.44956	-0.427885	-0.43	-0.423014	-0.410681	-0.344598	-0.378981	-0.399389	-0.490239	-0.512017	-0.547877			-0.0219607	-0.102347	0.183121	0.00121662	0.0430191	0.104907	-0.048213	0.00494309	-0.0162462	-0.0291549	-0.160913	0.0997772	0.053852	0.227472	0.044423	0.0700364
BGRS8	-0.878582	-0.877583	-0.836011	-0.875888	-0.868057	-0.89403	-0.925833	-0.931738	-0.939123	-0.928284	-0.936286	-0.860139	-0.884154	-0.846981	-0.684423	-0.729111	-0.720012			-0.001137	-0.047372	0.0476992	-0.00894	0.0299209	0.0355729	0.00637786	0.0079263	-0.0115426	0.00862116	-0.0813295	0.0279208	-0.0420438	-0.191926	0.0652921	-0.0124788
BGRS9	-0.615846	-0.599503	-0.526165	-0.583053	-0.580724	-0.602675	-0.669637	-0.653951	-0.652832	-0.634387	-0.743547	-0.630183	-0.701778	-0.698974	-0.728057	-0.715036	-0.735908			-0.0265373	-0.122331	0.108118	-0.00399344	0.0377993	0.111108	-0.0234239	-0.00171136	-0.0282536	0.172071	-0.152465	0.11361	-0.00399568	0.0416084	-0.0178845	0.0291896
BGRS10	-0.266162	-0.253153	-0.228599	-0.287814	-0.321778	-0.387377	-0.403901	-0.403689	-0.535508	-0.311579	-0.542864	-0.280993	-0.399899	-0.41373	-0.484208	-0.404112	-0.404998			-0.0488776	-0.0969934	0.259036	0.118008	0.203862	0.0426569	-0.00052556	0.326536	-0.418162	0.7423	-0.482387	0.423163	0.0345858	0.170346	-0.165416	0.00219309
BGRS11	-0.610771	-0.580716	-0.45288	-0.473852	-0.469801	-0.480857	-0.527292	-0.59985	-0.602167	-0.590414	-0.660446	-0.529352	-0.648521	-0.593294	-0.595357	-0.611209	-0.629652			-0.049208	-0.220136	0.0463082	-0.00855031	0.0235341	0.0965672	0.137604	0.00386416	-0.0195178	0.118614	-0.198492	0.225121	-0.0851583	0.00347828	0.0266258	0.0301743
BGRS12	-0.797254	-0.745694	-0.650567	-0.726234	-0.833739	-0.732336	-0.825758	-0.811947	-0.782383	-0.770598	-0.863738	-0.785327	-0.744925	-0.721082	-0.743201	-0.734626	-0.709163			-0.0646722	-0.127568	0.11631	0.14803	-0.121625	0.127567	-0.0167245	-0.0364114	-0.0150626	0.120867	-0.0907809	-0.0514458	-0.0320077	0.0306743	-0.011537	-0.0346616
BGRS13	-0.613118	-0.524871	-0.474303	-0.516154	-0.593138	-0.546128	-0.603937	-0.60623	-0.588689	-0.569004	-0.546052	-0.287692	-0.48428	-0.496238	-0.541864	-0.514988	-0.542764			-0.143932	-0.0963442	0.0882372	0.149149	-0.0792564	0.105853	0.00379664	-0.0289347	-0.0334389	-0.0403369	-0.473143	0.68333	0.0246925	0.0919432	-0.0495996	0.0539363
BGRS14	-0.456833	-0.401886	-0.383855	-0.436397	-0.483317	-0.456339	-0.489796	-0.505969	-0.497112	-0.490192	-0.419927	-0.298346	-0.360782	-0.338792	-0.417709	-0.401313	-0.45654			-0.120278	-0.044867	0.136881	0.107517	-0.055818	0.073316	0.0330201	-0.0175067	-0.0139201	-0.143341	-0.28953	0.209275	-0.0609516	0.232937	-0.0392529	0.137616
BGRS15	-0.250803	-0.224238	-0.215172	-0.294698	-0.311358	-0.334399	-0.386934	-0.327263	-0.332223	-0.324089	-0.379442	-0.221549	-0.426401	-0.22882	-0.44252	-0.453483	-0.455805			-0.105922	-0.0404306	0.369595	0.056531	0.0740025	0.157105	-0.154217	0.015157	-0.0244831	0.170795	-0.416119	0.924637	-0.463369	0.933922	0.0247735	0.00511996
BGRS16	-0.239475	-0.123172	-0.143866	-0.202559	-0.181261	-0.193434	-0.234834	-0.173447	-0.171687	-0.199033	-0.180344	-0.170049	-0.202793	-0.196558	-0.329859	-0.326405	-0.340898			-0.485658	0.168012	0.407963	-0.10514	0.0671534	0.214027	-0.261407	-0.010148	0.159283	-0.0938997	-0.0570877	0.192557	-0.0307434	0.678175	-0.0104734	0.0444026
BGRS17	-0.786454	-0.777439	-0.735569	-0.785521	-0.744707	-0.799511	-0.84847	-0.854129	-0.858477	-0.834192	-0.854122	-0.750865	-0.795094	-0.800198	-0.885281	-0.875582	-0.86786			-0.011463	-0.0538566	0.067909	-0.051957	0.0735917	0.0612358	0.00666949	0.00509006	-0.0282884	0.023892	-0.120893	0.0589035	0.00641977	0.106327	-0.0109562	-0.00881907
BGRS18	-0.309773	-0.0295958	0.222315	-0.0885669	-0.33966	-0.202231	-0.359392	-0.331296	-0.28161	-0.270835	-0.283534	-0.0272301	-0.152613	-0.0414696	-0.263236	-0.375184	-0.359943			-0.90446	-8.51171	-1.39838	2.83506	-0.404606	0.777133	-0.0781763	-0.149974	-0.0382642	0.0468889	-0.903962	4.60457	-0.728269	5.34768	0.425278	-0.0406225
BGRS19	-0.509456	-0.493726	-0.49608	-0.52224	-0.502158	-0.524033	-0.567349	-0.584076	-0.585086	-0.544409	-0.552701	-0.484805	-0.512822	-0.44246	-0.636721	-0.649176	-0.659008			-0.0308765	0.00476859	0.0527323	-0.0384529	0.0435622	0.0826586	0.0294822	0.00172992	-0.0695231	0.0152314	-0.122845	0.057791	-0.137205	0.439045	0.0195612	0.0151461
BGRS20	-0.275278	-0.295645	-0.307364	-0.409627	-0.425791	-0.509296	-0.579948	-0.476397	-0.487164	-0.451857	-0.500627	-0.201904	-0.291691	-0.248952	-0.579654	-0.592768	-0.580158			0.0739875	0.0396372	0.332712	0.0394597	0.196119	0.138724	-0.178552	0.022601	-0.0724746	0.107933	-0.596698	0.444699	-0.14652	1.32837	0.0226244	-0.0212743
BGRS21	-0.264745	-0.181335	-0.0886015	-0.151599	-0.260732	-0.30748	-0.347817	-0.24224	-0.21206	-0.20615	-0.25885	-0.0668159	-0.135033	-0.107494	-0.341022	-0.402304	-0.406955			-0.31506	-0.511392	0.711016	0.719886	0.179294	0.131184	-0.303542	-0.124584	-0.0278693	0.255637	-0.741874	1.02097	-0.20394	2.17247	0.1797	0.0115621
BGRS22	-0.276854	-0.196923	-0.112731	-0.19563	-0.256104	-0.33521	-0.382138	-0.188	-0.211714	-0.189123	-0.177928	-0.104404	-0.114839	-0.187489	-0.344967	-0.384771	-0.37706			-0.288714	-0.427536	0.735369	0.309123	0.308883	0.139997	-0.508031	0.126136	-0.106705	-0.059192	-0.413224	0.0999518	0.632622	0.839929	0.115386	-0.020041
BGRS23	-0.626963	-0.644361	-0.556272	-0.613561	-0.644545	-0.666787	-0.716458	-0.71805	-0.730793	-0.713531	-0.704208	-0.427257	-0.520533	-0.31816	-0.357951	-0.482766	-0.38853			0.0277494	-0.136708	0.102987	0.0504993	0.0345082	0.0744929	0.0022223	0.0177459	-0.0236197	-0.0130664	-0.39328	0.218313	-0.388779	0.125064	0.348694	-0.195201
BGRS24	-0.198688	-0.23469	-0.208721	-0.196554	-0.192469	-0.220405	-0.175312	-0.204762	-0.216535	-0.209266	-0.206587	-0.106732	-0.145573	-0.12434	-0.141444	-0.174792	-0.168937			0.181203	-0.110656	-0.058292	-0.0207848	0.145148	-0.204592	0.167987	0.0574986	-0.03357	-0.012803	-0.483355	0.363912	-0.145862	0.13756	0.235768	-0.0334956
BGRS25	-0.49571	-0.458419	-0.37424	-0.421944	-0.440469	-0.45083	-0.431482	-0.503137	-0.530981	-0.505942	-0.452155	-0.156962	-0.316172	-0.17654	-0.283596	-0.340647	-0.30358			-0.075227	-0.183629	0.127469	0.0439039	0.023524	-0.042918	0.166068	0.0553414	-0.0471559	-0.106311	-0.652858	1.01432	-0.441632	0.60641	0.201168	-0.108814
BGRS26	-0.285358	-0.27274	-0.186937	-0.301275	-0.372045	-0.380386	-0.418359	-0.41402	-0.423336	-0.406428	-0.410134	-0.207267	-0.196891	-0.0671696	-0.228302	-0.29084	-0.273426			-0.044218	-0.314598	0.611639	0.234904	0.0224184	0.0998281	-0.0103704	0.0225005	-0.0399392	0.00911805	-0.494637	-0.050059	-0.658849	2.39889	0.273929	-0.0598752
BGRS27	-0.208037	-0.189987	-0.050317	-0.171721	-0.288167	-0.219553	-0.273476	-0.263975	-0.241324	-0.242898	-0.253289	-0.150629	-0.189829	-0.157232	-0.286695	-0.355796	-0.364949			-0.0867623	-0.735156	2.41279	0.678105	-0.238105	0.245604	-0.0347399	-0.08581	0.00652269	0.0427801	-0.405306	0.260239	-0.171718	0.823389	0.241025	0.0257244
BGRS28	-0.270713	-0.190967	-0.0726041	-0.156468	-0.234993	-0.254535	-0.321486	-0.197537	-0.207644	-0.175565	-0.209362	-0.0741791	-0.104299	-0.115027	-0.296558	-0.355092	-0.350187			-0.294579	-0.619807	1.15508	0.501862	0.08316	0.263034	-0.385551	0.0511646	-0.154491	0.192508	-0.64569	0.406042	0.102861	1.57815	0.197377	-0.0138131
BGRS29	-0.307722	-0.0264687	0.169212	-0.099325	-0.279574	-0.186252	-0.294546	-0.276335	-0.233699	-0.237071	-0.251194	0.112504	-0.110081	-0.0524745	-0.217412	-0.289924	-0.303471			-0.913985	-7.39291	-1.58699	1.81474	-0.3338	0.581438	-0.0618268	-0.154292	0.0144264	0.0595736	-1.44788	-1.97846	-0.523311	3.14319	0.333524	0.0467237
BGRS30	-0.267736	-0.101501	-0.0434622	-0.175434	-0.231871	-0.329017	-0.414744	-0.211297	-0.227722	-0.179869	-0.259879	0.0963935	-0.0577117	-0.064901	-0.395567	-0.455539	-0.451544			-0.620891	-0.571806	3.03648	0.321699	0.418966	0.260553	-0.490536	0.0777335	-0.210139	0.444827	-1.37092	-1.59871	0.124571	5.09493	0.151612	-0.00877047
BGRS31	-0.363231	-0.365635	-0.397702	-0.456539	-0.45653	-0.512325	-0.548546	-0.442686	-0.477227	-0.467141	-0.482174	-0.295856	-0.322382	-0.258275	-0.496377	-0.53448	-0.512604			0.00661691	0.0877024	0.147944	-1.96648e-05	0.122216	0.0706979	-0.192983	0.0780261	-0.0211332	0.0321794	-0.386413	0.0896602	-0.198854	0.921893	0.0767615	-0.0409293
BGRS32	-0.271405	-0.223756	-0.164525	-0.220706	-0.253788	-0.216744	-0.213887	-0.254861	-0.232426	-0.237829	-0.25548	-0.149166	-0.209068	-0.226379	-0.253716	-0.259527	-0.260694			-0.175565	-0.264713	0.341477	0.149888	-0.145962	-0.0131819	0.191567	-0.0880256	0.0232458	0.074215	-0.416134	0.401577	0.0828044	0.120758	0.0229012	0.00449888
BGRS33	-0.239293	-0.243303	-0.297053	-0.391656	-0.43594	-0.471069	-0.540128	-0.392025	-0.397526	-0.387806	-0.43314	-0.184904	-0.226224	-0.198714	-0.451756	-0.519787	-0.515586			0.0167562	0.220918	0.318474	0.113069	0.0805815	0.1466	-0.2742	0.0140333	-0.0244514	0.116897	-0.573109	0.22347	-0.121603	1.27339	0.150591	-0.00808162
BGRS34	-0.318471	-0.207471	-0.0794281	-0.188717	-0.300243	-0.240827	-0.269921	-0.246198	-0.20238	-0.212674	-0.236566	-0.0973046	-0.115395	-0.167295	-0.287118	-0.340519	-0.329236			-0.348539	-0.617162	1.37595	0.590972	-0.197894	0.120807	-0.0878889	-0.177976	0.0508643	0.112339	-0.588678	0.18592	0.449752	0.716242	0.18599	-0.0331351
BGRS35																				#DIV/0!	#DIV/0!	#DIV/0!	#DIV/0!	#DIV/0!	#DIV/0!	#DIV/0!	#DIV/0!	#DIV/0!	#DIV/0!	#DIV/0!	#DIV/0!	#DIV/0!	#DIV/0!	#DIV/0!	#DIV/0!
BRAS1	0.161672	0.178756	0.229529	0.272552	-0.1473	0.190014	0.119677	0.151318	-0.0816841	0.0499344	0.0749335	0.15446	0.0601563	-0.0794607	-0.135819	-0.19098	-0.18126			0.105669	0.284038	0.187441	-1.54045	-2.28998	-0.370165	0.264381	-1.53982	-1.61131	0.50064	1.0613	-0.610539	-2.3209	0.709257	0.406141	-0.0508959
BRAS2	0.208081	0.189781	0.271339	0.283063	-0.129264	0.16459	0.127846	0.181298	0.0629182	0.198399	0.239992	0.316229	0.245803	0.155222	0.131351	0.0876568	0.132198			-0.0879438	0.429746	0.0432073	-1.45666	-2.27328	-0.223244	0.418096	-0.652958	2.15328	0.209643	0.317666	-0.222707	-0.368509	-0.153788	-0.332651	0.508128
BRAS3	0.524309	0.538964	0.582321	0.584274	0.334285	0.517714	0.46841	0.485907	0.405374	0.49403	0.498417	0.557071	0.475816	0.459161	0.378254	0.398167	0.446678			0.0279498	0.0804458	0.00335384	-0.427862	0.548718	-0.0952346	0.0373543	-0.165737	0.218701	0.00888082	0.117679	-0.14586	-0.0350044	-0.176206	0.0526456	0.121835
BRAS4	0.0770922	0.0784597	0.135385	0.145453	-0.00964774	0.0508561	-0.00428184	0.0288158	-0.0887428	-0.0246175	-0.00303332	0.0246212	-0.0396943	-0.181234	-0.427906	-0.262477	-0.0603856			0.0177392	0.72554	0.0743644	-1.06633	-6.2713	-1.0842	-7.72976	-4.07966	-0.722597	-0.876782	-9.11693	-2.6122	3.56574	1.36107	-0.386601	-0.76994
BRAS5	0.0139089	0.00749642	0.0460541	0.0675051	-0.117193	-0.00434227	-0.0462005	-0.0179363	-0.111792	-0.0680891	-0.0598294	-0.040408	-0.0842661	-0.118344	-0.0965522	-0.108437	-0.0884428			-0.461035	5.14347	0.465778	-2.73606	-0.962948	9.63971	-0.611772	5.23273	-0.390931	-0.121307	-0.324613	1.08538	0.404409	-0.18414	0.123096	-0.184388
BRAS6	-0.0175437	-0.0138329	0.00836713	0.0320468	-0.130659	-0.0361396	-0.0682591	-0.0503032	-0.128698	-0.0937559	-0.0860674	-0.0573213	-0.0933854	-0.147521	-0.162939	-0.17153	-0.174808			-0.211513	-1.60487	2.83008	-5.07714	-0.723406	0.888762	-0.263055	1.55844	-0.271504	-0.0820052	-0.333995	0.629157	0.579703	0.104514	0.0527222	0.0191139
BRAS7	0.145125	0.146818	0.238294	0.222178	-0.0575722	0.153065	0.0864807	0.128943	-0.00125383	0.0635507	0.103245	0.241362	0.200136	0.154348	0.129718	-0.03034	-0.00147818			0.0116614	0.623063	-0.0676325	-1.25913	-3.65867	-0.435008	0.490997	-1.00972	-51.6853	0.624604	1.33777	-0.170807	-0.228782	-0.159579	-1.23389	-0.951279
BRAS8	-0.353118	-0.351564	-0.261239	-0.324103	-0.610241	-0.481275	-0.571554	-0.57734	-0.634716	-0.60732	-0.539801	-0.365431	-0.471011	-0.637918	-0.561135	-0.617619	-0.641899			-0.00440202	-0.256922	0.240638	0.88286	-0.211337	0.187583	0.0101237	0.09938	-0.0431628	-0.111175	-0.323027	0.288919	0.35436	-0.120365	0.10066	0.039312
BRAS9	0.0745613	0.0890517	0.171602	0.219796	-0.328816	0.080919	-0.00500618	0.0405426	-0.247633	-0.108479	-0.0678722	0.040703	-0.0467927	-0.235496	-0.228582	-0.36827	-0.362713			0.194342	0.926993	0.280847	-2.49601	-1.24609	-1.06187	-9.09851	-7.10798	-0.561937	-0.374328	-1.5997	-2.14961	4.03275	-0.0293595	0.611108	-0.0150896
BRAS10	0.0143549	0.0215848	0.0933933	0.124988	-0.220186	0.0061513	-0.0552257	-0.0244576	-0.191251	-0.116617	-0.0896332	-0.0415313	-0.0995484	-0.204665	-0.195036	-0.270248	-0.269878			0.503655	3.3268	0.338296	-2.76166	-1.02794	-9.97789	-0.557134	6.81969	-0.39024	-0.231389	-0.536652	1.39695	1.05594	-0.0470479	0.38563	-0.00136945
BRAS11	0.114661	0.120508	0.168794	0.160413	-0.0915193	0.0760643	0.0507624	0.0837448	-0.0472026	0.0894189	0.104121	0.0650133	0.00841628	-0.063371	-0.0642394	-0.105802	-0.0798592			0.0509852	0.400694	-0.0496517	-1.57052	-1.83113	-0.332638	0.649739	-1.56365	-2.89436	0.164418	-0.375599	-0.870545	-8.52957	0.0137041	0.646991	-0.2452
BRAS12	0.0461118	0.127008	0.266535	0.368565	-0.25125	0.217265	0.0692679	0.114473	0.135279	0.258976	0.207007	0.276786	0.222372	0.122548	0.151474	0.101194	0.126692			1.75434	1.09858	0.382801	-1.6817	-1.86474	-0.681183	0.65261	0.181756	0.914386	-0.20067	0.337085	-0.196593	-0.448903	0.236032	-0.331935	0.251966
BRAS13	0.0298854	0.09362	0.222187	0.325898	-0.181261	0.148928	0.0491863	0.0859916	0.121149	0.166549	0.140824	0.205012	0.137355	0.0534116	0.0317211	0.00074634	0.0549197			2.13263	1.37329	0.466769	-1.55619	-1.82162	-0.669731	0.748283	0.408851	0.374738	-0.154458	0.455805	-0.330017	-0.611141	-0.406102	-0.976472	72.5853
BRAS14	0.127856	0.150086	0.278333	0.230022	-0.244631	0.0315487	-0.121633	-0.152095	-0.0460419	0.0471319	0.0593623	-0.273182	-0.375746	-0.537457	-0.652573	-0.622556	-0.505034			0.173863	0.854496	-0.173572	-2.06351	-1.12896	-4.8554	0.250445	-0.697283	-2.02368	0.259493	-5.60195	0.37544	0.430373	0.214187	-0.0459979	-0.188773
BRAS15	0.317735	0.368337	0.451914	0.40938	-0.265739	0.315848	0.268793	0.202464	0.117263	0.276628	0.310603	0.347233	0.214566	0.222183	0.147606	0.159075	0.250089			0.159259	0.226905	-0.094119	-1.64913	-2.18856	-0.148979	-0.246767	-0.420822	1.35905	0.122817	0.117931	-0.382069	0.0355008	-0.335655	0.0776983	0.572148
BRAS16	0.0147151	0.0629528	0.199814	0.142411	-0.149847	0.00606355	-0.0587848	-0.0385593	-0.077072	0.099128	0.0772775	0.114266	0.0504973	-0.0265986	-0.0989147	-0.0985788	-0.0523647			3.2781	2.17403	-0.287284	-2.05222	-1.04046	-10.6948	-0.344061	0.998794	-2.28617	-0.220427	0.478642	-0.558071	-1.52673	2.71879	-0.00339576	-0.468804
BRAS17	0.312454	0.308512	0.35949	0.379894	-0.191871	0.262149	0.211635	0.262674	0.104473	0.193559	0.213907	0.289114	0.205709	-0.00505734	0.0335237	-0.0472419	-0.0237186			-0.0126182	0.16524	0.0567589	-1.50506	-2.36628	-0.192693	0.241165	-0.602269	0.852714	0.105126	0.351584	-0.288485	-1.02458	-7.62872	-2.40921	-0.497933
BRAS18	0.259153	0.331045	0.533624	0.589725	0.273922	0.538391	0.488989	0.520298	0.34908	0.384066	0.386657	0.413788	0.361468	0.319645	0.192861	0.141471	0.206099			0.27741	0.611938	0.105131	-0.535508	0.965486	-0.0917582	0.0640294	-0.329077	0.100222	0.00674703	0.0701689	-0.126442	-0.115703	-0.39664	-0.266463	0.45683
BRAS19	0.187635	0.204496	0.343953	0.414904	-0.0566266	0.374561	0.288053	0.317212	0.231509	0.27467	0.287397	0.334375	0.315089	0.238325	0.174336	0.135449	0.156219			0.0898594	0.681958	0.206281	-1.13648	-7.61457	-0.230957	0.101226	-0.270175	0.186431	0.0463375	0.16346	-0.0576781	-0.243625	-0.268498	-0.223059	0.153342
BRAS20	0.157495	0.143996	0.240565	0.245826	0.0270305	0.17346	0.0971452	0.152231	0.00670747	0.0989938	0.153965	0.273847	0.200228	0.104474	0.124859	0.166055	0.151751			-0.0857098	0.670632	0.0218688	-0.890042	5.41718	-0.439955	0.567047	-0.955939	13.7587	0.555305	0.778629	-0.268835	-0.478223	0.195123	0.329934	-0.0861359
BRAS21	0.183824	0.173437	0.272919	0.27991	0.0836045	0.223187	0.147475	0.197061	0.00698905	0.123924	0.157934	0.265973	0.18537	0.071768	0.0942299	0.0958819	0.0647658			-0.056506	0.573591	0.0256175	-0.701317	1.66955	-0.339229	0.33623	-0.964534	16.7312	0.274441	0.68408	-0.303049	-0.61284	0.31298	0.0175313	-0.324526
BRAS22	0.328665	0.3222	0.399186	0.412477	0.141906	0.341904	0.280234	0.301075	0.188375	0.26772	0.310697	0.363928	0.27753	0.130251	0.0443444	0.102135	0.154669			-0.0196724	0.238939	0.0332952	-0.655965	1.40937	-0.180374	0.0743721	-0.374326	0.421206	0.160531	0.171327	-0.237404	-0.530679	-0.659546	1.30322	0.514351
BRAS23	-0.273128	-0.265984	-0.147901	-0.160971	-0.444368	-0.321302	-0.401955	-0.378242	-0.500243	-0.439482	-0.394995	-0.301238	-0.386549	-0.520233	-0.457276	-0.516232	-0.53029			-0.026153	-0.44395	0.0883721	1.76055	-0.276946	0.251019	-0.0589946	0.322549	-0.121464	-0.101225	-0.237362	0.283199	0.34584	-0.121016	0.128929	0.0272307
BRAS24	0.0867741	0.094677	0.114545	0.133498	-0.0970202	0.131591	0.0823004	0.108183	0.0719598	0.0626383	0.0627813	0.0984517	0.066601	0.0651561	0.0189317	-0.0307147	-0.013302			0.0910738	0.209855	0.165456	-1.72676	-2.35632	-0.374572	0.314493	-0.334834	-0.129537	0.00228257	0.56817	-0.323516	-0.0216946	-0.709441	-2.6224	-0.566917
BRAS25	-0.275506	-0.27749	-0.234562	-0.222885	-0.36799	-0.333341	-0.370707	-0.360023	-0.396487	-0.380809	-0.353229	-0.266091	-0.318806	-0.302232	-0.28777	-0.348912	-0.380227			0.00720134	-0.154701	-0.0497801	0.651029	-0.0941565	0.112094	-0.0288195	0.101282	-0.0395415	-0.0724247	-0.246691	0.19811	-0.0519879	-0.0478502	0.212467	0.0897504
BRAS26	0.270916	0.275614	0.312976	0.32973	-0.141276	0.299556	0.231036	0.272398	0.237405	0.2005	0.233085	0.350097	0.314603	0.292794	0.218329	0.120225	0.139915			0.0173412	0.13556	0.0535286	-1.42846	-3.12036	-0.228737	0.179027	-0.128463	-0.155452	0.162521	0.502012	-0.101381	-0.0693249	-0.254326	-0.449341	0.163778
BRAS27	0.393071	0.397624	0.44294	0.460648	-0.192848	0.44137	0.363332	0.405874	0.464266	0.425501	0.418599	0.545236	0.523738	0.491747	0.420469	0.363638	0.378239			0.0115827	0.113967	0.0399805	-1.41864	-3.2887	-0.176809	0.117089	0.143867	-0.0834965	-0.0162204	0.302524	-0.0394274	-0.0610821	-0.144949	-0.13516	0.0401515
BRAS28	0.527497	0.53432	0.562305	0.571774	0.100358	0.546159	0.468495	0.520675	0.443134	0.434895	0.449861	0.54107	0.5226	0.499552	0.413243	0.413326	0.435468			0.0129357	0.0523749	0.0168399	-0.824481	4.44213	-0.1422	0.111378	-0.148923	-0.0185942	0.0344138	0.202749	-0.0341357	-0.0441037	-0.172772	0.000200151	0.0535706
BRAS29	0.311142	0.30979	0.358175	0.369005	-0.0507185	0.37233	0.294348	0.347933	0.329246	0.30809	0.294761	0.361506	0.335969	0.313083	0.218523	0.183229	0.20214			-0.00434352	0.156186	0.0302377	-1.13745	-8.34111	-0.209443	0.182046	-0.0537067	-0.0642577	-0.0432624	0.226436	-0.0706401	-0.0681181	-0.302029	-0.161511	0.10321
BRAS30	0.449129	0.446338	0.487833	0.499498	-0.14238	0.467996	0.372533	0.421425	0.396321	0.356334	0.409493	0.514724	0.497897	0.492056	0.411116	0.347259	0.368347			-0.00621232	0.0929658	0.0239132	-1.28505	-4.28695	-0.203982	0.131242	-0.0595699	-0.100897	0.149185	0.256977	-0.0326914	-0.0117312	-0.164492	-0.155327	0.0607283
BRAS31	0.56632	0.567645	0.636118	0.652412	0.26768	0.621604	0.568123	0.604382	0.498926	0.477085	0.458001	0.518543	0.496265	0.483564	0.396767	0.344834	0.351083			0.00233984	0.120626	0.0256151	-0.589708	1.32219	-0.0860375	0.0638235	-0.174487	-0.0437755	-0.0400008	0.132188	-0.0429622	-0.0255944	-0.179493	-0.130892	0.0181224
BRAS32	0.368542	0.369153	0.410557	0.419475	-0.104328	0.408356	0.339846	0.389136	0.301438	0.269319	0.284489	0.392101	0.363388	0.337335	0.250405	0.190884	0.201952			0.00165613	0.112159	0.0217217	-1.24871	-4.91415	-0.167771	0.145037	-0.225366	-0.106553	0.0563263	0.378264	-0.0732286	-0.0716951	-0.257697	-0.237698	0.0579836
BRAS33	0.217446	0.208404	0.341754	0.316183	-0.00477512	0.283991	0.247695	0.302038	0.193033	0.219419	0.216282	0.334456	0.304064	0.276241	0.18908	0.0816093	0.119174			-0.0415838	0.639865	-0.0748236	-1.0151	-60.4732	-0.127807	0.219391	-0.360897	0.136689	-0.0142972	0.546392	-0.0908683	-0.091504	-0.315525	-0.568388	0.460302
BRAS34	0.325343	0.322875	0.387716	0.39581	-0.08302	0.338662	0.241831	0.293831	0.252284	0.303826	0.328363	0.38732	0.360349	0.374866	0.33076	0.278511	0.278274			-0.0075843	0.200823	0.0208773	-1.20975	-5.07928	-0.285921	0.215024	-0.141397	0.204302	0.080759	0.179548	-0.069633	0.0402845	-0.117657	-0.157968	-0.00084832
BRAS35																				#DIV/0!	#DIV/0!	#DIV/0!	#DIV/0!	#DIV/0!	#DIV/0!	#DIV/0!	#DIV/0!	#DIV/0!	#DIV/0!	#DIV/0!	#DIV/0!	#DIV/0!	#DIV/0!	#DIV/0!	#DIV/0!
CANS1	0.0183698	0.0550563	0.0284084	0.120185	-0.0697487	-0.0751925	-0.0631386	-0.132084	-0.124482	-0.0989911	0.0412978	0.219797	0.0763347	0.0359923	0.159221	0.0361293	0.0477705			1.99711	-0.484011	3.23062	-1.58034	0.0780489	-0.160307	1.09197	-0.0575545	-0.204777	-1.41719	4.32224	-0.652703	-0.528493	3.42375	-0.773087	0.322209
CANS2	0.295467	0.342386	0.310819	0.311351	0.311308	0.290728	0.299614	0.234462	0.238925	0.246248	0.229004	0.279477	0.108676	-0.133194	0.300486	0.0469246	0.0702106			0.158797	-0.0921976	0.00171289	-0.000137959	-0.0661083	0.0305634	-0.217454	0.0190351	0.0306537	-0.070029	0.220402	-0.611145	-2.22561	-3.256	-0.843838	0.496245
CANS3	0.330508	0.354092	0.347725	0.409129	0.309672	0.298693	0.319489	0.259751	0.351756	0.359944	0.348327	0.39806	0.216663	0.188144	0.298206	0.138422	0.134351			0.0713578	-0.0179824	0.17659	-0.243094	-0.0354554	0.0696233	-0.186978	0.354202	0.0232788	-0.0322741	0.142776	-0.455704	-0.131625	0.584987	-0.535819	-0.0294122
CANS4	-0.195766	-0.182633	-0.210921	-0.192626	-0.180966	-0.108044	-0.156946	-0.161739	-0.178372	-0.176004	-0.163512	-0.0500565	-0.0776123	-0.0813391	-0.0613121	-0.0872447	-0.0878213			-0.0670833	0.154892	-0.0867411	-0.0605306	-0.402958	0.452604	0.0305407	0.102838	-0.0132716	-0.0709811	-0.693865	0.550493	0.048018	-0.246216	0.42296	0.00660849
CANS5	-0.0418852	-0.0421829	-0.0656981	-0.0644525	-0.0460962	-0.0482507	-0.0461562	-0.0497483	-0.043878	-0.0440905	-0.0457834	-0.0467197	-0.0588873	-0.0557032	-0.0506188	-0.0575983	-0.0570978			0.00710881	0.557458	-0.0189599	-0.284803	0.0467388	-0.0434078	0.0778234	-0.118	0.00484439	0.0383962	0.0204511	0.260438	-0.0540708	-0.0912769	0.137884	-0.00869038
CANS6	-0.195779	-0.10074	-0.165435	-0.158186	-0.16122	-0.193548	-0.263352	-0.279466	-0.285797	-0.262906	-0.196755	-0.0697725	-0.100922	0.0451223	0.186831	0.0841653	0.0544179			-0.485438	0.64219	-0.0438171	0.0191841	0.20052	0.360652	0.0611884	0.0226554	-0.0800972	-0.251615	-0.645384	0.446438	-1.4471	3.14055	-0.549512	-0.35344
CANS7	-0.199965	-0.170777	-0.195265	-0.14599	-0.124109	-0.116099	-0.0971626	-0.152323	-0.153233	-0.162527	-0.098899	-0.0719909	-0.484157	-0.407133	-0.214754	-0.200068	-0.194094			-0.145965	0.14339	-0.25235	-0.149879	-0.0645372	-0.163108	0.567714	0.00597475	0.0606528	-0.391493	-0.272077	5.72526	-0.15909	-0.47252	-0.0683868	-0.0298577
CANS8	-0.24822	-0.500346	-0.192953	-0.243172	-0.363042	-0.414431	-0.312793	-0.496588	-0.369032	-0.322973	-0.43357	-0.222281	-0.307653	0.0571442	0.346868	0.126107	0.13535			1.01574	-0.614361	0.260264	0.492944	0.141552	-0.245247	0.587593	-0.256866	-0.124811	0.342436	-0.487324	0.384075	-1.18574	5.07005	-0.636442	0.0732959
CANS9	-0.499879	-0.496007	-0.5272	-0.518165	-0.506629	-0.515656	-0.50462	-0.527955	-0.542043	-0.552276	-0.521165	-0.490581	-0.543338	-0.537135	-0.44418	-0.437818	-0.466766			-0.00774405	0.0628878	-0.0171389	-0.0222625	0.0178184	-0.0214023	0.046242	0.0266841	0.0188784	-0.056331	-0.0586839	0.10754	-0.011417	-0.173058	-0.0143216	0.0661174
CANS10	-0.41544	-0.419679	-0.454411	-0.445203	-0.439929	-0.440911	-0.420293	-0.43656	-0.447108	-0.449113	-0.423666	-0.453498	-0.48068	-0.504781	-0.473137	-0.413831	-0.365154			0.0102034	0.0827578	-0.0202634	-0.0118452	0.00223262	-0.0467621	0.038703	0.0241608	0.00448507	-0.0566615	0.070414	0.0599396	0.0501391	-0.0626896	-0.125346	-0.117625
CANS11	-0.0886712	-0.0645582	-0.0411097	-0.0720917	-0.139041	-0.129725	-0.128295	-0.177743	-0.15811	-0.155989	-0.171773	-0.0664334	-0.076509	-0.108313	-0.154609	-0.111326	-0.155961			-0.271937	-0.363215	0.753643	0.928665	-0.0670013	-0.0110186	0.385423	-0.110459	-0.0134152	0.101185	-0.613249	0.151665	0.415696	0.427421	-0.27995	0.400942
CANS12	-0.333703	-0.427837	-0.387389	-0.382999	-0.269285	-0.273403	-0.253821	-0.281148	-0.258502	-0.272175	-0.215402	-0.378679	-0.44143	-0.581467	-0.524527	-0.490074	-0.610328			0.282087	-0.0945397	-0.0113332	-0.296904	0.0152917	-0.0716238	0.107664	-0.0805495	0.052893	-0.20859	0.758014	0.16571	0.317234	-0.0979248	-0.0656835	0.245378
CANS13	-0.362832	-0.336434	-0.358998	-0.347796	-0.278546	-0.312703	-0.22458	-0.297192	-0.317099	-0.296441	-0.270866	-0.171159	-0.236555	-0.221925	-0.167629	-0.161837	-0.188982			-0.0727555	0.0670691	-0.031205	-0.199112	0.122629	-0.281812	0.323323	0.0669856	-0.0651473	-0.0862746	-0.368102	0.382072	-0.0618436	-0.244658	-0.0345529	0.167728
CANS14	-0.489961	-0.48582	-0.517494	-0.490735	-0.455876	-0.452822	-0.429657	-0.447426	-0.461428	-0.475978	-0.459264	-0.362864	-0.385898	-0.428278	-0.189356	-0.174782	-0.33676			-0.00845182	0.0651971	-0.0517082	-0.0710341	-0.00669926	-0.0511581	0.0413567	0.0312955	0.0315321	-0.035116	-0.2099	0.0634785	0.109821	-0.557868	-0.0769643	0.926745
CANS15	-0.733912	-0.70317	-0.717867	-0.734087	-0.719116	-0.730363	-0.731122	-0.748218	-0.763212	-0.767303	-0.760681	-0.75206	-0.778663	-0.616913	-0.670842	-0.66249	-0.728714			-0.0418879	0.0209008	0.0225953	-0.0203941	0.0156401	0.00103935	0.0233834	0.0200394	0.00536006	-0.00863066	-0.0113327	0.0353734	-0.207728	0.0874182	-0.0124509	0.0999629
CANS16	-0.232168	-0.221713	-0.246099	-0.15821	-0.113513	-0.12782	0.0107792	-0.0716996	-0.11368	-0.156309	-0.0793109	0.030248	-0.35306	-0.309478	-0.0326748	-0.0537473	-0.118388			-0.0450327	0.109989	-0.357129	-0.282515	0.126034	-1.08433	-7.65165	0.585497	0.374993	-0.4926	-1.38138	-12.6722	-0.12344	-0.89442	0.644915	1.20267
CANS17	0.100527	0.141817	0.124135	0.118789	0.121512	0.0974061	0.102586	0.0720501	0.0120949	0.0101266	0.021483	0.0245393	-0.0408821	-0.141644	-0.102319	-0.179349	-0.171313			0.410743	-0.124681	-0.0430693	0.022928	-0.198386	0.053175	-0.297659	-0.832132	-0.162737	1.12144	0.142267	-2.66599	2.46468	-0.277632	0.752842	-0.0448077
CANS18	0.18376	0.187387	0.156412	0.143495	0.168055	0.148015	0.130631	0.0592275	0.0447988	0.0740822	0.133419	0.218881	0.138015	0.246234	0.241386	0.200723	0.149942			0.0197379	-0.165298	-0.0825855	0.171158	-0.119249	-0.117443	-0.546605	-0.243615	0.653664	0.800962	0.640551	-0.36945	0.784109	-0.0196905	-0.168458	-0.252987
CANS19	-0.177328	-0.0460703	0.0578289	-0.043079	-0.0461014	-0.0460617	-0.0581508	-0.157863	-0.188953	-0.161339	-0.107982	0.0217503	-0.0541071	-0.131425	-0.0475061	-0.0784255	-0.108403			-0.740198	-2.25523	-1.74494	0.0701601	-0.000860854	0.262453	1.71472	0.196944	-0.146145	-0.330712	-1.20142	-3.48765	1.42899	-0.638532	0.65085	0.38224
CANS20	0.332572	0.37409	0.362896	0.352014	0.351828	0.333397	0.340364	0.296761	0.224286	0.234455	0.262873	0.182785	0.0110449	-0.0504524	0.0557842	-0.174626	-0.169227			0.12484	-0.0299221	-0.029989	-0.000525786	-0.0523876	0.0208959	-0.128107	-0.24422	0.0453405	0.12121	-0.304664	-0.939574	-5.56793	-2.10568	-4.13038	-0.0309141
CANS21	0.274165	0.275216	0.258018	0.238635	0.24313	0.217772	0.223107	0.174307	0.14994	0.164067	0.196144	0.315753	0.277205	0.0411012	0.207963	0.052825	0.0560336			0.0038337	-0.062492	-0.0751213	0.018836	-0.104298	0.0244984	-0.21873	-0.139794	0.0942215	0.195511	0.609797	-0.122081	-0.85173	4.05978	-0.745988	0.0607387
CANS22	0.257149	0.267083	0.269747	0.255722	0.251869	0.237645	0.244784	0.21283	0.215762	0.227016	0.248209	0.279204	0.169336	-0.0105999	0.152334	-0.0251915	-0.00896174			0.0386301	0.00997513	-0.0519918	-0.015068	-0.0564741	0.0300423	-0.130539	0.0137728	0.0521599	0.0933539	0.124878	-0.393505	-1.0626	-15.3713	-1.16537	-0.644255
CANS23	-0.119196	-0.179976	-0.11679	-0.142559	-0.232643	-0.255798	-0.211992	-0.337455	-0.268862	-0.245926	-0.312916	-0.0223416	-0.0326732	0.0460018	0.130406	-0.04447	-0.0517025			0.509911	-0.351082	0.220648	0.631907	0.0995291	-0.171253	0.591831	-0.203265	-0.0853098	0.272402	-0.928602	0.462441	-2.40794	1.83481	-1.34101	0.162637
CANS24	-0.0716111	-0.0180655	-0.0829338	-0.102246	-0.131778	-0.135087	-0.126937	-0.169219	-0.154969	-0.153357	-0.167409	-0.0153934	-0.0668153	-0.0900964	-0.0512941	-0.105684	-0.108535			-0.747727	3.59072	0.232859	0.288841	0.0251038	-0.0603315	0.3331	-0.0842132	-0.0103973	0.0916269	-0.908049	3.34051	0.348438	-0.430675	1.06035	0.0269792
CANS25	-0.16339	-0.241094	-0.170696	-0.189999	-0.260054	-0.276937	-0.24311	-0.34144	-0.29121	-0.280286	-0.332252	-0.200165	-0.238267	-0.0913672	-0.0407775	-0.0995455	-0.101611			0.475579	-0.291994	0.113081	0.368716	0.0649191	-0.122144	0.404466	-0.147113	-0.0375124	0.185404	-0.397549	0.190348	-0.616534	-0.553696	1.44118	0.0207468
CANS26	0.069417	0.0944787	0.120298	0.0961632	0.0189304	0.0139725	0.0263395	-0.06602	-0.0581924	-0.0420886	-0.0831591	0.0971093	-0.0271987	-0.131913	-0.0362123	-0.185986	-0.181939			0.36103	0.273277	-0.200622	-0.803143	-0.261904	0.885105	-3.5065	-0.118564	-0.276733	0.975809	-2.16775	-1.28008	3.84997	-0.725484	4.13599	-0.021758
CANS27	0.162866	0.199728	0.19134	0.173491	0.160607	0.142088	0.144742	0.107762	0.0762239	0.0863108	0.104483	0.0620643	-0.0848458	-0.177106	-0.0910982	-0.225428	-0.224601			0.226338	-0.0419996	-0.0932853	-0.0742615	-0.115309	0.0186789	-0.255484	-0.292668	0.132333	0.210546	-0.405988	-2.36706	1.08739	-0.48563	1.47455	-0.00366724
CANS28	0.3739	0.413776	0.407063	0.383521	0.377865	0.357782	0.362911	0.324504	0.292664	0.304368	0.326718	0.224212	0.0961254	-0.0543277	0.0945894	-0.152344	-0.142191			0.106648	-0.0162238	-0.0578336	-0.0147458	-0.0531482	0.0143338	-0.10583	-0.098118	0.0399897	0.0734299	-0.313743	-0.571275	-1.56518	-2.74109	-2.61059	-0.0666482
CANS29	0.191141	0.196197	0.178125	0.138531	0.149152	0.127906	0.116928	0.05775	0.0823383	0.105678	0.153239	0.254858	0.193849	0.289789	0.228948	0.193584	0.138643			0.0264533	-0.0921104	-0.222283	0.0766649	-0.142441	-0.0858342	-0.506104	0.425772	0.283461	0.450059	0.663134	-0.239382	0.494919	-0.209949	-0.154465	-0.283811
CANS30	0.322007	0.371524	0.356572	0.336161	0.330709	0.308882	0.313421	0.260141	0.227919	0.24008	0.267657	0.134152	-0.100638	-0.218788	-0.0765829	-0.330965	-0.317528			0.153776	-0.0402443	-0.0572426	-0.0162191	-0.0660019	0.014696	-0.169994	-0.123864	0.0533547	0.114869	-0.498792	-1.75018	1.17401	-0.649968	3.32166	-0.0405988
CANS31	0.509959	0.511675	0.475124	0.499036	0.465267	0.435632	0.446067	0.408656	0.376315	0.380116	0.398901	0.43538	0.401552	0.326853	0.435957	0.312798	0.329486			0.0033648	-0.0714342	0.050328	-0.0676672	-0.063696	0.0239543	-0.0838678	-0.0791399	0.0101001	0.049419	0.0914486	-0.0776963	-0.186026	0.333801	-0.282503	0.0533509
CANS32	0.100553	0.103227	0.0597817	0.0526582	0.0552492	0.0147397	0.0314581	-0.0279394	-0.0765414	-0.0737252	-0.056918	-0.00309355	-0.0632438	-0.0218645	-0.0840864	-0.0873636	-0.124429			0.0265957	-0.420874	-0.119158	0.049204	-0.733215	1.13425	-1.88815	1.73955	-0.0367933	-0.227971	-0.945649	19.4438	-0.654282	2.84579	0.0389748	0.424261
CANS33	0.146228	0.214179	0.220621	0.200942	0.160511	0.157848	0.145966	0.072532	0.0810614	0.0821434	0.0889025	0.157695	0.0583901	-0.0306888	0.0348698	-0.130939	-0.143412			0.464697	0.0300779	-0.0891996	-0.201206	-0.0165897	-0.0752749	-0.503091	0.117595	0.0133482	0.0822832	0.773799	-0.629728	-1.52558	-2.13624	-4.75508	0.0952584
CANS34	0.234325	0.275127	0.266186	0.248121	0.2375	0.216983	0.219515	0.177479	0.137971	0.154534	0.173906	0.211329	0.0463363	-0.126695	0.00816548	-0.170108	-0.159301			0.174126	-0.0324972	-0.067865	-0.0428067	-0.0863854	0.0116677	-0.191497	-0.222607	0.120048	0.125359	0.215189	-0.780738	-3.73425	-1.06445	-21.8325	-0.0635267
CANS35																				#DIV/0!	#DIV/0!	#DIV/0!	#DIV/0!	#DIV/0!	#DIV/0!	#DIV/0!	#DIV/0!	#DIV/0!	#DIV/0!	#DIV/0!	#DIV/0!	#DIV/0!	#DIV/0!	#DIV/0!	#DIV/0!
SWIS1	0.0272057	0.0749428	0.0890364	0.077246	0.0620534	0.0306665	0.0334546	0.0260022	0.0186956	-0.0982283	-0.0380803	-0.173808	-0.200975	-0.193105	-0.205559	-0.16729	-0.206054			1.75467	0.188059	-0.132422	-0.196678	-0.505805	0.0909192	-0.222763	-0.280999	-6.2541	-0.612328	3.56426	0.156301	-0.0391583	0.0644914	-0.186168	0.231713
SWIS2	-0.0808446	-0.0751989	-0.0856773	-0.0858843	-0.0870417	-0.102695	-0.100367	-0.11114	-0.109691	-0.137198	-0.123453	-0.124089	-0.147175	-0.151529	-0.144756	-0.133779	-0.139763			-0.0698346	0.139343	0.00241595	0.0134769	0.179831	-0.022666	0.107335	-0.0130331	0.250762	-0.100184	0.00515817	0.186037	0.0295837	-0.044693	-0.0758347	0.0447359
SWIS3	0.296976	0.332734	0.338956	0.35007	0.344894	0.316293	0.324716	0.305236	0.286561	0.146609	0.19548	-0.104908	-0.113264	-0.114595	-0.183734	-0.118189	-0.220601			0.120408	0.0186994	0.0327889	-0.0147873	-0.0829263	0.0266318	-0.0599924	-0.0611823	-0.488386	0.333348	-1.53667	0.0796468	0.0117483	0.603339	-0.356739	0.866512
SWIS4	-0.304239	-0.279414	-0.285129	-0.252071	-0.218781	-0.103185	-0.166488	-0.128457	-0.108263	-0.137542	-0.193682	-0.379764	-0.143538	-0.268919	-0.127681	-0.124857	-0.118859			-0.0815997	0.0204545	-0.115941	-0.132063	-0.528367	0.613494	-0.228433	-0.157199	0.270438	0.408168	0.960762	-0.622033	0.873501	-0.525207	-0.0221167	-0.048043
SWIS5	-0.180294	-0.180637	-0.0587828	-0.0610943	-0.140337	-0.139437	-0.137903	-0.152821	-0.14289	-0.143091	-0.148574	-0.187687	-0.112004	-0.0830736	-0.0735132	-0.0732115	-0.0981852			0.00190023	-0.67458	0.0393212	1.29705	-0.00641224	-0.0110009	0.108177	-0.0649874	0.00141178	0.038319	0.263253	-0.403243	-0.258295	-0.115084	-0.00410408	0.341117
SWIS6	-0.074711	-0.0263245	-0.0213177	-0.0245845	-0.0119225	-0.0583674	-0.0496934	-0.0586453	-0.0664477	-0.153844	-0.111262	-0.20617	-0.229009	-0.21692	-0.212617	-0.182814	-0.19362			-0.647649	-0.190195	0.153245	-0.515042	3.89558	-0.148611	0.180143	0.133043	1.31527	-0.276785	0.853012	0.110776	-0.0527869	-0.0198385	-0.140174	0.0591124
SWIS7	-0.0380475	-0.0192519	-0.063783	-0.0244901	-0.0272373	-0.100526	-0.0989408	-0.12078	-0.115828	-0.206696	-0.173496	-0.241999	-0.257228	-0.246975	-0.233634	-0.199508	-0.218019			-0.494004	2.31308	-0.61604	0.112173	2.69076	-0.015772	0.220727	-0.0410001	0.784515	-0.160622	0.394836	0.0629323	-0.0398614	-0.0540177	-0.146067	0.0927844
SWIS8	-0.150571	-0.26715	-0.120624	-0.0655747	-0.0561594	-0.0894186	-0.338752	-0.137613	-0.0846789	-0.147644	-0.236571	-0.138962	-0.167771	-0.255017	-0.214369	-0.2297	-0.18274			0.774245	-0.548479	-0.456371	-0.143581	0.592227	2.78839	-0.593766	-0.384658	0.743572	0.602307	-0.412598	0.207313	0.520033	-0.159392	0.0715141	-0.20444
SWIS9	-0.673678	-0.635373	-0.583899	-0.670177	-0.658358	-0.690767	-0.631297	-0.636502	-0.732219	-0.73982	-0.725176	-0.716827	-0.765534	-0.749622	-0.689176	-0.709214	-0.690949			-0.0568593	-0.0810137	0.147762	-0.0176363	0.0492271	-0.0860924	0.00824507	0.15038	0.0103802	-0.0197941	-0.0115124	0.0679469	-0.0207854	-0.0806351	0.0290749	-0.0257529
SWIS10	-0.0606132	-0.00930188	-0.0126268	0.00788852	0.0150024	-0.038555	-0.034066	-0.0394362	-0.0499206	-0.156762	-0.106329	-0.210025	-0.230772	-0.196545	-0.181347	-0.164395	-0.164197			-0.846537	0.35745	-1.62474	0.901802	-3.56992	-0.116432	0.157641	0.265859	2.14022	-0.321716	0.975237	0.0987857	-0.148316	-0.0773246	-0.0934793	-0.00120417
SWIS11	-0.0919789	-0.0429777	-0.0371249	-0.03482	-0.023865	-0.0674261	-0.0636644	-0.0732401	-0.0801485	-0.159762	-0.12048	-0.199056	-0.218919	-0.217812	-0.208128	-0.179259	-0.199636			-0.532743	-0.136183	-0.0620857	-0.314618	1.82532	-0.0557901	0.150409	0.0943259	0.993322	-0.245879	0.652197	0.099783	-0.00505491	-0.0444593	-0.138709	0.113674
SWIS12	-0.374515	-0.34896	-0.189937	-0.228109	-0.130973	0.0268709	-0.135946	0.0189626	0.0113493	-0.542526	-0.38458	-0.4917	-0.489408	-0.595561	-0.506819	-0.576485	-0.495877			-0.0682342	-0.455704	0.200968	-0.425832	-1.20516	-6.05924	-1.13949	-0.401491	-48.8028	-0.291131	0.278538	-0.00466026	0.2169	-0.149006	0.137458	-0.139826
SWIS13	-0.106452	-0.12363	0.0398159	0.0510481	0.102053	0.157912	0.103883	0.144626	0.1831	-0.0353221	0.0496646	-0.190581	-0.222203	-0.370615	-0.333978	-0.304967	-0.28195			0.161378	-1.32206	0.282104	0.999143	0.547355	-0.342145	0.392202	0.266024	-1.19291	-2.40605	-4.83737	0.165921	0.667914	-0.0988527	-0.086866	-0.075474
SWIS14	-0.0975848	-0.0451801	0.116255	0.0132991	0.0627217	0.12115	0.156928	0.18244	0.134852	0.162158	0.12233	-0.145096	-0.169818	-0.168072	-0.235527	-0.453564	-0.286095			-0.537018	-3.57315	-0.885604	3.71623	0.931552	0.295319	0.162568	-0.260839	0.202489	-0.245612	-2.1861	0.170384	-0.0102825	0.40135	0.925737	-0.369228
SWIS15	-0.0899976	-0.0377942	-0.035249	-0.041042	-0.0216462	-0.0468991	-0.0464243	-0.0611144	-0.0687868	-0.160356	-0.114879	-0.211263	-0.233234	-0.218808	-0.195905	-0.191278	-0.198717			-0.580053	-0.0673435	0.164344	-0.472584	1.16662	-0.0101249	0.316433	0.125541	1.3312	-0.2836	0.839009	0.103998	-0.0618528	-0.10467	-0.0236208	0.0388892
SWIS16	-0.0753633	-0.0237278	-0.00752502	0.00452308	0.0086182	-0.0171357	-0.0239255	-0.0155737	-0.0323456	-0.145865	-0.096162	-0.344493	-0.284126	-0.337626	-0.454323	-0.498408	-0.406437			-0.685155	-0.68286	-1.60107	0.905382	-2.98832	0.396234	-0.349075	1.07693	3.50958	-0.340745	2.58242	-0.175235	0.188299	0.345638	0.0970358	-0.18453
SWIS17	-0.113419	-0.0747302	-0.0106043	-0.00789582	-0.247629	-0.450016	-0.479569	-0.162537	-0.451393	-0.700644	-0.613603	-0.571191	-0.304339	-0.44255	-0.530471	-0.311358	-0.282138			-0.341115	-0.858099	-0.255412	30.362	0.817302	0.0656707	-0.661076	1.77716	0.552182	-0.12423	-0.0691197	-0.467185	0.454134	0.198669	-0.413053	-0.0938473
SWIS18	0.312024	0.334938	0.349945	0.375995	0.405018	0.388224	0.393134	0.363056	0.343997	0.127625	0.222208	-0.132462	-0.164607	-0.145688	-0.20934	-0.134973	-0.282524			0.0734351	0.044807	0.074439	0.0771906	-0.0414649	0.012646	-0.0765089	-0.0524936	-0.628994	0.741099	-1.59612	0.242671	-0.114932	0.436906	-0.355246	1.09319
SWIS19	-0.0583886	-0.044616	-0.0806199	-0.0582857	-0.0562235	-0.108192	-0.110924	-0.124322	-0.12043	-0.202228	-0.169155	-0.263752	-0.280538	-0.240243	-0.220342	-0.193363	-0.2511			-0.235877	0.806972	-0.277031	-0.0353807	0.924325	0.0252492	0.120789	-0.031311	0.679224	-0.163545	0.55923	0.0636443	-0.143635	-0.0828339	-0.122444	0.298598
SWIS20	0.391665	0.423675	0.42277	0.441955	0.472813	0.456249	0.464945	0.433559	0.432207	0.254402	0.329586	-0.0938069	-0.117912	-0.116829	-0.185348	-0.115387	-0.290349			0.0817292	-0.00213698	0.0453804	0.0698216	-0.0350329	0.0190598	-0.0675062	-0.00311721	-0.411389	0.295532	-1.28462	0.256964	-0.00918369	0.58649	-0.377458	1.51631
SWIS21	-0.0585632	0.00255296	0.0330899	0.0404161	0.0727226	0.0406796	0.0468285	-0.00718204	0.00804149	-0.176971	-0.116583	-0.375625	-0.395256	-0.380275	-0.37122	-0.318971	-0.390989			-1.04359	11.9614	0.221403	0.799345	-0.440619	0.151155	-1.15337	-2.11967	-23.0072	-0.341232	2.22196	0.0522621	-0.0379023	-0.023811	-0.140749	0.225783
SWIS22	0.249099	0.286255	0.270669	0.288594	0.281016	0.247689	0.251443	0.222633	0.205184	0.041096	0.107119	-0.149363	-0.161522	-0.17945	-0.196079	-0.140527	-0.201871			0.149162	-0.0544487	0.0662266	-0.0262582	-0.118594	0.0151548	-0.114577	-0.0783769	-0.799711	1.60656	-2.39436	0.0814065	0.110995	0.0926697	-0.283318	0.436533
SWIS23	0.11247	0.163192	0.18906	0.200852	0.212171	0.206423	0.205955	0.170198	0.155082	-0.0029909	0.0365666	-0.236603	-0.257611	-0.269346	-0.258671	-0.219608	-0.277394			0.45098	0.158507	0.0623721	0.0563564	-0.0270908	-0.00226598	-0.173619	-0.0888104	-1.01929	-13.2259	-7.47048	0.0887879	0.0455529	-0.0396295	-0.151014	0.263128
SWIS24	-0.0802511	-0.0742778	-0.0765569	-0.0786117	-0.0783388	-0.0940737	-0.0882515	-0.0989346	-0.0969927	-0.120597	-0.107733	-0.189381	-0.215486	-0.19675	-0.175058	-0.2267	-0.267639			-0.0744331	0.0306835	0.0268399	-0.00347116	0.200857	-0.0618895	0.121053	-0.0196288	0.243358	-0.106663	0.75787	0.137842	-0.0869496	-0.11025	0.294998	0.180586
SWIS25	-0.0817176	-0.034563	-0.000916493	0.0278064	0.0523273	0.0148697	0.0171858	-0.00854645	-0.0100163	-0.131093	-0.0940252	-0.182644	-0.199407	-0.234244	-0.148556	-0.217203	-0.239773			-0.577043	-0.973483	-31.34	0.881844	-0.715832	0.155758	-1.4973	0.171981	12.088	-0.282759	0.942501	0.0917805	0.174704	-0.365807	0.462096	0.103909
SWIS26	-0.109968	-0.0638137	-0.0346471	-0.00768314	0.0179402	-0.0106203	-0.00295928	-0.0379794	-0.0379758	-0.178798	-0.136435	-0.338586	-0.36046	-0.364392	-0.363575	-0.309215	-0.382324			-0.419707	-0.457059	-0.778246	-3.33501	-1.59198	-0.721356	11.834	-9.45243e-05	3.70822	-0.236932	1.48166	0.0646019	0.0109087	-0.00224089	-0.149516	0.236433
SWIS27	-0.149279	-0.122911	-0.0136605	-0.115739	-0.0989926	-0.0505251	-0.0242021	0.00817159	-0.0324818	-0.0278044	-0.0359731	-0.232766	-0.237051	-0.302569	-0.294504	-0.239563	-0.287422			-0.176631	-0.888859	7.47252	-0.144689	-0.489607	-0.520988	-1.33764	-4.97496	-0.143999	0.293793	5.47055	0.0184082	0.276387	-0.0266532	-0.186554	0.199774
SWIS28	-0.083689	0.123866	0.199657	0.204988	0.224915	0.205303	0.227737	0.174985	0.206015	-0.365162	0.0893876	-0.340218	-0.374414	-0.351831	-0.313001	-0.244527	-0.36905			-2.48008	0.611877	0.026701	0.0972112	-0.0871987	0.109274	-0.231636	0.177331	-2.7725	-1.24479	-4.80609	0.100514	-0.0603158	-0.110367	-0.218766	0.509241
SWIS29	0.143722	0.294363	0.326884	0.334259	0.345851	0.327902	0.329914	0.300207	0.287002	-0.0164802	-0.0410643	-0.159043	-0.175984	-0.185428	-0.233774	-0.159777	-0.278632			1.04814	0.11048	0.022562	0.0346795	-0.0518989	0.0061383	-0.0900451	-0.0439867	-1.05742	1.49173	2.87304	0.106514	0.0536626	0.26073	-0.316534	0.743887
SWIS30	-0.0355944	0.0345047	0.0555918	0.0525965	0.0941775	0.0516881	0.0777863	0.0168079	0.050064	-0.191833	-0.120583	-0.491022	-0.515557	-0.493528	-0.463193	-0.395626	-0.491036			-1.96939	0.611136	-0.0538792	0.790565	-0.451163	0.504918	-0.783922	1.97861	-4.83176	-0.371418	3.07207	0.049967	-0.0427295	-0.0614641	-0.145874	0.241162
SWIS31	-0.00271658	0.0579793	0.101442	0.106256	0.134207	0.111764	0.126215	0.0816621	0.0904254	-0.0948496	-0.0437516	-0.330059	-0.353463	-0.339962	-0.319425	-0.256942	-0.36496			-22.3427	0.749625	0.0474524	0.263054	-0.167228	0.129303	-0.352991	0.107312	-2.04893	-0.538727	6.54393	0.0709098	-0.0381973	-0.0604107	-0.195611	0.420402
SWIS32	-0.0676405	-0.033337	-0.000523043	0.00718127	0.0250005	-0.0227622	-0.0127356	-0.0362294	-0.0347589	-0.158376	-0.126155	-0.22837	-0.238497	-0.229167	-0.19614	-0.165693	-0.186762			-0.507145	-0.98431	-14.7298	2.48135	-1.91047	-0.440492	1.84472	-0.040587	3.55642	-0.203449	0.810236	0.0443461	-0.0391226	-0.144118	-0.155228	0.127156
SWIS33	0.112786	0.179628	0.148181	0.153415	0.176078	0.0949256	0.101388	0.200327	0.126408	0.0648731	0.0768827	-0.235318	-0.248255	-0.233707	-0.28495	-0.222138	-0.304057			0.592648	-0.175069	0.0353194	0.147724	-0.460888	0.0680769	0.975847	-0.36899	-0.486797	0.185125	-4.06074	0.0549768	-0.0586024	0.219265	-0.220433	0.368777
SWIS34	-0.114556	-0.0738149	-0.0475694	-0.0395979	-0.0101561	-0.0514832	-0.0507049	-0.0775153	-0.0703095	-0.197081	-0.150846	-0.35443	-0.379403	-0.371106	-0.377434	-0.322752	-0.392276			-0.355642	-0.355559	-0.167575	-0.74352	4.06919	-0.0151169	0.528754	-0.0929597	1.80305	-0.234598	1.34961	0.0704605	-0.0218685	0.0170523	-0.144878	0.21541
SWIS35																				#DIV/0!	#DIV/0!	#DIV/0!	#DIV/0!	#DIV/0!	#DIV/0!	#DIV/0!	#DIV/0!	#DIV/0!	#DIV/0!	#DIV/0!	#DIV/0!	#DIV/0!	#DIV/0!	#DIV/0!	#DIV/0!
PRCS1	0.545637	0.597409	0.65136	0.60574	0.569392	0.614498	0.62597	0.678044	0.66846	0.705733	0.713343	0.752027	0.60698	0.727461	0.691766	0.626592	0.631039			0.0948847	0.0903072	-0.0700378	-0.0600056	0.0792182	0.0186676	0.0831903	-0.0141347	0.0557595	0.0107831	0.0542285	-0.192875	0.198493	-0.0490675	-0.0942135	0.00709601
PRCS2	0.44894	0.481915	0.51465	0.476627	0.444295	0.466205	0.464981	0.559075	0.566681	0.625797	0.618892	0.570621	0.453336	0.593694	0.479243	0.40481	0.42672			0.0734507	0.067926	-0.0738809	-0.0678344	0.0493127	-0.00262449	0.202361	0.0136048	0.10432	-0.0110346	-0.0779958	-0.205538	0.30961	-0.192777	-0.155314	0.0541249
PRCS3	0.683722	0.722124	0.759348	0.729901	0.705331	0.734295	0.743774	0.773688	0.771208	0.800321	0.807688	0.824948	0.734895	0.800552	0.792366	0.749263	0.752981			0.0561651	0.051548	-0.0387787	-0.0336619	0.0410639	0.0129092	0.0402199	-0.0032057	0.0377499	0.00920438	0.0213696	-0.109161	0.0893421	-0.0102253	-0.0543987	0.0049631
PRCS4	0.504246	0.534227	0.594659	0.548208	0.490668	0.535345	0.551187	0.610228	0.601303	0.64674	0.662177	0.702425	0.553637	0.671198	0.642467	0.574404	0.579694			0.0594565	0.113122	-0.0781151	-0.104959	0.0910542	0.0295905	0.107117	-0.0146263	0.0755643	0.0238696	0.0607804	-0.211819	0.212342	-0.0428056	-0.105939	0.00920892
PRCS5	0.329249	0.380185	0.416858	0.366643	0.34647	0.396186	0.416455	0.476396	0.451781	0.51686	0.518118	0.551365	0.38107	0.470139	0.487738	0.403632	0.40828			0.154703	0.0964628	-0.120461	-0.0550217	0.143493	0.0511591	0.143932	-0.0516691	0.144051	0.0024347	0.0641681	-0.308861	0.233734	0.037434	-0.172441	0.0115142
PRCS6	0.359814	0.405075	0.480997	0.417033	0.364729	0.418505	0.433383	0.503866	0.485435	0.539542	0.553051	0.605287	0.441243	0.574399	0.492028	0.407137	0.412743			0.125789	0.187427	-0.132983	-0.12542	0.147441	0.0355495	0.162636	-0.0365791	0.111461	0.025038	0.0944497	-0.271019	0.301777	-0.143404	-0.172534	0.0137708
PRCS7	0.256828	0.308621	0.388615	0.30479	0.242408	0.305708	0.324555	0.410305	0.380853	0.450585	0.45988	0.605513	0.41196	0.502939	0.460192	0.358762	0.372944			0.201665	0.259198	-0.215701	-0.204672	0.261131	0.0616504	0.264206	-0.0717804	0.183095	0.0206288	0.316674	-0.319651	0.220844	-0.0849942	-0.220409	0.0395322
PRCS8	0.402644	0.427236	0.518866	0.444405	0.399301	0.420355	0.428941	0.551628	0.544429	0.605305	0.619336	0.552966	0.151745	0.575036	0.280456	0.143339	0.140806			0.0610771	0.214472	-0.143507	-0.101492	0.0527266	0.0204259	0.286023	-0.0130503	0.111816	0.0231793	-0.107163	-0.72558	2.78949	-0.512281	-0.488909	-0.0176667
PRCS9	0.456322	0.50231	0.570134	0.50425	0.459517	0.516994	0.534785	0.613341	0.607885	0.657895	0.672831	0.800703	0.565449	0.709555	0.632681	0.548273	0.56083			0.100782	0.135023	-0.115558	-0.0887133	0.125082	0.034412	0.146894	-0.00889539	0.0822693	0.0227014	0.190051	-0.293809	0.254852	-0.108341	-0.133412	0.0229022
PRCS10	0.46676	0.513168	0.579977	0.504854	0.453397	0.503844	0.522579	0.595928	0.582408	0.635141	0.646647	0.804398	0.54024	0.667725	0.617319	0.531846	0.542548			0.099426	0.13019	-0.129529	-0.101924	0.111265	0.0371833	0.14036	-0.0226871	0.0905423	0.0181164	0.243952	-0.328392	0.235978	-0.0754894	-0.138459	0.0201234
PRCS11	0.422113	0.46829	0.528102	0.459559	0.410919	0.457416	0.484022	0.554695	0.54407	0.607099	0.614415	0.564785	0.46975	0.59811	0.560275	0.469765	0.478942			0.109395	0.127725	-0.129792	-0.10584	0.113153	0.0581661	0.146013	-0.0191556	0.115849	0.0120493	-0.080776	-0.168268	0.273253	-0.0632571	-0.161545	0.0195341
PRCS12	0.601743	0.608298	0.639509	0.602795	0.518343	0.56335	0.548938	0.652197	0.670962	0.722555	0.714839	0.729106	0.581953	0.676635	0.599858	0.485586	0.497301			0.0108928	0.0513089	-0.0574093	-0.140101	0.0868292	-0.0255828	0.188107	0.0287723	0.0768931	-0.0106777	0.0199582	-0.201827	0.162696	-0.113468	-0.190498	0.0241245
PRCS13	0.590176	0.614312	0.649993	0.617194	0.5688	0.580552	0.584407	0.643042	0.674716	0.731758	0.72332	0.760913	0.612807	0.685224	0.662806	0.567803	0.577245			0.040897	0.058082	-0.050461	-0.0784099	0.0206614	0.00664047	0.100333	0.0492565	0.084542	-0.0115313	0.0519731	-0.194643	0.118174	-0.0327174	-0.143334	0.0166297
PRCS14	0.506463	0.578331	0.616091	0.585216	0.573257	0.582526	0.595614	0.652961	0.702734	0.764009	0.759278	0.791763	0.649426	0.736704	0.708255	0.631683	0.640679			0.141903	0.0652914	-0.0501143	-0.0204347	0.0161692	0.0224674	0.0962817	0.0762262	0.0871961	-0.00619234	0.0427832	-0.179772	0.134393	-0.0386172	-0.108113	0.0142414
PRCS15	0.522298	0.536466	0.616339	0.60326	0.548723	0.568722	0.568086	0.631738	0.659457	0.71707	0.71104	0.741498	0.586522	0.667598	0.623317	0.523507	0.540775			0.0271265	0.148887	-0.0212203	-0.090404	0.0364457	-0.00111781	0.112047	0.0438775	0.0873635	-0.00840853	0.0428356	-0.209004	0.138231	-0.066328	-0.160127	0.0329854
PRCS16	0.36656	0.33312	0.399036	0.32222	0.268655	0.324982	0.332023	0.412201	0.392679	0.453746	0.440042	0.425501	0.283642	0.500025	0.504468	0.383047	0.397383			-0.0912254	0.197873	-0.192505	-0.166237	0.209663	0.0216665	0.241484	-0.0473604	0.155513	-0.0302011	-0.0330445	-0.333393	0.762873	0.00888649	-0.240693	0.0374264
PRCS17	0.471928	0.497785	0.550047	0.533903	0.509897	0.520861	0.538649	0.590095	0.615499	0.681963	0.683422	0.69155	0.571854	0.633358	0.60976	0.535134	0.543191			0.0547902	0.10499	-0.0293508	-0.0449635	0.0215027	0.0341509	0.0955096	0.0430501	0.107984	0.00213933	0.0118938	-0.173085	0.107553	-0.0372587	-0.122386	0.0150561
PRCS18	0.754165	0.768087	0.808688	0.791446	0.762328	0.775989	0.772561	0.813222	0.829048	0.862797	0.866133	0.877517	0.826107	0.859312	0.844276	0.802861	0.807558			0.0184609	0.05286	-0.0213221	-0.0367907	0.0179199	-0.00441651	0.0526304	0.0194615	0.0407076	0.00386712	0.013143	-0.058586	0.0401948	-0.0174975	-0.0490539	0.00585049
PRCS19																				#DIV/0!	#DIV/0!	#DIV/0!	#DIV/0!	#DIV/0!	#DIV/0!	#DIV/0!	#DIV/0!	#DIV/0!	#DIV/0!	#DIV/0!	#DIV/0!	#DIV/0!	#DIV/0!	#DIV/0!	#DIV/0!
PRCS20	0.46987	0.525238	0.584947	0.576365	0.559064	0.58279	0.591344	0.63962	0.671665	0.719686	0.721498	0.776858	0.627134	0.742991	0.680892	0.610666	0.631103			0.117838	0.113679	-0.0146716	-0.0300175	0.0424404	0.0146766	0.0816381	0.0501002	0.0714953	0.00251797	0.0767291	-0.19273	0.18474	-0.0835793	-0.103138	0.0334672
PRCS21	0.21346	0.292024	0.366336	0.362408	0.334565	0.375579	0.384562	0.451557	0.475087	0.536949	0.540723	0.636945	0.576664	0.697734	0.626182	0.547934	0.571562			0.368047	0.254473	-0.0107226	-0.0768293	0.122592	0.0239154	0.174213	0.0521073	0.130213	0.00702898	0.17795	-0.0946405	0.209949	-0.10255	-0.12496	0.0431214
PRCS22	0.53208	0.589087	0.644861	0.605796	0.568379	0.613507	0.621993	0.668973	0.66436	0.700606	0.711372	0.769956	0.65134	0.715502	0.722304	0.658745	0.678903			0.107139	0.0946799	-0.0605789	-0.0617658	0.079399	0.0138316	0.0755303	-0.00689455	0.0545577	0.0153658	0.0823534	-0.154054	0.0985076	0.00950612	-0.0879951	0.0306013
PRCS23	0.291519	0.345072	0.467464	0.404232	0.327427	0.382351	0.406258	0.495073	0.491314	0.556526	0.571563	0.682031	0.562377	0.692462	0.634635	0.55033	0.576851			0.183702	0.354687	-0.135265	-0.190004	0.167745	0.0625268	0.218618	-0.00759317	0.13273	0.0270186	0.193274	-0.175438	0.231313	-0.0835093	-0.132839	0.048191
PRCS24	0.188517	0.204772	0.267501	0.18609	0.120084	0.168588	0.175034	0.291469	0.24968	0.318787	0.327391	0.423207	0.205581	0.400231	0.348237	0.259022	0.296365			0.0862248	0.306332	-0.304339	-0.354697	0.403914	0.0382361	0.665216	-0.143376	0.276785	0.0269904	0.292664	-0.51423	0.946827	-0.12991	-0.256191	0.144169
PRCS25	0.114251	0.150639	0.219103	0.163577	0.101372	0.15115	0.157119	0.271714	0.229684	0.305493	0.314143	0.337611	0.0670359	0.257315	0.155264	0.037194	0.0779435			0.318488	0.454491	-0.253425	-0.380281	0.491048	0.0394876	0.729357	-0.154687	0.330062	0.0283119	0.0747057	-0.80144	2.83846	-0.396599	-0.760446	1.09559
PRCS26	0.140842	0.170861	0.242769	0.175897	0.106673	0.155912	0.162187	0.277625	0.238614	0.309152	0.321003	0.501934	0.360537	0.584512	0.510386	0.416552	0.455204			0.213137	0.42086	-0.275457	-0.393545	0.461584	0.0402482	0.711754	-0.140518	0.295617	0.0383336	0.563645	-0.281704	0.621224	-0.126817	-0.183849	0.0927903
PRCS27	0.259891	0.314219	0.36021	0.355697	0.324358	0.351964	0.363063	0.426501	0.451212	0.538956	0.527612	0.598318	0.444402	0.567251	0.56448	0.464815	0.491877			0.209041	0.146368	-0.0125298	-0.0881045	0.0851085	0.0315333	0.17473	0.0579401	0.194462	-0.0210476	0.134011	-0.257248	0.276438	-0.00488535	-0.17656	0.0582196
PRCS28	0.339713	0.409104	0.485357	0.473742	0.445179	0.474938	0.48638	0.546106	0.592958	0.650206	0.646215	0.732258	0.689199	0.744352	0.671676	0.59612	0.617289			0.204264	0.186391	-0.0239307	-0.0602928	0.0668482	0.024091	0.122798	0.0857923	0.0965468	-0.00613922	0.13315	-0.0588024	0.0800243	-0.0976368	-0.112489	0.0355118
PRCS29	0.229013	0.318712	0.413715	0.421672	0.39644	0.420787	0.432432	0.484927	0.508925	0.564284	0.544645	0.71878	0.649365	0.725856	0.667255	0.584318	0.592499			0.391673	0.298084	0.0192331	-0.0598377	0.0614144	0.0276737	0.121396	0.0494879	0.108776	-0.0348038	0.319723	-0.0965735	0.117793	-0.0807342	-0.124296	0.0140018
PRCS30	0.452187	0.496661	0.557508	0.545068	0.520726	0.5422	0.552946	0.607945	0.655341	0.708215	0.708812	0.753292	0.677313	0.778792	0.70589	0.636069	0.657973			0.0983528	0.122511	-0.022312	-0.044659	0.0412389	0.0198185	0.0994656	0.0779616	0.0806808	0.000843009	0.0627527	-0.100863	0.149826	-0.093609	-0.0989113	0.0344366
PRCS31	0.463657	0.527599	0.579576	0.519364	0.459456	0.497241	0.508417	0.570178	0.570922	0.638596	0.651628	0.746222	0.669864	0.625547	0.666037	0.597047	0.615038			0.137908	0.0985177	-0.10389	-0.115349	0.0822396	0.0224746	0.121477	0.00130502	0.118535	0.0204058	0.145167	-0.102327	-0.0661577	0.0647276	-0.103584	0.0301334
PRCS32	0.283861	0.359034	0.431276	0.394189	0.357853	0.404494	0.420151	0.487042	0.502152	0.546754	0.55125	0.680093	0.561721	0.52428	0.507876	0.420721	0.439691			0.264823	0.20121	-0.0859918	-0.0921812	0.130337	0.0387079	0.159208	0.0310233	0.0888217	0.00822239	0.23373	-0.174053	-0.0666534	-0.0312892	-0.171606	0.0450885
PRCS33	0.450276	0.492689	0.557586	0.487345	0.443552	0.511647	0.532577	0.610257	0.610389	0.654125	0.672391	0.847002	0.640458	0.706605	0.66478	0.59165	0.604443			0.0941926	0.131722	-0.125973	-0.0898604	0.15352	0.0409079	0.145856	0.000216791	0.0716524	0.0279249	0.259687	-0.243853	0.103281	-0.0591918	-0.110007	0.0216237
PRCS34	0.263724	0.311403	0.407405	0.381835	0.346868	0.378097	0.392289	0.459966	0.487221	0.536396	0.536825	0.721823	0.497832	0.58228	0.53249	0.438372	0.440854			0.180793	0.308289	-0.0627644	-0.0915754	0.09003	0.0375352	0.17252	0.0592538	0.10093	0.000798154	0.344616	-0.310313	0.169631	-0.0855088	-0.176751	0.0056627
PRCS35	0.754165	0.768087	0.808688	0.791446	0.762328	0.775989	0.772561	0.813222	0.829048	0.862797	0.866133	0.877517	0.826107	0.859312	0.844276	0.802861	0.807558			0.0184609	0.05286	-0.0213221	-0.0367907	0.0179199	-0.00441651	0.0526304	0.0194615	0.0407076	0.00386712	0.013143	-0.058586	0.0401948	-0.0174975	-0.0490539	0.00585049
CYPS1	0.0846089	-0.179474	-0.0670605	-0.186758	-0.277923	-0.233929	-0.114039	-0.414578	-0.505407	-0.413174	-0.385991	-0.127811	-0.0790273	-0.12018	-0.0952044	-0.0825647	-0.229723			-3.12122	-0.62635	1.78491	0.488146	-0.158296	-0.512505	2.6354	0.219088	-0.182492	-0.0657916	-0.668875	-0.381687	0.52074	-0.207818	-0.132764	1.78234
CYPS2	-0.22753	-0.22715	-0.255318	-0.271975	-0.281596	-0.271885	-0.350621	-0.332666	-0.452876	-0.367795	-0.414221	-0.256059	-0.230065	-0.25885	-0.209434	-0.237298	-0.233054			-0.0016733	0.124007	0.0652422	0.0353756	-0.0344867	0.289592	-0.0512099	0.361355	-0.187868	0.126228	-0.38183	-0.101518	0.125118	-0.190905	0.133043	-0.0178846
CYPS3	0.34391	0.0111896	0.301581	0.0647588	-0.0853042	0.0378897	0.200531	-0.2042	-0.314017	-0.259212	-0.271054	0.0653408	0.161524	0.0761978	0.102444	0.1265	-0.0985493			-0.967464	25.952	-0.785269	-2.31726	-1.44417	4.29251	-2.01829	0.537796	-0.174528	0.0456839	-1.24106	1.47202	-0.528256	0.34445	0.234814	-1.77905
CYPS4	-0.223161	-0.155424	-0.139736	-0.12486	-0.119907	-0.107487	-0.100446	-0.17292	-0.227731	-0.148665	-0.186622	-0.124054	-0.189632	-0.185067	-0.157452	-0.18114	-0.129336			-0.303532	-0.100939	-0.106455	-0.0396692	-0.103579	-0.0655063	0.721524	0.316968	-0.34719	0.25532	-0.335268	0.528628	-0.0240694	-0.149219	0.150446	-0.285987
CYPS5	-0.103146	-0.0376727	-0.0745135	-0.0573582	-0.0123757	0.00108826	-0.00629654	-0.0752442	-0.0901351	-0.0815847	-0.104708	-0.0990185	-0.15262	-0.153686	-0.136338	-0.163955	-0.144833			-0.634762	0.977917	-0.23023	-0.784238	-1.08794	-6.78587	10.9501	0.197902	-0.0948623	0.283424	-0.054335	0.541333	0.00698528	-0.112885	0.202564	-0.11663
CYPS6	-0.346632	-0.377343	-0.367807	-0.440878	-0.454386	-0.39265	-0.290028	-0.424729	-0.447066	-0.427806	-0.446221	-0.339425	-0.302868	-0.339634	-0.311097	-0.310335	-0.309951			0.0885995	-0.0252725	0.198666	0.030638	-0.135867	-0.261358	0.464445	0.0525912	-0.0430826	0.0430458	-0.239334	-0.107704	0.121392	-0.0840208	-0.0024521	-0.00123474
CYPS7	-0.276498	-0.326046	-0.39128	-0.324666	-0.323486	-0.474873	-0.526631	-0.588519	-0.658433	-0.62222	-0.563483	-0.434056	-0.295252	-0.386131	-0.533751	-0.497081	-0.498196			0.179197	0.200076	-0.170248	-0.00363444	0.467988	0.108994	0.117516	0.118796	-0.0549985	-0.0943985	-0.229692	-0.319783	0.307802	0.382304	-0.0687022	0.00224364
CYPS8		-0.132827		-0.0136536	-0.19206	-0.119645	-0.0975701	-0.105444	-0.17364	-0.146184	-0.154937	-0.0945194	-0.117203	-0.122977	-0.110148	-0.126947	-0.115427			#DIV/0!	-1	#DIV/0!	13.0667	-0.377045	-0.184502	0.0806976	0.646751	-0.158121	0.0598818	-0.389951	0.239994	0.0492633	-0.104325	0.152513	-0.0907428
CYPS9	-0.200181	-0.202177	-0.223851	-0.274607	-0.277661	-0.268885	-0.287942	-0.420864	-0.473463	-0.396799	-0.431912	-0.291543	-0.300361	-0.322433	-0.28153	-0.284515	-0.375998			0.00997292	0.107203	0.226742	0.0111213	-0.0316086	0.0708744	0.461627	0.124979	-0.161922	0.0884902	-0.324994	0.0302451	0.0734851	-0.126857	0.0106032	0.32154
CYPS10	-0.308372	-0.327964	-0.323862	-0.285066	-0.278961	-0.270658	-0.227131	-0.335067	-0.409119	-0.365653	-0.266407	-0.247516	-0.250012	-0.25713	-0.252513	-0.312714	-0.286505			0.0635342	-0.0125076	-0.119792	-0.0214153	-0.0297632	-0.160822	0.475219	0.221005	-0.106243	-0.271422	-0.0709091	0.010086	0.0284704	-0.0179565	0.238407	-0.0838124
CYPS11	-0.398749	-0.486852	-0.517925	-0.432959	-0.426047	-0.428194	-0.356889	-0.337546	-0.335054	-0.305013	-0.34943	-0.313038	-0.373829	-0.348886	-0.366364	-0.417641	-0.39817			0.220948	0.063825	-0.164051	-0.0159641	0.00503897	-0.166526	-0.0541987	-0.00738291	-0.0896588	0.145621	-0.104146	0.194196	-0.0667232	0.0500963	0.139962	-0.0466202
CYPS12	-0.581742	-0.637937	-0.566894	-0.645334	-0.665482	-0.637483	-0.60622	-0.696409	-0.685712	-0.687264	-0.723419	-0.429708	-0.531121	-0.518118	-0.493818	-0.500958	-0.468395			0.0965985	-0.111364	0.138369	0.0312201	-0.0420732	-0.0490405	0.148772	-0.0153609	0.00226348	0.0526071	-0.406004	0.236006	-0.0244814	-0.0469016	0.0144592	-0.0650009
CYPS13	-0.235824	-0.224075	-0.257736	-0.219635	-0.224415	-0.270432	-0.243118	-0.332044	-0.381877	-0.337217	-0.329948	-0.229294	-0.3251	-0.278442	-0.255246	-0.278689	-0.243796			-0.049819	0.150218	-0.147827	0.0217632	0.20505	-0.101002	0.365777	0.15008	-0.11695	-0.0215568	-0.305059	0.417831	-0.14352	-0.0833061	0.0918439	-0.125203
CYPS14	-0.305287	-0.423339	-0.378557	-0.38968	-0.30432	-0.182178	-0.13827	-0.173148	-0.22982	-0.170177	-0.18104	-0.210147	-0.274856	-0.294405	-0.272589	-0.255942	-0.258741			0.386691	-0.105783	0.0293824	-0.219051	-0.401362	-0.241015	0.25224	0.327306	-0.259521	0.0638339	0.16078	0.307921	0.0711233	-0.0741001	-0.0610696	0.0109357
CYPS15	-0.125952	-0.0970096	-0.143376	-0.109279	-0.0998279	-0.0710362	-0.0539587	-0.0855742	-0.130502	-0.0751854	-0.0842237	-0.107266	-0.135412	-0.141957	-0.123094	-0.133349	-0.129119			-0.229789	0.477958	-0.237812	-0.0864897	-0.288414	-0.240405	0.58592	0.525019	-0.423877	0.120213	0.273581	0.262402	0.0483281	-0.132878	0.0833116	-0.031721
CYPS16	-0.20708	-0.186477	-0.200328	-0.249224	-0.234925	-0.191821	-0.222866	-0.307089	-0.31484	-0.280932	-0.279286	-0.171024	-0.201959	-0.206161	-0.181683	-0.1973	-0.174138			-0.0994945	0.0742764	0.244083	-0.0573747	-0.183479	0.16184	0.37791	0.0252407	-0.107701	-0.00585694	-0.387638	0.18088	0.0208048	-0.118731	0.0859529	-0.117394
CYPS17	-0.775914	-0.898225	-0.875602	-0.820288	-0.797807	-0.824573	-0.837307	-0.723734	-0.709846	-0.800854	-0.852685	-0.530521	-0.600442	-0.623829	-0.659578	-0.711036	-0.728313			0.157635	-0.0251872	-0.0631717	-0.0274065	0.0335501	0.0154424	-0.135641	-0.0191892	0.128209	0.0647197	-0.377823	0.131796	0.03895	0.0573057	0.0780172	0.024298
CYPS18	0.265005	0.136385	0.124533	-0.233192	-0.435039	-0.354985	0.0831683	-0.542625	-0.599113	-0.576717	-0.608136	-0.486509	-0.50221	-0.551717	-0.495269	-0.520819	-0.471487			-0.485351	-0.0869014	-2.87254	0.865583	-0.184015	-1.23429	-7.52442	0.104102	-0.037382	0.0544777	-0.2	0.0322734	0.098579	-0.102315	0.0515887	-0.09472
CYPS19	-0.201061	-0.212204	-0.246397	-0.297321	-0.298898	-0.335743	-0.249378	-0.316841	-0.373285	-0.366869	-0.36205	-0.281267	-0.294997	-0.303059	-0.278261	-0.277758	-0.263421			0.0554253	0.161133	0.206674	0.0053011	0.123272	-0.257236	0.270526	0.178144	-0.017186	-0.0131362	-0.223127	0.0488137	0.027331	-0.0818274	-0.00180523	-0.0516187
CYPS20	-0.187787	-0.302935	-0.262153	-0.484528	-0.576252	-0.496081	-0.427663	-0.596793	-0.639257	-0.619137	-0.655681	-0.474203	-0.371504	-0.469803	-0.407481	-0.403289	-0.424944			0.61318	-0.134624	0.848268	0.189304	-0.139124	-0.137918	0.395476	0.0711539	-0.0314741	0.059024	-0.276779	-0.216571	0.264595	-0.132654	-0.0102894	0.0536974
CYPS21	-0.0146937	-0.137585	-0.0640652	-0.345666	-0.476325	-0.375043	-0.0674661	-0.530316	-0.595558	-0.558444	-0.592782	-0.376229	-0.267911	-0.371527	-0.304682	-0.313301	-0.29508			8.36351	-0.534358	4.39553	0.377993	-0.212632	-0.820111	6.86048	0.123026	-0.0623178	0.0614871	-0.365316	-0.287906	0.386759	-0.179921	0.0282885	-0.0581568
CYPS22	0.281804	-0.0745447	-0.142799	-0.0188583	-0.0508304	-0.254898	-0.225452	-0.0984717	-0.207581	-0.173408	-0.229466	0.10432	-0.0133675	-0.0707518	-0.0992769	-0.0708189	-0.0201587			-1.26453	0.915621	-0.867939	1.69539	4.01467	-0.115519	-0.563225	1.10803	-0.164627	0.323277	-1.45462	-1.12814	4.29281	0.403171	-0.286653	-0.715348
CYPS23	-0.341778	-0.378224	-0.377414	-0.472893	-0.493319	-0.439554	-0.319696	-0.519287	-0.535096	-0.47339	-0.497999	-0.411801	-0.374589	-0.439738	-0.372994	-0.381042	-0.398648			0.106634	-0.00214133	0.252983	0.0431938	-0.108987	-0.272681	0.624317	0.0304432	-0.115318	0.0519846	-0.173089	-0.0903629	0.17392	-0.15178	0.0215753	0.0462058
CYPS24	-0.283624	-0.46998	-0.283359	-0.428343	-0.364472	-0.0545466	-0.485389	-0.365138	-0.330604	-0.407245	-0.521948	-0.419646	-0.38651	-0.476248	-0.542038	-0.544033	-0.507496			0.657051	-0.397082	0.511658	-0.149112	-0.850341	7.89861	-0.247741	-0.0945779	0.231821	0.281656	-0.196001	-0.0789615	0.232175	0.138143	0.00367992	-0.0671591
CYPS25	-0.575766	-0.490419	-0.22533	-0.488924	-0.411677	-0.178931	-0.428284	-0.360759	-0.104686	-0.497649	-0.563506	-0.195924	-0.205638	-0.210025	-0.243621	-0.289848	-0.288125			-0.148232	-0.540535	1.16981	-0.157995	-0.56536	1.39357	-0.157664	-0.709818	3.75374	0.132336	-0.652312	0.0495794	0.0213331	0.159964	0.189747	-0.00594387
CYPS26	-0.231265	-0.294966	-0.211689	-0.413045	-0.387938	-0.432245	-0.469594	-0.466183	-0.574216	-0.548425	-0.589977	-0.566858	-0.350425	-0.613712	-0.661441	-0.667322	-0.63019			0.275447	-0.282328	0.951189	-0.0607852	0.114214	0.086406	-0.00726273	0.231738	-0.0449156	0.0757657	-0.0391864	-0.381811	0.751337	0.0777701	0.00889082	-0.0556428
CYPS27	-0.35219	-0.407953	-0.393055	-0.504918	-0.547074	-0.49615	-0.316749	-0.57099	-0.599053	-0.579237	-0.592574	-0.433787	-0.392468	-0.454437	-0.400088	-0.398394	-0.402135			0.158333	-0.0365186	0.284598	0.0834907	-0.0930832	-0.361586	0.802657	0.0491479	-0.0330788	0.0230249	-0.267961	-0.0952519	0.157895	-0.119597	-0.00423211	0.00938949
CYPS28	-0.0070472	-0.135694	-0.0752706	-0.362302	-0.519785	-0.322857	0.199176	-0.499938	-0.587863	-0.562753	-0.657929	-0.428002	-0.572665	-0.601676	-0.564425	-0.664437	-0.527485			18.2551	-0.445293	3.81334	0.434671	-0.378864	-1.61692	-3.51003	0.175871	-0.0427134	0.169126	-0.349471	0.337997	0.0506605	-0.0619124	0.177192	-0.206117
CYPS29	-0.0306662	-0.187751	-0.13021	-0.409236	-0.525959	-0.433152	-0.114475	-0.572083	-0.627497	-0.604751	-0.641854	-0.42496	-0.403414	-0.451664	-0.40647	-0.418821	-0.391472			5.1224	-0.306473	2.14288	0.285224	-0.176454	-0.735716	3.99744	0.0968642	-0.0362488	0.061352	-0.337918	-0.0506997	0.119605	-0.100062	0.0303862	-0.0653005
CYPS30	-0.288581	-0.629512	-0.546262	-0.604448	-0.533759	-0.506399	-0.566051	-0.42544	-0.626346	-0.654534	-0.507565	-0.711426	-0.588524	-0.720902	-0.729749	-0.78918	-0.663948			1.18141	-0.132245	0.106516	-0.116948	-0.051259	0.117797	-0.248408	0.472233	0.0450031	-0.22454	0.401645	-0.172754	0.224932	0.0122728	0.0814398	-0.158686
CYPS31	-0.310322	-0.511545	-0.561965	-0.512295	-0.508074	-0.541686	-0.498527	-0.565882	-0.604855	-0.585323	-0.605107	-0.365179	-0.368394	-0.413152	-0.372866	-0.463054	-0.456152			0.648433	0.0985651	-0.0883869	-0.00823948	0.0661558	-0.0796753	0.135108	0.0688704	-0.0322919	0.0338009	-0.396505	0.00880403	0.121495	-0.0975094	0.241879	-0.0149052
CYPS32	-0.22418	-0.263998	-0.23913	-0.327476	-0.357568	-0.32158	-0.216126	-0.342277	-0.38365	-0.288152	-0.270363	-0.364254	-0.390185	-0.441037	-0.396581	-0.402646	-0.371619			0.177616	-0.0941968	0.369448	0.0918891	-0.100647	-0.327923	0.58369	0.120876	-0.248919	-0.0617376	0.347278	0.0711904	0.130327	-0.100797	0.0152918	-0.0770569
CYPS33	-0.146094	-0.185342	-0.242565	-0.322473	-0.364529	-0.361764	-0.304476	-0.431408	-0.487183	-0.468861	-0.475965	-0.28366	-0.208546	-0.267849	-0.222796	-0.218275	-0.20732			0.268651	0.308743	0.329429	0.130417	-0.00758717	-0.158357	0.416887	0.129287	-0.0376082	0.0151516	-0.404031	-0.264805	0.284366	-0.168204	-0.0202892	-0.0501883
CYPS34	-0.347523	-0.518249	-0.566397	-0.502941	-0.499763	-0.548751	-0.496109	-0.416718	-0.488582	-0.471603	-0.508845	-0.38731	-0.278153	-0.326599	-0.292669	-0.423054	-0.406705			0.491265	0.0929062	-0.112034	-0.00631883	0.0980224	-0.0959314	-0.160026	0.172451	-0.0347508	0.0789688	-0.238845	-0.281834	0.174171	-0.103888	0.445504	-0.0386462
CYPS35																				#DIV/0!	#DIV/0!	#DIV/0!	#DIV/0!	#DIV/0!	#DIV/0!	#DIV/0!	#DIV/0!	#DIV/0!	#DIV/0!	#DIV/0!	#DIV/0!	#DIV/0!	#DIV/0!	#DIV/0!	#DIV/0!
CZES1	0.307458	0.300127	0.273537	0.294128	0.312094	0.196409	0.200763	0.116612	0.0962505	0.0790673	-0.0383582	0.00220891	0.00421642	0.214364	0.226644	0.232462	0.272393			-0.0238454	-0.0885959	0.0752765	0.061084	-0.370675	0.02217	-0.419155	-0.17461	-0.178526	-1.48513	-1.05759	0.908827	49.8402	0.0572884	0.0256709	0.171772
CZES2	-0.214419	-0.1606	-0.169763	-0.107904	-0.185164	-0.101059	-0.169803	-0.165062	-0.191847	-0.171303	-0.162146	-0.153651	-0.15744	-0.0898847	-0.0527638	-0.0899267	-0.00524461			-0.251	0.0570565	-0.364385	0.716001	-0.454216	0.680226	-0.0279205	0.162276	-0.107088	-0.0534504	-0.0523923	0.0246568	-0.429085	-0.412983	0.704326	-0.941679
CZES3	0.435835	0.423401	0.395354	0.418618	0.448909	0.361579	0.372457	0.297581	0.27258	0.238297	0.160513	0.12336	0.167178	0.373057	0.358536	0.366764	0.414208			-0.0285277	-0.0662427	0.0588441	0.0723591	-0.194539	0.0300845	-0.201032	-0.0840132	-0.125773	-0.326416	-0.231463	0.3552	1.2315	-0.0389226	0.022947	0.12936
CZES4	-0.370824	-0.324219	-0.253845	-0.283337	-0.325156	-0.320497	-0.325782	-0.339578	-0.345946	-0.361179	-0.3711	-0.242398	-0.219354	-0.122665	-0.0886132	-0.0754097	-0.00974089			-0.12568	-0.217056	0.116178	0.147596	-0.0143289	0.0164911	0.0423469	0.0187533	0.0440327	0.0274683	-0.346812	-0.095066	-0.440792	-0.277599	-0.149001	-0.870827
CZES5	-0.0740383	-0.121542	-0.147274	-0.141683	-0.197739	-0.219595	-0.222722	-0.252582	-0.2564	-0.21147	-0.110708	-0.0980715	-0.109408	-0.0937371	-0.0863889	-0.0888909	-0.100775			0.641605	0.211718	-0.0379679	0.395646	0.110531	0.014238	0.134068	0.0151191	-0.175235	-0.476484	-0.114142	0.115596	-0.143235	-0.0783918	0.0289619	0.133692
CZES6	0.199456	0.200678	0.181778	0.198457	0.177782	0.101239	0.106791	0.0350981	0.026605	-0.00121099	-0.0792949	-0.0413534	-0.0506023	0.103455	0.136594	0.127237	0.167603			0.00612378	-0.0941787	0.0917549	-0.104182	-0.430546	0.054845	-0.671338	-0.241982	-1.04552	64.4792	-0.478487	0.223657	-3.04447	0.320323	-0.0685042	0.317256
CZES7	-0.361263	-0.345186	-0.376463	-0.360222	-0.349354	-0.4065	-0.423496	-0.439657	-0.444406	-0.448901	-0.434944	-0.392176	-0.406755	-0.323834	-0.11976	-0.097418	-0.0499444			-0.0445039	0.0906111	-0.0431421	-0.0301701	0.163577	0.0418094	0.0381628	0.0108001	0.010116	-0.0310916	-0.0983301	0.0371733	-0.20386	-0.630179	-0.186559	-0.487319
CZES8	-0.564743	-0.648866	-0.667377	-0.680953	-0.646261	-0.674746	-0.714065	-0.675548	-0.74385	-0.718301	-0.377263	-0.260319	-0.27492	-0.185961	-0.280965	-0.28709	-0.25186			0.148957	0.0285291	0.0203419	-0.0509469	0.0440776	0.0582722	-0.0539401	0.101105	-0.0343469	-0.474784	-0.309981	0.0560886	-0.323582	0.510883	0.021802	-0.122714
CZES9	-0.475587	-0.435239	-0.420491	-0.446529	-0.482699	-0.508309	-0.539965	-0.554802	-0.586326	-0.599524	-0.413695	-0.493979	-0.311814	-0.243411	-0.399779	-0.490859	-0.584885			-0.0848381	-0.0338848	0.0619228	0.0810024	0.0530558	0.0622773	0.0274765	0.0568202	0.02251	-0.30996	0.194064	-0.36877	-0.219372	0.642403	0.227828	0.191552
CZES10	-0.568498	-0.52038	-0.522243	-0.525381	-0.557066	-0.569531	-0.598073	-0.610146	-0.629854	-0.634584	-0.642532	-0.452122	-0.388052	-0.36045	-0.370721	-0.348577	-0.403498			-0.08464	0.0035798	0.00600831	0.0603093	0.0223768	0.0501137	0.0201875	0.0322992	0.00751098	0.0125246	-0.296344	-0.14171	-0.0711283	0.0284925	-0.0597303	0.157558
CZES11	-0.261683	-0.266717	-0.304908	-0.271636	-0.319605	-0.263669	-0.326644	-0.266455	-0.260372	-0.297938	-0.181013	-0.125652	-0.137153	-0.0903007	-0.0884	-0.115233	0.0161992			0.0192341	0.143191	-0.10912	0.176592	-0.175016	0.23884	-0.184263	-0.0228303	0.144278	-0.392448	-0.30584	0.0915306	-0.341606	-0.0210494	0.303542	-1.14058
CZES12	-0.673893	-0.654788	-0.630607	-0.649303	-0.647698	-0.657873	-0.651293	-0.661468	-0.669001	-0.676804	-0.683165	-0.603987	-0.563008	-0.52509	-0.536247	-0.534934	-0.40568			-0.0283495	-0.0369294	0.0296465	-0.00247203	0.0157103	-0.0100025	0.0156225	0.0113888	0.0116641	0.00939787	-0.115899	-0.067846	-0.0673497	0.0212478	-0.00244791	-0.241626
CZES13	-0.479848	-0.448387	-0.392639	-0.430743	-0.432028	-0.450168	-0.442064	-0.470798	-0.500083	-0.513931	-0.505648	-0.360351	-0.292899	-0.285352	-0.35743	-0.361885	-0.21247			-0.0655642	-0.124331	0.0970462	0.00298264	0.0419895	-0.0180036	0.0649996	0.0622029	0.0276925	-0.0161183	-0.287348	-0.187184	-0.0257657	0.252593	0.0124638	-0.412881
CZES14	-0.755054	-0.775328	-0.789818	-0.835464	-0.827359	-0.813315	-0.798227	-0.821392	-0.827648	-0.834238	-0.841297	-0.673898	-0.676454	-0.653866	-0.702491	-0.735945	-0.692749			0.0268509	0.0186886	0.0577935	-0.00970192	-0.0169735	-0.0185524	0.0290213	0.0076167	0.00796215	0.00846078	-0.198976	0.00379237	-0.0333922	0.0743658	0.0476214	-0.0586935
CZES15	-0.645714	-0.618249	-0.614494	-0.6556	-0.646722	-0.68856	-0.674482	-0.687514	-0.698878	-0.687917	-0.721283	-0.708883	-0.689344	-0.680507	-0.662422	-0.686569	-0.654637			-0.0425343	-0.00607384	0.0668927	-0.0135404	0.0646921	-0.0204453	0.0193208	0.0165287	-0.0156829	0.048502	-0.0171911	-0.0275631	-0.0128191	-0.0265759	0.0364529	-0.0465101
CZES16	-0.19628	-0.169126	-0.0125011	-0.0875766	-0.00698762	-0.00471808	-0.00306582	-0.0543513	-0.0740701	-0.0855123	-0.110784	-0.135282	-0.141645	-0.0404597	-0.030549	-0.0301545	0.0495977			-0.138344	-0.926084	6.00549	-0.920211	-0.324795	-0.350198	16.7282	0.362802	0.154479	0.29553	0.221137	0.0470328	-0.714358	-0.244952	-0.0129162	-2.64479
CZES17	-0.547324	-0.61556	-0.6192	-0.625319	-0.620189	-0.62952	-0.686119	-0.607312	-0.6724	-0.737949	-0.744964	-0.493119	-0.467107	-0.395462	-0.521999	-0.574421	-0.117354			0.124673	0.00591281	0.00988232	-0.00820264	0.0150446	0.089909	-0.11486	0.107173	0.0974856	0.00950643	-0.338064	-0.0527502	-0.15338	0.319974	0.100426	-0.795701
CZES18	0.222975	0.313294	0.461673	0.448795	0.40802	0.286666	0.320964	0.158112	0.168038	0.127503	0.0105704	0.0199243	0.059238	0.39033	0.416682	0.429458	0.51365			0.405063	0.473609	-0.0278941	-0.090855	-0.297422	0.119645	-0.507385	0.0627779	-0.241224	-0.917097	0.884902	1.97316	5.58919	0.0675118	0.0306598	0.196042
CZES19	-0.416485	-0.416325	-0.412251	-0.426112	-0.420697	-0.433093	-0.452243	-0.458199	-0.461962	-0.424605	-0.449123	-0.43962	-0.458413	-0.426392	-0.430783	-0.423544	-0.400152			-0.000382976	-0.00978489	0.0336216	-0.0127074	0.0294646	0.0442166	0.0131694	0.00821408	-0.0808674	0.0577451	-0.0211595	0.0427483	-0.0698524	0.0102991	-0.0168043	-0.0552292
CZES20	0.203406	0.247465	0.336548	0.289038	0.263252	0.0625389	0.0930085	-0.0419257	-0.0422815	-0.080719	-0.109511	-0.212502	-0.191158	0.114691	0.15702	0.162811	0.250312			0.216608	0.359981	-0.141169	-0.0892147	-0.762437	0.487211	-1.45077	0.00848456	0.909088	0.356691	0.94047	-0.100443	-1.59998	0.369065	0.0368818	0.53744
CZES21	0.139659	0.193574	0.254519	0.212165	0.146978	0.165484	0.0517114	0.0460015	0.0545229	0.000697222	-0.051235	-0.056978	-0.0262561	0.289795	0.318203	0.285544	0.373274			0.386042	0.314845	-0.166408	-0.307247	0.125908	-0.687514	-0.11042	0.185243	-0.987212	-74.4844	0.112092	-0.539189	-12.0373	0.0980269	-0.102635	0.307236
CZES22	0.297723	0.293433	0.291786	0.278675	0.177965	0.185169	0.0664459	0.0939568	0.0848239	0.0508183	0.0425899	-0.0186979	-0.00121571	0.149521	0.164871	0.214537	0.33755			-0.0144087	-0.00561241	-0.0449331	-0.361388	0.0404774	-0.64116	0.414035	-0.0972031	-0.400896	-0.161919	-1.43902	-0.934982	-123.991	0.102659	0.301243	0.573387
CZES23	0.125555	0.0530368	0.240615	0.096597	0.0355748	-0.0345065	-0.128767	-0.104953	-0.195598	-0.15515	-0.254832	0.0891035	0.0882994	0.277288	0.23958	0.225404	0.348627			-0.577581	3.53675	-0.59854	-0.63172	-1.96997	2.73166	-0.184933	0.863663	-0.206788	0.642485	-1.34966	-0.00902519	2.14031	-0.135987	-0.0591717	0.54668
CZES24	-0.0670195	-0.0630674	-0.0587661	-0.0629263	-0.0759843	-0.0790903	-0.0890019	-0.0830136	-0.0780777	-0.0734879	-0.0771807	-0.0928076	-0.10885	-0.0979408	-0.0832374	-0.091662	-0.0880692			-0.058969	-0.0682027	0.0707931	0.207513	0.0408759	0.12532	-0.0672826	-0.0594581	-0.0587859	0.0502503	0.202472	0.172856	-0.100222	-0.150125	0.101212	-0.0391964
CZES25	-0.0641944	-0.0143879	-0.011234	-0.00908873	-0.0722386	-0.0451865	-0.142575	-0.0860611	-0.103545	-0.141925	-0.213457	-0.136218	-0.136371	-0.0969534	-0.0501335	-0.0726725	0.0368849			-0.77587	-0.219206	-0.19096	6.94815	-0.374482	2.15525	-0.396379	0.203162	0.370653	0.504018	-0.36185	0.00112812	-0.289049	-0.482912	0.449579	-1.50755
CZES26	0.0683931	0.0893934	0.0750054	0.0856349	0.0277112	0.0506598	-0.107243	0.0303934	-0.0255103	-0.102267	-0.0680976	-0.0305203	-0.0080212	0.206631	0.248086	0.131818	0.336197			0.307054	-0.160952	0.141717	-0.676403	0.828135	-3.11692	-1.28341	-1.83934	3.00884	-0.334117	-0.551815	-0.737185	-26.7606	0.200624	-0.468661	1.55047
CZES27	-0.042666	-0.0217443	0.0356482	-0.0645105	-0.0507106	-0.139941	-0.100563	-0.185716	-0.183357	-0.194233	-0.21735	-0.240131	-0.241958	-0.133401	-0.0858934	-0.0761413	-0.00636422			-0.49036	-2.63943	-2.80964	-0.213918	1.7596	-0.281393	0.84677	-0.0127001	0.0593147	0.119015	0.104812	0.00761038	-0.448661	-0.356126	-0.113537	-0.916416
CZES28	0.16747	0.196364	0.279263	0.20612	0.202575	-0.00866619	0.0731124	-0.121557	-0.120282	-0.138487	-0.201715	-0.2449	-0.227656	0.0561512	0.104737	0.110094	0.187162			0.172536	0.422169	-0.261913	-0.0172025	-1.04278	-9.4365	-2.66261	-0.0104926	0.151353	0.456563	0.214088	-0.0704126	-1.24665	0.865269	0.0511438	0.70002
CZES29	0.155793	0.257726	0.305412	0.279643	0.202873	0.247199	0.0908148	0.190644	0.173139	0.0914891	0.0494159	0.0609621	0.0998462	0.401749	0.413821	0.334907	0.466313			0.654285	0.185025	-0.0843758	-0.274528	0.218489	-0.632624	1.09926	-0.0918168	-0.471587	-0.459871	0.233652	0.637841	3.02368	0.0300502	-0.190696	0.392364
CZES30	0.227638	0.297541	0.38797	0.301104	0.29579	-0.000551846	0.109192	-0.142082	-0.14483	-0.18064	-0.272879	-0.312178	-0.287602	0.104904	0.13215	0.150005	0.234538			0.307083	0.30392	-0.223898	-0.0176478	-1.00187	-198.866	-2.30122	0.0193356	0.24726	0.510621	0.144015	-0.078725	-1.36476	0.259718	0.135113	0.56353
CZES31	0.13693	0.204817	0.250117	0.236701	0.171318	0.00806237	0.0761761	-0.0939546	-0.0950915	-0.120851	-0.183192	-0.219089	-0.207957	0.0995572	0.0970676	0.100752	0.182687			0.49578	0.221175	-0.0536395	-0.276226	-0.952939	8.44835	-2.23339	0.0121005	0.270893	0.51585	0.19595	-0.0508096	-1.47874	-0.0250065	0.0379612	0.813224
CZES32	-0.213048	-0.166973	-0.175521	-0.148695	-0.180191	-0.131486	-0.223322	-0.149533	-0.148201	-0.181414	-0.191784	-0.204965	-0.19999	-0.054928	-0.0257794	-0.0364732	0.0264139			-0.216266	0.051195	-0.152837	0.211818	-0.270299	0.698451	-0.330417	-0.00890747	0.224111	0.0571626	0.0687296	-0.0242736	-0.725346	-0.530669	0.414819	-1.7242
CZES33	-0.248723	-0.247378	-0.302591	-0.303746	-0.28397	-0.282371	-0.299789	-0.302051	-0.346529	-0.338261	-0.347256	-0.209145	-0.203503	0.000550662	0.0129815	-0.0606038	0.0828234			-0.0054072	0.223192	0.0038158	-0.0651046	-0.00563294	0.0616837	0.00754573	0.147254	-0.0238586	0.0265916	-0.397722	-0.0269765	-1.00271	22.5744	-5.66847	-2.36664
CZES34	0.118171	0.16098	0.193904	0.134689	0.00742963	-0.0725881	-0.0347286	-0.157602	-0.16298	-0.182173	-0.226296	-0.26648	-0.252349	-0.00955267	0.00644428	0.0230951	0.108645			0.362265	0.20452	-0.305381	-0.944839	-10.7701	-0.521566	3.53811	0.0341246	0.117764	0.242202	0.177571	-0.053025	-0.962145	-1.6746	2.58381	3.70425
CZES35																				#DIV/0!	#DIV/0!	#DIV/0!	#DIV/0!	#DIV/0!	#DIV/0!	#DIV/0!	#DIV/0!	#DIV/0!	#DIV/0!	#DIV/0!	#DIV/0!	#DIV/0!	#DIV/0!	#DIV/0!	#DIV/0!
GERS1	0.521272	0.517873	0.381827	0.351845	0.309719	0.271551	0.233211	0.173087	0.140559	0.199531	0.0596925	0.00159773	0.313622	0.423349	0.305707	0.274329	0.22061			-0.00652126	-0.262702	-0.0785229	-0.119729	-0.123233	-0.141189	-0.257809	-0.187928	0.419554	-0.700836	-0.973234	195.292	0.349872	-0.277884	-0.102642	-0.195818
GERS2	0.242132	0.169638	0.121774	0.0797352	0.0287122	-0.0196198	-0.0222476	-0.0534068	-0.0491986	-0.0317363	-0.0804249	-0.106506	-0.0176731	0.0388608	0.0124744	0.0167129	0.0337636			-0.299398	-0.282153	-0.34522	-0.639906	-1.68333	0.133933	1.40057	-0.0787957	-0.354934	1.53416	0.324295	-0.834065	-3.19886	-0.678997	0.339777	1.02021
GERS3	0.652659	0.658921	0.627133	0.584132	0.474388	0.476441	0.477901	0.475134	0.444994	0.38542	0.370954	0.319274	0.586866	0.671215	0.574287	0.555474	0.538396			0.00959503	-0.0482422	-0.0685686	-0.187874	0.0043265	0.00306573	-0.00579019	-0.0634358	-0.133874	-0.037534	-0.139318	0.838129	0.143728	-0.144406	-0.0327586	-0.0307453
GERS4	0.286787	0.269822	0.148386	0.126928	0.116257	0.0550228	0.0308043	-0.0195062	-0.00645633	0.0133169	-0.0661571	-0.0887364	0.0872171	0.132671	0.0560871	0.0449576	0.0318752			-0.0591568	-0.450059	-0.14461	-0.0840738	-0.526712	-0.440154	-1.63323	-0.669011	-3.06261	-5.96791	0.341299	-1.98288	0.521156	-0.577246	-0.198432	-0.290995
GERS5	0.021312	0.0266059	0.0111279	-0.0247249	-0.168871	-0.052611	-0.140849	-0.0544416	-0.142706	-0.0434357	-0.0585298	-0.0728702	-0.0420631	-0.0314853	-0.0301611	-0.0394651	-0.0428037			0.248397	-0.58175	-3.22188	5.83001	-0.688455	1.67718	-0.613476	1.62127	-0.695629	0.347505	0.24501	-0.422767	-0.251475	-0.042056	0.308474	0.0845961
GERS6	0.267599	0.258282	0.148807	0.127234	0.123617	0.0691902	0.0561634	0.00374304	0.00466995	0.026748	-0.04971	-0.0865384	0.0903261	0.143695	0.0929901	0.0860483	0.0640916			-0.0348166	-0.423857	-0.144977	-0.0284281	-0.440285	-0.188275	-0.933354	0.247635	4.72768	-2.85846	0.740864	-2.04377	0.590844	-0.352864	-0.0746512	-0.255167
GERS7	0.530789	0.529698	0.426421	0.417177	0.372627	0.321425	0.275432	0.202249	0.17167	0.23986	0.0870727	0.0559221	0.38243	0.474934	0.357896	0.323261	0.31846			-0.00205493	-0.194974	-0.0216773	-0.10679	-0.137408	-0.143092	-0.265703	-0.151195	0.397217	-0.636985	-0.357754	5.83862	0.241885	-0.246431	-0.0967725	-0.0148526
GERS8	-0.448642	-0.456	-0.577352	-0.54682	-0.617427	-0.728339	-0.340602	-0.362773	-0.588524	-0.412261	-0.510777	-0.658328	-0.569572	-0.403153	-0.58213	-0.364873	-0.688905			0.0164012	0.266123	-0.0528833	0.129123	0.179635	-0.532358	0.0650947	0.622292	-0.2995	0.238964	0.288874	-0.134819	-0.292184	0.443943	-0.373211	0.888071
GERS9	0.445944	0.472973	0.500366	0.461072	0.453012	0.360397	0.380873	0.311127	0.29934	0.3664	0.21677	0.160097	0.482704	0.0968152	-0.0472749	-0.0641784	0.384924			0.0606108	0.0579173	-0.0785303	-0.0174819	-0.204442	0.0568138	-0.183122	-0.0378847	0.224025	-0.408378	-0.261444	2.01507	-0.799431	-1.4883	0.357557	-6.99771
GERS10	0.314928	0.3381	0.347783	0.345628	0.305404	0.249897	0.214659	0.14384	0.128516	0.199932	0.0368069	-0.024436	0.314349	0.226107	0.113147	0.199182	0.265935			0.0735779	0.0286403	-0.00619771	-0.116379	-0.18175	-0.14101	-0.329915	-0.106533	0.555698	-0.815903	-1.6639	-13.8642	-0.280712	-0.499585	0.760376	0.335135
GERS11	0.408806	0.401223	0.2718	0.255871	0.214247	0.16097	0.133487	0.062727	0.0394833	0.10765	-0.0268563	-0.0562835	0.23833	0.34435	0.230707	0.198136	0.192678			-0.0185485	-0.32257	-0.0586063	-0.162676	-0.24867	-0.170735	-0.530089	-0.370553	1.72647	-1.24948	1.09573	-5.23446	0.444845	-0.330022	-0.141178	-0.0275486
GERS12	0.536048	0.428973	0.504922	0.517188	0.488456	0.318977	0.395889	0.327129	0.319198	0.249055	0.104997	0.142285	0.486504	0.278143	0.330953	0.16166	0.366439			-0.199749	0.177048	0.0242945	-0.0555558	-0.346969	0.241122	-0.173686	-0.0242428	-0.219748	-0.578416	0.35513	2.41922	-0.428281	0.189864	-0.511531	1.26672
GERS13	0.670685	0.638745	0.625753	0.576549	0.591791	0.566991	0.529542	0.473648	0.457374	0.518152	0.388758	0.338014	0.600307	0.518655	0.451357	0.220569	0.442248			-0.0476239	-0.0203389	-0.0786327	0.026438	-0.0419067	-0.0660491	-0.105551	-0.0343601	0.132886	-0.249723	-0.130527	0.77598	-0.136017	-0.129755	-0.51132	1.00503
GERS14	0.424189	0.399067	0.298298	-0.00662308	0.0772394	0.0756259	0.0754485	0.0960702	0.108806	0.231896	0.0350489	-0.0832221	0.332265	0.140467	-0.199989	-0.315066	-0.20256			-0.0592239	-0.25251	-1.0222	-12.6622	-0.0208896	-0.0023456	0.273322	0.132563	1.13129	-0.84886	-3.37446	-4.99251	-0.577244	-2.42374	0.575417	-0.357088
GERS15	0.632463	0.657272	0.643648	0.640765	0.646939	0.620064	0.580772	0.535991	0.525235	0.572964	0.464335	0.0935598	0.412787	0.210404	0.329835	0.140003	0.520158			0.0392259	-0.0207272	-0.00448041	0.00963626	-0.0415424	-0.0633669	-0.077106	-0.0200688	0.0908721	-0.189591	-0.798508	3.41202	-0.490286	0.567629	-0.575536	2.71533
GERS16	0.415318	0.367062	0.26885	0.267247	0.230861	0.180724	0.137033	0.066838	0.0461504	0.108525	-0.0162997	-0.0290871	0.251136	0.33195	0.209911	0.197449	0.195558			-0.11619	-0.267562	-0.00596286	-0.136149	-0.217173	-0.24176	-0.512247	-0.309518	1.35155	-1.15019	0.784513	-9.63394	0.321793	-0.367641	-0.059371	-0.00957542
GERS17	0.520137	0.413682	0.389651	0.435945	0.404379	0.00550885	0.330854	0.24614	0.223943	0.0267263	-0.00313041	0.0365669	0.417662	0.516455	0.130138	0.383586	0.0491026			-0.204668	-0.0580891	0.118808	-0.0724087	-0.986377	59.0586	-0.256046	-0.0901805	-0.880656	-1.11713	-12.6812	10.4219	0.236538	-0.748016	1.94752	-0.871991
GERS18	0.64087	0.637622	0.639655	0.546996	0.561918	0.567461	0.565942	0.520366	0.495469	0.54423	0.436627	0.400744	0.658822	0.658673	0.521887	0.463403	0.468343			-0.00506875	0.00318925	-0.144857	0.027279	0.00986519	-0.00267819	-0.080531	-0.0478447	0.0984126	-0.197715	-0.082183	0.643997	-0.000225197	-0.207669	-0.112063	0.0106615
GERS19	0.421052	0.412565	0.371139	0.28916	0.283187	0.254064	0.225299	0.164475	0.149029	0.203494	0.0871753	0.0533282	0.341721	0.322475	0.187178	0.161986	0.153172			-0.0201554	-0.100411	-0.220884	-0.0206582	-0.102841	-0.113217	-0.269971	-0.0939109	0.365464	-0.571607	-0.388265	5.40788	-0.0563193	-0.419558	-0.13459	-0.0544143
GERS20	0.678807	0.675228	0.611481	0.618558	0.579246	0.51879	0.48823	0.433333	0.412089	0.448095	0.33424	0.34564	0.604163	0.675258	0.602409	0.586788	0.557639			-0.00527297	-0.0944076	0.0115725	-0.0635538	-0.10437	-0.0589065	-0.112442	-0.0490243	0.0873736	-0.254087	0.0341086	0.747953	0.117675	-0.107883	-0.0259316	-0.0496754
GERS21	0.647482	0.639264	0.602825	0.567228	0.547344	0.514233	0.484555	0.427389	0.405956	0.453365	0.334511	0.282107	0.573769	0.635776	0.529075	0.500494	0.473415			-0.0126929	-0.0570008	-0.0590505	-0.035056	-0.0604926	-0.0577147	-0.117975	-0.0501494	0.116785	-0.262159	-0.156661	1.03387	0.10807	-0.167828	-0.0540203	-0.0541059
GERS22	0.500808	0.505435	0.518086	0.484431	0.378307	0.380374	0.388236	0.384338	0.365017	0.320115	0.300854	0.253874	0.497805	0.443428	0.31473	0.369279	0.339906			0.00923883	0.0250292	-0.0649586	-0.219071	0.00546387	0.0206695	-0.0100387	-0.0502713	-0.123014	-0.0601678	-0.156155	0.960834	-0.109235	-0.290235	0.173321	-0.0795425
GERS23	0.57485	0.567225	0.476215	0.46907	0.419282	0.391336	0.356131	0.296997	0.266246	0.317961	0.198121	0.172426	0.444796	0.53319	0.432221	0.426445	0.393212			-0.0132646	-0.160447	-0.0150039	-0.106142	-0.0666508	-0.0899621	-0.166047	-0.103538	0.194235	-0.3769	-0.129695	1.57963	0.19873	-0.189367	-0.0133645	-0.0779295
GERS24	0.494055	0.513857	0.364845	0.361911	0.33958	0.312244	0.277325	0.220431	0.201264	0.21435	0.0843416	0.0449015	0.297826	0.377128	0.274184	0.269043	0.236251			0.04008	-0.289988	-0.00804126	-0.0617015	-0.0804994	-0.111832	-0.205155	-0.0869529	0.0650209	-0.606523	-0.467624	5.63287	0.266272	-0.272968	-0.0187525	-0.121884
GERS25	0.337944	0.26297	0.317455	0.271296	0.190094	-0.00439466	0.20465	0.142496	0.0958697	0.15516	0.0332725	-0.0311459	0.235307	0.200349	0.17416	0.170013	0.154239			-0.221853	0.207193	-0.145403	-0.299311	-1.02312	-47.5678	-0.303705	-0.327214	0.61845	-0.78556	-1.93608	-8.55499	-0.148564	-0.130718	-0.023812	-0.0927767
GERS26	0.576272	0.579228	0.474163	0.474386	0.44328	0.410051	0.371488	0.313176	0.27854	0.336828	0.216862	0.193357	0.487064	0.559115	0.466887	0.456022	0.414879			0.0051286	-0.181387	0.000470517	-0.0655715	-0.0749614	-0.0940451	-0.156969	-0.110597	0.209264	-0.356165	-0.108384	1.51899	0.147927	-0.164953	-0.0232708	-0.0902216
GERS27	0.515627	0.518719	0.450437	0.441023	0.380807	0.324327	0.283363	0.215561	0.184385	0.250305	0.115838	0.108637	0.414073	0.517134	0.417035	0.397299	0.367653			0.00599639	-0.131637	-0.0208981	-0.136538	-0.148315	-0.126307	-0.239275	-0.144625	0.357508	-0.537211	-0.0621701	2.81155	0.248895	-0.193565	-0.0473247	-0.0746181
GERS28	0.663448	0.660417	0.59144	0.589136	0.547627	0.514091	0.475441	0.412893	0.37845	0.434612	0.29995	0.251072	0.556534	0.659834	0.575904	0.547105	0.524289			-0.00456929	-0.104444	-0.00389616	-0.0704569	-0.0612391	-0.0751805	-0.13156	-0.0834172	0.148398	-0.309845	-0.162954	1.21664	0.185612	-0.127198	-0.0500076	-0.0417029
GERS29	0.688721	0.675548	0.687191	0.627873	0.620843	0.609361	0.584747	0.538169	0.527585	0.556197	0.45697	0.431986	0.646518	0.69009	0.597524	0.565012	0.551663			-0.019127	0.0172348	-0.0863192	-0.0111962	-0.0184947	-0.0403919	-0.0796562	-0.0196652	0.0542303	-0.178401	-0.0546734	0.496617	0.0673951	-0.134137	-0.0544102	-0.023626
GERS30	0.657945	0.651015	0.575161	0.571178	0.530731	0.478217	0.424158	0.351526	0.322254	0.391895	0.228706	0.21802	0.584669	0.661408	0.578556	0.547543	0.530393			-0.0105332	-0.116516	-0.00692438	-0.0708132	-0.0989479	-0.113042	-0.171237	-0.0832729	0.216107	-0.416411	-0.0467222	1.68172	0.131251	-0.125266	-0.0536044	-0.0313222
GERS31	0.57548	0.580394	0.459787	0.448407	0.392706	0.36849	0.328856	0.265285	0.225479	0.299277	0.152233	0.129104	0.460699	0.592266	0.486098	0.450282	0.430647			0.0085391	-0.207801	-0.0247508	-0.12422	-0.061664	-0.107559	-0.19331	-0.15005	0.327294	-0.491331	-0.151933	2.56844	0.285581	-0.179257	-0.0736812	-0.0436053
GERS32	0.368387	0.372426	0.292047	0.300574	0.253105	0.2345	0.209978	0.148277	0.117011	0.173788	0.0582797	0.019766	0.297127	0.423873	0.323075	0.29393	0.261911			0.010965	-0.215825	0.0291948	-0.157927	-0.0735079	-0.104568	-0.293849	-0.210861	0.485226	-0.66465	-0.660843	14.0322	0.426575	-0.237804	-0.0902092	-0.108935
GERS33	0.580953	0.596507	0.533777	0.524786	0.475913	0.444042	0.415953	0.361874	0.325058	0.389982	0.268001	0.238338	0.518839	0.595114	0.558466	0.520091	0.49799			0.0267735	-0.105164	-0.0168441	-0.0931288	-0.0669674	-0.0632581	-0.130013	-0.101737	0.19973	-0.312787	-0.110681	1.17691	0.147009	-0.0615805	-0.0687159	-0.0424933
GERS34	0.594116	0.585738	0.494121	0.48641	0.442627	0.40088	0.357738	0.28957	0.2621	0.321887	0.177243	0.0950414	0.473398	0.582225	0.4912	0.468902	0.449706			-0.014102	-0.156413	-0.0156043	-0.0900133	-0.0943171	-0.107619	-0.190551	-0.0948655	0.228107	-0.449363	-0.463778	3.98096	0.229887	-0.156341	-0.0453934	-0.0409385
GERS35																				#DIV/0!	#DIV/0!	#DIV/0!	#DIV/0!	#DIV/0!	#DIV/0!	#DIV/0!	#DIV/0!	#DIV/0!	#DIV/0!	#DIV/0!	#DIV/0!	#DIV/0!	#DIV/0!	#DIV/0!	#DIV/0!
DENS1	0.240915	0.316082	0.32761	0.339182	0.23977	0.252789	-0.223279	-0.187488	-0.158606	-0.123537	-0.134924	-0.0900048	0.160675	0.0382132	-0.107238	-0.111298	-0.135593			0.312006	0.0364707	0.0353228	-0.293093	0.0542983	-1.88326	-0.160298	-0.154048	-0.221105	0.0921693	-0.33292	-2.78519	-0.762172	-3.8063	0.0378584	0.218291
DENS2	-0.0530485	-0.0419561	0.0459223	0.0253951	-0.109541	-0.0132791	-0.141166	-0.176913	-0.181978	-0.122576	-0.125308	-0.183339	-0.0977194	-0.144432	-0.179509	-0.170617	-0.190252			-0.209099	-2.09453	-0.446999	-5.31349	-0.878775	9.63066	0.253229	0.0286333	-0.326423	0.0222837	0.463107	-0.467001	0.478032	0.242861	-0.0495403	0.115085
DENS3	0.349003	0.444487	0.399703	0.403729	0.307128	0.361296	-0.328229	-0.294053	-0.32941	-0.295843	-0.4273	-0.0954129	-0.100813	0.107039	-0.0386136	0.0447034	0.0460863			0.273593	-0.100756	0.0100721	-0.239272	0.176371	-1.90848	-0.104123	0.120242	-0.101901	0.444345	-0.776707	0.0565935	-2.06176	-1.36074	-2.15771	0.0309351
DENS4	-0.0731082	-0.0414576	-0.0573122	0.0169147	-0.00911719	-0.0855857	-0.130845	-0.11929	-0.122754	-0.149097	-0.148568	-0.118719	-0.0789936	-0.104807	-0.136999	-0.122583	-0.155359			-0.432928	0.38243	-1.29513	-1.53901	8.38729	0.528817	-0.088313	0.0290415	0.2146	-0.00354558	-0.200914	-0.334616	0.326782	0.307149	-0.105229	0.26738
DENS5	-0.043207	-0.0397111	-0.0322224	-0.0332769	-0.0631741	-0.0629793	-0.0956005	-0.0976917	-0.0937419	-0.0932868	-0.0767954	-0.0218974	-0.0162379	-0.0219539	-0.0225344	-0.0229336	-0.0274767			-0.0809105	-0.18858	0.0327267	0.898436	-0.00308336	0.517967	0.0218751	-0.0404315	-0.00485551	-0.176782	-0.71486	-0.258455	0.352016	0.026439	0.0177178	0.198098
DENS6	-0.036722	0.0264675	-0.0195361	0.086922	0.0455286	-0.0708069	-0.143561	-0.125396	-0.13073	-0.173574	-0.22473	-0.118059	-0.0933834	-0.111081	-0.15949	-0.170531	-0.186759			-1.72075	-1.73812	-5.44931	-0.476213	-2.55522	1.0275	-0.12653	0.0425304	0.327733	0.294719	-0.47466	-0.209014	0.189514	0.4358	0.0692305	0.0951616
DENS7	-0.0531144	0.0431472	0.1267	0.13886	0.0851332	-0.0458087	-0.14325	-0.109254	-0.0904413	-0.161975	-0.193903	-0.0966654	-0.0485419	-0.125232	-0.196804	-0.186837	-0.229044			-1.81235	1.93646	0.0959765	-0.386914	-1.53808	2.12714	-0.237317	-0.172195	0.790943	0.197116	-0.501475	-0.497836	1.57986	0.571518	-0.0506434	0.225904
DENS8	-0.0891345	-0.172188	-0.174624	0.00175885	-0.260715	-0.318787	-0.489981	-0.315288	-0.33709	-0.239196	-0.187926	0.0759631	-0.257072	0.0476276	0.0236731	0.0219677	-0.323544			0.931779	0.0141489	-1.01007	-149.231	0.222741	0.537015	-0.356529	0.0691477	-0.290409	-0.214341	-1.40422	-4.38417	-1.18527	-0.502955	-0.0720388	-15.7282
DENS9	-0.115126	-0.201395	-0.110233	-0.171397	-0.203936	-0.200892	-0.285361	-0.267748	-0.335025	-0.260791	-0.440208	-0.109475	0.00361479	-0.0240497	-0.192788	-0.215033	-0.262415			0.749344	-0.452652	0.554858	0.189843	-0.0149235	0.42047	-0.0617234	0.251271	-0.221576	0.687971	-0.75131	-1.03302	-7.65313	7.01625	0.115386	0.220348
DENS10	-0.169611	-0.236654	-0.0447068	-0.210332	-0.244447	-0.261451	-0.301551	-0.301178	-0.367996	-0.334949	-0.476735	-0.122136	-0.157531	-0.11647	-0.148176	-0.149709	-0.161447			0.395279	-0.811088	3.70471	0.162197	0.0695596	0.153375	-0.00123909	0.221856	-0.0898034	0.423308	-0.743806	0.289797	-0.260656	0.272231	0.0103435	0.0784045
DENS11	-0.0458483	0.0274531	-0.0232019	0.0673552	0.0624772	-0.0662369	-0.144604	-0.123893	-0.129146	-0.172968	-0.224472	-0.106918	-0.0910982	-0.0886879	-0.156772	-0.170633	-0.189554			-1.59878	-1.84515	-3.903	-0.0724223	-2.06018	1.18313	-0.143226	0.0424059	0.339317	0.297765	-0.52369	-0.147963	-0.0264584	0.767678	0.0884141	0.11089
DENS12	-0.446136	-0.408129	-0.101608	-0.227068	-0.351642	-0.2881	-0.273895	-0.326596	-0.391492	-0.357427	-0.52916	-0.170972	-0.189939	-0.047388	-0.142927	-0.174935	-0.275176			-0.085191	-0.75104	1.23475	0.548624	-0.180702	-0.0493032	0.192411	0.198703	-0.0870124	0.480469	-0.676898	0.110933	-0.750509	2.0161	0.223949	0.573018
DENS13	-0.0532473	-0.16356	-0.043848	-0.167026	-0.116863	-0.123027	-0.209543	-0.170658	-0.246337	-0.17358	-0.380764	-0.153116	-0.180817	-0.0213587	0.00674056	-0.0247841	-0.0819064			2.0717	-0.731914	2.80921	-0.300333	0.0527458	0.703234	-0.185571	0.443452	-0.295354	1.19359	-0.597872	0.180915	-0.881877	-1.31559	-4.67687	2.30479
DENS14	-0.186148	-0.160911	-0.109618	-0.255028	-0.185042	-0.131249	-0.169585	-0.150058	-0.230575	-0.189428	-0.452563	-0.144516	-0.207327	-0.0630239	-0.155215	-0.168717	-0.189633			-0.135575	-0.318766	1.32652	-0.274427	-0.290705	0.292086	-0.115145	0.536573	-0.178455	1.3891	-0.680673	0.434635	-0.696017	1.46279	0.0869926	0.123969
DENS15	-0.105226	-0.144947	-0.091726	-0.100617	-0.0424761	-0.115362	-0.111918	-0.103916	-0.104549	-0.12355	-0.242316	-0.114835	-0.0795476	-0.114944	-0.145462	-0.148026	-0.15874			0.377484	-0.367176	0.0969318	-0.577844	1.71592	-0.0298553	-0.0714933	0.00609378	0.181735	0.961283	-0.526096	-0.307285	0.444974	0.265502	0.0176283	0.0723749
DENS16	-0.0200919	0.0420539	-0.00267398	0.114971	0.0787201	-0.0601105	-0.143398	-0.118821	-0.122328	-0.174986	-0.225478	-0.0974209	-0.0849791	-0.0827762	-0.154004	-0.166655	-0.188047			-3.09308	-1.06358	-43.9962	-0.315306	-1.7636	1.38557	-0.171385	0.0295086	0.430468	0.288549	-0.567935	-0.127713	-0.0259226	0.860492	0.0821465	0.128362
DENS17	0.142319	-0.0975787	0.0197732	0.189761	0.0149715	-0.199252	-0.367066	-0.150204	-0.187588	-0.17196	-0.210076	-0.200637	0.0841172	-0.0359591	-0.106161	-0.0658743	-0.0599891			-1.68563	-1.20264	8.59686	-0.921104	-14.3088	0.84222	-0.5908	0.248891	-0.0833076	0.221651	-0.04493	-1.41925	-1.42749	1.95228	-0.379489	-0.0893385
DENS18	0.43547	0.427573	0.323075	0.5006	0.533032	0.423199	0.290039	0.335104	0.353253	-0.628987	-0.703444	-0.129223	0.45375	0.40046	0.220654	0.140157	0.107592			-0.0181336	-0.244399	0.549486	0.0647865	-0.206053	-0.314653	0.155379	0.0541582	-2.78056	0.118375	-0.816299	-4.51136	-0.117443	-0.448998	-0.364812	-0.232344
DENS19	-0.0245352	0.0789983	0.0588846	0.161494	0.127546	-0.0282627	-0.135458	-0.105946	-0.10275	-0.173532	-0.238578	-0.091301	-0.0558663	-0.0648728	-0.154338	-0.167459	-0.189937			-4.21979	-0.254609	1.74254	-0.210207	-1.22159	3.79283	-0.217865	-0.0301681	0.688873	0.374836	-0.617312	-0.388108	0.161214	1.37908	0.0850142	0.134234
DENS20	0.286134	0.399759	0.376194	0.504222	0.464046	0.277457	0.0798227	0.141485	0.125377	0.0109609	-0.203536	0.211821	0.269614	0.296666	0.0790768	0.0279734	-0.0852744			0.397106	-0.0589468	0.340322	-0.0796793	-0.402091	-0.712306	0.77249	-0.113847	-0.912576	-19.5693	-2.0407	0.272838	0.100338	-0.733449	-0.64625	-4.04841
DENS21	0.218562	0.338578	0.327358	0.463264	0.422522	0.395504	0.301646	0.329219	0.323924	-0.293741	-0.351054	-0.0463348	0.368266	0.206817	0.0415024	0.0291721	-0.0255139			0.549114	-0.0331385	0.415161	-0.0879456	-0.0639456	-0.237312	0.0914071	-0.0160822	-1.90682	0.195113	-0.868013	-8.94795	-0.438403	-0.799328	-0.297098	-1.8746
DENS22	0.221768	0.31474	0.281759	0.280326	0.166751	0.214459	-0.214095	-0.174723	-0.147064	-0.244321	-0.328086	-0.137485	-0.0338625	0.0669171	-0.00089686	-0.00824382	-0.0613307			0.41923	-0.104787	-0.00508546	-0.405154	0.2861	-1.99831	-0.183901	-0.158303	0.661325	0.34285	-0.580948	-0.753701	-2.97614	-1.0134	8.19187	6.4396
DENS23	-0.00629614	0.0442354	-0.00993433	0.0969791	-0.170923	0.0192272	-0.168464	-0.44667	-0.471365	-0.325987	-0.341308	-0.244355	-0.552296	-0.138658	-0.277827	-0.358304	-0.310381			-8.0258	-1.22458	-10.762	-2.76247	-1.11249	-9.76177	1.65142	0.0552874	-0.30842	0.0470016	-0.284063	1.26022	-0.748944	1.00369	0.289666	-0.13375
DENS24	-0.635862	-0.630851	-0.6532	-0.539992	-0.669923	-0.742532	-0.738856	-0.777397	-0.815744	-0.717721	-0.830258	-0.657304	-0.774466	-0.77226	-0.81892	-0.844522	-0.842996			-0.00788004	0.0354259	-0.173312	0.240617	0.108383	-0.00495071	0.0521634	0.0493277	-0.120164	0.156798	-0.208314	0.178247	-0.00284829	0.0604193	0.031263	-0.00180699
DENS25	-0.195498	-0.0893281	-0.130333	-0.26598	-0.278319	-0.330112	-0.464526	-0.446232	-0.460241	-0.446153	-0.549087	-0.105669	-0.0352492	-0.103947	-0.179442	-0.194181	-0.196664			-0.543075	0.459037	1.04078	0.046389	0.186091	0.407176	-0.0393811	0.0313949	-0.0306099	0.230712	-0.807554	-0.66642	1.94891	0.726287	0.082137	0.0127866
DENS26	-0.0808104	0.0620632	0.178682	0.212712	0.147502	0.117716	0.181801	0.17113	0.106518	-0.182956	-0.231969	-0.00238424	0.127335	-0.0832867	-0.232429	-0.25485	-0.271661			-1.76801	1.87903	0.190453	-0.306566	-0.201936	0.544403	-0.0586938	-0.37756	-2.7176	0.267898	-0.989722	-54.4071	-1.65408	1.79071	0.0964613	0.0659647
DENS27	-0.0287668	0.100648	0.262225	0.253811	0.188038	0.146172	0.190461	0.192549	0.133573	-0.177405	-0.227494	-0.0784786	0.0515381	-0.0703723	-0.237469	-0.250349	-0.271598			-4.49876	1.60536	-0.0320845	-0.259142	-0.222647	0.302994	0.0109634	-0.306294	-2.32815	0.282345	-0.65503	-1.65672	-2.36544	2.37446	0.0542403	0.0848749
DENS28	-0.00231896	0.124217	0.295601	0.291918	0.24172	0.178974	0.246062	0.228907	0.171885	-0.169265	-0.223053	-0.0355322	0.133866	-0.0624332	-0.22728	-0.246223	-0.270048			-54.5657	1.37971	-0.0124596	-0.171958	-0.25958	0.374844	-0.0697171	-0.249107	-1.98476	0.317775	-0.840701	-4.76746	-1.46639	2.64037	0.0833448	0.0967643
DENS29	0.406233	0.417872	0.366398	0.536294	0.538045	0.485635	0.386783	0.435691	0.43892	-0.383349	-0.447187	0.0172766	0.472375	0.395794	0.242312	0.18877	0.189025			0.0286513	-0.12318	0.46369	0.00326506	-0.0974081	-0.203553	0.12645	0.00741123	-1.87339	0.166527	-1.03863	26.3419	-0.16212	-0.387783	-0.220963	0.00134955
DENS30	0.0776427	0.226661	0.397514	0.38303	0.327254	0.280456	0.349559	0.343371	0.284862	-0.167673	-0.250753	0.0496459	0.23342	0.0145325	-0.266973	-0.300108	-0.32669			1.91928	0.753785	-0.0364365	-0.145618	-0.143002	0.246394	-0.0177029	-0.170397	-1.58861	0.495481	-1.19799	3.7017	-0.937741	-19.3708	0.124111	0.0885769
DENS31	0.0320488	0.174517	0.329167	0.339137	0.257034	0.220633	0.266061	0.26507	0.193749	-0.168889	-0.225062	-0.0323653	0.153197	-0.0398164	-0.199617	-0.231412	-0.262056			4.44534	0.88616	0.03029	-0.242095	-0.141617	0.205896	-0.00372227	-0.269065	-1.87169	0.332603	-0.856194	-5.73337	-1.2599	4.01344	0.15928	0.132421
DENS32	-0.0540363	0.0817339	0.252846	0.255524	0.189759	0.164781	0.229451	0.216536	0.139107	-0.165958	-0.220954	-0.0421558	0.0861369	-0.0781405	-0.233667	-0.254425	-0.271648			-2.51257	2.09353	0.0105893	-0.25737	-0.131632	0.392462	-0.0562888	-0.357578	-2.19302	0.331384	-0.80921	-3.0433	-1.90717	1.99034	0.0888379	0.0676928
DENS33	0.0459993	0.188564	0.356894	0.343645	0.263804	0.222514	0.225886	0.283558	0.214581	-0.123243	-0.197881	0.0267968	0.126096	-0.000445595	-0.175146	-0.220934	-0.242609			3.09928	0.892699	-0.0371244	-0.232336	-0.156517	0.0151525	0.255314	-0.243255	-1.57434	0.605622	-1.13542	3.70564	-1.00353	392.06	0.261433	0.098106
DENS34	0.08791	0.211588	0.376585	0.377143	0.316373	0.275294	0.336326	0.333591	0.27708	-0.112136	-0.180068	0.0701687	0.211354	0.03128	-0.181229	-0.215291	-0.225559			1.40687	0.779801	0.00148069	-0.16113	-0.129844	0.221698	-0.00813356	-0.169403	-1.40471	0.605797	-1.38968	2.01208	-0.852002	-6.79377	0.187947	0.0476938
DENS35																				#DIV/0!	#DIV/0!	#DIV/0!	#DIV/0!	#DIV/0!	#DIV/0!	#DIV/0!	#DIV/0!	#DIV/0!	#DIV/0!	#DIV/0!	#DIV/0!	#DIV/0!	#DIV/0!	#DIV/0!	#DIV/0!
SPAS1	0.383175	0.271775	0.363355	0.333543	0.277784	0.21469	0.192451	0.22543	0.125996	0.172669	0.165611	0.449912	0.41108	0.55137	0.406328	0.227894	0.395425			-0.290729	0.33697	-0.0820462	-0.167173	-0.227133	-0.103585	0.171362	-0.441087	0.370436	-0.0408796	1.71669	-0.0863104	0.341272	-0.263056	-0.439139	0.735132
SPAS2	-0.197834	-0.242623	-0.197171	-0.193545	-0.23664	-0.25696	-0.244717	-0.232353	-0.225111	-0.21689	-0.230101	-0.126539	-0.110234	-0.0230433	-0.125773	-0.271488	-0.123088			0.226398	-0.187333	-0.0183923	0.222663	0.0858674	-0.0476452	-0.0505224	-0.0311701	-0.0365199	0.0609108	-0.45007	-0.128853	-0.790961	4.45811	1.15855	-0.546618
SPAS3	0.534798	0.428875	0.49269	0.460742	0.406411	0.343347	0.332676	0.36044	0.25853	0.311723	0.304792	0.563137	0.541069	0.636038	0.50032	0.304336	0.47498			-0.198062	0.148796	-0.064844	-0.117921	-0.155172	-0.0310792	0.0834543	-0.282737	0.205754	-0.0222368	0.847613	-0.0391868	0.17552	-0.21338	-0.391717	0.560708
SPAS4	0.142543	0.03452	0.122516	0.0963087	0.0357067	-0.008489	-0.0327595	-0.0231893	-0.0741428	-0.0492969	-0.0710943	0.082868	0.0573542	-0.336597	-0.44081	-0.432173	-0.185866			-0.757827	2.54914	-0.21391	-0.629247	-1.23774	2.85906	-0.292135	2.19728	-0.335108	0.442164	-2.16561	-0.307884	-6.86874	0.309606	-0.0195915	-0.569927
SPAS5	0.0485213	-0.0172012	0.0232846	-0.00576853	-0.344702	-0.29954	-0.331411	-0.413815	-0.395963	-0.145203	-0.250245	-0.0320362	-0.0285373	-0.00591489	-0.0448386	-0.164864	-0.0509726			-1.35451	-2.35366	-1.24774	58.7555	-0.131017	0.106401	0.248646	-0.0431407	-0.633291	0.723414	-0.871981	-0.109217	-0.792731	6.58062	2.67683	-0.69082
SPAS6	0.0694992	-0.010409	0.0610943	0.0625208	0.00639823	-0.0306883	-0.0550571	-0.0537462	-0.0897644	-0.0718654	-0.0883312	0.0930751	0.0681289	0.124555	0.0431564	-0.0616117	0.0343209			-1.14977	-6.86937	0.023348	-0.897662	-5.79637	0.794075	-0.0238089	0.670151	-0.199399	0.22912	-2.05371	-0.268023	0.828225	-0.653515	-2.42764	-1.55705
SPAS7	0.109958	-0.0771349	0.123776	0.0559657	-0.0601462	-0.147776	-0.207364	-0.176471	-0.244718	-0.231985	-0.249591	0.136501	0.141146	0.239287	0.0727718	-0.144079	0.0681037			-1.70149	-2.60466	-0.547845	-2.0747	1.45695	0.40323	-0.148983	0.386738	-0.0520332	0.0758919	-1.5469	0.0340285	0.695315	-0.69588	-2.97987	-1.47268
SPAS8	-0.737089	-0.796511	-0.825472	-0.858739	-0.893028	-0.899954	-0.899036	-0.890049	-0.907843	-0.895456	-0.900079	-0.812688	-0.899013	-0.866402	-0.877053	-0.894731	-0.904442			0.0806161	0.0363602	0.0403002	0.03993	0.00775513	-0.00101928	-0.0099963	0.0199913	-0.0136436	0.00516239	-0.097093	0.106222	-0.0362745	0.0122943	0.0201555	0.0108535
SPAS9	0.110964	-0.0761433	-0.0297176	-0.131814	-0.22075	-0.323784	-0.324368	-0.293262	-0.36735	-0.336765	-0.362207	-0.211102	0.0161157	0.175023	-0.0707245	-0.299758	-0.0891545			-1.6862	-0.609714	3.43554	0.674712	0.466745	0.00180276	-0.095896	0.252633	-0.0832585	0.0755504	-0.417179	-1.07634	9.86037	-1.40409	3.2384	-0.702579
SPAS10	0.0518099	-0.0680818	-0.0236848	-0.0776414	-0.140374	-0.202301	-0.204823	-0.194585	-0.241888	-0.222806	-0.247144	-0.0341587	-0.0373774	0.107505	-0.0670047	-0.255636	-0.0707496			-2.31407	-0.652113	2.27811	0.807979	0.441155	0.0124703	-0.049985	0.243095	-0.078887	0.109233	-0.861786	0.0942259	-3.8762	-1.62327	2.81519	-0.72324
SPAS11	-0.0418594	-0.237489	-0.228943	-0.291205	-0.361535	-0.381096	-0.381316	-0.345002	-0.405359	-0.381347	-0.393702	-0.225928	-0.268261	-0.129889	-0.300287	-0.450915	-0.309976			4.67348	-0.0359836	0.271955	0.241515	0.0541038	0.000578545	-0.0952355	0.174947	-0.0592355	0.0323982	-0.426144	0.187374	-0.515813	1.31188	0.501617	-0.312562
SPAS12	0.127562	-0.0788251	-0.0727862	-0.280713	-0.477106	-0.424852	-0.420542	-0.312901	-0.407802	-0.349614	-0.353919	-0.216773	-0.0535895	0.0475754	-0.287256	-0.402233	-0.150398			-1.61793	-0.0766116	2.85668	0.699621	-0.109523	-0.0101443	-0.255958	0.303291	-0.142685	0.0123131	-0.387507	-0.752785	-1.88777	-7.03791	0.400262	-0.626092
SPAS13	0.185737	0.0356055	0.030346	-0.139755	-0.307173	-0.252831	-0.253228	-0.171156	-0.257483	-0.213663	-0.223002	-0.0560737	0.101938	0.170127	-0.143648	-0.267756	-0.0564067			-0.808301	-0.147717	-5.60539	1.19794	-0.176908	0.00156775	-0.324104	0.504376	-0.170185	0.0437112	-0.748551	-2.81793	0.668923	-1.84436	0.863978	-0.789336
SPAS14	0.155413	-0.00395267	0.0217283	-0.139475	-0.316837	-0.279015	-0.284074	-0.215884	-0.289771	-0.250354	-0.261549	-0.12292	0.00667954	0.0638945	-0.190652	-0.284846	-0.120131			-1.02543	-6.49713	-7.41902	1.27164	-0.119374	0.018133	-0.240042	0.342253	-0.13603	0.0447171	-0.53003	-1.05434	8.5657	-3.98386	0.494062	-0.57826
SPAS15	-0.0742185	0.0729099	-0.0361214	-0.107317	-0.198126	-0.18134	-0.279532	-0.312809	-0.348425	-0.375983	-0.420959	-0.414033	-0.307735	-0.423556	-0.419698	-0.601649	-0.601747			-1.98237	-1.49542	1.97101	0.846175	-0.0847209	0.541481	0.119044	0.11386	0.0790913	0.119624	-0.0164541	-0.256738	0.376365	-0.00910893	0.43353	0.000162149
SPAS16	0.0987226	-0.023643	0.151389	0.139308	0.0309648	0.0173961	-0.0199055	-0.010338	-0.0628396	-0.0411508	-0.0589792	0.106222	0.0886625	0.146405	0.0704367	-0.0430046	0.0671978			-1.23949	-7.40313	-0.0798031	-0.777724	-0.438199	-2.14425	-0.480648	5.07852	-0.345145	0.433243	-2.80101	-0.165309	0.651259	-0.51889	-1.61054	-2.56257
SPAS17	-0.434073	-0.548498	-0.499124	-0.555119	-0.643802	-0.676939	-0.677882	-0.60807	-0.687454	-0.63601	-0.635736	-0.50486	-0.572961	-0.432376	-0.644493	-0.755564	-0.658627			0.263609	-0.0900167	0.112186	0.159756	0.0514696	0.00139408	-0.102986	0.130551	-0.0748329	-0.000429813	-0.205865	0.13489	-0.245367	0.490585	0.172339	-0.128298
SPAS18	0.71379	0.616388	0.615207	0.439929	0.323666	0.256925	0.201524	0.25474	0.142706	0.190189	0.184341	0.485996	0.475799	0.568894	0.41435	0.215309	0.412727			-0.136457	-0.00191654	-0.284909	-0.264278	-0.206203	-0.215632	0.264071	-0.439798	0.332732	-0.030747	1.63639	-0.0209809	0.19566	-0.271657	-0.480368	0.916903
SPAS19	0.266457	0.148807	0.225218	0.183002	0.121248	0.0697497	0.0377825	0.0600409	-0.0330948	0.0292239	0.00223045	0.225535	0.202272	0.267842	0.124412	-0.0415932	0.1069			-0.441535	0.513489	-0.187446	-0.337452	-0.424734	-0.458312	0.589116	-1.5512	-1.88304	-0.923677	100.117	-0.103145	0.324167	-0.535503	-1.33432	-3.57013
SPAS20	0.358837	0.201108	0.391019	0.405106	0.33372	0.264779	0.219954	0.273094	0.164567	0.195202	0.179822	0.523702	0.504869	0.57797	0.439384	0.263156	0.42583			-0.439557	0.944324	0.0360261	-0.176215	-0.206583	-0.169294	0.241597	-0.397398	0.186154	-0.0787867	1.91233	-0.0359609	0.144792	-0.23978	-0.401081	0.61817
SPAS21	0.204705	0.00252827	0.273619	0.251084	0.134777	0.032063	-0.0460081	0.023917	-0.106435	-0.071556	-0.0906536	0.348529	0.330994	0.448627	0.253947	0.00100598	0.21015			-0.987649	107.224	-0.0823588	-0.46322	-0.762104	-2.43493	-1.51984	-5.4502	-0.327705	0.26689	-4.84462	-0.0503108	0.355391	-0.433946	-0.996039	207.9
SPAS22	0.569597	0.466826	0.541133	0.518425	0.457605	0.395253	0.364084	0.402019	0.292099	0.331487	0.318805	0.60082	0.577565	0.565953	0.465324	0.29195	0.444582			-0.180429	0.159175	-0.0419638	-0.117317	-0.136257	-0.0788586	0.104194	-0.273421	0.134844	-0.0382571	0.884603	-0.0387053	-0.0201063	-0.177804	-0.372587	0.522798
SPAS23	-0.131256	-0.211985	0.245995	0.387204	0.345498	0.305824	0.267039	0.285208	0.220484	0.236576	0.218386	0.463688	0.430562	0.452295	0.38808	0.295969	0.397808			0.615057	-2.16043	0.574034	-0.107711	-0.114832	-0.126821	0.068039	-0.226934	0.0729842	-0.0768899	1.12325	-0.0714409	0.0504773	-0.141976	-0.23735	0.344085
SPAS24	0.0461217	0.0320364	0.0683156	0.0738955	0.0486401	0.0186998	0.0070651	0.00445394	-0.0293534	0.00459791	-0.00915577	0.0227352	0.0226957	0.0284863	-0.00657271	-0.0512522	-0.0145404			-0.305394	1.13244	0.081679	-0.341772	-0.615547	-0.622183	-0.369587	-7.59044	-1.15664	-2.99129	-3.48315	-0.00173766	0.255143	-1.23073	6.79772	-0.716297
SPAS25	-0.0520627	-0.0815035	0.122812	-0.0513913	-0.0433768	-0.233996	-0.211011	-0.287579	-0.329893	-0.300911	-0.340007	-0.0274074	0.198173	0.217285	-0.130089	-0.185111	-0.293567			0.565489	-2.50683	-1.41846	-0.155951	4.39451	-0.0982285	0.362862	0.147137	-0.0878505	0.129922	-0.919391	-8.23064	0.0964416	-1.5987	0.42296	0.585897
SPAS26	0.0763034	-0.0432465	0.298844	0.368119	0.335412	0.278906	0.248435	0.268044	0.191158	0.241637	0.218946	0.458135	0.432338	0.453071	0.355779	0.233312	0.354204			-1.56677	-7.91025	0.231809	-0.0888479	-0.168468	-0.109252	0.0789312	-0.286844	0.264072	-0.0939054	1.09246	-0.0563089	0.0479548	-0.214739	-0.344224	0.518159
SPAS27	0.308095	0.199619	0.308302	0.268082	0.204752	0.148342	0.101589	0.126012	0.030245	0.098284	0.0724543	0.296688	0.278141	0.358893	0.216402	0.0480885	0.216197			-0.352085	0.544452	-0.130457	-0.236234	-0.275502	-0.315174	0.240415	-0.759984	2.2496	-0.262807	3.09483	-0.062512	0.290325	-0.397029	-0.777781	3.49582
SPAS28	0.429957	0.332851	0.333389	0.287494	0.233939	0.182535	0.152596	0.176163	0.0832013	0.140028	0.11752	0.35954	0.3374	0.403075	0.255663	0.0727479	0.260878			-0.225851	0.00161759	-0.137663	-0.186282	-0.219733	-0.164016	0.154441	-0.527704	0.683007	-0.160741	2.0594	-0.0615791	0.19465	-0.365718	-0.715454	2.58605
SPAS29	0.598836	0.51442	0.591033	0.398521	0.292917	0.26353	0.233393	0.268509	0.19949	0.204745	0.186949	0.426238	0.406838	0.505599	0.387596	0.218125	0.381269			-0.140967	0.148931	-0.325721	-0.26499	-0.100325	-0.114357	0.150456	-0.257045	0.0263415	-0.0869197	1.27998	-0.0455155	0.242753	-0.233393	-0.437236	0.747937
SPAS30	0.474319	0.337624	0.445984	0.404611	0.341917	0.282648	0.245124	0.291297	0.177608	0.228244	0.208997	0.503982	0.486858	0.498096	0.355718	0.199979	0.389839			-0.288192	0.32095	-0.0927691	-0.154948	-0.173343	-0.13276	0.188366	-0.390286	0.285098	-0.0843226	1.41143	-0.0339774	0.0230816	-0.285843	-0.437818	0.949403
SPAS31	0.2566	0.116409	0.272975	0.256608	0.174885	0.0982676	0.0529181	0.100895	0.0112711	0.0333433	0.0204358	0.370435	0.347904	0.412889	0.274037	0.0966597	0.263942			-0.54634	1.34496	-0.0599571	-0.318475	-0.438101	-0.46149	0.906623	-0.888289	1.9583	-0.387108	17.1267	-0.060823	0.186791	-0.336295	-0.647274	1.73064
SPAS32	0.292284	0.19765	0.207654	-0.0437194	-0.14621	-0.224301	-0.256053	-0.233584	-0.28054	-0.251218	-0.269276	0.0321462	0.0448133	0.149569	0.0842317	-0.103093	0.123846			-0.323775	0.0506191	-1.21054	2.34428	0.5341	0.141561	-0.0877525	0.201024	-0.10452	0.0718813	-1.11938	0.394045	2.33761	-0.436838	-2.22392	-2.2013
SPAS33	0.298052	0.167379	0.301138	0.291944	0.242635	0.194716	0.148056	0.184619	0.103567	0.105906	0.0781694	0.336522	0.313899	0.440264	0.346899	0.191244	0.346115			-0.438424	0.799137	-0.0305324	-0.168896	-0.197495	-0.239629	0.246948	-0.439021	0.0225772	-0.261894	3.30503	-0.0672267	0.402567	-0.212066	-0.448703	0.809807
SPAS34	0.342985	0.259104	0.289271	0.165524	0.0687066	-0.0103598	-0.063555	-0.0135485	-0.124812	-0.0943163	-0.111619	0.299379	0.28559	0.387359	0.221047	0.0979779	0.312176			-0.244561	0.116428	-0.427791	-0.584914	-1.15078	5.13474	-0.786822	8.21227	-0.244336	0.183454	-3.68215	-0.0460607	0.356349	-0.429349	-0.556755	2.18619
SPAS35																				#DIV/0!	#DIV/0!	#DIV/0!	#DIV/0!	#DIV/0!	#DIV/0!	#DIV/0!	#DIV/0!	#DIV/0!	#DIV/0!	#DIV/0!	#DIV/0!	#DIV/0!	#DIV/0!	#DIV/0!	#DIV/0!
ESTS1	-0.0449966	-0.0304331	0.116607	0.0284304	-0.272958	-0.327387	-0.168575	-0.0765368	-0.1901	-0.406178	-0.397098	0.225944	0.0533948	-0.170239	-0.11039	-0.258775	-0.42069			-0.323658	-4.8316	-0.756187	-10.6009	0.199402	-0.485089	-0.545978	1.48377	1.13665	-0.0223556	-1.56899	-0.763681	-4.1883	-0.351556	1.34418	0.6257
ESTS2	-0.232974	-0.329066	-0.322874	-0.292524	-0.351607	-0.340356	-0.331224	-0.313502	-0.318325	-0.355172	-0.347692	-0.0962112	-0.183034	-0.282889	-0.237217	-0.289526	-0.269515			0.412459	-0.0188154	-0.0940002	0.201976	-0.0319983	-0.0268329	-0.053504	0.0153859	0.115753	-0.0210611	-0.723286	0.902422	0.545552	-0.161448	0.22051	-0.0691151
ESTS3	-0.170669	0.053212	-0.0959511	-0.114587	-0.308707	-0.130454	-0.0229414	0.142939	0.110377	-0.317617	-0.392176	0.180019	-0.138256	-0.122563	-0.246247	-0.417168	-0.229041			-1.31178	-2.80318	0.19422	1.69409	-0.577418	-0.824142	-7.23062	-0.227807	-3.87758	0.234744	-1.45903	-1.76801	-0.113502	1.00914	0.694105	-0.450963
ESTS4	-0.175694	-0.400043	-0.323146	-0.424203	-0.44666	-0.405612	-0.354895	-0.326111	-0.318748	-0.326841	-0.325253	-0.0254947	-0.0884568	-0.287874	-0.211971	-0.228536	-0.216284			1.27693	-0.192223	0.312729	0.0529394	-0.0919009	-0.125038	-0.0811053	-0.0225763	0.0253899	-0.00486137	-0.921616	2.46962	2.2544	-0.263667	0.0781469	-0.0536128
ESTS5	-0.248063	-0.283659	-0.188182	-0.140394	-0.193133	-0.231126	-0.237713	-0.264229	-0.279185	-0.194672	-0.215125	-0.0801899	-0.112515	-0.159521	-0.131799	-0.161091	-0.178653			0.143494	-0.33659	-0.253945	0.37565	0.196719	0.0284971	0.111546	0.0566039	-0.302713	0.105064	-0.62724	0.403111	0.417773	-0.173781	0.222248	0.109018
ESTS6	0.0443847	0.124475	0.192349	0.127896	0.0903772	0.010171	-0.0410368	0.0588603	0.119068	0.136538	0.0845179	0.0406597	-0.208449	-0.286185	-0.3977	-0.379453	0.0152727			1.80445	0.545283	-0.335084	-0.293352	-0.887461	-5.0347	-2.43433	1.0229	0.14672	-0.380995	-0.518921	-6.12666	0.372927	0.389661	-0.0458806	-1.04025
ESTS7	-0.456437	-0.446448	-0.432685	-0.439603	-0.347677	-0.383755	-0.362615	-0.382499	-0.411846	-0.43181	-0.430799	0.0417891	-0.320579	-0.210178	-0.186838	-0.242631	-0.211638			-0.0218834	-0.0308288	0.0159897	-0.209112	0.10377	-0.0550881	0.054834	0.0767258	0.0484736	-0.00234193	-1.097	-8.67136	-0.344381	-0.111048	0.298617	-0.127739
ESTS8	-0.154045	-0.220896	-0.221499	-0.194411	-0.231361	-0.224921	-0.212464	-0.207362	-0.207997	-0.254348	-0.251335	-0.217661	-0.225638	-0.18556	-0.157722	-0.225766	-0.200391			0.433971	0.00273144	-0.122295	0.190063	-0.0278347	-0.055383	-0.0240173	0.0030637	0.222846	-0.0118487	-0.133978	0.0366457	-0.17762	-0.15002	0.431414	-0.112396
ESTS9	-0.56126	-0.627319	-0.609784	-0.564396	-0.626273	-0.628156	-0.617194	-0.614136	-0.648061	-0.643509	-0.63833	-0.549127	-0.552699	-0.545931	-0.496199	-0.495279	-0.634994			0.117697	-0.0279529	-0.0744317	0.109634	0.00300643	-0.0174509	-0.00495463	0.0552398	-0.00702385	-0.00804817	-0.139745	0.00650558	-0.0122462	-0.0910958	-0.00185381	0.282093
ESTS10	-0.261525	-0.402255	-0.252311	-0.269737	-0.362729	-0.38263	-0.305551	-0.338455	-0.32637	-0.381111	-0.380076	-0.162077	-0.240588	-0.248036	-0.349737	-0.395417	-0.534213			0.538117	-0.37276	0.0690672	0.344749	0.0548666	-0.201445	0.107684	-0.0357039	0.167725	-0.00271467	-0.573566	0.484401	0.0309572	0.410027	0.130611	0.351011
ESTS11	-0.22648	-0.35599	-0.334285	-0.31093	-0.364541	-0.378742	-0.375247	-0.324779	-0.336133	-0.366786	-0.365694	-0.0367666	-0.160666	-0.303079	-0.255399	-0.330327	-0.278536			0.571836	-0.060971	-0.0698665	0.172422	0.0389551	-0.00922744	-0.134493	0.0349596	0.0911927	-0.00297805	-0.899461	3.3699	0.886389	-0.157319	0.293374	-0.156787
ESTS12	-0.725656	-0.74109	-0.607736	-0.721942	-0.734998	-0.667579	-0.677305	-0.654322	-0.658467	-0.655899	-0.649092	-0.629336	-0.638483	-0.568507	-0.578254	-0.555619	-0.51108			0.0212685	-0.179942	0.18792	0.0180841	-0.0917262	0.0145694	-0.0339331	0.00633427	-0.00390046	-0.0103769	-0.0304375	0.0145354	-0.109598	0.0171452	-0.0391443	-0.080161
ESTS13	-0.369297	-0.39964	-0.0145095	-0.227041	-0.301461	-0.226482	-0.125553	-0.0761429	-0.0260535	-0.186209	-0.298691	-0.16094	-0.200203	-0.28236	-0.243879	-0.314439	-0.266004			0.0821647	-0.963694	14.6478	0.327779	-0.24872	-0.445636	-0.393541	-0.657834	6.14716	0.604062	-0.461181	0.243962	0.410366	-0.136283	0.289324	-0.154037
ESTS14	-0.699034	-0.716699	-0.780443	-0.83964	-0.848245	-0.835646	-0.822331	-0.840588	-0.848684	-0.849113	-0.856504	-0.826696	-0.881913	-0.873192	-0.841835	-0.846331	-0.642794			0.0252711	0.088941	0.0758499	0.0102484	-0.0148533	-0.0159336	0.0222018	0.00963168	0.000505497	0.00870353	-0.0348011	0.0667925	-0.00988931	-0.0359108	0.00534127	-0.240493
ESTS15	-0.265153	-0.243994	-0.239233	-0.26832	-0.393894	-0.347779	-0.442879	-0.235272	-0.234096	-0.289801	-0.283328	-0.3272	-0.251071	-0.256227	-0.229999	-0.271184	-0.260335			-0.0798006	-0.0195134	0.121587	0.467999	-0.117074	0.27345	-0.468767	-0.00499784	0.237957	-0.0223367	0.154844	-0.232665	0.0205338	-0.10236	0.179063	-0.0400067
ESTS16	-0.118981	-0.0574251	-0.020901	-0.0677981	-0.110377	-0.15351	-0.170137	-0.129763	-0.0937239	-0.156378	-0.214832	0.0595079	-0.0187493	-0.233873	-0.205124	-0.278678	-0.230553			-0.517358	-0.636031	2.24377	0.62803	0.390772	0.108317	-0.237305	-0.277729	0.668495	0.373803	-1.277	-1.31507	11.4737	-0.122924	0.358581	-0.172692
ESTS17	-0.497067	-0.584452	-0.441276	-0.291356	0.0389891	-0.0266304	-0.507809	-0.109035	-0.131422	0.0247385	-0.0158787	-0.187041	-0.134088	-0.276033	-0.232378	-0.285149	-0.171974			0.175802	-0.244975	-0.339742	-1.13382	-1.68302	18.0688	-0.785284	0.205317	-1.18824	-1.64186	10.7794	-0.28311	1.0586	-0.15815	0.227088	-0.396896
ESTS18	-0.287053	-0.223545	0.211622	0.105559	-0.0450826	-0.165663	-0.157209	0.110953	0.0560603	-0.128199	-0.128807	0.413672	0.365706	0.125036	0.139519	-0.0652229	0.0919544			-0.221239	-1.94666	-0.50119	-1.42709	2.67465	-0.0510286	-1.70576	-0.494737	-3.28681	0.00474359	-4.21156	-0.115951	-0.658096	0.115831	-1.46748	-2.40985
ESTS19	-0.189121	-0.160673	-0.0152982	0.00936806	-0.0629418	-0.112654	-0.0905105	-0.0147371	0.00118665	-0.09508	-0.16749	-0.0307963	-0.146432	-0.303493	-0.253562	-0.318569	-0.279901			-0.150425	-0.904787	-1.61236	-7.71877	0.789818	-0.196565	-0.837178	-1.08052	-81.1245	0.761568	-0.81613	3.75485	1.07259	-0.164519	0.256375	-0.12138
ESTS20	0.0755721	-0.0789255	0.0758753	-0.0295859	-0.165873	-0.220615	-0.234208	-0.0534168	-0.0917595	-0.186249	-0.227849	0.281473	0.222079	-0.115633	-0.0812557	-0.226333	-0.116145			-2.04437	-1.96135	-1.38993	4.60649	0.330023	0.061613	-0.771926	0.717803	1.02975	0.223357	-2.23535	-0.21101	-1.52068	-0.297297	1.78544	-0.486838
ESTS21	-0.104641	-0.061706	0.238466	0.241438	0.12517	0.0388251	0.0746086	0.228622	0.204063	0.119792	0.0471903	0.349569	0.238735	-0.0229673	0.0295471	-0.13344	-0.0148354			-0.410308	-4.86455	0.0124642	-0.481564	-0.689821	0.921656	2.06428	-0.107421	-0.412968	-0.606064	6.40765	-0.317059	-1.0962	-2.28649	-5.51616	-0.888823
ESTS22	-0.0913976	-0.0524777	-0.0190387	-0.0437083	-0.169255	-0.0094713	0.0351896	0.168551	0.137662	-0.176365	-0.194039	0.111486	-0.0644014	-0.142775	-0.159477	-0.23177	-0.05742			-0.425831	-0.637203	1.29576	2.87238	-0.944041	-4.7154	3.78978	-0.183257	-2.28114	0.100214	-1.57455	-1.57766	1.21695	0.116981	0.453314	-0.752254
ESTS23	-0.0932327	-0.383555	-0.359051	-0.341093	-0.492463	-0.553332	-0.537054	-0.358742	-0.402558	-0.490813	-0.503524	-0.27233	-0.27166	-0.14362	-0.128676	-0.246962	-0.158322			3.11396	-0.0638866	-0.0500152	0.443776	0.123602	-0.0294179	-0.332019	0.122141	0.219235	0.0258974	-0.459152	-0.00245962	-0.471323	-0.104055	0.919256	-0.358922
ESTS24	0.126058	-0.0428867	-0.141083	-0.0574852	-0.145533	-0.228913	-0.206187	-0.0368627	-0.0454797	-0.113596	-0.197548	0.0228053	-0.0228632	-0.225468	-0.187552	-0.252132	-0.214542			-1.34021	2.28967	-0.592544	1.53166	0.572928	-0.0992767	-0.821217	0.233759	1.49773	0.739044	-1.11544	-2.00254	8.86162	-0.168165	0.344327	-0.149088
ESTS25	-0.131972	-0.266867	-0.239809	-0.238842	-0.295524	-0.336428	-0.32672	-0.252153	-0.262794	-0.286704	-0.296782	-0.10075	-0.122877	-0.202293	-0.164224	-0.213105	-0.180285			1.02215	-0.101392	-0.00403024	0.23732	0.138411	-0.0288582	-0.228229	0.0422009	0.0909836	0.035154	-0.660526	0.219624	0.646305	-0.188187	0.29765	-0.154011
ESTS26	0.132028	-0.17677	-0.150411	-0.156565	-0.304351	-0.375232	-0.364549	-0.163396	-0.198295	-0.276979	-0.282893	0.161781	0.137783	-0.184232	-0.112562	-0.257646	-0.181939			-2.33889	-0.149112	0.0409089	0.94393	0.232894	-0.02847	-0.551785	0.213584	0.396803	0.0213495	-1.57188	-0.148339	-2.33712	-0.389022	1.28893	-0.29384
ESTS27	-0.133635	-0.129521	0.0653309	-0.045261	0.00626513	-0.0582313	-0.0481073	-0.0544812	-0.00591793	-0.048702	-0.204752	0.0327724	-0.100999	-0.549287	-0.410926	-0.267765	-0.352035			-0.0307844	-1.5044	-1.6928	-1.13842	-10.2945	-0.173858	0.132494	-0.891377	7.22956	3.20418	-1.16006	-4.08182	4.43856	-0.251892	-0.348386	0.314717
ESTS28	-0.0987596	-0.0745638	0.110661	0.138569	0.0360525	-0.0280969	0.0050187	-0.00197744	0.0433044	-0.0194689	-0.0941157	0.0362477	-0.111316	-0.297762	-0.242491	-0.342343	-0.241166			-0.244997	-2.48411	0.252187	-0.739822	-1.77933	-1.17862	-1.39401	-22.8992	-1.44958	3.83415	-1.38514	-4.07098	1.67492	-0.185623	0.411777	-0.295541
ESTS29	-0.260354	-0.195622	0.140274	0.128454	-0.013552	-0.101441	-0.109657	0.086784	0.0565399	-0.0682073	-0.100254	0.436314	0.37292	0.132187	0.159375	0.0104496	0.15345			-0.248631	-1.71706	-0.084264	-1.1055	6.48534	0.0809878	-1.79142	-0.348499	-2.20636	0.469842	-5.35209	-0.145294	-0.645535	0.205678	-0.934434	13.6848
ESTS30	-0.089274	-0.0445972	0.182091	0.187342	0.0757971	-0.00963277	0.0170047	0.0472545	0.102048	0.0594687	-0.0417503	0.132966	-0.0584235	-0.325662	-0.220702	-0.381328	-0.224252			-0.500446	-5.08301	0.0288406	-0.595409	-1.12709	-2.76529	1.77891	1.15955	-0.41725	-1.70206	-4.1848	-1.43939	4.57416	-0.322299	0.727797	-0.411918
ESTS31	-0.296286	-0.227845	0.111628	0.102773	-0.0489799	-0.142978	-0.131633	0.0547229	0.0623894	-0.0823781	-0.183965	0.178868	0.0167731	-0.266713	-0.232632	-0.311948	-0.219188			-0.230996	-1.48993	-0.0793258	-1.47658	1.91911	-0.0793462	-1.41572	0.140098	-2.32039	1.23317	-1.97229	-0.906226	-16.9012	-0.127781	0.340948	-0.297355
ESTS32	-0.285432	-0.354463	-0.293527	-0.253183	-0.0505974	-0.0922495	-0.356435	-0.102465	-0.0889243	-0.199158	-0.151787	-0.0503202	-0.179295	-0.294824	-0.249315	-0.313465	-0.278852			0.24185	-0.17191	-0.137446	-0.800155	0.823206	2.86382	-0.712529	-0.132147	1.23963	-0.237854	-0.668482	2.56308	0.64435	-0.154362	0.257307	-0.110422
ESTS33	-0.291061	-0.356318	-0.308202	-0.262853	-0.0507361	-0.111816	-0.372291	-0.0961704	-0.0843591	-0.0827955	-0.14231	-0.0628201	-0.0442257	-0.226912	-0.206348	-0.285982	-0.384368			0.224204	-0.135037	-0.14714	-0.806979	1.20387	2.3295	-0.74168	-0.122816	-0.0185348	0.718814	-0.558569	-0.295994	4.13077	-0.0906264	0.385925	0.344028
ESTS34	-0.0564683	-0.117943	-0.0672541	-0.0314415	0.104771	0.0483373	-0.190012	0.140762	0.165994	0.072834	0.126537	0.130924	-0.043792	-0.263185	-0.170433	-0.314143	-0.190949			1.08865	-0.429773	-0.532497	-4.33226	-0.538639	-4.93095	-1.7408	0.179257	-0.561225	0.73733	0.0346757	-1.33448	5.00988	-0.35242	0.843203	-0.392159
ESTS35																				#DIV/0!	#DIV/0!	#DIV/0!	#DIV/0!	#DIV/0!	#DIV/0!	#DIV/0!	#DIV/0!	#DIV/0!	#DIV/0!	#DIV/0!	#DIV/0!	#DIV/0!	#DIV/0!	#DIV/0!	#DIV/0!
FINS1	0.0714897	0.00890629	0.126633	0.0963145	0.141147	0.23355	0.21742	0.183736	0.141482	0.159696	0.120412	-0.104582	0.230752	0.31897	0.194158	0.131109	0.0039334			-0.875419	13.2184	-0.239423	0.465484	0.654657	-0.0690682	-0.154924	-0.229969	0.128737	-0.245993	-1.86853	-3.20642	0.382305	-0.391297	-0.324732	-0.969999
FINS2	-0.229081	-0.265468	-0.206143	-0.252138	-0.213089	-0.236842	-0.0940931	-0.0270012	-0.0601488	-0.0343142	-0.0602802	-0.216976	0.0834886	0.06721	0.00366629	0.0302059	-0.00900632			0.158841	-0.223474	0.223121	-0.154871	0.111468	-0.602718	-0.713037	1.22763	-0.429512	0.756715	2.59946	-1.38478	-0.194979	-0.94545	7.23882	-1.29816
FINS3	0.148594	0.145311	0.28297	0.29178	0.345356	0.361134	0.374008	0.337241	0.270664	0.268145	0.249659	-0.128849	0.386694	0.463037	0.362118	0.296811	0.288652			-0.0220904	0.947334	0.0311368	0.183615	0.0456873	0.0356497	-0.0983058	-0.197417	-0.00930575	-0.0689437	-1.5161	-4.00114	0.197426	-0.217951	-0.180345	-0.027489
FINS4	-0.0687249	-0.0802344	-0.0473037	-0.0620488	-0.0419352	-0.0399077	-0.0339662	-0.0476758	-0.0635845	-0.0508342	-0.0651224	-0.333695	-0.0339962	-0.00374037	-0.0991123	-0.125339	-0.167216			0.167473	-0.410432	0.311712	-0.324158	-0.0483469	-0.148883	0.403628	0.333683	-0.200524	0.281075	4.12412	-0.898122	-0.889977	25.498	0.264613	0.334112
FINS5	-0.060772	-0.0611193	-0.0509476	-0.0540493	-0.110914	-0.131525	-0.132144	-0.113506	-0.125838	-0.0504541	-0.0578878	-0.149612	-0.0380747	-0.0344192	-0.0774087	-0.0465975	-0.0405619			0.00571433	-0.166423	0.0608799	1.05209	0.18583	0.00470501	-0.141045	0.108651	-0.599056	0.147336	1.58451	-0.74551	-0.0960081	1.249	-0.398033	-0.129527
FINS6	0.257269	0.110453	0.286831	0.252134	0.306976	0.324277	0.359504	0.328707	0.281382	0.307764	0.284457	0.176852	0.398694	0.460524	0.392662	0.341619	0.232124			-0.570673	1.59687	-0.120966	0.217509	0.0563586	0.108634	-0.0856644	-0.143973	0.0937579	-0.0757299	-0.378281	1.25439	0.155082	-0.147358	-0.129992	-0.320518
FINS7	0.301362	0.287853	0.393735	0.221155	0.264118	0.221614	0.257806	0.29069	0.341454	0.367466	0.373015	-0.286747	0.399021	0.456155	0.439693	0.392009	0.182103			-0.0448269	0.367835	-0.438315	0.194268	-0.160927	0.16331	0.127551	0.174635	0.0761784	0.0151022	-1.76873	-2.39154	0.143185	-0.0360889	-0.108448	-0.535461
FINS8	-0.725259	-0.769346	-0.734815	-0.773596	-0.799915	-0.798224	-0.799615	-0.733164	-0.618794	-0.612012	-0.686777	-0.717886	-0.831157	-0.712894	-0.752688	-0.729796	-0.904029			0.0607889	-0.044884	0.0527773	0.0340211	-0.00211392	0.00174197	-0.0831031	-0.155996	-0.01096	0.122164	0.0452966	0.157784	-0.142287	0.055821	-0.0304133	0.238741
FINS9	-0.29246	-0.364845	-0.228124	-0.209208	-0.355443	-0.313563	-0.296816	-0.301178	-0.356606	-0.321118	-0.334868	-0.664276	-0.174257	-0.0837712	-0.106018	-0.285299	-0.441898			0.247506	-0.374738	-0.0829199	0.698996	-0.117824	-0.0534079	0.0146928	0.184038	-0.0995148	0.0428184	0.983696	-0.737674	-0.519266	0.265562	1.69105	0.548893
FINS10	-0.191067	-0.215816	-0.114079	-0.104581	-0.182396	-0.167807	-0.188014	-0.198436	-0.232527	-0.207064	-0.215084	-0.421592	-0.126422	-0.0883285	-0.106646	-0.190823	-0.283048			0.12953	-0.471407	-0.0832584	0.744063	-0.0799849	0.120417	0.0554308	0.171804	-0.109506	0.0387307	0.960125	-0.700132	-0.301319	0.207375	0.789323	0.483298
FINS11	-0.0782149	-0.174109	-0.107001	-0.091412	-0.0575446	-0.0961722	-0.00846962	-0.0293493	-0.0682464	-0.0513141	-0.0719979	-0.129653	0.0379541	0.120138	0.0053071	-0.0296339	0.0692134			1.22603	-0.385435	-0.145693	-0.370491	0.671263	-0.911933	2.46524	1.32532	-0.248106	0.403084	0.800784	-1.29274	2.16534	-0.955825	-6.58382	-3.33562
FINS12	-0.434105	-0.462608	-0.219888	-0.329215	-0.355834	-0.270331	-0.179109	-0.176988	-0.187366	-0.175339	-0.206604	-0.72718	-0.296613	-0.192277	-0.295354	-0.346476	-0.0741293			0.0656591	-0.524677	0.497194	0.0808571	-0.240291	-0.337445	-0.01184	0.0586344	-0.0641875	0.178308	2.51968	-0.592105	-0.351758	0.536086	0.173086	-0.786048
FINS13	-0.0866834	-0.121974	-0.0339131	-0.430068	-0.396663	-0.367727	-0.392197	-0.370864	-0.383754	-0.356245	-0.374632	-0.694552	-0.0331345	0.204048	0.0897145	0.0307545	0.239171			0.407122	-0.721965	11.6815	-0.0776742	-0.0729483	0.0665445	-0.0543937	0.0347557	-0.0716837	0.0516144	0.853957	-0.952294	-7.15818	-0.560326	-0.657196	6.77678
FINS14	-0.511024	-0.536882	-0.444403	-0.527777	-0.293789	-0.497821	-0.279972	-0.271327	-0.256845	-0.160483	-0.179706	-0.610647	-0.091128	0.141758	-0.0967836	0.0261442	0.379147			0.0506009	-0.172252	0.187608	-0.443345	0.694484	-0.437605	-0.0308795	-0.053374	-0.375175	0.119779	2.39804	-0.850768	-2.5556	-1.68274	-1.27013	13.5022
FINS15	-0.233169	-0.251935	-0.106313	-0.204052	-0.234546	-0.153902	-0.156257	-0.16045	-0.198072	-0.241102	-0.285668	-0.517316	-0.202924	-0.120092	-0.202123	-0.233176	-0.0971672			0.0804809	-0.578015	0.91936	0.14944	-0.343832	0.0153046	0.0268353	0.234475	0.217244	0.184843	0.810901	-0.607736	-0.408192	0.683065	0.153633	-0.583288
FINS16	-0.0450516	-0.111751	-0.0901609	-0.153105	-0.182539	-0.128971	-0.127964	-0.149492	-0.149342	-0.141281	-0.153141	-0.378501	-5.32849e-05	-0.013663	-0.0981212	-0.154515	-0.120775			1.48051	-0.193198	0.698129	0.192251	-0.293462	-0.00780708	0.168237	-0.00100407	-0.0539759	0.0839424	1.47159	-0.999859	255.414	6.18154	0.574731	-0.218361
FINS17	-0.493346	-0.557032	-0.362876	-0.508656	-0.508749	-0.531746	-0.482048	-0.167629	-0.00239756	-0.0135502	-0.175018	-0.466995	0.184343	0.260065	0.27341	0.114117	0.227571			0.129088	-0.348554	0.401735	0.000181455	0.0452034	-0.0934613	-0.652256	-0.985697	4.65168	11.9163	1.66826	-1.39474	0.410764	0.0513138	-0.582617	0.9942
FINS18	0.399495	0.351313	0.442094	0.430758	0.419862	0.445171	0.451338	0.465558	0.439956	0.482015	0.449587	-0.0226507	0.505645	0.573625	0.46763	0.420559	0.529731			-0.120607	0.258403	-0.0256423	-0.0252937	0.0602787	0.0138533	0.0315059	-0.0549909	0.0955966	-0.0672745	-1.05038	-23.3236	0.134442	-0.184781	-0.100657	0.259587
FINS19	-0.166278	-0.171137	-0.0807486	-0.0919088	-0.0196912	-0.0151654	0.0384951	0.0102463	-0.0472008	-0.0122036	-0.0494125	-0.167421	-0.0558262	0.0540716	-0.30559	-0.0972119	0.166672			0.029223	-0.528164	0.138209	-0.785753	-0.229838	-3.53835	-0.733829	-5.60662	-0.741454	3.04902	2.38823	-0.666552	-1.96857	-6.65158	-0.681888	-2.71452
FINS20	0.145749	0.0607237	0.206742	0.184749	0.259261	0.270078	0.318258	0.283697	0.231907	0.281514	0.238951	-0.06497	0.356291	0.456395	0.343475	0.205782	0.319568			-0.583368	2.40463	-0.106378	0.403318	0.0417208	0.178393	-0.108595	-0.182553	0.213909	-0.151194	-1.2719	-6.48394	0.280959	-0.247417	-0.400882	0.552944
FINS21	0.0529068	0.0317785	0.257482	0.293172	0.361848	0.315551	0.353853	0.380455	0.340816	0.368562	0.330255	0.0583041	0.389668	0.487867	0.395098	0.341168	0.400336			-0.399349	7.1024	0.138609	0.234252	-0.127944	0.12138	0.0751773	-0.104188	0.0814094	-0.103935	-0.823457	5.68337	0.252006	-0.190152	-0.136498	0.17343
FINS22	0.143712	0.162975	0.332443	0.321371	0.340789	0.323883	0.344499	0.39997	0.358351	0.384018	0.353053	0.070181	0.379658	0.39791	0.315899	0.312944	0.418612			0.13404	1.03984	-0.0333022	0.0604205	-0.0496074	0.0636515	0.16102	-0.104056	0.0716247	-0.0806328	-0.801217	4.4097	0.0480754	-0.206106	-0.00935303	0.337657
FINS23	-0.403606	-0.463106	-0.34543	-0.276061	-0.396794	-0.362613	-0.299046	-0.105659	0.188602	0.208154	0.178888	-0.0328503	-0.238417	0.157566	0.0597744	-0.23982	-0.521214			0.147421	-0.254102	-0.200819	0.437344	-0.0861416	-0.175304	-0.64668	-2.78501	0.103665	-0.140596	-1.18364	6.25767	-1.66088	-0.620638	-5.01208	1.17336
FINS24	-0.169074	-0.179357	-0.0627307	-0.0640827	-0.121887	-0.0595007	0.0553344	0.0154113	-0.0454628	-0.0123986	-0.0488282	-0.165794	0.0313212	0.124152	0.00921053	-0.0200934	-0.224873			0.0608199	-0.650247	0.0215516	0.902021	-0.511835	-1.92998	-0.721488	-3.94996	-0.727281	2.93821	2.39545	-1.18892	2.96383	-0.925812	-3.18157	10.1914
FINS25	-0.387906	-0.456532	-0.385356	-0.340271	-0.370758	-0.313892	-0.225578	0.0095977	0.132181	0.154932	0.11559	-0.0498278	-0.261453	-0.14069	-0.111162	-0.384883	-0.642547			0.176915	-0.155907	-0.116995	0.0895958	-0.153377	-0.281352	-1.04255	12.7722	0.172116	-0.25393	-1.43107	4.24714	-0.461892	-0.209882	2.46236	0.669461
FINS26	-0.199221	-0.305472	-0.24407	-0.151914	-0.185176	-0.181248	-0.125812	0.0420215	0.0833589	0.107484	0.0793183	-0.0170261	-0.072459	0.189458	0.107721	-0.0299634	-0.171091			0.533333	-0.201008	-0.377577	0.218948	-0.0212133	-0.305856	-1.334	0.983723	0.289407	-0.262042	-1.21465	3.25577	-3.61469	-0.431423	-1.27816	4.71
FINS27	-0.128274	-0.149201	-0.0504232	-0.0636013	0.0554642	0.0552631	0.106463	0.0813074	0.0129298	0.0572719	0.00990766	-0.161621	0.174664	0.28676	0.148129	0.0451197	0.176344			0.163142	-0.662045	0.26135	-1.87206	-0.00362638	0.926483	-0.236288	-0.840976	3.42943	-0.827007	-17.3127	-2.0807	0.641782	-0.483439	-0.695403	2.90837
FINS28	-0.168174	-0.180993	-0.0475794	-0.0612956	0.041356	0.0544755	0.132668	0.119327	0.0490729	0.102736	0.0395754	-0.150462	0.280103	0.379431	0.262744	0.117104	0.223744			0.0762247	-0.73712	0.288281	-1.6747	0.317232	1.43537	-0.100561	-0.588752	1.09355	-0.614787	-4.8019	-2.86162	0.354614	-0.307532	-0.554305	0.91065
FINS29	0.379286	0.328894	0.463526	0.429341	0.457619	0.409517	0.442008	0.537489	0.502897	0.531563	0.499963	0.0526196	0.49325	0.569467	0.473016	0.420744	0.484671			-0.132862	0.40935	-0.073751	0.0658644	-0.105113	0.0793388	0.216017	-0.0643588	0.0570017	-0.0594468	-0.894753	8.37389	0.154518	-0.16937	-0.110508	0.151936
FINS30	-0.194831	-0.236808	-0.0125374	-0.0241762	0.143702	0.137109	0.23515	0.196593	0.111098	0.172707	0.107375	-0.170599	0.349956	0.45546	0.337776	0.20479	0.387175			0.215452	-0.947057	0.928328	-6.94395	-0.0458818	0.715067	-0.16397	-0.434883	0.554545	-0.378279	-2.58881	-3.05134	0.301477	-0.258385	-0.39371	0.890593
FINS31	-0.0174346	0.000607128	0.221855	0.258781	0.304015	0.307602	0.367915	0.330515	0.293573	0.344947	0.286981	0.0191136	0.46532	0.546402	0.464199	0.362404	0.36068			-1.03482	364.416	0.166444	0.174795	0.0118009	0.196073	-0.101655	-0.111771	0.174995	-0.168042	-0.933398	23.3449	0.174251	-0.150444	-0.219291	-0.00475715
FINS32	0.071615	0.0551855	0.215358	0.206416	0.222454	0.206079	0.215788	0.233124	0.2009	0.232298	0.192866	-0.0597527	0.243421	0.310042	0.226032	0.162592	0.217191			-0.229415	2.90245	-0.0415234	0.0776984	-0.0736109	0.0471116	0.0803383	-0.138226	0.156285	-0.169745	-1.30981	-5.07381	0.273685	-0.270962	-0.28067	0.335805
FINS33	-0.125884	-0.132161	0.163356	0.220454	0.303542	0.32099	0.353684	0.351583	0.28665	0.322341	0.286768	-0.0610101	0.402815	0.470018	0.385882	0.298951	0.344071			0.04986	-2.23604	0.349533	0.376892	0.057482	0.101854	-0.00594012	-0.184688	0.124512	-0.110361	-1.21275	-7.60244	0.166832	-0.179005	-0.22528	0.15093
FINS34	-0.0935422	-0.111234	0.114492	0.152205	0.196553	0.215712	0.270169	0.236158	0.186979	0.230038	0.185768	-0.105269	0.313448	0.391269	0.258084	0.148817	0.303335			0.189128	-2.02929	0.329395	0.29137	0.0974765	0.252451	-0.125887	-0.208244	0.230287	-0.192446	-1.56667	-3.97759	0.248273	-0.340392	-0.423379	1.03832
FINS35																				#DIV/0!	#DIV/0!	#DIV/0!	#DIV/0!	#DIV/0!	#DIV/0!	#DIV/0!	#DIV/0!	#DIV/0!	#DIV/0!	#DIV/0!	#DIV/0!	#DIV/0!	#DIV/0!	#DIV/0!	#DIV/0!
FRAS1	0.497209	0.478131	0.461006	0.451571	0.383332	0.378131	0.384518	0.25776	0.191307	0.122733	0.0484168	0.316548	0.235009	0.41775	0.311801	0.092639	0.154742			-0.0383691	-0.0358172	-0.0204665	-0.151113	-0.0135682	0.0168897	-0.329655	-0.25781	-0.358448	-0.605511	5.53797	-0.257586	0.777587	-0.253617	-0.702891	0.670382
FRAS2	0.114452	0.0981446	0.0741727	0.0515103	0.0239818	-0.0135916	-0.0448997	-0.0931739	-0.101642	-0.116344	-0.133785	-0.0684849	-0.0875816	-0.040384	-0.0589566	-0.101103	-0.0899224			-0.142483	-0.244251	-0.305536	-0.534428	-1.56675	2.30348	1.07516	0.0908794	0.144651	0.14991	-0.488098	0.278846	-0.538899	0.4599	0.714863	-0.110582
FRAS3	0.688501	0.670638	0.654044	0.659862	0.61686	0.599514	0.597071	0.494409	0.429828	0.402394	0.360902	0.590509	0.508907	0.651958	0.575081	0.392682	0.461435			-0.0259443	-0.0247442	0.00889554	-0.0651672	-0.0281195	-0.00407552	-0.171943	-0.130623	-0.063824	-0.103114	0.636205	-0.138189	0.281095	-0.117918	-0.31717	0.175086
FRAS4	0.251604	0.223769	0.159268	0.130437	0.0408862	0.0416183	0.0316719	-0.0608191	-0.0852868	-0.115386	-0.15253	-0.0256583	-0.0538862	0.0521425	0.000904983	-0.113402	-0.0972779			-0.110631	-0.288245	-0.181023	-0.686545	0.0179067	-0.238991	-2.92028	0.402302	0.352913	0.321919	-0.831783	1.10015	-1.96764	-0.982644	-126.308	-0.142182
FRAS5	-0.215303	-0.184079	-0.22608	-0.248539	-0.263653	-0.235142	-0.240049	-0.230605	-0.245915	-0.145622	-0.175466	-0.186205	-0.264287	-0.0383973	-0.0588682	-0.0957718	-0.190513			-0.14502	0.228165	0.0993413	0.0608096	-0.108136	0.0208687	-0.0393437	0.0663917	-0.407837	0.204941	0.0612038	0.419336	-0.854714	0.533134	0.626886	0.989235
FRAS6	0.235926	0.20842	0.19196	0.176431	0.104992	0.0583689	0.0538087	-0.0434721	-0.076357	-0.0731786	-0.114651	0.0558893	0.0011565	0.12114	0.0672953	-0.0729313	-0.0372833			-0.116588	-0.0789768	-0.080893	-0.404913	-0.444063	-0.0781278	-1.8079	0.75646	-0.0416255	0.566725	-1.48747	-0.979307	103.747	-0.444482	-2.08375	-0.488788
FRAS7	0.466478	0.45146	0.428472	0.433873	0.378438	0.309476	0.231379	0.0789082	0.00631999	-0.0109567	-0.07595	0.27238	0.162757	0.362171	0.250597	-0.0355374	0.0385902			-0.0321959	-0.0509183	0.0126057	-0.127769	-0.182227	-0.252353	-0.658966	-0.919907	-2.73366	5.93184	-4.5863	-0.402463	1.22523	-0.308069	-1.14181	-2.0859
FRAS8	-0.672562	-0.701865	-0.693671	-0.707593	-0.802834	-0.793661	-0.728021	-0.706554	-0.756606	-0.710845	-0.727541	-0.673556	-0.768365	-0.560228	-0.551226	-0.578345	-0.572189			0.0435698	-0.0116756	0.02007	0.134598	-0.0114258	-0.0827043	-0.0294879	0.0708405	-0.0604827	0.0234883	-0.0742023	0.140759	-0.270883	-0.0160683	0.0491964	-0.0106431
FRAS9	0.478516	0.466474	0.410821	0.267507	-0.0209147	0.0150092	0.164499	0.186079	0.11142	0.0792144	0.0369464	0.297173	0.191587	0.382334	0.213193	-0.132412	0.00932713			-0.0251641	-0.119306	-0.348847	-1.07818	-1.71764	9.95991	0.131182	-0.401219	-0.289049	-0.53359	7.04335	-0.355301	0.995612	-0.442391	-1.62109	-1.07044
FRAS10	0.401086	0.38171	0.323569	0.214261	0.0392639	0.0438046	0.121605	0.0413764	-0.0126364	-0.0352661	-0.114988	0.149775	0.0697417	0.196388	0.0826962	-0.131646	-0.0718171			-0.0483087	-0.152318	-0.337818	-0.816748	0.115645	1.77608	-0.659748	-1.3054	1.79084	2.2606	-2.30252	-0.534357	1.81593	-0.578913	-2.59192	-0.454467
FRAS11	0.353422	0.32654	0.296248	0.299558	0.262377	0.183246	0.109651	-0.0221988	-0.075863	-0.0834464	-0.141188	0.155568	0.0677499	0.236505	0.15189	-0.136035	-0.11026			-0.0760604	-0.0927672	0.0111721	-0.12412	-0.30159	-0.401618	-1.20245	2.41743	0.0999617	0.691966	-2.10184	-0.564499	2.49086	-0.357772	-1.89561	-0.189474
FRAS12	0.345218	0.366367	0.416649	0.33857	0.260894	0.209303	0.276207	0.156394	0.0701614	0.0588083	-0.0346104	0.19356	0.180574	0.369449	0.122151	-0.238538	-0.053628			0.0612647	0.137243	-0.187398	-0.229422	-0.197749	0.319653	-0.433779	-0.551381	-0.161815	-1.58853	-6.59254	-0.0670912	1.04597	-0.66937	-2.95282	-0.775181
FRAS13	0.482287	0.503553	0.492962	0.432741	0.372467	0.368781	0.350793	0.215153	0.16435	0.125796	0.0524504	0.365883	0.280769	0.437906	0.336815	0.087475	0.137155			0.0440945	-0.0210327	-0.122161	-0.139285	-0.00989683	-0.0487761	-0.386668	-0.236125	-0.234584	-0.583052	5.97578	-0.232626	0.559667	-0.23085	-0.740288	0.567933
FRAS14	0.498267	0.472679	0.393819	0.368406	0.289746	0.268415	0.201235	0.0510663	-0.00267942	-0.0333281	-0.101278	0.181897	0.09714	0.27075	0.165841	-0.0534843	-0.014185			-0.0513543	-0.166835	-0.0645287	-0.213517	-0.073619	-0.250282	-0.746236	-1.05247	11.4386	2.03883	-2.79601	-0.465963	1.78721	-0.387476	-1.3225	-0.734782
FRAS15	0.368618	0.353918	-0.013555	-0.127969	0.0313277	-0.104028	-0.295043	-0.29434	-0.396308	-0.372417	-0.445523	-0.0551534	-0.0460623	0.135966	0.191145	0.0957857	0.159884			-0.039879	-1.0383	8.44071	-1.24481	-4.32063	1.8362	-0.00238174	0.346429	-0.0602853	0.196303	-0.876205	-0.164832	-3.95178	0.40583	-0.498885	0.669185
FRAS16	0.295697	0.277492	0.224699	0.194768	0.14978	0.0885754	0.0296727	-0.0725243	-0.0979103	-0.10654	-0.148467	0.0240348	-0.0380177	0.0903274	0.0272715	-0.109214	-0.0918814			-0.0615669	-0.190248	-0.133209	-0.230982	-0.408629	-0.665001	-3.44414	0.350035	0.0881357	0.393536	-1.16189	-2.58178	-3.37593	-0.698082	-5.00471	-0.158706
FRAS17	-0.144117	-0.223944	-0.29618	-0.336464	-0.490542	-0.562345	-0.413951	-0.32828	-0.40939	-0.25802	-0.404618	-0.184214	-0.16692	0.22147	-0.13081	-0.391027	-0.193142			0.553903	0.322562	0.136011	0.457934	0.146374	-0.263885	-0.206959	0.247076	-0.369744	0.568165	-0.544721	-0.0938811	-2.32681	-1.59064	1.98927	-0.506066
FRAS18	0.714842	0.724877	0.714191	0.716916	0.651055	0.653652	0.611583	0.50273	0.446	0.426473	0.369675	0.6133	0.547825	0.676883	0.625561	0.432592	0.508638			0.0140384	-0.0147423	0.00381566	-0.0918672	0.00398958	-0.0643605	-0.177986	-0.112842	-0.0437822	-0.133181	0.659023	-0.106759	0.235583	-0.0758205	-0.308474	0.175792
FRAS19	0.381478	0.355902	0.331523	0.366679	0.334563	0.261446	0.1779	0.0313425	-0.0283164	-0.0626364	-0.136184	0.194743	0.105471	0.283921	0.167464	-0.0705987	0.00487204			-0.0670449	-0.0685008	0.106045	-0.0875862	-0.218545	-0.319552	-0.82382	-1.90345	1.21202	1.1742	-2.43	-0.45841	1.69193	-0.410172	-1.42157	-1.06901
FRAS20	0.641181	0.611829	0.661999	0.636623	0.527572	0.543824	0.563457	0.445286	0.410223	0.411313	0.338402	0.607151	0.519701	0.664564	0.587062	0.383321	0.457163			-0.0457774	0.0819994	-0.0383317	-0.171297	0.030805	0.036102	-0.209724	-0.0787426	0.00265504	-0.177263	0.794171	-0.144033	0.278741	-0.11662	-0.347052	0.192638
FRAS21	0.559542	0.542164	0.554063	0.571088	0.49821	0.475818	0.406965	0.26081	0.200571	0.190265	0.156255	0.465924	0.374871	0.554407	0.457716	0.214092	0.303851			-0.0310576	0.0219472	0.0307273	-0.127613	-0.0449445	-0.144704	-0.359133	-0.230972	-0.0513798	-0.178752	1.98182	-0.195424	0.478927	-0.174405	-0.532261	0.419258
FRAS22	0.593983	0.568716	0.561889	0.571637	0.512245	0.497664	0.491208	0.378319	0.327646	0.301712	0.259209	0.487571	0.417382	0.518857	0.470758	0.334974	0.415758			-0.0425386	-0.0120042	0.0173477	-0.103898	-0.0284644	-0.0129723	-0.229819	-0.133942	-0.0791539	-0.140873	0.880996	-0.143956	0.243122	-0.0927008	-0.288436	0.241162
FRAS23	0.275843	0.224986	0.327414	0.169792	-0.113167	-0.112327	0.0375466	0.154043	0.079924	0.0575435	0.0199786	0.340849	0.260921	0.408342	0.36901	0.174201	0.245121			-0.184371	0.455268	-0.481414	-1.6665	-0.00742151	-1.33426	3.10272	-0.481158	-0.280023	-0.652808	16.0607	-0.234498	0.565003	-0.0963209	-0.527923	0.407114
FRAS24	0.297851	0.299033	0.310714	0.306726	0.278738	0.212811	0.162841	0.0253741	-0.0238473	-0.0401554	-0.0931861	0.261359	0.15958	0.353813	0.283382	0.0416574	0.131426			0.00396742	0.0390633	-0.0128375	-0.0912474	-0.236518	-0.234811	-0.844178	-1.93983	0.683853	1.32064	-3.8047	-0.389421	1.21715	-0.199063	-0.852999	2.15492
FRAS25	0.288726	0.274522	0.238299	-0.180107	-0.381984	-0.399935	-0.317921	-0.224846	-0.15401	-0.100011	-0.13676	-0.0238633	-0.0786891	0.00944455	0.0410176	-0.134974	-0.151178			-0.0491949	-0.131948	-1.7558	1.12088	0.0469948	-0.205068	-0.292761	-0.315042	-0.350621	0.367452	-0.82551	2.29749	-1.12002	3.34299	-4.29063	0.120057
FRAS26	0.416938	0.399659	0.389163	0.413437	0.365672	0.307749	0.237258	0.079739	0.0287237	0.0670103	0.0301517	0.418938	0.320913	0.486614	0.43134	0.208403	0.301116			-0.0414425	-0.0262646	0.0623763	-0.115533	-0.158402	-0.229053	-0.663914	-0.639778	1.33293	-0.550044	12.8944	-0.233985	0.516343	-0.11359	-0.516847	0.444871
FRAS27	0.475187	0.464371	0.459806	0.478024	0.429473	0.370373	0.288235	0.130174	0.0523686	0.0150318	-0.0736794	0.273219	0.169528	0.389647	0.294359	0.0381649	0.133137			-0.0227633	-0.00982854	0.0396201	-0.101566	-0.13761	-0.221773	-0.548376	-0.597702	-0.712962	-5.90158	-4.70821	-0.379514	1.29842	-0.244548	-0.870346	2.48847
FRAS28	0.651547	0.640032	0.629864	0.635362	0.593429	0.549148	0.487588	0.355366	0.301069	0.281956	0.229628	0.514435	0.439175	0.612215	0.519478	0.295074	0.379027			-0.0176741	-0.015886	0.00872819	-0.0659991	-0.0746178	-0.112102	-0.271176	-0.152792	-0.0634846	-0.185589	1.2403	-0.146297	0.394012	-0.151478	-0.431979	0.284515
FRAS29	0.564067	0.52913	0.582158	0.62571	0.565105	0.532434	0.485796	0.36933	0.293287	0.270969	0.173955	0.465672	0.379622	0.554088	0.464345	0.220171	0.163037			-0.0619376	0.100219	0.0748102	-0.0968582	-0.0578135	-0.0875947	-0.239743	-0.205894	-0.0760967	-0.358026	1.67697	-0.184786	0.459578	-0.161966	-0.525845	-0.259501
FRAS30	0.636751	0.618171	0.622761	0.651388	0.61419	0.575772	0.515473	0.373473	0.31334	0.306859	0.23879	0.551249	0.468521	0.639489	0.557668	0.338414	0.423095			-0.0291793	0.00742458	0.0459683	-0.0571058	-0.0625505	-0.104727	-0.275476	-0.16101	-0.0206845	-0.221825	1.30852	-0.150075	0.364909	-0.127947	-0.393163	0.250231
FRAS31	0.587835	0.573459	0.571443	0.580708	0.540455	0.490972	0.428328	0.27697	0.220158	0.22353	0.138137	0.428976	0.357489	0.547156	0.406766	0.113356	0.227574			-0.0244565	-0.00351611	0.0162146	-0.0693174	-0.0915593	-0.127592	-0.353368	-0.205123	0.0153202	-0.382021	2.10544	-0.166645	0.530554	-0.256582	-0.721325	1.00761
FRAS32	0.422667	0.403433	0.407234	0.424596	0.37415	0.312811	0.241903	0.0913517	0.031295	0.00968152	-0.0676453	0.253219	0.155753	0.340836	0.243069	-0.00279642	0.0811045			-0.0455068	0.00942202	0.0426325	-0.11881	-0.163941	-0.226681	-0.622362	-0.657423	-0.690637	-7.98705	-4.74333	-0.384908	1.18831	-0.286846	-1.0115	-30.003
FRAS33	0.511368	0.490259	0.492852	0.507125	0.448397	0.402304	0.340964	0.191485	0.142916	0.126527	0.0415827	0.377029	0.29063	0.503348	0.401343	0.125117	0.225502			-0.0412797	0.00528797	0.02896	-0.115806	-0.102794	-0.152472	-0.438401	-0.253645	-0.114673	-0.671353	8.06696	-0.229158	0.731922	-0.202653	-0.688254	0.802328
FRAS34	0.473748	0.44166	0.426987	0.453291	0.388323	0.355489	0.403408	0.255283	0.175974	0.17662	0.0535875	0.436549	0.348898	0.522409	0.426719	0.192888	0.280162			-0.0677317	-0.0332223	0.0616035	-0.143325	-0.0845543	0.134798	-0.367185	-0.31067	0.0036687	-0.696594	7.14646	-0.200781	0.497311	-0.18317	-0.547973	0.452456
FRAS35																				#DIV/0!	#DIV/0!	#DIV/0!	#DIV/0!	#DIV/0!	#DIV/0!	#DIV/0!	#DIV/0!	#DIV/0!	#DIV/0!	#DIV/0!	#DIV/0!	#DIV/0!	#DIV/0!	#DIV/0!	#DIV/0!
UKGS1	0.273889	0.28879	0.29477	0.239422	0.0881932	0.0269403	0.0721391	0.256898	0.141581	0.14823	0.139307	0.0162514	-0.0550858	0.133669	0.215992	-0.0898374	-0.0208849			0.0544046	0.0207056	-0.187768	-0.631641	-0.694531	1.67774	2.56115	-0.448884	0.0469624	-0.0601948	-0.883341	-4.3896	-3.42655	0.615877	-1.41593	-0.767526
UKGS2	0.269753	0.242269	0.240331	0.306948	0.134017	-0.0529366	0.128463	0.237383	0.209971	0.16005	0.0654233	-0.131988	-0.197292	0.00260361	0.144441	-0.0348036	-0.0772073			-0.101888	-0.00800004	0.27719	-0.563388	-1.395	-3.42673	0.847872	-0.115475	-0.237752	-0.591232	-3.01745	0.49477	-1.0132	54.4773	-1.24095	1.21838
UKGS3	0.616082	0.600889	0.483043	0.414602	0.23687	0.147876	0.206117	0.424395	0.311691	0.321165	0.334511	0.16954	0.0449156	0.290975	0.37118	-0.0265145	0.102202			-0.024661	-0.196119	-0.141687	-0.428682	-0.375709	0.393851	1.059	-0.265564	0.0303971	0.0415547	-0.493171	-0.735074	5.47826	0.275644	-1.07143	-4.85457
UKGS4	0.243997	0.204347	0.116618	0.142217	0.045963	0.0433507	0.0339868	0.0512645	0.0321879	0.00491495	-0.0548684	-0.11314	-0.117553	-0.0516734	-0.00828972	-0.0783988	-0.0736272			-0.162504	-0.429312	0.219508	-0.67681	-0.056836	-0.216003	0.508365	-0.372121	-0.847304	-12.1636	1.06202	0.0390026	-0.560423	-0.839575	8.45735	-0.0608628
UKGS5	-0.0122305	-0.0229348	-0.0298101	-0.0283775	-0.158536	-0.0454499	-0.0405269	-0.0177727	-0.0411704	-0.0368519	-0.0433813	-0.054394	-0.055235	-0.0410771	-0.0291939	-0.0659962	-0.0689088			0.875218	0.299772	-0.0480572	4.58668	-0.713314	-0.108318	-0.56146	1.3165	-0.104895	0.17718	0.253859	0.0154611	-0.256322	-0.289289	1.26062	0.0441323
UKGS6	0.0154867	-6.29106e-06	0.00496815	0.0495276	-0.000717027	-0.00504297	0.00297342	0.0108625	-0.00359153	-0.0210832	-0.0547354	-0.0671542	-0.0843094	-0.147154	-0.0124517	-0.067528	-0.08203			-1.00041	-790.716	8.96901	-1.01448	6.03317	-1.58962	2.6532	-1.33064	4.87027	1.59616	0.226889	0.25546	0.745398	-0.915383	4.42319	0.214754
UKGS7	0.444996	0.42067	0.360653	0.337842	0.175722	0.0876764	0.124954	0.287723	0.199333	0.222807	0.127185	-0.0913592	-0.168622	0.035426	0.158144	-0.0349937	-0.0555424			-0.0546656	-0.142672	-0.063247	-0.47987	-0.501051	0.425167	1.30264	-0.307205	0.117762	-0.42917	-1.71832	0.845705	-1.21009	3.46407	-1.22128	0.587213
UKGS8	0.352471	0.218569	0.0605534	-0.0649443	-0.448049	-0.525552	-0.435442	-0.0534465	0.0544786	0.217526	0.136152	-0.33352	-0.173625	0.0183087	0.156082	-0.26017	-0.439233			-0.379896	-0.722955	-2.07251	5.89898	0.172978	-0.171457	-0.877259	-2.01931	2.99287	-0.374089	-3.44962	-0.479417	-1.10545	7.52502	-2.66688	0.688255
UKGS9	0.490764	0.451593	0.33277	0.289919	0.173468	0.0823751	0.107198	0.253918	0.195905	0.145035	0.122621	-0.0572504	-0.143768	0.103666	-0.0405787	-0.0979518	-0.00694673			-0.0798153	-0.263121	-0.128769	-0.401669	-0.525127	0.301337	1.36869	-0.22847	-0.259668	-0.154544	-1.46689	1.51121	-1.72106	-1.39144	1.41387	-0.92908
UKGS10	0.324211	0.291083	0.198365	0.168145	0.0336292	-0.0856236	0.0540009	0.19844	0.117237	0.115702	0.063737	-0.0587421	-0.0976206	0.0100181	-0.0476704	-0.107918	-0.115101			-0.102181	-0.318529	-0.152344	-0.799999	-3.54611	-1.63068	2.67475	-0.409207	-0.0130962	-0.449127	-1.92163	0.661851	-1.10262	-5.75842	1.26383	0.0665654
UKGS11	0.0945439	-0.0610537	-0.186811	-0.180062	-0.304997	-0.320989	-0.30136	-0.177304	-0.267728	-0.257965	-0.273125	-0.25589	-0.203472	-0.240311	-0.00586786	-0.380053	-0.333732			-1.64577	2.05978	-0.0361282	0.693846	0.0524336	-0.0611506	-0.411656	0.509995	-0.0364649	0.0587665	-0.0631032	-0.204843	0.181051	-0.975582	63.7685	-0.121881
UKGS12	0.530892	0.478435	0.328119	0.176806	0.0288083	-0.0599514	-0.0509815	0.198202	0.0685885	0.099267	0.10931	-0.0607296	-0.0736142	0.106314	0.215347	-0.255799	-0.233171			-0.0988089	-0.314184	-0.461152	-0.837063	-3.08105	-0.149619	-4.88773	-0.653947	0.447284	0.101169	-1.55557	0.212164	-2.4442	1.02558	-2.18784	-0.0884601
UKGS13	0.472875	0.440191	0.385334	0.348818	0.312492	0.270115	0.244437	0.354245	0.377605	0.334558	0.283972	-0.0593487	-0.133216	0.10129	0.227289	0.0141312	-0.0136683			-0.0691183	-0.12462	-0.0947639	-0.104142	-0.13561	-0.0950621	0.449226	0.0659442	-0.114001	-0.151201	-1.20899	1.24463	-1.76034	1.24395	-0.937827	-1.96724
UKGS14	0.460464	0.422554	0.353746	-0.112187	-0.104895	-0.173867	-0.304844	-0.20101	-0.234602	-0.242589	-0.16611	-0.121844	-0.15858	0.0220171	0.123446	-0.0470569	-0.0657431			-0.0823313	-0.162837	-1.31714	-0.0649987	0.657523	0.753322	-0.340613	0.167113	0.0340474	-0.31526	-0.26649	0.301507	-1.13884	4.60684	-1.38119	0.397099
UKGS15	0.458109	0.541457	0.356648	0.15166	-0.34481	0.0798806	-0.0487288	-0.350648	-0.428437	-0.443942	-0.455235	-0.523168	-0.479528	-0.442692	-0.158919	-0.533392	0.07638			0.181939	-0.341317	-0.574763	-3.27357	-1.23167	-1.61002	6.19591	0.221842	0.0361903	0.0254361	0.149227	-0.0834155	-0.0768165	-0.641018	2.35638	-1.1432
UKGS16	0.246198	0.214242	0.142044	0.190857	0.088032	0.0552147	0.0607556	0.0857178	0.00957834	-0.0114385	-0.0591445	-0.12364	-0.144898	-0.0381653	0.0665027	-0.069888	-0.0863201			-0.129799	-0.336991	0.343648	-0.538755	-0.372788	0.100352	0.410862	-0.888257	-2.1942	4.17065	1.09048	0.171929	-0.736605	-2.74249	-2.05091	0.235121
UKGS17	0.308396	0.0855333	-0.164118	-0.190587	-0.47312	-0.562988	-0.467052	-0.207113	-0.35691	-0.333496	-0.369387	-0.414094	-0.292832	-0.370779	0.1075	-0.738615	-0.556739			-0.722651	-2.91877	0.161279	1.48243	0.189949	-0.170405	-0.556554	0.723267	-0.0656041	0.107621	0.121031	-0.292836	0.26618	-1.28993	-7.87086	-0.24624
UKGS18	0.698357	0.688306	0.656243	0.647968	0.583297	0.538241	0.563963	0.617929	0.625217	0.594758	0.538749	0.282718	0.155925	0.456759	0.566434	0.401564	0.374136			-0.014392	-0.0465824	-0.012609	-0.099806	-0.0772449	0.0477893	0.0956905	0.0117954	-0.0487187	-0.0941702	-0.475233	-0.448478	1.92935	0.240115	-0.291066	-0.0683041
UKGS19	0.414582	0.398695	0.387636	0.397791	0.317647	0.257004	0.284894	0.364363	0.354048	0.308217	0.187595	-0.0900881	-0.177486	0.103904	0.267102	0.0382319	0.0165359			-0.0383201	-0.0277377	0.0261962	-0.201471	-0.190914	0.108521	0.278942	-0.0283111	-0.129447	-0.391355	-1.48023	0.970143	-1.58542	1.57067	-0.856864	-0.567483
UKGS20	0.641716	0.627371	0.597335	0.614975	0.553513	0.504535	0.526373	0.570132	0.570065	0.541006	0.478519	0.262501	0.124734	0.401357	0.504396	0.324057	0.288709			-0.0223549	-0.0478761	0.0295318	-0.0999421	-0.0884864	0.0432838	0.0831344	-0.000117866	-0.0509753	-0.115501	-0.45143	-0.524824	2.21769	0.256726	-0.357535	-0.109079
UKGS21	0.672184	0.663414	0.669309	0.664921	0.607557	0.561689	0.579518	0.623527	0.637314	0.607237	0.553578	0.278654	0.161289	0.442966	0.544025	0.366904	0.335858			-0.013047	0.00888608	-0.00655578	-0.0862722	-0.0754959	0.0317414	0.0759409	0.022112	-0.0471945	-0.0883652	-0.496632	-0.421183	1.74641	0.228142	-0.325576	-0.0846149
UKGS22	0.63193	0.618313	0.589513	0.56329	0.433835	0.36855	0.407942	0.564093	0.481277	0.498204	0.447604	0.227082	0.105166	0.304045	0.43596	0.290259	0.295375			-0.021549	-0.0465774	-0.0444838	-0.229819	-0.150484	0.106884	0.382779	-0.146812	0.0351703	-0.101565	-0.492672	-0.536883	1.89111	0.433866	-0.334207	0.017625
UKGS23	0.510597	0.498221	0.470427	0.481221	0.400911	0.337833	0.373946	0.447794	0.427373	0.373954	0.27328	0.0155876	-0.108747	0.206633	0.339487	0.069765	0.0371407			-0.0242393	-0.0557861	0.0229445	-0.166887	-0.157337	0.106895	0.197485	-0.0456035	-0.124994	-0.269214	-0.942961	-7.97652	-2.90012	0.642946	-0.794499	-0.467631
UKGS24	0.293086	0.303281	0.275786	0.322233	0.225468	0.164321	0.193956	0.256301	0.243321	0.184403	0.0993989	-0.102516	-0.153632	0.00363708	0.0956441	-0.0332857	-0.0576365			0.0347834	-0.090658	0.168416	-0.300294	-0.2712	0.180344	0.321439	-0.0506411	-0.242141	-0.46097	-2.03136	0.498618	-1.02367	25.297	-1.34802	0.731572
UKGS25	0.336992	0.314425	0.288179	0.315076	0.206262	0.150773	0.186736	0.259653	0.220246	0.178608	0.117809	-0.0958335	-0.186394	-0.0500555	0.0547009	-0.0552869	-0.0224519			-0.0669672	-0.0834713	0.0933321	-0.345357	-0.269022	0.238525	0.390478	-0.151766	-0.18905	-0.340409	-1.81347	0.944973	-0.731453	-2.09281	-2.01071	-0.593902
UKGS26	0.416655	0.395193	0.373823	0.391441	0.294528	0.229927	0.265183	0.344651	0.328185	0.271672	0.168969	-0.047924	-0.180799	0.083888	0.24579	0.0349968	0.00294412			-0.0515089	-0.0540761	0.0471299	-0.247579	-0.219337	0.153335	0.299672	-0.047776	-0.172198	-0.378041	-1.28363	2.77262	-1.46399	1.92997	-0.857615	-0.915875
UKGS27	0.421601	0.403178	0.395175	0.420677	0.344641	0.282333	0.320228	0.388105	0.362745	0.306557	0.188801	-0.105055	-0.187861	0.0978966	0.294785	0.0625173	0.0275349			-0.0436978	-0.0198482	0.064533	-0.180748	-0.180791	0.134222	0.211963	-0.0653412	-0.154898	-0.384125	-1.55643	0.788224	-1.52111	2.01119	-0.787923	-0.559564
UKGS28	0.684703	0.703507	0.698716	0.702519	0.665834	0.622058	0.635586	0.673864	0.668215	0.628924	0.545241	0.388373	0.287475	0.519689	0.59525	0.434141	0.416559			0.0274624	-0.00681019	0.00544335	-0.0522193	-0.0657467	0.0217484	0.0602246	-0.00838332	-0.0588001	-0.133058	-0.287703	-0.259797	0.807773	0.145395	-0.270658	-0.0404977
UKGS29	0.707304	0.691634	0.762451	0.767928	0.720978	0.67256	0.693921	0.724716	0.716667	0.690059	0.633375	0.455172	0.362161	0.59766	0.651187	0.529614	0.495794			-0.0221546	0.102391	0.00718273	-0.0611388	-0.0671549	0.0317601	0.0443791	-0.0111071	-0.0371268	-0.0821448	-0.281355	-0.204342	0.650261	0.0895612	-0.186694	-0.063858
UKGS30	0.562072	0.546615	0.543853	0.546028	0.470163	0.398842	0.429215	0.486316	0.486004	0.430946	0.303482	-0.0295223	-0.140149	0.27661	0.455367	0.225475	0.189351			-0.0275008	-0.00505126	0.00399805	-0.138939	-0.151696	0.0761539	0.133035	-0.000640783	-0.113287	-0.295777	-1.09728	3.74723	-2.97368	0.646241	-0.50485	-0.160214
UKGS31	0.528469	0.501581	0.535868	0.554136	0.508188	0.447682	0.463928	0.525532	0.501482	0.456159	0.353468	0.175668	0.0519798	0.319747	0.42034	0.215902	0.212555			-0.0508783	0.0683569	0.0340908	-0.0829185	-0.119061	0.0362875	0.132789	-0.0457631	-0.0903789	-0.22512	-0.503015	-0.704103	5.15137	0.314603	-0.486364	-0.0154994
UKGS32	0.436109	0.428684	0.414175	0.42382	0.33076	0.261323	0.288834	0.360858	0.351795	0.289791	0.176295	-0.0513382	-0.153214	0.119145	0.252209	0.030296	0.00256544			-0.0170263	-0.0338439	0.0232863	-0.219574	-0.209931	0.105275	0.249361	-0.0251129	-0.17625	-0.39165	-1.29121	1.98441	-1.77764	1.11682	-0.879877	-0.915321
UKGS33	0.46879	0.469005	0.31956	0.318327	0.274386	0.163735	0.183615	0.352646	0.403532	0.236202	0.25461	0.0855891	-0.0345683	0.310462	0.0559189	0.0840397	0.191496			0.000457337	-0.318642	-0.00385845	-0.138038	-0.403267	0.121412	0.920576	0.144299	-0.414665	0.0779356	-0.663842	-1.40389	-9.98113	-0.819885	0.502885	1.27864
UKGS34	0.452548	0.527283	0.326022	0.546552	0.479986	0.419047	0.448482	0.509612	0.555323	0.513342	0.44951	0.101341	-0.0391093	0.303392	0.452928	0.251991	0.223844			0.165143	-0.381694	0.676425	-0.121792	-0.12696	0.0702434	0.136303	0.0896983	-0.0755975	-0.124345	-0.774553	-1.38592	-8.75753	0.492882	-0.44364	-0.111699
UKGS35																				#DIV/0!	#DIV/0!	#DIV/0!	#DIV/0!	#DIV/0!	#DIV/0!	#DIV/0!	#DIV/0!	#DIV/0!	#DIV/0!	#DIV/0!	#DIV/0!	#DIV/0!	#DIV/0!	#DIV/0!	#DIV/0!
GRCS1	-0.15469	-0.317491	-0.161363	-0.457988	-0.0977414	-0.203688	-0.163624	0.0967361	-0.63501	-0.509674	-0.325893	-0.375367	-0.510982	-0.456777	-0.530946	-0.658582	-0.609971			1.05243	-0.491755	1.83824	-0.786585	1.08394	-0.196692	-1.59121	-7.56436	-0.197377	-0.360586	0.15181	0.361289	-0.106081	0.162376	0.240392	-0.0738114
GRCS2	0.0161111	-0.0403611	0.0103817	0.0177837	-0.0103243	-0.00054208	0.0637683	0.0611176	-0.0543676	-0.0189585	-0.0452213	-0.0517848	-0.0772631	-0.171087	-0.159754	-0.244904	-0.198398			-3.50517	-1.25722	0.712981	-1.58055	-0.947494	-118.636	-0.0415686	-1.88956	-0.65129	1.38528	0.145141	0.492003	1.21435	-0.0662407	0.533006	-0.189896
GRCS3	0.270031	0.183572	0.337064	0.370665	0.409104	0.404649	0.446493	0.429943	-0.10093	0.198551	0.322054	0.25125	-0.0795769	0.414599	-0.0210482	0.105059	0.192171			-0.32018	0.836137	0.0996888	0.103703	-0.0108902	0.103408	-0.0370673	-1.23475	-2.96722	0.622021	-0.219851	-1.31672	-6.21004	-1.05077	-5.99135	0.829174
GRCS4	-0.16158	-0.232236	-0.152465	-0.16676	-0.181225	-0.196974	-0.159586	-0.197933	-0.273636	-0.0443161	-0.215827	-0.28567	-0.405121	-0.197382	-0.38517	-0.257754	-0.272039			0.437279	-0.343491	0.0937603	0.086743	0.0869041	-0.189811	0.240289	0.382463	-0.838047	3.87017	0.323606	0.418145	-0.512784	0.951397	-0.330804	0.0554191
GRCS5	-0.218707	-0.235145	-0.180267	-0.196424	-0.216436	-0.218278	-0.179977	-0.197106	-0.198262	-0.115351	-0.157823	-0.236902	-0.24119	-0.206729	-0.227598	-0.195376	-0.186531			0.0751582	-0.233378	0.0896288	0.101881	0.00851041	-0.175469	0.0951722	0.00586456	-0.41819	0.368197	0.501064	0.0181021	-0.142881	0.100948	-0.141573	-0.0452722
GRCS6	-0.215858	-0.254185	-0.193561	-0.218103	-0.220218	-0.22371	-0.192339	-0.218599	-0.218689	-0.11337	-0.192194	-0.270604	-0.325783	-0.240578	-0.323988	-0.257947	-0.198905			0.177556	-0.238502	0.126791	0.00969702	0.0158575	-0.140231	0.13653	0.00041272	-0.481592	0.69528	0.407972	0.203908	-0.261538	0.346704	-0.203836	-0.228893
GRCS7	-0.15034	-0.223699	-0.152869	-0.117422	-0.128456	-0.171568	-0.12171	-0.16461	-0.161592	0.282006	0.0274399	-0.276146	-0.413784	-0.129884	-0.386279	-0.21178	-0.0589842			0.487951	-0.31663	-0.231877	0.0939607	0.335622	-0.2906	0.352476	-0.0183386	-2.74518	-0.902698	-11.0637	0.498422	-0.686106	1.97402	-0.451745	-0.721483
GRCS8	-0.816138	-0.694642	-0.806336	-0.848384	-0.891669	-0.861023	-0.90011	-0.908456	-0.939968	-0.867894	-0.892977	-0.879802	-0.905528	-0.896445	-0.919615	-0.947819	-0.944462			-0.148867	0.160792	0.0521474	0.0510209	-0.0343694	0.0453957	0.00927247	0.0346878	-0.0766769	0.0289009	-0.014754	0.0292403	-0.0100309	0.0258467	0.0306691	-0.0035414
GRCS9	-0.121932	-0.182242	-0.116077	-0.129383	-0.119225	-0.157715	-0.0925752	-0.134798	-0.261195	0.0706033	-0.1812	-0.261725	-0.415704	-0.214094	-0.37686	-0.179849	-0.0350107			0.494616	-0.363059	0.114628	-0.0785149	0.322836	-0.413021	0.456088	0.93768	-1.27031	-3.56646	0.444396	0.588326	-0.484986	0.76026	-0.522769	-0.805333
GRCS10	-0.206799	-0.244489	-0.18402	-0.17285	-0.164131	-0.15765	-0.1122	-0.14599	-0.272521	-0.00922944	-0.212613	-0.295088	-0.381232	-0.538823	-0.369026	-0.265599	-0.361577			0.182254	-0.247327	-0.0607027	-0.050444	-0.0394831	-0.288297	0.301156	0.866713	-0.966133	22.0364	0.387911	0.291927	0.413372	-0.315126	-0.280269	0.361361
GRCS11	-0.171838	-0.226866	-0.160418	-0.130495	-0.184012	-0.213618	-0.175493	-0.197257	-0.275018	0.0437205	-0.196413	-0.284622	-0.403543	-0.15508	-0.387311	-0.228644	-0.121393			0.320234	-0.292894	-0.186529	0.410101	0.160893	-0.178472	0.124013	0.394215	-1.15897	-5.49246	0.449103	0.417819	-0.615705	1.4975	-0.409662	-0.469074
GRCS12	-0.0589992	-0.133268	-0.0433736	-0.00298553	0.0134995	-0.0593017	-0.0230174	-0.0586394	-0.227387	-0.102267	-0.191606	-0.276422	-0.38486	-0.468231	-0.43881	-0.46346	-0.403579			1.25881	-0.674539	-0.931167	-5.52163	-5.39289	-0.61186	1.54761	2.87771	-0.550249	0.87358	0.442657	0.392291	0.216626	-0.0628327	0.0561733	-0.129204
GRCS13	-0.222355	-0.254311	-0.207589	-0.21828	-0.221785	-0.229785	-0.190915	-0.215339	-0.266708	-0.00602652	-0.212084	-0.294085	-0.381031	-0.230305	-0.369201	-0.265874	-0.18184			0.143712	-0.183717	0.0514969	0.0160603	0.036069	-0.169158	0.127935	0.238545	-0.977404	34.1919	0.386643	0.295646	-0.395573	0.603096	-0.279866	-0.31607
GRCS14	-0.218294	-0.255272	-0.208634	-0.2061	-0.212885	-0.199781	-0.170962	-0.201927	-0.273159	-0.0161999	-0.213215	-0.294308	-0.4036	-0.198736	-0.387239	-0.364845	-0.333233			0.169396	-0.182701	-0.0121434	0.0329179	-0.0615533	-0.14425	0.181119	0.35276	-0.940694	12.1615	0.380335	0.371352	-0.507592	0.948511	-0.0578313	-0.0866453
GRCS15	-0.220984	-0.244923	-0.20793	-0.218635	-0.216544	-0.208493	-0.175863	-0.194185	-0.219865	-0.0960466	-0.210039	-0.266952	-0.32812	-0.240556	-0.325844	-0.253408	-0.201577			0.108326	-0.151037	0.0514825	-0.00956471	-0.0371799	-0.156502	0.10418	0.132246	-0.563156	1.18684	0.270968	0.229134	-0.266867	0.354546	-0.222303	-0.204534
GRCS16	-0.218844	-0.253968	-0.19003	-0.195394	-0.206299	-0.223985	-0.187435	-0.213547	-0.274605	0.156325	-0.139151	-0.294146	-0.372791	-0.227934	-0.368996	-0.265152	-0.170914			0.160495	-0.251755	0.0282288	0.0558099	0.0857259	-0.163178	0.13931	0.285925	-1.56927	-1.89014	1.11386	0.267369	-0.388575	0.618874	-0.281424	-0.355412
GRCS17	-0.188026	-0.237207	-0.166889	-0.150087	-0.226929	-0.168657	-0.325698	-0.161013	-0.251883	-0.592263	-0.696456	-0.652408	-0.719574	-0.74712	-0.817888	-0.880458	-0.865009			0.261564	-0.296442	-0.100677	0.511984	-0.256788	0.931127	-0.505636	0.564359	1.35134	0.175924	-0.0632454	0.102951	0.0382798	0.0947213	0.0765023	-0.0175465
GRCS18	0.577478	0.524089	0.556609	0.424983	0.397775	0.388266	0.405752	0.342475	0.373085	0.409094	0.365646	0.0878733	0.0379265	-0.157515	-0.149304	-0.159201	-0.014018			-0.0924517	0.0620513	-0.236479	-0.0640218	-0.0239046	0.0450375	-0.15595	0.0893772	0.0965179	-0.106205	-0.759677	-0.568395	-5.15316	-0.0521258	0.0662871	-0.911948
GRCS19	0.0650402	0.0215555	0.110093	0.0619597	0.0559352	0.0965651	0.138712	0.114926	0.093155	0.0460295	0.0218675	0.075747	-0.202724	-0.142589	-0.130705	-0.123755	-0.0328168			-0.668582	4.10744	-0.437208	-0.0972324	0.726374	0.436461	-0.171474	-0.189438	-0.505882	-0.524924	2.4639	-3.67633	-0.296636	-0.0833415	-0.0531735	-0.734825
GRCS20	-0.0479645	-0.155176	0.014699	0.0561825	0.0665523	0.0509409	0.0785901	0.0148728	-0.165325	0.378982	0.0366025	-0.101842	-0.423082	0.148117	-0.330532	0.0301771	0.259517			2.23522	-1.09472	2.82219	0.184573	-0.234572	0.542769	-0.810755	-12.1159	-3.29234	-0.903419	-3.78237	3.1543	-1.35009	-3.23157	-1.0913	7.59978
GRCS21	0.263864	0.183934	0.289613	0.266421	0.254984	0.332916	0.260661	0.137265	0.160303	0.217679	-0.0583838	-0.0878046	-0.383157	0.133039	-0.228949	0.0776765	0.173779			-0.30292	0.574548	-0.080079	-0.0429292	0.305637	-0.217038	-0.473395	0.167831	0.357925	-1.26821	0.503921	3.36375	-1.34722	-2.72092	-1.33927	1.23722
GRCS22	0.337526	0.22796	0.305061	0.318368	0.340431	0.374436	0.45861	0.39641	0.148493	0.314892	0.411788	0.27054	0.0632512	0.13079	-0.112162	-0.0314551	0.100797			-0.324615	0.338218	0.0436219	0.0692995	0.0998877	0.224803	-0.135626	-0.625405	1.12058	0.307712	-0.343012	-0.766204	1.06778	-1.85757	-0.719556	-4.20447
GRCS23	0.210238	0.206027	0.266303	0.210412	0.183696	0.202272	0.266987	0.267629	0.118348	0.218907	0.172428	0.0389147	-0.221229	-0.0875625	-0.023185	-0.275845	-0.0724936			-0.0200299	0.292563	-0.209878	-0.126972	0.101125	0.31994	0.00240685	-0.557792	0.849691	-0.212325	-0.774313	-6.68496	-0.604199	-0.735218	10.8976	-0.737195
GRCS24	0.0179072	-0.209566	-0.0625526	-0.400379	0.0074251	-0.00823522	0.0717137	0.0937492	-0.538104	-0.313185	-0.537324	-0.764955	-0.787695	-0.786598	-0.845006	-0.868258	-0.822006			-12.7029	-0.701514	5.40068	-1.01855	-2.10911	-9.70818	0.30727	-6.73982	-0.417984	0.715678	0.423638	0.0297268	-0.00139226	0.074254	0.0275164	-0.0532688
GRCS25	-0.102092	-0.121779	-0.0819386	-0.126007	-0.112521	-0.0650982	0.0163362	-0.00295467	-0.0765985	0.0273218	-0.00332198	0.0131763	-0.0937356	-0.2137	-0.197812	-0.156542	-0.0900853			0.192838	-0.327156	0.537819	-0.10702	-0.421459	-1.25095	-1.18087	24.9246	-1.35669	-1.12159	-4.9664	-8.11396	1.27982	-0.074347	-0.208636	-0.424528
GRCS26	0.0468257	-0.0476077	0.0662563	0.115963	0.0945589	0.149281	0.198501	0.173162	0.171211	0.258489	0.234582	0.351757	0.237605	0.00254561	0.0809797	0.195766	0.28222			-2.0167	-2.39171	0.750217	-0.184576	0.578715	0.329708	-0.127652	-0.0112681	0.509772	-0.0924879	0.499508	-0.32452	-0.989286	30.8115	1.41746	0.441625
GRCS27	0.225212	0.145465	0.232165	0.248647	0.274813	0.290585	0.323852	0.277759	0.270106	0.423078	0.39476	0.268637	0.198032	0.0938488	0.124068	0.104511	0.187471			-0.354096	0.596014	0.0709959	0.105233	0.0573913	0.114484	-0.142329	-0.0275527	0.566344	-0.0669347	-0.319493	-0.262824	-0.526094	0.321997	-0.157634	0.793797
GRCS28	0.214227	0.158232	0.241999	0.261397	0.294628	0.2978	0.346135	0.308152	0.233117	0.281146	0.245391	0.255338	0.17963	0.0592992	0.0177737	-0.133394	0.0128042			-0.26138	0.529389	0.0801607	0.127126	0.0107674	0.162308	-0.109735	-0.243499	0.206028	-0.127176	0.0405329	-0.296499	-0.669882	-0.700271	-8.50517	-1.09599
GRCS29	0.321932	0.206748	0.314997	0.180371	0.23586	0.245792	0.280445	0.231434	0.204963	0.270543	0.236326	0.0618634	-0.0398799	-0.114294	-0.145824	-0.161628	-0.100195			-0.357789	0.523574	-0.427388	0.30764	0.0421105	0.140985	-0.174761	-0.114377	0.319959	-0.126475	-0.738229	-1.64464	1.86595	0.275868	0.108383	-0.38009
GRCS30	0.395259	0.352624	0.424983	0.400885	0.361783	0.382869	0.42089	0.399432	0.366756	0.415948	0.39817	0.322584	0.281298	0.167248	0.179219	-0.112266	0.085264			-0.107867	0.205202	-0.0567023	-0.0975402	0.0582829	0.0993078	-0.0509828	-0.0818057	0.134126	-0.0427397	-0.189834	-0.127986	-0.405441	0.0715744	-1.62642	-1.75948
GRCS31	0.47926	0.381817	0.398311	0.383358	0.398921	0.361302	0.364208	0.281084	0.335886	0.316974	0.136553	0.118785	0.0134198	0.00167681	-0.202003	-0.424029	-0.275721			-0.203319	0.0431964	-0.0375395	0.0405969	-0.0943027	0.00804451	-0.228234	0.194968	-0.0563061	-0.569196	-0.130121	-0.887024	-0.875049	-121.468	1.09912	-0.349758
GRCS32	0.10022	0.0452045	0.108844	0.0929986	0.0442044	0.0466496	0.105066	0.0858305	0.0260958	0.158369	0.121316	0.10886	0.0691686	-0.0447411	-0.0306614	-0.213862	-0.121323			-0.548945	1.40781	-0.145578	-0.524676	0.0553138	1.25223	-0.183077	-0.695961	5.06874	-0.233968	-0.102669	-0.364611	-1.64684	-0.314692	5.97496	-0.432702
GRCS33	-0.123195	-0.185444	-0.0514076	-0.0398021	-0.108508	0.0180582	0.0905096	0.0232677	-0.171284	-0.0849765	-0.218691	-0.234904	-0.361127	-0.227	-0.352579	-0.488284	-0.43437			0.505284	-0.722787	-0.225755	1.7262	-1.16642	4.0121	-0.742926	-8.36147	-0.503886	1.57354	0.07414	0.537335	-0.371412	0.553212	0.384893	-0.110415
GRCS34	0.235178	0.238896	0.269463	0.287691	0.305367	0.276017	0.33895	0.304759	0.0494597	0.137439	0.243076	0.187358	0.0131217	-0.208168	-0.298438	-0.425741	-0.269882			0.0158118	0.12795	0.0676466	0.0614386	-0.0961125	0.228003	-0.100874	-0.837709	1.7788	0.768617	-0.229222	-0.929964	-16.8643	0.433645	0.426562	-0.366088
GRCS35																				#DIV/0!	#DIV/0!	#DIV/0!	#DIV/0!	#DIV/0!	#DIV/0!	#DIV/0!	#DIV/0!	#DIV/0!	#DIV/0!	#DIV/0!	#DIV/0!	#DIV/0!	#DIV/0!	#DIV/0!	#DIV/0!
HRVS1	0.0309653	0.0134674	-0.0353551	-0.194998	-0.139991	-0.237456	-0.249443	-0.184435	-0.185981	-0.22137	-0.19709	-0.154442	-0.076799	0.120618	-0.192856	-0.242525	-0.248935			-0.565082	-3.62524	4.51541	-0.28209	0.696229	0.0504791	-0.260614	0.00838389	0.190281	-0.109681	-0.216388	-0.502731	-2.57057	-2.5989	0.257545	0.0264297
HRVS2	-0.892131	-0.88082	-0.839226	-0.891859	-0.855791	-0.892986	-0.902951	-0.878219	-0.913583	-0.89391	-0.868503	-0.587143	-0.501085	-0.526928	-0.254762	-0.203175	-0.25509			-0.0126787	-0.0472217	0.0627151	-0.0404411	0.043463	0.0111589	-0.02739	0.0402674	-0.0215335	-0.0284223	-0.32396	-0.146571	0.0515759	-0.516515	-0.20249	0.255518
HRVS3	0.355112	0.357599	0.316668	0.192941	0.278756	0.168625	0.153174	0.226837	0.223632	0.203431	0.238594	0.190753	0.260071	0.283699	0.111105	-0.0066061	-0.016649			0.00700365	-0.114461	-0.390715	0.444772	-0.395081	-0.0916293	0.480912	-0.0141268	-0.0903332	0.172852	-0.200512	0.36339	0.0908492	-0.608368	-1.05946	1.52025
HRVS4	-0.173093	-0.179847	-0.192799	-0.291999	-0.264332	-0.33212	-0.354617	-0.32316	-0.319151	-0.307999	-0.272445	-0.254398	-0.24432	-0.221903	-0.287983	-0.292423	-0.348385			0.0390171	0.0720205	0.514523	-0.0947519	0.256453	0.0677361	-0.0887063	-0.0124052	-0.0349441	-0.115436	-0.0662411	-0.0396134	-0.0917539	0.297791	0.0154164	0.191375
HRVS5	-0.208514	-0.209306	-0.216195	-0.286227	-0.26727	-0.293519	-0.30027	-0.282487	-0.282047	-0.273956	-0.328487	-0.200974	-0.20013	-0.191917	-0.216491	-0.191589	-0.238038			0.00379924	0.0329142	0.32393	-0.0662313	0.0982118	0.0230005	-0.0592226	-0.00155787	-0.0286872	0.19905	-0.388183	-0.00420025	-0.0410371	0.128044	-0.115025	0.242439
HRVS6	-0.200192	-0.19949	-0.202983	-0.295788	-0.2762	-0.331569	-0.339351	-0.310622	-0.305948	-0.388268	-0.433904	-0.244432	-0.235779	-0.241086	-0.359093	-0.531079	-0.350874			-0.00350675	0.0175105	0.457205	-0.0662221	0.200465	0.0234701	-0.0846576	-0.0150486	0.269067	0.117538	-0.436669	-0.0353972	0.0225052	0.489484	0.478945	-0.339319
HRVS7	-0.229291	-0.226859	-0.220538	-0.324143	-0.298145	-0.371556	-0.390328	-0.353984	-0.34681	-0.326782	-0.277194	-0.264493	-0.272119	-0.245289	-0.306576	-0.29481	-0.376321			-0.010607	-0.0278611	0.469783	-0.0802048	0.246225	0.0505238	-0.0931124	-0.0202654	-0.0577504	-0.151745	-0.045822	0.0288343	-0.0985977	0.249857	-0.0383785	0.276486
HRVS8	-0.360827	-0.258513	-0.220353	-0.237956	-0.244664	-0.242472	-0.292508	-0.155751	-0.165686	-0.156475	-0.168394	-0.813239	-0.854898	-0.709629	-0.835999	-0.850682	-0.88336			-0.283552	-0.147616	0.0798861	0.0281888	-0.00895658	0.206359	-0.467534	0.0637902	-0.0555921	0.0761667	3.82939	0.0512258	-0.169926	0.178078	0.0175643	0.0384132
HRVS9	-0.112976	-0.205648	-0.120576	-0.245221	-0.219733	-0.304418	-0.336637	-0.29236	-0.288522	-0.349251	-0.237439	-0.246023	-0.244027	-0.183456	-0.28733	-0.29886	-0.351176			0.82028	-0.41368	1.03375	-0.103938	0.385397	0.10584	-0.131529	-0.0131274	0.210483	-0.320147	0.0361518	-0.00811499	-0.248213	0.566208	0.0401288	0.175052
HRVS10	-0.203737	-0.207064	-0.210942	-0.29621	-0.277792	-0.327953	-0.348374	-0.321108	-0.317845	-0.307692	-0.280442	-0.251329	-0.360834	-0.441537	-0.309554	-0.27068	-0.32779			0.0163326	0.018728	0.404223	-0.062178	0.180571	0.0622659	-0.0782659	-0.01016	-0.0319431	-0.0885629	-0.103813	0.435705	0.223656	-0.298916	-0.125582	0.210986
HRVS11	-0.111989	-0.101813	-0.126939	-0.266228	-0.247654	-0.324835	-0.352973	-0.31687	-0.313664	-0.30141	-0.261245	-0.251886	-0.244913	-0.17961	-0.285387	-0.297294	-0.344884			-0.0908666	0.246784	1.0973	-0.0697684	0.311648	0.0866235	-0.102283	-0.0101172	-0.039067	-0.133257	-0.0358262	-0.0276809	-0.266639	0.588926	0.0417206	0.160079
HRVS12	-0.272732	-0.199761	-0.0629905	-0.214542	-0.282754	-0.264302	-0.305909	-0.4369	-0.451938	-0.384824	-0.445212	-0.480526	-0.575977	-0.576674	-0.597997	-0.642428	-0.568525			-0.267556	-0.684671	2.40594	0.317943	-0.0652584	0.157423	0.428204	0.0344196	-0.148503	0.156925	0.079319	0.19864	0.00120908	0.0369765	0.0742992	-0.115036
HRVS13	-0.0335621	-0.106737	-0.139317	-0.273119	-0.24445	-0.316085	-0.340933	-0.298124	-0.289258	-0.275235	-0.220164	-0.213525	-0.193678	-0.0710227	-0.254028	-0.275588	-0.321894			2.18029	0.305231	0.960413	-0.104968	0.293045	0.078613	-0.125565	-0.0297369	-0.0484819	-0.200086	-0.0301529	-0.0929524	-0.633295	2.57672	0.0848715	0.168026
HRVS14	-0.0806941	-0.0639219	-0.0482283	-0.214654	-0.196044	-0.287559	-0.327434	-0.281469	-0.275864	-0.262281	-0.21345	-0.227938	-0.230336	-0.156565	-0.28114	-0.296669	-0.347463			-0.207849	-0.245512	3.4508	-0.0866963	0.466806	0.138667	-0.14038	-0.0199138	-0.0492368	-0.186178	0.067873	0.0105236	-0.320276	0.795676	0.0552345	0.171216
HRVS15	-0.122118	-0.0903834	-0.086519	-0.237683	-0.249597	-0.329445	-0.35248	-0.32309	-0.319924	-0.309243	-0.279094	-0.258409	-0.255096	-0.241198	-0.28403	-0.285272	-0.336004			-0.259868	-0.0427548	1.74717	0.0501279	0.319908	0.0699205	-0.0833797	-0.00979874	-0.0333861	-0.097495	-0.074113	-0.0128218	-0.0544817	0.177579	0.00437323	0.177837
HRVS16	-0.196708	-0.199262	-0.200015	-0.296224	-0.277715	-0.330036	-0.350824	-0.322354	-0.318746	-0.308519	-0.281066	-0.256722	-0.292161	-0.241354	-0.28691	-0.280205	-0.335671			0.0129852	0.00377914	0.481008	-0.0624824	0.188396	0.0629889	-0.0811511	-0.0111926	-0.0320874	-0.0889811	-0.0866154	0.138047	-0.173903	0.188753	-0.0233676	0.197947
HRVS17	-0.693958	-0.671278	-0.593678	-0.703472	-0.650591	-0.722291	-0.730659	-0.689472	-0.720052	-0.751225	-0.719267	-0.677145	-0.665812	-0.557525	-0.714984	-0.73799	-0.80122			-0.0326821	-0.1156	0.184938	-0.0751705	0.110207	0.0115853	-0.05637	0.044354	0.0432922	-0.0425408	-0.0585628	-0.0167358	-0.16264	0.282424	0.032178	0.0856783
HRVS18	0.219457	0.226367	0.263462	0.28125	0.29512	0.149335	0.0954419	0.141956	0.141681	-0.183019	-0.24846	-0.030526	-0.25309	-0.271336	-0.328421	-0.491766	-0.345753			0.0314878	0.16387	0.0675176	0.0493154	-0.493987	-0.360885	0.487359	-0.0019389	-2.29177	0.357559	-0.877139	7.29097	0.0720927	0.210384	0.497362	-0.296915
HRVS19	-0.196027	-0.198818	-0.210269	-0.294239	-0.275702	-0.316263	-0.341054	-0.313377	-0.303552	-0.299797	-0.281083	-0.248929	-0.252896	-0.24024	-0.284163	-0.276027	-0.329148			0.0142354	0.0575958	0.399344	-0.0629986	0.14712	0.0783859	-0.0811525	-0.0313493	-0.0123718	-0.062421	-0.114394	0.0159351	-0.0500439	0.18283	-0.0286306	0.192448
HRVS20	-0.0213426	-0.00766133	-0.0110109	-0.240143	-0.207116	-0.327148	-0.370824	-0.318785	-0.326152	-0.310403	-0.240932	-0.25839	-0.237614	-0.0999968	-0.293602	-0.330029	-0.378422			-0.641031	0.437209	20.8095	-0.137533	0.579542	0.133507	-0.140335	0.0231108	-0.0482883	-0.223808	0.0724595	-0.0804037	-0.579164	1.93612	0.124067	0.146632
HRVS21	-0.344039	-0.349862	-0.311916	-0.449299	-0.406114	-0.478874	-0.471344	-0.419255	-0.421684	-0.431323	-0.38704	-0.355137	-0.323276	-0.219793	-0.375071	-0.393192	-0.41756			0.0169241	-0.10846	0.440447	-0.0961149	0.179162	-0.015725	-0.110512	0.00579352	0.0228587	-0.102667	-0.0824285	-0.0897154	-0.320107	0.706475	0.0483117	0.0619754
HRVS22	-0.294752	-0.328185	-0.297522	-0.40789	-0.377227	-0.46821	-0.420963	-0.351802	-0.357295	-0.349366	-0.404995	-0.343596	-0.393306	-0.311444	-0.454415	-0.535926	-0.568237			0.113431	-0.0934324	0.370956	-0.0751743	0.24119	-0.10091	-0.164293	0.0156138	-0.022192	0.159228	-0.151604	0.144675	-0.208138	0.459059	0.179375	0.0602909
HRVS23	-0.13214	-0.143485	-0.128483	-0.249779	-0.219853	-0.303366	-0.308756	-0.271104	-0.260899	-0.235853	-0.195542	-0.174589	-0.150288	0.0284637	-0.125167	-0.135948	-0.204493			0.0858573	-0.104556	0.944062	-0.119809	0.379855	0.017769	-0.121949	-0.0376437	-0.0959981	-0.170916	-0.107155	-0.139189	-1.18939	-5.39743	0.0861303	0.504199
HRVS24	-0.558273	-0.539526	-0.513382	-0.567994	-0.554726	-0.574053	-0.531202	-0.511387	-0.507385	-0.512797	-0.545332	-0.401984	-0.309885	-0.157048	-0.314302	-0.398304	-0.492899			-0.0335808	-0.0484574	0.106376	-0.0233587	0.0348398	-0.0746466	-0.037301	-0.00782601	0.0106668	0.063445	-0.262863	-0.229111	-0.493205	1.00131	0.267265	0.237493
HRVS25	-0.273404	-0.252871	-0.250788	-0.306153	-0.298552	-0.303444	-0.3064	-0.284769	-0.278132	-0.28246	-0.277622	-0.264627	-0.289967	-0.226811	-0.24996	-0.268192	-0.306961			-0.0751009	-0.00823821	0.220764	-0.024829	0.0163855	0.00974291	-0.0705971	-0.023306	0.0155593	-0.0171289	-0.0468078	0.0957594	-0.217805	0.102066	0.0729389	0.144557
HRVS26	-0.393606	-0.382918	-0.385841	-0.474092	-0.458144	-0.480865	-0.486892	-0.453334	-0.443135	-0.449124	-0.443812	-0.422416	-0.376719	-0.314893	-0.415569	-0.408269	-0.445975			-0.0271539	0.00763282	0.228724	-0.0336377	0.0495931	0.0125341	-0.0689245	-0.0224958	0.0135136	-0.0118268	-0.0482109	-0.108178	-0.164119	0.319715	-0.0175645	0.0923545
HRVS27	-0.143388	-0.171675	-0.355001	-0.438696	-0.428711	-0.465124	-0.454268	-0.408132	-0.387412	-0.364314	-0.301146	-0.346645	-0.339603	-0.250064	-0.339225	-0.36854	-0.375311			0.197271	1.06787	0.23576	-0.0227607	0.0849347	-0.0233391	-0.10156	-0.0507678	-0.059623	-0.173388	0.151085	-0.0203146	-0.263657	0.356549	0.0864182	0.0183717
HRVS28	-0.139154	-0.145595	-0.123532	-0.295875	-0.276006	-0.365632	-0.372517	-0.322067	-0.33173	-0.344579	-0.313729	-0.275995	-0.249512	-0.162653	-0.30495	-0.342548	-0.387476			0.0462883	-0.151542	1.39513	-0.0671516	0.324723	0.0188299	-0.135429	0.0300019	0.0387329	-0.0895301	-0.120274	-0.0959554	-0.348116	0.874846	0.123293	0.13116
HRVS29	-0.258997	-0.250559	-0.255915	-0.309029	-0.292485	-0.306372	-0.318393	-0.295959	-0.292181	-0.278604	-0.271657	-0.268812	-0.407525	-0.323074	-0.395821	-0.39696	-0.342276			-0.0325767	0.0213731	0.207547	-0.0535345	0.0474796	0.0392368	-0.0704606	-0.0127642	-0.0464694	-0.024936	-0.0104725	0.516022	-0.207229	0.225171	0.00287915	-0.137757
HRVS30	-0.280625	-0.248459	-0.270494	-0.460975	-0.429301	-0.512642	-0.518982	-0.471534	-0.479296	-0.494081	-0.454164	-0.399861	-0.37128	-0.268483	-0.433726	-0.452272	-0.499055			-0.11462	0.0886827	0.704201	-0.0687115	0.194133	0.0123662	-0.091425	0.0164609	0.0308474	-0.0807909	-0.119566	-0.0714765	-0.276873	0.615469	0.0427604	0.103439
HRVS31	-0.258538	-0.256203	-0.237647	-0.39356	-0.338155	-0.436004	-0.404971	-0.338482	-0.39991	-0.572105	-0.58217	-0.256647	-0.212007	-0.102594	-0.340393	-0.493098	-0.367336			-0.00903315	-0.0724286	0.656074	-0.140778	0.289358	-0.0711749	-0.164182	0.18148	0.430586	0.0175931	-0.559154	-0.173938	-0.51608	2.31785	0.448613	-0.255044
HRVS32	-0.286502	-0.274681	-0.281813	-0.386111	-0.368605	-0.414169	-0.424754	-0.393574	-0.388586	-0.385064	-0.363403	-0.332758	-0.327696	-0.277942	-0.349248	-0.343845	-0.393059			-0.0412605	0.0259645	0.370097	-0.0453381	0.123611	0.0255578	-0.0734081	-0.0126724	-0.00906525	-0.0562531	-0.0843258	-0.0152146	-0.151828	0.256548	-0.0154691	0.143127
HRVS33	-0.216665	-0.372951	-0.320468	-0.416834	-0.390602	-0.434694	-0.432193	-0.396012	-0.391341	-0.400047	-0.383313	-0.335197	-0.318019	-0.180637	-0.332458	-0.464586	-0.37552			0.721321	-0.140724	0.300707	-0.0629337	0.112882	-0.00575213	-0.0837159	-0.0117954	0.0222489	-0.041831	-0.125526	-0.051249	-0.431993	0.840474	0.397428	-0.19171
HRVS34	-0.210074	-0.22636	-0.239827	-0.385479	-0.361101	-0.429526	-0.426723	-0.385841	-0.375752	-0.37947	-0.333483	-0.298154	-0.25934	-0.186655	-0.33499	-0.346423	-0.391743			0.0775257	0.0594942	0.607321	-0.0632388	0.189489	-0.00652524	-0.0958058	-0.0261472	0.00989326	-0.121185	-0.105939	-0.130184	-0.28027	0.794705	0.0341286	0.130823
HRVS35	-0.00540959	-0.0233255	-0.128016	-0.146337	-0.156913	-0.171635	-0.187838	-0.179408	-0.151176	-0.141673	-0.148381									3.31187	4.48823	0.143122	0.0722694	0.0938191	0.0944062	-0.0448771	-0.157363	-0.0628602	0.047346	-1	#DIV/0!	#DIV/0!	#DIV/0!	#DIV/0!	#DIV/0!
HUNS1	0.1051	0.0637343	0.208223	0.0881741	0.0258711	0.0442817	0.0182323	0.0545789	0.00780056	0.0743178	0.0461455	0.13232	0.0557834	0.0868597	0.0244406	-0.425364	-0.233945			-0.393587	2.26704	-0.576539	-0.706591	0.711628	-0.588267	1.99354	-0.857077	8.52723	-0.379078	1.86746	-0.578422	0.557088	-0.71862	-18.404	-0.450012
HUNS2	-0.349951	-0.31368	-0.0928509	-0.12507	-0.128219	-0.163078	-0.191355	-0.207148	-0.178712	-0.165732	-0.190137	-0.212579	-0.213757	-0.159471	-0.150204	-0.133435	-0.145325			-0.103646	-0.703995	0.347003	0.0251776	0.271867	0.173397	0.0825305	-0.137275	-0.0726271	0.147251	0.118032	0.00554091	-0.253961	-0.0581063	-0.111644	0.0891037
HUNS3	0.420505	0.398105	0.439476	0.388411	0.375173	0.384863	0.406419	0.352649	0.334536	0.372084	0.288526	0.321908	0.324878	0.413003	0.266104	-0.497423	-0.0357632			-0.0532679	0.10392	-0.116197	-0.0340807	0.0258263	0.056012	-0.132302	-0.0513624	0.112238	-0.224569	0.115701	0.00922496	0.271258	-0.355685	-2.86928	-0.928103
HUNS4	-0.497829	-0.460222	-0.426092	-0.385653	-0.434135	-0.398657	-0.394288	-0.401917	-0.421094	-0.420083	-0.392895	-0.321077	-0.309425	-0.330749	-0.252359	-0.207491	-0.134343			-0.0755409	-0.0741614	-0.0949058	0.125713	-0.08172	-0.0109589	0.0193474	0.0477136	-0.00240124	-0.064719	-0.182793	-0.0362912	0.0689181	-0.237009	-0.177795	-0.352535
HUNS5	-0.264762	-0.239423	-0.211053	-0.250744	-0.241881	-0.21243	-0.206906	-0.205911	-0.238454	-0.227949	-0.196247	-0.153268	-0.130316	-0.10482	-0.0913506	-0.0840748	-0.0902723			-0.0957047	-0.118492	0.188063	-0.0353466	-0.121759	-0.0260042	-0.00480956	0.158044	-0.0440558	-0.139072	-0.219005	-0.149753	-0.195644	-0.128503	-0.0796479	0.0737146
HUNS6	-0.124775	-0.138816	-0.0823478	-0.122773	-0.157849	-0.157172	-0.162761	-0.15312	-0.16787	-0.15045	-0.155562	-0.113148	-0.101161	-0.0966972	-0.105928	-0.287293	-0.262681			0.112532	-0.406787	0.490914	0.28569	-0.00428646	0.0355622	-0.0592377	0.0963282	-0.10377	0.0339787	-0.272653	-0.105934	-0.0441293	0.095461	1.71216	-0.0856701
HUNS7	-0.304133	-0.304467	-0.361714	-0.396979	-0.425642	-0.377111	-0.387064	-0.389792	-0.411434	-0.39399	-0.402868	-0.274374	-0.365213	-0.315539	-0.294876	-0.248633	-0.14428			0.00109754	0.188025	0.0974943	0.0722022	-0.114019	0.0263923	0.00704857	0.0555218	-0.0423969	0.0225327	-0.318947	0.331074	-0.136014	-0.0654836	-0.156821	-0.419709
HUNS8	-0.808167	-0.808796	-0.807433	-0.838742	-0.856473	-0.86452	-0.855202	-0.786519	-0.803086	-0.784374	-0.729337	-0.703002	-0.725888	-0.604527	-0.669875	-0.72359	-0.518904			0.000778225	-0.00168602	0.0387759	0.0211403	0.00939613	-0.0107793	-0.0803111	0.0210634	-0.0233003	-0.0701668	-0.0361076	0.0325539	-0.16719	0.108098	0.0801865	-0.282875
HUNS9	-0.52096	-0.525875	-0.461301	-0.572786	-0.599532	-0.584507	-0.597086	-0.603166	-0.767646	-0.750055	-0.758398	-0.512506	-0.379917	-0.131258	-0.232076	-0.352347	-0.182585			0.00943375	-0.122794	0.241675	0.046695	-0.0250612	0.0215204	0.0101832	0.272694	-0.022915	0.0111227	-0.324225	-0.258708	-0.654509	0.76809	0.518242	-0.481805
HUNS10	-0.434906	-0.452522	-0.480817	-0.541218	-0.550967	-0.554771	-0.582459	-0.564404	-0.607863	-0.576535	-0.551876	-0.422983	-0.538177	-0.269629	-0.297873	-0.246917	-0.342146			0.0405033	0.0625285	0.125621	0.0180141	0.00690294	0.0499089	-0.0309981	0.0770001	-0.0515373	-0.0427717	-0.233553	0.272336	-0.498995	0.104749	-0.171067	0.385675
HUNS11	-0.294423	-0.314639	-0.298738	-0.310395	-0.323603	-0.346444	-0.302097	-0.23293	-0.272399	-0.255662	-0.228982	-0.170127	-0.190874	-0.105051	-0.11138	-0.275842	-0.109236			0.0686639	-0.0505402	0.0390239	0.0425507	0.0705844	-0.128006	-0.228957	0.169448	-0.0614461	-0.104355	-0.25703	0.121953	-0.449632	0.0602467	1.47658	-0.603992
HUNS12	-0.690194	-0.692956	-0.645672	-0.687671	-0.705109	-0.717009	-0.70212	-0.694051	-0.71981	-0.713842	-0.713953	-0.695222	-0.653176	-0.364626	-0.407638	-0.403817	-0.290462			0.00400201	-0.0682356	0.065048	0.0253576	0.0168769	-0.020765	-0.0114932	0.0371139	-0.00829022	0.000155437	-0.026236	-0.0604791	-0.441764	0.117962	-0.00937196	-0.28071
HUNS13	-0.593884	-0.621203	-0.58272	-0.623512	-0.697194	-0.721151	-0.715612	-0.712193	-0.727844	-0.715834	-0.674829	-0.611201	-0.631184	-0.333883	-0.324003	-0.328682	0.0340441			0.0460019	-0.0619505	0.0700039	0.118172	0.0343621	-0.00768061	-0.00477794	0.0219754	-0.0164999	-0.0572828	-0.0942884	0.0326943	-0.471021	-0.0295897	0.0144405	-1.10358
HUNS14	-0.856587	-0.848681	-0.869417	-0.908964	-0.905665	-0.895977	-0.890547	-0.887792	-0.900309	-0.895014	-0.89248	-0.848501	-0.83837	-0.766463	-0.798291	-0.753066	-0.716042			-0.00922982	0.0244324	0.0454878	-0.00362935	-0.0106971	-0.00606115	-0.00309345	0.0140993	-0.00588171	-0.00283139	-0.0492771	-0.0119403	-0.0857695	0.0415253	-0.0566525	-0.0491634
HUNS15	-0.812889	-0.828272	-0.770997	-0.8177	-0.812265	-0.830559	-0.836369	-0.850501	-0.865483	-0.85754	-0.851882	-0.844386	-0.839321	-0.818616	-0.803692	-0.827669	-0.735436			0.0189237	-0.0691497	0.0605745	-0.00664632	0.0225227	0.00699543	0.0168963	0.0176158	-0.0091775	-0.00659829	-0.00879931	-0.00599822	-0.0246685	-0.0182315	0.0298332	-0.111436
HUNS16	-0.1267	-0.142646	-0.0837558	-0.130891	-0.169272	-0.178814	-0.173955	-0.188501	-0.19072	-0.188427	-0.209274	-0.142834	-0.196082	-0.147611	-0.135633	-0.112811	-0.104477			0.125861	-0.412843	0.562765	0.293232	0.0563732	-0.0271748	0.0836202	0.01177	-0.0120241	0.110636	-0.317477	0.372794	-0.247195	-0.0811433	-0.168264	-0.0738747
HUNS17	-0.64784	-0.644212	-0.526561	-0.600361	-0.640637	-0.702141	-0.668382	-0.420757	-0.407466	-0.317625	-0.312633	-0.231703	-0.185649	-0.334362	-0.366479	-0.492578	0.0209269			-0.00560049	-0.182627	0.140154	0.0670858	0.0960054	-0.04808	-0.370484	-0.0315881	-0.220487	-0.0157178	-0.258865	-0.198764	0.801045	0.0960544	0.344081	-1.04248
HUNS18	-0.10048	-0.0446065	0.0436659	-0.140958	-0.228189	-0.221451	-0.271568	-0.262676	-0.307904	-0.233504	-0.258369	-0.171161	-0.45221	-0.275701	-0.191206	-0.222072	-0.0785224			-0.556066	-1.97891	-4.22811	0.618838	-0.0295286	0.226312	-0.0327407	0.172181	-0.241634	0.106486	-0.337535	1.64202	-0.390325	-0.306474	0.161432	-0.646411
HUNS19	0.0457584	0.0260477	0.0449429	-0.0754422	-0.0951609	-0.257037	-0.295766	-0.318637	-0.313123	-0.309846	-0.332352	-0.256979	-0.251052	-0.444672	-0.447724	-0.449841	-0.230553			-0.430756	0.725412	-2.67862	0.261375	1.70108	0.150674	0.0773278	-0.0173056	-0.0104664	0.0726364	-0.226787	-0.0230633	0.771236	0.00686303	0.0047276	-0.487478
HUNS20	0.00625874	0.0320617	0.140292	0.0719905	-0.0952797	-0.146116	-0.118584	-0.171496	-0.196184	-0.178987	-0.256599	-0.0749683	0.00137355	0.154653	0.150295	0.15068	0.140136			4.12271	3.37568	-0.486852	-2.3235	0.533551	-0.188426	0.446201	0.143951	-0.0876543	0.433616	-0.707838	-1.01832	111.593	-0.0281786	0.00256143	-0.0699714
HUNS21	-0.0592195	-0.0869209	-0.0349076	-0.153326	-0.0923042	-0.139062	-0.0393467	-0.107355	-0.119675	-0.112669	-0.172124	0.042955	-0.0334482	0.0480434	0.0687776	0.0735065	0.144638			0.467775	-0.598398	3.39233	-0.397987	0.506567	-0.717058	1.72843	0.114763	-0.0585381	0.527689	-1.24956	-1.77868	-2.43635	0.431574	0.0687552	0.967695
HUNS22	0.22949	0.216654	0.286642	0.236948	0.189762	0.172454	0.167521	0.116023	0.0901911	0.0994817	0.0665308	0.185509	0.088191	0.092641	-0.0130698	-0.450737	-0.238962			-0.0559355	0.323044	-0.173366	-0.199141	-0.0912099	-0.028606	-0.307414	-0.222642	0.10301	-0.331226	1.78832	-0.5246	0.0504586	-1.14108	33.4869	-0.469842
HUNS23	-0.49335	-0.480854	-0.418998	-0.494733	-0.549341	-0.578177	-0.556874	-0.505079	-0.540127	-0.521319	-0.480046	-0.276678	-0.31785	-0.0534314	-0.171514	-0.268857	-0.103271			-0.0253271	-0.128639	0.180754	0.110378	0.0524921	-0.0368454	-0.0930093	0.0693912	-0.0348227	-0.0791709	-0.423642	0.148811	-0.831898	2.20998	0.567552	-0.615889
HUNS24	-0.0749334	-0.123536	-0.105719	-0.141814	-0.132019	-0.143208	-0.126235	-0.133119	-0.128018	-0.130744	-0.108561	-0.0913994	-0.115891	-0.0914237	-0.0814162	-0.100992	-0.110519			0.648608	-0.144222	0.341419	-0.069072	0.0847532	-0.118519	0.0545336	-0.0383194	0.0212981	-0.169666	-0.158086	0.267962	-0.211123	-0.109463	0.240446	0.0943331
HUNS25	-0.430414	-0.409957	-0.336836	-0.394434	-0.478758	-0.487607	-0.472563	-0.50146	-0.513116	-0.499059	-0.50365	-0.396032	-0.432498	-0.297025	-0.286946	-0.410951	-0.253744			-0.0475294	-0.178363	0.170998	0.213783	0.0184835	-0.0308534	0.0611496	0.0232452	-0.0273952	0.00919864	-0.213677	0.0920803	-0.313233	-0.0339359	0.432157	-0.382544
HUNS26	-0.0826152	-0.149933	-0.122039	-0.16923	-0.11806	-0.254008	-0.267933	-0.274742	-0.283302	-0.287289	-0.315016	-0.203198	-0.284025	-0.253718	-0.232324	-0.228211	-0.165585			0.814836	-0.186045	0.386687	-0.302365	1.15151	0.0548202	0.025414	0.0311573	0.0140725	0.0965117	-0.354958	0.397773	-0.106704	-0.0843239	-0.017705	-0.274419
HUNS27	0.098119	0.0566203	0.0818311	-0.0385614	-0.051376	-0.251541	-0.301506	-0.33989	-0.333719	-0.339191	-0.353123	-0.270867	-0.232272	-0.133835	-0.102521	-0.0957339	-0.114404			-0.422943	0.445261	-1.47123	0.332317	3.89607	0.198637	0.127309	-0.0181576	0.0163985	0.041073	-0.232937	-0.142488	-0.423799	-0.233981	-0.0661977	0.195018
HUNS28	0.176607	0.151581	0.185744	0.0555648	0.0297159	-0.213271	-0.279723	-0.329222	-0.341349	-0.329418	-0.353133	-0.254383	-0.205324	-0.0669404	-0.0515284	-0.022506	-0.0526526			-0.141702	0.225377	-0.700853	-0.465202	-8.17698	0.311586	0.176958	0.0368362	-0.0349534	0.0719912	-0.279641	-0.192852	-0.673977	-0.230235	-0.563231	1.33949
HUNS29	0.227844	0.214164	0.29175	0.258727	0.215036	0.0193717	-0.071662	-0.132841	-0.161349	-0.158013	-0.185279	0.0333813	-0.196937	-0.0972543	-0.0673493	-0.112145	-0.00181355			-0.060042	0.362277	-0.113189	-0.16887	-0.909914	-4.69932	0.853721	0.214602	-0.0206781	0.172556	-1.18017	-6.89963	-0.506166	-0.307493	0.66512	-0.983828
HUNS30	0.152668	0.120309	0.167387	0.0234124	-0.024086	-0.309984	-0.384062	-0.439186	-0.447412	-0.436091	-0.463901	-0.315376	-0.230345	0.0194565	0.0415511	0.0892932	0.025488			-0.211954	0.391302	-0.86013	-2.02877	11.8699	0.238971	0.14353	0.0187304	-0.0253026	0.0637697	-0.320165	-0.269619	-1.08447	1.13559	1.149	-0.714559
HUNS31	-0.208944	-0.228157	-0.106123	-0.132002	-0.105575	-0.213415	-0.113048	-0.0922712	-0.126477	-0.164815	-0.219486	-0.0760554	-0.298249	-0.196808	-0.15904	-0.151058	-0.064758			0.0919504	-0.534868	0.243864	-0.200202	1.02145	-0.470292	-0.183785	0.37071	0.303119	0.331716	-0.653484	2.92148	-0.340122	-0.191905	-0.0501839	-0.571305
HUNS32	-0.297299	-0.313311	-0.27181	-0.293329	-0.25511	-0.292714	-0.217419	-0.219643	-0.208737	-0.208255	-0.228096	-0.133616	-0.279977	-0.203097	-0.186468	-0.209169	-0.138689			0.0538601	-0.13246	0.0791692	-0.130293	0.147403	-0.257233	0.0102315	-0.0496528	-0.00231225	0.0952759	-0.414212	1.09538	-0.274594	-0.0818761	0.121742	-0.336951
HUNS33	-0.200919	-0.212761	-0.235094	-0.274208	-0.328963	-0.331663	-0.243242	-0.389289	-0.512956	-0.521732	-0.50069	-0.245901	-0.225252	-0.150418	-0.113781	-0.156967	-0.0896708			0.0589397	0.104969	0.166378	0.199682	0.00821002	-0.266601	0.600421	0.317675	0.0171087	-0.0403316	-0.508875	-0.0839724	-0.332223	-0.243565	0.37955	-0.428729
HUNS34	-0.394917	-0.218226	-0.494588	-0.539906	-0.527099	-0.137595	-0.210921	-0.274074	-0.299603	-0.294627	-0.331467	-0.159849	-0.107152	-0.0662724	-0.00631231	-0.0166271	0.0379244			-0.447411	1.2664	0.0916281	-0.0237212	-0.738959	0.53292	0.299411	0.0931497	-0.0166114	0.125042	-0.517753	-0.32967	-0.381509	-0.904752	1.63408	-3.28087
HUNS35																				#DIV/0!	#DIV/0!	#DIV/0!	#DIV/0!	#DIV/0!	#DIV/0!	#DIV/0!	#DIV/0!	#DIV/0!	#DIV/0!	#DIV/0!	#DIV/0!	#DIV/0!	#DIV/0!	#DIV/0!	#DIV/0!
INOS1	0.135551	0.209711	0.223425	0.115114	0.0982948	0.0698141	0.0376196	0.0341562	0.0843955	0.329453	0.383064	0.451306	0.509028	0.529337	0.164919	-0.074666	0.200368			0.547099	0.0653934	-0.484774	-0.146111	-0.289748	-0.461146	-0.0920622	1.47087	2.90368	0.162725	0.178149	0.127899	0.0398983	-0.688442	-1.45274	-3.68353
INOS2	-0.634847	-0.494513	0.0214845	-0.0405099	-0.0763547	-0.120501	-0.216307	-0.0942999	-0.0155515	0.247438	0.306075	0.376849	0.444548	0.534275	0.269026	-0.0274972	0.0451004			-0.221051	-1.04345	-2.88554	0.88484	0.57817	0.795064	-0.564045	-0.835085	-16.9109	0.236977	0.23123	0.179647	0.201838	-0.496465	-1.10221	-2.64018
INOS3	0.532762	0.590986	0.657063	0.604278	0.606758	0.603895	0.578386	0.570798	0.563175	0.640202	0.647176	0.663581	0.682318	0.683815	0.376494	0.308415	0.488291			0.109287	0.111808	-0.0803338	0.00410334	-0.00471853	-0.0422405	-0.0131202	-0.0133539	0.136773	0.0108932	0.0253482	0.0282365	0.00219316	-0.449421	-0.180824	0.583229
INOS4	0.0402197	-0.347776	-0.156908	-0.271315	-0.360057	-0.352524	-0.429603	-0.571641	-0.778726	-0.720983	-0.756039	-0.627626	-0.575875	-0.483942	-0.502705	-0.581712	-0.610692			-9.6469	-0.548825	0.729138	0.327082	-0.0209205	0.218647	0.330626	0.362264	-0.0741502	0.0486228	-0.16985	-0.0824553	-0.15964	0.0387702	0.157165	0.0498186
INOS5	-0.0950637	-0.49367	-0.468819	-0.471534	-0.440159	-0.411178	-0.393457	-0.38614	-0.565252	-0.501	-0.539495	-0.312487	-0.264909	-0.287197	-0.326855	-0.366644	-0.283072			4.19304	-0.0503386	0.0057902	-0.0665381	-0.0658423	-0.0430963	-0.0185975	0.463851	-0.11367	0.0768373	-0.420778	-0.152257	0.0841341	0.138086	0.121735	-0.227937
INOS6	0.0666306	0.110569	0.099821	-0.00156857	-0.0140097	-0.0400115	-0.0592848	-0.0612759	-0.0234321	0.184408	0.204612	0.232719	0.247967	0.245891	-0.036721	-0.144884	-0.0178922			0.659436	-0.0972082	-1.01571	7.93151	1.85599	0.481694	0.0335855	-0.617597	-8.86988	0.109564	0.137366	0.0655195	-0.0083695	-1.14934	2.94553	-0.876506
INOS7	-0.0539633	-0.0609243	0.0703669	-0.00639987	-0.00315275	-0.0116587	-0.119776	-0.0552259	-0.038447	0.112139	0.0955946	0.130819	0.189719	0.260119	0.055677	-0.0317404	-0.00377379			0.128995	-2.15499	-1.09095	-0.507374	2.69795	9.27353	-0.538924	-0.303823	-3.91673	-0.147538	0.368473	0.450245	0.371075	-0.785956	-1.57008	-0.881104
INOS8	-0.209639	0.0238476	0.385192	0.317635	0.308778	0.29621	0.174322	0.178333	0.283814	0.458049	0.483478	0.488435	0.520609	0.575684	0.360898	0.223109	0.240407			-1.11376	15.1522	-0.175385	-0.0278832	-0.0407038	-0.411492	0.0230088	0.591488	0.613905	0.0555149	0.0102531	0.0658717	0.105788	-0.373097	-0.381794	0.0775284
INOS9	-0.32835	-0.236092	-0.0155761	0.0344738	0.000305745	-0.00630016	-0.108739	-0.00228443	0.0215119	0.246346	0.280259	0.360765	0.396052	0.464902	0.156678	-0.0401041	0.123614			-0.280976	-0.934025	-3.21325	-0.991131	-21.6059	16.2597	-0.978992	-10.4168	10.4516	0.137663	0.287257	0.0978129	0.173839	-0.662988	-1.25597	-4.08233
INOS10	0.00366148	0.143758	0.263515	0.161794	0.137959	0.122846	0.0760563	0.0567486	0.0953238	0.294522	0.317381	0.3397	0.35643	0.351515	0.0461016	-0.110512	0.0278414			38.2624	0.833046	-0.386016	-0.147318	-0.109549	-0.38088	-0.253861	0.679758	2.0897	0.0776154	0.0703199	0.0492498	-0.0137895	-0.868849	-3.39714	-1.25193
INOS11	-0.478122	-0.363142	0.0359018	-0.018087	-0.0468689	-0.0576452	-0.145345	-0.0512425	-0.0213418	0.183724	0.22071	0.286025	0.316918	0.366949	0.158451	0.000823228	0.0276934			-0.240482	-1.09886	-1.50379	1.5913	0.229925	1.52136	-0.647441	-0.583514	-9.60865	0.201314	0.295931	0.108007	0.15787	-0.568194	-0.994805	32.64
INOS12	-0.397439	-0.244423	0.200352	0.0930716	0.0590586	0.0378223	-0.0671289	0.0422723	0.0869955	0.305319	0.330496	0.397642	0.434244	0.499299	0.292471	0.181041	0.193002			-0.385005	-1.81969	-0.53546	-0.365449	-0.35958	-2.77485	-1.62972	1.05798	2.50959	0.0824616	0.203168	0.0920455	0.149814	-0.414238	-0.380995	0.0660673
INOS13	-0.0701002	-0.195473	-0.072711	-0.322173	-0.311589	-0.387327	-0.343862	-0.506553	-0.470956	0.059722	-0.224089	-0.0577836	-0.00400102	0.115787	-0.190164	-0.0524253	-0.0230518			1.78848	-0.628025	3.43086	-0.0328499	0.243069	-0.112219	0.47313	-0.0702729	-1.12681	-4.7522	-0.74214	-0.930759	-29.9394	-2.64235	-0.724315	-0.560293
INOS14	-0.251569	-0.346132	-0.164986	-0.160479	-0.208185	-0.323353	-0.418975	-0.398308	-0.357202	-0.346703	-0.407325	-0.576593	-0.496724	-0.399859	-0.444695	-0.532197	-0.458027			0.375894	-0.523345	-0.0273147	0.297272	0.553198	0.295721	-0.0493262	-0.103203	-0.0293932	0.174854	0.41556	-0.138519	-0.195009	0.112131	0.196769	-0.139366
INOS15	-0.110674	-0.432772	0.112735	0.0263483	0.0404392	0.0237783	-0.0956178	-0.0121187	0.00542728	0.178204	0.155428	0.226321	0.271705	0.327502	0.109491	0.00735171	0.0348127			2.91033	-1.26049	-0.766281	0.534791	-0.411999	-5.02123	-0.873259	-1.44784	31.8348	-0.127807	0.456112	0.20053	0.20536	-0.665677	-0.932856	3.73532
INOS16	-0.00347609	0.0145086	-0.019002	-0.0435556	-0.0315504	-0.0461089	-0.11227	-0.0828014	-0.0732955	0.0379811	0.0101352	0.0528516	0.103421	0.159213	0.0089611	-0.0751503	-0.049521			-5.17381	-2.30971	1.29216	-0.27563	0.461439	1.43489	-0.262481	-0.114803	-1.51819	-0.733151	4.21465	0.956825	0.539454	-0.943716	-9.38629	-0.34104
INOS17	-0.383824	-0.248049	0.110882	0.0209979	0.00585583	-0.0110959	-0.115669	-0.0164428	-0.314301	-0.558399	-0.462254	-0.221677	-0.283734	0.047201	-0.418492	-0.616098	-0.511227			-0.353743	-1.44702	-0.810629	-0.721124	-2.89485	9.42447	-0.857846	18.1148	0.776635	-0.172179	-0.520443	0.279942	-1.16636	-9.86618	0.472184	-0.170218
INOS18	0.386822	0.258738	0.444114	0.333007	0.300289	0.241466	0.269796	0.246599	0.377522	0.626562	0.667629	0.714644	0.740083	0.781651	0.613502	0.473442	0.471061			-0.331117	0.716462	-0.250176	-0.0982507	-0.19589	0.117326	-0.0859792	0.530915	0.659669	0.0655439	0.0704204	0.0355971	0.0561664	-0.21512	-0.228296	-0.0050286
INOS19	0.140604	0.0754038	0.053689	-0.0274048	-0.0527128	-0.0510568	-0.0560255	-0.0137392	-0.226125	-0.531273	0.0384735	0.106867	0.162972	0.226393	0.0299322	0.00785816	0.00716296			-0.463717	-0.28798	-1.51044	0.923486	-0.0314155	0.0973172	-0.754768	15.4583	1.34947	-1.07242	1.77769	0.524995	0.389152	-0.867787	-0.737468	-0.0884686
INOS20	0.0144826	0.0180422	0.203747	0.0916071	0.102225	0.0823566	-0.105895	0.0235314	0.0511694	0.273015	0.275501	0.386279	0.44584	0.555894	0.278645	0.0802627	0.111138			0.245791	10.2928	-0.550389	0.115902	-0.194356	-2.28581	-1.22221	1.17452	4.33552	0.00910524	0.402095	0.154193	0.246846	-0.498745	-0.711953	0.384676
INOS21	-0.137657	-0.172896	0.102753	0.00284556	0.00175062	-0.00975815	-0.0605157	-0.0541068	-0.0400675	-0.0499632	0.105747	0.260966	0.325939	0.444934	0.155385	-0.0178058	0.0149916			0.255997	-1.5943	-0.972307	-0.384792	-6.57413	5.20156	-0.105905	-0.259474	0.246977	-3.1165	1.46784	0.24897	0.365082	-0.650767	-1.11459	-1.84195
INOS22	0.271514	0.337389	0.445509	0.384713	0.386838	0.38609	0.354461	0.345166	0.310684	0.0817719	0.160861	0.448096	0.493455	0.469809	0.0302837	-0.0835189	0.193645			0.24262	0.320462	-0.136466	0.00552565	-0.00193526	-0.0819212	-0.0262224	-0.0998991	-0.7368	0.967189	1.78562	0.101225	-0.0479196	-0.93554	-3.75789	-3.31857
INOS23	-0.534683	-0.474172	0.254659	-0.159864	-0.291354	-0.375828	-0.508799	-0.381301	-0.39691	-0.452937	-0.357735	-0.101189	0.100005	0.496491	0.273241	0.173012	0.222521			-0.113172	-1.53706	-1.62776	0.82251	0.289937	0.353809	-0.250586	0.0409369	0.141158	-0.210189	-0.717141	-1.98831	3.96465	-0.449657	-0.366815	0.28616
INOS24	-0.399806	-0.275826	0.0590628	-0.020922	-0.0438979	-0.0570356	-0.124705	-0.090239	0.0269663	0.159601	0.045349	0.147203	0.227877	0.293949	0.0911569	0.00783814	0.0532314			-0.3101	-1.21413	-1.35423	1.09817	0.299277	1.18643	-0.276377	-1.29883	4.91854	-0.71586	2.246	0.548044	0.289945	-0.689888	-0.914015	5.79133
INOS25	-0.381195	-0.293852	0.0164277	-0.00412661	-0.119862	-0.308126	-0.397828	-0.390907	-0.457267	-0.525179	-0.389498	-0.155063	-0.0804848	0.367819	0.143671	0.173047	0.226297			-0.229129	-1.0559	-1.2512	28.0462	1.57066	0.291121	-0.0173946	0.169759	0.148516	-0.258351	-0.60189	-0.480955	-5.57004	-0.609397	0.204464	0.307721
INOS26	-0.0849267	-0.124608	-0.106872	-0.133399	-0.133855	-0.14326	-0.146946	-0.139443	-0.0914362	0.0954913	0.129393	0.214524	0.293935	0.420163	0.130277	-0.0829345	-0.0289453			0.46724	-0.142336	0.248213	0.00341841	0.0702658	0.0257263	-0.0510533	-0.344278	-2.04435	0.35502	0.657931	0.370175	0.429439	-0.689937	-1.6366	-0.650987
INOS27	0.00775145	0.0362117	0.124952	0.00380981	0.0403904	0.0805432	-0.0149205	-0.0188268	-0.0262439	0.112806	0.128331	0.180607	0.250021	0.371177	0.0977192	-0.0487106	-0.00759393			3.6716	2.4506	-0.96951	9.6017	0.994117	-1.18525	0.26181	0.393961	-5.29837	0.137631	0.407349	0.384336	0.484583	-0.736731	-1.49848	-0.844101
INOS28	0.119074	0.089617	0.039938	0.0839119	0.110892	0.127216	0.0519524	0.0316705	0.0161802	0.130697	0.147304	0.178077	0.233162	0.331651	0.115641	0.0487284	0.0732001			-0.247386	-0.554348	1.10105	0.321531	0.147201	-0.59162	-0.390393	-0.489108	7.07759	0.127067	0.208902	0.309332	0.422407	-0.651317	-0.578623	0.502205
INOS29	0.00538535	-0.139226	0.0164509	-0.0920795	-0.109675	-0.145375	-0.132766	-0.125196	-0.0433849	0.206104	0.253895	0.312475	0.376488	0.478648	0.190965	-0.0749264	-0.0113723			-26.8528	-1.11816	-6.59724	0.191087	0.325507	-0.0867336	-0.0570124	-0.653466	-5.7506	0.231878	0.230723	0.204857	0.271351	-0.601033	-1.39236	-0.848221
INOS30	-0.0597478	0.000877866	0.0110756	-0.00168189	0.00109197	0.0142443	-0.0526876	-0.0205323	-0.0346695	0.0898516	0.112229	0.168956	0.24437	0.365326	0.0984562	0.026775	0.0528321			-1.01469	11.6165	-1.15186	-1.64925	12.0447	-4.69884	-0.6103	0.688531	-3.59167	0.249044	0.505461	0.446352	0.494972	-0.730498	-0.728052	0.97319
INOS31	0.204566	0.234495	0.325714	0.216949	0.232995	0.241558	0.22672	0.225702	0.204717	0.123509	0.168984	0.367072	0.368681	0.486726	0.186339	-0.0161954	0.126059			0.146309	0.388998	-0.333926	0.0739598	0.0367524	-0.0614245	-0.00449054	-0.0929798	-0.396684	0.368197	1.17223	0.00438488	0.32018	-0.617158	-1.08691	-8.7836
INOS32	0.137794	0.0970234	0.209914	0.117711	0.12517	0.127204	0.0331216	0.0844045	0.083904	0.20016	0.199032	0.21796	0.274765	0.389411	0.124512	-0.00358109	0.0268754			-0.29588	1.16353	-0.439243	0.0633686	0.0162501	-0.739618	1.54832	-0.00593033	1.38558	-0.00563311	0.0950984	0.260624	0.41725	-0.680254	-1.02876	-8.50481
INOS33	-0.150724	-0.0772611	0.122366	0.0544437	0.0635264	0.0638732	0.0379599	0.0364098	0.0518702	0.168458	0.158888	0.167179	0.214991	0.236565	-0.11505	-0.227879	-0.0567006			-0.487401	-2.5838	-0.555076	0.166828	0.00545844	-0.4057	-0.0408334	0.424622	2.24768	-0.0568075	0.0521813	0.285993	0.100349	-1.48633	0.980699	-0.751181
INOS34	-0.105899	-0.121787	-0.0187492	-0.0635328	-0.0543258	-0.0612129	-0.132622	-0.0838806	-0.0655693	0.0615163	0.0472222	0.0983273	0.146165	0.210894	0.0353106	-0.0483799	-0.0186286			0.150028	-0.846048	2.38855	-0.144918	0.126775	1.16656	-0.36752	-0.218302	-1.93819	-0.232362	1.08222	0.486516	0.442848	-0.832567	-2.37013	-0.614953
INOS35																				#DIV/0!	#DIV/0!	#DIV/0!	#DIV/0!	#DIV/0!	#DIV/0!	#DIV/0!	#DIV/0!	#DIV/0!	#DIV/0!	#DIV/0!	#DIV/0!	#DIV/0!	#DIV/0!	#DIV/0!	#DIV/0!
INDS1	-0.109093	-0.0783457	-0.0691779	-0.0175965	-0.0869285	-0.0614564	-0.0707676	-0.00968685	-0.0964229	0.0141769	0.0204194	-0.111234	-0.225953	0.0602802	0.0867854	0.0873507	0.051844			-0.281845	-0.117017	-0.745634	3.94011	-0.293024	0.151509	-0.863117	8.954	-1.14703	0.440332	-6.44744	1.03133	-1.26678	0.439701	0.00651305	-0.406485
INDS2	-0.221682	-0.1893	-0.190595	-0.160411	-0.194828	-0.188114	-0.192532	-0.168054	-0.253456	-0.244051	-0.247327	-0.390408	-0.46892	-0.238397	-0.222424	-0.281987	-0.269365			-0.146076	0.00684225	-0.158366	0.21455	-0.0344601	0.0234869	-0.127137	0.508185	-0.0371076	0.0134239	0.578505	0.201103	-0.491604	-0.0669991	0.267787	-0.0447597
INDS3	0.334399	0.336417	0.350218	0.385803	0.32092	0.317552	0.307007	0.356985	0.303231	0.426403	0.44158	0.448585	0.365417	0.489683	0.504187	0.442217	0.481708			0.00603443	0.0410238	0.10161	-0.168178	-0.0104943	-0.0332049	0.16279	-0.150579	0.406201	0.0355932	0.0158633	-0.185402	0.340068	0.0296183	-0.12291	0.0893013
INDS4	-0.152578	-0.160748	-0.135574	-0.0784648	-0.176442	-0.153904	-0.162315	-0.0841157	-0.151326	0.00366585	0.0457018	-0.00311092	-0.139395	0.0893295	0.0885323	-0.0414088	0.0114771			0.0535442	-0.156607	-0.42124	1.24868	-0.127733	0.0546504	-0.481776	0.799025	-1.02422	11.4669	-1.06807	43.8084	-1.64084	-0.00892498	-1.46773	-1.27716
INDS5	-0.150509	-0.139818	-0.116633	-0.0805667	-0.15165	-0.149244	-0.166426	-0.147952	-0.179069	-0.169364	-0.219591	-0.147848	-0.18582	-0.0986071	-0.151955	-0.174035	-0.153085			-0.0710346	-0.165822	-0.309229	0.882297	-0.0158692	0.11513	-0.111003	0.210316	-0.0541991	0.296561	-0.326711	0.25683	-0.46934	0.541017	0.145304	-0.120377
INDS6	-0.11606	-0.0948568	-0.0817432	-0.0394626	-0.101138	-0.0603866	-0.0920827	-0.0519884	-0.114119	-0.0384977	-0.0668499	-0.116496	-0.212435	-0.0526806	0.0235326	-0.0062881	-0.0512356			-0.18269	-0.138246	-0.517237	1.56289	-0.402932	0.524887	-0.435416	1.19509	-0.662654	0.736468	0.742653	0.823538	-0.752016	-1.4467	-1.26721	7.14803
INDS7	-0.254619	-0.240032	-0.222437	-0.194598	-0.24491	-0.227396	-0.239015	-0.203279	-0.250686	-0.267481	-0.255746	-0.152103	-0.206133	-0.0827089	-0.00910719	-0.0389216	-0.0920241			-0.0572878	-0.0733046	-0.125155	0.258543	-0.0715094	0.0510964	-0.149513	0.233208	0.0669966	-0.0438737	-0.405258	0.355222	-0.59876	-0.889889	3.27373	1.36434
INDS8	-0.803339	-0.812022	-0.779182	-0.763509	-0.804227	-0.844036	-0.860654	-0.840959	-0.831714	-0.646448	-0.630305	-0.658474	-0.77149	-0.672052	-0.666885	-0.755406	-0.754385			0.0108092	-0.040442	-0.0201148	0.0533291	0.0495001	0.0196886	-0.0228837	-0.0109937	-0.222751	-0.0249723	0.0446912	0.171633	-0.128891	-0.007688	0.132738	-0.00135223
INDS9	-0.32024	-0.299559	-0.303725	-0.248755	-0.356332	-0.282166	-0.311799	-0.239553	-0.279529	-0.188175	-0.168461	-0.249196	-0.360552	-0.0631863	-0.329356	-0.441611	-0.30524			-0.0645792	0.0139075	-0.180988	0.432465	-0.208137	0.105019	-0.231707	0.16688	-0.326814	-0.104767	0.479251	0.446863	-0.824751	4.21245	0.340833	-0.308803
INDS10	-0.209529	-0.180773	-0.175315	-0.12891	-0.226201	-0.154684	-0.187114	-0.11873	-0.169069	-0.0919292	-0.0916228	-0.14135	-0.243212	0.0488625	-0.199533	-0.302218	-0.193682			-0.137244	-0.0301928	-0.264695	0.754723	-0.316165	0.209651	-0.365468	0.423984	-0.456263	-0.00333317	0.542736	0.720639	-1.2009	-5.08356	0.514629	-0.359132
INDS11	-0.329992	-0.28915	-0.285578	-0.267385	-0.362523	-0.529306	-0.55089	-0.435799	-0.400931	-0.285598	-0.276611	-0.297459	-0.379032	-0.284572	-0.494749	-0.592451	-0.562237			-0.123768	-0.012352	-0.0637062	0.355808	0.460063	0.0407769	-0.208917	-0.0800107	-0.287661	-0.0314673	0.0753676	0.274234	-0.249213	0.738568	0.19748	-0.0509996
INDS12	-0.503755	-0.563301	-0.472311	-0.416686	-0.497595	-0.683237	-0.703353	-0.621474	-0.589971	-0.578937	-0.635638	-0.74626	-0.826182	-0.799253	-0.76446	-0.835074	-0.834422			0.118204	-0.16153	-0.117772	0.194173	0.373079	0.0294419	-0.116412	-0.0506912	-0.0187032	0.0979414	0.174033	0.107097	-0.0325954	-0.043532	0.0923715	-0.000780439
INDS13	-0.354871	-0.389329	-0.323208	-0.266091	-0.347246	-0.486253	-0.508302	-0.423651	-0.42285	-0.40177	-0.45464	-0.562245	-0.644945	-0.610892	-0.539918	-0.631429	-0.643082			0.0971022	-0.169834	-0.176719	0.304991	0.400312	0.0453443	-0.166535	-0.00189243	-0.0498524	0.131594	0.236681	0.147089	-0.052799	-0.116181	0.169489	0.0184559
INDS14	-0.341803	-0.375242	-0.309926	-0.264378	-0.341528	-0.463035	-0.48624	-0.405112	-0.405273	-0.387318	-0.445721	-0.505091	-0.601123	-0.551571	-0.552433	-0.646783	-0.646993			0.0978312	-0.174062	-0.146964	0.291817	0.355774	0.0501136	-0.166846	0.000396646	-0.0443029	0.150788	0.133199	0.190128	-0.0824322	0.00156252	0.170792	0.000323395
INDS15	-0.313202	-0.347219	-0.260412	-0.193072	-0.278011	-0.444855	-0.470449	-0.371084	-0.331435	-0.279208	-0.345917	-0.49786	-0.607752	-0.586811	-0.543113	-0.638173	-0.64477			0.108611	-0.250007	-0.25859	0.439933	0.600136	0.0575316	-0.211212	-0.106847	-0.157579	0.238922	0.439248	0.220727	-0.0344562	-0.0744662	0.175028	0.0103371
INDS16	-0.300005	-0.300139	-0.278835	-0.283806	-0.361102	-0.294887	-0.31327	-0.233195	-0.29905	-0.209053	-0.201758	-0.225416	-0.302416	-0.580568	-0.523385	-0.612568	-0.625329			0.000448157	-0.0709814	0.0178286	0.272355	-0.18337	0.0623372	-0.255609	0.282402	-0.300943	-0.0348952	0.117257	0.341592	0.919766	-0.0984942	0.170397	0.0208323
INDS17	-0.448581	-0.461468	-0.417058	-0.396316	-0.474169	-0.649838	-0.666994	-0.586829	-0.580744	-0.546331	-0.663451	-0.72115	-0.804588	-0.691282	-0.590316	-0.70094	-0.668094			0.0287289	-0.096236	-0.0497335	0.19644	0.370477	0.0264011	-0.120189	-0.010368	-0.0592574	0.214376	0.0869675	0.115702	-0.140825	-0.146055	0.187397	-0.0468595
INDS18	0.148103	0.066368	0.207791	0.219701	0.133675	-0.145794	-0.203752	-0.0572968	0.0672547	0.111475	0.100016	-0.0762265	-0.313532	-0.137825	-0.178565	-0.283882	-0.218765			-0.551878	2.13089	0.0573164	-0.391557	-2.09065	0.397535	-0.718791	-2.1738	0.6575	-0.102789	-1.76214	3.11316	-0.560412	0.295596	0.589792	-0.22938
INDS19	-0.156037	-0.14876	-0.143507	-0.124908	-0.148358	-0.145142	-0.156981	-0.14767	-0.16733	-0.186246	-0.216471	-0.171395	-0.208617	-0.239182	-0.175002	-0.204559	-0.191478			-0.0466349	-0.0353126	-0.1296	0.187738	-0.02168	0.0815708	-0.0593148	0.133135	0.113042	0.162287	-0.208233	0.217175	0.14651	-0.26833	0.168895	-0.063949
INDS20	-0.285642	-0.277947	-0.259922	-0.226832	-0.292801	-0.26748	-0.285918	-0.228078	-0.291899	-0.288911	-0.307163	-0.120895	-0.186753	-0.471	-0.395853	-0.452971	-0.37461			-0.0269391	-0.0648498	-0.127309	0.290828	-0.0864779	0.0689313	-0.202293	0.279816	-0.0102355	0.0631766	-0.606413	0.544753	1.52204	-0.159548	0.144291	-0.172995
INDS21	-0.290501	-0.285741	-0.264814	-0.229294	-0.307555	-0.275223	-0.291866	-0.220478	-0.29211	-0.2647	-0.261022	-0.0753731	-0.157716	-0.475982	-0.423972	-0.474153	-0.400301			-0.0163878	-0.0732384	-0.134132	0.341314	-0.105124	0.0604718	-0.244594	0.324896	-0.0938348	-0.013896	-0.711238	1.09247	2.01797	-0.10927	0.11836	-0.155754
INDS22	0.138445	0.125326	0.130892	0.166431	0.0801444	0.0961145	0.0852592	0.144038	0.082805	-0.142206	0.136325	-0.348334	-0.327745	-0.0296499	0.0880773	0.106014	0.033898			-0.0947583	0.0444119	0.271516	-0.518452	0.199266	-0.112941	0.689417	-0.425119	-2.71737	-1.95864	-3.55517	-0.0591065	-0.909534	-3.97057	0.203651	-0.68025
INDS23	-0.385738	-0.416622	-0.370094	-0.353998	-0.455526	-0.432258	-0.449236	-0.361412	-0.421478	-0.434524	-0.470867	-0.5912	-0.627923	-0.218161	-0.17605	-0.258608	-0.226637			0.0800644	-0.111679	-0.0434898	0.286803	-0.0510794	0.0392781	-0.195498	0.1662	0.030953	0.0836371	0.255557	0.0621166	-0.652567	-0.19303	0.468946	-0.123627
INDS24	-0.0960719	-0.144889	-0.0902508	-0.0815383	-0.086296	-0.0984898	-0.0909414	-0.0915102	-0.0913379	-0.0964822	-0.0947387	-0.103921	-0.115917	-0.12449	-0.10678	-0.12149	-0.130821			0.50813	-0.377103	-0.0965366	0.0583495	0.141302	-0.0766412	0.00625454	-0.00188263	0.0563206	-0.0180701	0.0969191	0.115436	0.0739568	-0.14226	0.137763	0.0768003
INDS25	-0.134339	-0.115122	-0.111577	-0.101917	-0.168778	-0.0812087	-0.0985183	-0.10137	-0.128384	-0.132445	-0.138097	-0.184159	-0.221723	-0.281638	-0.276632	-0.369719	-0.352097			-0.143049	-0.0307938	-0.0865786	0.656044	-0.518844	0.21315	0.0289438	0.266492	0.0316353	0.0426745	0.333544	0.203976	0.270223	-0.0177725	0.336499	-0.0476636
INDS26	-0.226558	-0.214056	-0.19857	-0.173664	-0.213307	-0.192752	-0.204718	-0.181406	-0.208797	-0.230919	-0.252538	-0.23489	-0.299848	-0.212158	-0.19124	-0.241338	-0.178844			-0.0551818	-0.0723488	-0.125427	0.228275	-0.096362	0.0620792	-0.113875	0.150994	0.10595	0.0936224	-0.069885	0.27655	-0.292449	-0.0985977	0.261967	-0.258951
INDS27	-0.237312	-0.245738	-0.201685	-0.168269	-0.200749	-0.23571	-0.229859	-0.206505	-0.228655	-0.23526	-0.25461	-0.331018	-0.43642	-0.147085	-0.128731	-0.186547	-0.151326			0.0355064	-0.179266	-0.165684	0.193023	0.174154	-0.0248251	-0.101599	0.107262	0.0288823	0.0822531	0.300095	0.31842	-0.662974	-0.124788	0.44913	-0.188806
INDS28	-0.162735	-0.182946	-0.183907	-0.158786	-0.206178	-0.212128	-0.227398	-0.190007	-0.224239	-0.182409	-0.195578	-0.19655	-0.285992	-0.306078	-0.132013	-0.131923	-0.0877954			0.124199	0.0052478	-0.136592	0.298463	0.0288553	0.0719871	-0.164429	0.180161	-0.186542	0.0721934	0.00496973	0.455063	0.0702322	-0.568697	-0.000681607	-0.334493
INDS29	-0.138923	-0.154843	-0.0823251	-0.0518075	-0.126034	-0.214951	-0.248841	-0.17156	-0.137138	-0.125644	-0.160289	-0.210512	-0.329648	-0.237569	-0.211772	-0.273776	-0.268091			0.114596	-0.468331	-0.370697	1.43274	0.705499	0.157664	-0.310564	-0.200644	-0.083809	0.27574	0.313323	0.565936	-0.279325	-0.108589	0.292789	-0.0207638
INDS30	0.00704688	-0.0658742	-0.000374827	0.0292684	-0.0324841	-0.101752	-0.143164	-0.0744196	-0.0362305	-0.104664	-0.0865308	-0.296294	-0.393238	-0.141827	-0.130301	-0.222104	-0.170877			-10.348	-0.99431	-79.0851	-2.10987	2.13237	0.406985	-0.480178	-0.513159	1.88884	-0.173253	2.42415	0.327189	-0.639336	-0.0812694	0.704548	-0.230644
INDS31				-0.0669767										-0.209387	0.22436	0.202122	0.172582			#DIV/0!	#DIV/0!	#DIV/0!	-1	#DIV/0!	#DIV/0!	#DIV/0!	#DIV/0!	#DIV/0!	#DIV/0!	#DIV/0!	#DIV/0!	#DIV/0!	-2.07151	-0.0991163	-0.14615
INDS32	-0.255564	-0.2483	-0.236243	-0.208371	-0.257072	-0.237985	-0.254443	-0.217636	-0.270609	-0.292122	-0.314166	-0.142	-0.2328	-0.198305	-0.0759608	-0.10556	-0.107027			-0.028422	-0.0485568	-0.117983	0.233725	-0.074247	0.0691516	-0.144657	0.243404	0.0794969	0.0754616	-0.548009	0.639438	-0.148174	-0.616951	0.389668	0.0138981
INDS33	-0.191892	-0.204264	-0.188025	-0.148825	-0.239623	-0.184554	-0.204977	-0.153643	-0.188584	-0.142719	-0.133722	-0.16477	-0.248916	-0.169821	-0.149869	-0.219929	-0.227044			0.0644702	-0.0794975	-0.208485	0.610098	-0.229815	0.11066	-0.250438	0.22742	-0.243209	-0.0630364	0.232182	0.510689	-0.31776	-0.117485	0.467473	0.0323485
INDS34	-0.154125	-0.152905	-0.161354	-0.107639	-0.144449	-0.177102	-0.188986	-0.156707	-0.192709	-0.18251	-0.185824	-0.1442	-0.201955	-0.125026	-0.0631275	-0.065768	-0.123624			-0.00791633	0.0552544	-0.332903	0.341983	0.226051	0.0671016	-0.170802	0.229747	-0.0529242	0.0181581	-0.224002	0.400526	-0.380921	-0.495086	0.0418281	0.879692
INDS35																				#DIV/0!	#DIV/0!	#DIV/0!	#DIV/0!	#DIV/0!	#DIV/0!	#DIV/0!	#DIV/0!	#DIV/0!	#DIV/0!	#DIV/0!	#DIV/0!	#DIV/0!	#DIV/0!	#DIV/0!	#DIV/0!
IRES1	-0.404047	-0.411702	-0.44553	-0.512586	-0.587784	-0.574724	-0.53171	-0.631875	-0.661799	-0.628509	-0.618897	-0.48034	-0.668755	-0.722734	-0.733014	-0.73881	-0.726443			0.0189466	0.0821657	0.150509	0.146702	-0.0222184	-0.074844	0.188384	0.0473572	-0.0503029	-0.0152924	-0.223878	0.392254	0.080716	0.0142237	0.00790581	-0.0167389
IRES2	-0.27883	-0.359174	-0.234484	-0.266574	-0.45092	-0.40699	-0.280288	-0.249611	-0.336936	-0.285957	-0.262094	-0.265732	-0.316624	-0.287019	-0.272004	-0.295663	-0.217982			0.288149	-0.347159	0.136857	0.691536	-0.0974232	-0.311314	-0.109448	0.349842	-0.151301	-0.0834502	0.0138793	0.19152	-0.0935035	-0.0523145	0.0869799	-0.262732
IRES3	-0.606109	-0.574678	-0.673899	-0.74571	-0.778682	-0.783788	-0.767964	-0.818575	-0.841232	-0.836459	-0.829629	-0.593236	-0.711925	-0.780388	-0.79601	-0.807871	-0.814675			-0.0518566	0.172655	0.106561	0.0442156	0.00655644	-0.0201887	0.0659023	0.0276793	-0.00567376	-0.00816583	-0.284938	0.20007	0.0961655	0.0200183	0.0149005	0.00842261
IRES4	-0.276294	-0.251695	-0.217487	-0.180693	-0.195755	-0.152201	-0.129337	-0.168697	-0.187101	-0.166705	-0.153725	-0.114746	-0.16505	-0.138244	-0.113909	-0.109195	-0.143157			-0.0890299	-0.135911	-0.169178	0.083354	-0.22249	-0.150222	0.304318	0.109095	-0.109009	-0.0778635	-0.253562	0.438395	-0.162413	-0.176031	-0.0413775	0.311014
IRES5	-0.118705	-0.119044	-0.0969676	-0.135702	-0.116881	-0.0970453	-0.0817637	-0.103197	-0.117068	-0.1193	-0.152621	-0.0823315	-0.0848009	-0.0729515	-0.0821704	-0.0887532	-0.0973505			0.00285741	-0.185446	0.399453	-0.138693	-0.169707	-0.157469	0.262143	0.134412	0.0190592	0.279308	-0.46055	0.0299933	-0.139732	0.126371	0.0801115	0.0968669
IRES6	-0.282644	-0.285936	-0.210461	-0.240158	-0.298449	-0.187368	-0.183822	-0.201332	-0.213245	-0.224101	-0.228443	-0.239095	-0.28433	-0.343165	-0.35445	-0.389758	-0.346301			0.0116464	-0.263958	0.141104	0.242721	-0.372194	-0.0189273	0.0952557	0.0591689	0.0509097	0.0193774	0.0466298	0.189191	0.206924	0.0328849	0.099614	-0.111499
IRES7	-0.691672	-0.719299	-0.692531	-0.69799	-0.683542	-0.686619	-0.657428	-0.710539	-0.718526	-0.710386	-0.709628	-0.600727	-0.73625	-0.834932	-0.852317	-0.855537	-0.883287			0.0399411	-0.0372138	0.00788348	-0.0206998	0.00450174	-0.0425146	0.0807861	0.0112411	-0.0113285	-0.00106723	-0.153462	0.225597	0.134034	0.0208214	0.00377794	0.0324358
IRES8	-0.0888814	-0.108361	-0.106401	-0.10868	-0.125239	-0.120886	-0.116397	-0.121096	-0.090372	-0.0930544	-0.117406	-0.510499	-0.618967	-0.708524	-0.702841	-0.746347	-0.760254			0.219162	-0.0180864	0.0214193	0.152367	-0.0347559	-0.0371359	0.0403662	-0.253715	0.0296819	0.261694	3.34814	0.212475	0.144686	-0.00801961	0.0618998	0.0186338
IRES9	-0.891909	-0.898159	-0.907984	-0.925628	-0.938184	-0.930082	-0.907927	-0.917329	-0.926941	-0.929551	-0.935431	-0.838896	-0.933121	-0.941765	-0.952914	-0.939121	-0.938883			0.0070064	0.0109392	0.0194324	0.0135653	-0.00863593	-0.0238204	0.0103553	0.0104777	0.00281632	0.00632493	-0.103198	0.112321	0.00926352	0.0118379	-0.0144746	-0.000252943
IRES10	-0.258627	-0.282343	-0.240402	-0.239147	-0.300279	-0.287115	-0.236661	-0.284608	-0.302723	-0.317584	-0.329033	-0.205554	-0.267866	-0.300866	-0.262889	-0.372839	-0.332919			0.0916993	-0.148546	-0.00522302	0.255626	-0.0438402	-0.175725	0.202595	0.063648	0.0490921	0.0360512	-0.37528	0.303143	0.123197	-0.126227	0.41824	-0.107071
IRES11	-0.321266	-0.320609	-0.260039	-0.284948	-0.392171	-0.301139	-0.271846	-0.232713	-0.253795	-0.27156	-0.263225	-0.227762	-0.237511	-0.258617	-0.343807	-0.34127	-0.350866			-0.00204563	-0.18892	0.0957877	0.376291	-0.232122	-0.0972752	-0.143954	0.0905932	0.0699974	-0.030694	-0.134724	0.0428033	0.0888633	0.329408	-0.00737922	0.0281182
IRES12	-0.501933	-0.522137	-0.370262	-0.36169	-0.428389	-0.388782	-0.367456	-0.433152	-0.425137	-0.465812	-0.475444	-0.37749	-0.389818	-0.383813	-0.377483	-0.424142	-0.459661			0.0402536	-0.290872	-0.0231523	0.184408	-0.0924553	-0.0548521	0.178786	-0.0185051	0.0956756	0.0206786	-0.206026	0.0326567	-0.0154036	-0.0164944	0.123608	0.0837425
IRES13	-0.295858	-0.308179	-0.227233	-0.369474	-0.411147	-0.418429	-0.382658	-0.449914	-0.504065	-0.512942	-0.566756	-0.421591	-0.519329	-0.222003	-0.275227	-0.181933	-0.23915			0.0416457	-0.26266	0.625971	0.112792	0.0177102	-0.0854883	0.175759	0.120359	0.0176112	0.104912	-0.256134	0.231833	-0.572519	0.239742	-0.338973	0.314497
IRES14	-0.728452	-0.690241	-0.650016	-0.673075	-0.689645	-0.680456	-0.627885	-0.683701	-0.717926	-0.728453	-0.806044	-0.54082	-0.683768	-0.792265	-0.773735	-0.858609	-0.875151			-0.0524555	-0.0582765	0.0354745	0.0246188	-0.0133244	-0.077259	0.0888955	0.0500581	0.0146639	0.106514	-0.329044	0.264318	0.158675	-0.0233888	0.109694	0.0192664
IRES15	-0.225723	-0.244632	-0.189648	-0.254268	-0.358511	-0.249834	-0.197092	-0.24146	-0.263151	-0.259682	-0.271289	-0.192656	-0.245591	-0.297432	-0.232309	-0.223305	-0.28328			0.0837724	-0.224764	0.34074	0.409973	-0.303135	-0.21111	0.225113	0.0898366	-0.0131839	0.0446962	-0.289849	0.274764	0.211087	-0.21895	-0.0387586	0.268577
IRES16	-0.613554	-0.630049	-0.533288	-0.512634	-0.623781	-0.595248	-0.548692	-0.629313	-0.675181	-0.6257	-0.652129	-0.470042	-0.620759	-0.476696	-0.483177	-0.467878	-0.46869			0.0268843	-0.153577	-0.0387304	0.216816	-0.0457428	-0.0782122	0.146933	0.0728851	-0.0732848	0.0422385	-0.27922	0.320646	-0.232075	0.0135948	-0.0316628	0.00173469
IRES17	-0.549007	-0.577748	-0.436969	-0.516852	-0.590488	-0.596972	-0.453567	-0.434706	-0.440866	-0.441461	-0.45064	-0.476728	-0.499469	-0.637246	-0.635914	-0.657058	-0.526507			0.0523516	-0.243669	0.18281	0.142471	0.010982	-0.240221	-0.0415853	0.0141721	0.00134886	0.0207918	0.0578912	0.0477028	0.275848	-0.00209053	0.0332503	-0.198691
IRES18	-0.562543	-0.641229	-0.601573	-0.593578	-0.596934	-0.623551	-0.632231	-0.664714	-0.640761	-0.69381	-0.579034	-0.540452	-0.514788	-0.506502	-0.628284	-0.518694	-0.636143			0.139875	-0.0618443	-0.0132887	0.00565271	0.0445905	0.0139194	0.0513788	-0.0360358	0.0827911	-0.165428	-0.0666321	-0.0474868	-0.0160948	0.240437	-0.174428	0.226433
IRES19	-0.348563	-0.433625	-0.386169	-0.460702	-0.355337	-0.330423	-0.334736	-0.338236	-0.29592	-0.297997	-0.317234	-0.329221	-0.472309	-0.395688	-0.373089	-0.313142	-0.388146			0.244038	-0.109441	0.193006	-0.228706	-0.0701116	0.0130506	0.0104561	-0.125108	0.00701988	0.0645527	0.0377881	0.434624	-0.162226	-0.0571138	-0.160676	0.239518
IRES20	-0.653613	-0.687052	-0.645217	-0.77074	-0.831524	-0.825767	-0.788133	-0.822461	-0.823018	-0.814722	-0.80202	-0.647547	-0.813861	-0.861299	-0.834854	-0.835168	-0.858735			0.0511598	-0.0608908	0.194544	0.0788639	-0.00692257	-0.0455752	0.0435568	0.000676967	-0.0100798	-0.0155907	-0.192606	0.256838	0.0582876	-0.030704	0.000377038	0.028218
IRES21	-0.52945	-0.620908	-0.636002	-0.687128	-0.664191	-0.648387	-0.667056	-0.64124	-0.635718	-0.643965	-0.610115	-0.477785	-0.694095	-0.766379	-0.739425	-0.729308	-0.772058			0.172742	0.0243092	0.0803865	-0.0333813	-0.0237944	0.0287934	-0.0387006	-0.00861202	0.0129726	-0.0525641	-0.216894	0.452735	0.104141	-0.0351716	-0.0136815	0.058617
IRES22	-0.510266	-0.596418	-0.611817	-0.612558	-0.593969	-0.585537	-0.602361	-0.609382	-0.581509	-0.604537	-0.60885	-0.460188	-0.57769	-0.538864	-0.56119	-0.717235	-0.752615			0.168837	0.0258189	0.00121159	-0.0303464	-0.014196	0.0287327	0.0116552	-0.0457395	0.0396002	0.00713399	-0.244168	0.255334	-0.0672076	0.0414309	0.278061	0.0493277
IRES23	-0.550891	-0.61879	-0.528034	-0.610764	-0.524558	-0.491878	-0.529685	-0.524087	-0.27504	-0.305967	-0.171147	-0.214775	-0.3096	-0.395005	-0.311743	-0.577908	-0.61678			0.123254	-0.146667	0.156676	-0.141145	-0.0622989	0.0768608	-0.0105668	-0.475202	0.112445	-0.440636	0.254914	0.441511	0.275854	-0.210786	0.853794	0.0672638
IRES24	-0.238035	-0.251839	-0.273922	-0.269982	-0.265165	-0.2299	-0.249382	-0.253762	-0.292349	-0.355763	-0.228962	-0.206525	-0.295116	-0.253749	-0.268178	-0.375742	-0.389854			0.05799	0.0876882	-0.014386	-0.0178398	-0.132994	0.0847436	0.0175631	0.15206	0.216909	-0.356419	-0.097994	0.428959	-0.14017	0.0568612	0.401092	0.0375588
IRES25	-0.544229	-0.642344	-0.590066	-0.522447	-0.570889	-0.562979	-0.601748	-0.609067	-0.631317	-0.678898	-0.643088	-0.373989	-0.455341	-0.512518	-0.497347	-0.742366	-0.76895			0.180283	-0.0813861	-0.114597	0.0927223	-0.0138554	0.0688643	0.0121624	0.036532	0.0753672	-0.0527476	-0.418449	0.217525	0.12557	-0.029601	0.492653	0.0358103
IRES26	-0.355802	-0.49411	-0.456824	-0.487175	-0.427825	-0.413519	-0.423511	-0.409954	-0.295801	-0.299723	-0.220354	-0.322466	-0.378845	-0.46516	-0.447874	-0.735144	-0.770868			0.388721	-0.0754618	0.0664394	-0.121825	-0.0334388	0.0241636	-0.0320109	-0.278453	0.0132602	-0.264809	0.463403	0.174836	0.227837	-0.0371613	0.641408	0.048595
IRES27	-0.613631	-0.621607	-0.569735	-0.634223	-0.529245	-0.519852	-0.503953	-0.483278	-0.326375	-0.359063	-0.571604	-0.378014	-0.539127	-0.588511	-0.529939	-0.428529	-0.527576			0.0129995	-0.0834493	0.11319	-0.165522	-0.0177466	-0.0305846	-0.0410258	-0.324664	0.100155	0.591931	-0.338678	0.426209	0.0915996	-0.0995255	-0.191361	0.231133
IRES28	-0.724879	-0.728259	-0.719545	-0.776939	-0.859153	-0.874292	-0.8457	-0.882567	-0.886825	-0.885725	-0.901166	-0.761046	-0.875288	-0.877268	-0.866294	-0.826304	-0.854625			0.00466281	-0.0119656	0.0797645	0.105817	0.0176217	-0.032703	0.043593	0.00482471	-0.00124052	0.0174328	-0.155487	0.150112	0.00226166	-0.0125096	-0.0461621	0.0342743
IRES29	-0.393561	-0.491947	-0.564299	-0.655273	-0.749386	-0.756984	-0.717453	-0.759518	-0.724226	-0.745338	-0.7592	-0.587461	-0.746968	-0.770774	-0.70858	-0.577777	-0.613214			0.249988	0.147073	0.161215	0.143624	0.0101389	-0.052221	0.0586315	-0.0464674	0.0291523	0.0185973	-0.226211	0.27152	0.0318704	-0.0806906	-0.184598	0.0613321
IRES30	-0.879967	-0.889725	-0.895535	-0.896795	-0.927148	-0.932047	-0.931329	-0.939342	-0.946492	-0.949364	-0.941571	-0.86354	-0.936316	-0.948943	-0.962141	-0.958255	-0.961684			0.0110892	0.00652977	0.00140687	0.0338458	0.00528419	-0.000770069	0.00860357	0.00761215	0.00303348	-0.00820785	-0.0828741	0.0842772	0.0134854	0.0139087	-0.0040394	0.00357815
IRES31	-0.436297	-0.443411	-0.451923	-0.690733	-0.706315	-0.701823	-0.709546	-0.70233	-0.51512	-0.594377	-0.526475	-0.417888	-0.556675	-0.587705	-0.503327	-0.353233	-0.495941			0.0163049	0.0191957	0.528431	0.0225585	-0.00635971	0.0110044	-0.0101704	-0.266556	0.153863	-0.114241	-0.206253	0.332115	0.0557427	-0.143573	-0.298203	0.404004
IRES32	-0.434503	-0.505964	-0.536477	-0.569757	-0.578632	-0.554516	-0.552656	-0.547367	-0.29487	-0.313834	-0.334889	-0.283312	-0.399283	-0.416432	-0.378179	-0.365626	-0.388348			0.164468	0.0603063	0.0620347	0.0155754	-0.0416774	-0.00335436	-0.00957026	-0.461294	0.0643133	0.0670898	-0.154013	0.409342	0.0429507	-0.0918601	-0.0331934	0.0621462
IRES33	-0.435216	-0.493131	-0.517839	-0.574154	-0.593736	-0.583909	-0.588958	-0.590182	-0.557987	-0.581843	-0.481578	-0.440668	-0.487374	-0.62791	-0.673874	-0.657825	-0.723406			0.133073	0.0501032	0.10875	0.0341067	-0.0165506	0.00864553	0.00207882	-0.0545501	0.0427529	-0.172324	-0.0849487	0.105989	0.288353	0.0732013	-0.0238169	0.0996948
IRES34	-0.649059	-0.690087	-0.646858	-0.504157	-0.635101	-0.614731	-0.618041	-0.606458	-0.608689	-0.627784	-0.333498	-0.51898	-0.610242	-0.669471	-0.71049	-0.723923	-0.735804			0.0632121	-0.0626434	-0.220606	0.259729	-0.0320731	0.00538359	-0.0187416	0.00367907	0.0313716	-0.46877	0.55617	0.17585	0.097057	0.0612707	0.0189072	0.0164123
IRES35																				#DIV/0!	#DIV/0!	#DIV/0!	#DIV/0!	#DIV/0!	#DIV/0!	#DIV/0!	#DIV/0!	#DIV/0!	#DIV/0!	#DIV/0!	#DIV/0!	#DIV/0!	#DIV/0!	#DIV/0!	#DIV/0!
ITAS1	0.264347	0.246949	0.339938	0.279588	0.199549	0.14809	0.184391	0.237907	0.232771	0.294566	0.4265	0.230287	0.161531	0.340813	0.151541	-0.219204	-0.0213753			-0.0658153	0.376552	-0.177534	-0.286275	-0.257875	0.245129	0.29023	-0.0215882	0.265474	0.447894	-0.460054	-0.298565	1.10989	-0.555356	-2.4465	-0.902487
ITAS2	0.0936778	0.071715	0.135922	0.106012	0.0514964	0.0490408	0.0638922	0.0872239	0.070369	0.0958778	0.0847101	0.0926667	0.0599807	0.086794	0.0630077	-0.0394528	0.00432753			-0.234451	0.895305	-0.220048	-0.514241	-0.0476863	0.302838	0.365174	-0.193237	0.3625	-0.116479	0.093928	-0.352727	0.447034	-0.274055	-1.62616	-1.10969
ITAS3	0.550089	0.524968	0.589281	0.506729	0.424356	0.380566	0.435948	0.483982	0.493969	0.549429	0.684841	0.487869	0.420992	0.577997	0.376104	-0.189636	0.161996			-0.0456672	0.122509	-0.140091	-0.162557	-0.103192	0.145526	0.110182	0.0206355	0.112273	0.246461	-0.287617	-0.137082	0.372941	-0.349298	-1.50421	-1.85424
ITAS4	0.343498	0.295056	0.462377	0.379239	0.303084	0.213493	0.22787	0.270515	0.276628	0.350767	0.405419	0.287666	0.23113	0.114578	0.0957896	-0.264564	-0.238316			-0.141024	0.567079	-0.179804	-0.200809	-0.2956	0.067341	0.187148	0.022596	0.268013	0.155806	-0.290449	-0.196534	-0.504269	-0.163981	-3.76192	-0.0992124
ITAS5	0.168897	0.13176	0.278132	0.225187	0.149915	0.130395	0.116706	0.0339163	-0.0977736	-0.00972978	0.00597573	0.183099	0.135972	0.14787	0.128122	-0.242307	0.0546916			-0.21988	1.1109	-0.19036	-0.334264	-0.13021	-0.104979	-0.709386	-3.88279	-0.900487	-1.61417	29.6404	-0.257384	0.0875069	-0.133555	-2.89123	-1.22571
ITAS6	0.0885706	0.0443869	0.160471	0.0179183	-0.0620955	-0.151789	-0.161454	-0.140632	-0.137168	-0.07853	0.0699341	-0.115045	-0.148082	-0.0376368	-0.0933203	-0.146403	-0.109719			-0.498853	2.61527	-0.888339	-4.46548	1.44444	0.0636749	-0.128964	-0.0246291	-0.427492	-1.89054	-2.64504	0.287173	-0.745838	1.47949	0.56882	-0.250567
ITAS7	0.369208	0.335723	0.396719	0.369082	0.281128	0.261892	0.282721	0.321699	0.315816	0.364529	0.395423	0.314735	0.263987	0.302802	0.251568	-0.0750156	0.150392			-0.0906939	0.181684	-0.069664	-0.238305	-0.0684221	0.0795329	0.137866	-0.0182881	0.154246	0.0847495	-0.204053	-0.161242	0.147033	-0.169199	-1.29819	-3.00481
ITAS8	-0.761667	-0.774092	-0.758836	-0.710447	-0.712201	-0.763046	-0.710696	-0.616286	-0.724838	-0.661613	-0.372295	-0.662541	-0.754025	-0.700513	-0.744178	-0.84855	-0.80047			0.0163127	-0.0197075	-0.0637674	0.00246781	0.0713926	-0.0686072	-0.132842	0.176139	-0.0872261	-0.437291	0.77961	0.138081	-0.0709684	0.0623335	0.140251	-0.0566616
ITAS9	0.390269	0.353832	0.303467	-0.236684	-0.285107	-0.376482	-0.307543	-0.190804	-0.202302	-0.167502	-0.249271	-0.202002	-0.309905	-0.00648081	-0.211984	-0.605361	-0.493943			-0.0933637	-0.142341	-1.77993	0.20459	0.320495	-0.183113	-0.379585	0.0602588	-0.172019	0.488168	-0.189631	0.534168	-0.979088	31.7095	1.85569	-0.184052
ITAS10	0.316381	0.288085	0.283716	-0.0840044	-0.118697	-0.171871	-0.119577	-0.01892	-0.0233187	0.0680609	0.0158078	0.0166076	0.0346628	0.173718	0.0467902	-0.222807	-0.174697			-0.0894348	-0.0151669	-1.29609	0.412987	0.447983	-0.304264	-0.841776	0.23249	-3.91873	-0.76774	0.0505905	1.08717	4.01166	-0.730655	-5.76183	-0.215926
ITAS11	0.197314	0.0670727	0.13793	0.207344	0.177646	0.0291247	0.152339	0.189726	0.193099	0.263201	0.289994	0.197594	0.148866	0.217205	0.211146	-0.137407	0.127047			-0.660071	1.05643	0.503254	-0.14323	-0.836052	4.23056	0.245422	0.0177789	0.363037	0.101797	-0.318629	-0.246604	0.459063	-0.0278956	-1.65076	-1.92461
ITAS12	0.103295	0.124231	0.207548	0.163875	-0.0697623	-0.0286895	-0.0120912	0.00217419	-0.242967	-0.122922	-0.0159982	0.0814788	0.289568	-0.319702	-0.217413	-0.586723	-0.482865			0.202677	0.670665	-0.210421	-1.4257	-0.588754	-0.57855	-1.17982	-112.75	-0.49408	-0.869851	-6.09298	2.55391	-2.10406	-0.319949	1.69865	-0.177014
ITAS13	0.385282	0.401588	0.452508	0.379193	0.22253	0.270002	0.28957	0.296973	0.094834	0.229566	0.327806	0.364752	0.499226	0.00633368	0.0965192	-0.327797	-0.19914			0.0423223	0.126798	-0.16202	-0.413147	0.213328	0.0724726	0.0255651	-0.680665	1.42072	0.427937	0.112705	0.368674	-0.987313	14.239	-4.39618	-0.392489
ITAS14	0.207791	0.214551	0.303709	0.133863	0.022798	0.0662261	0.06339	0.0661898	-0.0975645	0.00262061	-0.0440642	0.0970423	0.183289	-0.133341	-0.0621342	-0.283874	-0.343852			0.0325339	0.415557	-0.559241	-0.829691	1.9049	-0.042824	0.0441687	-2.47401	-1.02686	-17.8145	-3.20229	0.88875	-1.72749	-0.53402	3.56871	0.211286
ITAS15	0.299339	0.308909	0.394222	0.309089	0.134265	0.250404	0.271124	0.279784	0.137019	0.250279	0.346565	0.370729	0.490313	0.0846678	0.0463665	-0.357726	-0.292406			0.0319723	0.276174	-0.215952	-0.565611	0.865002	0.0827462	0.0319385	-0.510266	0.826598	0.384713	0.0697224	0.322565	-0.827319	-0.452371	-8.71518	-0.1826
ITAS16	0.296719	0.254431	0.383207	0.249592	0.164488	0.174889	0.14724	0.145436	0.0530799	0.128465	0.183757	0.167274	0.217122	0.0878841	0.125503	-0.0187334	-0.02261			-0.14252	0.506133	-0.348675	-0.340974	0.0632325	-0.158095	-0.0122488	-0.635029	1.42022	0.430404	-0.0897026	0.298006	-0.595232	0.428053	-1.14927	0.206936
ITAS17	-0.447528	-0.516978	-0.447915	-0.0631008	-0.0666972	-0.160398	-0.0530778	0.0862243	0.116416	0.275951	0.479191	0.0704519	-0.0421803	0.275497	0.170941	-0.320759	-0.0368499			0.155187	-0.13359	-0.859123	0.0569947	1.40486	-0.669086	-2.62449	0.350152	1.37039	0.736509	-0.852977	-1.59871	-7.53143	-0.37952	-2.87644	-0.885117
ITAS18	0.519094	0.526249	0.62273	0.573142	0.465571	0.471387	0.464848	0.463375	0.338237	0.41303	0.477969	0.466113	0.55062	0.290167	0.29271	-0.00988237	0.0962618			0.0137845	0.183338	-0.0796298	-0.187688	0.0124923	-0.0138698	-0.00316923	-0.270059	0.221127	0.157227	-0.0248066	0.181302	-0.473017	0.00876392	-1.03376	-10.7408
ITAS19	0.337426	0.347827	0.45846	0.380311	0.287945	0.268509	0.266598	0.306563	0.300307	0.355677	0.38079	0.331228	0.295526	0.331423	0.296897	0.0982732	0.20612			0.0308252	0.31807	-0.170461	-0.242869	-0.0674985	-0.00711836	0.149908	-0.0204055	0.184376	0.0706082	-0.130155	-0.107787	0.121467	-0.104175	-0.668999	1.09742
ITAS20	0.477942	0.427639	0.643302	0.525613	0.436163	0.415032	0.453665	0.50775	0.513867	0.574604	0.650719	0.510856	0.447386	0.607971	0.532743	0.261377	0.466638			-0.10525	0.504312	-0.182946	-0.170183	-0.0484457	0.0930835	0.119217	0.0120477	0.118196	0.132465	-0.214936	-0.124243	0.358942	-0.123737	-0.509374	0.785306
ITAS21	0.475339	0.381091	0.488481	0.559761	0.482069	0.470934	0.499491	0.537714	0.514947	0.558241	0.570058	0.538409	0.501828	0.538134	0.506824	0.312996	0.446006			-0.198274	0.281796	0.145921	-0.138795	-0.0230984	0.0606403	0.0765233	-0.042341	0.0840744	0.0211691	-0.0555193	-0.0679433	0.0723482	-0.0581827	-0.382436	0.424957
ITAS22	0.504863	0.478187	0.572934	0.531876	0.454515	0.409039	0.453287	0.504755	0.511961	0.578191	0.662684	0.523323	0.469709	0.533573	0.384476	0.0480322	0.272775			-0.0528378	0.198139	-0.0716634	-0.14545	-0.100053	0.108175	0.113546	0.0142749	0.129365	0.146134	-0.210298	-0.102448	0.135965	-0.279431	-0.875071	4.67899
ITAS23	0.246982	0.175115	0.243394	-0.107508	-0.256418	-0.38454	-0.299477	-0.174529	-0.180655	-0.00835714	0.359205	-0.0849825	-0.220787	0.0578416	-0.104643	-0.47427	-0.186262			-0.290982	0.389912	-1.4417	1.38511	0.499659	-0.221207	-0.41722	0.0351006	-0.95374	-43.9818	-1.23658	1.59803	-1.26198	-2.80914	3.53225	-0.607267
ITAS24	0.237983	0.208391	0.25996	-0.176551	-0.379197	-0.414824	-0.405354	-0.342317	-0.325924	-0.199555	0.0310217	-0.351664	-0.395974	-0.0990827	-0.281191	-0.426756	-0.306608			-0.124346	0.24746	-1.67915	1.14781	0.0939528	-0.0228293	-0.155511	-0.0478885	-0.387726	-1.15545	-12.3361	0.126001	-0.749775	1.83794	0.517672	-0.281539
ITAS25	-0.0642916	-0.14678	-0.0835419	-0.320517	-0.366106	-0.374652	-0.345557	-0.259963	-0.219006	-0.045103	0.190424	-0.245755	-0.298732	-0.142702	-0.282161	-0.365791	-0.314745			1.28303	-0.430834	2.8366	0.142235	0.023344	-0.0776589	-0.247698	-0.157551	-0.794056	-5.22199	-2.29057	0.215565	-0.522307	0.977278	0.29639	-0.139549
ITAS26	0.448657	0.409802	0.428605	0.215341	0.0793487	-0.0564755	0.0097452	0.110639	0.126412	0.243227	0.499399	0.174072	0.0686699	0.281642	0.168463	-0.230159	0.0505244			-0.0866044	0.0458848	-0.497578	-0.63152	-1.71174	-1.17256	10.3532	0.142563	0.924077	1.05322	-0.651436	-0.60551	3.1014	-0.401855	-2.36623	-1.21952
ITAS27	0.397724	0.361514	0.503376	0.433381	0.346715	0.287842	0.311998	0.343193	0.331823	0.370734	0.37937	0.339319	0.281168	0.345966	0.307569	0.090879	0.206987			-0.0910439	0.39241	-0.139051	-0.199976	-0.169803	0.0839218	0.0999861	-0.0331311	0.117264	0.0232961	-0.105572	-0.171377	0.23046	-0.110985	-0.704525	1.27761
ITAS28	0.474463	0.442217	0.577431	0.509583	0.423597	0.388423	0.425318	0.469751	0.453399	0.466686	0.525934	0.47314	0.420245	0.47258	0.43899	0.245391	0.385799			-0.0679635	0.305766	-0.117499	-0.168739	-0.0830363	0.0949873	0.10447	-0.0348098	0.0293047	0.126955	-0.100381	-0.111797	0.124536	-0.0710781	-0.44101	0.572179
ITAS29	0.445749	0.412421	0.558948	0.507271	0.429123	0.375474	0.399131	0.443105	0.468555	0.541182	0.548448	0.454566	0.403469	0.451855	0.420204	0.223771	0.344649			-0.0747695	0.355287	-0.0924553	-0.154055	-0.125019	0.063004	0.110175	0.0574364	0.155002	0.0134258	-0.171177	-0.112408	0.119924	-0.0700475	-0.467471	0.540189
ITAS30	0.548562	0.512464	0.634337	0.56992	0.497171	0.461222	0.489757	0.528961	0.522677	0.569698	0.590774	0.533259	0.491074	0.535113	0.50194	0.294334	0.425868			-0.065805	0.237819	-0.10155	-0.127648	-0.0723069	0.0618673	0.0800486	-0.0118798	0.0899603	0.0369948	-0.0973552	-0.079107	0.0896784	-0.0619924	-0.413608	0.446889
ITAS31	0.423007	0.397917	0.475371	0.488485	0.39742	0.360587	0.396086	0.432374	0.393476	0.420522	0.369189	0.500921	0.448963	0.465458	0.426002	0.164763	0.327157			-0.0593127	0.194649	0.0275865	-0.186424	-0.092679	0.0984461	0.0916168	-0.0899625	0.0687349	-0.12207	0.356815	-0.103725	0.0367397	-0.0847678	-0.613234	0.985617
ITAS32	0.22712	0.223644	0.403791	0.385772	0.29716	0.284721	0.315208	0.36249	0.324307	0.369978	0.310464	0.370046	0.321182	0.336903	0.31858	0.108647	0.224496			-0.0153074	0.805511	-0.0446239	-0.229702	-0.0418586	0.107077	0.150002	-0.105335	0.140824	-0.160858	0.191913	-0.132048	0.0489473	-0.0543862	-0.658964	1.06629
ITAS33	0.499498	0.48211	0.575979	0.527878	0.448316	0.431469	0.460514	0.500938	0.489016	0.472137	0.391715	0.500493	0.459037	0.519091	0.477183	0.258239	0.385263			-0.034811	0.194705	-0.0835128	-0.150719	-0.0375783	0.0673167	0.0877801	-0.0238009	-0.0345158	-0.170337	0.277698	-0.08283	0.130825	-0.0807332	-0.458826	0.491883
ITAS34	0.520981	0.487854	0.559501	0.579837	0.514764	0.491458	0.526099	0.566046	0.562945	0.614412	0.643712	0.543191	0.498634	0.528967	0.502035	0.298284	0.420997			-0.0635865	0.146863	0.0363472	-0.112227	-0.0452757	0.0704871	0.0759311	-0.00547881	0.0914245	0.0476877	-0.156158	-0.0820282	0.0608309	-0.0509132	-0.405851	0.411397
ITAS35																				#DIV/0!	#DIV/0!	#DIV/0!	#DIV/0!	#DIV/0!	#DIV/0!	#DIV/0!	#DIV/0!	#DIV/0!	#DIV/0!	#DIV/0!	#DIV/0!	#DIV/0!	#DIV/0!	#DIV/0!	#DIV/0!
JPNS1	0.396406	0.367506	0.45992	0.381979	0.352574	0.333867	0.315228	0.328528	0.238191	0.301721	0.285398	0.306317	0.2372	0.334417	0.199442	0.0504033	0.209557			-0.0729046	0.251463	-0.169466	-0.0769822	-0.0530569	-0.0558271	0.0421913	-0.274977	0.26672	-0.0540994	0.0733001	-0.225642	0.409855	-0.403612	-0.747279	3.1576
JPNS2	-0.45952	-0.374744	-0.407333	-0.378025	-0.543657	-0.499195	-0.559036	-0.550065	-0.532099	-0.416083	-0.458363	-0.19578	-0.242212	-0.233419	-0.090849	-0.0737892	-0.0790981			-0.184487	0.0869624	-0.0719498	0.43815	-0.081784	0.119874	-0.0160463	-0.0326627	-0.218034	0.101615	-0.572871	0.23716	-0.0363028	-0.610789	-0.187783	0.0719474
JPNS3	0.585483	0.552358	0.639881	0.592036	0.539693	0.53538	0.503663	0.511072	0.40477	0.485766	0.472387	0.50288	0.439684	0.516624	0.396033	0.25224	0.413594			-0.0565776	0.158453	-0.0747717	-0.0884116	-0.0079922	-0.0592414	0.0147109	-0.207999	0.200104	-0.0275407	0.0645502	-0.125668	0.174987	-0.233421	-0.363082	0.639682
JPNS4	0.0369967	0.0543754	0.106591	0.0465351	-0.0156685	-0.0241226	-0.0705045	-0.0526092	-0.121585	-0.0626671	-0.0887654	0.0886168	0.0231286	0.0703557	0.0708038	-0.0174194	0.0635267			0.469738	0.960281	-0.563424	-1.3367	0.53956	1.92275	-0.253818	1.31111	-0.484584	0.416459	-1.99833	-0.739004	2.04193	0.00637009	-1.24602	-4.64689
JPNS5	0.0274706	0.0173206	0.0585028	0.0358872	0.00185571	-0.000101868	-0.00941546	-0.0114997	-0.0212796	-0.0073564	0.0130923	0.00671297	0.00417757	0.00558082	0.00176146	-0.00736628	0.000332837			-0.369486	2.37765	-0.386573	-0.948291	-1.05489	91.4283	0.221367	0.850441	-0.654297	-2.77971	-0.487257	-0.377688	0.335902	-0.684373	-5.18192	-1.04518
JPNS6	0.202784	0.128976	0.336015	0.224756	0.208424	0.188227	0.190005	0.192699	0.111593	0.164551	0.153721	0.126548	0.0752481	0.132183	0.0358725	-0.042802	0.0448214			-0.363974	1.60525	-0.331113	-0.072666	-0.0969019	0.00944432	0.0141784	-0.420894	0.47456	-0.0658124	-0.176768	-0.40538	0.756634	-0.728615	-2.19317	-2.04718
JPNS7	0.394834	0.383447	0.397475	0.363713	0.278169	0.266645	0.209367	0.206229	0.0668901	0.173761	0.145054	0.261518	0.179687	0.252843	0.096824	-0.0990056	0.107454			-0.0288388	0.0365838	-0.0849422	-0.235195	-0.0414295	-0.214809	-0.0149904	-0.675651	1.59771	-0.165212	0.802906	-0.312908	0.407131	-0.617059	-2.02253	-2.08533
JPNS8	-0.734851	-0.6296	-0.600677	-0.632051	-0.75084	-0.71852	-0.763243	-0.750326	-0.751709	-0.697787	-0.727278	-0.728994	-0.834905	-0.758432	-0.767486	-0.82252	-0.736384			-0.143228	-0.0459388	0.0522308	0.187943	-0.0430458	0.062244	-0.0169239	0.00184231	-0.0717318	0.0422633	0.00235942	0.145283	-0.0915945	0.0119377	0.0717069	-0.104722
JPNS9	0.0625206	0.0604952	0.238564	0.05813	-0.0702583	-0.111306	-0.229296	-0.186132	-0.29067	-0.180676	-0.21666	-0.312294	-0.458137	-0.356662	-0.274343	-0.42598	-0.269255			-0.0323971	2.94353	-0.756334	-2.20864	0.584234	1.06006	-0.188246	0.561635	-0.378414	0.199161	0.441403	0.467003	-0.221494	-0.230805	0.552729	-0.367916
JPNS10	0.145445	0.148582	0.25404	0.142267	0.0362261	0.00634792	-0.102203	-0.0615811	-0.168879	-0.0649617	-0.106859	-0.179417	-0.28878	-0.219044	-0.159495	-0.229942	-0.119439			0.0215633	0.709771	-0.439984	-0.745364	-0.82477	-17.1003	-0.397463	1.74238	-0.615335	0.644948	0.679011	0.609546	-0.241482	-0.27186	0.441691	-0.480572
JPNS11	0.189873	0.12201	0.206112	0.179849	-0.123524	-0.180866	-0.404106	-0.407928	-0.333066	-0.0552415	-0.0761512	-0.00562503	-0.02881	0.0718142	-0.216025	-0.381231	-0.216301			-0.357412	0.6893	-0.127419	-1.68682	0.464217	1.23429	0.00945746	-0.183519	-0.834142	0.378514	-0.926133	4.12176	-3.49268	-4.0081	0.764757	-0.432625
JPNS12	0.0384368	-0.0377747	0.0840416	-0.0900296	-0.292935	-0.34259	-0.52825	-0.530576	-0.594225	-0.377238	-0.376879	-0.124979	-0.362625	-0.239255	-0.404715	-0.657223	-0.219448			-1.98277	-3.22481	-2.07125	2.25376	0.169508	0.541931	0.00440339	0.119963	-0.365159	-0.000954088	-0.668384	1.90148	-0.340213	0.691561	0.623917	-0.666098
JPNS13	0.185852	0.16219	0.194054	0.106419	-0.0578048	-0.100677	-0.282203	-0.259393	-0.371028	-0.150133	-0.147442	0.0246662	-0.18549	-0.0909927	0.0156741	-0.325741	0.181503			-0.127319	0.196461	-0.451602	-1.54318	0.741669	1.80306	-0.0808293	0.43037	-0.59536	-0.0179214	-1.16729	-8.52002	-0.509447	-1.17226	-21.7821	-1.5572
JPNS14	0.329424	0.302101	0.38358	0.285976	0.105128	0.0818031	-0.132035	-0.166224	-0.222795	0.0277251	-0.0613944	0.11873	0.00987032	-0.0612757	-0.291184	-0.53814	-0.182507			-0.0829423	0.269708	-0.254454	-0.632387	-0.221875	-2.61405	0.258939	0.340333	-1.12444	-3.2144	-2.93389	-0.916867	-7.20808	3.75203	0.848107	-0.660855
JPNS15	0.307424	0.291195	0.312613	0.260399	0.0671245	0.0350649	-0.164332	-0.135258	-0.240519	0.0197249	0.0435488	0.298276	0.0958445	0.15555	0.0327772	-0.302406	0.208964			-0.052792	0.073552	-0.167023	-0.742225	-0.477613	-5.6865	-0.17692	0.778223	-1.08201	1.20781	5.84924	-0.678672	0.622938	-0.789281	-10.2261	-1.691
JPNS16	0.0613911	0.0629374	0.0864107	0.0385424	-0.0606662	-0.0788341	-0.169867	-0.145654	-0.226623	-0.106081	-0.129364	0.0708839	-0.0673873	0.0815336	0.00636876	-0.249575	0.126616			0.025187	0.372962	-0.553962	-2.57401	0.299474	1.15475	-0.142544	0.555899	-0.531907	0.219492	-1.54794	-1.95067	-2.20993	-0.921888	-40.1875	-1.50733
JPNS17	-0.00367786	-0.0852695	0.139205	0.00389255	-0.282665	-0.361066	-0.535052	-0.529616	-0.599212	-0.39306	-0.396719	-0.303779	-0.503053	-0.4277	-0.682388	-0.758085	-0.58608			22.1845	-2.63252	-0.972037	-73.6168	0.277366	0.481868	-0.0101604	0.131408	-0.344038	0.00930942	-0.234273	0.655984	-0.149791	0.595483	0.11093	-0.226894
JPNS18	0.535723	0.49166	0.581005	0.47384	0.353121	0.342231	0.204875	0.218481	0.0658722	0.332151	0.343399	0.526271	0.405031	0.494809	0.320141	-0.0403918	0.458028			-0.0822495	0.181721	-0.184447	-0.254767	-0.0308396	-0.401354	0.0664087	-0.698499	4.04236	0.0338635	0.532536	-0.230376	0.221658	-0.353001	-1.12617	-12.3396
JPNS19	0.255004	0.250221	0.296951	0.247265	0.115857	0.100935	-0.0408034	-0.0216022	-0.131454	0.0499478	0.0409621	0.109512	-0.00936107	0.0440504	-0.0181793	-0.203895	0.0917685			-0.0187563	0.186756	-0.167321	-0.531448	-0.128791	-1.40425	-0.470577	5.08519	-1.37997	-0.179903	1.67349	-1.08548	-5.7057	-1.41269	10.2158	-1.45008
JPNS20	0.560585	0.545639	0.62548	0.599053	0.554079	0.545243	0.500216	0.511834	0.441873	0.481728	0.438078	0.457442	0.372844	0.470232	0.528818	0.393485	0.534321			-0.0266621	0.146327	-0.0422523	-0.0750745	-0.0159474	-0.0825814	0.0232266	-0.136688	0.0901972	-0.0906116	0.0442008	-0.184936	0.261202	0.12459	-0.255917	0.357921
JPNS21	0.378349	0.350205	0.425231	0.380739	0.227511	0.195677	0.0716699	0.0982607	-0.0799118	0.10498	0.0876122	0.374214	0.216146	0.305546	-0.153916	-0.321726	-0.0576345			-0.0743873	0.214236	-0.10463	-0.402448	-0.139926	-0.633733	0.371018	-1.81326	-2.31369	-0.165435	3.27125	-0.422399	0.413607	-1.50374	1.09027	-0.820859
JPNS22	0.569898	0.551424	0.590896	0.562571	0.459433	0.43393	0.349311	0.379013	0.244377	0.375605	0.356541	0.558626	0.505635	0.526146	0.191688	0.000574207	0.232656			-0.0324147	0.071581	-0.0479361	-0.183332	-0.0555098	-0.195006	0.0850299	-0.355228	0.536988	-0.0507562	0.566795	-0.0948594	0.0405644	-0.635676	-0.997004	404.178
JPNS23	0.0647964	0.0183788	0.177775	0.115169	-0.00400464	-0.0349735	-0.122213	-0.080495	-0.181882	-0.157722	-0.207089	-0.284063	-0.405594	-0.301526	-0.174018	-0.342567	-0.150748			-0.716361	8.67283	-0.352164	-1.03477	7.73325	2.49444	-0.341354	1.25955	-0.132835	0.313002	0.371694	0.427832	-0.256582	-0.422874	0.968572	-0.559946
JPNS24	-0.270138	-0.241369	-0.18882	-0.20343	-0.317922	-0.290438	-0.315718	-0.301246	-0.302381	-0.280351	-0.343352	-0.213455	-0.253205	-0.178971	-0.161701	-0.150614	-0.14137			-0.106499	-0.217712	0.0773736	0.562813	-0.0864509	0.0870412	-0.0458372	0.00376729	-0.0728566	0.224723	-0.378319	0.186219	-0.293175	-0.0965002	-0.068565	-0.0613755
JPNS25	-0.173996	-0.127488	0.120504	0.0569316	-0.0308561	-0.0566326	-0.0865462	-0.0897205	-0.0882745	-0.139159	-0.210834	-0.209944	-0.213391	-0.0120562	-0.0661284	-0.156417	-0.0871604			-0.267292	-1.94522	-0.527556	-1.54199	0.835379	0.528205	0.0366768	-0.0161164	0.57644	0.515052	-0.0042186	0.0164175	-0.943502	4.48502	1.36535	-0.442768
JPNS26	0.35601	0.359508	0.387471	0.366549	0.28387	0.279882	0.223639	0.236827	0.135425	0.223289	0.206398	0.268874	0.191806	0.213903	0.0724349	-0.0423452	0.0537126			0.00982598	0.0777803	-0.0539967	-0.225562	-0.0140459	-0.200954	0.0589708	-0.428168	0.648799	-0.0756458	0.302695	-0.286633	0.115203	-0.661365	-1.5846	-2.26845
JPNS27	0.502375	0.478735	0.500177	0.485521	0.418564	0.41016	0.350099	0.363822	0.271351	0.357006	0.338686	0.493164	0.455032	0.501287	0.348097	0.201222	0.379316			-0.047057	0.0447893	-0.0293019	-0.137907	-0.0200785	-0.146434	0.0391971	-0.254165	0.315663	-0.0513166	0.456112	-0.0773221	0.101653	-0.305593	-0.421938	0.885067
JPNS28	0.608251	0.602537	0.621347	0.597783	0.522936	0.527948	0.490169	0.500828	0.41173	0.484267	0.470443	0.539594	0.480157	0.517793	0.327896	0.22769	0.354111			-0.00939388	0.0312183	-0.0379248	-0.125207	0.00958507	-0.0715586	0.0217464	-0.177902	0.176178	-0.0285464	0.146991	-0.110152	0.0783825	-0.366743	-0.305602	0.555233
JPNS29	0.478126	0.4488	0.538985	0.457474	0.354286	0.358526	0.247227	0.277741	0.153063	0.334526	0.331742	0.515967	0.409319	0.48719	0.359679	0.12362	0.467093			-0.0613342	0.200945	-0.151231	-0.225561	0.0119688	-0.310436	0.123427	-0.4489	1.18554	-0.0083223	0.555327	-0.206696	0.190245	-0.261727	-0.656303	2.77844
JPNS30	0.579819	0.568885	0.591096	0.570397	0.487312	0.485578	0.437622	0.452856	0.356601	0.445192	0.431178	0.527426	0.460813	0.485309	0.297791	0.194579	0.33102			-0.0188581	0.039044	-0.0350191	-0.145661	-0.00355861	-0.098761	0.034812	-0.212552	0.248433	-0.0314779	0.223219	-0.126298	0.0531587	-0.386389	-0.346592	0.701211
JPNS31	0.469247	0.460062	0.527008	0.501145	0.377995	0.359976	0.273974	0.284483	0.0998682	0.253686	0.242781	0.350429	0.261123	0.387326	0.271682	0.131105	0.297033			-0.0195739	0.145516	-0.0490754	-0.245737	-0.0476717	-0.23891	0.0383598	-0.648949	1.54021	-0.042988	0.443399	-0.254848	0.483308	-0.298572	-0.51743	1.26561
JPNS32	0.216317	0.213805	0.258129	0.223395	0.121942	0.105663	0.0467304	0.0365875	-0.119667	0.00990312	-0.0205031	0.170649	0.0540047	0.0944814	-0.282726	-0.37713	-0.261089			-0.0116132	0.207312	-0.134563	-0.454141	-0.133501	-0.557739	-0.217053	-4.27072	-1.08276	-3.07037	-9.32311	-0.683534	0.749503	-3.9924	0.333905	-0.307694
JPNS33	0.373602	0.37025	0.502341	0.402316	0.319434	0.302334	0.217497	0.245164	0.0962252	0.207585	0.1819	0.25973	0.120556	0.282871	0.232734	-0.0141907	0.261915			-0.00897223	0.356762	-0.199118	-0.206012	-0.0535325	-0.280606	0.127206	-0.607507	1.15729	-0.123735	0.427877	-0.53584	1.34638	-0.177243	-1.06097	-19.4568
JPNS34	0.333143	0.31585	0.381254	0.333083	0.201823	0.178441	0.0725647	0.0942631	-0.0722153	0.0925741	0.0703469	0.249189	0.131282	0.158546	-0.223572	-0.341679	-0.175979			-0.0519109	0.207075	-0.12635	-0.394077	-0.115853	-0.593341	0.299022	-1.7661	-2.28192	-0.240101	2.54228	-0.473162	0.207677	-2.41014	0.52827	-0.484959
JPNS35	0.483679	0.460614	0.476242	0.450076	0.345391	0.335868	0.272042	0.287839	0.150816	0.250009	0.234456	0.274996	0.194998	0.265297	0.206129	0.137312	0.228358			-0.047686	0.033927	-0.0549419	-0.232594	-0.0275736	-0.190031	0.0580655	-0.476041	0.657713	-0.062209	0.17291	-0.290905	0.360506	-0.223025	-0.333852	0.663055
KORS1	-0.140316	-0.128778	-0.0211683	-0.0484009	-0.121515	-0.122459	-0.0917967	-0.0552657	-0.0819817	-0.0181355	-0.098955	0.0446698	0.0504898	0.0743524	0.0201688	-0.0241822	0.0448706			-0.0822295	-0.835622	1.28648	1.5106	0.00776619	-0.250388	-0.397955	0.483411	-0.778786	4.45642	-1.45141	0.130291	0.472622	-0.728741	-2.19899	-2.85552
KORS2	-0.128845	-0.125318	-0.127367	-0.123301	-0.135715	-0.113614	-0.128444	-0.130792	-0.122214	-0.113822	-0.133711	-0.0755677	-0.0924985	-0.0902182	-0.0964369	-0.106219	-0.0999221			-0.0273732	0.0163464	-0.0319189	0.100681	-0.162849	0.130527	0.0182783	-0.0655819	-0.0686686	0.17474	-0.434843	0.224048	-0.0246529	0.0689294	0.101436	-0.0592824
KORS3	0.268181	-0.0334725	0.329302	0.307288	0.270728	0.25387	0.280471	0.306441	0.286095	0.323252	0.270317	0.203068	0.206501	0.234393	0.178995	0.121505	0.204665			-1.12481	-10.838	-0.0668501	-0.118975	-0.0622686	0.10478	0.0925933	-0.0663939	0.129877	-0.163759	-0.248778	0.0169065	0.135069	-0.236347	-0.321183	0.684423
KORS4	-0.392476	-0.397798	-0.385325	-0.384172	-0.461521	-0.44406	-0.451277	-0.408179	-0.420195	-0.371627	-0.415423	-0.19677	-0.251659	-0.171587	-0.263227	-0.393699	-0.320907			0.0135598	-0.0313542	-0.00299298	0.201338	-0.037833	0.0162522	-0.0955023	0.0294389	-0.115584	0.117848	-0.526337	0.278944	-0.318175	0.534074	0.495661	-0.184891
KORS5	-0.0719148	-0.16088	-0.0636565	-0.058326	-0.0593624	-0.0686166	-0.0641055	-0.0687547	-0.0717625	-0.0478585	-0.0870223	-0.146084	-0.174342	-0.146682	-0.155686	-0.189425	-0.189208			1.23709	-0.604323	-0.0837383	0.0177693	0.155892	-0.0657428	0.072524	0.0437471	-0.333099	0.818324	0.678699	0.193437	-0.158658	0.0613895	0.21671	-0.00114356
KORS6	-0.124071	-0.127117	-0.108671	-0.103615	-0.123161	-0.127265	-0.124155	-0.114639	-0.125842	-0.0985594	-0.140697	-0.0819163	-0.0729407	-0.091257	-0.0793301	-0.0898239	-0.0841542			0.0245518	-0.14511	-0.0465251	0.188639	0.0333184	-0.024433	-0.076653	0.0977269	-0.2168	0.427536	-0.417783	-0.109571	0.251112	-0.130696	0.13228	-0.0631201
KORS7	-0.237832	-0.28129	-0.275233	-0.292435	-0.355541	-0.32876	-0.331478	-0.297856	-0.312589	-0.292246	-0.257068	-0.25147	-0.119788	-0.159065	-0.170229	-0.18396	-0.12343			0.182724	-0.0215321	0.0625002	0.215792	-0.0753249	0.00826821	-0.101429	0.049463	-0.0650792	-0.120372	-0.0217774	-0.523649	0.327889	0.0701859	0.0806613	-0.329037
KORS8	-0.801469	-0.774502	-0.767961	-0.779505	-0.856296	-0.815564	-0.830767	-0.818975	-0.801114	-0.773554	-0.752471	-0.656818	-0.769474	-0.700413	-0.755018	-0.829791	-0.774618			-0.0336477	-0.00844547	0.0150324	0.0985124	-0.0475678	0.0186409	-0.0141939	-0.0218085	-0.0344029	-0.0272546	-0.127118	0.171518	-0.0897513	0.077962	0.0990344	-0.0664907
KORS9	-0.5342	-0.559536	-0.550584	-0.557796	-0.637137	-0.614354	-0.631175	-0.582791	-0.598284	-0.536137	-0.545447	-0.0619122	-0.19619	0.019268	-0.13663	-0.255693	-0.244139			0.0474282	-0.0159994	0.0130982	0.142241	-0.0357585	0.0273798	-0.0766577	0.0265844	-0.103876	0.0173661	-0.886493	2.16885	-1.09821	-8.09106	0.871422	-0.0451874
KORS10	-0.397204	-0.405726	-0.398949	-0.395452	-0.456252	-0.431305	-0.446358	-0.412714	-0.428031	-0.379131	-0.422125	-0.11078	-0.0984809	-0.111404	-0.181528	-0.28356	-0.167621			0.0214536	-0.0167028	-0.0087649	0.153749	-0.0546794	0.0349005	-0.0753745	0.0371145	-0.114243	0.1134	-0.737565	-0.111024	0.131223	0.629458	0.562072	-0.408868
KORS11	-0.229778	-0.21561	-0.216772	-0.211882	-0.229029	-0.20937	-0.218878	-0.221313	-0.223746	-0.210133	-0.241568	-0.0373296	-0.0441136	-0.237672	-0.187922	-0.35815	-0.346265			-0.0616577	0.00538601	-0.0225581	0.0809298	-0.0858365	0.0454109	0.0111258	0.0109951	-0.0608413	0.149594	-0.84547	0.181734	4.38773	-0.209322	0.905843	-0.0331865
KORS12	-0.532622	-0.643924	-0.653496	-0.631707	-0.709293	-0.684546	-0.68393	-0.65655	-0.674324	-0.587293	-0.624697	-0.487454	-0.564082	-0.444054	-0.576959	-0.738167	-0.600455			0.208971	0.014865	-0.0333425	0.122819	-0.0348897	-0.000898671	-0.0400334	0.0270715	-0.129065	0.0636888	-0.219695	0.1572	-0.212785	0.2993	0.27941	-0.186559
KORS13	-0.193733	-0.377737	-0.347338	-0.32373	-0.433301	-0.438365	-0.431782	-0.375986	-0.436473	-0.312874	-0.359646	-0.272798	-0.350914	-0.236118	-0.383008	-0.582867	-0.451361			0.949787	-0.0804768	-0.0679681	0.338463	0.0116872	-0.0150175	-0.129223	0.160874	-0.283175	0.149489	-0.241481	0.286352	-0.327136	0.622104	0.521816	-0.22562
KORS14	0.0148977	-0.179994	-0.201039	-0.410529	-0.467677	-0.496375	-0.575425	-0.581831	-0.58761	-0.564323	-0.56012	-0.556445	-0.54362	-0.513322	-0.667586	-0.716012	-0.652459			-13.082	0.116923	1.04203	0.139206	0.0613642	0.159255	0.0111327	0.00993168	-0.0396299	-0.00744851	-0.00656041	-0.0230481	-0.0557335	0.30052	0.072539	-0.0887597
KORS15	0.0334834	-0.220443	-0.210139	-0.177677	-0.305177	-0.304966	-0.299642	-0.244484	-0.333337	-0.240861	-0.313088	-0.249059	-0.257332	-0.19998	-0.354783	-0.562857	-0.350411			-7.58363	-0.0467412	-0.154476	0.717589	-0.000691004	-0.017456	-0.184079	0.363428	-0.277426	0.29987	-0.204508	0.033217	-0.22287	0.774091	0.586482	-0.377442
KORS16	-0.224767	-0.235449	-0.218307	-0.258282	-0.320888	-0.29591	-0.294962	-0.268255	-0.289701	-0.251403	-0.285941	-0.25686	-0.301799	-0.260697	-0.297574	-0.3787	-0.345013			0.0475268	-0.0728056	0.183112	0.242395	-0.0778423	-0.00320113	-0.090544	0.0799443	-0.132199	0.137382	-0.101702	0.174956	-0.136192	0.141457	0.272623	-0.0889525
KORS17	-0.697437	-0.65503	-0.667738	-0.654699	-0.742868	-0.692422	-0.722617	-0.739289	-0.719003	-0.67667	-0.695876	-0.518188	-0.536673	-0.567133	-0.66061	-0.591167	-0.64275			-0.0608039	0.0194013	-0.0195268	0.13467	-0.0679061	0.043608	0.0230709	-0.0274402	-0.0588775	0.0283835	-0.255344	0.0356718	0.0567584	0.164822	-0.10512	0.0872566
KORS18	0.0955381	-0.193572	-0.170607	-0.183926	-0.352953	-0.363007	-0.336697	-0.261349	-0.327188	-0.186309	-0.213851	0.120793	-0.0144352	0.177414	-0.0868656	-0.367495	-0.164767			-3.02612	-0.118639	0.0780695	0.919	0.0284843	-0.0724779	-0.223787	0.251923	-0.430575	0.147832	-1.56484	-1.1195	-13.2903	-1.48962	3.23061	-0.551647
KORS19	-0.0490642	-0.0403068	-0.0490317	-0.0672951	-0.0760748	-0.0792953	-0.0887446	-0.0824208	-0.0663004	-0.052105	-0.0725091	-0.0821475	-0.100173	-0.0939782	-0.109141	-0.127044	-0.107027			-0.178488	0.216461	0.372482	0.130465	0.0423332	0.119167	-0.071258	-0.195587	-0.214108	0.391596	0.132927	0.219428	-0.0618403	0.161346	0.16403	-0.157555
KORS20	0.0845482	-0.00765479	0.0501497	0.00279709	0.0171453	-0.0513475	-0.0827552	-0.0870642	-0.0725526	-0.0583659	-0.0600132	-0.00762876	0.00836144	0.0250174	-0.129429	-0.118007	0.0486478			-1.09054	-7.55142	-0.944225	5.12968	-3.99484	0.61167	0.0520687	-0.166677	-0.195536	0.0282225	-0.872882	-2.09604	1.99199	-6.17356	-0.0882488	-1.41225
KORS21	0.128728	0.00939848	0.114413	0.0634079	0.0834523	0.0120897	-0.0275798	-0.0347211	-0.0223288	-0.00609316	-0.0492615	-0.119812	-0.0996507	-0.119583	-0.220027	-0.225882	-0.14231			-0.92699	11.1736	-0.445798	0.316117	-0.85513	-3.28126	0.258929	-0.356908	-0.727117	7.08472	1.43216	-0.168272	0.200019	0.839959	0.0266099	-0.369979
KORS22	0.182407	-0.104253	0.225075	0.21403	0.188735	0.184925	0.202878	0.231305	0.230403	0.239835	0.18752	0.397679	0.412016	0.35712	0.302827	0.307138	0.401608			-1.57154	-3.15893	-0.0490725	-0.118183	-0.0201869	0.0970797	0.140119	-0.00389806	0.0409354	-0.218129	1.12073	0.036052	-0.133238	-0.152029	0.0142346	0.307582
KORS23	-0.467386	-0.488773	-0.486018	-0.497226	-0.602754	-0.548034	-0.564186	-0.529583	-0.522299	-0.486567	-0.530983	-0.088504	-0.0867099	-0.0842713	-0.139876	-0.147092	-0.147258			0.045759	-0.00563685	0.023061	0.212233	-0.0907825	0.0294725	-0.061333	-0.0137535	-0.0684132	0.0912853	-0.833321	-0.0202723	-0.0281237	0.659828	0.0515903	0.00112881
KORS24	-0.349218	-0.334996	-0.319513	-0.330594	-0.41767	-0.364356	-0.372092	-0.356481	-0.358537	-0.340968	-0.369578	-0.170996	-0.156843	-0.160493	-0.244752	-0.239648	-0.146484			-0.0407249	-0.0462167	0.0346813	0.263392	-0.127648	0.0212324	-0.0419549	0.00576973	-0.0490036	0.0839093	-0.537321	-0.082766	0.0232669	0.525002	-0.0208506	-0.388753
KORS25	-0.322741	-0.336687	-0.329852	-0.34343	-0.430536	-0.373588	-0.383411	-0.362798	-0.351774	-0.332473	-0.334345	-0.163232	-0.156553	-0.161804	-0.221888	-0.215676	-0.153254			0.0432096	-0.0202997	0.0411652	0.253634	-0.132273	0.0262928	-0.0537619	-0.0303857	-0.0548689	0.00563294	-0.511786	-0.0409154	0.0335373	0.37134	-0.0279984	-0.289425
KORS26	0.0360003	-0.00762448	-0.05609	-0.10869	-0.105261	-0.139213	-0.165628	-0.168742	-0.153202	-0.153699	-0.199233	-0.146987	-0.140699	-0.146145	-0.22477	-0.230177	-0.14762			-1.21179	6.35657	0.937785	-0.0315543	0.322556	0.189743	0.0188013	-0.0920939	0.00324131	0.29626	-0.262237	-0.0427791	0.0387075	0.537993	0.0240555	-0.358666
KORS27	0.0231849	-0.0344202	-0.0720419	-0.116009	-0.112232	-0.138026	-0.15719	-0.158994	-0.146646	-0.146482	-0.201523	-0.166946	-0.149392	-0.150601	-0.243521	-0.239308	-0.133198			-2.48459	1.09301	0.610305	-0.0325592	0.229822	0.138843	0.0114797	-0.0776647	-0.00111508	0.375748	-0.171576	-0.105152	0.00809482	0.616994	-0.0172975	-0.443406
KORS28	0.150057	0.0879642	0.051912	-0.0380639	-0.0224811	-0.0641422	-0.106383	-0.116078	-0.0914661	-0.10182	-0.161309	-0.10513	-0.0805204	-0.0728898	-0.202394	-0.191679	-0.0498224			-0.413794	-0.409851	-1.73324	-0.409384	1.85316	0.658552	0.091127	-0.212026	0.113197	0.584255	-0.348266	-0.23409	-0.094766	1.77672	-0.0529446	-0.740073
KORS29	0.147369	0.0643199	0.12281	0.115173	0.135268	0.0890451	0.061676	0.0486177	0.0610837	0.0724519	0.0140323	0.0657492	0.0907031	0.0838528	-0.0752585	-0.061136	0.0911191			-0.563545	0.909366	-0.062188	0.174475	-0.341712	-0.307363	-0.211724	0.256408	0.186108	-0.806323	3.68557	0.379532	-0.0755244	-1.89751	-0.187653	-2.49043
KORS30	0.125997	0.000985339	-0.054725	-0.168654	-0.160601	-0.205869	-0.245989	-0.250699	-0.220414	-0.229887	-0.315578	-0.172027	-0.138286	-0.134182	-0.298201	-0.286515	-0.0990701			-0.99218	-56.5393	2.08185	-0.0477511	0.281867	0.19488	0.019148	-0.120801	0.0429781	0.372749	-0.454883	-0.196135	-0.0296827	1.22237	-0.0391904	-0.654223
KORS31	-0.0436152	0.0307501	0.00265192	-0.00848928	-0.0323092	-0.0489397	-0.0746363	-0.111878	-0.162719	-0.154443	-0.221316	-0.143734	-0.126289	-0.122377	-0.221719	-0.214308	-0.10078			-1.70503	-0.913759	-4.20118	2.80588	0.514732	0.525066	0.498974	0.454438	-0.0508617	0.432996	-0.350549	-0.121373	-0.0309717	0.811769	-0.0334258	-0.529744
KORS32	-0.293791	-0.277745	-0.280146	-0.276307	-0.350255	-0.32092	-0.357511	-0.390499	-0.405224	-0.365848	-0.409309	0.00343089	0.0155056	-0.0588301	-0.156381	-0.111538	0.0256062			-0.0546144	0.0086436	-0.0137033	0.26763	-0.0837546	0.11402	0.0922707	0.0377081	-0.0971699	0.118795	-1.00838	3.51943	-4.79411	1.65818	-0.286757	-1.22957
KORS33	-0.386708	-0.422533	-0.404894	-0.416986	-0.503303	-0.483244	-0.499316	-0.439142	-0.468393	-0.407366	-0.449547	0.0861786	0.00292491	0.139527	0.0322999	-0.0101579	0.0305347			0.0926391	-0.0417453	0.0298644	0.207003	-0.039854	0.0332581	-0.120512	0.0666078	-0.13029	0.103546	-1.1917	-0.96606	46.7029	-0.768503	-1.31449	-4.006
KORS34	0.0869302	-0.00632749	0.00117421	-0.0335172	-0.154759	-0.189113	-0.228564	-0.252432	-0.31606	-0.264211	-0.291515	-0.101827	-0.112224	-0.0951626	-0.18976	-0.273995	-0.182773			-1.07279	-1.18557	-29.5444	3.6173	0.221983	0.208609	0.104426	0.25206	-0.164047	0.10334	-0.650698	0.102112	-0.152031	0.994065	0.443901	-0.332935
KORS35																				#DIV/0!	#DIV/0!	#DIV/0!	#DIV/0!	#DIV/0!	#DIV/0!	#DIV/0!	#DIV/0!	#DIV/0!	#DIV/0!	#DIV/0!	#DIV/0!	#DIV/0!	#DIV/0!	#DIV/0!	#DIV/0!
LTUS1	-0.335024	-0.288013	-0.175564	-0.324533	-0.311166	-0.288639	-0.441529	-0.503577	-0.529348	-0.515263	-0.627057	-0.458596	-0.503553	-0.609881	-0.534865	-0.584134	-0.628414			-0.140322	-0.39043	0.848517	-0.0411879	-0.0723973	0.529694	0.140529	0.0511756	-0.0266085	0.216967	-0.268653	0.0980306	0.211157	-0.123001	0.0921135	0.0758051
LTUS2	-0.197082	-0.191568	-0.178825	-0.189912	-0.189054	-0.175125	-0.195853	-0.181219	-0.2156	-0.184583	-0.231401	-0.207683	-0.214447	-0.153401	-0.219522	-0.254584	-0.0745451			-0.0279793	-0.0665205	0.0620035	-0.00451804	-0.0736803	0.118364	-0.0747216	0.189721	-0.143862	0.25364	-0.102499	0.0325705	-0.284667	0.431033	0.159722	-0.707189
LTUS3	0.0643915	0.056716	0.113586	0.027019	-0.0156826	0.0813413	-0.0822987	-0.165132	-0.363983	-0.432142	-0.536913	-0.188788	-0.154892	-0.256988	-0.281977	-0.557956	-0.445829			-0.119201	1.00272	-0.762128	-1.58043	-6.18672	-2.01177	1.0065	1.20419	0.187259	0.242445	-0.648382	-0.179546	0.659146	0.0972359	0.978728	-0.200959
LTUS4	-0.179461	-0.195978	-0.19283	-0.277264	-0.232252	-0.234188	-0.237235	-0.24322	-0.278642	-0.225035	-0.270663	-0.189101	-0.301552	-0.29743	-0.297425	-0.355431	-0.326265			0.0920378	-0.0160601	0.437867	-0.162346	0.00833667	0.0130107	0.0252283	0.145636	-0.192387	0.20276	-0.301339	0.594659	-0.0136693	-1.58957e-05	0.195025	-0.0820582
LTUS5	-0.114571	-0.123927	-0.0765461	-0.141464	-0.152072	-0.139589	-0.232893	-0.270763	-0.313264	-0.211331	-0.221139	-0.155204	-0.148793	-0.130412	-0.0837328	-0.126666	-0.0971582			0.0816662	-0.382331	0.848083	0.0749892	-0.0820843	0.668421	0.162604	0.156967	-0.32539	0.0464121	-0.29816	-0.0413103	-0.123532	-0.357937	0.512736	-0.232955
LTUS6	-0.250628	-0.251738	-0.211742	-0.263483	-0.261418	-0.258872	-0.32677	-0.345494	-0.360203	-0.378324	-0.461501	-0.546656	-0.451995	-0.538277	-0.643437	-0.62214	-0.644246			0.00442956	-0.15888	0.244358	-0.007835	-0.00973992	0.262283	0.0573008	0.0425737	0.0503071	0.219856	0.184518	-0.173163	0.19089	0.195365	-0.0330984	0.0355311
LTUS7	-0.174965	-0.217679	-0.217492	-0.438003	-0.402322	-0.385604	-0.401697	-0.390185	-0.397435	-0.39839	-0.437392	-0.447649	-0.502757	-0.243325	-0.464432	-0.532954	-0.507627			0.244128	-0.000859677	1.01389	-0.081463	-0.0415548	0.0417364	-0.02866	0.0185818	0.00240322	0.0978998	0.0234482	0.123106	-0.516018	0.908688	0.147541	-0.0475236
LTUS8	-0.918483	-0.915102	-0.938224	-0.937711	-0.938741	-0.940129	-0.943505	-0.911236	-0.963996	-0.926942	-0.912321	-0.931314	-0.937151	-0.910584	-0.878876	-0.888159	-0.919831			-0.00368035	0.0252666	-0.000546807	0.00109815	0.00147928	0.00359066	-0.0342017	0.0579003	-0.0384379	-0.0157734	0.0208183	0.00626705	-0.0283485	-0.0348215	0.0105617	0.0356603
LTUS9	-0.727666	-0.717945	-0.61857	-0.669726	-0.734235	-0.739716	-0.748544	-0.805696	-0.83797	-0.775083	-0.698595	-0.702409	-0.784569	-0.669089	-0.770389	-0.735128	-0.791005			-0.0133594	-0.138416	0.0827008	0.0963206	0.00746567	0.0119332	0.076351	0.0400574	-0.0750461	-0.0986844	0.00545922	0.116969	-0.147188	0.151399	-0.0457704	0.0760099
LTUS10	-0.571255	-0.52612	-0.427776	-0.495441	-0.523215	-0.488011	-0.481997	-0.517052	-0.555439	-0.521985	-0.470821	-0.557376	-0.394645	-0.332397	-0.521286	-0.579292	-0.567842			-0.0790099	-0.186923	0.158179	0.0560583	-0.0672834	-0.0123238	0.0727281	0.0742418	-0.0602297	-0.0980183	0.183838	-0.291959	-0.15773	0.568261	0.111276	-0.0197661
LTUS11	-0.166056	-0.214845	-0.203899	-0.2182	-0.20567	-0.206672	-0.27	-0.28042	-0.263241	-0.270828	-0.439098	-0.22675	-0.275999	-0.299364	-0.215215	-0.227223	-0.270167			0.29381	-0.0509463	0.0701363	-0.0574241	0.00487139	0.306421	0.0385898	-0.0612617	0.0288232	0.621317	-0.4836	0.217193	0.0846563	-0.281092	0.0557942	0.188997
LTUS12	-0.17848	-0.223435	-0.257626	-0.30581	-0.254103	-0.259751	-0.281449	-0.26217	-0.348133	-0.254963	-0.298983	-0.441255	-0.524608	-0.350267	-0.566108	-0.615306	-0.658388			0.251876	0.153025	0.187029	-0.16908	0.0222245	0.0835352	-0.0684994	0.327888	-0.267625	0.172652	0.47585	0.188901	-0.332327	0.616219	0.0869067	0.0700165
LTUS13	-0.0569226	-0.168505	-0.0570508	-0.148641	-0.0825924	-0.0923002	-0.0975498	-0.0754787	-0.129433	-0.114175	-0.127742	-0.2137	-0.244504	-0.186815	-0.104485	-0.433198	-0.461154			1.96024	-0.661429	1.60542	-0.444351	0.117538	0.0568758	-0.226255	0.714829	-0.117885	0.118824	0.672905	0.144146	-0.235943	-0.4407	3.14602	0.0645339
LTUS14	-0.340008	-0.510968	-0.328391	-0.411467	-0.377172	-0.347439	-0.341174	-0.277597	-0.318011	-0.177669	-0.271252	-0.366709	-0.411363	-0.295844	-0.300436	-0.426503	-0.531611			0.502811	-0.357315	0.252977	-0.0833464	-0.0788338	-0.0180314	-0.186348	0.145587	-0.441314	0.526732	0.351913	0.121767	-0.28082	0.0155232	0.419614	0.246441
LTUS15	-0.0285929	-0.0913897	-0.087113	-0.10107	-0.0697628	-0.168726	-0.162335	-0.104286	-0.166575	-0.20302	-0.225388	-0.318158	-0.295455	-0.159745	-0.156544	-0.340717	-0.50399			2.19623	-0.0467973	0.160218	-0.309758	1.41857	-0.0378828	-0.357584	0.597288	0.218788	0.110175	0.411603	-0.0713584	-0.459326	-0.0200393	1.1765	0.479203
LTUS16	-0.0649297	-0.131269	-0.0992752	-0.146797	-0.102775	-0.0943507	-0.228118	-0.249576	-0.212412	-0.262927	-0.250582	-0.423813	-0.250827	-0.231099	-0.482677	-0.503321	-0.311089			1.02171	-0.243728	0.478692	-0.299889	-0.081964	1.41776	0.0940674	-0.148907	0.237814	-0.046952	0.691316	-0.408166	-0.0786518	1.08862	0.0427688	-0.381927
LTUS17	-0.764056	-0.727859	-0.768317	-0.804519	-0.76705	-0.753696	-0.774771	-0.756922	-0.719992	-0.742411	-0.810424	-0.658162	-0.692204	-0.614307	-0.673651	-0.700021	-0.437049			-0.0473747	0.0555851	0.0471188	-0.0465732	-0.0174093	0.0279618	-0.0230377	-0.0487899	0.0311374	0.0916114	-0.187879	0.0517225	-0.112535	0.0966035	0.0391453	-0.375664
LTUS18	0.0478713	-0.0441506	-0.176425	-0.278463	-0.172275	-0.20063	-0.247508	-0.199907	-0.313835	-0.521963	-0.51805	-0.423275	-0.558116	-0.453792	-0.332658	-0.397416	0.167017			-1.92228	2.99599	0.578364	-0.381337	0.164595	0.233655	-0.192322	0.569904	0.663178	-0.0074968	-0.182945	0.318565	-0.186923	-0.266936	0.194666	-1.42026
LTUS19	-0.0782708	-0.112216	-0.154516	-0.164065	-0.141983	-0.141167	-0.177368	-0.133695	-0.148388	-0.176458	-0.212254	-0.294377	-0.240337	-0.188187	-0.0716345	-0.127116	-0.177469			0.433689	0.376949	0.0618047	-0.134597	-0.00574728	0.256441	-0.246228	0.109899	0.189166	0.202861	0.386908	-0.183572	-0.216987	-0.619345	0.774513	0.396115
LTUS20	-0.0705514	-0.065144	-0.0397559	-0.0776783	-0.00476335	-0.050972	-0.235432	-0.266233	-0.17668	-0.229165	-0.197449	-0.108788	-0.0881044	-0.185127	-0.140969	-0.224193	-0.253419			-0.0766435	-0.389724	0.953884	-0.938679	9.70087	3.61886	0.130827	-0.336372	0.297065	-0.138399	-0.449034	-0.190126	1.10123	-0.238531	0.590372	0.130364
LTUS21	0.0886377	0.0555126	0.00998673	-0.111264	-0.00618095	-0.0290323	-0.0927901	-0.0632549	-0.0387045	0.00609229	-0.0194703	-0.237233	-0.097945	0.0248337	0.127697	0.100687	0.0938693			-0.373714	-0.8201	-12.1412	-0.944448	3.69706	2.1961	-0.318302	-0.388118	-1.15741	-4.19589	11.1844	-0.587136	-1.25355	4.14209	-0.211521	-0.0677072
LTUS22	-0.182601	-0.221189	-0.201556	-0.218482	-0.205308	-0.206609	-0.26983	-0.280559	-0.272307	-0.28183	-0.333615	-0.233672	-0.271201	-0.221488	-0.245936	-0.455036	-0.313047			0.211327	-0.0887649	0.0839793	-0.0602962	0.00633616	0.305993	0.0397616	-0.029413	0.0349721	0.183744	-0.299575	0.160604	-0.183308	0.110381	0.850225	-0.31204
LTUS23	-0.573477	-0.560066	-0.579036	-0.56925	-0.537654	-0.52594	-0.638466	-0.651279	-0.654091	-0.647668	-0.553275	-0.53142	-0.55766	-0.647541	-0.610861	-0.642909	-0.684186			-0.0233854	0.0338714	-0.0169011	-0.0555055	-0.0217862	0.213951	0.0200693	0.00431739	-0.00982	-0.145742	-0.0395018	0.049376	0.161176	-0.0566449	0.0524642	0.0642038
LTUS24	-0.347828	-0.300735	-0.320742	-0.329682	-0.279483	-0.249328	-0.29781	-0.312692	-0.271355	-0.305853	-0.266443	-0.146648	-0.169185	-0.280602	-0.196234	-0.217846	-0.273516			-0.135392	0.0665291	0.027871	-0.152264	-0.107896	0.19445	0.0499737	-0.132198	0.127132	-0.128852	-0.449608	0.153678	0.658551	-0.300666	0.110135	0.255543
LTUS25	-0.188115	-0.254164	-0.226341	-0.239485	-0.192886	-0.218843	-0.236154	-0.246747	-0.227702	-0.253894	-0.282902	-0.234886	-0.304946	-0.330104	-0.48342	-0.511648	-0.620973			0.35111	-0.109468	0.0580722	-0.19458	0.134573	0.0791026	0.0448536	-0.0771847	0.115031	0.11425	-0.169727	0.298272	0.0825028	0.464447	0.0583912	0.213673
LTUS26	-0.259137	-0.268885	-0.362731	-0.431836	-0.328009	-0.313902	-0.371411	-0.389704	-0.33094	-0.36273	-0.513879	-0.254327	-0.278672	-0.240339	-0.172307	-0.243551	-0.312121			0.037617	0.349019	0.190512	-0.240432	-0.0430067	0.183208	0.0492523	-0.150792	0.0960586	0.416699	-0.505084	0.0957215	-0.137555	-0.283068	0.413474	0.281543
LTUS27	-0.184638	-0.220748	-0.255649	-0.295715	-0.244793	-0.2468	-0.258546	-0.244171	-0.241884	-0.250426	-0.270253	-0.262126	-0.298444	-0.253318	-0.164477	-0.178858	0.0710312			0.195571	0.1581	0.156724	-0.172198	0.00819775	0.0475919	-0.0555972	-0.00936533	0.0353137	0.0791706	-0.0300722	0.138555	-0.151204	-0.350709	0.0874344	-1.39714
LTUS28	-0.138478	-0.17639	-0.219463	-0.306517	-0.230206	-0.220199	-0.266892	-0.246544	-0.216526	-0.221485	-0.202398	-0.202702	-0.247392	-0.168224	-0.00665113	-0.0484498	0.275219			0.273774	0.244192	0.396671	-0.248962	-0.0434688	0.212048	-0.0762414	-0.121754	0.0229007	-0.0861761	0.00150391	0.22047	-0.320011	-0.960463	6.28445	-6.6805
LTUS29	0.107686	0.0437705	0.00398197	-0.076036	0.00898915	-0.047202	-0.0915744	-0.0690001	-0.187893	-0.252001	-0.320654	-0.480418	-0.394017	-0.114483	-0.134639	-0.194963	0.237495			-0.593536	-0.909026	-20.0951	-1.11822	-6.25099	0.940056	-0.246513	1.72309	0.341194	0.27243	0.498245	-0.179845	-0.709448	0.176063	0.448041	-2.21816
LTUS30	-0.205518	-0.249099	-0.347937	-0.44134	-0.34618	-0.354257	-0.396235	-0.367924	-0.305399	-0.31298	-0.360039	-0.258061	-0.307694	-0.158261	-0.0186139	-0.0929078	0.420447			0.212057	0.39678	0.268448	-0.215615	0.0233322	0.118495	-0.0714515	-0.169939	0.0248219	0.150359	-0.283242	0.192334	-0.485656	-0.882385	3.99132	-5.52543
LTUS31	-0.263031	-0.259275	-0.377211	-0.45639	-0.35271	-0.336302	-0.3397	-0.311941	-0.284654	-0.304269	-0.452676	-0.176289	-0.234913	-0.175071	-0.0126791	-0.0529495	0.345545			-0.0142817	0.454869	0.209907	-0.227174	-0.0465198	0.0101034	-0.0817176	-0.0874749	0.0689093	0.487749	-0.610561	0.33254	-0.254739	-0.927578	3.17613	-7.52594
LTUS32	0.0283903	-0.0369159	-0.0603959	-0.0965693	-0.0870389	-0.0831738	-0.189109	-0.206532	-0.164656	-0.365174	-0.36844	-0.309039	-0.41829	-0.328257	-0.252008	-0.409431	0.0517034			-2.3003	0.636043	0.598937	-0.0986892	-0.0444066	1.27367	0.0921286	-0.202756	1.2178	0.00894174	-0.161222	0.353518	-0.215241	-0.232284	0.624675	-1.12628
LTUS33	-0.139564	-0.168098	-0.119685	-0.126925	-0.143796	-0.157903	-0.26284	-0.278348	-0.250792	-0.265287	-0.22295	-0.13124	-0.17871	-0.181322	-0.0724653	-0.148545	-0.184184			0.204452	-0.288002	0.0604854	0.132928	0.0981008	0.664564	0.0590019	-0.0989977	0.0577984	-0.159589	-0.411348	0.361701	0.0146159	-0.60035	1.04987	0.239923
LTUS34	-0.308612	-0.303509	-0.38098	-0.452771	-0.359607	-0.35254	-0.373698	-0.346786	-0.276826	-0.266377	-0.334543	-0.177745	-0.325818	-0.165456	-0.0442045	-0.120769	0.284555			-0.0165362	0.255251	0.188437	-0.205763	-0.0196533	0.0600163	-0.0720154	-0.201737	-0.0377474	0.255902	-0.468694	0.833069	-0.492183	-0.732832	1.73206	-3.35618
LTUS35																				#DIV/0!	#DIV/0!	#DIV/0!	#DIV/0!	#DIV/0!	#DIV/0!	#DIV/0!	#DIV/0!	#DIV/0!	#DIV/0!	#DIV/0!	#DIV/0!	#DIV/0!	#DIV/0!	#DIV/0!	#DIV/0!
LUXS1	-0.289355	-0.330007	-0.283579	-0.39944	-0.397208	-0.354234	-0.477703	-0.441914	-0.448463	-0.42226	-0.393102	-0.414149	-0.309286	-0.274224	-0.254047	-0.258872	-0.265978			0.140491	-0.140688	0.408569	-0.00558914	-0.10819	0.348554	-0.07492	0.01482	-0.0584279	-0.0690519	0.0535397	-0.253201	-0.113365	-0.0735781	0.0189939	0.0274506
LUXS2	-0.212726	-0.187689	-0.281147	-0.218473	-0.23744	-0.214733	-0.24282	-0.213737	-0.211983	-0.272806	-0.263364	-0.209289	-0.177764	-0.186032	-0.172152	-0.165957	-0.166653			-0.117696	0.497941	-0.222923	0.0868161	-0.0956324	0.130797	-0.11977	-0.00820842	0.286924	-0.0346104	-0.205323	-0.150628	0.0465095	-0.0746107	-0.0359874	0.00419259
LUXS3	-0.23371	-0.149278	-0.34777	-0.541705	-0.540036	-0.387054	-0.481516	-0.438888	-0.443671	-0.433704	-0.400055	-0.406178	-0.462818	-0.398077	-0.368533	-0.385466	-0.413056			-0.361265	1.32968	0.557653	-0.00308274	-0.28328	0.244052	-0.0885271	0.0108963	-0.0224632	-0.0775863	0.0153065	0.139446	-0.139885	-0.074215	0.0459456	0.0715747
LUXS4	-0.512177	-0.476746	-0.505696	-0.501157	-0.444864	-0.434468	-0.440695	-0.427904	-0.42993	-0.419256	-0.418851	-0.37302	-0.324323	-0.308702	-0.278305	-0.282745	-0.295486			-0.0691758	0.0607241	-0.00897571	-0.112326	-0.0233688	0.014332	-0.0290256	0.00473518	-0.0248261	-0.000965662	-0.109421	-0.130547	-0.0481676	-0.0984663	0.0159547	0.0450617
LUXS5																				#DIV/0!	#DIV/0!	#DIV/0!	#DIV/0!	#DIV/0!	#DIV/0!	#DIV/0!	#DIV/0!	#DIV/0!	#DIV/0!	#DIV/0!	#DIV/0!	#DIV/0!	#DIV/0!	#DIV/0!	#DIV/0!
LUXS6	-0.319252	-0.309201	-0.304416	-0.294541	-0.297412	-0.290512	-0.330234	-0.293079	-0.286048	-0.390914	-0.378376	-0.24542	-0.202204	-0.214285	-0.199315	-0.204196	-0.21616			-0.0314836	-0.0154764	-0.032437	0.00974655	-0.0232004	0.13673	-0.112512	-0.0239881	0.3666	-0.0320722	-0.351388	-0.176087	0.0597475	-0.0698621	0.0244899	0.0585906
LUXS7	-0.480379	-0.467612	-0.507722	-0.456294	-0.449364	-0.500125	-0.556966	-0.370281	-0.383449	-0.370095	-0.346716	-0.403877	-0.332162	-0.373947	-0.380564	-0.394229	-0.416394			-0.0265758	0.085777	-0.101293	-0.0151871	0.112962	0.113654	-0.335182	0.0355637	-0.0348261	-0.0631713	0.164864	-0.177566	0.125798	0.017695	0.0359051	0.0562259
LUXS8																				#DIV/0!	#DIV/0!	#DIV/0!	#DIV/0!	#DIV/0!	#DIV/0!	#DIV/0!	#DIV/0!	#DIV/0!	#DIV/0!	#DIV/0!	#DIV/0!	#DIV/0!	#DIV/0!	#DIV/0!	#DIV/0!
LUXS9	-0.561227	-0.51443	-0.467667	-0.534021	-0.514554	-0.532397	-0.560966	-0.581726	-0.586418	-0.561865	-0.576851	-0.354956	-0.363773	-0.366694	-0.342752	-0.341221	-0.347778			-0.0833844	-0.0909029	0.141883	-0.0364532	0.0346761	0.0536614	0.0370087	0.00806552	-0.0418709	0.026673	-0.384667	0.0248394	0.00803167	-0.0652921	-0.00446647	0.019216
LUXS10	-0.624876	-0.621905	-0.541084	-0.631241	-0.631384	-0.589044	-0.587188	-0.586305	-0.590744	-0.582345	-0.576947	-0.628131	-0.591698	-0.583831	-0.543305	-0.557114	-0.53451			-0.00475456	-0.129957	0.166623	0.000227228	-0.0670601	-0.00315023	-0.00150489	0.00757218	-0.0142186	-0.00926898	0.0887147	-0.058001	-0.013296	-0.0694135	0.0254157	-0.0405739
LUXS11	-0.572605	-0.597926	-0.503401	-0.507088	-0.579093	-0.517912	-0.507473	-0.472735	-0.469706	-0.446903	-0.443037	-0.583349	-0.569833	-0.498744	-0.51352	-0.468306	-0.588015			0.0442193	-0.158088	0.00732486	0.141996	-0.10565	-0.0201562	-0.0684528	-0.00640736	-0.0485461	-0.00865159	0.316704	-0.0231691	-0.124754	0.0296264	-0.0880469	0.255621
LUXS12	-0.805479	-0.800102	-0.802497	-0.840853	-0.803063	-0.814362	-0.805942	-0.778822	-0.781206	-0.753393	-0.752974	-0.750617	-0.740091	-0.688165	-0.63488	-0.651911	-0.665341			-0.00667562	0.00299392	0.0477957	-0.0449422	0.0140696	-0.0103393	-0.0336504	0.00306159	-0.0356032	-0.000555574	-0.00313005	-0.0140242	-0.0701613	-0.077431	0.0268266	0.0206006
LUXS13	-0.511866	-0.455675	-0.454067	-0.510731	-0.472833	-0.475221	-0.441188	-0.462417	-0.463051	-0.486027	-0.465518	-0.513992	-0.468548	-0.407194	-0.405142	-0.41442	-0.432477			-0.109776	-0.00353009	0.124794	-0.0742049	0.00505046	-0.0716132	0.048116	0.00137226	0.049618	-0.0421977	0.104129	-0.0884142	-0.130943	-0.00504066	0.0229012	0.0435706
LUXS14	-0.434026	-0.378445	-0.477803	-0.448117	-0.451485	-0.413505	-0.392173	-0.386643	-0.385376	-0.367226	-0.378618	-0.416553	-0.394824	-0.35912	-0.356699	-0.364157	-0.378832			-0.128058	0.262541	-0.0621302	0.00751661	-0.0841222	-0.0515878	-0.0141012	-0.00327648	-0.0470971	0.0310226	0.100193	-0.0521651	-0.0904295	-0.00674205	0.0209085	0.040299
LUXS15	-0.229302	-0.196002	-0.254874	-0.193563	-0.210029	-0.223375	-0.232361	-0.217763	-0.218595	-0.349561	-0.341746	-0.208751	-0.231635	-0.184328	-0.248695	-0.215095	-0.17934			-0.145225	0.300364	-0.240552	0.0850655	0.0635431	0.0402308	-0.0628237	0.00382034	0.599122	-0.0223542	-0.389165	0.109625	-0.204232	0.349201	-0.135107	-0.166229
LUXS16	-0.275417	-0.279327	-0.209495	-0.262018	-0.177149	-0.153849	-0.195623	-0.181351	-0.176792	-0.263408	-0.255212	-0.227997	-0.23788	-0.209332	-0.195759	-0.207037	-0.219873			0.0141958	-0.250002	0.250711	-0.323903	-0.131527	0.271524	-0.0729574	-0.0251395	0.489932	-0.0311144	-0.106637	0.0433455	-0.120011	-0.0648386	0.0576123	0.0620001
LUXS17	-0.575382	-0.547219	-0.668618	-0.607085	-0.644008	-0.623432	-0.428551	-0.522675	-0.483674	-0.62884	-0.494409	-0.491553	-0.406286	-0.44254	-0.392873	-0.481841	-0.564754			-0.0489473	0.221849	-0.0920299	0.06082	-0.0319497	-0.312594	0.219632	-0.0746168	0.300131	-0.213777	-0.00577629	-0.173465	0.0892322	-0.112231	0.226456	0.172075
LUXS18	-0.708418	-0.7368	-0.768287	-0.792651	-0.759591	-0.770391	-0.740362	-0.766638	-0.757026	-0.718895	-0.69701	-0.591388	-0.588068	-0.532925	-0.516675	-0.53367	-0.56249			0.040065	0.0427348	0.0317121	-0.0417086	0.0142183	-0.0389794	0.035491	-0.0125383	-0.0503693	-0.0304418	-0.151537	-0.005614	-0.0937684	-0.0304937	0.0328945	0.0540029
LUXS19	-0.328241	-0.344875	-0.390051	-0.360304	-0.364061	-0.367462	-0.345594	-0.366386	-0.374991	-0.386206	-0.41181	-0.366951	-0.3599	-0.34161	-0.333325	-0.324049	-0.32767			0.0506746	0.130991	-0.0762641	0.010427	0.00934406	-0.0595117	0.0601638	0.0234848	0.0299069	0.0662977	-0.108931	-0.0192166	-0.0508196	-0.0242537	-0.0278287	0.0111766
LUXS20	-0.759174	-0.79594	-0.795333	-0.823759	-0.79693	-0.805148	-0.795467	-0.812165	-0.805211	-0.776961	-0.774631	-0.653707	-0.665622	-0.630047	-0.60982	-0.614912	-0.640969			0.0484295	-0.000763416	0.0357418	-0.0325696	0.0103121	-0.0120242	0.0209918	-0.00856195	-0.0350841	-0.0029993	-0.156105	0.018227	-0.0534462	-0.0321042	0.00835044	0.0423745
LUXS21	-0.670647	-0.661935	-0.690075	-0.739561	-0.764874	-0.788569	-0.792402	-0.799412	-0.790796	-0.760577	-0.676992	-0.635248	-0.632809	-0.604069	-0.577471	-0.582613	-0.603653			-0.0129895	0.0425109	0.0717118	0.0342261	0.0309796	0.00486056	0.00884636	-0.0107776	-0.0382139	-0.109896	-0.0616614	-0.0038401	-0.0454156	-0.0440318	0.00890514	0.0361123
LUXS22	-0.35194	-0.325139	-0.410909	-0.387866	-0.406341	-0.413747	-0.406199	-0.406689	-0.42212	-0.470614	-0.456354	-0.369868	-0.308349	-0.286748	-0.266011	-0.268573	-0.296605			-0.076153	0.263795	-0.0560769	0.0476319	0.0182258	-0.0182443	0.00120827	0.0379416	0.114882	-0.0302998	-0.189516	-0.166326	-0.0700552	-0.0723162	0.00962945	0.104377
LUXS23	-0.641251	-0.669084	-0.587274	-0.579773	-0.576903	-0.562356	-0.528757	-0.574078	-0.587082	-0.574999	-0.580063	-0.435216	-0.400812	-0.393551	-0.363262	-0.365205	-0.329214			0.0434041	-0.122271	-0.0127734	-0.00494995	-0.0252159	-0.0597456	0.0857124	0.0226504	-0.0205811	0.00880699	-0.249709	-0.079051	-0.0181148	-0.0769637	0.00534919	-0.0985512
LUXS24	-0.48912	-0.428299	-0.434978	-0.404234	-0.464409	-0.425436	-0.412087	-0.284529	-0.304329	-0.420489	-0.306986	-0.334324	-0.330459	-0.30227	-0.397078	-0.418096	-0.362255			-0.124347	0.0155938	-0.0706795	0.148862	-0.0839201	-0.0313776	-0.309542	0.0695889	0.381694	-0.26993	0.0890502	-0.0115599	-0.0853018	0.313652	0.0529334	-0.133562
LUXS25	-0.53786	-0.528461	-0.489824	-0.469038	-0.503303	-0.462465	-0.506302	-0.509589	-0.524064	-0.509414	-0.485909	-0.567569	-0.425454	-0.376079	-0.368293	-0.392074	-0.406469			-0.0174737	-0.0731136	-0.0424353	0.073055	-0.0811409	0.0947911	0.00649061	0.0284067	-0.027956	-0.0461406	0.168056	-0.250392	-0.116054	-0.0207034	0.0645719	0.0367142
LUXS26	-0.575521	-0.589219	-0.563407	-0.568055	-0.552595	-0.521761	-0.552413	-0.588322	-0.579997	-0.713545	-0.699354	-0.497381	-0.490788	-0.454923	-0.458602	-0.498091	-0.522568			0.0238009	-0.0438058	0.00824816	-0.0272151	-0.0557988	0.0587474	0.065005	-0.0141517	0.230258	-0.019888	-0.2888	-0.0132545	-0.0730775	0.00808726	0.086107	0.0491424
LUXS27	-0.754999	-0.666473	-0.723754	-0.76431	-0.732686	-0.77283	-0.742323	-0.691725	-0.690383	-0.678556	-0.686009	-0.607242	-0.611418	-0.563052	-0.561998	-0.56907	-0.586339			-0.117253	0.085947	0.0560352	-0.0413754	0.0547889	-0.039474	-0.0681612	-0.00194032	-0.0171309	0.0109831	-0.114819	0.00687635	-0.079104	-0.00187259	0.0125842	0.0303463
LUXS28	-0.966757	-0.951578	-0.963067	-0.964365	-0.966612	-0.968528	-0.970558	-0.968414	-0.969935	-0.967069	-0.964719	-0.923303	-0.923326	-0.895184	-0.881663	-0.87339	-0.873909			-0.0157008	0.012073	0.00134779	0.00233009	0.0019819	0.00209686	-0.00220953	0.00157068	-0.00295474	-0.0024298	-0.0429315	2.49366e-05	-0.0304789	-0.0151038	-0.00938378	0.000595168
LUXS29	-0.546932	-0.589857	-0.695716	-0.613005	-0.659298	-0.665246	-0.671439	-0.642319	-0.658179	-0.678473	-0.692996	-0.542051	-0.496977	-0.49048	-0.508801	-0.506226	-0.525305			0.0784831	0.179465	-0.118886	0.0755171	0.00902185	0.0093107	-0.0433698	0.0246908	0.0308334	0.0214062	-0.217816	-0.0831533	-0.0130728	0.0373528	-0.00506213	0.03769
LUXS30	-0.836363	-0.841814	-0.82962	-0.865306	-0.846193	-0.842709	-0.864945	-0.868399	-0.861014	-0.854547	-0.857983	-0.784427	-0.814027	-0.761432	-0.80175	-0.826331	-0.845431			0.00651697	-0.0144852	0.0430142	-0.0220879	-0.00411671	0.0263854	0.00399432	-0.00850504	-0.00751042	0.00402123	-0.085732	0.0377348	-0.0646105	0.0529493	0.0306603	0.023114
LUXS31	-0.517211	-0.556309	-0.571326	-0.619162	-0.586078	-0.572547	-0.529909	-0.566216	-0.566165	-0.570136	-0.693212	-0.546594	-0.47638	-0.441866	-0.417977	-0.422608	-0.440127			0.0755939	0.0269945	0.083729	-0.0534332	-0.0230875	-0.0744709	0.0685142	-8.93413e-05	0.00701447	0.215871	-0.211506	-0.128457	-0.0724492	-0.0540652	0.0110811	0.0414525
LUXS32	-0.406966	-0.423065	-0.497331	-0.528737	-0.507938	-0.507983	-0.599435	-0.486118	-0.484044	-0.620419	-0.549231	-0.38658	-0.248317	-0.267158	-0.242656	-0.245922	-0.261928			0.0395595	0.175541	0.063149	-0.0393366	8.88941e-05	0.180029	-0.18904	-0.00426586	0.281742	-0.114743	-0.296143	-0.357657	0.0758741	-0.0917138	0.0134601	0.0650845
LUXS33	-0.510796	-0.50012	-0.56274	-0.560529	-0.52824	-0.520759	-0.526233	-0.556124	-0.548547	-0.577236	-0.592645	-0.307818	-0.271806	-0.314398	-0.259889	-0.245406	-0.262946			-0.0209004	0.125208	-0.00392759	-0.0576054	-0.0141618	0.0105113	0.0568021	-0.0136255	0.0523009	0.0266935	-0.480602	-0.116992	0.156702	-0.173375	-0.0557277	0.071473
LUXS34	-0.561648	-0.614349	-0.592928	-0.645699	-0.592444	-0.593699	-0.524248	-0.549092	-0.549674	-0.498042	-0.518279	-0.487849	-0.488219	-0.458399	-0.443422	-0.444817	-0.463565			0.0938329	-0.0348689	0.0890013	-0.0824768	0.00211887	-0.11698	0.0473891	0.00106035	-0.0939327	0.0406328	-0.0587121	0.000757727	-0.0610804	-0.0326722	0.00314758	0.0421469
LUXS35																				#DIV/0!	#DIV/0!	#DIV/0!	#DIV/0!	#DIV/0!	#DIV/0!	#DIV/0!	#DIV/0!	#DIV/0!	#DIV/0!	#DIV/0!	#DIV/0!	#DIV/0!	#DIV/0!	#DIV/0!	#DIV/0!
LVAS1	-0.554269	-0.603401	-0.571702	-0.466973	-0.407468	-0.511387	-0.606343	-0.5673	-0.660243	-0.654538	-0.691992	-0.770496	-0.670506	-0.618947	-0.6464	-0.716411	-0.605178			0.0886434	-0.0525345	-0.183189	-0.127427	0.255037	0.185682	-0.0643908	0.163834	-0.00864008	0.0572223	0.113446	-0.129774	-0.0768956	0.0443546	0.108309	-0.155264
LVAS2	-0.341001	-0.307554	-0.278614	-0.342248	-0.345598	-0.331635	-0.404272	-0.378449	-0.336547	-0.378069	-0.408147	-0.358365	-0.446385	-0.45297	-0.427684	-0.427461	-0.390677			-0.0980844	-0.0940989	0.228397	0.00978691	-0.0404002	0.219024	-0.063874	-0.110722	0.123377	0.0795577	-0.121971	0.245615	0.0147513	-0.0558219	-0.000521428	-0.0860521
LVAS3	-0.0837882	-0.209861	-0.156913	-0.204454	-0.534912	-0.295872	-0.520034	-0.561594	-0.589427	-0.629731	-0.660046	-0.530018	-0.372828	-0.300297	-0.32975	-0.562605	-0.605152			1.50466	-0.252301	0.302976	1.6163	-0.446878	0.757633	0.0799191	0.0495607	0.0683776	0.0481395	-0.196998	-0.296574	-0.194543	0.0980804	0.706154	0.075625
LVAS4	-0.271169	-0.218317	-0.276745	-0.241973	-0.254567	-0.252168	-0.278649	-0.261103	-0.292794	-0.338034	-0.345254	-0.269792	-0.264509	-0.305195	-0.26211	-0.279759	-0.301013			-0.194906	0.267629	-0.125646	0.052047	-0.00942306	0.105014	-0.0629694	0.121374	0.15451	0.0213612	-0.218571	-0.019582	0.153819	-0.141171	0.0673329	0.0759737
LVAS5	-0.116923	-0.109925	-0.053829	-0.0671601	-0.136215	-0.0943083	-0.134612	-0.128954	-0.126319	-0.120744	-0.106553	-0.0722753	-0.0765979	-0.0895035	-0.0805419	-0.0655844	-0.0956187			-0.0598465	-0.510312	0.247656	1.02822	-0.307653	0.427357	-0.0420266	-0.020437	-0.0441376	-0.117529	-0.321694	0.0598063	0.168486	-0.100126	-0.185711	0.45795
LVAS6	-0.101097	-0.124583	-0.0907223	0.068498	-0.0492342	-0.0510751	-0.186559	-0.0978785	-0.255374	-0.219169	-0.28481	-0.439042	-0.269525	-0.219645	-0.435248	-0.373723	-0.337964			0.23231	-0.271793	-1.75503	-1.71877	0.0373903	2.65265	-0.475349	1.60909	-0.141773	0.299499	0.541527	-0.386106	-0.185067	0.981599	-0.141356	-0.0956837
LVAS7	-0.266237	-0.220157	-0.186957	-0.245566	-0.253362	-0.25135	-0.279659	-0.26306	-0.284196	-0.332348	-0.333473	-0.270905	-0.278024	-0.395714	-0.258561	-0.347215	-0.410697			-0.173081	-0.150801	0.313489	0.0317478	-0.00794003	0.112628	-0.0593553	0.0803458	0.169434	0.00338363	-0.187624	0.0262772	0.423312	-0.346597	0.342875	0.182833
LVAS8	-0.305898	-0.0555487	-0.0415273	-0.0482303	-0.0569335	-0.0499689	-0.116858	-0.112226	-0.145322	-0.136971	-0.134879	-0.0784693	-0.0618347	-0.0652437	-0.0642137	-0.0588885	-0.0683205			-0.818408	-0.252416	0.161413	0.180449	-0.122328	1.3386	-0.0396371	0.294909	-0.0574686	-0.0152703	-0.418225	-0.211989	0.0551322	-0.0157883	-0.0829294	0.160167
LVAS9	-0.148264	-0.379786	-0.374284	-0.322444	-0.281427	-0.324868	-0.418942	-0.393406	-0.425267	-0.434811	-0.452245	-0.475886	-0.314571	-0.410733	-0.356464	-0.317644	-0.32401			1.56155	-0.0144874	-0.138507	-0.127206	0.154363	0.289575	-0.0609547	0.0809886	0.0224427	0.0400954	0.0522745	-0.338979	0.305693	-0.132127	-0.108903	0.0200403
LVAS10	-0.202153	-0.190488	-0.25552	-0.238967	-0.239179	-0.35935	-0.498833	-0.461575	-0.430902	-0.390379	-0.451029	-0.32351	-0.348761	-0.349152	-0.357782	-0.349649	-0.400504			-0.0577035	0.341396	-0.0647815	0.000887552	0.502427	0.388155	-0.0746902	-0.0664524	-0.0940435	0.155363	-0.28273	0.0780531	0.00112215	0.0247174	-0.0227342	0.145448
LVAS11	-0.441032	-0.45156	-0.404686	-0.453877	-0.50602	-0.481552	-0.497662	-0.404215	-0.377189	-0.540682	-0.569021	-0.413625	-0.418226	-0.383632	-0.536607	-0.449747	-0.457025			0.0238716	-0.103806	0.121554	0.114884	-0.0483533	0.0334543	-0.187772	-0.0668609	0.433452	0.052413	-0.273094	0.0111238	-0.0827164	0.398756	-0.161868	0.0161808
LVAS12	-0.675784	-0.70096	-0.584495	-0.724495	-0.728134	-0.761107	-0.767022	-0.777758	-0.75405	-0.713585	-0.757442	-0.634653	-0.643586	-0.646303	-0.699438	-0.645239	-0.702153			0.0372551	-0.166151	0.239523	0.00502353	0.0452841	0.00777131	0.0139968	-0.0304819	-0.0536635	0.0614599	-0.162111	0.0140764	0.00422079	0.0822143	-0.07749	0.0882061
LVAS13	-0.252902	-0.327792	-0.353237	-0.373182	-0.37719	-0.391934	-0.386025	-0.330639	-0.281393	-0.37045	-0.423255	-0.389415	-0.392954	-0.463825	-0.515485	-0.440526	-0.507657			0.296125	0.0776248	0.0564638	0.0107387	0.0390894	-0.0150771	-0.143477	-0.148943	0.316488	0.142541	-0.0799508	0.00908679	0.180355	0.111379	-0.145414	0.152388
LVAS14	-0.25631	-0.211786	-0.185297	-0.247259	-0.263178	-0.264828	-0.294993	-0.274881	-0.297361	-0.343843	-0.351491	-0.480721	-0.544519	-0.551362	-0.477568	-0.463859	-0.597517			-0.173711	-0.125072	0.33439	0.0643805	0.00626931	0.113905	-0.0681788	0.0817824	0.156314	0.0222432	0.367663	0.132712	0.012568	-0.133839	-0.0287073	0.288145
LVAS15	-0.33589	-0.304605	-0.229392	-0.28773	-0.31469	-0.290292	-0.338034	-0.31222	-0.317924	-0.330414	-0.367147	-0.393795	-0.327524	-0.388617	-0.446497	-0.355384	-0.404918			-0.0931419	-0.246919	0.254318	0.0936958	-0.0775276	0.164462	-0.0763661	0.0182702	0.0392859	0.111173	0.0725809	-0.168288	0.18653	0.148938	-0.204061	0.13938
LVAS16	-0.240949	-0.231453	-0.215514	-0.193456	-0.245414	-0.227441	-0.290908	-0.257768	-0.307576	-0.318977	-0.338707	-0.327079	-0.302544	-0.290403	-0.326127	-0.313793	-0.325865			-0.0394077	-0.0688656	-0.102353	0.268581	-0.0732358	0.279049	-0.11392	0.193227	0.0370668	0.0618552	-0.03433	-0.0750149	-0.0401274	0.123015	-0.0378187	0.038469
LVAS17	-0.744345	-0.68904	-0.673122	-0.70337	-0.751102	-0.748247	-0.752313	-0.561607	-0.537514	-0.823311	-0.829964	-0.628271	-0.661324	-0.636353	-0.667693	-0.727894	-0.783729			-0.0742995	-0.0231022	0.0449373	0.067862	-0.00380078	0.00543309	-0.253492	-0.0429003	0.531702	0.00807993	-0.243014	0.0526095	-0.0377583	0.0492487	0.0901624	0.0767082
LVAS18	0.167408	0.266572	0.3032	0.0458493	0.0590464	-0.112478	0.0503483	-0.044405	0.0488603	-0.262863	-0.175491	-0.235404	-0.149407	-0.208089	-0.394199	-0.201967	-0.335695			0.592351	0.137401	-0.848782	0.287836	-2.90491	-1.44763	-1.88196	-2.10033	-6.37989	-0.332385	0.341398	-0.365317	0.392771	0.894376	-0.487652	0.662127
LVAS19	-0.222796	-0.209055	-0.246405	-0.271659	-0.292798	-0.280014	-0.297914	-0.206027	-0.203374	-0.355368	-0.343012	-0.219481	-0.201179	-0.240218	-0.289404	-0.312414	-0.294399			-0.0616763	0.178662	0.102489	0.0778155	-0.0436607	0.063926	-0.308434	-0.012876	0.747359	-0.0347707	-0.360135	-0.0833869	0.194051	0.204755	0.0795075	-0.0576645
LVAS20	-0.220916	-0.0182878	0.0803678	-0.0871312	-0.165615	-0.15143	-0.196584	-0.13216	-0.230857	-0.313251	-0.355597	-0.202263	-0.217128	-0.148468	-0.105368	-0.18431	-0.191118			-0.917218	-5.39461	-2.08416	0.900756	-0.0856504	0.298183	-0.327716	0.746796	0.356905	0.135183	-0.4312	0.0734911	-0.316217	-0.290302	0.749202	0.0369379
LVAS21	0.00965601	0.003922	-0.0798143	-0.12106	-0.171322	-0.155119	-0.162145	0.0473697	0.037588	-0.29418	-0.280873	0.0914356	0.15509	0.106256	-0.0647553	-0.179442	-0.26371			-0.593828	-21.3504	0.516768	0.415189	-0.0945763	0.045295	-1.29214	-0.206496	-8.82643	-0.0452352	-1.32554	0.696169	-0.314879	-1.60943	1.77108	0.46961
LVAS22	-0.104337	-0.113918	-0.149364	-0.168919	-0.264095	-0.252306	-0.263253	-0.241266	-0.337876	-0.38261	-0.424139	-0.128735	-0.0594921	-0.172934	-0.267203	-0.287864	-0.334678			0.0918269	0.311153	0.130922	0.563443	-0.0446423	0.0433875	-0.0835204	0.400431	0.132397	0.108542	-0.69648	-0.53787	1.90685	0.545112	0.0773243	0.162626
LVAS23	-0.576748	-0.497232	-0.392696	-0.507672	-0.459682	-0.504549	-0.608886	-0.558723	-0.667057	-0.702748	-0.719413	-0.719163	-0.726331	-0.669255	-0.655193	-0.715113	-0.556019			-0.137869	-0.210236	0.292786	-0.0945298	0.0976048	0.206793	-0.0823848	0.193895	0.0535059	0.023714	-0.000348262	0.00996727	-0.0785806	-0.0210123	0.0914552	-0.222475
LVAS24	-0.258116	-0.242287	-0.274356	-0.302955	-0.222947	-0.274534	-0.281142	-0.246711	-0.214365	-0.246672	-0.238517	-0.196894	-0.192552	-0.178636	-0.219623	-0.212302	-0.234872			-0.0613241	0.132358	0.104242	-0.264093	0.23139	0.0240696	-0.12247	-0.131109	0.150709	-0.0330573	-0.174508	-0.0220511	-0.0722732	0.229441	-0.0333303	0.10631
LVAS25	-0.375917	-0.337101	-0.286464	-0.349399	-0.387116	-0.395529	-0.436238	-0.398316	-0.425713	-0.49005	-0.514849	-0.496576	-0.400352	-0.348815	-0.290127	-0.305468	-0.343712			-0.103259	-0.150211	0.219693	0.10795	0.0217313	0.102925	-0.0869295	0.0687803	0.151128	0.0506059	-0.035492	-0.193776	-0.128729	-0.168251	0.0528796	0.125198
LVAS26	-0.511489	-0.430537	-0.336172	-0.442272	-0.42203	-0.453049	-0.542251	-0.50185	-0.586837	-0.622449	-0.639184	-0.586444	-0.61034	-0.553057	-0.518319	-0.562151	-0.404918			-0.158267	-0.21918	0.315612	-0.0457686	0.0735011	0.196891	-0.0745055	0.169346	0.0606863	0.0268849	-0.0825114	0.0407472	-0.0938544	-0.0628115	0.0845671	-0.2797
LVAS27	-0.0738874	-0.00119855	-0.0626656	-0.0821852	-0.123997	-0.123495	-0.170138	-0.135873	-0.185456	-0.258952	-0.247786	-0.162011	-0.155165	-0.0724389	-0.295952	-0.301262	-0.371099			-0.983779	51.2847	0.311488	0.508748	-0.00404874	0.377693	-0.201394	0.364922	0.396301	-0.0431202	-0.346165	-0.0422593	-0.533148	3.08554	0.0179407	0.231815
LVAS28	-0.0720877	-0.0276625	-0.0497062	-0.0710018	-0.118026	-0.122423	-0.155548	-0.111827	-0.168859	-0.262061	-0.259822	-0.135894	-0.109156	-0.0369238	-0.289486	-0.300138	-0.374074			-0.616266	0.796878	0.428429	0.662301	0.0372558	0.270572	-0.281076	0.509999	0.551957	-0.00854348	-0.476974	-0.196756	-0.661733	6.84008	0.0367961	0.246339
LVAS29	-0.0122241	-0.00667086	-0.162796	-0.225662	-0.260665	-0.286893	-0.277993	-0.0183197	0.00904878	-0.364699	-0.353668	-0.0821591	0.00383048	-0.0541991	-0.225937	-0.333644	-0.353367			-0.454286	23.4041	0.386164	0.15511	0.100621	-0.0310205	-0.9341	-1.49394	-41.3037	-0.0302464	-0.767694	-1.04662	-15.1494	3.16865	0.476713	0.0591123
LVAS30	0.105697	0.163806	0.00553408	0.0266041	-0.0562203	-0.0395906	-0.0951608	-0.0375921	-0.0963856	-0.289984	-0.300846	-0.130867	-0.140171	-0.041977	-0.347665	-0.36232	-0.454172			0.549772	-0.966216	3.80732	-3.11322	-0.295796	1.40362	-0.604962	1.56398	2.00859	0.0374563	-0.565003	0.0710941	-0.700531	7.28228	0.0421537	0.253509
LVAS31	0.0412037	-0.10718	-0.173217	-0.16081	-0.235562	-0.192001	-0.185999	-0.0209286	-0.0831746	-0.29714	-0.314759	-0.0858821	-0.0196661	0.0996803	-0.228244	-0.223902	-0.317122			-3.60122	0.616132	-0.0716262	0.46485	-0.184926	-0.0312595	-0.88748	2.9742	2.57248	0.0592957	-0.72715	-0.771011	-6.06865	-3.28976	-0.0190255	0.416344
LVAS32	-0.441831	-0.455875	-0.451896	-0.485016	-0.520141	-0.511543	-0.513285	-0.403342	-0.390925	-0.550282	-0.533753	-0.375386	-0.372316	-0.338472	-0.427883	-0.51459	-0.523229			0.0317875	-0.00873031	0.073292	0.0724208	-0.0165296	0.0034043	-0.214195	-0.0307833	0.407638	-0.0300361	-0.296705	-0.00817716	-0.0909022	0.26416	0.202642	0.0167887
LVAS33	-0.566328	-0.537689	-0.560299	-0.592839	-0.638701	-0.427823	-0.435777	-0.367191	-0.474833	-0.478725	-0.543613	-0.486122	-0.470766	-0.662995	-0.439528	-0.472695	-0.434586			-0.05057	0.0420514	0.0580761	0.0773595	-0.330167	0.0185925	-0.157388	0.293148	0.00819667	0.135545	-0.105757	-0.0315878	0.408331	-0.337056	0.0754595	-0.0806211
LVAS34	-0.11092	-0.04305	-0.118277	-0.110757	-0.156666	-0.137377	-0.157175	-0.0443956	-0.0597038	-0.232382	-0.216358	-0.0403293	-0.0261582	-0.042211	-0.255896	-0.287282	-0.363726			-0.611884	1.74743	-0.063583	0.414512	-0.123121	0.144112	-0.71754	0.344813	2.89225	-0.0689565	-0.813599	-0.351385	0.613681	5.06231	0.12265	0.266096
LVAS35																				#DIV/0!	#DIV/0!	#DIV/0!	#DIV/0!	#DIV/0!	#DIV/0!	#DIV/0!	#DIV/0!	#DIV/0!	#DIV/0!	#DIV/0!	#DIV/0!	#DIV/0!	#DIV/0!	#DIV/0!	#DIV/0!
MEXS1	-0.370826	-0.421025	-0.401701	-0.39355	-0.4496	-0.404597	-0.393756	-0.404207	-0.374435	-0.404348	-0.438595	-0.441767	-0.410233	-0.423537	-0.38043	-0.403377	-0.387262			0.135371	-0.0458968	-0.0202902	0.14242	-0.100096	-0.0267946	0.0265434	-0.0736564	0.079888	0.0846964	0.00723305	-0.0713817	0.0324308	-0.10178	0.0603191	-0.0399503
MEXS2	-0.399488	-0.411545	-0.348229	-0.356304	-0.362984	-0.320539	-0.350647	-0.352826	-0.172647	-0.352872	-0.311304	-0.28911	-0.25015	-0.292051	-0.300006	-0.262622	-0.177627			0.03018	-0.153848	0.0231871	0.0187496	-0.116934	0.0939278	0.00621647	-0.510674	1.04389	-0.117799	-0.0712929	-0.134757	0.167503	0.0272371	-0.124612	-0.32364
MEXS3	-0.231535	-0.365767	-0.300691	-0.292741	-0.420441	-0.306354	-0.2968	-0.320697	-0.281913	-0.338989	-0.404214	-0.445414	-0.371885	-0.351967	-0.292443	-0.333675	-0.314488			0.579746	-0.177915	-0.0264409	0.436223	-0.27135	-0.0311871	0.0805159	-0.120936	0.202456	0.192412	0.101925	-0.16508	-0.0535585	-0.169119	0.140992	-0.0575011
MEXS4	-0.519378	-0.448849	-0.459854	-0.464039	-0.463751	-0.399023	-0.429581	-0.419144	-0.366925	-0.454405	-0.492991	-0.489996	-0.436722	-0.35521	-0.381948	-0.406376	-0.325201			-0.135795	0.0245183	0.0091019	-0.000621141	-0.139575	0.0765814	-0.0242951	-0.124585	0.238415	0.0849148	-0.0060754	-0.108723	-0.186645	0.0752742	0.0639549	-0.199753
MEXS5	-0.280994	-0.276878	-0.2866	-0.279812	-0.295854	-0.283044	-0.276573	-0.272756	-0.260176	-0.281139	-0.278148	-0.258106	-0.252736	-0.252947	-0.238878	-0.250452	-0.234597			-0.0146484	0.0351116	-0.023683	0.0573291	-0.0432978	-0.0228608	-0.0138028	-0.0461206	0.0805737	-0.0106414	-0.0720557	-0.0208046	0.000836647	-0.0556211	0.0484504	-0.0633044
MEXS6	-0.329157	-0.34299	-0.335239	-0.32219	-0.342481	-0.321175	-0.309927	-0.312703	-0.293777	-0.319761	-0.331478	-0.297285	-0.290829	-0.317805	-0.301232	-0.303127	-0.283674			0.0420254	-0.0225996	-0.0389255	0.0629801	-0.0622107	-0.0350206	0.00895515	-0.0605238	0.0884481	0.0366444	-0.103153	-0.0217169	0.092756	-0.052149	0.00628894	-0.0641744
MEXS7	-0.557589	-0.559577	-0.574559	-0.573635	-0.556081	-0.543342	-0.535722	-0.533022	-0.490829	-0.561867	-0.603312	-0.563231	-0.616239	-0.605438	-0.566827	-0.528583	-0.44355			0.00356552	0.0267738	-0.00160778	-0.030602	-0.0229087	-0.0140247	-0.00503872	-0.079159	0.144731	0.0737631	-0.066434	0.0941137	-0.0175272	-0.0637736	-0.0674705	-0.160871
MEXS8	-0.0982808	-0.264508	-0.141225	-0.370068	-0.525686	-0.515115	-0.483408	-0.464984	-0.407683	-0.417488	-0.425552	-0.469395	-0.345356	-0.22098	0.0541015	0.139258	0.194169			1.69135	-0.466083	1.62041	0.420512	-0.020109	-0.0615531	-0.038113	-0.123232	0.0240498	0.0193142	0.103027	-0.264252	-0.36014	-1.24483	1.57401	0.394317
MEXS9	-0.708475	-0.698565	-0.705762	-0.715694	-0.726036	-0.729406	-0.718485	-0.726858	-0.701302	-0.751781	-0.778133	-0.769208	-0.739009	-0.743348	-0.714653	-0.710668	-0.665426			-0.013988	0.0103037	0.0140727	0.0144501	0.00464161	-0.0149729	0.0116531	-0.0351585	0.0719789	0.035052	-0.0114698	-0.0392599	0.00587169	-0.0386018	-0.0055759	-0.0636613
MEXS10	-0.565757	-0.563854	-0.550398	-0.559548	-0.574563	-0.616407	-0.576866	-0.591626	-0.588314	-0.612139	-0.643732	-0.605392	-0.57892	-0.577084	-0.580357	-0.553541	-0.50663			-0.00336405	-0.0238633	0.0166236	0.0268352	0.0728265	-0.0641475	0.0255864	-0.00559756	0.0404962	0.0516122	-0.0595591	-0.0437272	-0.00317082	0.00567041	-0.0462064	-0.0847467
MEXS11	-0.259099	-0.283385	-0.259406	-0.244313	-0.377553	-0.381795	-0.31813	-0.285025	-0.171744	-0.278275	-0.321801	-0.343488	-0.286398	-0.239181	-0.149706	-0.140796	-0.0928667			0.0937334	-0.084616	-0.0581832	0.545368	0.0112355	-0.166751	-0.104063	-0.39744	0.620288	0.156414	0.0673914	-0.166206	-0.164864	-0.374091	-0.0595189	-0.340415
MEXS12	-0.580229	-0.558644	-0.556883	-0.579246	-0.554709	-0.575675	-0.556141	-0.571045	-0.55128	-0.614264	-0.658857	-0.669232	-0.614308	-0.627878	-0.569793	-0.552702	-0.398577			-0.0372011	-0.00315218	0.0401569	-0.0423605	0.037796	-0.033932	0.0267997	-0.0346127	0.114251	0.0725951	0.0157478	-0.08207	0.0220891	-0.0925097	-0.0299954	-0.278857
MEXS13	-0.45211	-0.444418	-0.417829	-0.461953	-0.477157	-0.464657	-0.432005	-0.44152	-0.347158	-0.446212	-0.493023	-0.465256	-0.398543	-0.406793	-0.456471	-0.433676	-0.300009			-0.0170123	-0.0598306	0.105605	0.0329115	-0.0261977	-0.0702701	0.0220252	-0.213721	0.285329	0.104907	-0.0563208	-0.143389	0.0207002	0.122123	-0.0499383	-0.308218
MEXS14	-0.82043	-0.81452	-0.834336	-0.819558	-0.806261	-0.792937	-0.784389	-0.786838	-0.772742	-0.816128	-0.829101	-0.884872	-0.873489	-0.863108	-0.886801	-0.864084	-0.822755			-0.00720428	0.0243291	-0.0177128	-0.0162243	-0.0165254	-0.0107806	0.00312251	-0.0179152	0.0561454	0.0158962	0.0672668	-0.0128634	-0.0118845	0.0274508	-0.0256168	-0.0478298
MEXS15	-0.689795	-0.67741	-0.698435	-0.712727	-0.726897	-0.731517	-0.717636	-0.735119	-0.733267	-0.780508	-0.789807	-0.776394	-0.745697	-0.753273	-0.701257	-0.709926	-0.687639			-0.0179554	0.0310375	0.0204632	0.0198816	0.00635512	-0.0189755	0.0243623	-0.00251955	0.0644258	0.0119141	-0.0169831	-0.0395372	0.0101596	-0.0690537	0.0123621	-0.031393
MEXS16	-0.360809	-0.367876	-0.287912	-0.322748	-0.316559	-0.340677	-0.30566	-0.323598	-0.190754	-0.312656	-0.317694	-0.285652	-0.178019	-0.194633	-0.357239	-0.355602	-0.234515			0.0195867	-0.217366	0.120996	-0.0191774	0.076187	-0.102785	0.0586852	-0.41052	0.639049	0.0161151	-0.100859	-0.376799	0.0933274	0.835453	-0.00458394	-0.340513
MEXS17	-0.534688	-0.523055	-0.526298	-0.501667	-0.520197	-0.524861	-0.49148	-0.480265	-0.478553	-0.530777	-0.450819	-0.430205	-0.393926	-0.361627	-0.417207	-0.384248	-0.372003			-0.0217572	0.00619958	-0.0468005	0.0369381	0.00896449	-0.0635993	-0.0228188	-0.00356387	0.109128	-0.150642	-0.0457261	-0.0843292	-0.0819938	0.153695	-0.0789995	-0.0318668
MEXS18	-0.241504	-0.188302	-0.205019	-0.253002	-0.222031	-0.270931	-0.270343	-0.291598	-0.23987	-0.263953	-0.382623	-0.410836	-0.276091	-0.291351	-0.350058	-0.41576	-0.0010703			-0.220295	0.0887765	0.234047	-0.122416	0.220238	-0.00216971	0.0786218	-0.177394	0.100401	0.449586	0.0737354	-0.327976	0.0552721	0.201499	0.187689	-0.997426
MEXS19	-0.282253	-0.30254	-0.272247	-0.25463	-0.282514	-0.282307	-0.24127	-0.227035	-0.167133	-0.229656	-0.250712	-0.229945	-0.200079	-0.136778	-0.135915	-0.108952	-0.0941097			0.0718761	-0.100131	-0.0647095	0.109509	-0.000734224	-0.145362	-0.0589988	-0.263848	0.374096	0.0916862	-0.0828317	-0.129884	-0.316382	-0.00630474	-0.19838	-0.136231
MEXS20	-0.0396069	-0.0840632	-0.0338645	0.00183178	-0.0441061	-0.0502566	0.0462063	0.0749697	0.166462	0.0519235	0.00355405	-0.0136085	-0.00698086	0.137898	0.111097	0.0789334	0.163342			1.12244	-0.597154	-1.05409	-25.0782	0.139448	-1.91941	0.622502	1.22039	-0.688076	-0.931552	-4.82901	-0.487022	-20.7538	-0.194359	-0.289507	1.06937
MEXS21	-0.0999194	-0.138549	-0.0932141	-0.0640049	-0.107592	-0.113425	-0.0258551	-0.00226222	0.0977628	0.0445307	0.0125288	-0.012717	-0.0251283	0.0291829	0.10589	0.0323163	0.124461			0.386605	-0.32721	-0.313357	0.680999	0.0542149	-0.772051	-0.912504	-44.2155	-0.544502	-0.718648	-2.01502	0.975963	-2.16136	2.62849	-0.694812	2.85132
MEXS22	-0.270285	-0.298186	-0.326266	-0.315473	-0.352993	-0.329024	-0.325883	-0.332422	-0.312395	-0.344258	-0.34523	-0.353426	-0.333255	-0.373862	-0.347331	-0.375616	-0.365509			0.103227	0.0941678	-0.0330807	0.118934	-0.0679025	-0.00954747	0.0200661	-0.0602443	0.101995	0.00282177	0.0237419	-0.057072	0.121848	-0.0709643	0.0814361	-0.0269084
MEXS23	-0.167824	-0.278769	-0.207416	-0.360936	-0.476346	-0.478408	-0.445153	-0.449404	-0.393409	-0.480717	-0.522934	-0.521604	-0.448484	-0.343502	-0.423675	-0.43679	-0.53093			0.661078	-0.255958	0.740158	0.319753	0.0043292	-0.0695136	0.00954975	-0.124597	0.221925	0.0878219	-0.00254365	-0.140184	-0.234082	0.2334	0.0309562	0.215526
MEXS24	-0.248558	-0.22356	-0.22169	-0.212627	-0.231614	-0.215076	-0.201855	-0.196299	-0.175123	-0.194874	-0.189714	-0.184477	-0.178556	-0.176018	-0.161614	-0.152688	-0.145012			-0.100573	-0.00836349	-0.0408802	0.0892961	-0.071403	-0.0614705	-0.0275277	-0.107875	0.112784	-0.0264802	-0.0276038	-0.0320979	-0.0142137	-0.0818329	-0.0552314	-0.0502723
MEXS25	-0.380054	-0.45357	-0.370984	-0.44917	-0.502402	-0.498954	-0.475263	-0.473279	-0.279672	-0.362097	-0.456586	-0.464388	-0.397143	-0.372881	-0.172007	-0.0956413	0.105715			0.193436	-0.18208	0.210753	0.118512	-0.00686239	-0.0474818	-0.00417429	-0.409075	0.294719	0.26095	0.0170888	-0.144803	-0.0610914	-0.53871	-0.443967	-2.10532
MEXS26	-0.291072	-0.305826	-0.279638	-0.265905	-0.293379	-0.291672	-0.258989	-0.245028	-0.192271	-0.199478	-0.221059	-0.17489	-0.144347	-0.0707709	-0.110142	-0.210106	-0.121317			0.0506917	-0.0856324	-0.049111	0.103326	-0.00582031	-0.112054	-0.053905	-0.215312	0.0374879	0.108184	-0.208851	-0.174644	-0.509717	0.556322	0.907589	-0.42259
MEXS27	-0.324148	-0.310253	-0.389548	-0.343378	-0.305828	-0.262926	-0.221135	-0.22256	-0.149485	-0.342399	-0.408875	-0.208375	-0.164239	-0.0359566	-0.187504	-0.0296852	-0.0191146			-0.0428652	0.255582	-0.118523	-0.109355	-0.140279	-0.158946	0.00644156	-0.328336	1.29052	0.194149	-0.490371	-0.211809	-0.781072	4.21474	-0.841682	-0.35609
MEXS28	-0.112604	-0.137387	-0.0694141	-0.0482854	-0.0758126	-0.0663294	-0.0274235	-0.0043902	0.035117	-0.138075	-0.25968	0.0378266	0.0268065	0.0759	0.0969578	0.123021	0.0842198			0.220089	-0.494754	-0.304387	0.570095	-0.125087	-0.586556	-0.839911	-8.99896	-4.93185	0.880715	-1.14567	-0.291332	1.8314	0.277441	0.268814	-0.315405
MEXS29																				#DIV/0!	#DIV/0!	#DIV/0!	#DIV/0!	#DIV/0!	#DIV/0!	#DIV/0!	#DIV/0!	#DIV/0!	#DIV/0!	#DIV/0!	#DIV/0!	#DIV/0!	#DIV/0!	#DIV/0!	#DIV/0!
MEXS30	-0.328355	-0.348555	-0.30382	-0.289339	-0.328451	-0.332584	-0.264361	-0.248237	-0.189097	-0.227196	-0.256603	-0.236562	-0.161852	-0.100378	-0.0678668	-0.0540435	-0.0169538			0.0615187	-0.128345	-0.0476626	0.135179	0.0125819	-0.20513	-0.0609943	-0.23824	0.201479	0.129435	-0.0781013	-0.315814	-0.379816	-0.323889	-0.203682	-0.686293
MEXS31	-0.258659	-0.2442	-0.181355	-0.0424025	-0.268728	-0.277281	-0.175957	-0.13219	-0.0470556	-0.107153	-0.120924	-0.154489	-0.0560818	0.0093804	-0.113241	-0.18103	-0.214098			-0.0559009	-0.25735	-0.766191	5.33756	0.0318278	-0.36542	-0.248739	-0.64403	1.27715	0.128516	0.277579	-0.636986	-1.16726	-13.072	0.598635	0.182664
MEXS32	-0.283436	-0.302228	-0.269059	-0.256175	-0.283388	-0.283107	-0.246527	-0.23222	-0.175416	-0.211926	-0.257726	-0.226559	-0.192603	-0.0883577	-0.251708	-0.331299	-0.119678			0.066303	-0.10975	-0.0478864	0.106229	-0.000989717	-0.129211	-0.0580325	-0.244612	0.208132	0.216113	-0.120931	-0.14988	-0.541244	1.84873	0.316207	-0.638763
MEXS33	-0.420903	-0.417212	-0.389628	-0.301393	-0.23524	-0.236765	-0.170247	-0.148881	-0.0843106	-0.0724488	-0.110005	-0.0876978	-0.0202204	0.123593	-0.245563	-0.308797	-0.0808487			-0.00876987	-0.0661145	-0.226459	-0.219492	0.00648521	-0.280945	-0.125504	-0.433704	-0.140692	0.518389	-0.202786	-0.769431	-7.11231	-2.98686	0.257506	-0.738181
MEXS34	-0.234091	-0.259799	-0.209188	-0.194691	-0.233629	-0.234339	-0.182541	-0.166709	-0.068139	-0.189803	-0.239221	-0.170115	-0.128912	0.0885654	0.0979429	0.0951716	0.121947			0.109821	-0.194806	-0.069302	0.2	0.0030381	-0.22104	-0.086728	-0.591271	1.78553	0.260363	-0.288881	-0.242204	-1.68702	0.105883	-0.0282955	0.281343
MEXS35																				#DIV/0!	#DIV/0!	#DIV/0!	#DIV/0!	#DIV/0!	#DIV/0!	#DIV/0!	#DIV/0!	#DIV/0!	#DIV/0!	#DIV/0!	#DIV/0!	#DIV/0!	#DIV/0!	#DIV/0!	#DIV/0!
MLTS1	-0.239199	-0.307417	-0.292436	-0.333645	-0.30191	-0.306595	-0.357975	-0.210354	-0.272693	-0.292259	-0.163621	-0.164626	-0.221888	-0.0894245	-0.245714	-0.320403	-0.230924			0.285193	-0.0487308	0.140915	-0.0951152	0.0155168	0.167583	-0.412378	0.296351	0.0717517	-0.440152	0.00614504	0.347831	-0.596983	1.74773	0.303967	-0.279272
MLTS2	-0.315791	-0.263668	-0.330775	-0.393919	-0.383237	-0.367002	-0.342488	-0.332848	-0.309119	-0.272207	-0.261978	-0.159426	-0.26591	-0.162278	-0.200416	-0.19427	-0.231708			-0.165053	0.254511	0.190896	-0.0271165	-0.0423632	-0.0667954	-0.0281465	-0.0712921	-0.11941	-0.0375782	-0.391452	0.667919	-0.389724	0.235012	-0.0306647	0.192711
MLTS3	-0.313018	-0.408116	-0.334113	-0.379969	-0.355649	-0.384494	-0.435953	-0.239392	-0.321547	-0.357312	-0.22982	-0.225213	-0.291087	-0.0263296	-0.334889	-0.454673	-0.322894			0.30381	-0.181329	0.137247	-0.0640048	0.0811038	0.133836	-0.450877	0.343186	0.111226	-0.356807	-0.0200469	0.292495	-0.909547	11.7191	0.357682	-0.289833
MLTS4	-0.537137	-0.498268	-0.451584	-0.481144	-0.451764	-0.445024	-0.391801	-0.325029	-0.174784	-0.1614	-0.172673	-0.273834	-0.23581	-0.202802	-0.201096	-0.174076	-0.154938			-0.072362	-0.0936939	0.0654583	-0.0610628	-0.0149181	-0.119597	-0.170423	-0.462249	-0.0765747	0.0698445	0.585852	-0.138857	-0.139978	-0.00841334	-0.134364	-0.109937
MLTS5	-0.207129	-0.176539	-0.0933411	-0.093977	-0.148136	-0.149213	-0.130548	-0.107616	-0.0908675	-0.0913436	-0.0980924	-0.104398	-0.0766944	-0.0660238	-0.0547085	-0.0467881	-0.0538552			-0.147682	-0.471273	0.00681252	0.576301	0.00726964	-0.125091	-0.175661	-0.15563	0.00523969	0.073884	0.0642787	-0.265362	-0.139132	-0.171382	-0.144774	0.151045
MLTS6	-0.14493	-0.144522	-0.179464	-0.175466	-0.134038	-0.126787	-0.128113	-0.107389	-0.116917	-0.118092	-0.11547	-0.068454	-0.0503427	-0.0398384	-0.0645119	-0.0808333	-0.0672218			-0.00281317	0.241772	-0.0222776	-0.2361	-0.0540977	0.0104543	-0.16176	0.0887223	0.0100459	-0.022198	-0.407172	-0.264576	-0.208656	0.619339	0.252998	-0.168389
MLTS7	-0.61017	-0.656198	-0.641792	-0.486595	-0.55229	-0.564805	-0.502691	-0.449371	-0.46105	-0.409034	-0.496652	-0.327025	-0.309165	-0.313666	-0.335066	-0.32005	-0.334821			0.0754348	-0.0219544	-0.241818	0.135009	0.0226606	-0.109974	-0.106069	0.0259886	-0.11282	0.214206	-0.341541	-0.0546123	0.0145567	0.0682277	-0.044817	0.0461532
MLTS8	-0.764456	-0.789835	-0.683498	-0.74489	-0.713886	-0.738929	-0.740847	-0.661492	-0.66605	-0.654741	-0.688156	-0.332793	-0.326903	-0.514811	-0.353518	-0.410651	-0.253061			0.0331986	-0.134632	0.0898205	-0.041623	0.0350809	0.00259496	-0.107114	0.00689026	-0.0169784	0.051034	-0.516399	-0.0176973	0.574812	-0.313305	0.161612	-0.383755
MLTS9	-0.744724	-0.573196	-0.380479	-0.599561	-0.495796	-0.338442	-0.268469	-0.270227	-0.300376	-0.311839	-0.432085	-0.261248	-0.244608	-0.418065	-0.368404	-0.447496	-0.290939			-0.230324	-0.336215	0.575804	-0.173067	-0.317376	-0.20675	0.00654489	0.111572	0.0381603	0.385604	-0.395378	-0.0636947	0.709122	-0.118787	0.214687	-0.34985
MLTS10	-0.342073	-0.284369	-0.319816	-0.373538	-0.384449	-0.344514	-0.29139	-0.30949	-0.363866	-0.36038	-0.335893	-0.278963	-0.233927	-0.251319	-0.306578	-0.327982	-0.254327			-0.168689	0.124653	0.167975	0.0292101	-0.103874	-0.154201	0.0621175	0.175694	-0.00958046	-0.067948	-0.169489	-0.161438	0.0743454	0.219879	0.0698128	-0.224569
MLTS11	-0.339998	-0.364914	-0.382859	-0.353263	-0.369045	-0.335261	-0.319111	-0.282212	-0.318849	-0.297643	-0.403176	-0.336806	-0.2823	-0.247405	-0.253932	-0.30639	-0.237328			0.0732819	0.0491768	-0.0773026	0.0446756	-0.0915449	-0.0481713	-0.115632	0.129822	-0.0665078	0.354561	-0.164617	-0.161833	-0.123608	0.0263832	0.20658	-0.225405
MLTS12	-0.492098	-0.515452	-0.473284	-0.510204	-0.581787	-0.517225	-0.461575	-0.459989	-0.405787	-0.596839	-0.313115	-0.32153	-0.308525	-0.300226	-0.354417	-0.335562	-0.321849			0.0474582	-0.0818068	0.0780071	0.140304	-0.110973	-0.107593	-0.00343694	-0.117832	0.470818	-0.475378	0.0268749	-0.040447	-0.0269002	0.180501	-0.0531997	-0.0408665
MLTS13	-0.859111	-0.767872	-0.754682	-0.811686	-0.763602	-0.727698	-0.682124	-0.627205	-0.670737	-0.58647	-0.596446	-0.715349	-0.634742	-0.424165	-0.435546	-0.532894	-0.546895			-0.106202	-0.0171775	0.0755338	-0.0592401	-0.0470194	-0.0626277	-0.0805107	0.0694061	-0.125634	0.0170107	0.199353	-0.112682	-0.331753	0.0268335	0.223507	0.0262736
MLTS14	-0.76692	-0.698877	-0.72291	-0.785251	-0.719953	-0.615202	-0.594402	-0.518136	-0.519874	-0.488943	-0.501278	-0.409334	-0.432007	-0.280896	-0.454967	-0.506623	-0.389391			-0.0887227	0.0343881	0.086236	-0.0831563	-0.145496	-0.0338111	-0.128307	0.00335368	-0.0594975	0.0252283	-0.183419	0.0553899	-0.349789	0.619699	0.113539	-0.231399
MLTS15	-0.524366	-0.434222	-0.4999	-0.590021	-0.529052	-0.414582	-0.477452	-0.444371	-0.45842	-0.391919	-0.396807	-0.401887	-0.262278	-0.291414	-0.32916	-0.328914	-0.25071			-0.171911	0.151253	0.18028	-0.103333	-0.216369	0.151649	-0.0692873	0.0316152	-0.145067	0.012472	0.0128041	-0.347385	0.11109	0.129528	-0.000748089	-0.237764
MLTS16	-0.354357	-0.328168	-0.305992	-0.365066	-0.308644	-0.376667	-0.386344	-0.273405	-0.443289	-0.335369	-0.415395	-0.317677	-0.307532	-0.31243	-0.317147	-0.299439	-0.312002			-0.0739068	-0.0675736	0.193057	-0.154552	0.220392	0.0256896	-0.292326	0.621362	-0.243453	0.238622	-0.235242	-0.031932	0.015925	0.0150992	-0.0558374	0.0419566
MLTS17	-0.821341	-0.826873	-0.79911	-0.841545	-0.824517	-0.814706	-0.758855	-0.71504	-0.398889	-0.364449	-0.346955	-0.637695	-0.562135	-0.396982	-0.473734	-0.461724	-0.531191			0.00673603	-0.0335762	0.0531034	-0.0202348	-0.0118989	-0.0685535	-0.0577379	-0.442145	-0.0863406	-0.0480014	0.83798	-0.118491	-0.293796	0.193341	-0.0253535	0.150453
MLTS18	-0.510705	-0.55254	-0.527432	-0.491844	-0.484942	-0.406942	-0.426818	-0.349804	-0.387206	-0.340999	-0.53286	-0.443747	-0.326489	-0.260834	-0.294817	-0.406648	-0.243557			0.0819155	-0.0454407	-0.0674743	-0.0140324	-0.160844	0.048842	-0.180439	0.106925	-0.119336	0.562644	-0.167236	-0.264244	-0.201095	0.130286	0.379323	-0.401062
MLTS19	-0.260012	-0.294823	-0.305488	-0.355265	-0.27077	-0.244055	-0.241201	-0.247503	-0.272901	-0.287875	-0.301444	-0.280608	-0.254761	-0.196338	-0.2203	-0.245637	-0.298973			0.133881	0.0361739	0.162942	-0.237836	-0.0986631	-0.0116955	0.026128	0.102618	0.0548709	0.0471334	-0.069119	-0.0921121	-0.229324	0.122043	0.115013	0.217129
MLTS20	-0.445248	-0.391818	-0.47596	-0.505068	-0.479298	-0.508906	-0.698137	-0.536985	-0.579135	-0.624784	-0.472861	-0.442859	-0.475415	-0.340706	-0.377293	-0.372352	-0.503621			-0.120001	0.214747	0.0611569	-0.0510227	0.0617742	0.371838	-0.230831	0.0784931	0.078823	-0.24316	-0.0634474	0.0735116	-0.28335	0.107385	-0.0130937	0.352538
MLTS21	-0.532985	-0.557441	-0.539311	-0.609157	-0.550804	-0.562265	-0.505648	-0.435549	-0.490005	-0.46155	-0.446152	-0.442056	-0.402038	-0.409585	-0.454812	-0.45266	-0.458437			0.0458844	-0.0325226	0.129509	-0.0957937	0.0208079	-0.100695	-0.138631	0.125028	-0.0580714	-0.0333612	-0.00918035	-0.0905272	0.01877	0.110423	-0.00473157	0.0127621
MLTS22	-0.441872	-0.490222	-0.397378	-0.501815	-0.45854	-0.469059	-0.340556	-0.260636	-0.365327	-0.34942	-0.358473	-0.24654	-0.179532	-0.304202	-0.337499	-0.262893	-0.211365			0.109421	-0.189392	0.262815	-0.0862362	0.0229392	-0.273959	-0.234676	0.401675	-0.0435416	0.0259089	-0.312249	-0.271793	0.694415	0.109457	-0.221054	-0.196004
MLTS23	-0.328066	-0.386911	-0.646294	-0.651224	-0.371691	-0.384	-0.337101	-0.446431	-0.520545	-0.528506	-0.54382	-0.240647	-0.225114	-0.22621	-0.187981	-0.237593	-0.278551			0.179369	0.670395	0.00762815	-0.429242	0.0331162	-0.122133	0.324325	0.166014	0.0152935	0.0289764	-0.557488	-0.0645466	0.00486944	-0.169	0.263921	0.172388
MLTS24	-0.365197	-0.431346	-0.374035	-0.40309	-0.391411	-0.395767	-0.339901	-0.271384	-0.329435	-0.366912	-0.373477	-0.176917	-0.175937	-0.172596	-0.171765	-0.16497	-0.204698			0.18113	-0.132865	0.0776799	-0.0289727	0.0111294	-0.141158	-0.20158	0.213906	0.113762	0.017894	-0.526297	-0.00553979	-0.0189934	-0.00481277	-0.039558	0.240816
MLTS25	-0.353088	-0.404278	-0.29329	-0.352855	-0.394752	-0.375997	-0.381463	-0.307255	-0.403484	-0.371352	-0.380233	-0.223415	-0.2158	-0.200622	-0.145418	-0.219513	-0.247005			0.144977	-0.274533	0.203092	0.118737	-0.0475128	0.0145386	-0.194535	0.313188	-0.0796364	0.0239163	-0.412427	-0.0340838	-0.0703358	-0.275161	0.509531	0.125237
MLTS26	-0.484141	-0.572479	-0.423124	-0.454596	-0.51168	-0.518583	-0.435964	-0.342656	-0.434764	-0.466173	-0.473716	-0.312233	-0.191607	-0.233934	-0.216074	-0.302823	-0.387983			0.182464	-0.260892	0.0743807	0.125571	0.0134921	-0.159318	-0.214027	0.268806	0.0722429	0.0161823	-0.340885	-0.386334	0.220905	-0.0763466	0.401476	0.281223
MLTS27	-0.597095	-0.567141	-0.602166	-0.696982	-0.654055	-0.588739	-0.563887	-0.655591	-0.686222	-0.690352	-0.685942	-0.721641	-0.628353	-0.503803	-0.72082	-0.702032	-0.799095			-0.0501657	0.0617569	0.157459	-0.0615907	-0.0998633	-0.0422123	0.162629	0.0467237	0.00601747	-0.00638781	0.0520446	-0.129272	-0.198217	0.430758	-0.0260649	0.13826
MLTS28	-0.967604	-0.96616	-0.95378	-0.97876	-0.978768	-0.973343	-0.959192	-0.975697	-0.97729	-0.975023	-0.975543	-0.925932	-0.940209	-0.914482	-0.911344	-0.919167	-0.93729			-0.00149178	-0.0128142	0.0261909	7.91537e-06	-0.00554214	-0.0145388	0.0172076	0.00163276	-0.00232023	0.000533174	-0.0508545	0.0154187	-0.0273629	-0.00343186	0.00858497	0.0197159
MLTS29	-0.326279	-0.477179	-0.464927	-0.375633	-0.4699	-0.433808	-0.443479	-0.492184	-0.51999	-0.499288	-0.50414	-0.582199	-0.50967	-0.511389	-0.634157	-0.605412	-0.617225			0.462486	-0.0256746	-0.192062	0.250955	-0.0768072	0.0222925	0.109825	0.056495	-0.0398119	0.00971829	0.154836	-0.124578	0.00337269	0.240069	-0.0453289	0.0195131
MLTS30	-0.760384	-0.778494	-0.771422	-0.821914	-0.815347	-0.812446	-0.816353	-0.822472	-0.846437	-0.847537	-0.834434	-0.753304	-0.776068	-0.711053	-0.719445	-0.684867	-0.707604			0.0238174	-0.00908431	0.0654532	-0.00798975	-0.0035582	0.00480873	0.0074954	0.0291382	0.00129951	-0.0154598	-0.0972281	0.0302195	-0.0837753	0.0118018	-0.0480615	0.0331994
MLTS31	-0.537236	-0.538486	-0.505253	-0.580126	-0.590013	-0.587823	-0.567974	-0.581693	-0.620217	-0.628814	-0.62976	-0.485568	-0.392247	-0.444488	-0.554557	-0.549041	-0.623144			0.002327	-0.0617163	0.148189	0.0170438	-0.00371197	-0.0337667	0.0241538	0.0662262	0.0138625	0.00150452	-0.228964	-0.192188	0.133182	0.247631	-0.00994678	0.134969
MLTS32	-0.340807	-0.355743	-0.37794	-0.352035	-0.341404	-0.320934	-0.314341	-0.276925	-0.328003	-0.333252	-0.346873	-0.306378	-0.331914	-0.307982	-0.288875	-0.281184	-0.318716			0.0438255	0.0623946	-0.0685427	-0.0301977	-0.0599592	-0.0205417	-0.119029	0.184446	0.0160038	0.0408715	-0.116742	0.0833479	-0.0721018	-0.0620398	-0.0266243	0.133476
MLTS33	-0.571022	-0.597103	-0.608375	-0.646201	-0.650102	-0.657227	-0.674722	-0.680631	-0.690404	-0.660599	-0.667164	-0.556473	-0.507587	-0.617166	-0.628643	-0.612104	-0.633256			0.045674	0.018878	0.0621753	0.0060368	0.0109597	0.0266195	0.00875798	0.0143591	-0.0431707	0.0099382	-0.165913	-0.0878497	0.215883	0.0185966	-0.0263099	0.0345568
MLTS34	-0.765685	-0.823523	-0.735761	-0.768908	-0.819345	-0.82312	-0.83937	-0.841343	-0.848991	-0.836599	-0.819453	-0.833078	-0.672152	-0.658231	-0.873233	-0.832959	-0.932048			0.0755385	-0.10657	0.0450515	0.0655965	0.00460682	0.0197423	0.00234956	0.00909109	-0.0145968	-0.0204947	0.0166271	-0.19317	-0.0207106	0.326635	-0.046121	0.118961
MLTS35		-0.00922165			-0.014239	-0.014684		-0.015328												#DIV/0!	-1	#DIV/0!	#DIV/0!	0.0312515	-1	#DIV/0!	-1	#DIV/0!	#DIV/0!	#DIV/0!	#DIV/0!	#DIV/0!	#DIV/0!	#DIV/0!	#DIV/0!
NETS1	0.0442928	-0.00135596	-0.115086	-0.293586	-0.240983	-0.381189	-0.408567	-0.335679	-0.38829	-0.475964	-0.503414	-0.382745	-0.450545	-0.454562	-0.429332	-0.452494	-0.363246			-1.03061	83.8742	1.55102	-0.179174	0.581808	0.0718225	-0.1784	0.156732	0.225795	0.0576726	-0.239701	0.17714	0.00891636	-0.0555037	0.05395	-0.197236
NETS2	-0.113244	-0.28771	-0.141019	-0.161619	-0.206078	-0.25357	-0.265317	-0.282355	-0.286165	-0.27583	-0.293153	-0.189539	-0.253625	-0.270824	-0.253796	-0.270469	-0.244235			1.54063	-0.509859	0.14608	0.275089	0.230456	0.0463264	0.0642197	0.0134922	-0.0361145	0.0628016	-0.353446	0.338115	0.0678102	-0.0628754	0.0656963	-0.0969958
NETS3	0.250757	-0.0749836	-0.15074	-0.369953	-0.268403	-0.481264	-0.45983	-0.370771	-0.445123	-0.586364	-0.619286	-0.519673	-0.571552	-0.603652	-0.600189	-0.640819	-0.588003			-1.29903	1.0103	1.45425	-0.274495	0.793064	-0.0445371	-0.193677	0.200531	0.317309	0.0561459	-0.160852	0.09983	0.0561639	-0.00573712	0.0676953	-0.0824193
NETS4	-0.116009	-0.130213	-0.150534	-0.139456	-0.157896	-0.168154	-0.148612	-0.162296	-0.156579	-0.154592	-0.162071	-0.131955	-0.147984	-0.149607	-0.147772	-0.161692	-0.175178			0.122444	0.156055	-0.0735931	0.132234	0.0649629	-0.116213	0.0920777	-0.0352235	-0.0126897	0.0483778	-0.18582	0.121471	0.0109644	-0.0122596	0.0941943	0.0834072
NETS5	-0.0724897	-0.0766995	-0.0701846	-0.109696	-0.126847	-0.124063	-0.132403	-0.152439	-0.148901	-0.10811	-0.0802712	-0.0674559	-0.0901283	-0.091017	-0.0732248	-0.0726078	-0.0791609			0.0580751	-0.0849407	0.562966	0.15635	-0.0219531	0.0672262	0.151331	-0.0232143	-0.273948	-0.257502	-0.15965	0.336106	0.00986037	-0.195482	-0.00842595	0.0902527
NETS6	-0.124013	-0.129578	-0.133677	-0.130327	-0.146386	-0.146243	-0.129492	-0.142221	-0.142324	-0.142834	-0.174542	-0.116648	-0.141214	-0.14831	-0.144177	-0.155132	-0.158404			0.0448698	0.0316346	-0.0250605	0.123222	-0.000975316	-0.114542	0.0982978	0.000721728	0.0035839	0.221992	-0.331689	0.2106	0.0502462	-0.0278655	0.0759837	0.0210877
NETS7	-0.12266	-0.163512	-0.23115	-0.232798	-0.302503	-0.351777	-0.333565	-0.344537	-0.344562	-0.339964	-0.383904	-0.193122	-0.261268	-0.28134	-0.261374	-0.290971	-0.309513			0.333044	0.41366	0.00712976	0.299423	0.162888	-0.0517735	0.0328945	7.39099e-05	-0.0133464	0.129249	-0.496951	0.352859	0.076829	-0.07097	0.113237	0.063724
NETS8	-0.725469	-0.756888	-0.699286	-0.78878	-0.841965	-0.859259	-0.496347	-0.295311	-0.178874	-0.26136	-0.336192	-0.238374	-0.263438	-0.2113	-0.396344	-0.704426	-0.575002			0.0433082	-0.0761035	0.127979	0.0674272	0.02054	-0.422354	-0.405031	-0.394287	0.461139	0.286318	-0.290957	0.105144	-0.197915	0.875745	0.777309	-0.18373
NETS9	-0.15937	-0.197808	-0.355966	-0.498348	-0.505731	-0.509193	-0.519359	-0.509836	-0.527791	-0.525422	-0.549657	-0.497916	-0.55051	-0.460826	-0.511046	-0.468059	-0.415166			0.24119	0.799552	0.399986	0.0148141	0.00684699	0.0199645	-0.0183365	0.0352185	-0.00448886	0.0461248	-0.0941329	0.105628	-0.16291	0.108976	-0.0841148	-0.113005
NETS10	-0.117358	-0.133389	-0.159052	-0.289277	-0.277819	-0.295013	-0.229686	-0.239852	-0.251794	-0.241981	-0.25082	-0.161698	-0.21715	-0.228563	-0.220909	-0.230639	-0.256777			0.136603	0.192391	0.818754	-0.0396094	0.0618905	-0.221439	0.044262	0.0497881	-0.0389711	0.0365263	-0.355323	0.342936	0.0525606	-0.0334871	0.0440408	0.113332
NETS11	-0.147612	-0.161455	-0.182845	-0.170629	-0.197164	-0.220065	-0.200898	-0.21455	-0.212573	-0.214575	-0.183806	-0.138621	-0.185844	-0.195368	-0.173933	-0.195678	-0.214139			0.0937766	0.132485	-0.0668084	0.155509	0.116155	-0.0870993	0.067957	-0.00921519	0.0094176	-0.143395	-0.245829	0.340658	0.0512489	-0.109717	0.125023	0.0943444
NETS12	-0.108336	-0.172029	-0.207145	-0.222273	-0.259698	-0.333189	-0.410118	-0.407881	-0.409833	-0.407154	-0.505774	-0.479939	-0.531213	-0.448853	-0.323986	-0.45144	-0.322352			0.587919	0.204127	0.0730337	0.168372	0.282987	0.230887	-0.005454	0.00478461	-0.00653618	0.242218	-0.0510805	0.106835	-0.155042	-0.278192	0.393396	-0.285948
NETS13	0.0153222	-0.0475959	-0.165246	-0.163234	-0.245018	-0.330184	-0.326535	-0.342786	-0.361246	-0.356332	-0.523323	-0.428628	-0.506952	-0.404855	-0.393261	-0.403448	-0.399087			-4.10633	2.47185	-0.0121779	0.501027	0.34759	-0.0110493	0.0497656	0.0538548	-0.0136041	0.468639	-0.180949	0.182734	-0.201395	-0.0286368	0.0259024	-0.0108079
NETS14	0.062299	0.000927083	-0.190667	-0.500105	-0.566194	-0.590033	-0.646845	-0.680326	-0.713642	-0.717611	-0.744489	-0.0397989	-0.211034	-0.221768	-0.220264	-0.296695	-0.311727			-0.985119	-206.663	1.62292	0.13215	0.0421042	0.0962873	0.0517606	0.0489704	0.00556053	0.0374554	-0.946542	4.30252	0.0508634	-0.00678322	0.346995	0.0506677
NETS15	-0.0690934	-0.105023	-0.16505	-0.174586	-0.227461	-0.291788	-0.224786	-0.33336	-0.425118	-0.408586	-0.374847	-0.126312	-0.241852	-0.269371	-0.257231	-0.299665	-0.324458			0.520014	0.571563	0.0577779	0.302854	0.282805	-0.229623	0.483008	0.275251	-0.0388868	-0.0825751	-0.663031	0.914718	0.113788	-0.0450689	0.164965	0.0827348
NETS16	-0.139057	-0.157667	-0.176588	-0.118916	-0.14923	-0.18967	-0.157979	-0.172867	-0.178836	-0.178675	-0.19832	-0.103316	-0.184219	-0.196651	-0.184296	-0.211137	-0.218292			0.133826	0.12001	-0.326592	0.254916	0.270998	-0.167085	0.0942374	0.0345308	-0.000902952	0.109952	-0.479045	0.783061	0.0674853	-0.062828	0.145641	0.0338891
NETS17	-0.131335	-0.380163	-0.203853	-0.232708	-0.301438	-0.359906	-0.375252	-0.387871	-0.39534	-0.385704	-0.404966	-0.170106	-0.248553	-0.26146	-0.22642	-0.274092	-0.308193			1.89461	-0.463774	0.141549	0.295348	0.193961	0.0426412	0.033626	0.019258	-0.0243742	0.0499388	-0.579951	0.461171	0.0519266	-0.134018	0.210548	0.124416
NETS18	0.198612	0.144741	0.0378278	0.00459661	-0.14052	-0.267244	-0.292068	-0.310501	-0.33743	-0.323431	-0.581373	-0.0835585	-0.224741	-0.236379	-0.319198	-0.417755	-0.316328			-0.271237	-0.738653	-0.878486	-31.5703	0.901825	0.0928873	0.0631133	0.0867264	-0.0414868	0.797519	-0.856274	1.68963	0.051784	0.350364	0.308766	-0.242791
NETS19	-0.131899	-0.165514	-0.229845	-0.229492	-0.28929	-0.331965	-0.302432	-0.31766	-0.317931	-0.314059	-0.265903	-0.14712	-0.216159	-0.243505	-0.247701	-0.27541	-0.302366			0.254851	0.388674	-0.00153496	0.26057	0.147517	-0.0889642	0.0503515	0.00085278	-0.0121779	-0.153336	-0.446714	0.469271	0.126506	0.0172304	0.111867	0.0978769
NETS20	0.127095	0.0584739	-0.0808149	-0.0624475	-0.223164	-0.332462	-0.409506	-0.418063	-0.437644	-0.422292	-0.508655	-0.0241307	-0.16089	-0.122361	-0.0776126	-0.237673	-0.228015			-0.53992	-2.38207	-0.227278	2.57362	0.489766	0.231737	0.0208978	0.0468356	-0.0350784	0.204511	-0.95256	5.66743	-0.239472	-0.365708	2.0623	-0.0406356
NETS21	0.0612918	-0.000271355	-0.0321643	0.0181164	-0.117201	-0.229566	-0.200642	-0.221195	-0.235855	-0.219533	-0.256487	0.170695	-0.0359279	-0.035787	-0.0334585	-0.139955	-0.175153			-1.00443	117.532	-1.56324	-7.46931	0.958747	-0.125994	0.102432	0.0662795	-0.0692032	0.168327	-1.66551	-1.21048	-0.00392267	-0.0650659	3.18296	0.251491
NETS22	-0.0148074	-0.0840846	-0.0850283	-0.232367	-0.190128	-0.278239	-0.397986	-0.32728	-0.371352	-0.456028	-0.375254	-0.244356	-0.292875	-0.291828	-0.266255	-0.283297	-0.270165			4.67855	0.0112225	1.73282	-0.181778	0.463429	0.430376	-0.177658	0.134659	0.228024	-0.177127	-0.348826	0.198561	-0.00357368	-0.0876327	0.064006	-0.0463517
NETS23	-0.0836522	-0.127974	-0.213194	-0.202654	-0.276271	-0.328894	-0.326619	-0.351714	-0.351022	-0.346101	-0.335044	-0.151274	-0.250132	-0.280547	-0.262146	-0.319179	-0.327492			0.529831	0.665921	-0.0494399	0.363269	0.190474	-0.00691816	0.0768331	-0.00196755	-0.0140181	-0.0319472	-0.548497	0.653506	0.121595	-0.0655886	0.217564	0.0260422
NETS24	-0.121562	-0.140576	-0.191372	-0.200776	-0.240314	-0.274793	-0.246076	-0.282225	-0.280134	-0.278902	-0.346661	-0.138674	-0.208396	-0.259587	-0.252902	-0.26642	-0.290446			0.156411	0.361342	0.0491437	0.196923	0.143475	-0.104503	0.146902	-0.00741107	-0.00439856	0.242951	-0.599972	0.502775	0.245642	-0.025752	0.0534532	0.0901822
NETS25	-0.0990207	-0.12238	-0.164657	-0.146938	-0.198981	-0.236649	-0.199125	-0.201645	-0.244679	-0.245021	-0.31315	-0.122885	-0.203011	-0.184822	-0.224244	-0.245771	-0.18223			0.235902	0.345458	-0.107609	0.35418	0.189302	-0.158561	0.0126553	0.213412	0.00139805	0.278053	-0.607585	0.652041	-0.089592	0.213292	0.0960012	-0.25854
NETS26	-0.0912556	-0.132362	-0.229699	-0.221423	-0.294846	-0.351579	-0.359174	-0.3787	-0.387394	-0.379052	-0.370748	-0.0931513	-0.236768	-0.26195	-0.228179	-0.302411	-0.302302			0.450449	0.735394	-0.0360298	0.331592	0.192418	0.0216008	0.0543656	0.0229552	-0.0215317	-0.0219069	-0.748748	1.54176	0.106358	-0.128921	0.325323	-0.000359008
NETS27	-0.0707453	-0.126795	-0.223529	-0.231895	-0.308563	-0.366266	-0.347789	-0.36279	-0.370987	-0.365846	-0.538805	-0.196292	-0.269384	-0.285938	-0.272442	-0.313018	-0.315567			0.792275	0.762919	0.0374282	0.330612	0.187008	-0.050448	0.0431335	0.0225929	-0.0138579	0.472765	-0.635691	0.372368	0.061449	-0.0471981	0.148935	0.00814331
NETS28	-0.150618	-0.0891294	-0.150501	-0.13194	-0.272678	-0.375761	-0.429018	-0.435661	-0.451689	-0.438845	-0.507288	-0.111288	-0.226987	-0.192693	-0.157905	-0.292816	-0.276762			-0.408243	0.688566	-0.123327	1.06668	0.378037	0.141732	0.0154831	0.0367895	-0.0284343	0.155962	-0.780621	1.03963	-0.151085	-0.180537	0.854388	-0.0548285
NETS29	0.325179	0.280883	0.323325	0.358138	0.215587	0.161154	0.0966209	0.0663635	0.0218081	0.0318755	0.00853923	0.299633	0.186185	0.196915	0.173529	-0.0305307	-0.0321017			-0.13622	0.151101	0.107674	-0.398033	-0.252491	-0.400442	-0.313156	-0.671384	0.461636	-0.732107	34.0891	-0.378624	0.0576289	-0.118762	-1.17594	0.0514562
NETS30	-0.0660901	-0.137618	-0.250951	-0.224439	-0.385111	-0.491974	-0.549235	-0.552701	-0.573722	-0.554309	-0.654098	-0.0176692	-0.197545	-0.15906	-0.10933	-0.302225	-0.289868			1.08227	0.823538	-0.105646	0.715886	0.277485	0.116391	0.00631138	0.0380316	-0.0338365	0.180025	-0.972987	10.1802	-0.194819	-0.312649	1.76434	-0.0408869
NETS31	0.161766	0.110414	0.02656	0.0205467	-0.166652	-0.294679	-0.380218	-0.386379	-0.416433	-0.407054	-0.496462	-0.0626318	-0.182994	-0.146692	-0.121212	-0.260818	-0.265759			-0.317445	-0.75945	-0.226405	-9.11091	0.768224	0.29028	0.016203	0.0777839	-0.0225205	0.219645	-0.873844	1.92174	-0.19838	-0.173696	1.15175	0.018945
NETS32	-0.0265143	-0.0583803	-0.217615	-0.219171	-0.316286	-0.383426	-0.40366	-0.414071	-0.420861	-0.413099	-0.432425	-0.180931	-0.281601	-0.281429	-0.263815	-0.338604	-0.340321			1.20184	2.72755	0.00715118	0.4431	0.212277	0.0527707	0.0257922	0.0163967	-0.0184425	0.0467822	-0.581589	0.556397	-0.000611305	-0.0625848	0.283489	0.00507122
NETS33	-0.0385578	-0.0829956	-0.185882	-0.159022	-0.269558	-0.358562	-0.312988	-0.34145	-0.353784	-0.344424	-0.26501	-0.164004	-0.195163	-0.216044	-0.220288	-0.304185	-0.311436			1.1525	1.23966	-0.144503	0.6951	0.330188	-0.127102	0.0909353	0.0361222	-0.0264558	-0.23057	-0.38114	0.189987	0.106991	0.0196485	0.38085	0.0238366
NETS34	-0.0517519	-0.1045	-0.205589	-0.209175	-0.306746	-0.381102	-0.377317	-0.393482	-0.406339	-0.397434	-0.478767	-0.175205	-0.283547	-0.284688	-0.26416	-0.333007	-0.337205			1.01925	0.967361	0.0174422	0.466456	0.2424	-0.00993049	0.0428404	0.0326769	-0.0219171	0.204647	-0.63405	0.618373	0.00402466	-0.0721085	0.260628	0.0126037
NETS35																				#DIV/0!	#DIV/0!	#DIV/0!	#DIV/0!	#DIV/0!	#DIV/0!	#DIV/0!	#DIV/0!	#DIV/0!	#DIV/0!	#DIV/0!	#DIV/0!	#DIV/0!	#DIV/0!	#DIV/0!	#DIV/0!
NORS1	0.38879	0.449387	0.414028	0.436259	0.406586	0.468836	0.444278	0.431142	0.447015	0.349169	0.291985	0.314672	0.465324	0.561709	0.581302	0.560308	0.525703			0.155861	-0.078682	0.0536926	-0.0680168	0.153106	-0.0523821	-0.0295665	0.0368165	-0.218887	-0.163774	0.0777023	0.478756	0.207135	0.0348813	-0.0361153	-0.0617609
NORS2	0.252408	0.470304	0.532988	0.509896	0.423344	0.427218	0.400414	0.418636	0.279945	0.391531	0.0464075	0.427299	0.474504	0.487407	0.508895	0.51204	0.524389			0.863271	0.133285	-0.0433268	-0.169744	0.00915156	-0.0627408	0.0455071	-0.331291	0.398598	-0.881472	8.20754	0.110473	0.0271914	0.0440869	0.00618078	0.0241172
NORS3	0.607999	0.65566	0.618161	0.629919	0.594347	0.623648	0.600852	0.593386	0.613054	0.557044	0.504388	0.523062	0.628681	0.700616	0.688957	0.676002	0.65152			0.0783894	-0.0571925	0.0190208	-0.0564705	0.0492997	-0.0365525	-0.0124271	0.0331469	-0.0913637	-0.094527	0.0370236	0.201923	0.114424	-0.0166418	-0.018804	-0.0362163
NORS4	-0.0142708	0.0257451	-0.0169913	-0.00985902	-0.0175446	-0.00347321	-0.0157808	-0.0170772	-0.0486266	-0.0674708	-0.0773487	-0.037585	-0.0374893	0.0108568	-0.000536325	-0.0173496	-0.018408			-2.80405	-1.65998	-0.419762	0.779548	-0.802036	3.54359	0.0821504	1.84745	0.387528	0.146402	-0.514084	-0.00254568	-1.2896	-1.0494	31.349	0.0610046
NORS5	-0.0362852	-0.0301715			-0.0267852	-0.0221899	-0.0249678	-0.0254054	-0.0846309	-0.0462152	-0.0476084	-0.0442973	-0.0483724	-0.0373522	-0.0422517	-0.0426042	-0.0499545			-0.168489	-1	#DIV/0!	#DIV/0!	-0.171563	0.125187	0.0175296	2.33121	-0.453921	0.0301463	-0.0695477	0.0919939	-0.22782	0.13117	0.00834422	0.172523
NORS6	0.211851	0.254036	0.187464	0.219534	0.182378	0.211458	0.177008	0.163532	0.136899	0.0718355	0.0291615	0.043741	0.153404	0.240376	0.268829	0.239938	0.190182			0.19913	-0.262058	0.171073	-0.16925	0.159451	-0.162916	-0.0761351	-0.162861	-0.475266	-0.594051	0.499957	2.5071	0.566946	0.118369	-0.107471	-0.20737
NORS7	0.298145	0.284337	0.186047	0.246521	0.249472	0.244889	0.176361	0.142761	0.091145	0.0650962	-0.0721018	0.113938	0.137119	0.232469	0.178958	0.148191	0.134976			-0.0463134	-0.345682	0.325045	0.011974	-0.0183742	-0.27983	-0.190518	-0.361556	-0.285796	-2.10762	-2.58024	0.203451	0.695378	-0.230183	-0.171927	-0.089171
NORS8	0.20509	0.474145	0.522399	0.515666	0.487889	0.511043	0.279896	0.488159	0.350755	0.414191	0.16557	0.477709	0.542048	0.495605	0.542587	0.543369	0.554274			1.31189	0.10177	-0.0128883	-0.0538666	0.047458	-0.452305	0.744072	-0.281474	0.180857	-0.600257	1.88524	0.134683	-0.0856805	0.0947976	0.00143986	0.0200696
NORS9	0.225699	0.429866	0.492643	0.387185	0.40303	0.452105	0.360996	0.428564	0.147289	0.23173	-0.0452882	0.336164	0.331831	0.340985	0.411316	0.417998	0.412137			0.904596	0.146038	-0.214065	0.0409224	0.121764	-0.201521	0.187171	-0.65632	0.573302	-1.19544	-8.42277	-0.0128889	0.0275847	0.206261	0.016245	-0.0140212
NORS10	0.0364956	0.0898365	0.0407482	0.0412924	0.0776906	0.0504876	0.0328885	0.0245798	-0.0265577	-0.0703709	-0.0874254	-0.0107005	-0.0122817	0.043302	0.0466161	0.0210913	0.00430373			1.46157	-0.546418	0.0133552	0.881475	-0.350146	-0.348582	-0.252632	-2.08047	1.64974	0.242351	-0.877605	0.14777	-4.52574	0.0765336	-0.547553	-0.795948
NORS11	-0.000430828	0.143133	0.24941	0.237807	0.212841	0.157913	0.146036	0.172256	0.0354433	0.124464	-0.10424	0.214401	0.228918	0.188985	0.265022	0.265939	0.26443			-333.227	0.742508	-0.0465207	-0.104983	-0.25807	-0.0752156	0.179545	-0.794241	2.51165	-1.83751	-3.0568	0.0677057	-0.174439	0.402342	0.00346121	-0.00567572
NORS12	-0.579043	-0.276016	-0.283183	-0.471009	-0.593374	-0.435405	-0.417209	-0.387137	-0.394502	-0.443893	-0.472655	-0.35753	-0.311817	-0.361014	-0.0212424	0.0228066	-0.203125			-0.523323	0.0259632	0.663269	0.259794	-0.266222	-0.0417922	-0.0720784	0.0190245	0.125197	0.0647956	-0.243572	-0.127857	0.157777	-0.941159	-2.07363	-9.90642
NORS13	-0.275745	0.0579167	0.0576965	-0.139957	-0.301393	-0.0226226	0.0259266	0.0493576	0.0909787	0.0500281	0.0575888	0.0540406	0.163402	0.13708	0.198601	-0.00981929	-0.07929			-1.21004	-0.00380194	-3.42574	1.15347	-0.92494	-2.14605	0.903741	0.843256	-0.450112	0.151129	-0.0616141	2.02369	-0.16109	0.448798	-1.04944	7.07492
NORS14	0.207038	0.317367	0.192279	0.0455192	0.123465	0.187873	0.174231	0.160272	0.0946368	-0.0242243	-0.0651449	0.0900843	0.0247078	0.102088	0.101858	0.0695388	0.0676861			0.532889	-0.394143	-0.763265	1.71238	0.521666	-0.0726092	-0.0801196	-0.409524	-1.25597	1.68924	-2.38283	-0.725726	3.1318	-0.00224591	-0.317299	-0.0266424
NORS15	-0.2352	-0.0210441	-0.10114	-0.292657	-0.315611	0.118325	0.173661	0.189557	0.101074	0.152127	-0.0764889	0.117118	0.214801	0.193239	0.231613	0.239288	0.29043			-0.910527	3.80609	1.89359	0.0784327	-1.37491	0.46766	0.0915328	-0.466789	0.505112	-1.5028	-2.53118	0.834054	-0.100382	0.198584	0.0331369	0.213723
NORS16	0.0592237	0.110008	0.0277599	0.0292958	0.00999167	0.0424025	0.0234063	0.0156804	-0.0257359	-0.0704369	-0.0874077	-0.0186548	-0.0100657	0.0453414	0.0470946	0.00793904	-0.00206558			0.857504	-0.747656	0.0553304	-0.658939	3.24378	-0.447998	-0.330077	-2.64128	1.73691	0.240937	-0.786577	-0.460425	-5.50455	0.0386666	-0.831424	-1.26018
NORS17	0.229607	0.23628	0.177103	0.253478	0.258108	0.279266	0.215847	0.172869	0.102231	0.0707323	-0.0849862	0.146954	0.179794	0.448347	0.421268	0.371774	0.379314			0.0290609	-0.250453	0.431245	0.0182693	0.0819732	-0.227092	-0.199114	-0.408622	-0.308112	-2.20152	-2.72915	0.223471	1.49368	-0.0603989	-0.117488	0.0202821
NORS18	0.411201	0.575729	0.568351	0.486716	0.427336	0.535924	0.56163	0.572031	0.538603	0.172109	0.0988374	0.584931	0.608446	0.67741	0.66268	0.59308	0.612045			0.400114	-0.0128141	-0.143635	-0.122002	0.254106	0.0479643	0.0185194	-0.058436	-0.680454	-0.425726	4.91812	0.0402004	0.113345	-0.0217442	-0.105029	0.031978
NORS19	-0.334014	-0.168806	0.135317	0.174812	0.122893	0.171406	0.195858	0.181634	0.139811	-0.0639687	-0.127851	0.167577	-0.114698	0.00135472	0.0429131	-0.0327676	0.314649			-0.494614	-1.80161	0.291872	-0.297004	0.394762	0.142657	-0.0726266	-0.230257	-1.45754	0.998651	-2.31072	-1.68445	-1.01181	30.6768	-1.76358	-10.6024
NORS20	0.426269	0.547864	0.455826	0.487582	0.446315	0.502261	0.470533	0.451652	0.366332	0.209788	0.17089	0.390758	0.438215	0.540906	0.5499	0.487438	0.477252			0.285256	-0.167995	0.0696673	-0.0846371	0.125351	-0.0631697	-0.0401277	-0.188906	-0.427327	-0.185418	1.28661	0.121448	0.234338	0.0166282	-0.113588	-0.0208964
NORS21	0.365384	0.51513	0.487294	0.464782	0.391255	0.465476	0.487369	0.491081	0.429561	0.163776	0.11561	0.483151	0.503503	0.596257	0.574695	0.486718	0.503805			0.409832	-0.0540374	-0.046198	-0.158197	0.189699	0.0470335	0.00761697	-0.125275	-0.618736	-0.294098	3.17915	0.0421239	0.184219	-0.0361623	-0.153086	0.0351082
NORS22	0.263407	0.388035	0.395942	0.353358	0.29247	0.371012	0.40277	0.415991	0.394093	0.136315	0.0905917	0.42513	0.448462	0.505038	0.481473	0.457714	0.485201			0.473139	0.0203772	-0.107551	-0.172315	0.26855	0.0855971	0.0328251	-0.0526394	-0.654105	-0.335423	3.69282	0.0548805	0.126156	-0.0466604	-0.049346	0.0600524
NORS23	0.237349	0.32062	0.244849	0.287553	0.301099	0.217787	0.185392	0.135811	0.0123874	0.12193	-0.243133	0.205948	0.254467	0.376109	0.331892	0.292376	0.271564			0.350842	-0.236328	0.174412	0.0471052	-0.276693	-0.148747	-0.267436	-0.90879	8.84306	-2.99404	-1.84706	0.235589	0.478028	-0.117564	-0.119065	-0.0711803
NORS24	-0.15842	-0.0858714	0.169451	-0.423727	-0.338991	-0.503775	-0.566414	-0.458803	-0.606289	-0.502995	-0.606057	-0.496459	0.345694	0.246622	0.21421	0.00121107	-0.0833916			-0.45795	-2.97332	-3.50058	-0.199978	0.486102	0.124339	-0.189987	0.321459	-0.170371	0.204897	-0.180838	-1.69632	-0.28659	-0.131422	-0.994346	-69.858
NORS25	-0.045684	0.117468	0.0374849	-0.132547	-0.135205	-0.0331599	-0.350954	-0.198305	-0.444634	-0.354595	-0.450564	-0.177121	0.224891	-0.097929	0.0559495	0.0659003	0.104007			-3.57131	-0.680891	-4.53601	0.0200499	-0.754743	9.58369	-0.434954	1.24218	-0.202503	0.270644	-0.606891	-2.26971	-1.43545	-1.57133	0.177854	0.578244
NORS26	-0.0440122	0.202529	0.135624	-0.114177	-0.177613	0.00418439	0.0490069	0.0748461	0.195806	0.16971	0.126626	0.164305	0.296377	-0.0478249	0.19162	0.203995	0.265943			-5.60166	-0.330347	-1.84186	0.555594	-1.02356	10.7118	0.527258	1.61612	-0.133276	-0.253871	0.297565	0.803824	-1.16136	-5.00669	0.0645833	0.303673
NORS27	0.251671	0.392059	0.29988	0.363115	0.257528	0.331017	0.295994	0.258303	0.171096	0.0204411	-0.0385306	0.234331	0.249135	0.350604	0.332184	0.296093	0.28713			0.55782	-0.235114	0.210868	-0.290782	0.285366	-0.105805	-0.127336	-0.337616	-0.880529	-2.88496	-7.08169	0.0631764	0.407284	-0.0525378	-0.108647	-0.0302722
NORS28	0.406764	0.408265	0.331832	0.393341	0.392153	0.41333	0.389686	0.345161	0.289761	0.24094	0.0449194	0.32107	0.370653	0.480213	0.443881	0.394332	0.39071			0.00368933	-0.187215	0.185363	-0.00302031	0.054002	-0.0572027	-0.11426	-0.160503	-0.168487	-0.813567	6.14769	0.154432	0.295586	-0.0756599	-0.111625	-0.00918673
NORS29	0.360413	0.519955	0.553868	0.493233	0.42173	0.51792	0.563075	0.573082	0.547398	0.253287	0.184653	0.600199	0.615926	0.709525	0.672741	0.611732	0.632546			0.442664	0.0652234	-0.109476	-0.144968	0.228085	0.0871843	0.0177738	-0.0448187	-0.53729	-0.27097	2.25041	0.0262019	0.151965	-0.0518431	-0.0906874	0.0340251
NORS30	0.493874	0.499211	0.423444	0.48965	0.52032	0.556988	0.498162	0.446641	0.381818	0.350371	0.126997	0.426547	0.459999	0.584668	0.549627	0.508449	0.505865			0.0108065	-0.151772	0.156351	0.0626357	0.0704727	-0.105615	-0.103422	-0.145134	-0.0823624	-0.637537	2.35873	0.0784254	0.27102	-0.0599343	-0.0749198	-0.00508062
NORS31	0.358598	0.515512	0.552468	0.497837	0.425542	0.515909	0.547546	0.562698	0.545728	0.22864	0.16296	0.614727	0.640616	0.713528	0.674942	0.612668	0.634446			0.437574	0.0716884	-0.0988859	-0.145218	0.212359	0.0613222	0.0276717	-0.0301581	-0.581036	-0.287263	2.77225	0.0421153	0.113815	-0.0540778	-0.0922648	0.0355462
NORS32	0.255529	0.241585	0.188528	0.253591	0.26483	0.294969	0.233393	0.193008	0.134583	0.0975631	-0.0534204	0.1685	0.197338	0.287679	0.245839	0.214765	0.209213			-0.0545714	-0.21962	0.345109	0.0443209	0.113804	-0.208754	-0.173035	-0.302709	-0.275069	-1.54755	-4.15422	0.17115	0.457796	-0.14544	-0.126399	-0.0258509
NORS33	0.322423	0.336113	0.284053	0.350379	0.347738	0.395062	0.347224	0.3029	0.267003	0.194126	0.0431922	0.316088	0.347949	0.478342	0.424067	0.338234	0.325874			0.0424604	-0.154889	0.2335	-0.00753764	0.136089	-0.121088	-0.127652	-0.118513	-0.272943	-0.777505	6.31817	0.100797	0.374747	-0.113464	-0.202405	-0.0365439
NORS34	0.374557	0.380617	0.326432	0.389507	0.41477	0.449652	0.3995	0.350518	0.301355	0.256471	0.0701898	0.346162	0.380534	0.362461	0.321393	0.290661	0.297222			0.016177	-0.14236	0.193226	0.064859	0.0841001	-0.111535	-0.122609	-0.140259	-0.148938	-0.726325	3.9318	0.0992934	-0.0474925	-0.113303	-0.0956231	0.0225737
NORS35																				#DIV/0!	#DIV/0!	#DIV/0!	#DIV/0!	#DIV/0!	#DIV/0!	#DIV/0!	#DIV/0!	#DIV/0!	#DIV/0!	#DIV/0!	#DIV/0!	#DIV/0!	#DIV/0!	#DIV/0!	#DIV/0!
POLS1	0.380672	0.312243	0.372447	0.318655	0.270713	0.238008	0.219679	0.234309	0.274888	0.226013	0.125578	0.226023	0.354071	0.27252	0.107747	-0.11024	0.204661			-0.179759	0.19281	-0.144429	-0.150451	-0.120809	-0.0770104	0.0665951	0.173189	-0.1778	-0.444379	0.799869	0.566527	-0.230323	-0.604626	-2.02314	-2.8565
POLS2	-0.0740473	-0.0794937	-0.0134028	-0.105806	-0.138845	-0.1831	-0.170291	-0.116015	-0.0680568	-0.0454796	-0.120089	-0.0103855	0.0511286	0.1261	0.0469833	-0.012643	-0.0353977			0.0735533	-0.831398	6.89435	0.31225	0.31874	-0.0699541	-0.318725	-0.413381	-0.331741	1.64051	-0.913519	-5.92307	1.46632	-0.627411	-1.26909	1.79979
POLS3	0.58259	0.532839	0.55718	0.507968	0.473189	0.4462	0.430867	0.44225	0.483017	0.434771	0.343192	0.445116	0.564972	0.481339	0.314566	0.0713062	0.403326			-0.0853971	0.0456824	-0.0883228	-0.0684679	-0.0570351	-0.0343645	0.0264188	0.092181	-0.0998834	-0.210639	0.296989	0.269271	-0.14803	-0.346477	-0.773319	4.65626
POLS4	0.118538	0.0720601	0.079172	-0.0150652	-0.147491	-0.106032	-0.099394	-0.0565291	-0.181582	-0.218386	-0.225037	-0.0364534	-0.236382	-0.420932	-0.220704	-0.264297	-0.0613316			-0.392096	0.098694	-1.19028	8.79015	-0.281094	-0.0626035	-0.431263	2.2122	0.202682	0.0304538	-0.838011	5.4845	0.780725	-0.475678	0.197519	-0.767945
POLS5	-0.00608116	-0.013683	-0.0222647	-0.0255625	-0.0270566	-0.041848	-0.0483988	-0.0307865	-0.0439379	-0.0396673	-0.0350496	-0.0619543	-0.0561308	-0.0465395	-0.0505326	-0.0725572	-0.0439481			1.25006	0.627178	0.148121	0.0584469	0.546684	0.156538	-0.3639	0.427181	-0.0971952	-0.116411	0.767616	-0.0939954	-0.170875	0.0858001	0.435849	-0.394298
POLS6	0.217563	0.156315	0.176441	0.111689	0.0939203	0.00722621	0.00229663	-0.0204755	-0.0114416	0.0180152	-0.0228405	-0.136713	0.019584	0.0856512	-0.0875291	-0.164424	-0.0932452			-0.281519	0.128753	-0.366988	-0.159094	-0.92306	-0.68218	-9.91543	-0.441202	-2.57453	-2.26785	4.98557	-1.14325	3.37353	-2.02193	0.878504	-0.432897
POLS7	-0.0602591	0.0480641	-0.0155509	-0.117421	-0.190413	-0.196645	-0.235124	-0.272327	-0.30699	-0.309741	-0.276826	-0.164398	-0.0925664	0.0429447	0.000564727	-0.00758007	-0.0528259			-1.79762	-1.32355	6.55072	0.621626	0.0327339	0.195674	0.158227	0.127287	0.00896043	-0.106266	-0.406132	-0.436938	-1.46393	-0.98685	-14.4225	5.96905
POLS8	-0.57992	-0.585585	-0.555735	-0.660694	-0.696602	-0.717764	-0.716363	-0.685526	-0.664085	-0.681268	-0.709594	-0.622634	-0.545937	-0.589478	-0.713662	-0.799953	-0.786101			0.00976795	-0.0509744	0.188866	0.0543485	0.0303792	-0.00195262	-0.0430469	-0.0312768	0.0258753	0.0415787	-0.12255	-0.123182	0.0797563	0.210668	0.120913	-0.017316
POLS9	-0.237138	-0.186981	-0.166962	-0.241788	-0.350112	-0.328388	-0.368511	-0.379918	-0.43568	-0.457596	-0.416729	-0.288071	-0.173805	-0.204377	-0.22965	-0.26133	-0.0785506			-0.211507	-0.107069	0.448165	0.448013	-0.0620495	0.122182	0.0309542	0.146775	0.0503024	-0.0893073	-0.308732	-0.39666	0.175901	0.123655	0.137953	-0.69942
POLS10	-0.0418812	0.0177219	-0.0471796	-0.199526	-0.320467	-0.286444	-0.314471	-0.323817	-0.403011	-0.399094	-0.403891	-0.276277	-0.130507	-0.3077	-0.358803	-0.24268	-0.0180988			-1.42315	-3.66222	3.22908	0.60614	-0.106166	0.0978424	0.0297216	0.244565	-0.00971992	0.0120205	-0.315962	-0.527624	1.35773	0.166082	-0.323642	-0.925421
POLS11	-0.0215302	-0.0378798	0.0166539	-0.0576762	-0.0983203	-0.133608	-0.121236	-0.0506798	-0.0210034	0.0171251	-0.0724039	-0.125505	0.0452433	0.109395	-0.0818981	-0.0976993	0.00281149			0.759384	-1.43965	-4.46322	0.704694	0.358911	-0.0926018	-0.581975	-0.585566	-1.81535	-5.22795	0.733405	-1.36049	1.41793	-1.74865	0.192936	-1.02878
POLS12	-0.50972	-0.452092	-0.409814	-0.437696	-0.488152	-0.46537	-0.462467	-0.471903	-0.511084	-0.525027	-0.467315	-0.444217	-0.180835	-0.208913	-0.158523	-0.108609	-0.0285462			-0.113057	-0.0935178	0.0680371	0.115277	-0.0466699	-0.00623777	0.0204025	0.0830271	0.0272809	-0.109921	-0.049428	-0.592914	0.155269	-0.241197	-0.314873	-0.737165
POLS13	-0.292691	-0.246439	-0.192788	-0.261446	-0.311014	-0.309608	-0.298484	-0.311904	-0.34737	-0.359506	-0.287843	-0.271716	-0.0123765	0.0590775	0.0239722	-0.0742602	-0.00030333			-0.158026	-0.217703	0.356132	0.189593	-0.00452197	-0.0359286	0.0449606	0.113708	0.0349376	-0.199337	-0.0560293	-0.954451	-5.77337	-0.594225	-4.09776	-0.995915
POLS14	-0.358191	-0.276683	-0.387332	-0.571763	-0.45796	-0.439904	-0.544	-0.533055	-0.596146	-0.591049	-0.585554	-0.741348	-0.766841	-0.745133	-0.78655	-0.692379	-0.629036			-0.227554	0.399909	0.476159	-0.199039	-0.039426	0.236632	-0.02012	0.118359	-0.00855059	-0.00929624	0.266061	0.0343875	-0.0283087	0.055584	-0.119727	-0.0914855
POLS15	-0.410025	-0.430502	-0.394988	-0.485282	-0.538821	-0.521746	-0.535723	-0.550633	-0.589284	-0.59579	-0.56718	-0.650259	-0.615123	-0.594725	-0.536625	-0.596242	-0.544868			0.0499414	-0.0824936	0.228599	0.110324	-0.031689	0.0267893	0.0278314	0.0701942	0.0110397	-0.0480194	0.146476	-0.0540331	-0.0331615	-0.0976911	0.111096	-0.0861639
POLS16	0.195483	0.156953	0.176692	0.119287	0.0713557	0.0361239	0.0182322	0.0333564	0.076059	0.0861385	0.0793802	0.00909218	0.134909	0.164089	0.0361384	-0.0458431	-0.0158593			-0.197098	0.12576	-0.324886	-0.401816	-0.493748	-0.495288	0.829533	1.28019	0.132522	-0.078459	-0.88546	13.838	0.216289	-0.779764	-2.26854	-0.654053
POLS17	-0.172914	-0.172735	0.00975821	-0.211487	-0.275831	-0.361949	-0.324364	-0.212222	-0.117949	-0.107167	-0.271695	-0.0479855	0.0969568	0.372356	0.311391	0.245344	0.255391			-0.0010319	-1.05649	-22.6727	0.304245	0.312214	-0.103841	-0.345728	-0.44422	-0.0914076	1.53524	-0.823385	-3.02054	2.84043	-0.163729	-0.212103	0.0409526
POLS18	0.244845	0.302545	0.407019	0.367366	0.265065	0.202558	0.185368	0.198234	0.249703	0.196187	0.208153	0.233995	0.402446	0.51024	0.410394	0.283096	0.359602			0.235657	0.345318	-0.097422	-0.27847	-0.235818	-0.084868	0.0694112	0.25964	-0.214322	0.0609925	0.124153	0.71989	0.267846	-0.195684	-0.310184	0.270246
POLS19	0.130863	0.131338	0.187679	0.160411	0.0988066	0.0824783	0.094668	0.0963953	0.0469381	0.0692177	0.122334	0.0516139	0.209299	0.223451	0.115164	0.00328346	0.04313			0.00362451	0.428983	-0.145292	-0.384042	-0.165255	0.147793	0.0182452	-0.513066	0.474659	0.767386	-0.578091	3.05509	0.0676155	-0.484612	-0.971489	12.1355
POLS20	0.376966	0.330437	0.365681	0.26534	0.134007	0.0543626	0.0371886	0.074563	0.147957	0.16999	0.139559	0.206188	0.387021	0.477252	0.247664	-0.0119292	0.058296			-0.12343	0.106656	-0.274395	-0.494961	-0.59433	-0.315917	1.005	0.984326	0.148915	-0.17902	0.477427	0.877034	0.233142	-0.481064	-1.04817	-5.88682
POLS21	0.319606	0.290942	0.368886	0.33434	0.261316	0.206431	0.190224	0.217706	0.265794	0.294989	0.271238	0.256546	0.394433	0.429514	0.268633	0.135998	0.200819			-0.0896852	0.267903	-0.0936481	-0.218412	-0.210033	-0.0785122	0.144474	0.220885	0.109839	-0.0805141	-0.0541678	0.537477	0.0889396	-0.374565	-0.493739	0.476624
POLS22	0.287963	0.259094	0.295545	0.232121	0.174326	0.142714	0.136592	0.158996	0.2143	0.13657	0.0402247	0.164262	0.308692	0.156941	0.023648	-0.142415	0.156123			-0.100255	0.140688	-0.214601	-0.248988	-0.181334	-0.0428963	0.164015	0.347835	-0.362714	-0.705465	3.08361	0.879266	-0.491593	-0.849319	-7.02226	-2.09626
POLS23	-0.118868	-0.18366	-0.0951628	-0.266897	-0.398961	-0.422529	-0.418945	-0.387585	-0.342219	-0.331172	-0.36339	-0.210578	0.087025	0.215401	-0.142133	-0.352408	-0.303527			0.545081	-0.481854	1.80464	0.494811	0.0590728	-0.00848168	-0.0748553	-0.117048	-0.0322808	0.0972852	-0.420517	-1.41327	1.47516	-1.65986	1.47942	-0.138704
POLS24	-0.0281338	-0.0392422	-0.0384326	-0.0450832	-0.0495085	-0.0554612	-0.0559892	-0.0567094	-0.0656956	-0.065734	-0.0568395	-0.0817034	-0.0663696	-0.0392602	-0.0821962	-0.107773	-0.0928338			0.39484	-0.0206321	0.173046	0.0981593	0.120236	0.00951996	0.0128631	0.158461	0.00058427	-0.135311	0.437441	-0.187676	-0.408461	1.09363	0.311172	-0.138621
POLS25	-0.0327769	-0.0504383	-0.007573	0.0314929	-0.0095511	-0.0518679	-0.0685943	-0.0681796	-0.0338578	-0.021446	-0.0303441	-0.0759236	0.119333	-0.00789383	-0.0638349	-0.155197	-0.124932			0.538837	-0.849856	-5.15857	-1.30328	4.43057	0.32248	-0.00604607	-0.503402	-0.366586	0.414906	1.50209	-2.57176	-1.06615	7.08669	1.43122	-0.195007
POLS26	-0.0522165	-0.0927205	0.0170033	0.10103	0.0245998	-0.0744523	-0.0959782	-0.0925404	0.00594962	-0.0216492	-0.0490688	0.0667874	0.27164	0.337715	0.127151	-0.0684583	-0.024485			0.775693	-1.18338	4.94178	-0.756509	-4.02654	0.289123	-0.0358181	-1.06429	-4.63875	1.26654	-2.3611	3.06723	0.243245	-0.623496	-1.5384	-0.642338
POLS27	0.204772	0.219327	0.29476	0.25317	0.205201	0.183451	0.172133	0.187738	0.158019	-0.00525493	0.0383452	0.168958	0.272703	0.348661	0.211535	0.102484	0.148192			0.0710791	0.343928	-0.141096	-0.189474	-0.105993	-0.0616954	0.0906567	-0.158302	-1.03326	-8.29701	3.40622	0.614029	0.278539	-0.393293	-0.515524	0.446006
POLS28	0.228186	0.244115	0.302161	0.253405	0.194515	0.178905	0.181793	0.185207	0.148269	0.134108	0.189315	0.165012	0.295473	0.32578	0.18952	0.0683899	0.116485			0.0698055	0.237783	-0.161358	-0.232392	-0.0802502	0.0161414	0.0187801	-0.19944	-0.0955139	0.411664	-0.128375	0.790618	0.102572	-0.418257	-0.639142	0.703243
POLS29	0.231864	0.196801	0.306158	0.210567	0.194297	0.074423	0.0724989	0.194152	0.27606	0.231055	0.129542	0.315499	0.449743	0.519328	0.444473	0.293375	0.313317			-0.151224	0.555674	-0.31223	-0.0772636	-0.616963	-0.0258539	1.678	0.421876	-0.163027	-0.439347	1.4355	0.425495	0.154723	-0.144137	-0.339949	0.0679727
POLS30	0.241098	0.247852	0.340952	0.309124	0.230991	0.192039	0.182471	0.20234	0.201446	0.222709	0.284944	0.280579	0.39422	0.460658	0.312748	0.195653	0.249565			0.0280142	0.375626	-0.0933513	-0.252757	-0.168629	-0.049821	0.108884	-0.00441355	0.105547	0.279447	-0.015318	0.405022	0.168532	-0.321085	-0.374407	0.275552
POLS31	0.0555923	0.0819552	0.204622	0.199114	0.101139	0.0643141	0.0500824	0.0532951	0.0360545	0.0078418	0.0810697	0.0629168	0.251762	0.338337	0.215881	0.153302	0.192859			0.474217	1.49675	-0.0269192	-0.492054	-0.364102	-0.221284	0.0641474	-0.323492	-0.782502	9.33815	-0.223917	3.0015	0.34388	-0.361937	-0.289877	0.258038
POLS32	-0.0166194	-0.0402376	0.0171599	-0.061117	-0.0825331	-0.119203	-0.114113	-0.0484223	0.00581393	0.0251869	-0.0265769	0.051437	0.164687	0.177356	0.0499366	-0.0324033	-0.0275733			1.42112	-1.42646	-4.56162	0.350411	0.444308	-0.0427029	-0.575663	-1.12007	3.33217	-2.05519	-2.9354	2.20172	0.07693	-0.718438	-1.64889	-0.149061
POLS33	-0.036813	-0.0395221	0.0535538	-0.0184852	-0.0592912	-0.108813	-0.0986958	-0.0177018	0.0234869	0.0432854	-0.0461738	0.176201	0.259697	0.312573	0.212887	0.0452359	0.0667967			0.0735893	-2.35504	-1.34517	2.20749	0.835238	-0.0929816	-0.820643	-2.32681	0.842956	-2.06673	-4.81604	0.473868	0.203606	-0.318921	-0.787512	0.47663
POLS34	0.16318	0.188849	0.263814	0.238024	0.175927	0.164769	0.161751	0.171175	0.1278	0.199419	0.258976	0.157096	0.317893	0.361946	0.226147	0.115148	0.145173			0.157303	0.396958	-0.0977574	-0.260884	-0.0634256	-0.0183154	0.0582595	-0.253397	0.560403	0.298652	-0.393397	1.02356	0.138578	-0.37519	-0.490829	0.260752
POLS35																				#DIV/0!	#DIV/0!	#DIV/0!	#DIV/0!	#DIV/0!	#DIV/0!	#DIV/0!	#DIV/0!	#DIV/0!	#DIV/0!	#DIV/0!	#DIV/0!	#DIV/0!	#DIV/0!	#DIV/0!	#DIV/0!
PORS1	0.081853	0.0326119	0.15286	0.0614819	0.00462662	-0.0235722	-0.216666	-0.0694624	-0.221918	-0.340223	-0.354531	-0.146576	-0.253666	-0.144831	-0.336748	-0.335386	-0.229092			-0.60158	3.68725	-0.597789	-0.924748	-6.0949	8.1916	-0.679404	2.1948	0.533101	0.0420547	-0.586563	0.730607	-0.429048	1.32511	-0.0040442	-0.316932
PORS2	-0.458424	-0.470187	-0.442679	-0.458574	-0.441777	-0.432146	-0.427212	-0.424941	-0.441443	-0.397742	-0.420177	-0.310948	-0.27499	-0.301183	-0.267713	-0.306923	-0.271957			0.0256599	-0.0585038	0.0359061	-0.0366303	-0.0217995	-0.0114167	-0.00531704	0.038834	-0.0989968	0.0564075	-0.259961	-0.115639	0.0952492	-0.111127	0.146462	-0.113924
PORS3	0.282082	0.229406	0.353718	0.258642	0.190638	0.165718	-0.0930396	0.118815	-0.112567	-0.311778	-0.332761	-0.0258892	-0.167326	-0.0225674	-0.330813	-0.337789	-0.166707			-0.18674	0.541887	-0.268789	-0.262927	-0.130722	-1.56143	-2.27704	-1.94741	1.76972	0.0673032	-0.922199	5.46314	-0.865129	13.6589	0.0210891	-0.506475
PORS4	-0.0731444	-0.155006	-0.0180552	-0.115234	-0.144275	-0.166219	-0.148799	-0.165429	-0.120132	-0.10271	-0.110143	0.000687495	-0.048459	0.031696	-0.136854	-0.204768	0.178318			1.11917	-0.883519	5.38229	0.252023	0.152093	-0.104797	0.111759	-0.273817	-0.145019	0.0723689	-1.00624	-71.4864	-1.65408	-5.31769	0.496258	-1.87083
PORS5	-0.168016	-0.206045	-0.124737	-0.18314	-0.209839	-0.237005	-0.22349	-0.234224	-0.208177	-0.19558	-0.203545	-0.0342517	0.0657791	0.0954759	0.124748	0.0830325	0.126283			0.226344	-0.394614	0.468213	0.145782	0.129459	-0.0570231	0.048029	-0.111207	-0.0605108	0.0407286	-0.831725	-2.92046	0.451462	0.306588	-0.334396	0.520881
PORS6	-0.0559569	-0.0970961	-0.0137489	-0.075255	-0.111958	-0.139786	-0.239136	-0.161823	-0.239923	-0.297574	-0.303832	-0.186171	-0.249839	-0.202809	-0.310884	-0.302677	-0.262361			0.735194	-0.858399	4.47353	0.487714	0.248555	0.710732	-0.3233	0.482622	0.240293	0.0210284	-0.387257	0.341991	-0.188243	0.532891	-0.0263978	-0.133201
PORS7	-0.297049	-0.325409	-0.228906	-0.339514	-0.396358	-0.338908	-0.400749	-0.408507	-0.443702	-0.419948	-0.426917	-0.418444	-0.341769	-0.29574	-0.342604	-0.442022	-0.3606			0.0954752	-0.296561	0.483205	0.167426	-0.144943	0.182469	0.0193596	0.0861543	-0.0535362	0.0165959	-0.0198467	-0.183238	-0.134678	0.158463	0.290183	-0.184203
PORS8	-0.907656	-0.920627	-0.899334	-0.917803	-0.935221	-0.938764	-0.943695	-0.937163	-0.936876	-0.927518	-0.93417	-0.893205	-0.923385	-0.899846	-0.892778	-0.899186	-0.858315			0.0142908	-0.0231283	0.0205364	0.0189776	0.00378895	0.00525233	-0.00692153	-0.000306751	-0.00998873	0.00717265	-0.0438526	0.0337888	-0.0254915	-0.0078554	0.00717769	-0.0454529
PORS9	-0.402495	-0.448607	-0.32806	-0.416565	-0.427673	-0.413311	-0.482326	-0.513189	-0.546436	-0.533584	-0.546026	-0.466608	-0.452981	-0.311338	-0.339449	-0.4614	-0.407694			0.114567	-0.268714	0.269784	0.026665	-0.0335827	0.166981	0.0639886	0.0647851	-0.0235198	0.0233176	-0.145447	-0.029205	-0.312692	0.0902919	0.359264	-0.116398
PORS10	-0.381541	-0.426692	-0.399547	-0.370655	-0.364653	-0.347507	-0.422344	-0.441826	-0.494925	-0.493477	-0.501072	-0.491929	-0.494497	-0.353691	-0.411432	-0.484408	-0.424939			0.118341	-0.0636185	-0.0723114	-0.016192	-0.0470206	0.215352	0.0461282	0.120183	-0.00292687	0.0153912	-0.0182463	0.00522022	-0.284746	0.163251	0.177372	-0.122766
PORS11	-0.621794	-0.639931	-0.597023	-0.607905	-0.588354	-0.511343	-0.548059	-0.533843	-0.581468	-0.499715	-0.48772	-0.428171	-0.246053	-0.243114	-0.193237	-0.298974	-0.225744			0.0291686	-0.0670502	0.018227	-0.0321617	-0.130893	0.0718038	-0.0259387	0.0892107	-0.140596	-0.0240049	-0.122097	-0.425338	-0.0119455	-0.20516	0.547192	-0.244938
PORS12	-0.652032	-0.705396	-0.665899	-0.719726	-0.739087	-0.724508	-0.731712	-0.71973	-0.746687	-0.729059	-0.742962	-0.717216	-0.651429	-0.629906	-0.681894	-0.720687	-0.677405			0.0818415	-0.0559915	0.0808323	0.0269016	-0.0197257	0.00994289	-0.016375	0.0374536	-0.0236083	0.0190701	-0.0346534	-0.0917254	-0.0330399	0.0825331	0.0568908	-0.0600574
PORS13	-0.394698	-0.442087	-0.343766	-0.407257	-0.472166	-0.43756	-0.436273	-0.434085	-0.434501	-0.410639	-0.417247	-0.451498	-0.438199	-0.333334	-0.422647	-0.535476	-0.51733			0.120065	-0.222403	0.184692	0.15938	-0.073291	-0.00294073	-0.00501487	0.000957394	-0.0549182	0.0160911	0.0820888	-0.0294557	-0.239309	0.26794	0.266956	-0.0338873
PORS14	-0.693495	-0.696869	-0.312473	-0.452486	-0.400545	-0.38689	-0.42184	-0.418981	-0.468213	-0.458742	-0.479971	-0.509139	-0.464435	-0.485445	-0.581065	-0.606837	-0.610479			0.00486469	-0.551604	0.448079	-0.114789	-0.0340926	0.0903376	-0.00677795	0.117504	-0.0202284	0.0462774	0.0607703	-0.0878039	0.0452382	0.196973	0.0443542	0.00600008
PORS15	-0.681698	-0.696401	-0.642656	-0.69205	-0.75398	-0.731491	-0.755787	-0.742773	-0.765706	-0.752238	-0.773947	-0.819857	-0.773954	-0.783335	-0.754495	-0.78734	-0.748492			0.021569	-0.0771751	0.0768584	0.089488	-0.0298271	0.0332148	-0.0172198	0.0308748	-0.0175881	0.0288588	0.0593189	-0.0559881	0.0121198	-0.0368163	0.0435316	-0.0493398
PORS16	-0.111807	-0.148888	-0.083547	-0.128247	-0.154181	-0.182062	-0.152523	-0.160682	-0.135409	-0.131311	-0.139344	-0.00992482	0.0267837	0.117594	-0.00290472	-0.0091715	0.079644			0.33166	-0.438861	0.535033	0.202214	0.180837	-0.162247	0.0534924	-0.157284	-0.0302679	0.0611739	-0.928774	-3.69866	3.3905	-1.0247	2.15745	-9.68385
PORS17	-0.726866	-0.767593	-0.760519	-0.748008	-0.796234	-0.798324	-0.809043	-0.796116	-0.807129	-0.808084	-0.807624	-0.735668	-0.656388	-0.706868	-0.644135	-0.713853	-0.603877			0.0560305	-0.00921573	-0.0164504	0.0644728	0.00262433	0.0134274	-0.0159775	0.0138334	0.00118216	-0.000568235	-0.0890964	-0.107766	0.0769064	-0.088748	0.108235	-0.15406
PORS18	-0.00546288	-0.121354	0.0232837	-0.161542	-0.222607	-0.262467	-0.271536	-0.256056	-0.28271	-0.256686	-0.275393	-0.295805	-0.205703	-0.0669365	-0.203111	-0.280179	-0.163627			21.2144	-1.19187	-7.93801	0.378009	0.179061	0.0345521	-0.0570098	0.104096	-0.0920514	0.0728772	0.0741213	-0.304602	-0.674595	2.03438	0.379438	-0.415989
PORS19	0.0409974	-0.00931825	0.0651555	0.0152811	-0.0073914	-0.0471914	-0.0408322	-0.058386	-0.028244	-0.0342592	-0.0291127	-0.0930084	0.125919	0.116626	0.13523	0.0227062	0.0601888			-1.22729	-7.99224	-0.765467	-1.4837	5.38463	-0.134753	0.429902	-0.516255	0.212976	-0.150223	2.19477	-2.35385	-0.0738078	0.159526	-0.832092	1.65076
PORS20	-0.0249915	-0.11662	0.0874019	-0.0590866	-0.153316	-0.198311	-0.187947	-0.20868	-0.151745	-0.116467	-0.140543	0.222941	0.327485	0.362959	0.376038	0.333202	0.417956			3.66637	-1.74946	-1.67603	1.59476	0.293484	-0.0522657	0.110313	-0.272833	-0.232482	0.206722	-2.58628	0.468933	0.108322	0.0360321	-0.113913	0.254361
PORS21	0.186689	0.112461	0.128519	0.127474	-0.0145686	-0.115623	-0.13008	-0.123029	-0.169738	-0.173932	-0.142978	-0.088013	0.137725	0.0921237	0.168026	0.0125834	0.165356			-0.397602	0.142788	-0.00813244	-1.11429	6.93647	0.125029	-0.0542051	0.37966	0.024711	-0.177964	-0.384432	-2.56483	-0.331104	0.823921	-0.925111	12.1409
PORS22	0.154568	0.0876673	0.114516	0.107961	-0.0146872	-0.0451847	-0.0936242	-0.0498712	-0.108082	-0.231396	-0.242617	-0.00414403	0.0122199	0.00932844	-0.209808	-0.122138	0.0676967			-0.432825	0.306263	-0.0572486	-1.13604	2.07647	1.07203	-0.467325	1.16723	1.14092	0.0484958	-0.982919	-3.94881	-0.236622	-23.4912	-0.417857	-1.55426
PORS23	-0.656965	-0.69736	-0.606196	-0.658989	-0.704994	-0.710747	-0.699253	-0.710653	-0.684892	-0.665306	-0.684484	-0.462125	-0.36253	0.0247585	-0.264377	-0.293467	-0.0164968			0.061488	-0.130727	0.0870877	0.0698121	0.00816037	-0.0161713	0.0163027	-0.0362505	-0.0285961	0.0288247	-0.324855	-0.215516	-1.06829	-11.6782	0.110032	-0.943787
PORS24	-0.066577	-0.0853884	-0.0421832	-0.061432	-0.0647136	-0.0729656	-0.0736917	-0.0845405	-0.0716058	-0.0763793	-0.0704218	-0.0336974	0.0237532	0.0021016	0.0293765	-0.00460489	0.015471			0.282551	-0.505984	0.456315	0.0534184	0.127515	0.00995187	0.147218	-0.152999	0.0666631	-0.0779995	-0.521492	-1.7049	-0.911524	12.9782	-1.15675	-4.35968
PORS25	-0.40699	-0.486253	-0.305524	-0.400861	-0.530789	-0.576651	-0.546157	-0.572896	-0.465076	-0.440515	-0.462264	-0.309926	-0.103789	-0.0147439	0.0548489	-0.306392	0.0849298			0.194756	-0.371678	0.312045	0.324123	0.0864037	-0.0528809	0.0489574	-0.188202	-0.0528107	0.0493718	-0.329546	-0.665118	-0.857943	-4.7201	-6.5861	-1.27719
PORS26	0.101216	0.0666182	0.155826	0.105249	0.0941685	0.0537269	0.0524737	0.0295724	0.120597	0.108853	0.114601	0.157599	0.227462	0.197604	0.224746	0.156552	0.219204			-0.341821	1.3391	-0.324578	-0.105274	-0.429461	-0.0233243	-0.436435	3.07803	-0.0973833	0.0528099	0.375191	0.443299	-0.131268	0.137357	-0.303425	0.400195
PORS27	0.114246	0.0731174	0.203356	0.139125	0.100609	0.0947213	0.0857991	0.0600418	0.0907696	0.0890941	0.0908469	0.0895682	0.213436	0.234867	0.271135	0.175502	0.251789			-0.360003	1.78123	-0.315856	-0.276846	-0.0585182	-0.0941943	-0.300205	0.511773	-0.0184584	0.0196734	-0.014075	1.38294	0.100409	0.154423	-0.352713	0.434677
PORS28	0.172627	0.118426	0.253487	0.187918	0.163108	0.16753	0.172887	0.141425	0.161444	0.145885	0.145164	0.156952	0.25639	0.279846	0.29506	0.205271	0.287746			-0.313977	1.14046	-0.258669	-0.132023	0.0271129	0.0319762	-0.181981	0.141554	-0.0963745	-0.004944	0.0812015	0.633559	0.0914879	0.0543667	-0.304308	0.401782
PORS29	0.066215	0.014401	0.110467	-0.00797186	-0.0198335	0.0601887	0.0543363	0.0373439	0.0329961	0.0599179	0.118826	0.117461	0.129749	0.189883	0.124418	0.0820311	0.162634			-0.782511	6.67077	-1.07217	1.48794	-4.0347	-0.0972351	-0.312727	-0.116426	0.815911	0.983149	-0.0114869	0.104611	0.463466	-0.344764	-0.340682	0.982594
PORS30	0.178091	0.125225	0.256137	0.17473	0.141227	0.129929	0.114285	0.0838424	0.126881	0.114914	0.118112	0.159743	0.309607	0.301785	0.348652	0.258947	0.358774			-0.296848	1.0454	-0.317826	-0.191741	-0.0799957	-0.120406	-0.266374	0.513324	-0.0943126	0.0278288	0.352468	0.938154	-0.0252621	0.155299	-0.257291	0.385508
[truncated: 985 more rows]

## Sheet: GVCBDI
No.	Sector	2008	2009	2010	2011	2012	2013	2014	2015	2016	2017	2018	2019	2020	2021	2022	2023
[truncated: 2,205 more rows]
